# Supplementary material for: Phosphoproteomics reveals that Parkinson's disease kinase LRRK2 regulates a subset of Rab GTPases
Source: eLife. 2016 Jan 29;5:e12813. doi: 10.7554/eLife.12813 (PMC4769169; doi:10.7554/eLife.12813)
Supplement: Supplementary file 1. — DOI: http://dx.doi.org/10.7554/eLife.12813.019 [file elife-12813-supp1.xlsx]

## Sheet: Table S1
LOG2 wild type_1	LOG2 wild type_2	LOG2 wild type_3	LOG2 wild type_4	LOG2 A2016T_1	LOG2 A2016T_2	LOG2 A2016T_3	LOG2 A2016T_4	LOG2 G2019S_1	LOG2 G2019S_2	LOG2 G2019S_3	LOG2 G2019S_4	LOG2 G2019S_5	LOG2 G2019S+GSK_1	LOG2 G2019S+GSK_2	LOG2 G2019S+GSK_3	LOG2 G2019S+GSK_4	LOG2 G2019S+GSK_5	LOG2 G2019S+HG_1	LOG2 G2019S+HG_2	LOG2 G2019S+HG_3	LOG2 G2019S+HG_4	LOG2 G2019S+HG_5	Amino acid	Localization prob	Position	Sequence window	Gene names	Protein names	Protein ID (Uniprot)
NaN	NaN	NaN	NaN	NaN	NaN	NaN	NaN	23.1605	23.3377	24.6308	24.088	23.8271	23.9843	24.6929	NaN	22.8523	NaN	24.0128	20.6364	23.032	23.6723	23.9567	S	1	24	EAGGEDFAMDEDGDESIHKLKEKAKKRKGRG	RBM8;Rbm8a	RNA-binding protein 8A	A0A023T672
25.5167	24.7813	24.725	25.6381	26.4805	26.5375	26.7295	26.8003	27.0835	26.6581	25.9764	26.7779	NaN	26.2158	20.7081	25.9797	27.6303	NaN	26.7167	27.321	28.1564	28.2206	NaN	S	0.999987	42	KLKEKAKKRKGRGFGSEEGSRARMREDYDSV	RBM8	RNA-binding protein 8A	A0A023T672
NaN	NaN	NaN	NaN	NaN	NaN	NaN	NaN	25.9457	25.4012	25.4914	25.8786	25.3882	25.3544	25.971	25.7631	26.1391	26.1462	25.0999	24.0208	24.5304	24.2459	25.572	S	0.999994	56	FGSEGSRARMREDYDSVEQDGDEPGPQRSVE;GSEEGSRARMREDYDSVEQDGDEPGPQRSVE	RBM8;Rbm8a	RNA-binding protein 8A	A0A023T672
NaN	NaN	NaN	NaN	NaN	NaN	NaN	NaN	NaN	26.3141	25.3359	26.4264	NaN	25.9877	25.2947	25.5296	NaN	24.7476	26.4825	25.1643	24.3391	23.7909	25.1182	S	0.998005	560	YLLARDDERSEVDGGSGPPTPGPTTTLGPKK	Srcap		A0A087WP63
NaN	NaN	NaN	NaN	NaN	NaN	NaN	NaN	NaN	NaN	NaN	25.4812	NaN	NaN	25.8247	NaN	NaN	NaN	25.4826	24.4421	24.6565	24.1516	24.003	S	0.938783	2709	FIACRHNELGTTTGGSPENGEGTELAITPPA	Srcap		A0A087WP63
NaN	NaN	NaN	NaN	NaN	NaN	NaN	NaN	NaN	NaN	23.5331	24.8568	23.7973	NaN	24.7265	23.3284	24.2651	NaN	NaN	NaN	23.9202	NaN	23.9064	S	0.995913	2882	SPPKRKRGRPPKNPPSPRPSQHPVLDPDSSS	Srcap		A0A087WP63
NaN	NaN	NaN	NaN	NaN	NaN	NaN	NaN	NaN	NaN	NaN	27.088	25.9725	26.7729	26.7082	26.5238	25.263	NaN	26.3129	23.5029	NaN	NaN	25.1802	S	0.774064	2886	RKRGRPPKNPPSPRPSQHPVLDPDSSSILES	Srcap		A0A087WP63
24.412	23.5082	NaN	24.9412	25.8178	24.9402	25.0297	26.5921	25.8846	24.3545	23.2125	26.5556	24.433	23.0397	26.3936	21.5598	24.9311	25.2135	23.3393	26.7345	26.5775	25.1987	24.8646	S	0.875848	2595	SPEGPLPARPPRRRTSADVEIRGQGSGRTGQ	Srcap		A0A087WP63
NaN	NaN	NaN	NaN	NaN	NaN	NaN	NaN	24.3903	22.8629	22.2816	NaN	23.6256	23.4368	23.5168	21.1369	22.076	22.5252	23.4893	23.5889	22.1453	21.8638	22.883	S	0.93007	285	LYGCNQCGKAFARRSSLEIHERTHTGEKPYV	Gm10778;Gm4767		F8VPU7
25.0522	24.2145	25.1088	25.859	26.0644	25.495	25.8134	25.9867	NaN	NaN	NaN	NaN	24.1348	24.6498	24.551	NaN	NaN	NaN	24.4551	NaN	NaN	NaN	24.2406	S	1	190	PPSPPMSGKGTLGRHSPYRTLEPVRPPVVPN	Abi2	Abl interactor 2	P62484
NaN	23.0588	NaN	22.5067	22.698	NaN	NaN	NaN	25.8057	23.612	23.6625	24.2672	23.6138	NaN	24.9157	24.2877	24.4998	24.373	24.177	22.4253	23.2961	23.6553	24.6624	S	0.999921	301	MNRPASRHTPPTIGGSLPYRRPPSITSQTSL	Abi2	Abl interactor 2	P62484
23.837	23.5085	23.6967	25.077	24.2202	24.7165	24.9574	25.0544	25.1744	23.4392	24.6999	24.8323	24.4492	23.8226	24.7985	24.6566	24.6714	25.0047	24.909	NaN	22.8673	24.6062	25.0455	S	0.999994	221	DYVPSPTRNMAPSQQSPVRTASVNQRNRTYS	Abi2	Abl interactor 2	P62484
22.3206	NaN	25.7424	NaN	NaN	NaN	NaN	24.1689	25.3002	NaN	26.261	26.1728	26.3839	26.6253	26.8548	26.5802	27.1212	26.9076	25.8476	26.5552	26.2739	26.3296	26.2309	S	0.999264	362	SGFGTTGKAPVGSVVSVPSHSSASSDKYAAL	Agfg1	Arf-GAP domain and FG repeat-containing protein 1	Q8K2K6
28.7766	28.599	28.8604	29.0483	28.6176	28.741	29.1712	29.5006	30.7191	29.7087	29.4295	30.1428	29.8162	29.4417	30.3796	29.4097	30.2651	30.7266	29.7919	29.424	29.8308	28.8876	30.2061	S	0.999999	181	ESAPALHLNKGTPSQSPVVGRSQGQQQEKKQ	Agfg1	Arf-GAP domain and FG repeat-containing protein 1	Q8K2K6
20.8397	20.9587	23.7444	NaN	NaN	22.1782	NaN	NaN	23.3802	NaN	NaN	NaN	24.7896	NaN	23.9832	24.5547	25.2639	24.6983	NaN	24.6944	23.1617	24.4428	25.0327	S	1	162	SASSTSSTPEVKPLKSLLGESAPALHLNKGT	Agfg1	Arf-GAP domain and FG repeat-containing protein 1	Q8K2K6
24.8276	25.3933	25.5163	25.9309	25.4946	25.3471	25.5284	25.691	NaN	27.0937	26.4184	27.116	26.0919	26.3771	26.6223	NaN	26.1579	NaN	27.1543	26.6243	26.9422	26.5665	27.1231	S	0.99644	75	KKNKKKEIQNGTLRESDSEHVPRDFKLSDAS	Ktn1	Kinectin	A0A087WP48
NaN	NaN	NaN	NaN	NaN	NaN	NaN	NaN	NaN	NaN	22.8963	23.7911	NaN	NaN	22.2149	21.6672	NaN	NaN	NaN	NaN	22.542	22.3144	NaN	S	0.868004	90	SDSEHVPRDFKLSDASPAEDEQFVPAPLNVA	Ktn1	Kinectin	A0A087WP48
NaN	NaN	NaN	NaN	NaN	NaN	NaN	NaN	NaN	20.9888	22.8702	23.211	NaN	20.2252	NaN	NaN	NaN	NaN	NaN	21.4688	22.478	NaN	NaN	S	1	124	SSVRERKKKEKKQKPSLEEQVIKESDASKIP	Ktn1	Kinectin	A0A087WP48
NaN	NaN	NaN	NaN	NaN	NaN	NaN	NaN	25.2176	NaN	24.2403	25.7536	23.77	24.4169	24.9806	NaN	24.2861	24.8027	24.1089	23.379	23.7373	22.902	24.9654	S	0.999994	56	PSHMTSTNSVKLEMQSDEECDRQPLSREDEI	Ikzf2	Zinc finger protein Helios	P81183
23.4941	23.4289	22.0698	24.834	24.9148	25.0546	24.3442	24.873	NaN	NaN	NaN	20.7854	22.0851	NaN	23.8365	23.2731	20.4081	22.797	26.2431	NaN	NaN	NaN	NaN	S	0.999956	1111	EPARTAGVSGLARAASKDTISNNREKIKGWI	Trip12	E3 ubiquitin-protein ligase TRIP12	G5E870
NaN	NaN	NaN	NaN	NaN	NaN	NaN	NaN	NaN	25.006	24.1177	26.7572	26.089	26.6175	26.9134	25.7321	26.9861	26.3906	26.8959	26.435	26.6288	26.2813	25.4679	S	0.91307	1460	VGGKRGRAQTAPTKTSPRNAKKHDELWHDGV	Trip12	E3 ubiquitin-protein ligase TRIP12	G5E870
23.6415	23.8223	23.4723	23.738	23.3108	23.5641	23.661	24.0162	25.691	NaN	25.271	25.37	24.9617	24.7526	24.158	25.3025	24.9254	24.8695	25.4034	23.1936	24.343	23.9544	25.2377	S	1	1024	GSPSLQHSRDDSLDLSPQGRLSDVLKRKRLP	Trip12	E3 ubiquitin-protein ligase TRIP12	G5E870
24.4751	25.0538	25.2156	24.507	25.1834	24.7481	25.2608	25.3474	26.0645	25.3379	25.4501	25.5102	25.8799	25.3155	25.9166	25.5358	25.1479	24.8271	25.3364	23.1602	24.0208	23.9144	25.3911	S	1	1030	HSRDDSLDLSPQGRLSDVLKRKRLPKRGPRR	Trip12	E3 ubiquitin-protein ligase TRIP12	G5E870
NaN	NaN	NaN	NaN	NaN	NaN	NaN	NaN	23.7364	NaN	23.8649	23.3708	23.063	23.1826	23.7731	22.5014	23.6137	23.123	23.5126	21.6661	22.356	24.0559	23.8992	S	0.975726	975	MHQVKHLAESESLLTSPPKACTNGSGSLGST	Trip12	E3 ubiquitin-protein ligase TRIP12	G5E870
24.571	NaN	24.8406	NaN	23.8982	22.8881	22.4884	NaN	NaN	NaN	NaN	NaN	NaN	NaN	NaN	NaN	NaN	NaN	NaN	NaN	NaN	24.4982	NaN	S	1	310	LQAKLASLRKSTKKRSESPPAELPSLRRSTR	Trip12	E3 ubiquitin-protein ligase TRIP12	G5E870
26.4788	26.1083	25.6273	26.5802	26.7478	26.2078	26.9664	26.6051	28.347	26.734	27.2307	28.3261	28.0652	27.9096	27.4585	28.374	28.716	28.2008	28.4913	27.6053	27.94	27.1607	27.0092	S	1	312	AKLASLRKSTKKRSESPPAELPSLRRSTRQK	Trip12	E3 ubiquitin-protein ligase TRIP12	G5E870
NaN	NaN	NaN	NaN	NaN	NaN	NaN	NaN	NaN	NaN	NaN	NaN	NaN	NaN	24.7754	NaN	24.7842	25.1922	NaN	NaN	NaN	23.8095	NaN	S	0.823094	1409	QAVRQFSVQAEDERESTDDESNPLGRAGIWT	Trip12	E3 ubiquitin-protein ligase TRIP12	G5E870
25.1153	24.6857	25.7872	26.0593	26.1313	26.2492	25.934	26.5774	25.3338	26.0862	24.7535	28.444	26.6257	26.6638	27.0868	27.5125	27.0583	27.5219	27.9996	27.1424	27.7497	26.5128	27.5461	S	0.999657	77	QVPKKDNSRGVKRSASPDYNRTNSPSSAKKP	Trip12	E3 ubiquitin-protein ligase TRIP12	G5E870
NaN	NaN	NaN	NaN	NaN	NaN	NaN	NaN	NaN	NaN	23.2505	24.0128	22.727	21.5403	23.1274	22.6814	22.7006	22.9726	NaN	22.0407	22.4505	23.4644	NaN	S	0.978857	1063	YSPPRDDDKVDNQAKSPTTTQSPKSSFLASL	Trip12	E3 ubiquitin-protein ligase TRIP12	G5E870
NaN	NaN	NaN	NaN	NaN	NaN	NaN	NaN	NaN	NaN	19.8232	NaN	24.6268	NaN	NaN	NaN	NaN	NaN	NaN	NaN	21.7825	22.082	25.2621	S	0.998204	1069	DDKVDNQAKSPTTTQSPKSSFLASLNPKTWG	Trip12	E3 ubiquitin-protein ligase TRIP12	G5E870
26.5306	26.6508	26.9657	27.6694	27.225	27.6757	28.0022	28.0658	28.0943	26.7	27.1544	25.7108	26.7169	26.9336	26.3353	26.9112	26.0722	25.225	27.8123	25.6974	26.3086	27.264	26.9752	S	0.99995	1049	KRKRLPKRGPRRPKYSPPRDDDKVDNQAKSP	Trip12	E3 ubiquitin-protein ligase TRIP12	G5E870
24.7574	24.1363	24.4442	24.2572	24.4173	24.3903	24.4601	24.7474	NaN	NaN	NaN	NaN	NaN	NaN	NaN	NaN	NaN	NaN	NaN	NaN	NaN	NaN	NaN	S	1	726	SGPSRPAKAFPHRALSVEDVGAPSLARTVGR	BC034090		F6T2X5
22.388	NaN	22.5422	22.1866	NaN	22.4016	22.3166	21.6039	NaN	NaN	NaN	NaN	NaN	NaN	NaN	NaN	NaN	NaN	NaN	NaN	NaN	NaN	NaN	S	0.993652	684	TLHLVSSSHQHRRATSFQNLHSLLGGKGDRS	BC034090		F6T2X5
NaN	NaN	NaN	NaN	NaN	NaN	NaN	NaN	25.3545	25.3749	25.3806	25.8927	24.7469	25.2234	25.4706	25.5223	25.4339	25.082	24.6158	NaN	24.8191	24.9137	25.525	S	0.998649	1186	LKAAGDTVVIENSDISPEMESPEKETMSVSL	Ktn1	Kinectin	A0A087WP48
NaN	NaN	NaN	NaN	NaN	NaN	NaN	NaN	NaN	25.7767	23.5462	24.1269	NaN	NaN	24.0966	24.1856	NaN	NaN	NaN	NaN	NaN	23.1837	24.5439	S	0.999884	1191	DTVVIENSDISPEMESPEKETMSVSLNQTVT	Ktn1	Kinectin	A0A087WP48
NaN	NaN	NaN	NaN	NaN	NaN	NaN	NaN	24.8185	NaN	22.7702	24.3672	23.5392	23.6797	24.2056	23.525	24.3232	23.859	23.7174	23.7001	24.1593	24.3462	24.1868	S	0.816657	881	LCKCSSEQPNRGLDDST______________	Dstyk	Dual serine/threonine and tyrosine protein kinase	A0A087WP69
NaN	NaN	23.1129	NaN	NaN	NaN	NaN	NaN	NaN	24.4746	23.8145	NaN	NaN	NaN	24.6686	24.1051	NaN	NaN	NaN	NaN	NaN	NaN	NaN	S	0.944327	1482	SQRDSADSRLSKRSLSADEFEILQNPVKESN	Kiaa1551;2810474O19Rik	Uncharacterized protein KIAA1551	Q5DTW7
NaN	NaN	23.7402	23.9447	23.8967	23.2572	23.508	22.8306	26.0885	24.3811	25.6087	26.7777	25.9558	25.8788	26.6095	26.0306	26.503	26.3805	25.8889	23.431	25.5731	NaN	26.8032	S	0.99931	141	APVSQKMHRKIQSSLSVNNDISKKSKVNAVF	Mdfic	MyoD family inhibitor domain-containing protein	Q8BX65
23.6592	23.4555	22.6197	24.0369	23.8155	23.0971	23.0704	23.734	24.3429	23.3818	23.3237	24.0352	23.2855	NaN	NaN	23.7719	22.7606	23.8899	24.3124	23.2511	23.6505	24.3161	24.7243	S	1	129	AKHVSVENHKISAPVSQKMHRKIQSSLSVNN	Mdfic	MyoD family inhibitor domain-containing protein	Q8BX65
NaN	NaN	NaN	NaN	NaN	NaN	NaN	NaN	24.6396	23.8899	21.755	24.0577	23.5925	23.2326	22.9268	NaN	24.284	23.9193	24.2063	23.7722	24.0038	23.6398	23.5722	S	1	28	AEQQCPVEAGGGRLGSPAHEACNEDNTEKDK	Mdfic	MyoD family inhibitor domain-containing protein	Q8BX65
NaN	NaN	NaN	NaN	NaN	NaN	NaN	NaN	25.3631	NaN	23.1731	23.7738	23.4936	24.0382	24.0319	24.6349	24.7561	24.949	24.3263	24.6107	24.5793	NaN	19.6457	S	1	40	SPTEQQTQTDKVQDLSPKSWRLLGVPTIHIT	Gramd1a		A0A087WPB6
NaN	NaN	NaN	NaN	NaN	NaN	NaN	NaN	25.2737	NaN	NaN	23.8707	22.1047	22.1884	24.1577	24.5852	24.517	23.5818	23.8998	NaN	22.7385	NaN	22.4785	S	0.811557	163	AISRAQGLASTSTAPSPSRTLPSSSSPSRAT	Zfand2b	AN1-type zinc finger protein 2B	Q91X58
NaN	NaN	NaN	NaN	NaN	NaN	NaN	NaN	NaN	NaN	22.0818	NaN	23.6337	NaN	NaN	NaN	NaN	NaN	NaN	NaN	NaN	22.1211	23.3347	S	0.826212	763	SAPPPLISTLGGRPGSPRRTTPLSAEIRERP	Auts2		E9PWJ4
NaN	NaN	NaN	NaN	NaN	NaN	NaN	NaN	23.5529	27.3032	27.1067	27.6783	27.2596	NaN	27.6537	24.5483	26.1628	26.0272	27.4657	26.3089	27.5381	27.5608	27.4143	S	1	197	NSSSRASSRASSARASPVVEERPDKDFAEKG	Lrrfip1	Leucine-rich repeat flightless-interacting protein 1	Q3UZ39-2
NaN	NaN	NaN	NaN	NaN	NaN	NaN	NaN	NaN	NaN	NaN	NaN	NaN	NaN	NaN	NaN	25.1415	NaN	NaN	NaN	NaN	NaN	NaN	S	0.873164	193	GSHLNSSSRASSRASSARASPVVEERPDKDF	Lrrfip1	Leucine-rich repeat flightless-interacting protein 1	Q3UZ39-2
24.5019	25.0159	25.3478	24.9946	23.1567	25.0446	25.3831	25.5778	26.607	26.4872	26.3	26.6359	21.5442	25.5806	25.4675	26.3394	26.3404	25.7708	25.9804	25.5838	26.3151	26.4783	25.393	S	1	16	MTSPEGAQNKEIDCLSPEAQRLAEARLAAKR	Lrrfip1	Leucine-rich repeat flightless-interacting protein 1	Q3UZ39
28.1897	28.0268	27.3961	28.0175	27.2503	27.9507	28.4305	28.1857	28.1778	28.7499	28.7589	28.8306	28.4051	25.4748	29.2192	28.6272	29.1502	29.2992	29.1446	27.8674	28.9422	28.8802	28.5746	S	1	88	AATLASLGGTSSRRGSGDTSISMDTEASIRE	Lrrfip1	Leucine-rich repeat flightless-interacting protein 1	Q3UZ39
24.6784	24.5313	NaN	24.6673	NaN	NaN	NaN	NaN	NaN	NaN	NaN	21.2543	NaN	NaN	21.7189	22.5225	23.5365	22.8001	24.2235	NaN	NaN	21.058	24.4104	S	0.857789	3	_____________MTSPEGAQNKEIDCLSPE	Lrrfip1	Leucine-rich repeat flightless-interacting protein 1	Q3UZ39
NaN	NaN	NaN	NaN	NaN	NaN	NaN	NaN	NaN	NaN	26.1419	NaN	NaN	NaN	NaN	NaN	NaN	NaN	NaN	NaN	NaN	NaN	NaN	S	0.755128	78	KGSRNMPSLSAATLASLGGTSSRRGSGDTSI	Lrrfip1	Leucine-rich repeat flightless-interacting protein 1	Q3UZ39
NaN	21.4109	25.7694	NaN	26.2893	NaN	26.2532	26.0391	27.481	NaN	27.6646	26.3068	25.8176	27.2878	NaN	NaN	NaN	25.4703	NaN	NaN	23.8899	NaN	26.2849	S	0.911336	84	PSLSAATLASLGGTSSRRGSGDTSISMDTEA	Lrrfip1	Leucine-rich repeat flightless-interacting protein 1	Q3UZ39
NaN	NaN	NaN	NaN	23.7547	23.4343	24.2794	20.5798	23.6288	NaN	25.3216	25.8662	25.1295	NaN	25.9468	NaN	25.3641	24.0301	NaN	24.5517	24.2216	24.1172	NaN	S	1	1670	LRTLHDIGPEIRRAISGDLTAEEELDKAMKE	Cacna1c	Voltage-dependent L-type calcium channel subunit alpha-1C	Q01815
23.5792	23.9552	23.7732	23.4614	24.5546	24.044	24.3262	23.5306	25.7265	26.1214	25.5796	25.6676	25.7869	25.748	26.009	25.6345	26.33	26.2473	25.4246	25.5399	25.3889	25.4014	25.8377	S	0.991281	2015	ACSGSSSMARRARPVSLTVPSQAGAPGRQFH	Cacna1c	Voltage-dependent L-type calcium channel subunit alpha-1C	Q01815
NaN	NaN	NaN	NaN	NaN	NaN	NaN	NaN	NaN	23.9754	NaN	23.059	23.6446	23.904	24.215	24.245	24.1481	24.3991	24.0201	22.7539	NaN	24.3455	24.1406	S	0.999825	1691	EEELDKAMKEAVSAASEDDIFRRAGGLFGNH	Cacna1c	Voltage-dependent L-type calcium channel subunit alpha-1C	Q01815
25.8676	25.8004	26.1264	26.0413	26.1703	26.4207	27.1304	27.0957	26.5713	25.8851	24.5754	26.0635	25.5314	25.4507	26.3727	26.0317	25.686	26.1949	25.7022	25.0592	26.9085	26.6938	25.3692	S	1	2125	APEDESCAYALGRGRSEEALADSRSYVSNL_	Cacna1c	Voltage-dependent L-type calcium channel subunit alpha-1C	Q01815
NaN	NaN	NaN	NaN	NaN	NaN	NaN	NaN	NaN	NaN	23.4033	21.6682	21.2077	22.3132	NaN	19.903	NaN	NaN	NaN	NaN	21.3008	NaN	NaN	S	0.761685	1978	RPLRPIPTLRLEGAESSEKLNSSFPSIHCSS	Cacna1c	Voltage-dependent L-type calcium channel subunit alpha-1C	Q01815
23.9281	24.5506	23.3777	23.2711	23.7661	24.0692	23.8633	24.0441	24.1249	24.2616	24.5334	23.1867	24.9358	24.9012	25.6582	23.981	21.5767	24.0944	24.8585	24.1509	23.6388	22.5035	24.5668	S	1	1897	PKRSFLRSASLGRRASFHLECLKRQKDQGGD	Cacna1c	Voltage-dependent L-type calcium channel subunit alpha-1C	Q01815
NaN	NaN	NaN	NaN	NaN	NaN	NaN	NaN	NaN	26.6899	26.5884	26.2783	NaN	NaN	22.0761	26.6955	26.2298	25.142	NaN	24.9166	25.6204	26.1269	26.0294	S	0.911061	64	ENIPHGLLSNLGHPQSPPRKRVKGKGSDKDF	Skp2	S-phase kinase-associated protein 2	Q9Z0Z3
NaN	NaN	NaN	NaN	NaN	NaN	NaN	NaN	NaN	NaN	21.5504	21.7353	22.3315	NaN	NaN	NaN	NaN	NaN	NaN	NaN	NaN	NaN	NaN	S	0.848599	973	QPVPNSSSLLGSLFGSRRGKPPPQAHPPSAP	Iqsec1		E9PUA3
NaN	NaN	NaN	NaN	NaN	NaN	NaN	NaN	NaN	NaN	NaN	NaN	NaN	NaN	NaN	NaN	23.5937	NaN	NaN	NaN	NaN	23.1816	NaN	S	0.765119	496	EQTLSKQTYHKETRNSWDSPAFSNDVIRKRH	Iqsec1	IQ motif and SEC7 domain-containing protein 1	E9PUA3
NaN	NaN	NaN	27.3498	NaN	27.1196	27.0259	27.6625	NaN	22.112	26.5865	27.2945	27.1431	27.3938	27.2623	27.2376	26.5136	26.5481	27.3857	26.2051	27.0648	25.9234	26.7861	S	0.973932	74	GPQQRTRRPRLQHSTSVLRKQAEEEAIKRSR	Iqsec1	IQ motif and SEC7 domain-containing protein 1	E9PUA3
23.1289	23.5381	23.9805	24.7533	24.697	23.9217	24.4596	24.8675	26.0791	25.0603	25.3074	25.4074	24.0384	25.322	23.7268	NaN	NaN	NaN	NaN	24.6836	24.5484	24.3232	NaN	S	1	165	RMSRRIVLSNMRMQFSFEGPEKVHSSYFEGK	Iqsec1	IQ motif and SEC7 domain-containing protein 1	E9PUA3
23.1116	22.8987	22.7545	23.0262	23.3656	22.9423	23.0573	23.368	NaN	24.763	24.0754	23.0224	NaN	NaN	23.445	NaN	NaN	NaN	NaN	23.7548	23.3668	22.8421	NaN	S	0.999951	909	SYASGEGLKRSALSSSLRDLSEAGKRGRRSS	Iqsec1	IQ motif and SEC7 domain-containing protein 1	E9PUA3
NaN	NaN	NaN	NaN	NaN	NaN	NaN	NaN	NaN	NaN	NaN	25.5137	23.9542	NaN	NaN	24.072	23.2229	22.3748	NaN	NaN	NaN	24.3298	25.5252	S	0.761746	924	SLRDLSEAGKRGRRSSAGSLESNVEGSIISS	Iqsec1		E9PUA3
23.3877	23.0443	23.5349	23.3365	24.3367	23.7943	23.8165	24.4764	27.2482	26.4572	23.6083	20.7773	26.4611	26.0847	26.4659	26.2443	26.9374	26.8673	26.7709	25.3672	26.0981	25.6561	26.9717	S	1	401	KRQSAYERSLGGQQGSPKHGPHGGPPKGLPR	Iqsec1	IQ motif and SEC7 domain-containing protein 1	E9PUA3
NaN	NaN	NaN	NaN	NaN	NaN	NaN	NaN	24.6011	24.4862	24.4738	25.0244	25.2027	25.2698	25.5551	24.7333	25.6314	26.0366	NaN	23.8432	23.686	25.2258	24.5353	S	0.999751	711	KCGCRRLEDEQPPTLSPKKKQRNGGMRNSPN	Kcnma1	Calcium-activated potassium channel subunit alpha-1	Q08460
NaN	NaN	NaN	NaN	NaN	NaN	NaN	NaN	24.5625	25.1733	23.713	24.5365	NaN	24.816	23.6998	23.9691	NaN	23.7713	NaN	21.4973	22.9067	NaN	23.8298	S	0.997301	1209	DQAPQHSQHVLLSDDSPRFLSVSTEEGCECL	Dopey1	Protein dopey-1	Q8BL99
NaN	NaN	NaN	NaN	NaN	NaN	NaN	NaN	24.1419	24.6369	24.2083	24.1474	24.068	24.1504	24.6136	24.4064	24.054	23.778	24.0459	23.0946	23.9264	23.2715	24.2394	S	0.954817	1261	DSSVPSETKSRQRSHSSIQFSFKEKLSEKVS	Dopey1	Protein dopey-1	Q8BL99
NaN	NaN	NaN	NaN	NaN	NaN	NaN	NaN	NaN	NaN	NaN	21.4451	NaN	NaN	22.1307	NaN	NaN	NaN	23.545	NaN	NaN	NaN	NaN	S	0.939543	119	PRRQKKIRPPPELETSLTERPSSPSLLRNEN	Tmem237	Transmembrane protein 237	Q3V0J1
25.2925	NaN	25.2962	NaN	NaN	NaN	NaN	25.7142	22.887	28.5419	27.6153	27.323	23.0048	NaN	23.1851	26.6772	22.741	28.2709	23.3757	NaN	25.5265	26.339	21.8688	S	0.988578	126	RPPPELETSLTERPSSPSLLRNENGIDAEPR	Tmem237	Transmembrane protein 237	Q3V0J1
24.6851	23.749	24.3536	25.032	24.8495	25.051	25.6447	25.6431	NaN	NaN	NaN	NaN	NaN	NaN	NaN	NaN	NaN	NaN	NaN	NaN	NaN	NaN	NaN	S	0.999975	416	MSPSSSLSALSSRAASVSSLHERILFAPGSE	Kif1a	Kinesin-like protein KIF1A;Kinesin-like protein	P33173
23.386	23.927	NaN	23.0907	23.8956	24.14	23.9675	24.8867	NaN	NaN	NaN	NaN	NaN	NaN	NaN	NaN	NaN	NaN	NaN	NaN	NaN	NaN	NaN	S	0.947401	419	SSSLSALSSRAASVSSLHERILFAPGSEEAI	Kif1a	Kinesin-like protein KIF1A;Kinesin-like protein	P33173
23.7631	24.3954	23.5921	24.4255	25.5086	23.7346	23.7543	25.3474	NaN	NaN	NaN	NaN	NaN	NaN	NaN	NaN	NaN	NaN	NaN	NaN	NaN	NaN	NaN	S	0.999989	1375	VRGEENLAGWRPRSDSLILDHQWELEKLSLL	Kif1a	Kinesin-like protein KIF1A;Kinesin-like protein	P33173
25.8787	25.5914	25.4444	NaN	26.437	26.8736	NaN	NaN	NaN	NaN	NaN	NaN	NaN	NaN	NaN	NaN	NaN	NaN	NaN	NaN	NaN	NaN	NaN	S	0.995619	937	QSESCPVVGMSRSGTSQEELRIVEGQGQGAD	Kif1a	Kinesin-like protein KIF1A;Kinesin-like protein	P33173
24.655	24.9513	25.0079	24.6192	25.5981	25.2302	25.0778	25.4947	NaN	NaN	NaN	NaN	NaN	NaN	NaN	NaN	NaN	NaN	NaN	NaN	NaN	NaN	NaN	S	1	1342	TGVYELSLCHVADAGSPGMQRRRRRVLDTSV	Kif1a	Kinesin-like protein KIF1A;Kinesin-like protein	P33173
NaN	NaN	NaN	NaN	NaN	NaN	NaN	NaN	24.6912	23.8141	20.511	23.6865	23.7912	22.8464	27.1209	26.5075	25.7528	NaN	NaN	NaN	NaN	NaN	NaN	S	0.999794	856	NTSRNKDAILYTYKLSRGLTEEKNYGLKAAE	Msh4	MutS protein homolog 4	Q99MT2
NaN	NaN	NaN	NaN	NaN	NaN	NaN	NaN	NaN	25.4446	25.5616	26.2536	25.8469	25.637	26.1868	26.1714	25.9944	25.8118	25.875	24.6721	25.7173	25.4855	25.7577	S	0.999856	1382	AQLPHHGEPPDEADLSPQSFAMKGTRMLKEI	Xrn1	5'-3' exoribonuclease 1	P97789
NaN	NaN	NaN	NaN	NaN	NaN	NaN	NaN	25.139	24.295	24.6569	24.0205	24.9285	23.6738	25.2093	23.7731	24.0531	24.8347	25.1149	NaN	23.44	NaN	24.4292	S	0.927498	1664	NKPGSSEATKMTPQESPPASSSSSQAAQPVS	Xrn1	5'-3' exoribonuclease 1	P97789
22.8471	22.817	23.5432	24.333	24.0523	23.8974	24.5822	24.2478	NaN	27.2854	26.2255	27.2914	26.5642	26.0105	27.1124	26.1443	26.6384	26.8983	28.0504	25.2431	27.5956	25.3173	26.6457	S	0.999866	1328	GGSARCSIKLLKRNESPGTSEAQKVVTSYPN	Xrn1	5'-3' exoribonuclease 1	P97789
24.4765	23.7923	23.9536	23.8276	24.0224	24.7283	24.6385	24.1948	25.8211	25.492	25.6836	25.5934	25.1882	24.8052	25.6746	24.9571	25.162	25.1655	25.141	24.5458	24.7365	24.929	25.4555	S	1	1054	RQPAEPPGPLRRRAASDGQYENQSPEATSPR	Tns1		A0A087WQS0
24.4516	24.6472	24.0846	25.1591	24.0309	24.5168	25.3022	25.2905	24.7372	24.6826	24.6472	24.7343	24.358	23.6126	24.7941	24.5251	24.4377	24.4855	25.1393	22.0645	NaN	24.2462	24.9012	S	1	1062	PLRRRAASDGQYENQSPEATSPRSPGVRSPV	Tns1		A0A087WQS0
NaN	NaN	NaN	NaN	NaN	NaN	24.1796	NaN	NaN	25.2125	NaN	NaN	24.7623	NaN	NaN	NaN	24.8003	NaN	NaN	NaN	24.7553	NaN	NaN	S	0.856319	1067	AASDGQYENQSPEATSPRSPGVRSPVQCVSP	Tns1		A0A087WQS0
NaN	NaN	NaN	NaN	24.3261	24.3936	NaN	25.1506	26.0566	NaN	NaN	25.1549	24.5132	NaN	NaN	NaN	NaN	21.7402	NaN	24.3971	NaN	24.5022	24.7942	S	0.990573	1070	DGQYENQSPEATSPRSPGVRSPVQCVSPELA	Tns1		A0A087WQS0
25.8912	24.9336	25.4637	24.7699	24.6943	24.3856	24.6888	25.2205	25.2317	24.6411	24.6639	25.5206	24.8308	24.4167	24.7163	24.2588	23.6939	22.5918	23.8743	21.4529	23.2694	24.7813	24.8044	S	1	867	AETPVAALPEFPRAASQQEIEQSIETLNMLM	Tns1		A0A087WQS0
24.4118	24.1642	24.3576	24.1478	23.407	24.0004	24.3735	24.2216	25.576	25.2796	25.4022	24.7269	24.0691	NaN	25.0908	25.3856	25.783	25.603	25.1134	24.2199	23.9841	25.1726	25.5334	S	1	1533	ALPEKRRMSVGDRAGSLPNYATINGKVSSSP	Tns1		A0A087WQS0
NaN	NaN	NaN	NaN	NaN	NaN	NaN	NaN	25.7907	23.7067	NaN	NaN	24.6585	23.9255	24.8379	NaN	25.1269	24.9889	24.3571	24.1196	23.0657	NaN	24.6148	S	0.999986	636	DREKQGAMYRAQQLRSHPGGGPTVPSPGRHI	Tns1		A0A087WQS0
24.2657	24.2549	23.8144	24.0945	24.0261	24.4787	25.0061	24.9822	26.94	26.3765	26.396	23.5614	24.5348	25.3421	27.0962	26.3786	25.4915	26.581	26.4346	NaN	24.829	24.5142	26.6351	S	0.998807	646	AQQLRSHPGGGPTVPSPGRHIVPAQVHVNGG	Tns1		A0A087WQS0
26.2051	25.588	26.0987	25.8867	25.6773	25.7827	26.7767	26.6385	28.1939	27.8335	28.1838	28.3877	27.5779	27.4706	27.9341	27.4377	27.9362	27.664	27.9475	27.7722	28.2884	27.7912	27.7819	S	0.997437	1342	GFGRRAVNPTMAAPGSPSLSHRQVMGPSGPG	Tns1		A0A087WQS0
NaN	NaN	NaN	NaN	NaN	NaN	NaN	NaN	NaN	25.2046	23.4442	23.8386	24.4721	25.1183	24.6434	24.4811	22.7417	21.6074	24.7641	23.716	23.4843	23.525	24.1547	S	0.959751	1622	ALLKDQEPGAFIIRDSHSFRGAYGLAMKVSS	Tns1		A0A087WQS0
22.736	23.0746	23.7909	24.0943	24.4509	22.9731	23.0683	23.6103	23.2964	NaN	NaN	23.8805	21.2863	23.0479	24.2424	21.3708	23.5723	NaN	22.946	NaN	23.3156	24.2657	22.2478	S	0.999572	1624	LKDQEPGAFIIRDSHSFRGAYGLAMKVSSPP	Tns1		A0A087WQS0
23.098	24.4114	24.2993	24.4588	NaN	24.206	24.7325	24.0883	NaN	27.2025	26.6908	26.5088	26.8825	25.4738	26.8635	26.6525	26.203	NaN	21.7368	21.4671	25.2484	25.364	27.0497	S	0.999986	545	GPLDGSLYAKVKKKDSLNGSSGPVTTARPAL	Tns1		A0A087WQS0
NaN	NaN	NaN	NaN	NaN	NaN	NaN	NaN	NaN	25.6213	23.0523	26.0593	24.2524	NaN	24.0143	24.4031	NaN	24.6685	NaN	25.1222	24.3805	24.3025	25.062	S	0.882391	1115	HLHSYKEAFEEMEGTSPSSPPHSVARSPPGL	Tns1		A0A087WQS0
25.6654	25.4578	26.3001	26.0308	NaN	25.7514	26.2025	26.3231	28.4829	28.5158	28.119	29.0124	27.953	27.5743	28.626	28.1609	28.0702	27.6263	27.5059	27.9873	28.1958	28.1072	28.0551	S	0.967041	1118	SYKEAFEEMEGTSPSSPPHSVARSPPGLAKT	Tns1		A0A087WQS0
23.558	23.2974	23.9725	23.6439	23.1593	23.4257	22.8887	23.4386	24.9255	26.0321	25.4847	24.4092	25.0247	24.8685	24.2499	24.9405	24.1538	24.3407	24.1961	22.7694	22.9688	NaN	24.8817	S	1	616	AALSPQEKKELDRLLSGFGVDREKQGAMYRA	Tns1		A0A087WQS0
26.5965	NaN	NaN	NaN	26.2011	NaN	26.3747	NaN	NaN	NaN	NaN	NaN	29.1844	28.8688	NaN	NaN	27.5866	28.7594	NaN	NaN	27.2025	NaN	NaN	S	0.846351	1013	IAQPQLPPKETTSDPSRTPEEEPLNLEGLVA	Tns1		A0A087WQS0
NaN	NaN	NaN	NaN	NaN	NaN	NaN	NaN	NaN	NaN	22.1102	25.5646	NaN	NaN	NaN	24.5751	NaN	NaN	NaN	NaN	25.9824	NaN	NaN	S	0.976606	810	DVEPQLPQAPTRGGSSREAVQRGLNSWQQQQ	Tns1		A0A087WQS0
NaN	NaN	NaN	NaN	NaN	NaN	NaN	NaN	NaN	NaN	22.7097	24.0638	NaN	NaN	NaN	NaN	NaN	24.6408	NaN	NaN	23.9122	25.3306	NaN	S	0.801832	1470	AYGGYSTPEDRRPTLSRQSSASGYQAPSTPS	Tns1		A0A087WQS0
24.8557	24.8573	24.5388	24.4668	24.6192	24.8362	24.7828	23.9007	27.4199	27.2031	27.162	27.5922	26.8435	26.9828	27.3048	27.001	27.2858	26.6475	27.0264	26.6741	27.026	27.2636	27.19	S	0.999864	1440	VISPGSPSLGRHLGGSGSVVPGSPSLDRHAA	Tns1		A0A087WQS0
29.2458	28.9284	29.2959	29.3369	29.2562	29.0281	29.3304	29.6343	30.6938	31.0065	30.5109	30.7034	30.1511	30.2543	30.3684	30.6608	30.4215	30.1799	30.1086	30.444	30.246	30.5431	30.5094	S	0.999897	1447	SLGRHLGGSGSVVPGSPSLDRHAAYGGYSTP	Tns1		A0A087WQS0
NaN	NaN	28.3661	NaN	NaN	NaN	NaN	NaN	NaN	NaN	NaN	NaN	NaN	NaN	29.6608	NaN	NaN	NaN	NaN	NaN	NaN	NaN	NaN	S	0.770367	1427	HQGNLASSLHSNAVISPGSPSLGRHLGGSGS	Tns1		A0A087WQS0
28.256	27.913	NaN	28.2716	27.7982	28.0377	27.5353	27.3871	29.66	28.5562	29.8121	30.0065	30.8565	30.423	29.5186	29.9081	28.6626	28.47	30.641	28.3114	28.0032	29.5196	29.8609	S	0.997033	1430	NLASSLHSNAVISPGSPSLGRHLGGSGSVVP	Tns1		A0A087WQS0
27.7918	27.9282	28.7153	28.571	28.4845	28.526	28.7964	28.591	29.595	29.9136	29.3328	30.1827	29.4203	31.0393	30.1717	29.3851	28.3813	29.1002	28.8691	28.6721	28.4648	27.0572	29.7085	S	0.982046	1402	HQVPGLHSSVVTTPGSPSLGRHPGAHQGNLA	Tns1		A0A087WQS0
28.5602	28.4051	28.2469	28.4373	28.2081	28.0818	28.6439	28.7713	30.0614	NaN	29.8817	29.8116	29.5117	29.2585	29.989	29.7601	29.8512	29.7147	29.8052	29.1799	29.2512	28.9464	29.7314	S	1	1325	SPQARHRTVGTNTPPSPGFGRRAVNPTMAAP	Tns1		A0A087WQS0
25.2616	25.1634	25.8255	24.8683	24.6296	24.3945	24.0825	NaN	NaN	25.7055	24.8819	26.2675	25.3774	25.2565	25.1497	24.6934	25.6515	25.1914	25.3747	25.2816	25.5695	24.8399	25.522	S	0.973377	154	GSSPKNLEEGGSMRVSPSIQPQPQSQPTSLS	Tns1		A0A087WQS0
23.6283	23.8418	24.1163	NaN	NaN	NaN	NaN	NaN	25.6296	NaN	NaN	NaN	25.2855	NaN	NaN	NaN	23.8811	NaN	NaN	NaN	NaN	NaN	NaN	S	0.804396	156	SPKNLEEGGSMRVSPSIQPQPQSQPTSLSRN	Tns1		A0A087WQS0
NaN	NaN	NaN	NaN	NaN	NaN	NaN	NaN	NaN	NaN	NaN	NaN	NaN	NaN	23.2415	NaN	NaN	NaN	NaN	NaN	NaN	NaN	NaN	S	0.979512	163	GGSMRVSPSIQPQPQSQPTSLSRNTSVSRAM	Tns1		A0A087WQS0
NaN	NaN	NaN	NaN	NaN	NaN	NaN	NaN	NaN	NaN	22.3491	25.3431	25.7142	22.9692	25.2472	22.1914	24.8761	25.5083	25.7137	NaN	22.5051	23.4059	24.689	S	0.824127	169	SPSIQPQPQSQPTSLSRNTSVSRAMEDSCEL	Tns1		A0A087WQS0
NaN	NaN	NaN	NaN	NaN	NaN	NaN	NaN	NaN	NaN	NaN	NaN	23.5299	NaN	22.6601	24.586	24.7288	25.7228	NaN	NaN	NaN	NaN	NaN	S	0.973685	574	ALSATPNHVEHTLSVSSDSGNSTASTKTDKT	Tns1		A0A087WQS0
NaN	NaN	NaN	NaN	NaN	NaN	NaN	NaN	NaN	25.9229	26.1507	NaN	24.5236	25.1829	26.5772	24.7124	25.7701	24.793	21.7762	23.4091	22.2377	22.4839	25.5985	S	0.940645	575	LSATPNHVEHTLSVSSDSGNSTASTKTDKTD	Tns1		A0A087WQS0
NaN	NaN	NaN	NaN	NaN	NaN	NaN	NaN	NaN	25.8878	23.2338	24.2752	23.7706	23.7729	24.3841	NaN	24.1948	23.1743	21.9757	22.8786	22.9271	NaN	25.4951	S	0.998339	851	SPLQSLARSKPSPQLSAETPVAALPEFPRAA	Tns1		A0A087WQS0
29.4645	29.6556	29.9201	29.4382	28.7304	29.1799	29.3221	29.403	30.979	30.7115	30.5596	30.9446	30.2159	30.4204	30.7809	31.0959	31.8779	31.4865	31.2405	30.5203	30.6726	30.8942	30.9927	S	1	1514	PATSPSPDSAAFRQGSPTPALPEKRRMSVGD	Tns1		A0A087WQS0
28.3454	28.3341	28.2719	28.0646	27.8196	28.0834	28.244	28.205	28.8295	28.6075	28.9297	28.9444	28.7933	NaN	29.347	28.9938	29.1361	28.5905	29.1362	28.5104	27.782	29.0232	29.1576	S	1	836	WQQQQPHPPPRQQERSPLQSLARSKPSPQLS	Tns1		A0A087WQS0
NaN	22.4722	23.0879	22.4418	21.9173	NaN	22.3856	22.3907	23.5491	NaN	23.7173	24.0263	23.1087	NaN	23.7429	23.5585	23.7406	22.7678	NaN	23.1572	23.5888	23.7679	23.481	S	1	840	QPHPPPRQQERSPLQSLARSKPSPQLSAETP	Tns1		A0A087WQS0
NaN	NaN	NaN	NaN	NaN	NaN	NaN	NaN	27.8009	27.133	25.2921	25.9991	26.5374	26.2903	27.3265	26.9558	26.7652	27.1455	26.1137	26.569	26.4738	25.2026	27.3794	S	1	922	ASPLSSQPLLGSSRQSHPLTQSRSGYIPSGH	Tns1		A0A087WQS0
NaN	NaN	NaN	NaN	NaN	NaN	NaN	NaN	24.8369	NaN	NaN	NaN	NaN	NaN	NaN	NaN	NaN	NaN	NaN	NaN	NaN	NaN	NaN	S	0.861578	928	QPLLGSSRQSHPLTQSRSGYIPSGHSLGTPE	Tns1		A0A087WQS0
26.8249	NaN	NaN	NaN	NaN	27.173	NaN	NaN	NaN	NaN	NaN	NaN	NaN	NaN	NaN	NaN	NaN	NaN	NaN	NaN	NaN	NaN	NaN	S	0.823979	1369	SGPGFHGNVVSGHPASAATTPGSPSLGRHPV	Tns1		A0A087WQS0
25.1511	25.3838	25.4197	NaN	25.6081	25.3431	25.7687	25.8771	26.1826	26.9803	26.775	NaN	25.8977	NaN	26.6044	26.317	25.4524	24.7441	NaN	24.6723	24.7106	24.6751	25.9957	S	0.949571	1376	NVVSGHPASAATTPGSPSLGRHPVGSHQVPG	Tns1		A0A087WQS0
27.4625	27.8646	28.799	29.5972	29.6924	NaN	28.9499	29.3203	22.1259	27.9819	26.2761	NaN	26.6146	27.1204	27.895	27.0158	26.5206	27.199	NaN	27.4473	27.5943	28.9233	28.2707	S	1	1526	RQGSPTPALPEKRRMSVGDRAGSLPNYATIN	Tns1		A0A087WQS0
NaN	NaN	NaN	NaN	NaN	NaN	NaN	NaN	26.523	25.9531	25.9713	26.6055	25.3242	25.1406	25.9882	25.6807	25.1325	25.6678	25.6993	24.5219	25.9244	25.5362	25.2517	S	0.996466	1180	RTAVAGPRAQDVEPKSFSAPAAHAYGHETPL	Tns1		A0A087WQS0
24.1243	NaN	23.0937	22.5553	23.7893	24.7535	24.4488	24.525	25.8725	25.5772	25.4882	24.5292	23.8093	NaN	25.041	22.2289	22.7856	22.9759	25.4208	24.748	24.0874	24.2258	NaN	S	0.999912	1182	AVAGPRAQDVEPKSFSAPAAHAYGHETPLRN	Tns1		A0A087WQS0
24.6942	24.1649	24.6258	23.9418	23.9999	23.6801	23.7842	23.8167	NaN	23.7177	23.7047	24.0054	23.667	23.2147	23.8956	23.2343	NaN	22.6639	23.3177	21.737	22.3772	24.0803	23.3089	S	1	1081	TSPRSPGVRSPVQCVSPELALTIALNPGGRP	Tns1		A0A087WQS0
NaN	26.1833	26.0347	25.8739	25.91	25.9523	26.1866	26.3313	28.1907	27.8415	27.7693	28.2258	28.2422	27.8949	28.3209	27.8233	27.9986	27.953	27.5311	26.7933	27.5042	27.1938	28.2963	S	0.999948	792	SAHCGCDPSGLFRSQSFPDVEPQLPQAPTRG	Tns1		A0A087WQS0
NaN	24.2249	21.2865	NaN	24.2963	23.4406	NaN	NaN	NaN	23.3729	22.2902	22.6779	NaN	NaN	NaN	NaN	23.9848	23.9901	NaN	NaN	NaN	22.0829	23.2504	S	0.785317	899	DLEPASAAAPLHKSQSVPGAWPGASPLSSQP	Tns1		A0A087WQS0
21.8134	22.1839	22.2037	NaN	22.2678	21.8727	21.7804	23.0465	NaN	NaN	NaN	NaN	NaN	NaN	NaN	NaN	NaN	NaN	NaN	NaN	NaN	NaN	NaN	S	0.999949	1136	HSVARSPPGLAKTPLSALGLKPHNPADILLH	Tns1		A0A087WQS0
NaN	NaN	NaN	NaN	NaN	NaN	NaN	NaN	25.0161	NaN	23.8475	24.8708	24.3757	23.8235	24.0768	NaN	23.437	23.0641	NaN	NaN	NaN	24.3428	NaN	S	0.812863	1637	SHSFRGAYGLAMKVSSPPPTITQQGKKGDMT	Tns1		A0A087WQS0
NaN	23.9441	NaN	23.5915	NaN	21.8745	22.9322	NaN	NaN	NaN	23.265	23.9301	23.3081	NaN	NaN	23.0881	23.5544	NaN	NaN	NaN	21.854	NaN	22.7215	S	0.921309	1547	GSLPNYATINGKVSSSPVANGMASGSSTVSF	Tns1		A0A087WQS0
25.3854	25.6427	25.6387	25.4626	25.4937	NaN	NaN	25.4566	NaN	NaN	NaN	NaN	NaN	NaN	NaN	NaN	NaN	NaN	NaN	NaN	NaN	NaN	NaN	S	0.999998	509	VSVDYNTSDPLIRWDSYDNFSGHREDGMEEV	Tns1		A0A087WQS0
23.9967	23.8998	22.9701	23.1575	22.8236	22.682	23.1645	23.5966	26.0113	25.2743	25.5959	26.4515	24.9246	24.8964	25.7811	24.1887	25.4556	25.3105	25.2692	23.8609	25.4101	25.1185	25.6953	S	0.983813	1578	SHTLPDFSKYSMPDNSPETRAKVKFVQDTSK	Tns1		A0A087WQS0
22.858	22.3603	23.8191	24.547	24.9537	24.56	23.6339	23.8233	NaN	NaN	NaN	NaN	NaN	NaN	NaN	NaN	NaN	NaN	NaN	NaN	NaN	NaN	NaN	S	1	129	RAFLQMDSPRHQSDPSEDEDERSTSKPHSTS	Sgk3	Serine/threonine-protein kinase Sgk3	Q9ERE3
NaN	NaN	NaN	NaN	NaN	NaN	NaN	NaN	24.5303	24.5068	23.6989	24.9628	23.1485	23.1697	24.5121	23.5448	24.2648	24.0922	24.6648	23.0522	24.1493	23.9727	23.8964	S	0.999999	213	SVLDEMSLKMAELCDSPREQDSESRTSDKVY	Casp8	Caspase-8;Caspase-8 subunit p18;Caspase-8 subunit p10	O89110
26.2215	24.5353	26.0303	24.7698	24.4423	24.8896	24.946	25.0395	26.5317	26.2372	26.1921	26.9348	26.1491	25.7773	27.4105	26.2141	26.052	26.3217	26.4238	25.1407	25.7271	26.4458	25.4074	S	1	188	GKIEDYERSSTERRMSLEGREELPPSVLDEM	Casp8	Caspase-8;Caspase-8 subunit p18;Caspase-8 subunit p10	O89110
21.8964	22.1112	21.5787	22.1957	21.4779	21.52	NaN	22.1595	NaN	22.9204	22.6235	NaN	21.1995	NaN	22.2574	NaN	NaN	NaN	NaN	NaN	NaN	NaN	20.2342	S	0.945496	8	________MEVLRRSSVFAAEIMDAFDRSPT	Bok	Bcl-2-related ovarian killer protein	O35425
NaN	NaN	NaN	NaN	NaN	NaN	NaN	NaN	NaN	NaN	NaN	23.5885	NaN	NaN	24.4377	NaN	23.7211	23.6523	NaN	NaN	NaN	23.6134	23.7794	S	0.993993	280	GRGEWKCERHALQSASAGSGSFTDVRTAIYQ	Fn1	Fibronectin;Anastellin	P11276
NaN	NaN	NaN	NaN	NaN	NaN	NaN	NaN	NaN	NaN	23.6816	NaN	21.2187	24.3867	22.2194	24.6283	24.9766	25.03	NaN	24.005	NaN	NaN	21.4357	S	0.990868	283	EWKCERHALQSASAGSGSFTDVRTAIYQPQT	Fn1	Fibronectin;Anastellin	P11276
NaN	NaN	NaN	NaN	NaN	NaN	NaN	NaN	26.7777	26.8899	26.4583	26.3691	26.4956	26.0118	25.978	23.8847	25.3972	25.1946	27.4444	26.4506	25.7681	24.8982	25.8685	S	0.998227	285	KCERHALQSASAGSGSFTDVRTAIYQPQTHP	Fn1	Fibronectin;Anastellin	P11276
29.0315	28.8283	29.108	29.0155	29.747	29.7059	29.9276	29.9383	29.7302	29.5912	29.8832	30.2943	30.1765	29.7159	29.9777	29.9626	29.8749	29.9118	29.8277	27.8657	29.0207	29.7278	29.9454	S	1	2475	IECFMPLDVQADRDDSRE_____________	Fn1	Fibronectin;Anastellin	P11276
20.2576	21.7482	NaN	22.9415	23.3653	NaN	20.0918	22.7213	NaN	NaN	NaN	NaN	NaN	NaN	NaN	NaN	NaN	NaN	NaN	NaN	NaN	NaN	NaN	S	0.999976	1382	NIGPDTMRVTWAPPPSIELTNLLVRYSPVKN	Fn1	Fibronectin;Anastellin	P11276
24.9197	24.9617	24.7825	24.6617	24.5604	24.2291	25.0107	24.7166	27.4058	27.4492	27.5795	27.3171	26.9586	NaN	26.1839	26.9664	25.649	25.9536	27.2426	25.195	25.3781	22.9995	27.3539	S	0.998913	1758	ESPQGQVSRYRVTYSSPEDGIRELFPAPDGE	Fn1	Fibronectin;Anastellin	P11276
NaN	NaN	22.347	NaN	21.9648	NaN	22.5441	22.739	25.1588	25.2871	24.2137	25.3845	25.2119	25.2097	25.5915	25.0344	24.8327	24.7053	24.3809	23.0342	23.9593	25.6541	25.208	S	1	41	RTPQEAITDGLEIVVSPRSLHSELMCPICLD	Rnf2	E3 ubiquitin-protein ligase RING2	Q9CQJ4
NaN	23.4275	22.8993	NaN	22.2639	23.5266	23.9678	24.016	NaN	NaN	NaN	NaN	NaN	NaN	NaN	NaN	NaN	NaN	NaN	NaN	NaN	NaN	NaN	S	0.848081	422	GKRPPRATSACAPISSPKTNGLAKDMSSLHI	Agap1	Arf-GAP with GTPase, ANK repeat and PH domain-containing protein 1	Q8BXK8
24.147	24.0374	24.5007	24.5911	24.3624	25.003	25.4756	25.4535	27.4551	27.0148	25.167	25.4319	25.5491	25.4795	27.1458	25.9868	24.6988	25.179	25.9714	26.6584	26.3221	25.5243	26.3054	S	1	521	PSISSSTSPKLDPPPSPHANRKKHRRKKSTS	Agap1	Arf-GAP with GTPase, ANK repeat and PH domain-containing protein 1	Q8BXK8
25.5027	24.9727	25.1225	24.8176	25.6772	25.8835	25.5911	26.1835	26.4999	25.9455	26.0028	26.3274	26.1692	25.724	26.5364	25.6212	26.1304	25.5908	26.2442	25.5566	25.9653	24.82	26.1875	S	0.999415	469	HNFPKSQTPVRMRRNSFTPLSSSNTIRRPRN	Pfkfb2	6-phosphofructo-2-kinase/fructose-2,6-bisphosphatase 2;6-phosphofructo-2-kinase;Fructose-2,6-bisphosphatase	P70265
25.7428	25.7585	26.0558	25.5242	26.5362	26.4489	26.9517	27.0424	25.7351	26.6276	26.5521	26.2463	24.199	23.498	24.281	23.8739	25.0983	24.5017	23.3689	27.0802	25.6169	26.098	23.2933	S	1	486	TPLSSSNTIRRPRNYSVGSRPLKPLSPLRAL	Pfkfb2	6-phosphofructo-2-kinase/fructose-2,6-bisphosphatase 2;6-phosphofructo-2-kinase;Fructose-2,6-bisphosphatase	P70265
21.9697	22.6481	22.9556	22.8718	23.2565	23.635	23.6993	23.6764	NaN	23.9649	23.7047	23.3172	NaN	NaN	NaN	NaN	NaN	NaN	NaN	22.0371	21.9227	NaN	NaN	S	1	496	RPRNYSVGSRPLKPLSPLRALDMQEGADQPK	Pfkfb2	6-phosphofructo-2-kinase/fructose-2,6-bisphosphatase 2;6-phosphofructo-2-kinase;Fructose-2,6-bisphosphatase	P70265
NaN	NaN	NaN	NaN	NaN	NaN	NaN	NaN	26.5343	26.2584	25.9048	26.3289	25.8252	25.3496	26.6592	25.9122	26.4545	26.2231	26.1378	25.862	26.2129	25.4653	26.1641	S	1	313	SDGKSRGRGRRNNNPSPPPDSDLERVFIWDL	Eya1	Eyes absent homolog 1;Eyes absent homolog	P97767
27.3761	27.2409	27.0445	27.8539	27.56	28.0512	28.4261	28.4167	29.681	29.0748	28.6142	29.2515	29.1357	29.0542	29.5427	29.186	29.7587	29.3611	29.3812	28.8915	29.2283	29.3304	29.5167	S	0.998661	117	YASEGELQDRIIKVGSLEESKTRRLFAQIVH	Gm5157		A0A087WRH8
23.3401	22.5463	22.2139	23.0427	23.0283	22.7617	23.1482	23.8879	24.3911	23.8933	23.0901	NaN	24.7894	24.0073	23.7566	22.7129	23.3273	23.6754	NaN	22.8219	NaN	22.0371	22.3778	S	0.823291	142	ILSRRPSYRKILNDLSSDAPGVPRIEEEKSE	Creb1	Cyclic AMP-responsive element-binding protein 1	Q01147
NaN	NaN	NaN	NaN	NaN	NaN	NaN	NaN	NaN	NaN	20.605	NaN	23.9961	NaN	22.4656	24.7847	24.7288	25.1182	25.3562	21.7343	22.4278	23.1997	24.1101	S	0.999566	141	SSAASRMIANSLNHDSPPHTPTRRSDNSTSK	2310022A10Rik	Uncharacterized protein C19orf47 homolog	A0A087WRI8
26.1047	25.7342	25.8344	26.5988	26.5167	26.655	27.1804	27.2317	23.6968	26.9269	25.9738	26.8311	25.7963	25.9011	26.122	25.6821	26.9774	25.8617	25.9702	25.3047	26.0817	24.9264	26.3958	S	0.99993	1137	GKKDCDIVSRDGGAASPATEGRGGSEIEGGR	Clasp1	CLIP-associating protein 1	A0A087WS18
25.244	24.8646	24.987	24.5148	24.7708	24.9508	25.2873	25.4394	26.7259	NaN	NaN	NaN	NaN	NaN	25.8272	26.4337	27.956	26.8498	26.6404	NaN	25.8775	28.7919	27.2608	S	0.996572	720	KRSKIPRSQGCSRETSPNRIGLDRFGLGQSG	Clasp1		A0A087WS18
NaN	NaN	NaN	NaN	NaN	NaN	NaN	NaN	NaN	NaN	NaN	24.1613	24.1905	23.565	NaN	NaN	22.6438	20.1866	NaN	23.8679	24.0459	23.0716	23.561	S	0.962812	734	TSPNRIGLDRFGLGQSGRIPGSVNAMRVLST	Clasp1	CLIP-associating protein 1	A0A087WS18
24.9085	24.8402	26.3876	25.2764	25.6425	25.0665	26.4119	25.9257	25.8216	27.7611	27.9354	27.661	27.8673	28.0237	26.381	28.1154	28.2878	27.7776	27.0663	27.3458	26.9728	28.1584	27.7402	S	1	1110	SLRGVTEAIEKFSFRSQEDLNEPIKRDGKKD	Clasp1	CLIP-associating protein 1	A0A087WS18
26.0939	26.4431	26.1339	26.1128	26.0981	26.0808	26.9816	27.0875	28.6682	28.6442	27.6531	28.8857	28.2599	28.081	28.9157	28.2627	28.74	28.5678	28.6715	28.0893	28.3779	28.4688	28.3304	S	0.999882	1044	LLHNHLKNSSNTGVGSPSNTIGRTPSRHPSS	Clasp1	CLIP-associating protein 1	A0A087WS18
25.1219	24.4554	24.6061	24.9389	24.7762	24.729	25.9155	26.1142	27.3199	27.5347	26.8929	27.3381	26.7212	26.493	26.954	27.2194	26.7589	21.7383	26.7605	24.4166	26.7174	27.2622	26.932	S	0.992648	646	PGSYASLGRIRTRRQSSGSTTNVASTPSDSR	Clasp1		A0A087WS18
NaN	NaN	NaN	NaN	NaN	NaN	NaN	NaN	NaN	NaN	NaN	NaN	NaN	NaN	NaN	NaN	NaN	NaN	NaN	NaN	NaN	23.8967	NaN	S	0.915643	649	YASLGRIRTRRQSSGSTTNVASTPSDSRGRS	Clasp1		A0A087WS18
NaN	NaN	NaN	NaN	NaN	NaN	NaN	NaN	19.06	NaN	NaN	NaN	NaN	28.8163	NaN	27.3548	22.9756	19.2187	23.6168	NaN	NaN	27.7195	NaN	S	0.986902	572	SSSQESLNRPLSAKRSPTGSTASRGSTVSTK	Clasp1	CLIP-associating protein 1	A0A087WS18
28.4926	28.6103	28.3593	27.7246	28.2925	28.7564	NaN	28.878	28.7568	22.4857	28.6105	29.2899	28.8395	28.4052	29.7574	29.283	29.7548	29.5714	NaN	NaN	28.1893	29.1939	29.5254	S	0.998968	600	STKSVSTTGSLQRSRSDIDVNAAASAKSKVS	Clasp1	CLIP-associating protein 1	A0A087WS18
NaN	NaN	25.1785	25.5929	25.4092	25.5955	26.0995	26.448	27.368	26.2211	26.5937	26.7863	26.8382	26.4668	27.2839	27.0266	27.1221	26.9736	26.9457	26.1702	26.851	26.9964	27.4708	S	0.998455	594	SRGSTVSTKSVSTTGSLQRSRSDIDVNAAAS	Clasp1	CLIP-associating protein 1	A0A087WS18
23.3979	23.3291	23.4633	23.4087	23.7391	22.4868	23.8447	24.1576	NaN	NaN	NaN	NaN	NaN	NaN	23.0318	NaN	NaN	NaN	23.1416	NaN	NaN	22.0713	NaN	S	0.978599	636	PAFSSAAALPPGSYASLGRIRTRRQSSGSTT	Clasp1	CLIP-associating protein 1	A0A087WS18
23.8857	23.4496	24.1687	25.1972	25.1371	25.3113	25.9429	26.3072	24.4959	NaN	23.6685	26.5308	25.8021	25.6317	26.2528	25.7336	26.5335	25.8097	26.2417	25.7872	26.1638	26.1762	26.192	S	0.999956	672	PSDSRGRSRAKVVSQSQPGSRSSSPGKLLGS	Clasp1		A0A087WS18
24.8801	24.7161	25.4065	25.7611	25.9507	26.2478	27.101	27.152	25.9135	28.5953	26.7409	28.3743	28.0254	27.6205	27.9289	27.998	27.7741	27.21	28.6784	27.8408	27.4542	26.6479	28.4099	S	1	676	RGRSRAKVVSQSQPGSRSSSPGKLLGSGLAG	Clasp1		A0A087WS18
22.4639	22.5179	NaN	21.8618	23.5615	23.3357	23.5433	24.0439	23.2349	23.8633	23.5156	23.3775	22.9278	23.455	23.4169	22.9104	22.3593	22.8916	23.0136	NaN	21.4179	NaN	23.2737	S	1	210	VSPMEEEKAKKSFLQSLECLRRSTQSLSLQR	Ag2;Gm13889	Uncharacterized protein C11orf96 homolog	Q3UPL5
NaN	NaN	NaN	NaN	NaN	NaN	NaN	NaN	23.8855	22.329	NaN	21.7762	20.6259	22.2167	21.931	21.5072	21.7084	22.6596	22.2898	NaN	22.5623	22.5103	NaN	S	0.999979	26	DSVFEQRPERRPEPPSPYRAKLCEPQCF___	9130401M01Rik	Uncharacterized protein C8orf76 homolog	A0A087WSQ8
25.2961	25.7696	26.2581	25.5494	25.6308	25.4672	26.1233	26.3382	27.964	28.7104	28.5745	28.208	28.3855	27.92	26.9347	27.3409	27.2119	27.5004	26.9825	25.6549	27.5097	27.6947	28.4253	S	0.992394	750	GRIPGSVNAMRVLSTSTDLEAAVADALKKPV	Clasp1	CLIP-associating protein 1	A0A087WS18
NaN	NaN	NaN	NaN	NaN	NaN	NaN	NaN	NaN	25.3718	22.9628	22.8398	NaN	23.1542	22.6271	22.7076	NaN	23.7644	NaN	21.8628	NaN	NaN	24.4709	S	0.917537	83	SLPGVKKSLGKYGPSSVEDTTGSGAADAKDD	Eef1b;Eef1b2	Elongation factor 1-beta	O70251
NaN	NaN	NaN	NaN	NaN	NaN	NaN	NaN	NaN	24.8804	22.3065	24.2972	23.6251	23.462	24.1035	22.8406	23.0812	NaN	NaN	NaN	22.1404	23.1884	NaN	S	0.751438	90	SLGKYGPSSVEDTTGSGAADAKDDDDIDLFG	Eef1b;Eef1b2	Elongation factor 1-beta	O70251
22.9186	NaN	23.4712	23.4722	23.5138	23.3757	23.3606	24.0207	NaN	NaN	NaN	NaN	NaN	NaN	NaN	NaN	NaN	NaN	NaN	NaN	NaN	NaN	NaN	S	0.999995	261	HPATGATPSSSLRRLSQLYNFH_________	Srgap2		A0A087WS73
23.0754	23.2153	24.8741	24.9615	24.4472	24.4136	24.2582	24.5866	NaN	25.6092	24.1007	24.4112	24.737	25.29	24.2807	24.4184	24.3903	23.559	25.482	21.4116	23.8943	25.2441	25.6173	S	0.999969	845	YLANINKQRKRPESGSIRKAFRSDSHGLGSS	Srgap2	SLIT-ROBO Rho GTPase-activating protein 2	Q91Z67
NaN	NaN	NaN	NaN	NaN	NaN	NaN	NaN	NaN	24.2153	24.4578	23.9136	24.6028	24.3523	25.2035	25.0627	24.3118	NaN	25	NaN	NaN	23.3719	25.4959	S	0.997831	164	KLASYQAARKDSTSLSPARGHSVCSTSSLYL	Myc	Myc proto-oncogene protein	P01108
22.6296	22.0767	22.848	22.616	22.5237	21.9268	22.4136	22.9833	25.8774	24.6718	25.3055	25.4388	25.3524	25.9575	25.4324	24.2362	24.6505	24.9439	26.017	24.2043	23.9298	25.711	25.0234	S	0.963097	62	EDIWKKFELLPTPPLSPSRRSGLCSPSYVAV	Myc;Mycn	Myc proto-oncogene protein;N-myc proto-oncogene protein	P01108
NaN	NaN	NaN	NaN	NaN	NaN	NaN	NaN	24.5475	25.9849	25.2346	24.7997	23.7014	24.3427	23.2496	25.3339	24.338	24.339	24.1578	21.5341	24.1433	24.0411	23.7956	S	0.999986	293	ESGSSPSRGHSKPPHSPLVLKRCHVSTHQHN	Myc	Myc proto-oncogene protein	P01108
25.2674	25.6853	25.2002	24.9666	26.0329	26.0997	26.2724	26.5478	27.4222	27.1031	27.0113	26.8734	26.8198	26.9238	26.9994	27.077	26.9836	26.6984	26.9023	25.5621	26.5326	26.9755	26.8664	S	0.999142	180	EPSTTSGGGQLNRAGSISTLDSLDFARYSDD	Kiaa1468;2310035C23Rik	LisH domain and HEAT repeat-containing protein KIAA1468	Q148V7
23.3415	23.8152	23.2213	24.716	NaN	NaN	24.5609	24.9189	24.1562	NaN	23.3015	23.5153	NaN	23.7769	23.4871	24.1391	23.6204	24.2942	NaN	23.6549	24.2593	24.6342	NaN	S	1	422	SLVWSSQKDSEDNRQSPAVNSSDQEKTKDVH	Kiaa1468;2310035C23Rik	LisH domain and HEAT repeat-containing protein KIAA1468	Q148V7
23.6483	23.7262	24.2123	24.9498	NaN	NaN	25.6524	25.8081	27.037	NaN	24.474	25.1104	25.2871	24.6871	25.3315	26.1987	25.5664	26.5156	24.9933	25.2837	24.7159	26.9783	25.802	S	1	497	KQAGRPKGSKGKEKDSPFKPKLYKGDRGLPL	Rbbp5	Retinoblastoma-binding protein 5	Q8BX09
NaN	NaN	NaN	NaN	NaN	NaN	NaN	NaN	NaN	NaN	NaN	NaN	NaN	NaN	NaN	NaN	NaN	NaN	NaN	NaN	24.9167	25.4243	NaN	S	1	68	YISNTFSCPKLSECPSNLRRCMTVSFHVCDG	Hemt1		A0A087WST8
24.0704	23.4611	23.6354	24.6759	24.8644	24.7402	25.3063	25.5179	25.7193	NaN	NaN	24.5271	25.1599	25.264	26.0562	25.418	25.5238	24.3859	25.5019	NaN	NaN	25.0255	26.0212	S	1	327	TYRTTRLKCGERDELSPKRIKIEDGFPDFQE	Nab1	NGFI-A-binding protein 1	Q61122
NaN	NaN	NaN	NaN	NaN	NaN	NaN	NaN	NaN	24.4427	23.9071	NaN	NaN	24.1708	23.5485	NaN	NaN	NaN	NaN	NaN	NaN	NaN	NaN	S	0.972083	182	ESEHSLSPADLGSPASPKESSEALDAAAALS	Nab1	NGFI-A-binding protein 1	Q61122
NaN	NaN	NaN	NaN	NaN	NaN	NaN	NaN	NaN	24.5485	23.4344	24.9583	24.6813	24.1375	24.8794	23.5207	NaN	NaN	24.2062	23.2186	NaN	24.4228	24.4464	S	0.999985	405	RRLTAGLYRQSSGEQSPDGGLPSDSSDGQGE	Nab1	NGFI-A-binding protein 1	Q61122
26.72	26.7919	26.602	26.7547	26.8274	26.9225	27.3081	27.1743	27.5943	28.3632	27.8583	28.0103	27.9007	27.8855	28.0339	26.8903	27.1727	26.5382	26.8182	26.8164	27.0908	28.0882	27.9047	S	1	4789	PQLGSGRWEQDNRALSPVIPIIPRTGIPVFP	Kmt2d	Histone-lysine N-methyltransferase 2D;Histone-lysine N-methyltransferase	Q6PDK2
24.2318	24.3273	NaN	24.158	24.8334	24.8129	25.121	25.3759	27.3104	27.5152	26.4295	27.384	26.9429	27.4287	25.9485	26.7533	26.9084	26.8207	27.095	25.7313	26.2576	27.5752	25.9137	S	0.983772	2318	GLRAQEPPPAQALAPSPPSHPDVFRSGPYPD	Kmt2d	Histone-lysine N-methyltransferase 2D;Histone-lysine N-methyltransferase	Q6PDK2
NaN	23.87	24.069	23.7271	24.1795	23.912	24.5659	24.5081	26.8559	26.9488	26.6594	26.4831	26.4039	26.1846	26.681	26.3278	25.7966	25.9267	25.9868	25.0283	25.4004	25.3724	26.4312	S	1	2231	ESPGVAGGKASEPLLSPPPFGESRKSLEVKK	Kmt2d	Histone-lysine N-methyltransferase 2D;Histone-lysine N-methyltransferase	Q6PDK2
25.6389	25.2519	25.706	25.622	25.6762	25.9711	25.638	26.3976	28.1185	28.2167	28.024	28.302	27.6992	27.5525	28.3245	26.6709	27.9432	27.5838	27.6638	27.5616	27.9858	27.945	27.5803	S	1	2299	FKAPLTPRASQVEPQSPGLGLRAQEPPPAQA	Kmt2d	Histone-lysine N-methyltransferase 2D;Histone-lysine N-methyltransferase	Q6PDK2
21.6578	20.6131	21.1789	NaN	21.7069	NaN	21.5769	22.0486	NaN	NaN	NaN	NaN	NaN	NaN	NaN	NaN	NaN	NaN	NaN	NaN	NaN	NaN	NaN	S	0.977091	628	PEVSRFLPLPVLSHLSPLPEVSRLSPPPEES	Kmt2d	Histone-lysine N-methyltransferase 2D;Histone-lysine N-methyltransferase	Q6PDK2
22.5723	22.7372	22.2667	23.2158	23.3202	23.2362	23.6617	23.5762	26.2432	26.5681	26.2281	26.2618	25.7409	25.9217	25.0525	25.9156	25.9795	25.6971	26.0751	24.3354	24.2969	23.8634	24.332	S	1	727	PEELRLCPQPEEPYLSPQPEEPRLCPQPEEL	Kmt2d	Histone-lysine N-methyltransferase 2D;Histone-lysine N-methyltransferase	Q6PDK2
NaN	NaN	NaN	NaN	NaN	NaN	NaN	NaN	25.0393	26.2407	25.854	25.3897	23.7809	24.2906	23.7824	24.9747	24.4076	24.3127	25.2314	24.1187	23.356	22.8564	NaN	S	1	1627	GVEQMECEIKLEGPASPDVELGKEETEESKK	Kmt2d	Histone-lysine N-methyltransferase 2D;Histone-lysine N-methyltransferase	Q6PDK2
NaN	NaN	NaN	NaN	NaN	NaN	NaN	NaN	NaN	26.291	24.8408	24.7094	NaN	NaN	24.3578	NaN	NaN	NaN	22.6841	22.587	22.4799	23.2981	25.7358	S	0.868255	4382	PPSSPQEPKRPSQLPSPSAQLTPTHPGTPKP	Kmt2d	Histone-lysine N-methyltransferase 2D;Histone-lysine N-methyltransferase	Q6PDK2
NaN	NaN	NaN	NaN	NaN	NaN	NaN	NaN	NaN	25.4117	23.9264	25.5048	25.0974	24.6726	24.4212	23.8934	NaN	NaN	NaN	23.938	25.3467	23.7649	23.802	S	0.999734	3122	LPEVKPKVEEGGRHPSPCQFTINTPKVEPAP	Kmt2d	Histone-lysine N-methyltransferase 2D;Histone-lysine N-methyltransferase	Q6PDK2
24.6819	24.8518	25.1801	24.5095	24.2269	24.6747	24.4782	25.0999	26.8252	27.0572	26.819	26.3541	26.8862	26.7787	27.516	26.8931	26.3168	26.9	26.7487	26.8064	26.883	26.4604	27.2707	S	0.999871	2597	LPYLTHGASQRVGITSPVEKREDPGATMSSS	Kmt2d	Histone-lysine N-methyltransferase 2D;Histone-lysine N-methyltransferase	Q6PDK2
NaN	NaN	NaN	NaN	NaN	NaN	NaN	NaN	23.3203	24.6131	24.1025	23.326	23.8205	23.3578	23.5185	22.2681	22.5365	NaN	22.174	21.4717	21.9105	NaN	23.1705	S	1	4410	PKPQGPALELPPGRVSPAAAQLADTFFGKGL	Kmt2d	Histone-lysine N-methyltransferase 2D;Histone-lysine N-methyltransferase	Q6PDK2
22.1888	22.5017	24.3483	NaN	22.6626	22.0005	NaN	23.0562	26.1572	27.888	28.4288	28.7046	27.9191	27.2206	28.2081	28.1198	28.1522	27.9592	26.2432	27.3624	26.7067	27.9547	28.2654	S	1	102	ASKQEQHEEEKAPEVSPAQPKPGVAAPPEVA	Prrc2c	Protein PRRC2C	Q3TLH4
NaN	NaN	NaN	NaN	NaN	NaN	NaN	NaN	NaN	23.8068	20.3212	23.6007	27.3758	28.8587	24.3523	24.7962	28.606	27.5427	29.6946	28.5847	25.5087	22.641	25.9956	S	0.998858	2646	RSTTPTSSPFRATSTSPNSQSSKMNSVVYQK	Prrc2c	Protein PRRC2C	Q3TLH4
NaN	NaN	NaN	NaN	NaN	NaN	NaN	NaN	NaN	NaN	NaN	22.4437	NaN	NaN	NaN	NaN	NaN	NaN	NaN	NaN	NaN	NaN	24.003	S	0.952169	1051	LPPPAPAQPQPQPLVSPPVQPEPEKPPSTET	Prrc2c	Protein PRRC2C	Q3TLH4
NaN	NaN	NaN	NaN	NaN	NaN	NaN	NaN	NaN	23.9147	23.5623	24.2582	23.2566	23.2367	23.3512	NaN	22.3623	NaN	23.6187	23.6806	23.6167	22.7234	NaN	S	0.995277	755	MIPPKPLIRRDQMEGSPNSSESFEHIARSAR	Prrc2c	Protein PRRC2C	Q3TLH4
27.5021	27.1194	27.0697	27.9285	27.5817	27.9114	28.3451	28.0799	22.9219	28.2963	27.7293	27.6586	27.7967	27.3191	27.3052	28.5112	27.9215	28.0901	28.2408	27.3028	27.7226	26.5434	28.2209	S	1	853	ARDSTETEEQKFLSRSLEDVKPRHVDTNTQS	Prrc2c	Protein PRRC2C	Q3TLH4
NaN	NaN	NaN	NaN	NaN	NaN	NaN	NaN	NaN	NaN	NaN	NaN	NaN	22.2384	NaN	NaN	21.3803	NaN	NaN	21.4898	21.7854	NaN	NaN	S	0.999571	1965	APAVLNDISKKLGPISPPQPPSVSAWNKPLT	Prrc2c	Protein PRRC2C	Q3TLH4
25.6506	25.1342	25.6935	27.1541	27.3882	26.6309	27.2601	27.1715	NaN	28.0206	27.0335	25.5179	22.6615	NaN	25.3088	26.1006	25.8294	24.3902	25.0652	25.4284	25.6749	24.584	25.9729	S	0.999862	899	EERISALESQPARKRSVSHGSNHAQNAEEQR	Prrc2c	Protein PRRC2C	Q3TLH4
NaN	NaN	NaN	25.3589	NaN	NaN	NaN	NaN	NaN	25.9251	24.8439	21.8927	23.3468	NaN	23.9056	NaN	NaN	NaN	24.6738	25.5785	NaN	24.5771	23.5781	S	0.999875	901	RISALESQPARKRSVSHGSNHAQNAEEQRNE	Prrc2c	Protein PRRC2C	Q3TLH4
26.5933	25.4964	26.519	27.2126	24.8222	25.4149	27.3498	NaN	NaN	NaN	22.2613	NaN	NaN	NaN	NaN	NaN	NaN	NaN	NaN	NaN	NaN	NaN	NaN	S	1	904	ALESQPARKRSVSHGSNHAQNAEEQRNEPSV	Prrc2c	Protein PRRC2C	Q3TLH4
NaN	NaN	NaN	NaN	NaN	NaN	NaN	NaN	24.2093	NaN	NaN	NaN	NaN	NaN	NaN	NaN	NaN	NaN	23.4228	NaN	NaN	NaN	NaN	S	1	501	LKQLDEKLGIIEKQPSPEELREREREKERER	Prrc2c	Protein PRRC2C	Q3TLH4
NaN	NaN	NaN	NaN	NaN	NaN	NaN	NaN	25.547	23.6327	24.3981	25.486	24.8374	24.332	25.4333	25.5464	26.0862	25.3817	25.6525	25.3628	26.3602	25.0712	26.0551	S	1	1541	NRRGNNGPPKSGRNFSGPRNERRNGPPSKGG	Prrc2c	Protein PRRC2C	Q3TLH4
NaN	NaN	NaN	NaN	NaN	NaN	NaN	NaN	22.1981	22.0736	NaN	NaN	NaN	NaN	NaN	NaN	NaN	NaN	NaN	NaN	NaN	NaN	23.0142	S	0.997166	1894	TVQTQTQTQTHKPVQSPLPPSAPSSKQPPPS	Prrc2c	Protein PRRC2C	Q3TLH4
NaN	NaN	NaN	NaN	NaN	NaN	NaN	NaN	26.3264	NaN	25.6438	25.7571	25.2005	26.0561	23.89	23.9948	NaN	22.4133	NaN	25.5824	23.7936	25.6891	23.326	S	0.895416	1215	RTEHVPSGPLRQREESETRSESSDFEVVPKR	Prrc2c	Protein PRRC2C	Q3TLH4
NaN	NaN	NaN	NaN	NaN	NaN	NaN	NaN	23.5399	24.9743	NaN	NaN	23.0831	22.8883	23.4736	22.8714	23.8982	23.9785	23.8251	22.7708	23.4653	24.1332	23.4131	S	0.999802	1236	SSDFEVVPKRRRQRGSETDTDSEVHESASDK	Prrc2c	Protein PRRC2C	Q3TLH4
26.5268	26.2558	25.9345	26.4776	26.1483	26.4141	26.5915	27.7043	27.1544	27.4689	26.5627	27.1689	26.8447	26.5419	27.6223	26.4153	25.9367	26.4552	27.5638	25.1017	27.6268	29.466	26.944	S	0.995153	1516	ESVLPPKREIAKRSFSSQRPGVDRQNRRGNN	Prrc2c	Protein PRRC2C	Q3TLH4
23.9461	23.5395	22.8984	23.7303	23.4833	23.6249	24.4402	24.3892	24.9428	24.6937	24.0051	24.8794	24.0653	24.2615	23.969	23.7591	24.5213	24.2466	NaN	24.2853	24.6474	23.1892	23.4843	S	0.99954	18	SKKNRKRQKEGAEGASPSLSAAPSRSGTSTP	Spata5	Spermatogenesis-associated protein 5	Q3UMC0
NaN	NaN	NaN	NaN	NaN	NaN	NaN	NaN	NaN	NaN	23.0286	23.1584	23.3556	NaN	NaN	22.2995	23.8538	22.8861	NaN	NaN	23.1835	NaN	24.873	S	0.998247	244	DLSFQLSQLDLKEPQSPSSQSTPCKPTNDRT	Spata5	Spermatogenesis-associated protein 5	Q3UMC0
NaN	NaN	NaN	NaN	NaN	NaN	NaN	NaN	26.3635	23.957	24.2129	24.6892	25.9342	NaN	26.0458	22.8727	24.485	22.6754	25.6878	NaN	23.3157	24.669	24.4939	S	0.999987	1316	PLLPKLPPKTYKRELSHPPLYRLPLLENAET	Sos2	Son of sevenless homolog 2	Q02384
NaN	NaN	23.6749	22.6084	22.6111	NaN	22.9996	NaN	23.5478	NaN	24.8816	24.03	23.1723	NaN	25.275	24.1963	23.5953	23.5602	NaN	NaN	24.2713	23.7387	25.0556	S	0.999941	299	APEFLSIPKDRPRKKSAPETLTLPDPEKKAT	Pitpnc1	Cytoplasmic phosphatidylinositol transfer protein 1	Q8K4R4
23.9935	NaN	24.8697	25.289	24.0522	24.159	24.4831	24.4571	NaN	NaN	20.9391	NaN	26.8092	23.8602	24.207	NaN	22.3397	NaN	26.5915	NaN	NaN	NaN	NaN	S	1	32	VSTFFTFAGREGRKGSLNINEFKELATQQLP	S100a13	Protein S100-A13	P97352
NaN	22.4677	23.8054	23.9184	23.7108	23.732	23.5341	23.6405	20.5104	24.5944	25.0978	27.1179	26.1586	26.0746	26.9475	26.264	26.748	26.5747	26.3766	26.2773	27.0478	27.0895	26.1006	S	0.998376	163	LDLTHNNGKFNSDSHSPKVSSQNRTRLFGHF	Arhgap12	Rho GTPase-activating protein 12	Q8C0D4
NaN	NaN	NaN	NaN	NaN	NaN	NaN	NaN	23.8753	NaN	22.8107	NaN	23.8399	NaN	23.3535	NaN	NaN	NaN	NaN	NaN	NaN	NaN	23.221	S	0.841037	444	KDSPTTTKLCLPENESPPTSSKHQDPGQEKY	Arhgap12	Rho GTPase-activating protein 12	Q8C0D4
NaN	NaN	NaN	NaN	NaN	NaN	NaN	NaN	26.6839	27.4123	27.4295	27.5781	27.1798	26.7904	27.3444	27.2605	27.1708	26.9135	26.56	26.0032	25.4736	25.3882	27.2976	S	0.99987	584	QVAEADEAAEEETPDSPGVEKHDKEKDQKEL	Arhgap12	Rho GTPase-activating protein 12	Q8C0D4
NaN	NaN	NaN	NaN	NaN	NaN	NaN	NaN	NaN	NaN	22.661	22.4385	22.4375	NaN	NaN	NaN	NaN	NaN	NaN	NaN	NaN	21.9405	NaN	S	0.901771	420	DRRLQEPIVLTKWRHSTIVLDSNDKDSPTTT	Arhgap12	Rho GTPase-activating protein 12	Q8C0D4
25.6952	25.966	25.8785	25.8225	26.2086	25.239	26.1838	26.303	NaN	NaN	NaN	NaN	NaN	NaN	NaN	NaN	NaN	NaN	NaN	NaN	NaN	NaN	NaN	S	0.99941	26	WGESEFSRLYHGGYRSPQRPFPMIDENNDVS	Swi5	DNA repair protein SWI5 homolog	Q8K3D3-2
24.0522	24.4476	24.2207	23.9896	24.4022	NaN	24.3928	24.6883	NaN	NaN	NaN	NaN	NaN	NaN	NaN	NaN	NaN	NaN	NaN	NaN	22.6091	NaN	NaN	S	0.973562	815	PILSKSTKKELASGSSPALLRSLSHWEMSRA	Mapkbp1	Mitogen-activated protein kinase-binding protein 1	Q6NS57
NaN	NaN	NaN	NaN	NaN	NaN	NaN	NaN	NaN	23.4857	NaN	25.3019	25.0768	24.993	24.5276	23.8231	NaN	NaN	NaN	24.79	25.0368	24.776	23.5085	S	0.999963	889	LAPSPRGPSQDSLAVSPAGPGKHGPQGPELS	Mapkbp1	Mitogen-activated protein kinase-binding protein 1	Q6NS57
24.7891	23.8371	24.7245	25.0819	25.412	24.1648	25.4451	25.7132	24.8787	24.7221	24.824	25.1875	25.2924	24.8459	25.7278	23.5781	23.3616	23.7647	24.9299	24.316	24.7729	22.7644	24.7621	S	0.998542	19	GEGSTITSRIKNLLRSPSIKLRRSKAGNRRE	Mapkbp1	Mitogen-activated protein kinase-binding protein 1	Q6NS57
NaN	NaN	NaN	NaN	NaN	NaN	NaN	NaN	22.1202	23.8702	NaN	23.8435	NaN	23.1411	22.6704	23.7768	24.2288	22.9683	NaN	22.5622	23.1058	23.0841	23.3129	S	0.959692	756	ELRQRQRGIKQQGPTSPQRASGAKQHHAPVV	Mapkbp1	Mitogen-activated protein kinase-binding protein 1	Q6NS57
23.6931	23.4378	23.3452	23.8042	23.6807	23.5006	24.1882	24.199	23.9131	24.2052	24.367	24.3416	24.1789	23.8883	24.4128	23.8422	23.9732	23.9094	23.9434	22.8886	23.8234	24.1108	24.3939	S	0.999355	1252	QNHTTSSMAKLARSISVGENPGLATEPQAPV	Mapkbp1	Mitogen-activated protein kinase-binding protein 1	Q6NS57
NaN	NaN	NaN	NaN	NaN	NaN	NaN	NaN	NaN	NaN	NaN	20.8495	21.8668	NaN	18.863	NaN	NaN	NaN	NaN	NaN	NaN	NaN	NaN	S	0.9993	277	YPRIHFPLATYAPVISAEKAYHEQLSVAEIT;YPRIHFPLATYAPVISAEKAYHEQLTVAEIT	Tuba4a;Tuba1b;Tuba1a;Tuba3a;Tuba1c	Tubulin alpha-4A chain;Tubulin alpha-1B chain;Tubulin alpha-1A chain;Tubulin alpha-3 chain;Tubulin alpha-1C chain	P05213
21.9853	23.0013	22.6434	22.7032	22.8023	22.8628	22.5809	23.3784	23.0908	20.6662	22.9724	22.7838	21.7325	21.3777	22.7929	21.867	20.8576	20.4679	NaN	NaN	NaN	NaN	20.2889	S	1	232	LDIERPTYTNLNRLISQIVSSITASLRFDGA	Tuba4a;Tuba1b;Tuba8;Tuba1c	Tubulin alpha-4A chain;Tubulin alpha-1B chain;Tubulin alpha-8 chain;Tubulin alpha-1C chain	P05213
NaN	NaN	NaN	NaN	NaN	NaN	NaN	NaN	NaN	NaN	25.029	25.6118	NaN	25.1189	25.7632	23.0664	25.2096	22.3624	NaN	NaN	NaN	22.244	24.6225	S	0.897078	194	GKMPIDLVIDDREGGSKSDSEDVTRSANLTD	Meis1	Homeobox protein Meis1	Q60954
24.2238	23.9717	24.3191	24.9562	25.0616	24.7064	25.2718	25.0429	28.3766	27.971	27.3129	27.3862	25.836	26.3201	26.9609	25.4388	26.4096	24.9618	25.7058	25.3393	26.1156	24.6572	25.7941	S	0.999966	196	MPIDLVIDDREGGSKSDSEDVTRSANLTDQP	Meis1	Homeobox protein Meis1	Q60954
NaN	NaN	NaN	NaN	NaN	NaN	NaN	NaN	22.3609	NaN	NaN	NaN	NaN	23.74	22.3617	23.3759	23.019	23.607	NaN	NaN	NaN	NaN	23.0126	S	0.944265	259	GPPVSERVDPQSRRESSLDILAPGRRRKNMS	Plekhg5	Pleckstrin homology domain-containing family G member 5	Q66T02
NaN	NaN	NaN	NaN	NaN	NaN	NaN	NaN	NaN	23.9086	23.9072	24.1066	24.2136	23.9467	23.3292	22.4809	23.6249	22.7181	NaN	22.9914	23.1618	24.235	NaN	S	0.987832	938	PVQLLPRPPRLLKSKSEASLLQLLSGTPAAR	Plekhg5	Pleckstrin homology domain-containing family G member 5	Q66T02
NaN	NaN	NaN	NaN	NaN	24.8315	NaN	NaN	NaN	NaN	23.1131	NaN	NaN	NaN	25.6017	NaN	25.5174	NaN	NaN	NaN	NaN	NaN	26.8353	S	0.837029	941	LLPRPPRLLKSKSEASLLQLLSGTPAARGVP	Plekhg5	Pleckstrin homology domain-containing family G member 5	Q66T02
25.3902	25.0441	24.5322	24.8062	25.4723	25.2826	26.0063	25.7409	25.6856	26.327	25.8858	26.26	26.0837	26.0599	26.3095	25.641	25.902	25.7758	24.5068	24.3129	23.0825	25.9937	24.8447	S	0.999947	964	TPAARGVPPAPSRSLSELCLISVAPGVRTQR	Plekhg5	Pleckstrin homology domain-containing family G member 5	Q66T02
22.7926	NaN	22.6196	21.6125	23.6964	23.1495	NaN	NaN	24.0301	24.2287	23.3258	22.9572	22.8915	24.4253	24.2361	23.7861	22.9626	NaN	23.856	23.6801	23.4606	23.3833	24.2756	S	0.996277	234	DEGKVEQGVKDSKSLSLPALRPSGAGPPVSE	Plekhg5	Pleckstrin homology domain-containing family G member 5	Q66T02
NaN	NaN	NaN	NaN	NaN	NaN	NaN	NaN	NaN	24.6593	24.5871	23.0079	23.9839	23.9868	24.2881	24.1191	NaN	24.1255	24.0903	NaN	20.8994	NaN	22.6882	S	1	165	TNPRDEEPEDINIAISKESRRFRGFQDSVEV	Kct2;9530068E07Rik	Keratinocyte-associated transmembrane protein 2	Q8K201
23.1366	NaN	23.3393	23.3978	23.4779	23.9803	24.5241	24.4938	23.4437	NaN	24.6313	24.7614	NaN	NaN	23.6749	22.9374	23.9056	NaN	23.7509	23.5438	23.8658	24.117	NaN	S	0.912527	451	KEKRINPPSSGGTSSSPIKAIFPSPASLVAT	Pou2f1	POU domain, class 2, transcription factor 1;POU domain protein	P25425
NaN	NaN	NaN	NaN	NaN	NaN	NaN	NaN	NaN	22.9425	22.2503	NaN	22.481	NaN	22.8824	22.3203	23.6797	22.3725	24.2388	21.4879	22.1843	22.8933	21.9291	S	0.765711	298	SLRIEPGSSSPRLVSSKEDLAGPSAGSSSAR	Ralgps1	Ras-specific guanine nucleotide-releasing factor RalGPS1	A2AR50
28.4175	28.6417	28.8746	27.596	27.897	28.3779	28.5627	28.5004	30.7419	31.0731	29.7443	30.6715	29.3724	30.0509	30.0517	30.1213	29.9167	29.8633	30.1067	30.3303	29.9736	29.3546	30.4735	S	0.999766	1069	QDQKIKAPVHFVEPLSPTGVPGHRKPPRLGQ	Camsap1	Calmodulin-regulated spectrin-associated protein 1	A2AHC3
NaN	NaN	NaN	22.1284	22.4568	22.3764	22.2882	22.991	22.5082	NaN	NaN	NaN	21.9614	NaN	22.4889	22.0165	21.4721	19.4798	NaN	NaN	NaN	22.8058	NaN	S	0.93598	415	HSEEPECLGKGASTFSPSHPLLPLRQKQQKV	Camsap1	Calmodulin-regulated spectrin-associated protein 1	A2AHC3
NaN	NaN	NaN	NaN	NaN	NaN	NaN	NaN	NaN	NaN	18.7295	NaN	21.2041	23.2359	23.3166	22.0753	22.3431	21.6643	23.489	22.0752	NaN	26.2123	NaN	S	0.982979	445	VSQTEEIPDQRHRSNSLTRVDGQPRGAIGAW	Camsap1	Calmodulin-regulated spectrin-associated protein 1	A2AHC3
NaN	NaN	NaN	NaN	NaN	NaN	NaN	NaN	NaN	23.394	NaN	21.5313	24.0575	23.9312	NaN	NaN	24.8042	22.9753	24.8674	23.0242	NaN	22.2445	23.9527	S	0.99917	823	VKMTSFAERKLQRLNSCETKSSTSSSQKTTP	Camsap1	Calmodulin-regulated spectrin-associated protein 1	A2AHC3
24.8731	NaN	25.4377	25.4995	25.8871	25.2866	25.5687	26.1882	23.6645	NaN	25.9376	26.5821	NaN	NaN	25.6847	NaN	NaN	NaN	NaN	25.2676	26.9282	21.5559	NaN	S	0.949815	469	RGAIGAWPDKKNRPVSQPTSFALHHAASCDV	Camsap1	Calmodulin-regulated spectrin-associated protein 1	A2AHC3
26.5743	26.071	27.2264	27.7788	28.1085	28.1368	29.1437	29.2641	25.8242	26.6402	25.8059	26.8737	24.8465	24.961	26.5556	26.1526	26.7413	26.1633	26.5588	25.6769	26.5167	26.5238	25.9714	S	1	1353	GLGKPKSKPKKPRPKSVHREESYSDSGTKCS	Camsap1	Calmodulin-regulated spectrin-associated protein 1	A2AHC3
21.4046	21.5888	21.5683	22.823	23.1423	22.6454	NaN	21.924	NaN	NaN	NaN	NaN	NaN	NaN	NaN	NaN	NaN	NaN	NaN	NaN	NaN	NaN	NaN	S	0.952946	1359	SKPKKPRPKSVHREESYSDSGTKCSSTHNLS	Camsap1	Calmodulin-regulated spectrin-associated protein 1	A2AHC3
NaN	25.3187	24.8476	24.5045	24.851	24.9736	25.4998	25.5541	27.5304	27.965	27.5217	27.0406	21.6237	26.5504	27.3224	26.851	26.4383	26.6462	NaN	24.9732	24.9468	24.0581	26.7815	S	0.990163	1133	TLPQSRSLPPSTHPRSPSDPGGELPEKCLFD	Camsap1	Calmodulin-regulated spectrin-associated protein 1	A2AHC3
23.8899	NaN	24.0493	23.691	22.7322	23.7424	23.9933	23.995	23.4472	24.2037	24.2987	24.4119	24.0481	23.4349	23.3296	20.738	NaN	22.3096	23.8733	23.3294	21.8189	22.4583	23.554	S	0.999962	553	DEELVAIIRTDVSPPSPQMPRTSPQAPGLVA	Camsap1	Calmodulin-regulated spectrin-associated protein 1	A2AHC3
22.9511	22.8397	23.2974	22.9349	23.2189	23.1437	23.6384	23.5486	NaN	NaN	22.2451	22.4615	22.3235	22.4535	22.7383	22.5538	20.816	22.582	21.9551	NaN	21.4632	21.5185	23.2403	S	0.802124	560	IRTDVSPPSPQMPRTSPQAPGLVASIRSPQR	Camsap1	Calmodulin-regulated spectrin-associated protein 1	A2AHC3
NaN	NaN	NaN	NaN	NaN	NaN	NaN	NaN	NaN	22.1403	22.1558	20.7939	NaN	21.4412	20.2933	21.3632	NaN	NaN	NaN	NaN	19.6887	NaN	20.4509	S	0.999996	1407	PESVYSGGTPSHRVESLEALPILSRNPSRST	Camsap1	Calmodulin-regulated spectrin-associated protein 1	A2AHC3
NaN	NaN	NaN	NaN	NaN	NaN	NaN	NaN	NaN	NaN	20.7391	22.2378	NaN	NaN	22.0108	NaN	21.5861	NaN	NaN	NaN	NaN	NaN	NaN	S	0.971493	41	EVSKNKDGKDQGEPVSPSEDEPFSWPGPKTV	Arhgap21	Rho GTPase-activating protein 21	Q6DFV3
NaN	NaN	NaN	NaN	NaN	NaN	NaN	NaN	22.4074	NaN	NaN	NaN	NaN	NaN	NaN	22.0598	NaN	21.3458	NaN	NaN	NaN	NaN	19.6511	S	0.999999	1411	QYSRELLVSSIFAAASRKRKKPKEKAQPSSS	Arhgap21	Rho GTPase-activating protein 21	Q6DFV3
NaN	NaN	NaN	NaN	NaN	NaN	NaN	NaN	25.9678	NaN	NaN	26.0278	24.8752	24.6144	25.789	24.9639	24.2688	23.4116	NaN	NaN	23.1458	NaN	25.0159	S	0.999362	1699	IECDTLSRKKSARFKSDSGSPGDTRTEKETP	Arhgap21	Rho GTPase-activating protein 21	Q6DFV3
NaN	NaN	NaN	NaN	NaN	NaN	NaN	NaN	NaN	22.9233	22.7792	23.0024	22.6039	22.752	22.1483	22.066	NaN	NaN	NaN	22.0091	21.6201	22.7323	23.3662	S	1	1651	SDRLFRGKFQEVARVSRRNSEGSEASCTEGS	Arhgap21	Rho GTPase-activating protein 21	Q6DFV3
25.5915	25.5153	25.665	25.48	24.8734	25.5543	25.7617	25.9144	27.7184	27.4349	27.422	25.5529	27.5972	26.494	27.677	28.3721	28.5106	28.0899	27.4104	26.6628	27.4022	26.3069	27.7627	S	1	609	TTTGVSLQRGIAQDRSPLVKVRSNSLKVPPP	Arhgap21	Rho GTPase-activating protein 21	Q6DFV3
24.6197	24.4409	24.1405	24.3716	24.429	24.2931	25.0398	25.148	NaN	NaN	23.0897	23.6699	23.1868	23.8366	NaN	NaN	NaN	NaN	NaN	24.2282	NaN	20.778	NaN	S	0.999757	1728	TPALAKMFDVMKKGKSTGSLLTPSRSESEKQ	Arhgap21	Rho GTPase-activating protein 21	Q6DFV3
24.1777	24.1135	24.4903	23.8947	24.3483	24.7353	25.4603	23.9198	27.1043	26.3577	25.6348	26.0257	26.1983	26.1171	26.5279	26.1851	26.7398	26.4987	26.3184	26.2512	27.0429	26.8523	26.4666	S	0.999151	917	TDSQKSSEDSGSRKGSSSEVFSDAAREGWLQ	Arhgap21	Rho GTPase-activating protein 21	Q6DFV3
24.7111	24.6854	24.1517	25.5024	NaN	25.2641	25.7428	25.7249	NaN	22.9083	25.5525	26.1123	25.2833	NaN	27.288	27.3119	26.952	NaN	27.0456	25.9618	26.5571	25.8965	23.7788	S	0.874321	1108	PKEESERKLLSKDDTSPPKDKGTWRRGIPSI	Arhgap21	Rho GTPase-activating protein 21	Q6DFV3
NaN	NaN	NaN	NaN	NaN	NaN	NaN	NaN	24.207	23.459	22.8268	23.1779	23.5188	NaN	22.6504	23.2422	23.1542	22.781	23.4004	22.7834	23.0217	23.6114	22.6581	S	0.840376	248	TQPGRAYRMEIQVPPSPTDVAKSNTAVCVCN	Arhgap21	Rho GTPase-activating protein 21	Q6DFV3
NaN	NaN	NaN	24.6839	24.5264	24.426	25.0127	21.631	NaN	NaN	NaN	NaN	NaN	NaN	NaN	NaN	NaN	NaN	NaN	NaN	NaN	NaN	NaN	S	0.999473	1501	PWEEPPPPHSSKRNRSPTLSCRLAMLKEGPR	Arhgap21	Rho GTPase-activating protein 21	Q6DFV3
NaN	NaN	NaN	NaN	NaN	NaN	NaN	NaN	26.676	NaN	25.0794	NaN	26.1274	NaN	26.7427	26.4321	26.381	26.3863	26.4055	25.4897	24.7484	25.2383	26.0537	S	0.993505	1655	FRGKFQEVARVSRRNSEGSEASCTEGSLTPS	Arhgap21	Rho GTPase-activating protein 21	Q6DFV3
NaN	NaN	NaN	NaN	NaN	NaN	NaN	NaN	NaN	26.4255	NaN	25.5022	NaN	NaN	NaN	NaN	NaN	NaN	NaN	NaN	NaN	NaN	NaN	S	0.770839	1658	KFQEVARVSRRNSEGSEASCTEGSLTPSLDS	Arhgap21	Rho GTPase-activating protein 21	Q6DFV3
24.1826	NaN	NaN	NaN	24.0182	24.8189	24.8226	25.1017	NaN	27.2645	25.6686	26.6401	25.8035	27.507	25.4041	25.6246	26.2151	26.3088	27.2882	26.6334	26.7129	26.7679	25.7102	S	0.999972	850	PPSLTTSAPLIRRQLSHDQESVGPPSLDGQH	Arhgap21	Rho GTPase-activating protein 21	Q6DFV3
NaN	NaN	NaN	NaN	NaN	NaN	NaN	NaN	24.759	NaN	23.5487	23.8183	23.9376	24.0602	24.3916	24.4793	23.0635	23.2187	24.1675	22.6083	24.0053	23.213	NaN	S	0.957106	471	RLEDSVLMKYCPRSASQGALTSPPVSFNNHR	Arhgap21	Rho GTPase-activating protein 21	Q6DFV3
NaN	NaN	NaN	NaN	NaN	NaN	NaN	NaN	NaN	NaN	22.7285	21.6587	NaN	NaN	NaN	NaN	NaN	NaN	NaN	NaN	25.1399	NaN	NaN	S	0.781821	435	NQVVPTRTTLQVRRRSTSHDRVPQSVQIRQR	Arhgap21	Rho GTPase-activating protein 21	Q6DFV3
NaN	NaN	NaN	NaN	NaN	NaN	NaN	NaN	NaN	NaN	NaN	NaN	NaN	NaN	NaN	NaN	NaN	NaN	NaN	NaN	NaN	24.6978	NaN	S	0.810233	437	VVPTRTTLQVRRRSTSHDRVPQSVQIRQRSV	Arhgap21	Rho GTPase-activating protein 21	Q6DFV3
NaN	NaN	NaN	NaN	NaN	NaN	NaN	NaN	24.3336	23.4147	23.8786	24.7153	24.4065	NaN	23.7402	NaN	24.1839	23.0178	24.4185	23.4022	23.9888	24.4066	24.5523	S	0.999838	453	HDRVPQSVQIRQRSVSQERLEDSVLMKYCPR	Arhgap21	Rho GTPase-activating protein 21	Q6DFV3
22.2602	21.4742	22.1468	23.1624	22.5428	21.459	22.4934	24.0243	NaN	NaN	NaN	NaN	NaN	NaN	NaN	NaN	NaN	NaN	NaN	NaN	NaN	NaN	NaN	S	0.967978	1092	TLLGAKSEPKTQSPHSPKEESERKLLSKDDT	Arhgap21	Rho GTPase-activating protein 21	Q6DFV3
26.8749	26.2892	26.6366	27.5032	26.5475	27.3597	27.3507	26.9838	28.4624	NaN	23.2905	26.4541	28.0452	27.4963	28.5541	27.5014	28.0076	28.0241	28.1912	NaN	25.7729	NaN	27.1908	S	0.902404	1847	DLSISDWLARERVRTSASDLSRGEGLEPQAE	Arhgap21	Rho GTPase-activating protein 21	Q6DFV3
NaN	NaN	NaN	21.8397	24.1317	24.328	24.9658	24.4449	25.2738	24.0693	24.117	24.3301	24.347	24.5633	25.4244	24.6925	24.2505	NaN	24.9083	24.3983	24.6242	24.5882	25.1581	S	1	94	LARRGLQNDMVLGTRSVRQDQPLPGKGSPVD	Ano1	Anoctamin-1;Anoctamin	Q8BHY3
NaN	NaN	25.4121	NaN	26.8339	NaN	26.7498	26.8099	NaN	27.5828	27.3027	27.4051	26.7016	26.8643	27.3479	27.2131	26.1217	27.4404	24.3292	27.102	27.3021	27.706	27.5967	S	1	156	FEWLSRHTCAEPDAESPKPREWNSDPGTRSG	Inpp5b	Type II inositol 1,4,5-trisphosphate 5-phosphatase	Q8K337
22.6403	22.674	NaN	22.9155	NaN	NaN	NaN	22.8613	NaN	NaN	21.169	22.6103	22.0505	22.6228	23.1641	21.3817	21.6937	20.134	23.0906	NaN	NaN	22.6088	22.5947	S	0.995476	5	___________MACLSPSQLKKFQEDGFLLL	Phyhd1	Phytanoyl-CoA dioxygenase domain-containing protein 1	Q9DB26
NaN	NaN	NaN	NaN	NaN	NaN	NaN	NaN	23.7046	NaN	22.8099	NaN	19.7871	23.2843	NaN	22.5826	23.4629	24.1194	23.4706	22.362	NaN	22.7503	23.0119	S	0.999976	5985	LTTIKDTQDIVHDLESPGIDPSIIKQQVEAA	Macf1	Microtubule-actin cross-linking factor 1	E9QA63
NaN	NaN	NaN	NaN	NaN	22.2255	22.8615	22.9621	NaN	NaN	NaN	NaN	NaN	NaN	NaN	NaN	NaN	NaN	NaN	NaN	NaN	NaN	NaN	S	1	102	VHRDQSHCKMKKLPNSPMKAQKGSSQTKLEK	Zcchc11	Terminal uridylyltransferase 4	B2RX14
NaN	21.807	24.4924	22.0853	21.3919	22.4455	22.4718	23.047	24.0004	25.6659	24.1432	25.6878	25.3124	24.3435	25.6633	24.98	25.4368	25.3156	23.9813	24.7403	25.1464	25.5745	26.0885	S	1	131	EKTPSLQTKAEKVPKSPNLPVKAEKAPCTTA	Zcchc11	Terminal uridylyltransferase 4	B2RX14
25.1839	25.0786	24.6422	24.4824	25.0281	24.998	25.5427	25.5228	26.7979	26.7756	25.7398	26.9345	26.9335	26.4854	26.8594	26.4161	26.72	26.1026	26.5928	25.3144	26.3086	26.8257	26.6993	S	0.996075	176	ENTPTSQMKLQKTPRSPLEPENVPSLLLKEN	Zcchc11	Terminal uridylyltransferase 4	B2RX14
23.0757	22.6656	22.9008	22.1199	22.9395	23.2348	23.2959	24.0127	25.5433	NaN	24.2976	25.6697	25.1684	25.3342	25.717	25.3327	25.2431	24.9015	24.8711	25.1765	25.1574	25.5476	25.2354	S	0.999754	96	LEAFLGGPKVTPAPLSPPPSAPAALKMYPSV	Srebf1	Sterol regulatory element-binding protein 1;Processed sterol regulatory element-binding protein 1	Q9WTN3
NaN	NaN	NaN	NaN	NaN	NaN	NaN	NaN	NaN	24.9216	23.8132	24.9543	24.2934	23.8554	23.3936	NaN	NaN	NaN	NaN	22.9768	23.9849	22.6885	24.3411	S	0.999969	2252	VSSPATSEVSGKDGLSPPGSSHPSPGRDTPV	Ttc28	Tetratricopeptide repeat protein 28	Q80XJ3
NaN	NaN	NaN	NaN	NaN	NaN	NaN	NaN	NaN	NaN	24.3722	24.248	24.9228	24.2753	24.7045	NaN	NaN	24.4789	24.9653	NaN	NaN	24.3343	24.8146	S	0.937249	1373	TSLFSGTVSPSKDGTSSLPRRQNSLAKPPLR	Ttc28	Tetratricopeptide repeat protein 28	Q80XJ3
23.7482	23.1999	23.6633	23.6632	23.2456	23.5484	23.4099	24.1424	25.7598	24.3792	NaN	24.3265	NaN	NaN	24.5421	24.2928	25.2766	24.2128	NaN	23.5912	NaN	NaN	24.1597	S	0.974067	1374	SLFSGTVSPSKDGTSSLPRRQNSLAKPPLRA	Ttc28	Tetratricopeptide repeat protein 28	Q80XJ3
23.223	23.1247	23.5009	22.9866	22.7095	23.0865	23.0654	23.783	26.1039	22.6205	25.0092	25.3914	26.2476	NaN	26.2315	25.6329	25.3983	25.7033	25.1966	23.771	24.9498	23.755	25.9848	S	1	2268	PPGSSHPSPGRDTPVSPADPPLFRLKYPSSP	Ttc28	Tetratricopeptide repeat protein 28	Q80XJ3
NaN	NaN	NaN	NaN	NaN	NaN	NaN	NaN	21.1727	22.582	21.3592	21.2618	22.237	22.2248	21.8993	20.0958	19.9215	19.1888	21.5103	NaN	NaN	21.8989	22.0433	S	1	2370	GTLTSKRDVLSLLNLSPRHGKEEGGADRLEL	Ttc28	Tetratricopeptide repeat protein 28	Q80XJ3
23.2843	22.4066	22.8006	22.8728	23.0022	23.0488	23.0727	23.2605	26.6535	26.567	26.1448	26.5772	26.5211	26.2752	26.7359	26.1567	26.1948	26.023	25.7807	NaN	24.7046	25.0103	26.4601	S	1	24	PEPASARSRRRREPESPPAPIPLFGARTVVQ	Ttc28	Tetratricopeptide repeat protein 28	Q80XJ3
23.6707	22.2415	23.6006	23.8133	23.2832	23.3138	23.7762	23.9469	26.2312	25.2843	25.5422	25.9671	NaN	NaN	26.0758	NaN	24.7085	25.9407	NaN	25.6203	24.8716	25.1438	25.9844	S	0.999589	2102	VRLSVSSKGSVSTPNSPVKMTLIPSPNSPFQ	Ttc28	Tetratricopeptide repeat protein 28	Q80XJ3
NaN	NaN	NaN	NaN	NaN	NaN	NaN	NaN	22.9878	21.5441	21.128	21.8156	21.091	22.8639	23.1782	NaN	NaN	21.2858	NaN	NaN	NaN	NaN	NaN	S	0.949547	2111	SVSTPNSPVKMTLIPSPNSPFQKVGKLASSD	Ttc28	Tetratricopeptide repeat protein 28	Q80XJ3
22.4879	21.5206	NaN	20.3522	21.1637	21.6753	22.3714	22.4221	NaN	NaN	22.0571	23.3542	21.5489	22.8588	22.4044	NaN	NaN	NaN	NaN	NaN	23.0042	22.7165	NaN	S	0.998924	2114	TPNSPVKMTLIPSPNSPFQKVGKLASSDTGE	Ttc28	Tetratricopeptide repeat protein 28	Q80XJ3
NaN	NaN	NaN	NaN	NaN	NaN	NaN	NaN	NaN	23.2121	24.1039	23.0773	25.0047	24.1598	24.5838	24.8555	24.6558	24.6086	24.8383	23.3675	NaN	NaN	23.4481	S	1	1381	SPSKDGTSSLPRRQNSLAKPPLRALYDLLIA	Ttc28	Tetratricopeptide repeat protein 28	Q80XJ3
23.9465	23.6399	24.1671	23.7121	24.0629	23.303	24.1065	24.1584	24.6326	21.7286	23.0352	23.5269	24.7962	23.3369	24.8977	24.5413	23.7816	24.9336	24.5851	24.3267	24.2686	24.7975	23.7829	S	0.999552	2219	SAFSKPILSHQRSQLSPLTVKPQPPARSSSL	Ttc28	Tetratricopeptide repeat protein 28	Q80XJ3
NaN	NaN	NaN	NaN	NaN	NaN	NaN	NaN	26.1774	NaN	NaN	24.8745	24.3271	25.2237	24.7078	24.1962	25.008	19.2905	NaN	23.9381	24.3222	25.6999	24.8556	S	0.998908	41	PAPIPLFGARTVVQRSPDEPALSKAEFVEKV	Ttc28	Tetratricopeptide repeat protein 28	Q80XJ3
NaN	NaN	NaN	NaN	NaN	NaN	NaN	NaN	24.9858	24.7068	24.5212	25.131	25.0067	24.9412	25.2165	21.9637	23.4749	24.5565	24.5304	24.0997	23.1137	23.6953	24.6873	S	0.998405	1588	IPESLRVQDDASDVESISDCPPLRELLLTAA	Ttc28	Tetratricopeptide repeat protein 28	Q80XJ3
24.0664	23.778	24.6122	24.1529	23.4973	24.0518	24.002	24.3868	26.9284	26.4864	26.1612	27.0065	23.0974	26.0662	26.9143	26.6005	26.7531	26.8227	26.0991	25.5893	26.8263	26.6827	26.9463	S	0.999961	2239	KPQPPARSSSLPKVSSPATSEVSGKDGLSPP	Ttc28	Tetratricopeptide repeat protein 28	Q80XJ3
NaN	NaN	NaN	25.5941	26.5023	26.3133	NaN	NaN	26.3999	NaN	NaN	NaN	NaN	NaN	NaN	NaN	NaN	NaN	NaN	NaN	NaN	NaN	NaN	S	0.957502	10	______METRESTESSPGKHLVTSEELISEG	Nudt5	ADP-sugar pyrophosphatase	Q9JKX6
23.3339	22.8551	23.2987	24.0848	24.1495	24.1315	24.4138	24.3934	23.4604	23.1906	23.5495	23.4413	21.8768	22.1523	22.7895	NaN	22.498	NaN	NaN	NaN	22.5264	21.4342	21.621	S	1	405	KEGDTKDKKDEEEDMSLD_____________	Adrm1;Gm9774	Proteasomal ubiquitin receptor ADRM1	Q9JKV1
NaN	NaN	NaN	NaN	NaN	NaN	NaN	NaN	NaN	25.1646	24.163	24.9616	NaN	NaN	24.1345	24.3201	23.4498	NaN	NaN	23.5173	23.8463	22.6996	23.3926	S	0.963725	211	GSSGPPASSSSSSSRSQSAAVTPSSSTSSAR	Adrm1;Gm9774	Proteasomal ubiquitin receptor ADRM1	Q9JKV1
NaN	NaN	NaN	NaN	NaN	NaN	NaN	NaN	NaN	23.241	22.969	23.6696	23.3124	22.6882	23.6948	23.4406	22.5362	NaN	NaN	22.2285	23.6003	23.2303	22.6955	S	0.819861	257	SLTSSSFKESPGGCTSPGSQEKVPIKDHDGE	Map9	Microtubule-associated protein 9	Q3TRR0
23.6553	23.7744	23.8654	25.0051	25.2477	25.2462	25.6597	25.5781	25.1972	24.0576	22.3199	21.9439	24.5154	23.0507	23.3522	23.568	20.9893	23.7271	25.9686	22.8755	23.3688	22.9603	NaN	S	1	414	LGSLKVLDQKQPRKQSLEPDKADHIRAAVYQ	Map9	Microtubule-associated protein 9	Q3TRR0
NaN	NaN	NaN	NaN	NaN	NaN	NaN	NaN	23.6553	23.781	23.5003	24.6578	23.7903	22.9316	24.1293	23.88	24.2924	24.2914	23.7426	NaN	22.7006	23.1721	24.5001	S	1	79	TDESLVRKKMNDFHISDDEEKNSPRLSFLKT	Map9	Microtubule-associated protein 9	Q3TRR0
NaN	NaN	NaN	NaN	NaN	NaN	NaN	NaN	NaN	24.1534	24.0836	23.7326	22.8478	NaN	NaN	NaN	NaN	23.448	24.5175	23.2869	NaN	23.1206	24.4862	S	0.999952	13	___VRSDFTSRAGGGSIEVSVPRFVVGIVIG	Fubp3		A0A0A6YVV5
NaN	NaN	NaN	NaN	NaN	NaN	NaN	NaN	24.6673	NaN	23.4693	24.3296	22.3514	NaN	24.2078	23.8774	24.1141	23.5612	24.0605	NaN	22.8798	NaN	24.2118	S	1	54	NDAGVRIQFKPDDGISPERAAQVMGPPDRCQ	Fubp3		A0A0A6YVV5
NaN	NaN	NaN	NaN	NaN	NaN	NaN	NaN	27.5948	26.5996	24.6869	25.3538	NaN	NaN	25.3861	24.9327	NaN	24.9175	26.4217	25.4159	26.4322	25.1744	26.6771	S	1	247	SLKEVEDNLKSKIVDSPEKLKNYKDKMKGTV	Nuf2	Kinetochore protein Nuf2	Q99P69
NaN	NaN	NaN	NaN	23.5162	NaN	NaN	NaN	NaN	NaN	NaN	NaN	NaN	NaN	NaN	NaN	NaN	NaN	NaN	NaN	NaN	NaN	NaN	S	0.841913	95	NQRVAMIPQKFTATMSTPDKKASQKIGFRLR	Lin9	Protein lin-9 homolog	Q8C735
NaN	NaN	NaN	NaN	NaN	NaN	NaN	NaN	26.0045	25.7104	25.8058	26.6572	25.6469	25.5919	26.1007	25.9303	25.9689	25.4227	25.0988	24.753	25.5442	24.3601	25.9835	S	1	65	AVEMPFRNSKRSRLFSDEDDRQINTKSPKRN	Lin9	Protein lin-9 homolog	Q8C735
NaN	NaN	NaN	NaN	NaN	NaN	NaN	NaN	NaN	NaN	23.5971	24.2884	23.3786	22.2724	23.7828	22.6913	23.3702	21.7858	NaN	23.5182	23.7357	23.4012	23.9833	S	0.909203	695	MSALLARRRRIAEKGSTIETEQKEDRNEDAE	Enah	Protein enabled homolog	Q03173
NaN	NaN	NaN	NaN	NaN	NaN	NaN	NaN	NaN	NaN	24.844	24.2951	25.1301	NaN	25.8894	24.1695	NaN	24.5079	24.8061	23.9626	24.04	24.8703	24.9821	S	0.972042	637	TGLAAAIAGAKLRKVSRVEDGSFPGGGNTGS	Enah	Protein enabled homolog	Q03173
NaN	NaN	NaN	NaN	NaN	NaN	NaN	NaN	NaN	NaN	NaN	23.8874	NaN	NaN	NaN	NaN	NaN	24.5397	NaN	23.9626	NaN	NaN	NaN	S	0.909411	643	IAGAKLRKVSRVEDGSFPGGGNTGSVSLASS	Enah	Protein enabled homolog	Q03173
NaN	NaN	NaN	NaN	NaN	NaN	NaN	NaN	NaN	24.3537	22.8124	22.877	24.3334	NaN	24.1153	22.8754	24.2355	23.1948	NaN	NaN	NaN	22.5362	22.8685	S	1	144	NLRCIFCGPTLPRQNSQLPAQVQNGPSQEEL	Enah	Protein enabled homolog	Q03173
NaN	NaN	NaN	NaN	NaN	NaN	NaN	NaN	NaN	26.7091	25.3943	26.1604	24.1729	24.2628	24.9426	25.1914	25.2241	25.4327	NaN	24.0243	24.2619	NaN	26.58	S	1	680	DHQEEGKEQLSEVEGSGEDDQGDDHSESAQK	Usp4	Ubiquitin carboxyl-terminal hydrolase 4;Ubiquitin carboxyl-terminal hydrolase	P35123
NaN	NaN	NaN	NaN	NaN	NaN	NaN	NaN	24.4692	22.6593	23.3104	27.2055	23.0338	NaN	24.1104	25.6383	26.2934	NaN	24.3299	22.8902	NaN	25.7449	23.6604	S	0.992691	794	GADDSTSGPEDTRAASSPNLSNGETESVKTM	Map4k4	Mitogen-activated protein kinase kinase kinase kinase 4	P97820
NaN	NaN	NaN	NaN	NaN	25.1826	25.5784	NaN	26.967	26.9052	26.8396	26.2604	26.5631	25.8491	27.0769	NaN	27.0677	26.6175	26.5828	25.0599	26.634	25.5276	26.8096	S	0.996575	795	ADDSTSGPEDTRAASSPNLSNGETESVKTMI	Map4k4	Mitogen-activated protein kinase kinase kinase kinase 4	P97820
NaN	NaN	NaN	NaN	NaN	NaN	NaN	NaN	24.3439	24.1402	NaN	NaN	NaN	NaN	NaN	NaN	NaN	NaN	NaN	22.0701	23.0499	NaN	NaN	S	0.98775	799	TSGPEDTRAASSPNLSNGETESVKTMIVHDD	Map4k4	Mitogen-activated protein kinase kinase kinase kinase 4	P97820
NaN	NaN	NaN	NaN	NaN	NaN	NaN	NaN	NaN	NaN	NaN	NaN	NaN	NaN	NaN	NaN	NaN	NaN	NaN	NaN	NaN	NaN	22.8639	S	0.896269	805	TRAASSPNLSNGETESVKTMIVHDDVESEPA	Map4k4	Mitogen-activated protein kinase kinase kinase kinase 4	P97820
25.7972	25.457	26.3686	26.5911	26.4802	26.4124	27.1653	26.9874	27.5845	NaN	27.1512	27.2263	26.7385	26.4236	26.9806	26.7755	27.069	26.9158	26.8532	26.8215	26.9574	26.5046	27.1914	S	1	629	PVRTTSRSPVLSRRDSPLQGGGQQNSQAGQR	Map4k4	Mitogen-activated protein kinase kinase kinase kinase 4	P97820
24.9679	24.619	24.8619	25.3224	25.5533	25.7566	26.2512	26.4799	27.4026	27.3801	26.7191	26.8724	26.0097	24.1748	26.0437	26.7652	26.5277	26.7233	27.2787	26.2215	26.1176	24.4329	26.2922	S	0.983007	646	LQGGGQQNSQAGQRNSTSSIEPRLLWERVEK	Map4k4	Mitogen-activated protein kinase kinase kinase kinase 4	P97820
NaN	NaN	NaN	NaN	NaN	NaN	NaN	NaN	NaN	NaN	23.1731	NaN	NaN	NaN	23.8698	NaN	NaN	NaN	24.6203	NaN	NaN	23.6397	NaN	S	0.946558	649	GGQQNSQAGQRNSTSSIEPRLLWERVEKLVP	Map4k4	Mitogen-activated protein kinase kinase kinase kinase 4	P97820
25.2641	25.56	25.512	25.5035	25.7137	25.6411	26.0181	25.5911	26.9264	26.9117	26.1393	26.0944	25.9275	27.3862	27.5599	27.5655	27.109	26.6475	26.4999	25.7161	26.4549	26.5136	25.0555	S	1	894	GLRPEAIRQDPTRKGSVVNVNPTNTRPQSDT	Map4k4	Mitogen-activated protein kinase kinase kinase kinase 4	P97820
24.155	23.6048	23.5058	NaN	24.3591	NaN	25.2649	25.0959	NaN	NaN	NaN	22.6771	NaN	NaN	22.8239	NaN	22.7078	22.6731	23.5248	21.3776	21.9654	NaN	NaN	S	0.976088	552	QWSHLASLKNNVSPVSRSHSFSDPSPKFAHH	Map4k4	Mitogen-activated protein kinase kinase kinase kinase 4	P97820
26.433	26.1114	26.0264	26.9379	26.547	26.9895	27.6724	27.7646	26.9699	26.538	26.2402	26.6269	22.7582	NaN	21.869	26.5288	26.6469	26.3903	NaN	26.0763	27.0103	26.0814	26.0693	S	0.999662	556	LASLKNNVSPVSRSHSFSDPSPKFAHHHLRS	Map4k4	Mitogen-activated protein kinase kinase kinase kinase 4	P97820
NaN	22.818	NaN	NaN	NaN	NaN	NaN	NaN	NaN	NaN	NaN	NaN	NaN	NaN	NaN	NaN	NaN	NaN	NaN	NaN	NaN	NaN	NaN	S	0.999891	561	NNVSPVSRSHSFSDPSPKFAHHHLRSQDPCP	Map4k4	Mitogen-activated protein kinase kinase kinase kinase 4	P97820
NaN	21.8935	NaN	22.5999	23.4481	23.1562	23.7762	24.0545	24.2759	23.9183	23.5933	24.0634	23.7283	23.4022	22.6994	21.9303	23.6219	23.6799	23.914	23.5698	23.7293	23.7363	24.0342	S	0.968046	836	MTPSKEGTLIVRQTQSASSTLQKHKSSSSFT	Map4k4	Mitogen-activated protein kinase kinase kinase kinase 4	P97820
NaN	NaN	NaN	NaN	NaN	NaN	NaN	NaN	NaN	NaN	NaN	NaN	NaN	NaN	NaN	NaN	24.2422	NaN	NaN	23.3189	NaN	NaN	23.8334	S	0.842398	839	SKEGTLIVRQTQSASSTLQKHKSSSSFTPFI	Map4k4	Mitogen-activated protein kinase kinase kinase kinase 4	P97820
22.9205	22.4081	NaN	24.6604	24.6242	23.9396	23.6299	24.6801	NaN	NaN	NaN	NaN	NaN	NaN	NaN	NaN	NaN	NaN	NaN	NaN	NaN	NaN	NaN	S	0.996947	701	GSQSGSGERFRVRSSSKSEGSPSPRQESAAK	Map4k4	Mitogen-activated protein kinase kinase kinase kinase 4	P97820
NaN	NaN	NaN	NaN	NaN	26.7629	NaN	NaN	NaN	NaN	NaN	NaN	NaN	NaN	NaN	22.8474	NaN	NaN	NaN	22.5189	NaN	23.2286	NaN	S	0.957257	619	ALQRPAEPQVPVRTTSRSPVLSRRDSPLQGG;SDSDEVPPRVPVRTTSRSPVLSRRDSPLQGG;YDPADRAREVPVRTTSRSPVLSRRDSPLQGG	Map4k4	Mitogen-activated protein kinase kinase kinase kinase 4	P97820
27.5144	26.4321	26.9215	27.3871	27.0992	27.6682	NaN	28.6111	26.4461	26.1656	26.2201	26.5064	26.2363	25.0532	25.8964	24.9222	25.1042	NaN	NaN	26.0505	26.4582	24.8865	25.424	S	0.997932	621	PADRAREVPVRTTSRSPVLSRRDSPLQGGGQ;QRPAEPQVPVRTTSRSPVLSRRDSPLQGGGQ;SDEVPPRVPVRTTSRSPVLSRRDSPLQGGGQ	Map4k4	Mitogen-activated protein kinase kinase kinase kinase 4	P97820
NaN	NaN	NaN	NaN	NaN	NaN	NaN	NaN	23.379	23.7928	24.0217	24.4394	23.9249	NaN	23.5624	24.1237	24.2183	24.2468	22.7161	23.116	23.694	23.0127	25.6361	S	0.999751	588	LTDENKEHEADTANMSDKELKKLRNKQRRAQ	Naa15	N-alpha-acetyltransferase 15, NatA auxiliary subunit	Q80UM3
23.492	NaN	NaN	NaN	NaN	23.9353	NaN	24.2476	NaN	NaN	NaN	NaN	NaN	NaN	NaN	NaN	NaN	NaN	NaN	NaN	NaN	NaN	NaN	S	0.876852	854	PPGYEEDMKITVNGDSSAETEELANEI____	Naa15	N-alpha-acetyltransferase 15, NatA auxiliary subunit	Q80UM3
NaN	NaN	24.9039	23.6946	24.2997	NaN	NaN	NaN	26.1152	NaN	NaN	21.7382	27.2922	23.0596	27.3318	27.0093	26.2281	25.9742	NaN	24.887	NaN	26.2176	26.1393	S	0.962307	855	PGYEEDMKITVNGDSSAETEELANEI_____	Naa15	N-alpha-acetyltransferase 15, NatA auxiliary subunit	Q80UM3
NaN	NaN	NaN	NaN	NaN	NaN	NaN	NaN	NaN	24.7556	24.4652	24.7353	24.5435	24.4608	24.6481	23.3229	NaN	NaN	NaN	24.3768	23.969	23.7873	24.907	S	0.999873	1046	PEVSPANGLNRLPTPSPEPPPSVVRFAVPPG	Ptch1	Protein patched homolog 1	A0A0A6YWC4
23.1156	23.268	22.8864	23.316	23.517	23.2445	23.0627	NaN	24.6159	24.3149	23.0106	23.7915	24.3886	24.1271	24.5733	24.1499	24.3713	24.0354	24.1322	23.8719	23.8334	24.4456	24.3512	S	1	1079	RKKVPVKDLPPFGINSPQALKKILSLSEEGS	Rapgef2	Rap guanine nucleotide exchange factor 2	Q8CHG7
24.567	24.459	24.6116	24.6738	24.7374	24.5489	25.2525	25.4424	NaN	25.3122	26.159	26.4424	25.4414	26.9658	25.9289	27.0074	26.0076	25.1226	26.7516	26.4029	24.5831	25.77	26.9165	S	0.967275	585	KHIPAALPVSGTLSSSNPDLLQSHHRILDFS	Rapgef2	Rap guanine nucleotide exchange factor 2	Q8CHG7
NaN	NaN	NaN	NaN	NaN	NaN	NaN	NaN	NaN	23.5702	22.0366	NaN	NaN	NaN	NaN	21.9668	21.7439	NaN	NaN	NaN	21.1086	21.8487	22.4312	S	0.999281	1088	PPFGINSPQALKKILSLSEEGSLERHRKQAE	Rapgef2	Rap guanine nucleotide exchange factor 2	Q8CHG7
NaN	NaN	NaN	NaN	NaN	NaN	NaN	NaN	NaN	24.43	NaN	NaN	NaN	NaN	NaN	NaN	NaN	NaN	NaN	NaN	NaN	NaN	NaN	S	0.901098	1090	FGINSPQALKKILSLSEEGSLERHRKQAEDT	Rapgef2	Rap guanine nucleotide exchange factor 2	Q8CHG7
NaN	NaN	NaN	NaN	NaN	NaN	NaN	NaN	24.2749	NaN	24.5439	24.4256	24.7486	24.0594	24.5331	24.1638	24.393	24.1848	24.1812	24.0041	22.7197	23.5572	NaN	S	0.999989	1094	SPQALKKILSLSEEGSLERHRKQAEDTISNA	Rapgef2	Rap guanine nucleotide exchange factor 2	Q8CHG7
26.9693	26.8023	26.6796	27.4377	27.059	27.3518	27.7495	NaN	27.1869	26.4217	26.2958	26.2331	26.4272	26.1105	26.1347	26.4723	26.8623	27.0292	26.6249	25.6026	26.8392	26.9845	26.9984	S	0.999776	1022	LPKNPGDKKPVKSETSPVAPRAGPQQKVQPQ	Rapgef2	Rap guanine nucleotide exchange factor 2	Q8CHG7
25.5095	25.5481	21.7673	20.986	26.1565	26.4089	26.9552	26.9895	27.8199	27.0274	26.6395	27.2571	26.3687	27.0677	26.1345	27.2499	27.5238	26.2851	27.0162	26.3104	27.496	27.0245	26.2376	S	0.851458	960	DVAQTGGHKKRVRRSSFLNAKKLYEDAQMAR	Rapgef2	Rap guanine nucleotide exchange factor 2	Q8CHG7
NaN	NaN	NaN	NaN	NaN	NaN	NaN	NaN	NaN	NaN	NaN	25.4301	NaN	25.338	NaN	NaN	23.465	24.9422	NaN	NaN	23.5181	23.386	NaN	S	0.976024	930	MDPALMFRTRKKKWRSLGSLSQGSANATVLD	Rapgef2	Rap guanine nucleotide exchange factor 2	Q8CHG7
NaN	NaN	NaN	NaN	NaN	NaN	NaN	NaN	25.7851	NaN	24.6939	23.9936	NaN	NaN	NaN	25.1309	23.6323	NaN	NaN	23.4505	23.033	NaN	NaN	S	0.907972	933	ALMFRTRKKKWRSLGSLSQGSANATVLDVAQ	Rapgef2	Rap guanine nucleotide exchange factor 2	Q8CHG7
23.0768	23.5696	22.8796	23.8068	24.1827	23.9625	NaN	24.8306	NaN	NaN	NaN	NaN	NaN	NaN	NaN	NaN	NaN	NaN	NaN	NaN	NaN	NaN	NaN	S	1	233	IPPYMIASKEAVREGSPANWKRKEKLPQVTR	Actl6a	Actin-like protein 6A	Q9Z2N8
23.2352	22.8593	23.1295	23.6652	24.6763	24.3589	24.9562	24.6869	26.5682	25.4881	24.208	25.3993	24.4002	NaN	22.4844	25.5098	24.2544	25.4532	25.7612	25.2473	22.2376	24.4482	25.8019	S	0.913916	134	VLKLVMMFEGKANESSPKPAGPPPERDIASL	Aif1l	Allograft inflammatory factor 1-like	Q9EQX4
NaN	NaN	NaN	NaN	NaN	NaN	NaN	NaN	25.345	24.3412	25.0281	24.739	23.8695	24.833	24.5984	24.2665	23.4137	23.4427	24.4709	23.8471	24.791	21.5843	23.9389	S	0.999946	567	DLHLVKKLSALLRAKSPRPDSFETEIKELIL	Rab3gap2	Rab3 GTPase-activating protein non-catalytic subunit	A0A0A6YWM5
NaN	NaN	23.8635	23.418	22.9754	NaN	NaN	23.5744	25.984	25.3521	25.4011	25.1462	25.4859	24.872	24.1123	23.9827	25.3262	25.3606	25.0667	25.5872	24.4718	23.349	25.6806	S	1	449	IVEDLHERVPEKGGFSPFGNTQGPSRVAQFL	Rab3gap2	Rab3 GTPase-activating protein non-catalytic subunit	A0A0A6YWM5
NaN	NaN	23.6526	NaN	NaN	23.6083	NaN	NaN	24.9044	24.5318	24.8982	25.1409	23.4725	24.3009	24.9292	24.8168	24.9797	24.7271	NaN	23.9465	24.7081	23.5264	24.5593	S	0.95679	824	SPQTPQDKLTANETQSASSTLQKHKSSSSFT	Map4k4		B2RUE8
23.8724	23.8344	19.5518	25.7677	25.9883	25.5476	25.6647	25.5414	NaN	NaN	NaN	NaN	NaN	NaN	NaN	NaN	NaN	NaN	NaN	NaN	NaN	NaN	NaN	S	0.999991	766	GTLIVRQSTVDQKRASHHESNGFAGRIHLLP	Map4k4		B2RUE8
NaN	NaN	NaN	NaN	NaN	NaN	NaN	NaN	NaN	NaN	21.0157	23.159	20.9358	22.7316	22.8755	21.5108	21.2205	22.2561	NaN	22.4266	23.0262	22.9817	24.0728	S	1	385	FNEFMTSKPKIHCFRSLKRGLSLKLGVTPED;FNEFMTSKPKIHCFRSLKRGTQSLCYHKELM	Fnbp1	Formin-binding protein 1	Q80TY0
24.3766	24.9473	24.9125	24.9925	25.1526	25.9082	26.0271	26.0683	26.6139	26.3901	26.5691	26.1042	24.9977	25.9398	25.0195	25.8842	24.2503	25.553	26.9882	25.3535	24.8179	22.9163	25.2898	S	0.999999	496	VEGRLPARSEQARRQSGLYDGQTHQTVTNCA	Fnbp1	Formin-binding protein 1	Q80TY0
28.7714	28.1281	28.7935	28.7644	29.1223	29.1844	29.5562	29.6186	29.1859	29.1167	29.3439	29.4724	28.8799	27.9514	28.943	28.3882	29.1071	29.3613	28.3034	28.3236	29.2933	29.6394	29.5098	S	0.999992	296	DIEFEDYTQPMKRTVSDNSLSSSKEGKPELR	Fnbp1	Formin-binding protein 1	Q80TY0
NaN	NaN	NaN	NaN	NaN	NaN	NaN	NaN	23.859	NaN	24.0496	NaN	23.9519	NaN	23.5961	23.6984	23.2919	24.1338	24.2328	NaN	23.6588	24.4826	24.1107	S	0.999934	299	FEDYTQPMKRTVSDNSLSSSKEGKPELRFGG	Fnbp1	Formin-binding protein 1	Q80TY0
NaN	NaN	NaN	NaN	NaN	NaN	NaN	NaN	25.317	25.6785	25.766	25.3882	25.593	25.4682	24.6646	25.6241	24.9501	25.2743	25.3964	NaN	NaN	NaN	25.3866	S	0.999105	119	ILDPSNTEISTPRPSSPSRFPEEDSVLFNKL	Rabgap1l	Rab GTPase-activating protein 1-like	A6H6A9
NaN	22.7461	NaN	NaN	24.2011	22.7133	22.2502	23.8434	23.6175	NaN	NaN	21.5195	20.8182	NaN	21.5108	21.834	21.8686	NaN	23.2828	NaN	NaN	22.0114	NaN	S	0.985108	809	RFDWGPAPPTTFKPNSPDLAKHYKSASPQPA	Pcdh9		A0A0A6YY37
22.7349	22.9387	22.827	NaN	23.7914	23.6117	24.1105	24.2013	NaN	25.7916	24.3317	NaN	25.4778	NaN	NaN	20.1258	24.1216	24.5949	24.5194	22.2106	23.4431	24.746	23.8409	S	0.968255	1177	NGVPLLWIKEPHLNYSPTCLEPPVLSIHPGA	Igsf3	Immunoglobulin superfamily member 3	Q6ZQA6
29.0015	28.6489	28.8346	28.776	28.6553	28.6299	28.8831	28.9773	29.8739	30.2668	30.3332	29.693	29.9878	29.8013	30.1796	30.4382	30.0811	30.281	29.9428	29.4583	29.3265	29.0159	29.8273	S	1	96	ADLEVPVPSKFTRRVSVCAETFNPDEEEEDN	Prkar2a	cAMP-dependent protein kinase type II-alpha regulatory subunit	P12367
21.6897	21.7289	22.0603	22.063	22.2882	21.9423	22.2193	22.0315	23.5881	22.8329	22.0215	22.5377	22.708	22.7692	22.8074	22.6211	22.624	22.2808	22.7102	21.2632	21.4692	22.6	23.2251	S	1	2	______________MSMEDPFFVVKGEVQKA	Stx6	Syntaxin-6	Q9JKK1
25.0804	25.8084	26.1191	25.5084	25.7481	26.2675	25.9926	25.7691	27.2569	25.3308	26.2065	24.5248	24.9637	25.8653	26.3557	26.0017	26.671	26.4401	26.436	25.6549	25.4367	26.7949	26.3564	S	1	1776	RVENGGEKAGLAAPESPVRKSPSEYKLEGRS	Mast4	Microtubule-associated serine/threonine-protein kinase 4	Q811L6
25.8412	25.6281	26.0625	26.0335	25.8913	25.8262	26.1351	25.7667	NaN	27.0779	26.7332	26.8495	26.5773	26.9357	27.5312	26.8321	27.1398	25.603	26.9893	26.7694	26.6531	27.1033	26.7823	S	0.999867	2549	DPQVPIASGHRGRALSVTAATGEPKGRELAQ	Mast4	Microtubule-associated serine/threonine-protein kinase 4	Q811L6
23.8869	23.0369	23.8611	NaN	NaN	25.4298	25.7863	26.0441	NaN	NaN	25.3419	25.9548	25.2578	25.0401	25.9373	25.8805	26.0465	25.4325	26.3408	23.2829	NaN	26.4259	26.0906	S	0.998818	2206	HSDCSSHKARPGPDPSPSKSKHQDRSLSSQK	Mast4	Microtubule-associated serine/threonine-protein kinase 4	Q811L6
NaN	NaN	NaN	NaN	NaN	NaN	NaN	NaN	26.278	NaN	26.8786	25.8199	25.5936	25.3457	26.2709	25.99	26.6826	26.2563	26.6403	25.2131	25.2641	26.5887	26.0698	S	0.991792	1124	SPHSLSSDPSSSRDSSPSRDSSAASASPHQP	Mast4	Microtubule-associated serine/threonine-protein kinase 4	Q811L6
25.205	25.5816	NaN	NaN	21.7683	NaN	NaN	NaN	26.8495	27.7438	27.4326	27.3095	27.4173	28.4837	27.9449	28.0129	28.1673	27.8323	26.9037	26.663	26.2332	26.5556	27.9354	S	1	1465	PSYGSDKKLLCSRKHSLEVTQEEVQREQCQR	Mast4	Microtubule-associated serine/threonine-protein kinase 4	Q811L6
24.1458	23.9482	23.849	24.0928	23.8514	24.3689	24.6808	24.5039	23.6168	23.5902	23.3093	23.5861	24.0248	23.3917	22.6978	22.9527	23.6758	23.3268	23.4487	22.7512	22.469	24.1019	24.5939	S	0.999999	1417	LGNAKITQAFPSKMHSPPTIVRHIVRPKSAE	Mast4	Microtubule-associated serine/threonine-protein kinase 4	Q811L6
23.7105	24.7445	24.1242	24.1261	23.7721	24.1579	23.968	23.8738	25.9023	24.6858	25.6802	25.369	25.3611	25.2495	25.1346	25.0611	24.9512	25.091	24.6513	23.9027	24.8814	25.1852	24.8994	S	0.999962	264	SAHAGNSPQDSPRNFSPSASAHFSFARRTDG	Mast4	Microtubule-associated serine/threonine-protein kinase 4	Q811L6
NaN	NaN	NaN	NaN	NaN	NaN	NaN	NaN	26.5816	NaN	24.1705	23.4039	24.6664	24.5111	24.5154	24.3977	21.5539	24.3944	23.8263	NaN	NaN	NaN	24.2711	S	0.999489	255	ALPRPHSPLSAHAGNSPQDSPRNFSPSASAH	Mast4	Microtubule-associated serine/threonine-protein kinase 4	Q811L6
25.9299	25.8535	26.7883	26.5738	26.6306	26.623	26.5885	26.7657	25.1038	NaN	29.216	29.6193	28.6481	29.1748	29.7427	29.2485	29.0289	29.3672	29.5905	28.4376	28.9093	28.7818	27.8956	S	1	1521	GCLKRPVSRKVGRQESVDDLDRDKLKAKVVV	Mast4	Microtubule-associated serine/threonine-protein kinase 4	Q811L6
NaN	NaN	NaN	NaN	NaN	NaN	NaN	NaN	NaN	23.3701	22.0569	22.7891	21.5702	22.6433	22.527	23.8794	22.8518	21.7654	25.0792	22.9236	22.9646	24.2471	NaN	S	0.975919	2353	STVKDYPSLCRQTDRSPSHQATTGDRKAEGK	Mast4	Microtubule-associated serine/threonine-protein kinase 4	Q811L6
26.2462	26.1986	26.179	26.2219	26.1802	26.5304	26.9728	26.5087	26.392	26.5884	25.9139	26.1948	25.825	26.6613	26.7131	26.935	26.5772	26.5047	NaN	25.5112	25.4592	26.5702	26.5235	S	0.999977	1368	APKLSGQRYRSGRRKSAGSIPLSPLARTPSP	Mast4	Microtubule-associated serine/threonine-protein kinase 4	Q811L6
NaN	NaN	NaN	NaN	NaN	NaN	NaN	NaN	NaN	23.2166	23.8259	24.0872	23.7733	23.0691	23.6605	22.176	NaN	22.0548	NaN	23.2645	23.6507	23.7921	22.8366	S	0.999931	1375	RYRSGRRKSAGSIPLSPLARTPSPTPQPTSP	Mast4	Microtubule-associated serine/threonine-protein kinase 4	Q811L6
NaN	NaN	NaN	NaN	NaN	NaN	NaN	NaN	23.5644	21.6677	22.6835	23.3356	22.0253	22.6972	23.2392	21.3601	23.0196	22.8067	NaN	21.5646	23.6538	24.2231	23.2045	S	1	1430	LHLSPPLGRQLSRPKSAEPPRSPLLKRVQSA;MHSPPTIVRHIVRPKSAEPPRSPLLKRVQSE	Mast4;Mast1;Mast2	Microtubule-associated serine/threonine-protein kinase 4;Microtubule-associated serine/threonine-protein kinase 1;Microtubule-associated serine/threonine-protein kinase 2	Q811L6
24.0649	23.6472	23.5469	23.5579	23.4697	23.9568	24.0593	24.4089	25.71	25.7831	25.531	25.8581	25.3075	25.0055	25.5544	25.0472	25.7802	25.5663	25.3624	25.3941	26.3929	25.8719	25.3016	S	1	1436	IVRHIVRPKSAEPPRSPLLKRVQSEEKLSPS;LGRQLSRPKSAEPPRSPLLKRVQSAEKLAAA	Mast4;Mast1;Mast2	Microtubule-associated serine/threonine-protein kinase 4;Microtubule-associated serine/threonine-protein kinase 1;Microtubule-associated serine/threonine-protein kinase 2	Q811L6
23.8339	23.9682	23.9066	23.7002	23.9965	23.8657	23.6812	24.1141	24.1942	24.384	24.1803	24.622	24.3688	23.8506	24.554	24.3245	24.424	24.0219	24.0618	23.9294	23.9274	24.528	24.7348	S	0.999951	2517	LQSGGDGRSQMIKSDSLPSFRLSTSALESHF	Mast4	Microtubule-associated serine/threonine-protein kinase 4	Q811L6
24.8203	NaN	24.6856	24.2376	24.9665	24.6837	24.1694	24.8359	25.7125	25.6965	25.9153	25.9471	25.5677	25.3555	25.4563	25.7564	24.5683	24.6691	25.7227	24.9914	25.4922	25.6515	26.1611	S	0.996859	1290	LLHTSRSFSCLNRSLSSGESLPGSPTHSLSP	Mast4	Microtubule-associated serine/threonine-protein kinase 4	Q811L6
23.1795	22.9368	NaN	NaN	NaN	23.0147	NaN	NaN	NaN	23.1683	23.394	22.6828	23.0628	23.273	23.648	23.5083	22.5672	23.2098	23.7486	22.3982	21.9649	23.2635	23.5088	S	0.999847	1395	TPSPTPQPTSPQRSPSPLLGHSLGNAKITQA	Mast4	Microtubule-associated serine/threonine-protein kinase 4	Q811L6
21.6706	21.9135	NaN	NaN	NaN	22.1722	23.7675	NaN	NaN	22.6999	22.8865	23.2481	20.6849	21.6277	22.356	NaN	23.112	23.2431	NaN	NaN	22.4178	23.4609	22.2009	S	0.997335	1382	KSAGSIPLSPLARTPSPTPQPTSPQRSPSPL	Mast4	Microtubule-associated serine/threonine-protein kinase 4	Q811L6
22.1216	20.8713	NaN	22.5045	22.9759	21.4574	21.6919	22.7545	NaN	26.7186	22.9013	25.9691	26.0778	26.2292	25.5316	24.9859	27.6572	25.4348	26.7827	NaN	NaN	28.1912	26.3002	S	0.999999	254	NGYLNGYTPSRKRQASESSSRPH________	Uck2	Uridine-cytidine kinase 2	Q99PM9
NaN	NaN	NaN	NaN	NaN	NaN	NaN	NaN	25.4542	25.5436	24.9827	25.3965	24.7389	24.3828	25.2616	24.5674	24.8805	24.7204	24.7953	24.2715	24.3472	23.9362	24.9944	S	1	60	KENREAKLDGPTENISEDEAQSSSQRKRGWR	Larp1b;Larp2		Q3TQS1
23.2646	22.5452	23.4486	23.8895	23.8092	24.0427	23.9778	24.9183	NaN	NaN	NaN	NaN	NaN	NaN	NaN	NaN	NaN	NaN	NaN	NaN	NaN	NaN	NaN	S	0.999998	348	TANVTAEFKETRRRLSVEIYDKFQRATSVKR	Kcnk2	Potassium channel subfamily K member 2	P97438
NaN	NaN	NaN	NaN	NaN	23.8126	23.4044	23.1689	23.457	22.2375	NaN	NaN	NaN	NaN	21.2798	21.8804	22.6045	22.9917	NaN	19.2374	NaN	NaN	NaN	S	0.994917	979	GVDVSVGSQHEDRKDSPISPHFTRNSDENSS	Lrba	Lipopolysaccharide-responsive and beige-like anchor protein	Q9ESE1
NaN	NaN	NaN	NaN	NaN	NaN	NaN	NaN	NaN	23.9629	24.2515	24.0782	NaN	23.3958	NaN	NaN	23.2625	NaN	NaN	23.9817	24.7101	24.5706	26.0698	S	0.999866	770	PGAKGKDMEEGKAAFSKDESKEPIVEVRTEE	Ncam1	Neural cell adhesion molecule 1	P13595
29.3485	29.2565	29.8766	29.6102	29.5985	29.2542	29.6111	29.502	30.6129	29.5421	29.6359	30.1425	29.9005	29.9795	30.2469	29.7988	29.1452	29.3928	29.8561	29.1066	29.8548	29.7643	29.377	S	1	774	GKDMEEGKAAFSKDESKEPIVEVRTEEERTP	Ncam1	Neural cell adhesion molecule 1	P13595
NaN	NaN	NaN	NaN	NaN	NaN	NaN	NaN	NaN	24.1414	24.4773	NaN	22.6347	NaN	NaN	23.2014	24.7875	NaN	NaN	23.8469	23.7253	23.6315	NaN	S	0.991743	1084	PPAPAKTEKGPVETKSEPPESEAKPAPTEVK;TTPLTEPEKGPVETKSEPPESEAKPAPTEVK	Ncam1	Neural cell adhesion molecule 1	P13595
NaN	NaN	NaN	NaN	NaN	NaN	NaN	NaN	NaN	26.1613	24.6244	25.7659	25.5467	24.5529	25.538	25.4176	24.2254	24.8301	23.6038	24.0744	22.9171	23.2978	23.5366	S	0.989523	270	ENEEEDDEKHIFSDDSSELTIRNVDKNDEAE	Ncam1	Neural cell adhesion molecule 1	P13595
24.2532	23.3944	24.0623	23.7923	23.5685	24.1739	24.1152	NaN	24.8732	NaN	NaN	25.7186	25.5933	25.6606	25.2744	25.234	24.713	25.6562	24.8924	NaN	NaN	NaN	26.1816	S	0.998779	441	SEDAKKGPNPLMRRNSVTPLASPEPTKKPRI	Pfkfb3		A0A0A6YY64
23.6096	23.8847	25.1969	23.5328	23.7346	23.9197	24.4214	24.2708	26.953	27.6686	27.6267	27.7334	27.6738	27.0605	27.9903	27.6034	27.8253	27.5096	27.0829	26.7659	26.989	27.3157	27.8043	S	1	1120	PPEKADVSVEKLDGESDKEQFDDDQKVCCGF	Camsap2	Calmodulin-regulated spectrin-associated protein 2	Q8C1B1
NaN	NaN	NaN	NaN	NaN	NaN	NaN	NaN	NaN	24.8438	24.5646	25.0472	25.0504	24.6812	25.503	24.9253	24.34	21.3429	24.7685	20.6246	24.829	23.3702	24.7974	S	0.999999	647	LQDYDLRASNPREALSPCPSTISTKSQPGSS	Camsap2	Calmodulin-regulated spectrin-associated protein 2	Q8C1B1
NaN	NaN	NaN	NaN	NaN	NaN	NaN	NaN	24.8859	23.9309	NaN	NaN	NaN	NaN	NaN	NaN	NaN	NaN	NaN	NaN	NaN	NaN	NaN	S	1	784	RTAFLTVVKKKGEGISPLREEAAGAEDEKVY	Camsap2	Calmodulin-regulated spectrin-associated protein 2	Q8C1B1
NaN	NaN	NaN	NaN	NaN	NaN	NaN	NaN	NaN	NaN	26.2213	NaN	NaN	NaN	NaN	NaN	NaN	NaN	NaN	NaN	NaN	NaN	NaN	S	0.777063	572	GQDLSILNSNIKLNQSSPDNLTDTKGALSPI	Camsap2	Calmodulin-regulated spectrin-associated protein 2	Q8C1B1
24.8984	NaN	24.4922	24.1635	23.9279	24.5666	24.7526	24.8902	27.891	27.4074	26.1883	27.7479	27.1109	26.8244	27.8145	27.017	27.4005	27.0386	27.1849	26.6573	27.1759	27.3106	27.387	S	0.999983	573	QDLSILNSNIKLNQSSPDNLTDTKGALSPIT	Camsap2	Calmodulin-regulated spectrin-associated protein 2	Q8C1B1
24.1189	24.4716	24.55	24.34	24.7159	24.8478	24.6281	24.6737	25.9862	25.6298	25.164	25.7579	25.8657	25.5501	26.1239	25.5118	26.0897	25.7541	24.9944	25.1029	25.3296	25.7793	25.6016	S	0.995344	992	TPPRSVDSLPRLRRFSPSQVPIQTRSFVCFG	Camsap2	Calmodulin-regulated spectrin-associated protein 2	Q8C1B1
NaN	NaN	NaN	NaN	NaN	NaN	NaN	NaN	24.2448	NaN	21.3541	NaN	NaN	NaN	21.7002	22.8508	22.6583	23.8125	NaN	NaN	NaN	NaN	24.5676	S	0.99977	1285	DSESVHSGKRTPRSESVEGFLSPSRCGSRNG	Camsap2	Calmodulin-regulated spectrin-associated protein 2	Q8C1B1
NaN	NaN	NaN	NaN	NaN	NaN	NaN	NaN	24.0207	24.8956	24.7823	25.2141	NaN	NaN	24.0103	25.0702	24.2306	25.1318	NaN	23.6489	23.7963	23.8533	NaN	S	0.966469	1291	SGKRTPRSESVEGFLSPSRCGSRNGEKDWEN	Camsap2	Calmodulin-regulated spectrin-associated protein 2	Q8C1B1
23.5074	23.0219	24.5155	25.1086	25.5342	25.3015	25.7777	25.9417	21.7861	24.4257	24.2802	22.3017	24.1315	21.0249	23.2342	24.08	22.9586	24.0659	24.198	23.772	23.0545	24.5286	22.9676	S	1	1240	KPRPQAAKQKKQRPKSIHRDHIESPKTPIKG	Camsap2	Calmodulin-regulated spectrin-associated protein 2	Q8C1B1
NaN	NaN	NaN	NaN	NaN	NaN	NaN	NaN	24.856	NaN	25.2634	26.4886	26.0431	25.0579	25.2748	25.9307	24.8033	25.9666	24.188	24.4564	24.2049	24.0728	26.7937	S	0.959397	836	DIKESMETPPGRWLKSPTTPVDPERQWNLTS	Camsap2	Calmodulin-regulated spectrin-associated protein 2	Q8C1B1
25.127	24.1301	24.78	24.6709	25.1851	25.2887	25.2491	25.8197	26.7507	26.7869	26.673	27.1046	26.5776	26.1772	26.6602	26.5476	26.8387	26.664	26.7838	26.4648	26.604	25.8858	26.7771	S	1	439	SAQSSTPNRGIIRSVSNEGLTLNNSRASKHI	Camsap2	Calmodulin-regulated spectrin-associated protein 2	Q8C1B1
26.1165	25.6382	25.9506	26.5823	26.8425	27.0584	27.599	27.62	26.8326	26.0393	26.3705	26.2022	26.1281	25.5606	25.9745	26.1019	26.2526	26.4496	26.2006	25.8801	26.5111	26.3219	26.3433	S	0.999376	974	PNGQRYDSVNEKLSDSPSMGRYRSVNGGPGS	Pcdh7		E9Q2S0
25.3346	25.4928	25.7429	25.4878	25.8104	25.8555	25.6396	26.023	27.1489	28.3168	28.3064	28.2085	26.6976	26.4744	NaN	26.8543	26.7163	26.4793	26.8571	27.5718	28.1277	28.5666	26.6738	S	1	1177	SQPKLSTFMPVDERGSQEKLANGEAAIMGDR	Pcdh7		E9Q2S0
NaN	23.7865	NaN	24.1062	24.0845	23.4814	23.5897	24.1502	24.6607	24.9081	24.8132	25.1834	24.5973	23.4485	24.5307	23.7925	24.2638	24.1605	24.1657	24.6238	23.5368	24.1423	24.5837	S	0.974062	1011	YKSSSPLPTVQLHPQSPTAGKKHQAVQDLPP	Pcdh7		E9Q2S0
27.4879	27.1569	27.2947	26.9327	26.8301	27.3598	27.9241	27.7435	28.0851	28.1369	27.6673	28.8278	28.1102	27.4318	28.6871	27.946	28.5098	28.5538	27.9413	27.8975	28.1428	27.7552	28.5609	S	1	989	SPSMGRYRSVNGGPGSPDLARHYKSSSPLPT	Pcdh7		E9Q2S0
22.6629	23.0203	22.9385	21.9513	22.4118	23.1851	23.1894	22.655	NaN	NaN	NaN	NaN	NaN	NaN	NaN	NaN	NaN	NaN	NaN	NaN	NaN	NaN	NaN	S	0.891685	1235	NPEDIPLTKTGEYKPSPVNTLTRREVYL___	Pcdh7		E9Q2S0
NaN	NaN	NaN	NaN	NaN	NaN	NaN	NaN	25.6417	NaN	NaN	25.1775	25.3492	25.4061	25.5538	25.6998	25.9264	25.7109	25.315	24.5906	24.7561	24.4381	25.7668	S	1	192	IERYELLQEPGGGGGSGEGRRLGPADSAPYP	Pcdh7		E9Q2S0
NaN	NaN	23.1308	22.3139	23.3329	23.1275	23.7556	23.865	NaN	25.6315	25.0882	25.0963	24.3112	23.9989	NaN	24.5548	23.5591	24.1139	NaN	24.2908	23.9774	24.4403	23.6259	S	1	224	PPRFKINKKIPRGPPSPPAPVMHSPSRKMTV	Snw1	SNW domain-containing protein 1	Q9CSN1
NaN	NaN	NaN	NaN	NaN	NaN	NaN	NaN	24.6399	NaN	24.0425	23.8828	24.3734	NaN	24.6372	NaN	23.8011	NaN	NaN	NaN	24.7469	NaN	23.2492	S	0.935914	797	RRSPASSGSVAPQPSSPPSPAQAEPEPRAEE	Ighmbp2	DNA-binding protein SMUBP-2	P40694
NaN	NaN	NaN	NaN	NaN	NaN	NaN	NaN	NaN	NaN	25.0529	25.5612	23.9981	NaN	NaN	24.309	23.9927	24.9049	NaN	24.6774	23.7799	25.0888	23.9615	S	0.999224	800	PASSGSVAPQPSSPPSPAQAEPEPRAEEPVT	Ighmbp2	DNA-binding protein SMUBP-2	P40694
NaN	23.2467	23.7066	NaN	NaN	23.5224	23.7192	NaN	NaN	22.9206	22.6621	22.0323	23.3971	22.757	22.0379	22.4747	22.7989	22.2654	23.1845	21.9695	NaN	23.2363	NaN	S	0.999994	390	RARFISTKDSTSSARSPLIFLASRRSNSSSR	Gpr39	G-protein coupled receptor 39	Q5U431
24.3205	24.7509	24.1867	24.7479	24.621	24.8375	24.8882	24.8993	23.5724	23.5819	23.9668	23.2879	23.1475	23.9875	23.9471	23.8322	23.5548	23.6441	23.9103	23.0214	22.5009	23.6628	23.9067	S	1	397	KDSTSSARSPLIFLASRRSNSSSRRTNKVFL	Gpr39	G-protein coupled receptor 39	Q5U431
NaN	NaN	NaN	NaN	NaN	NaN	NaN	NaN	NaN	NaN	NaN	22.2072	NaN	22.465	23.5987	NaN	NaN	NaN	24.3275	NaN	NaN	NaN	23.4354	S	0.759934	274	CSRAEKGVARVVNITSPTHDGSSRSPTTTAP	Elf2	ETS-related transcription factor Elf-2	A0A0B4J1G5
NaN	NaN	NaN	NaN	NaN	NaN	NaN	NaN	25.1378	24.2951	23.946	25.5008	23.2231	NaN	24.556	23.2991	24.5086	23.3922	NaN	NaN	23.4833	23.4447	NaN	S	0.827747	283	RVVNITSPTHDGSSRSPTTTAPVSAAAAPRT	Elf2	ETS-related transcription factor Elf-2	A0A0B4J1G5
22.4312	22.776	22.6699	23.2234	23.5929	22.9872	23.4911	23.8618	NaN	NaN	20.5434	22.6933	NaN	NaN	NaN	NaN	NaN	NaN	NaN	NaN	23.0294	22.6349	NaN	S	0.999999	59	FFQNPELYIRESVKGSLDRKKLEQLYTRYKD	Dcun1d1	DCN1-like protein 1;DCN1-like protein	Q9QZ73
NaN	NaN	NaN	NaN	NaN	NaN	NaN	NaN	24.9963	24.4994	NaN	22.4515	NaN	NaN	23.5075	NaN	NaN	NaN	NaN	NaN	21.8544	NaN	NaN	S	0.999945	10	______MKAGSGDQGSPPCFLRFPRPVRVVS	Obsl1	Obscurin-like protein 1	D3YYU8
25.6033	25.9937	26.0889	25.5259	25.7515	25.9506	26.0024	26.0916	28.4398	28.1217	27.7395	27.5343	27.7601	27.3853	27.4444	27.9062	27.812	26.5057	NaN	24.6257	26.1835	27.4999	27.6753	S	1	617	VKAAEQMSTLPIDAPSPLENLEQKETPGSQP	Map4	Microtubule-associated protein;Microtubule-associated protein 4	A0A0B4J1M9
23.192	23.5209	23.4763	23.7841	22.7294	23.379	24.1812	23.8679	25.8945	NaN	22.3013	23.5598	23.1703	23.7842	23.6378	24.0005	22.6661	22.5499	NaN	22.4677	23.9592	24.1608	NaN	S	1	231	TLQPATELSKAAEVESVKEQLPAKALETMAE	Map4	Microtubule-associated protein;Microtubule-associated protein 4	A0A0B4J1M9
23.0488	22.3319	22.3226	23.8252	23.0045	NaN	24.2137	24.4789	24.8678	25.2532	24.3593	25.0053	24.4103	24.3485	25.6244	25.0745	25.5077	25.3621	24.7647	24.9463	25.1355	24.782	25.0961	S	0.999965	953	TAGKPEPNAVTKAAGSIASAQKPPAGKVQIV	Map4	Microtubule-associated protein;Microtubule-associated protein 4	A0A0B4J1M9
24.7903	24.7123	24.9651	24.9221	25.1471	24.6664	25.4579	25.4192	27.2258	27.6274	27.5745	27.7807	27.1782	26.3015	27.4965	27.2815	27.5908	27.1774	27.0818	26.7777	27.4503	27.1948	27.2888	S	1	667	TGNDITTPPNKEPPPSPEKKAKPLATTQPAK	Map4	Microtubule-associated protein;Microtubule-associated protein 4;Uncharacterized protein C3orf20 homolog	A0A0B4J1M9
23.6083	23.4175	23.7644	24.0001	24.6649	24.1901	24.4018	25.4353	25.6341	NaN	25.2838	25.3083	24.6559	24.6764	25.1389	24.6905	24.9926	23.8561	23.756	NaN	22.4709	24.975	24.5748	S	1	5	___________MADLSLVDALTEPPPEIEGE	Map4	Microtubule-associated protein;Microtubule-associated protein 4	A0A0B4J1M9
25.7729	25.5746	26.2048	25.8822	25.4738	25.8593	26.1794	25.637	28.2558	27.8881	28.113	28.1645	27.8448	27.626	27.8632	27.9151	28.0421	27.9299	27.7712	27.798	27.4253	27.5712	27.7621	S	0.991023	254	KALETMAEQTTDVVHSPSTDTTPGPDTEAAL	Map4	Microtubule-associated protein;Microtubule-associated protein 4	A0A0B4J1M9
28.8559	28.9081	28.9358	28.4212	28.8518	28.7422	29.361	29.3735	31.5371	31.327	31.1529	31.2864	30.9788	30.8126	31.3133	31.042	31.1342	30.8924	31.4384	30.8173	30.9146	31.0857	31.0919	S	0.999726	785	LKPGPKTTPTVSKATSPSTLVSTGPSSRSPA	Map4	Microtubule-associated protein;Microtubule-associated protein 4	A0A0B4J1M9
25.039	25.6111	24.7286	25.0228	25.3791	25.2065	26.2247	26.5172	NaN	25.055	23.7869	24.6801	24.3349	NaN	23.9233	19.8875	23.2656	23.5081	NaN	23.2822	23.6324	23.2705	24.864	S	0.999888	798	ATSPSTLVSTGPSSRSPATTLPKRPTSIKTE	Map4	Microtubule-associated protein;Microtubule-associated protein 4	A0A0B4J1M9
28.7211	28.5688	29.3071	28.8435	28.2887	28.7618	29.0734	29.006	30.4827	30.272	30.4516	30.7632	30.3279	30.0743	30.4301	30.4597	30.3196	30.4154	30.3676	29.9423	30.0816	30.3007	30.4216	S	1	475	TAPPTETNLGMAKDMSPLPESEVTLGKDVVI	Map4	Microtubule-associated protein;Microtubule-associated protein 4	A0A0B4J1M9
28.3238	28.0344	29.5909	28.0616	27.1983	28.0801	28.7706	28.707	30.0318	30.792	30.8317	31.2399	30.7586	29.9008	31.0609	30.6788	30.9354	30.8815	30.0437	30.4272	30.6932	30.6682	31.01	S	0.999998	517	VTPLSEEEVTSVKDMSPSAETEAPLAKNADL	Map4	Microtubule-associated protein;Microtubule-associated protein 4	A0A0B4J1M9
NaN	23.1919	NaN	NaN	NaN	NaN	NaN	NaN	NaN	24.5746	24.3165	25.3723	23.086	23.7737	25.1085	NaN	NaN	NaN	23.7384	23.5066	23.2662	23.466	23.9388	S	0.914006	519	PLSEEEVTSVKDMSPSAETEAPLAKNADLHS	Map4	Microtubule-associated protein;Microtubule-associated protein 4	A0A0B4J1M9
24.4247	24.5406	23.9183	24.2022	NaN	NaN	23.9833	24.5755	25.8191	NaN	NaN	NaN	NaN	NaN	NaN	NaN	NaN	NaN	NaN	NaN	NaN	NaN	NaN	S	0.983643	449	LPLEAERPLVTDMTPSLETEMTLGKETAPPT	Map4	Microtubule-associated protein;Microtubule-associated protein 4	A0A0B4J1M9
21.9452	22.1609	22.4318	21.6277	21.8868	22.4558	22.3361	22.1942	22.2229	23.3655	23.4607	24.028	23.2191	23.2427	23.3264	21.7302	21.2816	NaN	NaN	21.6303	21.8208	23.2175	23.0854	S	0.999872	381	LLTKETELAPAKGMVSLSEIEEALAKNDESS	Map4	Microtubule-associated protein;Microtubule-associated protein 4	A0A0B4J1M9
27.3988	27.5873	27.4751	27.649	27.4835	27.5699	28.2255	28.2333	29.9589	29.5429	29.2616	29.7232	29.1897	28.9552	28.6944	29.3456	29.7087	29.393	29.6739	28.9304	29.377	29.2841	29.3834	S	0.99904	598	SMQHKGQSTVPPCTASPEPVKAAEQMSTLPI	Map4	Microtubule-associated protein;Microtubule-associated protein 4	A0A0B4J1M9
22.8363	21.8995	22.7973	23.3627	23.4869	23.4162	NaN	23.4595	23.577	NaN	21.4546	NaN	22.8488	NaN	23.9866	NaN	NaN	NaN	NaN	NaN	NaN	NaN	NaN	S	0.983619	973	QKPPAGKVQIVSKKVSYSHIQSKCGSKDNIK	Map4	Microtubule-associated protein;Microtubule-associated protein 4	A0A0B4J1M9
NaN	27.8731	27.6635	27.862	NaN	NaN	NaN	NaN	29.0978	NaN	27.7401	28.0483	29.0225	28.8852	29.2894	28.9194	29.1414	28.8579	28.9056	28.6765	28.4705	27.6527	29.2703	S	0.999673	901	PSSSAPRVSRLATTVSAPDLKSVRSKAKVEK;PSSSAPRVSRLATTVSAPDLKSVRSKVGSTE	Map4	Microtubule-associated protein;Microtubule-associated protein 4	A0A0B4J1M9
NaN	NaN	NaN	NaN	NaN	NaN	NaN	NaN	23.449	NaN	25.4681	NaN	23.898	23.8135	24.7865	24.0398	23.4677	24.6879	23.5047	NaN	21.4545	NaN	24.6138	S	0.993524	99	LANGDHGMEGNNTAGSPTDFLEERVDYPDYQ	Map4	Microtubule-associated protein;Microtubule-associated protein 4	A0A0B4J1M9
23.8881	23.8138	26.0333	24.4075	24.5845	25.2942	25.3109	25.3961	26.248	27.938	25.7321	27.4659	27.6972	26.372	28.0114	27.4114	27.0971	28.2451	25.3038	26.9974	26.4488	27.2414	28.9589	S	0.880439	760	KPKPITEAKVAEKRTSPSKPSSAPALKPGPK	Map4	Microtubule-associated protein;Microtubule-associated protein 4	A0A0B4J1M9
23.3476	22.784	22.941	23.2337	23.6772	23.2203	23.7017	24.0769	25.7647	NaN	NaN	NaN	23.1292	NaN	23.5481	24.6118	25.0573	25.022	24.9214	NaN	23.5437	23.2817	25.3384	S	0.999882	828	EGKPADVKRMTAKSASADLSRSKTTSASSVK	Map4	Microtubule-associated protein;Microtubule-associated protein 4	A0A0B4J1M9
30.6108	30.2019	29.9937	30.6378	30.4568	31.1288	31.5107	31.1633	31.8668	30.9215	30.7073	31.1376	31.0962	30.9287	30.3202	30.7447	30.9057	30.7177	30.8956	31.119	30.3465	31.4336	31.0839	S	0.998045	914	TVSAPDLKSVRSKVGSTENIKHQPGGGRAKV;TVSAPDLKSVRSKVGSTENIKHQPGGGRVQI	Map4	Microtubule-associated protein;Microtubule-associated protein 4	A0A0B4J1M9
NaN	NaN	NaN	NaN	NaN	NaN	NaN	NaN	24.4502	24.3224	23.1471	24.9603	24.5529	24.0768	25.2161	24.0588	24.4013	22.1941	NaN	23.021	23.6419	23.6402	24.8557	S	0.976035	871	GMTSTRVKPMSAPSRSSGALSVDKKPTSTKP	Map4	Microtubule-associated protein;Microtubule-associated protein 4	A0A0B4J1M9
26.1812	26.6882	26.9427	26.6751	26.2055	26.764	27.2356	26.6651	28.0434	28.4858	28.4368	28.5125	28.3032	27.9573	28.2865	28.1669	28.187	27.9539	27.8913	27.0411	27.6808	28.3434	28.5093	S	0.999941	506	LPETKVAEFNNVTPLSEEEVTSVKDMSPSAE	Map4	Microtubule-associated protein;Microtubule-associated protein 4	A0A0B4J1M9
NaN	NaN	23.9087	NaN	22.3182	NaN	22.5496	22.3835	25.034	27.6872	27.2732	26.9488	26.5467	25.807	26.6657	26.2574	26.1969	26.2385	24.542	21.2903	25.5664	24.9373	27.6337	S	0.992359	512	AEFNNVTPLSEEEVTSVKDMSPSAETEAPLA	Map4	Microtubule-associated protein;Microtubule-associated protein 4	A0A0B4J1M9
29.3916	29.4099	29.2733	29.5184	29.1545	29.5209	29.6826	29.7396	29.9244	30.4975	30.9077	31.1564	30.3564	30.6303	30.8462	30.6494	30.67	30.8254	30.5995	30.2446	30.2541	30.7983	30.9121	S	1	1046	SQKLNFKEKAQAKVGSLDNVGHLPAGGAVKT	Map4	Microtubule-associated protein;Microtubule-associated protein 4	A0A0B4J1M9
NaN	NaN	NaN	NaN	NaN	NaN	NaN	NaN	23.4868	NaN	23.3492	21.944	22.988	NaN	23.1423	23.4734	23.4788	23.0753	NaN	NaN	20.4102	NaN	23.9247	S	1	26	SKGGYLQGNMSGRLPSMGDQEPPGQEKVVLK	Slc7a11	Cystine/glutamate transporter	Q9WTR6
NaN	NaN	NaN	NaN	NaN	NaN	NaN	NaN	27.5737	NaN	24.9499	26.8185	25.7384	NaN	26.8819	25.4021	26.3717	NaN	NaN	25.021	25.6603	20.5929	NaN	S	0.81837	720	STTGTGTSQTRALRSSESGM___________	Adgre5;Cd97	CD97 antigen	A0A0D9SEG8
NaN	NaN	NaN	NaN	NaN	NaN	NaN	NaN	NaN	NaN	NaN	23.3434	NaN	22.7074	23.0553	NaN	22.8622	22.6009	23.8647	NaN	22.5036	22.7917	22.8378	S	0.791235	705	WACMVTGSKYTEFNSSTTGTGTSQTRALRSS	Adgre5;Cd97	CD97 antigen	A0A0D9SEG8
NaN	NaN	NaN	NaN	NaN	NaN	NaN	NaN	25.465	24.4572	24.3472	24.5385	23.0822	23.952	25.0015	24.9291	24.0409	23.4845	24.6578	23.0329	24.3676	24.4412	24.6098	S	0.875872	712	SKYTEFNSSTTGTGTSQTRALRSSESGM___	Adgre5;Cd97	CD97 antigen	A0A0D9SEG8
23.5173	23.5915	23.7493	24.3705	24.8138	25.2248	25.3476	25.1249	24.8186	24.1691	23.7551	NaN	23.8705	24.0623	25.1363	24.545	19.7883	24.7809	25.0972	NaN	NaN	24.8291	25.6031	S	1	80	EEPDKEGKEKPHVGVSPRGVKRQRRASSGGS	Rsbn1	Round spermatid basic protein 1	Q80T69
NaN	NaN	NaN	NaN	NaN	NaN	NaN	NaN	26.0284	24.1051	23.8993	25.2374	24.7333	24.0433	25.3551	24.4516	24.9418	24.9364	25.7182	25.2355	25.8822	25.9116	25.6368	S	0.988214	495	VSHPPPEARPLSRKSSPSSPAVRDLVERHQA	BC037034	Uncharacterized protein C7orf43 homolog	Q3UTZ3
26.2725	NaN	NaN	26.8706	27.0257	NaN	27.0869	27.0385	24.0501	NaN	23.4931	NaN	22.9631	NaN	24.8962	24.6678	24.5547	23.283	24.1381	NaN	25.1471	23.5398	NaN	S	0.999817	517	RDLVERHQASLGRSQSFSHQQPSRSHLMRSG	BC037034	Uncharacterized protein C7orf43 homolog	Q3UTZ3
NaN	NaN	NaN	NaN	NaN	NaN	NaN	NaN	NaN	NaN	NaN	24.5759	24.5627	23.3117	24.3596	24.0225	NaN	22.7782	23.414	NaN	23.2778	23.228	NaN	S	0.988908	33	KADYHDGVQVVDCGLSLNDTAFEKMIISELV	Adgrl2;Lphn2	Latrophilin-2	Q0P6A0
21.2633	22.0344	22.1447	22.1028	21.598	NaN	NaN	21.8755	24.8919	24.7763	24.7493	24.2428	23.3396	NaN	23.8841	23.0134	22.2893	23.5106	NaN	22.7917	NaN	22.4817	NaN	S	0.959711	154	ADDHLQSPNRDSLYTSMPNLRDSPYPESSPD	Adgrl2;Lphn2	Latrophilin-2	Q0P6A0
25.3568	25.4833	25.1599	25.3701	25.044	24.9639	25.3275	25.4603	27.7967	27.2262	27.247	26.3376	27.1422	27.1087	27.6849	27.2332	27.1697	27.0312	22.2708	26.2864	26.9105	26.1568	27.8271	S	1	210	AGRHLHMCYQISRGNSDGYIIPINKEGCIPE	Adgrl2;Lphn2	Latrophilin-2	Q0P6A0
24.5633	24.4992	25.7181	24.6475	23.7569	23.8177	24.3272	24.86	26.2474	25.5516	25.7343	26.7696	25.4713	25.3187	26.8187	26.0714	26.3635	25.6823	25.6718	25.3899	25.9363	26.3563	26.3166	S	1	189	LSPSRRSENEDIYYKSMPNLGAGRHLHMCYQ	Adgrl2;Lphn2	Latrophilin-2	Q0P6A0
NaN	NaN	NaN	NaN	NaN	NaN	NaN	NaN	NaN	NaN	21.6626	23.2907	NaN	23.409	21.9349	NaN	NaN	NaN	NaN	NaN	21.7887	NaN	NaN	S	0.995728	114	RHKELEAPLIPQRTHSLLYQPQKKVKPEATD	Adgrl2;Lphn2	Latrophilin-2	Q0P6A0
NaN	NaN	NaN	NaN	NaN	NaN	NaN	NaN	NaN	NaN	23.1127	22.8168	23.0973	NaN	23.1235	NaN	22.4207	NaN	NaN	NaN	NaN	23.4013	22.886	S	0.999911	180	REDGEKQMEKEELDVSVREEEVSCSGPLSQK	Anapc5	Anaphase-promoting complex subunit 5	Q8BTZ4
22.8051	22.8908	23.2437	22.7836	23.3381	23.0181	22.9812	23.1175	25.4186	24.8336	24.3593	23.541	24.9551	24.1569	24.8837	25.3876	NaN	23.9276	25.8392	24.1694	23.8164	22.4011	25.2365	S	1	222	GAGTSAGNGYGNPRNSPGLLVSPGNLNKNIQ	Mef2c	Myocyte-specific enhancer factor 2C	Q8CFN5
NaN	NaN	NaN	NaN	NaN	NaN	NaN	NaN	NaN	NaN	22.1844	21.0938	NaN	22.5297	23.1487	NaN	22.1883	21.7603	NaN	21.7121	21.3847	23.3139	20.348	S	0.999737	396	SLPSTQSLSIKSEPVSPPRDRTTTPSRYPQH	Mef2c	Myocyte-specific enhancer factor 2C	Q8CFN5
NaN	NaN	NaN	NaN	NaN	NaN	NaN	NaN	NaN	NaN	NaN	NaN	20.9889	NaN	22.571	NaN	NaN	NaN	23.2877	23.7579	NaN	NaN	NaN	S	1	354	NMRIQDLKVSLKPLHSVNNPILRKRKLLGTK	Mapkapk5	MAP kinase-activated protein kinase 5	O54992
NaN	NaN	NaN	NaN	NaN	NaN	NaN	NaN	24.5889	25.2052	24.7174	25.0531	24.9249	NaN	24.8498	24.544	24.7692	22.8715	24.0711	23.2531	24.4504	24.7869	24.0272	S	0.796354	75	AAPAAGGPGPAPAASSPPPAPGPAALPPALL			A0A0G2JDV2
NaN	NaN	NaN	NaN	NaN	NaN	NaN	NaN	NaN	NaN	25.0639	25.2876	25.3333	25.6862	25.6859	24.5108	25.5156	26.0195	25.6104	24.3761	24.7417	NaN	NaN	S	0.999542	170	AAHAHPGPRGSTPAGSPPQHQFHPGRRKREN			A0A0G2JDV2
24.2439	24.2574	24.1053	23.6991	23.711	23.7301	24.2773	24.4567	NaN	26.2027	25.0048	NaN	25.1533	NaN	NaN	NaN	NaN	NaN	NaN	25.1526	25.2154	NaN	NaN	S	1	552	YRRWIKEKWGSRILPSPDLDNRIKIKERITT	Papd7	Non-canonical poly(A) RNA polymerase PAPD7	A0A0G2JDV2
NaN	NaN	NaN	NaN	NaN	NaN	NaN	NaN	NaN	NaN	NaN	26.0488	NaN	NaN	NaN	NaN	NaN	NaN	NaN	NaN	NaN	NaN	26.1957	S	0.764493	357	PSISQRELRIETIAASSTPTPIRKQSKRRSN	Agap3	Arf-GAP with GTPase, ANK repeat and PH domain-containing protein 3	Q8VHH5
26.3977	26.3154	NaN	25.8827	26.3101	26.1511	26.5011	26.6714	29.2097	28.6728	28.7739	28.7394	28.4884	28.2724	28.643	28.6532	28.6469	27.983	28.7746	28.4473	28.5997	28.8477	28.5412	S	1	11	_____MPLAKDLLHPSPEEEKRKHKKKRLVQ	Rps27	40S ribosomal protein S27	Q6ZWU9
23.4274	23.9021	NaN	23.4389	23.3294	NaN	NaN	NaN	25.1509	25.2597	24.6521	24.4917	24.4074	NaN	24.8347	24.8662	24.8739	24.5598	25.3793	24.7876	24.4788	25.1382	24.9116	S	1	78	LCQPTGGKARLTEGCSFRRKQH_________	Rps27;Rps27l	40S ribosomal protein S27;40S ribosomal protein S27-like	Q6ZWU9
NaN	NaN	NaN	NaN	NaN	NaN	NaN	NaN	23.5228	NaN	22.1216	23.6968	22.0252	23.5523	22.5232	22.4126	NaN	23.2341	22.9771	NaN	22.4964	NaN	22.2821	S	0.998833	27	LEEEKKKHKKKRLVQSPNSYFMDVKCPGCYK;PEEEKRKHKKKRLVQSPNSYFMDVKCPGCYK	Rps27;Rps27l	40S ribosomal protein S27;40S ribosomal protein S27-like	Q6ZWU9
NaN	NaN	NaN	NaN	NaN	NaN	NaN	NaN	NaN	24.0912	NaN	NaN	23.4092	23.7566	23.3667	23.024	23.0802	23.9386	NaN	NaN	NaN	NaN	23.5788	S	0.997559	19	STKYEVAAQHEADDGSALGDGASPVAEQVKL	Slc7a7	Y+L amino acid transporter 1	Q9Z1K8
NaN	NaN	NaN	NaN	NaN	NaN	NaN	NaN	NaN	NaN	NaN	23.3582	NaN	NaN	22.9384	NaN	NaN	21.1182	23.8709	NaN	22.4672	NaN	NaN	S	0.921654	47	HRTTVQRSKSSSLTSSPEAARRARPRPSDKL	Pacrgl	PACRG-like protein	Q9D3X5
25.5056	24.9424	24.8497	25.5087	24.9704	25.4024	25.6642	25.6647	27.24	26.8269	26.2058	25.6949	25.8459	25.6081	26.2618	25.7037	25.7191	25.4375	26.293	25.042	25.3284	24.6357	26.0037	S	1	39	DIHSINPAQLMARIESYEGREKKGISDVRRT	Stard3nl	MLN64 N-terminal domain homolog	Q9DCI3
25.2206	24.7675	24.6285	24.6135	24.7653	25.0286	25.2758	24.9802	26.9131	26.8197	26.8913	27.1972	26.8132	26.7969	27.0694	26.4318	26.1442	25.7818	26.8437	26.2874	26.4418	26.1957	26.7746	S	1	193	QEAEEENRLLLVQDASERAALIPAGLSDGQF	Stard3nl	MLN64 N-terminal domain homolog	Q9DCI3
23.4165	NaN	23.274	23.8236	24.2768	23.8015	24.2426	24.5659	24.6144	NaN	21.8927	23.4257	20.8108	NaN	NaN	22.7502	23.6935	24.0984	23.6416	23.8861	NaN	NaN	23.2292	S	0.879529	146	LCVVDGVRDLWHRRSSPEPDGGATPKAAEPA	Sh2b2	SH2B adapter protein 2	Q9JID9
24.6918	23.991	24.7562	25.2714	25.5319	25.4023	26.2932	26.3123	26.0271	25.521	23.6568	25.5419	25.4759	25.0203	25.9896	25.1455	25.1255	24.8172	25.7334	24.5201	24.0328	23.3436	26.284	S	0.963526	106	SVTSALKTATYGHSRSSEDVSAHAATKARVR	Sh2b2	SH2B adapter protein 2	Q9JID9
NaN	NaN	NaN	NaN	NaN	NaN	NaN	NaN	NaN	24.0625	24.0742	NaN	NaN	22.5257	23.8003	21.5963	23.2973	24.2074	24.6977	NaN	22.8532	NaN	NaN	S	0.99454	82	ENWKKELEKHREKLLSGNESSSKKRQKKKKE	Fam133b	Protein FAM133B	Q9CVI2
22.3098	NaN	23.003	NaN	23.6316	23.5179	23.1386	23.7868	NaN	23.4903	23.5097	23.1983	NaN	NaN	NaN	NaN	NaN	NaN	NaN	23.3207	24.9951	25.1137	NaN	S	1	15	_MVDYYEVLGVQRHASPEDIKKAYRKQALKW	Dnajb6	DnaJ homolog subfamily B member 6	O54946
23.3565	23.8807	24.9721	23.7067	24.1996	23.0368	23.0895	24.8271	25.1865	27.9347	26.3795	27.2443	25.7382	24.5375	26.8046	25.7661	25.7021	25.1165	24.3952	25.3663	25.5635	24.7827	27.245	S	0.997271	359	RSAAAFKPVGSTSVKSPSWQRPNQAAPSTGR	Pdlim5	PDZ and LIM domain protein 5	Q8CI51
24.774	25.0129	25.1869	25.2886	25.3237	25.34	25.3567	25.2638	27.5659	27.0011	26.8094	27.5313	26.931	26.5218	27.4466	27.329	27.3131	25.9986	NaN	26.3282	26.536	26.977	26.0334	S	0.995363	11	_____MAEACEPTRPSEDEDEEREPLLPRVA	Pi4k2b	Phosphatidylinositol 4-kinase type 2-beta	Q8CBQ5
NaN	NaN	NaN	NaN	NaN	NaN	NaN	NaN	NaN	NaN	NaN	NaN	NaN	NaN	24.6571	23.1348	NaN	NaN	NaN	NaN	20.8602	NaN	NaN	S	0.938316	695	GIDLTAPSNNSSPRDSPCKENKIKKRKGEEI	Sbno1	Protein strawberry notch homolog 1	Q689Z5
NaN	NaN	NaN	NaN	NaN	NaN	NaN	NaN	25.469	23.7806	23.9394	24.2934	24.5563	24.2739	24.767	24.862	24.7829	24.6339	24.0737	23.8295	22.3351	24.3478	24.4848	S	1	18	TPGSGRKRTPVKDRFSAEDEALSNIAREAEA	Lrrfip2	Leucine-rich repeat flightless-interacting protein 2	A0A0G2JEP4
26.8295	26.5976	27.0415	26.1604	26.6926	26.4419	26.7542	26.8322	26.9318	27.7104	27.6947	27.2437	27.0908	NaN	27.3242	26.6338	25.7984	26.0856	25.8599	NaN	24.579	27.0585	26.7972	S	0.999817	96	ASATTPLSGNSSRRGSGDTSSLIDPDTSLSE			A0A0G2JEP4
NaN	NaN	NaN	NaN	NaN	NaN	NaN	NaN	26.9326	NaN	NaN	NaN	NaN	26.5368	NaN	NaN	NaN	NaN	NaN	25.48	NaN	NaN	25.9594	S	0.823462	88	TRPSSRNSASATTPLSGNSSRRGSGDTSSLI	Lrrfip2		A0A0G2JEP4
NaN	NaN	NaN	NaN	NaN	NaN	NaN	NaN	NaN	27.9611	26.4003	27.848	26.5265	NaN	21.8909	NaN	26.6701	26.7918	NaN	NaN	26.0263	NaN	NaN	S	0.840914	92	SRNSASATTPLSGNSSRRGSGDTSSLIDPDT	Lrrfip2		A0A0G2JEP4
NaN	NaN	22.2104	22.2881	22.66	22.5307	23.2361	23.2895	24.6462	24.8041	24.2738	NaN	24.2575	NaN	24.5732	24.4343	23.5482	24.0305	NaN	22.9888	23.1861	24.6249	NaN	S	0.972715	373	GLKKGLNFKSVNPVLSPTQFVKDSMGHVGQQ	Aspm	Abnormal spindle-like microcephaly-associated protein homolog	Q8CJ27
NaN	NaN	NaN	NaN	NaN	NaN	NaN	NaN	27.6096	NaN	24.765	27.2929	NaN	26.2545	25.9578	25.2966	NaN	25.9408	27.0619	26.4915	26.2969	NaN	26.9121	S	0.999904	15	_MGPRRKPQTPRRRPSSPAPGPSRQSSSVGS	Cenpa	Histone H3-like centromeric protein A	O35216
NaN	NaN	21.5811	22.9618	NaN	NaN	23.9418	23.8488	NaN	NaN	25.6419	25.8882	24.1189	NaN	NaN	24.6281	NaN	NaN	NaN	25.3057	25.8192	25.5559	NaN	S	0.99981	16	MGPRRKPQTPRRRPSSPAPGPSRQSSSVGSQ	Cenpa	Histone H3-like centromeric protein A	O35216
22.7687	21.1263	22.1376	21.5178	22.8578	22.5898	22.5994	21.5234	NaN	NaN	NaN	NaN	NaN	NaN	NaN	NaN	NaN	NaN	NaN	NaN	NaN	NaN	NaN	S	0.867915	23	HAEGTRLSPFLIAPPSPISHTEPLAVKLQNG	Tet2	Methylcytosine dioxygenase TET2	Q4JK59
NaN	NaN	NaN	NaN	NaN	NaN	NaN	NaN	26.0253	NaN	NaN	22.2393	24.612	NaN	25.1453	25.4793	25.0825	25.8365	25.569	NaN	21.885	26.6184	NaN	S	0.999947	76	GIRAHTESCSCSLQQSPHADNTTPGAPARKI	Pde5a	cGMP-specific 3',5'-cyclic phosphodiesterase	Q8CG03
NaN	NaN	NaN	NaN	NaN	NaN	NaN	NaN	23.3897	23.25	22.0539	22.1587	23.4296	23.3488	22.9696	23.2198	22.3209	22.3384	23.1859	22.9428	22.899	22.139	23.8073	S	1	407	SSSKDLTNNNIPHLLSPKEAKSKTEFDFNID	Cdkl5	Cyclin-dependent kinase-like 5	Q3UTQ8
NaN	NaN	NaN	NaN	NaN	NaN	NaN	NaN	22.317	21.8838	20.2952	22.4096	21.8528	NaN	21.0985	22.1965	20.642	NaN	NaN	21.9414	20.992	22.1128	23.4077	S	0.866286	306	CLNHPTFQTQRLLDRSPSRSTKRKPYHVESS	Cdkl5	Cyclin-dependent kinase-like 5	Q3UTQ8
NaN	NaN	NaN	NaN	NaN	NaN	NaN	NaN	25.001	NaN	NaN	NaN	24.1683	NaN	24.5747	NaN	NaN	NaN	24.7074	NaN	NaN	NaN	23.7337	S	0.999233	720	NDPVPRRVGSFYRVPSPRPDNSFHENNVSTR	Cdkl5	Cyclin-dependent kinase-like 5	Q3UTQ8
NaN	NaN	NaN	NaN	NaN	NaN	NaN	NaN	NaN	NaN	22.6269	23.0387	22.2714	NaN	22.7295	NaN	22.3813	22.3619	23.5324	22.4188	NaN	22.6025	23.5186	S	0.999588	111	KPTDENVNEKAATENSENDITMQSLPKEDGL;KPTDENVNEKAATENSENDITMQSLPKGTVI	Atrx	Transcriptional regulator ATRX	Q61687
24.3219	24.5203	25.7575	25.8878	25.9928	25.7381	26.2945	26.5839	28.5411	27.4421	26.2151	25.5115	26.5335	25.4385	26.4575	26.2896	25.9515	26.5972	26.9555	26.8257	26.3761	27.2289	25.1542	S	0.999997	84	EKSRSSGSSRSKRKPSIVTKYVESDDEKPTD	Atrx	Transcriptional regulator ATRX	Q61687
26.4006	26.497	26.9014	27.7354	28.3102	28.0969	28.3485	28.3307	26.6938	26.0228	26.3266	27.5333	26.9723	26.2434	27.638	26.3428	26.2728	27.4597	27.7323	26.7322	27.8965	27.7798	27.8462	S	0.999981	315	DSEKTSKVCDQTSKFSPKKSSSSCNGEEKKL	Atrx	Transcriptional regulator ATRX	Q61687
27.0744	26.5507	26.8901	27.2243	27.3485	27.8069	27.8343	27.7167	27.7844	27.3141	27.4232	28.097	27.023	26.8709	27.5726	27.2978	27.3946	27.1683	27.5927	26.6683	27.353	27.4587	27.6254	S	1	92	SRSKRKPSIVTKYVESDDEKPTDENVNEKAA	Atrx	Transcriptional regulator ATRX	Q61687
22.1666	22.22	22.3193	22.265	21.8777	22.1435	22.4068	22.6678	24.1157	NaN	21.6747	22.7561	NaN	NaN	22.5416	21.9848	21.8523	18.8411	22.4464	21.4445	22.5428	21.6725	NaN	S	0.9973	266	ATSHLKSSVGTGRAVSPSSLKGTPGDSTAHK			A0A0G2JFH2
NaN	NaN	NaN	NaN	NaN	NaN	NaN	NaN	NaN	26.1205	25.8184	25.8154	25.5679	25.3623	25.8329	NaN	NaN	NaN	25.0679	24.1493	23.2436	24.2348	24.7969	S	0.998886	500	RSMLREKFPEFCSSPSPPVEVKIEEPVSMEM	Ints3	Integrator complex subunit 3	Q7TPD0
26.1889	26.6102	25.9436	26.2167	25.1488	25.1564	25.6556	25.7963	28.1321	27.6703	27.8083	28.499	27.2035	27.1242	27.8456	27.3573	27.4595	27.2507	27.908	26.6241	27.2171	26.2913	27.7799	S	0.986597	166	DLFKGDQLMNRQEFSSEEMTKSLETKSLEVT	Vcam1	Vascular cell adhesion protein 1	P29533
NaN	NaN	NaN	NaN	NaN	NaN	NaN	NaN	NaN	24.2643	23.0604	23.5545	NaN	23.8949	24.8875	23.2876	23.8366	23.768	NaN	22.3491	NaN	23.3473	23.7817	S	0.951048	32	KRKAAAEEPQEAAAASDGTAESGVQPAKAAA	Rpf1	Ribosome production factor 1	Q7TND5
NaN	NaN	24.0334	24.7391	24.3527	23.4751	NaN	24.7389	NaN	NaN	NaN	NaN	NaN	NaN	NaN	NaN	NaN	NaN	NaN	NaN	NaN	NaN	NaN	S	0.998354	53	RGADREDEAGPSEPDSPVAAPFFLLYPGDGG			Q9D394-2
24.9689	24.6236	24.8005	25.2874	24.6351	24.9422	25.4268	25.8146	25.9769	25.0202	25.0905	24.1731	25.0631	22.8282	25.2307	20.5166	23.9747	23.5101	25.5949	23.9807	NaN	23.1979	25.2716	S	1	27	ESCGEEQERGGERRPSEPLEPRGASARGADR			Q9D394-2
23.3628	23.7106	23.4996	24.1656	24.1077	24.0748	24.6094	23.9474	26.3909	26.9255	25.8162	26.2128	26.3372	26.2953	25.2479	25.1506	24.374	25.7392	NaN	24.0887	24.8424	NaN	24.2053	S	0.999117	133	ASATTPLSGNSSRRGSGDTSSLIDPDTSLSE	Lrrfip2	Leucine-rich repeat flightless-interacting protein 2	A0A0G2JFV5
24.267	24.005	23.8135	23.8141	24.2955	23.2814	24.7737	24.6539	NaN	26.7166	NaN	25.0507	25.7812	25.8741	25.2827	NaN	NaN	NaN	NaN	24.0329	24.1061	23.3125	NaN	S	0.98706	927	VRALLDSSENCDRLSSPPGLFGAFNIRGNEP	Rprd2	Regulation of nuclear pre-mRNA domain-containing protein 2	Q6NXI6
24.9629	25.104	25.0611	25.0222	25.2659	25.2093	25.3	25.2395	27.0715	26.7158	26.8529	26.8778	26.7234	26.6065	27.249	25.1235	25.5611	25.2364	25.7121	26.3776	26.2973	26.4964	25.3583	S	1	633	SEVSSTSASKASVGQSPVLPSTTFKLPSSSL	Rprd2	Regulation of nuclear pre-mRNA domain-containing protein 2	Q6NXI6
NaN	NaN	NaN	NaN	NaN	NaN	NaN	NaN	NaN	25.3792	23.9433	23.814	24.1716	24.0784	24.2604	24.4671	24.0588	24.1548	NaN	NaN	NaN	NaN	23.2349	S	0.845837	504	TGVSSASRPSPGIPTSPSNLSSGLKTPAPAT	Rprd2	Regulation of nuclear pre-mRNA domain-containing protein 2	Q6NXI6
NaN	NaN	NaN	NaN	NaN	NaN	NaN	NaN	NaN	NaN	20.2747	NaN	NaN	NaN	22.3513	NaN	NaN	NaN	NaN	NaN	20.4543	NaN	21.9818	S	0.867519	457	TAAPPLPKPLSTALLSPSPTLVLPNLANVDL	Rprd2	Regulation of nuclear pre-mRNA domain-containing protein 2	Q6NXI6
23.1891	22.2695	25.0217	22.779	NaN	NaN	22.4372	23.2618	24.9534	26.5175	26.1229	26.4454	26.3405	25.3079	26.0347	25.133	25.4441	24.6179	23.1203	23.9646	25.3685	22.0401	26.2414	S	0.994171	459	APPLPKPLSTALLSPSPTLVLPNLANVDLAK	Rprd2	Regulation of nuclear pre-mRNA domain-containing protein 2	Q6NXI6
21.5413	20.918	21.9062	22.0428	22.426	22.9527	NaN	23.7832	25.8123	24.945	25.0445	NaN	24.5987	24.7501	25.6932	25.1253	25.0045	25.4229	26.3023	24.452	25.225	25.3273	25.1716	S	1	1117	PIETLGYHNAANRRMSGEPIKTVESIRVPGK	Rprd2	Regulation of nuclear pre-mRNA domain-containing protein 2	Q6NXI6
NaN	NaN	NaN	NaN	NaN	NaN	NaN	NaN	24.8003	NaN	NaN	20.705	NaN	24.551	24.1286	NaN	23.4561	22.7644	23.8387	20.5508	NaN	NaN	24.0595	S	0.997935	193	SDSSVLTRSGDCIRHSNTLEQTAERDSGLGA	Tsc22d2		E9Q7M2
23.0221	23.1815	23.8556	22.7055	23.3142	23.1651	23.3386	23.0948	22.3533	27.489	26.8755	26.2139	26.3759	26.3957	26.4832	26.4033	NaN	25.8832	25.8687	24.841	23.7459	24.2434	27.2162	S	1	587	QTQPLVGQVDDTRRKSEPLPQAPLSLIAESK	Tsc22d2		E9Q7M2
NaN	NaN	NaN	NaN	NaN	NaN	NaN	NaN	24.1728	NaN	NaN	NaN	NaN	NaN	NaN	NaN	20.9794	NaN	NaN	NaN	NaN	21.4534	NaN	S	0.758053	175	YISNTFNPAKPDAEDSDGSIASWELRVEGKL	Smarcd3	SWI/SNF-related matrix-associated actin-dependent regulator of chromatin subfamily D member 3	Q6P9Z1
24.4953	24.5893	24.8591	24.9681	24.7558	24.6517	NaN	25.2127	NaN	NaN	NaN	NaN	NaN	NaN	NaN	NaN	NaN	NaN	NaN	NaN	NaN	NaN	NaN	S	0.999992	49	PRGEHLTIEFENLVESDEGESPGSSHRPLTE	Ap1ar		E9PYF7
NaN	NaN	NaN	NaN	NaN	NaN	NaN	NaN	24.1193	23.4433	23.8568	23.6603	23.5685	22.5493	22.6989	23.7731	23.4645	23.0929	24.0098	23.6705	23.467	22.1039	23.9001	S	0.999988	249	TQQDSHNPLRDSRGGSFEMTDDDSAIRALTQ	Dhx30	Putative ATP-dependent RNA helicase DHX30	Q99PU8
NaN	NaN	NaN	NaN	NaN	NaN	NaN	NaN	24.1473	23.6523	22.8826	23.5789	23.188	23.2173	24.328	23.4696	23.8505	23.6719	23.4715	22.8875	23.435	23.5774	23.7802	S	0.94547	164	NWSVNVKTTSASRAVSSLATAKGGPSEVREN	Dclk1	Serine/threonine-protein kinase DCLK1	Q80VB6
NaN	NaN	NaN	NaN	NaN	NaN	NaN	NaN	19.5391	NaN	NaN	24.2302	25.8813	26.2888	24.8373	25.3806	25.1547	25.5354	27.9572	25.4686	NaN	24.9861	NaN	S	0.991185	298	SYTKIASASRRGTTKSPGPSRRSKSPASTSS	Dclk1	Serine/threonine-protein kinase DCLK1	Q80VB6
24.9704	24.9038	21.0295	25.5951	26.4682	26.3675	26.9174	26.4683	28.1634	NaN	27.0538	27.6128	28.0229	27.2309	27.7534	26.9064	28.2591	28.1146	27.8127	27.547	28.0798	28.0719	26.8198	S	0.942499	352	SPGSLRKQRISQHGGSSTSLSSTKVCSSMDE	Dclk1	Serine/threonine-protein kinase DCLK1	A0A0G2JGQ6
NaN	NaN	NaN	NaN	NaN	NaN	NaN	NaN	NaN	NaN	NaN	NaN	NaN	NaN	NaN	NaN	NaN	NaN	NaN	NaN	NaN	NaN	22.3801	S	0.915158	355	SLRKQRISQHGGSSTSLSSTKVCSSMDENDG	Dclk1	Serine/threonine-protein kinase DCLK1	A0A0G2JGQ6
23.3802	NaN	NaN	NaN	23.9697	23.7155	23.5615	24.129	26.4608	24.9016	25.3237	26.7635	25.3111	NaN	25.0436	25.3963	NaN	25.5561	25.8526	26.0222	24.8906	26.8681	26.0835	S	1	2	______________MSFGRDMELEHFDERDK	Dclk1	Serine/threonine-protein kinase DCLK1	Q80VB6
24.9087	24.9616	24.7085	24.2844	25.5399	25.7868	26.2032	26.4738	25.1443	NaN	25.0977	25.4611	20.5792	24.9411	24.9895	25.0623	25.2385	25.4957	25.4748	25.0752	24.2758	25.7272	24.1653	S	0.987182	337	LSTPRSGKSPSPSPTSPGSLRKQRDLYRPLS;LSTPRSGKSPSPSPTSPGSLRKQRISQHGGS	Dclk1	Serine/threonine-protein kinase DCLK1	Q80VB6
NaN	NaN	NaN	NaN	NaN	NaN	NaN	NaN	NaN	24.6423	NaN	22.6611	22.6077	NaN	23.4105	NaN	22.4392	23.9556	NaN	21.8056	NaN	NaN	25.224	S	0.999978	307	RRGTTKSPGPSRRSKSPASTSSVNGTPGSQL	Dclk1	Serine/threonine-protein kinase DCLK1	Q80VB6
NaN	NaN	NaN	NaN	NaN	NaN	NaN	NaN	NaN	25.8578	24.8544	25.4569	24.1374	NaN	24.776	25.3678	24.6141	NaN	24.859	25.7583	25.0665	25.3171	20.1191	S	0.986936	32	KAQRYSRGSRVNGLPSPTHSAHCSFYRTRTL	Dclk1	Serine/threonine-protein kinase DCLK1	Q80VB6
NaN	22.915	23.13	23.2363	24.7473	24.2576	24.6457	24.4253	NaN	NaN	NaN	NaN	NaN	NaN	NaN	24.731	NaN	NaN	24.9126	NaN	25.1655	NaN	NaN	S	0.99418	36	YSRGSRVNGLPSPTHSAHCSFYRTRTLQTLS	Dclk1	Serine/threonine-protein kinase DCLK1	Q80VB6
NaN	NaN	NaN	NaN	NaN	NaN	NaN	NaN	NaN	NaN	21.5933	24.4391	NaN	NaN	24.7936	23.8108	22.8542	23.7363	24.4812	NaN	23.2565	22.6648	22.8409	S	1	410	KSISQQSGARIELQRSPPPNADPNMKLFTIR	Fubp1	Far upstream element-binding protein 1	Q3TUE1
NaN	NaN	24.0145	23.3628	24.0067	NaN	23.9183	24.5277	25.8262	NaN	NaN	NaN	23.7263	24.4173	24.2802	24.1487	NaN	NaN	NaN	23.4642	23.7158	NaN	NaN	S	0.760778	628	WAEYYRQQAAYYAQTSPQGMPQHPPAPQGQ_	Fubp1		Q3TUE1
22.8068	22.7206	22.5436	22.3205	23.2588	23.5627	22.9439	23.6193	23.1812	22.1681	21.892	22.3695	23.2631	23.0284	23.4194	22.2016	22.9424	23.3376	22.7802	22.3244	22.441	22.8993	23.8146	S	0.987082	1238	PGKSCQPKALCPLTVSPSLPRAPVSSAQVP_	Igdcc4	Immunoglobulin superfamily DCC subclass member 4	Q9EQS9
NaN	NaN	NaN	NaN	NaN	NaN	NaN	NaN	NaN	23.6713	23.2267	24.2734	NaN	23.9457	23.0594	23.5714	23.1665	NaN	NaN	23.9931	NaN	NaN	NaN	S	0.999626	338	QSRCSSKENILRASHSAVDITKVARRHRMSP	Gphn	Gephyrin;Molybdopterin adenylyltransferase;Molybdopterin molybdenumtransferase	Q8BUV3
NaN	NaN	NaN	NaN	NaN	NaN	NaN	NaN	25.3791	NaN	NaN	23.0363	22.6734	NaN	NaN	23.9724	24.0314	24.0485	NaN	NaN	NaN	24.8278	24.7014	S	0.99876	169	LDVPSSATVKDTRSPSPAHLSNKVPVVQHPH	Tcf7l1	Transcription factor 7-like 1	A1A550
24.8508	24.5017	24.8364	24.7179	24.5043	24.6792	25.1493	25.2134	26.6472	26.5112	26.6726	26.7695	26.4902	26.4082	26.5822	26.5873	26.7064	26.4126	26.87	25.9779	25.5366	25.8946	26.8836	S	1	560	SSQGPSGGGRLLRQASLDGLQQLRDNMGLRK	Tbc1d25	TBC1 domain family member 25	A1A5B6
22.2202	22.3232	22.7033	22.2271	22.4027	22.2128	22.2549	22.8172	NaN	NaN	NaN	NaN	NaN	NaN	NaN	NaN	NaN	NaN	NaN	NaN	NaN	NaN	NaN	S	0.999993	250	EKAIMTYVSSFYHAFSGAQKAETAANRICKV	Actn1;Actn4	Alpha-actinin-4;Alpha-actinin-1	Q7TPR4
29.9915	29.9982	30.0398	29.4389	29.9915	30.1683	30.5807	30.5838	32.5555	32.0596	32.1675	32.2808	32.1804	32.2299	32.0654	32.1786	31.8796	32.0594	31.9824	31.6659	31.2987	29.0178	32.2432	S	0.999999	140	GMIWTIILRFAIQDISVEETSAKEGLLLWCQ	Actn1;Actn4;Actn2;Actn3	Alpha-actinin-4;Alpha-actinin-1;Alpha-actinin-2;Alpha-actinin-3	Q7TPR4
25.1762	25.2125	25.4494	24.953	25.3275	25.5739	26.0592	25.5001	26.3099	26.8706	27.5685	26.4125	27.5044	27.9659	26.7081	23.2472	24.8862	27.3445	28.1942	26.4404	25.9583	27.8878	26.4417	S	1	348	QLEINFNTLQTKLRLSNRPAFMPSEGRMVSD	Actn1;Actn4	Alpha-actinin-4;Alpha-actinin-1	Q7TPR4
23.052	23.055	22.8868	22.8283	23.2147	22.9058	23.1178	23.4387	27.3869	26.5691	25.7932	27.2108	26.6007	26.57	27.2985	26.2321	26.5721	26.4325	26.4902	26.2492	26.4811	26.4367	26.78	S	1	356	LQTKLRLSNRPAFMPSEGRMVSDINNAWGCL;LQTKLRLSNRPAFMPSEGRMVSDINNGWQHL	Actn1;Actn4	Alpha-actinin-4;Alpha-actinin-1	Q7TPR4
NaN	22.5135	NaN	NaN	22.4235	NaN	NaN	22.8595	24.1409	24.2332	NaN	22.4804	NaN	NaN	23.9436	NaN	22.0442	NaN	NaN	NaN	NaN	22.5603	NaN	S	1	362	LSNRPAFMPSEGRMVSDINNAWGCLEQAEKG	Actn1	Alpha-actinin-1	Q7TPR4
24.2895	24.4697	24.5974	24.644	24.6491	25.1655	25.3303	25.4782	NaN	23.041	24.9198	25.4393	23.6736	NaN	NaN	NaN	NaN	NaN	26.2035	NaN	23.4344	24.0794	NaN	S	1	677	GTLEDQLSHLRQYEKSIVNYKPKIDQLECDH	Actn1	Alpha-actinin-1	Q7TPR4
23.1071	23.1736	23.6807	23.988	23.9106	24.2164	23.9873	24.8954	27.6156	25.8679	25.9803	25.1821	25.1458	24.1504	24.4134	24.7144	NaN	25.4823	26.0839	25.8166	26.8804	25.3334	25.9224	S	1	91	RLAKPERGKMRVHKISNVNKALDFIASKGVK	Actn1	Alpha-actinin-1	Q7TPR4
23.1869	21.9379	23.677	22.2539	NaN	22.0971	23.353	23.3026	NaN	NaN	NaN	NaN	NaN	NaN	NaN	NaN	NaN	NaN	NaN	NaN	NaN	NaN	NaN	S	0.999441	529	SSGGSSGTSNSGRARSDPTHQHRHSGGHFAA	Dyrk1a	Dual specificity tyrosine-phosphorylation-regulated kinase 1A	Q61214
NaN	NaN	NaN	NaN	NaN	NaN	NaN	NaN	NaN	NaN	NaN	23.6555	22.6305	NaN	22.312	NaN	20.8824	NaN	22.9876	NaN	NaN	NaN	23.7842	S	0.982739	687	ELVIRGTRLVLPMDDSEPALNSLDDTRHSPA	Slc9a6	Sodium/hydrogen exchanger	A1L3P4
NaN	NaN	25.8799	NaN	NaN	NaN	26.1071	26.3204	28.8065	28.1324	22.599	28.6705	27.363	28.6443	28.1768	28.4663	27.8729	27.6216	28.4236	27.3718	27.9207	27.2993	27.2666	S	0.995617	700	DDSEPALNSLDDTRHSPA_____________	Slc9a6	Sodium/hydrogen exchanger	A1L3P4
NaN	NaN	NaN	NaN	NaN	NaN	NaN	NaN	23.7356	23.4989	23.7319	22.6782	23.4015	23.4261	23.8802	23.3011	22.5309	NaN	23.2757	21.7492	21.5598	23.0702	23.5067	S	1	123	MSARRSEPDRGRLTPSPDIIVLSDNEASSPR	Gatad2b	Transcriptional repressor p66-beta	Q8VHR5
NaN	NaN	NaN	NaN	NaN	NaN	22.8346	22.2607	24.4348	24.3742	23.9968	NaN	23.3774	23.8899	24.35	23.0592	24.2628	22.4961	NaN	22.4408	23.6906	24.3384	23.9002	S	0.998506	130	PDRGRLTPSPDIIVLSDNEASSPRSSSRMEE	Gatad2b	Transcriptional repressor p66-beta	Q8VHR5
NaN	NaN	NaN	NaN	NaN	NaN	NaN	NaN	NaN	NaN	NaN	24.3046	23.7019	24.6816	25.0707	NaN	23.722	NaN	NaN	NaN	24.3322	NaN	23.85	S	0.825685	135	LTPSPDIIVLSDNEASSPRSSSRMEERLKAA	Gatad2b	Transcriptional repressor p66-beta	Q8VHR5
NaN	NaN	NaN	NaN	NaN	NaN	NaN	NaN	25.2096	23.8163	NaN	24.1815	24.4018	NaN	22.9474	24.5809	24.1164	23.76	NaN	23.0787	23.3863	23.4958	24.3446	S	0.908879	136	TPSPDIIVLSDNEASSPRSSSRMEERLKAAN	Gatad2b	Transcriptional repressor p66-beta	Q8VHR5
24.6768	24.1681	24.4815	24.356	24.7212	24.2128	24.8348	24.7329	NaN	25.5165	25.4684	26.0834	25.7121	25.371	25.9802	25.328	25.7344	25.4915	25.2772	24.1929	25.577	25.6005	25.7208	S	0.999788	487	QEQEIEQRLQQQAALSPTTAPAVSSVSKQET	Gatad2b	Transcriptional repressor p66-beta	Q8VHR5
24.0418	24.2655	24.2705	NaN	NaN	24.5956	23.8118	24.3982	NaN	NaN	25.2264	25.1557	22.7452	NaN	25.7066	25.1357	25.2401	26.0201	25.7483	24.5582	25.2109	25.294	24.75	S	0.789537	334	MNLASHIQPGTVNRVSSPLPSPSAMSDAANS	Gatad2b	Transcriptional repressor p66-beta	Q8VHR5
NaN	NaN	NaN	NaN	NaN	NaN	NaN	NaN	25.2858	25.18	25.2111	25.566	23.2785	24.8216	25.1814	24.8124	25.0231	24.5522	24.7952	23.7318	24.9673	25.0872	24.9244	S	0.954735	335	NLASHIQPGTVNRVSSPLPSPSAMSDAANSQ	Gatad2b	Transcriptional repressor p66-beta	Q8VHR5
NaN	NaN	NaN	NaN	NaN	NaN	NaN	NaN	NaN	22.7239	23.0462	22.914	22.8722	21.7426	23.084	23.4351	23.4949	23.5303	NaN	NaN	21.7237	23.5562	24.1084	S	0.999326	704	KIHSHGVKDSQHIRKSPVSSSLRSVDVGLPL	Akap17b	A-kinase anchor protein 17B	A2A3V1
25.042	25.0051	25.2135	25.1322	26.1171	25.4478	25.9681	26.1979	27.3509	27.4417	27.443	27.6258	27.3818	NaN	27.2605	27.2087	26.5652	25.9754	27.2766	25.7309	25.7376	27.4155	27.2942	S	0.99926	149	STSSSSTPPQPRDSASPSTSSFCLGVPVATS	Cul4b	Cullin-4B	A2A432
25.2363	24.7272	25.5494	24.931	25.332	NaN	NaN	25.9052	27.0692	26.8503	26.8775	27.2196	26.8669	26.5961	26.0627	26.597	26.5549	26.4694	NaN	26.6463	26.1207	26.7753	26.6587	S	1	846	PQPVQSVRPPYNRAVSLDSPVSVGSGPPVKN	Ncoa3	Nuclear receptor coactivator 3	A2A468
NaN	NaN	NaN	NaN	NaN	NaN	NaN	NaN	21.9728	25.9529	23.6227	25.3915	NaN	25.2221	25.7133	24.1936	NaN	24.4634	NaN	23.4736	25.1273	24.0274	25.8517	S	1	719	STASCGEGTTRQEQLSPKKKENNALLRYLLD	Ncoa3	Nuclear receptor coactivator 3	A2A468
NaN	NaN	NaN	NaN	NaN	NaN	NaN	NaN	23.7907	22.5983	23.3754	23.8517	22.2397	21.702	22.1131	22.7686	23.5955	20.1132	NaN	NaN	NaN	NaN	22.4265	S	0.999971	543	SLLSTLSSPGPKLDNSPNMNISQPSKVSGQD	Ncoa3	Nuclear receptor coactivator 3	A2A468
23.0518	23.5051	23.5341	23.3247	23.3275	23.1295	23.5927	24.1578	NaN	NaN	NaN	NaN	NaN	NaN	NaN	NaN	NaN	NaN	NaN	NaN	NaN	NaN	NaN	S	0.798679	924	GLANSRASRMEPLASSPLGRTGADYSATLPR	Ncoa3	Nuclear receptor coactivator 3	A2A468
NaN	NaN	NaN	NaN	NaN	NaN	NaN	NaN	23.8053	22.251	21.1398	NaN	NaN	20.808	21.826	21.6312	21.568	21.4869	22.7983	NaN	NaN	NaN	NaN	S	0.911381	260	CMICVARRVTAPFPSSPESFITRHDLSGKVV	Ncoa3	Nuclear receptor coactivator 3	A2A468
NaN	NaN	NaN	NaN	NaN	NaN	NaN	NaN	23.8244	NaN	NaN	24.2833	23.8361	21.4865	24.369	21.7974	21.3433	NaN	NaN	NaN	NaN	NaN	22.819	S	0.989037	214	RMLMKTHDILEDVNASPETRQRYETMQCFAL	Ncoa3	Nuclear receptor coactivator 3	A2A468
NaN	NaN	NaN	NaN	NaN	NaN	NaN	NaN	NaN	26.4318	24.1188	24.1308	23.6854	24.8039	24.5108	24.4004	24.5231	25.492	26.8258	26.2197	26.3614	26.0498	25.6203	S	0.999929	679	ASPEPEKDFVEKAKPSPHPTKDKLKGKDETD	Zmynd8		A2A485
21.9073	21.9894	23.5284	23.5793	22.9567	23.0888	22.9773	23.5882	NaN	28.3111	19.7083	27.771	26.7531	26.8972	26.8313	25.957	27.8631	26.4914	27.3825	26.3565	27.3152	26.9231	27.4114	S	1	665	PVSEKPDPTPAKDKASPEPEKDFVEKAKPSP	Zmynd8		A2A485
NaN	NaN	NaN	NaN	NaN	NaN	NaN	NaN	25.8308	NaN	NaN	24.8858	24.0323	NaN	24.8277	NaN	25.023	24.5922	25.5961	NaN	NaN	24.5162	NaN	S	1	734	SGREGRKNKKDPKVPSPKQDAIGKPPPSSTS	Zmynd8		A2A485
23.7403	23.9193	24.4627	24.0277	24.6308	24.2434	24.7158	24.6831	26.57	27.0875	26.7819	26.9072	26.8309	26.0486	26.9033	26.3888	26.3295	26.3232	26.1826	26.1811	26.1963	25.8663	26.7711	S	1	544	LSESVQQQSAPVPLISPKRQIRSRFQLNLDK	Zmynd8		A2A485
NaN	NaN	NaN	NaN	NaN	NaN	NaN	NaN	23.5466	24.3818	22.6827	25.1515	NaN	NaN	23.1175	23.0619	23.3227	NaN	NaN	23.9241	22.4668	NaN	NaN	S	1	412	DMTASPKILLSKPLLSGGAGRRISLSDMPRS	Zmynd8		A2A485
NaN	NaN	NaN	NaN	NaN	NaN	NaN	NaN	NaN	NaN	24.4749	24.832	22.6624	24.246	24.2156	23.3545	NaN	22.16	24.2829	23.1507	24.5318	22.9515	24.1589	S	0.777203	455	DVEQDPEKKAPSSHFSASEESMDFLDKSTAS	Zmynd8		A2A485
25.1126	25.2058	26.3325	25.6778	25.7413	25.3031	25.4029	26.0421	NaN	25.9065	26.0975	27.0372	25.9569	25.8893	26.5249	26.1502	26.1592	NaN	25.9203	24.8534	25.6285	26.3592	25.9695	S	0.999355	401	TDKQEKVKLNFDMTASPKILLSKPLLSGGAG	Zmynd8		A2A485
23.8439	23.5735	24.3313	NaN	24.396	23.8692	24.8353	24.6384	26.8723	27.2717	26.9168	27.2252	26.631	26.2556	26.9102	26.7711	26.7995	26.5814	26.3639	26.3113	26.2945	25.9736	26.8027	S	0.999988	754	AIGKPPPSSTSAGNQSPPETPVLTRSATQAP	Zmynd8		A2A485
22.945	22.8646	23.6336	23.59	NaN	22.926	23.2873	23.879	22.5329	25.1963	23.4669	24.8344	24.4915	NaN	23.8624	22.6	22.8673	22.2126	24.1678	22.5505	23.0847	24.0176	23.5816	S	0.999353	420	LLSKPLLSGGAGRRISLSDMPRSPTSTNSSV	Zmynd8		A2A485
26.0209	25.951	26.0436	26.7582	26.3795	26.4968	26.6366	26.9961	28.0616	26.5566	26.5675	26.8928	26.5687	26.6303	27.4496	26.8847	27.3857	27.3906	27.1375	26.8376	27.2574	27.667	27.2393	S	0.999933	649	KPTNQVEVKEEAKSNSPVSEKPDPTPAKDKA	Zmynd8		A2A485
NaN	NaN	NaN	NaN	NaN	NaN	NaN	NaN	24.303	27.0684	27.0346	26.2764	NaN	27.0591	27.1613	27.2863	26.9552	27.599	28.3596	26.5647	27.2247	27.8225	22.3827	S	1	1248	SDASSQLFHVRAREGSFEARYQQPFEDFRIS	Plcg1	1-phosphatidylinositol 4,5-bisphosphate phosphodiesterase gamma-1;Phosphoinositide phospholipase C	Q62077
23.4206	23.4994	23.8241	23.3877	23.5566	23.4142	24.3642	24.0243	25.3826	25.8263	25.5605	26.2482	25.9426	25.4698	25.1335	25.9609	25.9015	25.5131	24.9718	24.4428	25.3068	25.9495	25.8368	S	0.999999	1221	LIKIDIFPAKENGDLSPFSGISLRERASDAS	Plcg1	1-phosphatidylinositol 4,5-bisphosphate phosphodiesterase gamma-1;Phosphoinositide phospholipase C	Q62077
NaN	NaN	NaN	NaN	NaN	NaN	NaN	NaN	23.303	23.7383	22.698	NaN	NaN	NaN	23.2815	23.5462	NaN	23.6139	23.6203	23.0886	21.707	23.105	22.1215	S	0.997501	1233	GDLSPFSGISLRERASDASSQLFHVRAREGS	Plcg1	1-phosphatidylinositol 4,5-bisphosphate phosphodiesterase gamma-1;Phosphoinositide phospholipase C	Q62077
24.0041	25.0481	26.0303	25.2752	25.7324	25.6994	25.542	25.5608	NaN	NaN	NaN	NaN	NaN	NaN	NaN	NaN	NaN	NaN	NaN	NaN	NaN	NaN	NaN	S	0.999999	1263	SFEARYQQPFEDFRISQEHLADHFDSRERST	Plcg1	1-phosphatidylinositol 4,5-bisphosphate phosphodiesterase gamma-1;Phosphoinositide phospholipase C	Q62077
NaN	NaN	NaN	NaN	NaN	NaN	NaN	NaN	NaN	23.6687	21.9664	23.7131	22.2637	NaN	24.0082	22.0935	NaN	NaN	NaN	NaN	NaN	21.0227	23.6475	S	0.999939	94	KLGDSGEAFFVQELDSDEEDVPPRLCTSPIP	Lpin3	Phosphatidate phosphatase LPIN3	Q99PI4
NaN	NaN	NaN	NaN	NaN	NaN	NaN	NaN	NaN	23.1208	20.0538	23.4175	22.6819	NaN	21.4815	23.0128	22.831	NaN	NaN	NaN	20.5364	20.4568	23.6054	S	0.999987	418	GARRWSEPSNQKLLESPNPEHIAECTLDSVD	Lpin3	Phosphatidate phosphatase LPIN3	Q99PI4
23.0597	22.7513	22.5755	22.1785	23.338	22.8949	22.6507	23.3856	24.3972	NaN	24.5378	23.5982	23.2253	NaN	22.5619	23.679	22.2375	21.8311	22.2636	NaN	17.8843	23.4151	24.7128	S	0.998866	24	QEVKLKVDSFRERITSEAEDLVANFFPKKLL	Psme3	Proteasome activator complex subunit 3	P61290
21.9779	22.3386	22.9568	22.0267	21.8449	22.1186	NaN	22.5247	24.786	NaN	24.66	23.81	22.8024	24.513	23.5227	24.1997	23.2872	23.7676	24.6758	23.5428	22.8163	NaN	23.7732	S	0.849883	117	QAAARTGKKPLAHYSSLVRVLGSDMKTTEEP	Nbr1	Next to BRCA1 gene 1 protein	P97432
NaN	NaN	NaN	NaN	NaN	NaN	NaN	NaN	24.285	24.844	23.726	23.5522	24.1079	NaN	24.3239	23.2196	23.6467	NaN	NaN	NaN	22.2388	NaN	20.2152	S	0.988992	657	EDLSGTQFVCETVIRSLTLDAAPDHNPPCRQ	Nbr1	Next to BRCA1 gene 1 protein	P97432
23.2849	23.7907	23.3565	23.2458	24.3734	24.0569	24.9573	24.8002	24.6583	23.5875	22.7863	24.4236	22.8354	23.63	23.9895	23.6771	24.3409	22.6067	23.8969	21.6207	22.2012	23.7119	23.9804	S	1	484	EPPFLRGHTKQSMDMSPIKIVKNPDGSLSQA	Dhx8	ATP-dependent RNA helicase DHX8	A2A4P0
24.3971	23.5743	23.7925	24.0441	24.3817	NaN	23.7587	NaN	NaN	27.0023	26.4557	25.4354	26.0738	25.2646	25.8732	24.2571	24.514	25.3079	26.1317	25.8416	26.1663	26.4988	25.057	S	0.999854	201	TRRGAQADHFTESPLSPGSQVQVRVDWERRF	Gm27029;Aarsd1	Alanyl-tRNA editing protein Aarsd1	A2A4P3
NaN	NaN	NaN	NaN	NaN	NaN	NaN	NaN	NaN	23.6076	24.3602	23.0014	24.6838	24.4008	24.0438	24.7585	24.9392	25.076	24.4222	21.5483	23.5241	24.524	24.798	S	0.999946	522	RAEAQALLQDYVSTQSAEE____________	Gm27029;Aarsd1	Alanyl-tRNA editing protein Aarsd1	A2A4P3
23.1208	22.5708	22.4927	22.2309	21.3986	22.4003	23.1085	23.8169	25.8064	25.5422	25.4683	26.0252	25.354	25.2383	25.851	25.215	25.6863	25.5879	25.8597	23.599	25.0124	25.3618	26.1328	S	0.996391	147	STKRPPPAMDDLDDDSDS_____________	Ptges3l		A2A4P5
NaN	NaN	NaN	NaN	NaN	NaN	NaN	NaN	NaN	NaN	NaN	NaN	NaN	NaN	NaN	22.8714	21.9025	NaN	NaN	NaN	NaN	NaN	21.1436	S	0.99099	59	LIKDGLIIRKPVTVHSRARCRKNTLARRKGR	Rpl19	60S ribosomal protein L19;Ribosomal protein L19	P84099
NaN	NaN	NaN	NaN	NaN	NaN	NaN	NaN	24.788	22.933	21.5834	24.5538	22.9345	NaN	24.4971	22.0443	23.7824	22.8869	23.5039	24.3053	25.9062	26.2686	24.2169	S	1	164	KARKKLLADQAEARRSKTKEARKRREERLQA	Rpl19	60S ribosomal protein L19;Ribosomal protein L19	P84099
24.5487	23.4758	24.053	24.0696	NaN	24.0173	NaN	24.9989	25.9094	25.5921	26.447	26.5836	25.7522	25.9429	26.6593	26.2592	26.5204	26.2299	25.0094	26.1447	27.4999	27.0878	24.906	S	0.999996	189	EERLQAKKEEIIKTLSKEEETKK________	Rpl19	60S ribosomal protein L19;Ribosomal protein L19	P84099
NaN	NaN	NaN	NaN	NaN	NaN	NaN	NaN	NaN	24.9349	24.9402	25.2726	24.5676	24.7929	24.1185	NaN	NaN	NaN	NaN	NaN	23.8612	25.3985	24.1586	S	0.988224	15	_MAAPSEHVGLGGPRSPARPEPPPTRFHQVH	Neurl2		A2A5J5
NaN	NaN	NaN	NaN	NaN	NaN	NaN	NaN	NaN	NaN	22.9236	23.8547	22.9248	NaN	23.5839	24.2031	22.7438	NaN	NaN	NaN	22.6321	NaN	23.4543	S	0.778014	976	LLQCGGPPRDGSEVLSPTKTHHMGGSQGSST	Znf335	Zinc finger protein 335	A2A5K6
25.3447	25.8724	27.8563	25.852	25.4104	25.7705	25.9854	26.4879	27.5093	27.1038	28.1157	28.6108	27.6487	27.2513	28.8745	28.1119	28.3211	28.0578	27.3582	28.0269	28.668	28.2065	27.2365	S	0.99978	227	MQSKPQSPVIQATAGSPKFSRLKQSQAQSKP	Arfgef2	Brefeldin A-inhibited guanine nucleotide-exchange protein 2	A2A5R2
25.3129	24.9077	25.837	26.7235	26.0601	25.9923	26.3031	26.5462	NaN	NaN	NaN	NaN	NaN	NaN	29.0582	28.6338	29.3	29.4384	30.476	20.9282	29.6036	28.2986	NaN	S	1	276	GKVSLENGEAPRERGSPVSGRAEPSRGTDSG	Arfgef2	Brefeldin A-inhibited guanine nucleotide-exchange protein 2	A2A5R2
NaN	NaN	NaN	NaN	NaN	NaN	NaN	NaN	24.9909	NaN	NaN	23.478	NaN	23.4618	24.3962	22.2821	22.5466	22.4081	NaN	NaN	NaN	23.7093	23.6054	S	0.990351	1535	SSIDRNASERGQSQLSNPTDDSWKGAPYAHQ	Arfgef2	Brefeldin A-inhibited guanine nucleotide-exchange protein 2	A2A5R2
23.5209	23.9607	24.4061	22.6176	NaN	NaN	23.6449	24.1684	25.4867	24.4773	25.1605	22.2397	25.1267	25.1894	24.5341	23.7803	24.8219	21.1499	25.724	22.7825	21.4235	NaN	NaN	S	0.992526	1518	EEVSDRHLDVDLDRQSLSSIDRNASERGQSQ	Arfgef2	Brefeldin A-inhibited guanine nucleotide-exchange protein 2	A2A5R2
NaN	NaN	NaN	NaN	NaN	NaN	NaN	NaN	NaN	25.3244	24.1357	24.9128	23.4262	24.451	NaN	24.3939	NaN	NaN	NaN	NaN	23.0886	NaN	NaN	S	0.947681	356	NSQTNGIADDRQSLSSADNLEPDVQGHQVAA	Arfgef2	Brefeldin A-inhibited guanine nucleotide-exchange protein 2	A2A5R2
24.0217	NaN	NaN	NaN	NaN	NaN	NaN	NaN	NaN	NaN	NaN	NaN	NaN	NaN	24.7738	NaN	NaN	NaN	NaN	23.5653	23.8597	NaN	NaN	S	0.873753	621	QEMGDGKGLDMARRCSVTSVESTVSSGTQTA	Arfgef2	Brefeldin A-inhibited guanine nucleotide-exchange protein 2	A2A5R2
26.3808	26.0758	26.105	26.6248	26.3329	24.9759	24.8442	26.4968	29.2101	28.9063	29.1865	29.5427	29.0759	28.7742	29.37	28.945	28.9434	28.6538	29.1778	28.8793	28.7408	27.5782	28.9333	S	1	262	TALAELRDNHSQADHSPLTTAAPFSRVYGVS	Sh3bp1	SH3 domain-binding protein 1	A2A5V4
28.9694	29.1495	29.443	29.2675	29.5978	29.7197	30.0056	30.0204	30.756	30.0108	29.7073	29.8652	29.5128	29.4148	29.8062	29.7292	30.133	29.5083	29.7942	29.7059	29.9284	28.9171	29.5965	S	0.992043	535	MAVRERTEADLPKPTSPKVSRNPTETAASAE	Sh3bp1	SH3 domain-binding protein 1	A2A5V4
25.6074	25.5884	26.005	25.7445	26.4141	25.6875	25.9136	26.3534	27.8411	27.7972	28.2159	28.3998	27.7255	27.6395	28.1766	27.66	27.0964	27.0275	27.5159	27.1575	26.9787	26.2591	27.0897	S	0.999948	632	VPPQPARRQSRRLPASPVISNMPAQVDQGVA	Sh3bp1	SH3 domain-binding protein 1	A2A5V4
22.8522	NaN	NaN	22.16	NaN	22.1308	23.512	NaN	NaN	NaN	NaN	NaN	NaN	NaN	NaN	NaN	NaN	NaN	NaN	NaN	NaN	NaN	NaN	S	0.806478	589	TRSSPPAPSLPPGSVSPGTPQALPRRLVGTS	Sh3bp1	SH3 domain-binding protein 1	A2A5V4
23.2704	23.7027	NaN	NaN	NaN	24.0103	23.9987	24.4563	26.9616	26.6572	26.5572	26.7282	26.4095	26.0935	26.5067	26.0606	26.1115	25.9573	26.2323	26.0702	26.05	26.317	25.3716	S	0.989358	1013	TSGSKTGREAEVAPTSPPVVPLKSRHLAATV	Kansl1	KAT8 regulatory NSL complex subunit 1	Q80TG1
NaN	NaN	NaN	NaN	NaN	NaN	NaN	NaN	25.2156	25.3037	24.9191	24.6978	NaN	24.5782	NaN	24.6493	24.1981	24.1598	NaN	24.1418	NaN	NaN	NaN	S	0.973122	249	VNSMDQPALQGSSRLSPSTDSSSNLTNVKLE	Kansl1	KAT8 regulatory NSL complex subunit 1	Q80TG1
NaN	NaN	NaN	NaN	NaN	NaN	NaN	NaN	NaN	NaN	NaN	NaN	NaN	NaN	NaN	NaN	NaN	NaN	23.1558	NaN	NaN	NaN	NaN	S	0.968114	925	SLSEFSHGQSPRSPISPELHSAPLTPVARDS	Kansl1	KAT8 regulatory NSL complex subunit 1	Q80TG1
NaN	NaN	NaN	NaN	NaN	NaN	NaN	NaN	26.4567	26.2453	26.2014	26.6084	26.3276	26.0985	25.7537	26.2803	26.5263	25.0232	25.9716	25.6233	24.7196	24.1891	26.4088	S	1	1187	KPDPKDQVLDDVSIQSPGPNCQRQNSVESDL	Bptf		E9Q6A7
NaN	NaN	NaN	NaN	NaN	NaN	NaN	NaN	NaN	25.2768	24.842	25.3473	24.5946	24.1277	25.2904	NaN	24.4018	NaN	NaN	23.0611	23.7334	24.0178	25.0045	S	1	1018	KEPEKKDQDVKELLDSDNDKSFKEEPMEIDD	Bptf		E9Q6A7
NaN	NaN	NaN	NaN	NaN	NaN	NaN	NaN	24.9445	NaN	NaN	24.7948	23.9659	24.422	NaN	NaN	23.3858	22.7659	NaN	NaN	NaN	23.5136	NaN	S	0.993725	1651	TVTTTTTTVTKLSTPSPDTGVDTISVKEQSK	Bptf		E9Q6A7
NaN	NaN	NaN	NaN	NaN	NaN	NaN	NaN	NaN	NaN	NaN	24.7237	NaN	NaN	23.2456	24.4268	23.6318	23.7765	22.1969	23.9419	25.298	25.463	NaN	S	0.999965	867	IWRESLGHTRLHRMTSIEREEKEKVKKKEKK	Bptf		E9Q6A7
NaN	NaN	NaN	NaN	NaN	NaN	NaN	NaN	23.6512	27.1325	26.1555	26.3165	24.5708	NaN	26.1892	25.7503	25.336	25.5463	NaN	24.4326	24.6261	23.3634	26.5539	S	0.999999	2347	LVATQCQPQSSVQGQSPVRVQSPPLTRIRPS	Bptf		E9Q6A7
25.3245	25.6405	25.0986	24.9916	NaN	25.6394	25.5683	25.7583	27.387	27.0246	25.8149	27.1376	26.5056	26.2196	27.1432	26.8833	27.1592	26.7868	26.9719	25.6287	25.9605	25.9392	27.0267	S	0.999999	2353	QPQSSVQGQSPVRVQSPPLTRIRPSTPSQVT	Bptf		E9Q6A7
23.609	24.6552	27.2434	26.9235	26.3656	26.7448	27.7374	26.4464	27.9458	28.1165	27.805	27.4223	26.2539	27.7743	27.2264	26.6852	25.7223	25.784	26.9313	25.4993	27.4654	27.8803	26.0143	S	1	228	SSTPGRRKPRVHRPRSPILEEKDIPPLEFPK	Bptf		E9Q6A7
24.5138	24.1051	24.2525	24.6867	24.3907	24.3697	25.0065	24.8103	27.6301	21.8707	25.6858	27.337	27.0477	26.8067	27.5107	27.1628	27.3508	26.9268	27.119	26.6199	25.8874	26.0888	27.2062	S	0.999997	1197	DVSIQSPGPNCQRQNSVESDLDARISEPAGK	Bptf		E9Q6A7
NaN	NaN	NaN	NaN	NaN	NaN	NaN	NaN	NaN	23.8261	NaN	22.8982	NaN	NaN	23.8058	22.241	21.9544	NaN	NaN	NaN	NaN	NaN	24.022	S	1	585	DSLRIKRGEDIDCDQSPEDPEKDKHEGENNS	Bptf		E9Q6A7
25.1958	25.2304	24.9677	25.0983	25.2509	25.3837	25.7866	25.8345	27.2539	29.0174	25.6603	26.7557	26.5165	26.6532	27.1843	26.4035	26.1441	26.727	27.3157	26.9842	25.3125	25.9581	27.0288	S	1	1559	EDMETESPEVKRVIPSPVRTGEGSNLSKGFM	Bptf		E9Q6A7
22.6516	NaN	24.2608	23.8766	24.2625	23.811	24.6338	24.1358	21.7494	24.017	22.7654	24.082	22.67	NaN	24.5705	23.6109	23.7848	23.7422	24.722	23.3913	23.6417	23.3289	20.7076	S	0.999286	1273	VVSSSKSTLPASVPKSPRDRDARAFSKAVDF	Bptf		E9Q6A7
24.228	24.8751	24.5273	24.5258	24.8273	24.2012	25.0836	24.9914	23.8714	24.5663	24.3004	23.7827	24.8296	24.7194	24.8959	23.279	23.9468	24.2156	NaN	22.486	23.1304	23.6401	24.4798	S	0.993983	1462	PPSSPAHRDSAYISSSPLGSHQVFDFRSNSS	Tanc2	Protein TANC2	A2A690
22.8204	21.9304	NaN	NaN	23.6404	23.6587	24.1598	24.1602	NaN	NaN	NaN	NaN	NaN	NaN	NaN	NaN	NaN	NaN	NaN	NaN	NaN	NaN	NaN	S	0.945775	400	ALSCHGTRMRQIASDSPHASPKHVDANRELP	Tanc2	Protein TANC2	A2A690
25.5995	25.5106	24.6302	25.1116	25.5483	25.3746	26.0355	25.7794	NaN	NaN	NaN	NaN	NaN	NaN	NaN	NaN	NaN	NaN	NaN	NaN	NaN	NaN	NaN	S	0.995963	1583	YQQETNVSQLPGRPKSPLSKMAQRPYQMPQL	Tanc2	Protein TANC2	A2A690
NaN	NaN	NaN	NaN	NaN	NaN	NaN	NaN	23.0519	NaN	22.4745	21.4194	22.6857	22.1306	21.487	22.709	21.2838	22.4064	NaN	NaN	NaN	NaN	22.8406	S	0.967987	410	GSLHSAFSSSRDLASSRDDFFRAKPRSASRP	Fam171a2	Protein FAM171A2	A2A699
23.5652	23.3562	23.163	NaN	24.251	NaN	24.4246	NaN	NaN	26.9474	26.8987	26.7598	26.4823	26.862	26.3762	25.2161	NaN	26.0281	26.7154	25.1209	24.8977	25.7277	25.6494	S	0.999978	475	RRGPAGAAAFLHEPPSPPPSFDHYLGHKGAA	Fam171a2	Protein FAM171A2	A2A699
NaN	NaN	NaN	NaN	NaN	NaN	NaN	NaN	26.7123	28.1614	26.7507	26.1298	27.3681	26.8003	26.979	27.2934	26.1892	25.9975	27.291	26.8906	25.1422	24.3386	25.5389	S	0.949078	785	RGDSSRSSASELRRDSLTSPEDELGAEVGDE	Fam171a2	Protein FAM171A2	A2A699
23.788	23.3081	24.146	NaN	24.6361	25.2801	25.619	24.6122	23.4432	25.2721	24.5261	25.1227	22.5826	24.2394	23.9139	24.6331	NaN	NaN	NaN	25.5667	24.6361	24.7894	NaN	S	0.999426	423	ASSRDDFFRAKPRSASRPAAEPPGARTVEGA	Fam171a2	Protein FAM171A2	A2A699
23.0191	23.3389	23.167	23.3076	23.637	23.6437	23.9618	24.0355	25.6362	25.6781	24.7973	25.8709	24.39	25.4598	25.6853	25.4467	24.6428	25.5888	NaN	24.3682	24.5332	23.9575	24.4562	S	1	445	PGARTVEGAGLKSARSVEGPGGLEPSLDEYR	Fam171a2	Protein FAM171A2	A2A699
21.8099	23.5207	NaN	NaN	24.5008	24.1418	24.3337	24.9715	NaN	NaN	NaN	NaN	NaN	NaN	NaN	24.095	22.4603	NaN	NaN	NaN	NaN	NaN	NaN	S	0.977589	511	DFLLSQSVDQLARPPSLSQPGQLIFCGSIDH	Fam171a2	Protein FAM171A2	A2A699
NaN	NaN	NaN	23.6556	NaN	NaN	24.3337	24.9715	NaN	NaN	NaN	NaN	NaN	NaN	NaN	NaN	NaN	NaN	NaN	NaN	NaN	NaN	NaN	S	0.813	513	LLSQSVDQLARPPSLSQPGQLIFCGSIDHLK	Fam171a2	Protein FAM171A2	A2A699
24.8537	24.9286	24.9114	24.4382	25.1466	25.3647	25.8871	26.2195	NaN	24.6459	25.1261	NaN	24.6605	24.9455	24.9171	24.3719	23.2527	NaN	24.9212	24.2994	NaN	25.0558	25.2321	S	0.997354	1039	SGRRDFIRSKIYRSQSPHYFQSGRGEGPGKK	Gpatch8	G patch domain-containing protein 8	A2A6A1
22.9617	22.9428	22.9087	23.6417	23.4909	24.5068	24.2273	24.7744	NaN	NaN	NaN	NaN	NaN	NaN	NaN	NaN	NaN	NaN	NaN	NaN	NaN	NaN	NaN	S	0.994066	1179	KCEESGLERGEEQEHSEPEEGSPRSSDAPFG	Gpatch8	G patch domain-containing protein 8	A2A6A1
NaN	22.4729	23.9183	23.6347	24.0551	24.3029	24.4396	24.3645	NaN	24.1713	23.5204	23.1156	23.7583	23.2529	NaN	23.9645	24.0116	23.6939	NaN	23.3631	24.1648	24.2718	23.5671	S	0.940307	648	ACSSLNKQEPGGSHMSETEDTGRSHPSKKEP	Gpatch8	G patch domain-containing protein 8	A2A6A1
NaN	NaN	NaN	NaN	NaN	NaN	NaN	NaN	NaN	25.6346	24.9668	24.6456	24.1825	NaN	24.7228	24.883	23.8996	25.2012	NaN	23.9537	24.4196	NaN	24.8221	S	1	753	PPRRRRRAQDDSQRRSLPAEEGNSGKKDDGG	Gpatch8	G patch domain-containing protein 8	A2A6A1
24.4694	NaN	NaN	NaN	24.702	25.425	NaN	NaN	NaN	NaN	25.0657	NaN	NaN	NaN	25.0727	NaN	NaN	NaN	26.3094	NaN	26.1787	25.7936	NaN	S	0.772643	733	AAADSERGPKSEPPGSGSPAPPRRRRRAQDD	Gpatch8	G patch domain-containing protein 8	A2A6A1
NaN	24.4193	24.4908	25.4171	NaN	NaN	25.633	25.7743	NaN	26.6388	25.0859	26.5878	26.398	24.5446	25.7959	25.3133	25.4708	NaN	NaN	25.7779	23.0949	25.6603	26.2252	S	0.979831	735	ADSERGPKSEPPGSGSPAPPRRRRRAQDDSQ	Gpatch8	G patch domain-containing protein 8	A2A6A1
22.341	22.172	22.5536	NaN	NaN	23.0109	23.3803	23.5475	NaN	NaN	21.5657	24.5695	24.7009	24.6357	24.8423	24.3256	24.9937	24.2735	24.1629	NaN	NaN	NaN	25.7332	S	1	451	KSSSPKPQGCSKTAASPGAERTVSEASELQK	Gpatch8	G patch domain-containing protein 8	A2A6A1
NaN	NaN	NaN	NaN	NaN	NaN	NaN	NaN	NaN	24.5783	23.577	25.1506	24.5225	23.6972	24.889	24.3982	24.5949	24.3751	23.9677	25.4339	24.7587	25.8801	24.8453	S	1	82	AMSERLRPRKRRRNGSDDDNHPPPQTKRSSR	Fam104a		A2A6P4
NaN	NaN	NaN	NaN	NaN	NaN	NaN	NaN	25.5709	NaN	22.6311	24.582	23.3667	23.5347	24.5543	NaN	23.6105	NaN	24.3493	NaN	24.0656	22.6687	NaN	S	1	62	TAPTVRCRRGAAPRRSPSPAAMSERLRPRKR	Fam104a		A2A6P4
NaN	NaN	NaN	NaN	NaN	NaN	NaN	NaN	NaN	NaN	NaN	NaN	NaN	NaN	NaN	NaN	NaN	NaN	NaN	NaN	NaN	22.8314	NaN	S	0.999978	64	PTVRCRRGAAPRRSPSPAAMSERLRPRKRRR	Fam104a		A2A6P4
27.1249	26.9317	26.7261	27.0257	26.7788	27.1315	26.4439	26.2685	28.2701	28.2674	27.9909	27.6563	27.9849	28.3321	29.1141	28.0644	28.1456	28.0396	NaN	27.9916	28.2843	28.0053	28.6107	S	1	64	DTSFLTSKAREADDESLDEQASASKLSLLSR	Cdc42ep4	Cdc42 effector protein 4	Q9JM96
NaN	NaN	NaN	NaN	NaN	NaN	NaN	NaN	NaN	NaN	NaN	NaN	NaN	NaN	NaN	NaN	NaN	NaN	27.5706	NaN	NaN	22.2235	22.5201	S	0.965657	70	SKAREADDESLDEQASASKLSLLSRKFRGSK	Cdc42ep4	Cdc42 effector protein 4	Q9JM96
NaN	NaN	NaN	NaN	24.8546	NaN	NaN	NaN	24.0633	24.9881	20.6529	23.2244	21.4778	22.6666	24.4762	24.0412	23.8655	21.8402	21.4734	19.1312	20.3462	23.4468	22.8186	S	1	103	QSVTRGDREQRDMLGSLRDSALFVKNAMSLP	Cdc42ep4	Cdc42 effector protein 4	Q9JM96
23.8327	24.0676	24.2786	24.8675	NaN	24.8693	24.8887	25.2749	26.2238	22.5566	24.3983	24.9037	23.9066	23.9971	23.7913	24.4947	23.8655	22.946	22.8734	19.0836	21.8366	22.3972	23.7804	S	0.999851	107	RGDREQRDMLGSLRDSALFVKNAMSLPQLNE	Cdc42ep4	Cdc42 effector protein 4	Q9JM96
25.1972	24.8639	25.106	25.5779	25.4471	24.898	25.3847	25.8121	26.2811	25.438	25.4906	25.8496	25.4421	25.473	26.0635	25.6241	25.2913	24.4308	25.4375	23.8112	25.284	25.5687	25.7869	S	1	116	LGSLRDSALFVKNAMSLPQLNEKEAAEKDSS	Cdc42ep4	Cdc42 effector protein 4	Q9JM96
NaN	NaN	NaN	NaN	NaN	NaN	NaN	NaN	26.4395	25.2817	24.5373	25.4333	25.4623	25.158	25.6241	25.4623	25.8372	25.9508	25.7891	25.0652	25.6356	25.194	26.1183	S	0.988068	140	AAEKDSSKLPKSLSSSPVKKADARDGGPKSP	Cdc42ep4	Cdc42 effector protein 4	Q9JM96
NaN	NaN	NaN	NaN	NaN	NaN	NaN	NaN	25.2771	24.9194	24.4722	24.88	24.6908	NaN	25.2429	24.6114	23.6437	24.003	23.7665	23.5265	23.7586	23.5516	23.9313	S	0.982516	365	TQSSGPQTSTTPQVLSPTITSPPNALPRRSS	Cdc27	Cell division cycle protein 27 homolog	A2A6Q5
NaN	NaN	NaN	NaN	NaN	NaN	NaN	NaN	25.6061	NaN	24.3894	24.6433	24.4222	25.2237	24.6736	24.5756	25.5618	25.2196	25.318	NaN	23.9121	24.3535	24.495	S	1	407	ISRDSSWRDLLGGEESPGEGKAGEKSLSQHV	Cdr2l	Cerebellar degeneration-related protein 2-like	A2A6T1
26.8465	22.4422	26.8598	26.9318	27.5336	27.0924	26.9238	NaN	29.0095	29.2171	29.2835	29.3999	28.2992	28.648	29.1845	28.7739	27.7741	27.5851	28.5355	28.0993	28.6894	28.6517	28.5063	S	0.986537	179	LCTSSRCEDAFRLHSSSLELGPRPLEQENER	Cdr2l	Cerebellar degeneration-related protein 2-like	A2A6T1
24.1377	NaN	23.7774	23.5097	24.4897	NaN	24.3607	NaN	NaN	NaN	NaN	NaN	NaN	26.3818	NaN	NaN	NaN	NaN	26.2642	24.2796	24.6373	NaN	25.1298	S	0.779469	180	CTSSRCEDAFRLHSSSLELGPRPLEQENERL	Cdr2l	Cerebellar degeneration-related protein 2-like	A2A6T1
22.1017	22.6981	23.08	21.8285	NaN	22.6718	22.2309	23.0935	NaN	NaN	NaN	NaN	NaN	NaN	NaN	NaN	NaN	NaN	NaN	NaN	NaN	NaN	NaN	S	0.907294	318	SSPAASPSHAVRKSCSDTALNAIVAKDPASR	Cdr2l	Cerebellar degeneration-related protein 2-like	A2A6T1
25.7196	25.5326	25.4994	25.2785	25.2706	25.5323	25.7765	26.0289	26.8046	27.2034	27.21	26.9333	27.0214	26.2984	28.314	27.5423	27.7861	27.5875	27.1873	26.6627	27.1835	26.8298	27.7652	S	1	222	FAKDDTIGRVGRLHGSVPNLSRYLESRDTSG	Osbpl7	Oxysterol-binding protein	F8VQM4
24.1072	23.5306	24.6726	23.8055	24.046	23.5215	22.8989	23.2309	27.5721	27.9117	28.0116	28.2701	27.917	27.1991	28.0258	28.0016	27.8859	27.8252	27.2722	26.2846	25.7857	26.2319	28.3623	S	1	121	TDGSLEVERRAAHQESDNENEIQIQNQLKKD	Zmym4	Zinc finger MYM-type protein 4	A2A791
NaN	NaN	NaN	NaN	NaN	NaN	NaN	NaN	NaN	NaN	NaN	NaN	23.9592	21.4957	23.0113	23.9131	NaN	NaN	NaN	NaN	21.965	NaN	22.1896	S	0.946341	792	SPAWSLSGRDERETGSPPCFDEYKISKEWAA	Prdm2		A2A7B5
NaN	NaN	23.6882	23.829	23.5544	23.5683	24.0984	24.3608	NaN	23.7761	25.2928	24.8241	24.9432	25.0206	23.552	24.031	NaN	24.5456	25.6801	24.2241	23.6143	24.5603	25.2312	S	0.809205	330	LLEEPRSVPTETSEGSPGATPPPHAPRAREE	Prdm2		A2A7B5
25.1264	25.072	25.1784	25.323	25.4947	25.1935	26.1512	25.7709	25.5577	25.5099	24.6429	26.2333	25.8958	25.6152	26.2095	25.7089	26.28	26.1972	25.8779	24.8625	24.6067	24.8805	26.3363	S	0.999998	638	SPSSTNCESKKRRTASPPVLPKIKAETDSDS	Prdm2		A2A7B5
NaN	NaN	NaN	NaN	NaN	NaN	NaN	NaN	26.8943	NaN	26.246	26.7871	NaN	26.3641	25.8375	26.5836	27.1768	26.9188	25.9874	NaN	25.9344	26.5293	26.2742	S	0.992674	1156	ESSCEETESKISGISSPIGSHREEGEEKEGR	Rlf		E9Q532
23.4912	23.3773	24.1253	NaN	NaN	NaN	NaN	NaN	26.7001	27.1157	26.8223	26.9868	26.5055	25.8072	26.9353	26.2337	26.239	26.2499	26.4839	25.6957	25.4424	24.6532	25.8742	S	0.998478	521	KKLLLKSAQRGIYPKSPTGSLEQNPEQARGE	Rlf		E9Q532
NaN	NaN	NaN	NaN	NaN	NaN	NaN	NaN	24.65	24.0737	22.6416	24.8587	24.0771	23.68	24.7077	23.8134	24.4848	23.3229	NaN	22.6392	24.2162	24.4047	24.295	S	0.993415	1282	SDSHNLDHIEESKVLSETESAARFSCNQPQC	Rlf		E9Q532
22.591	22.8738	22.5922	23.455	24.0609	23.9653	24.3247	24.6216	25.5979	21.7193	20.1702	24.2549	23.5122	23.7999	24.671	24.7684	24.8253	24.4104	24.9214	20.0298	22.9606	23.6869	25.0529	S	1	28	TRRRRRTRKGRGCRLSAGNRDSGAMGDAPSP	Yars	Tyrosine--tRNA ligase	A2A7S7
NaN	NaN	NaN	NaN	NaN	NaN	NaN	NaN	22.6859	24.9142	23.0475	23.7013	21.6258	23.8341	NaN	22.0628	NaN	24.3599	NaN	23.6482	23.7208	23.1774	23.1687	S	0.99361	34	TRKGRGCRLSAGNRDSGAMGDAPSPEEKLHL	Yars	Tyrosine--tRNA ligase	A2A7S7
NaN	NaN	NaN	NaN	NaN	NaN	NaN	NaN	25.6083	NaN	NaN	NaN	25.1902	25.0413	26.2958	24.4999	25.345	24.8745	NaN	NaN	NaN	NaN	25.6499	S	0.954422	895	SPGSSAPQKPLRRALSGRASPVTAPSSGLHA	Kiaa1522	Uncharacterized protein KIAA1522	A2A7S8-2
NaN	NaN	NaN	NaN	NaN	NaN	NaN	NaN	25.7771	25.5236	24.7648	23.5909	25.0409	25.1682	25.3383	24.1509	NaN	NaN	NaN	NaN	23.4003	NaN	24.3118	S	0.996864	899	SAPQKPLRRALSGRASPVTAPSSGLHAAVRL	Kiaa1522	Uncharacterized protein KIAA1522	A2A7S8-2
NaN	NaN	NaN	NaN	NaN	NaN	NaN	NaN	26.3451	25.6521	25.2991	25.9277	25.2109	24.6933	24.6874	25.5108	25.5764	25.5589	25.1102	24.9356	24.3842	23.8641	25.4626	S	1	17	AARAPPAAPAADEPGSPGGPPRRKKSRSGLR	Kiaa1522	Uncharacterized protein KIAA1522	A2A7S8-2
NaN	NaN	NaN	NaN	NaN	NaN	NaN	NaN	NaN	NaN	22.6793	24.2552	24.0178	24.0129	NaN	NaN	24.07	23.3256	NaN	23.9773	NaN	NaN	23.4588	S	0.95801	940	PASALPTGIPEAEPRSPQSPASKASFIFSKG	Kiaa1522	Uncharacterized protein KIAA1522	A2A7S8-2
25.9654	26.0827	26.073	26.2283	25.7494	25.9253	26.1078	26.7296	27.7501	27.0351	27.0222	27.4767	27.1743	26.7735	27.604	27.0578	27.4706	27.1172	27.3894	26.6368	26.9682	27.5285	27.6523	S	1	600	GTPTLPPKGLAVAPASPGKAQPPKPDRVTSL	Kiaa1522	Uncharacterized protein KIAA1522	A2A7S8-2
NaN	NaN	NaN	NaN	NaN	NaN	NaN	NaN	26.2609	NaN	26.209	26.0929	25.6596	25.5267	26.1683	25.8477	25.3946	25.7985	26.126	24.1307	23.6756	24.0339	24.5753	S	0.996792	459	SNNVAPPPPGGSGRGSPSGGSTAETSDTASI	Kiaa1522	Uncharacterized protein KIAA1522	A2A7S8-2
NaN	NaN	NaN	NaN	NaN	NaN	NaN	NaN	24.6873	NaN	24.0405	NaN	25.0128	25.5483	26.0212	23.4908	NaN	24.9079	26.1506	NaN	23.0245	24.7928	22.5133	S	0.809281	193	EDALSVRSEMIQRRGSTFRPHDSFPKSGKSG	Kiaa1522	Uncharacterized protein KIAA1522	A2A7S8-2
NaN	NaN	NaN	NaN	NaN	NaN	NaN	NaN	23.1187	NaN	NaN	NaN	NaN	NaN	21.4687	22.5389	NaN	NaN	NaN	NaN	NaN	NaN	22.2656	S	0.99135	200	SEMIQRRGSTFRPHDSFPKSGKSGRRRRERR	Kiaa1522	Uncharacterized protein KIAA1522	A2A7S8-2
25.0669	24.7502	24.8423	24.8977	24.7521	24.806	25.1902	24.9539	27.8706	26.2849	27.1958	28.0022	27.6889	27.7318	27.5701	26.1333	27.4016	27.9384	27.2611	26.9417	27.1142	27.668	26.2944	S	1	966	IFSKGTKKLQLERPVSPEAQADLQRNLVAEL	Kiaa1522	Uncharacterized protein KIAA1522	A2A7S8-2
NaN	NaN	NaN	NaN	NaN	NaN	NaN	NaN	21.5782	22.5384	22.434	22.9346	22.9736	NaN	23.1638	22.7816	22.7885	23.0314	22.9748	22.6696	22.488	23.0683	23.2685	S	0.999999	1009	QKKPSKAPPPVARKPSVGVPPPSPSLPRTES	Kiaa1522	Uncharacterized protein KIAA1522	A2A7S8-2
NaN	NaN	NaN	NaN	NaN	NaN	NaN	NaN	25.9599	25.7293	25.608	25.685	NaN	25.0917	24.4902	24.6765	25.8753	25.7529	NaN	24.3375	24.1923	25.5544	25.4256	S	0.963137	1016	PPPVARKPSVGVPPPSPSLPRTESLTAPSTN	Kiaa1522	Uncharacterized protein KIAA1522	A2A7S8-2
24.0595	24.4239	24.1967	24.5542	24.1758	24.4809	NaN	NaN	NaN	25.1305	21.8921	24.5613	NaN	NaN	24.5954	24.7141	NaN	NaN	NaN	25.0112	NaN	23.8921	NaN	S	0.857063	216	FPKSGKSGRRRRERRSTVLGLPQHVQKELGL	Kiaa1522	Uncharacterized protein KIAA1522	A2A7S8-2
22.4693	22.381	22.968	24.527	23.9278	24.1132	24.7732	NaN	NaN	NaN	NaN	NaN	NaN	NaN	NaN	NaN	NaN	NaN	NaN	NaN	NaN	NaN	NaN	S	0.996536	502	LRKMKRPPPPPRRTYSLHQRGSAVPDGPLGL	Kiaa1522	Uncharacterized protein KIAA1522	A2A7S8-2
22.9687	22.5555	22.8693	23.1924	22.562	22.4561	22.5093	22.9432	NaN	24.7769	23.538	23.343	NaN	24.0223	23.4082	22.5564	22.6902	23.0968	NaN	23.4687	NaN	NaN	22.3516	S	0.996121	667	DRFVIPPHPKVPAPFSPPPSKSKSSNQAAPV	Kiaa1522	Uncharacterized protein KIAA1522	A2A7S8-2
NaN	NaN	NaN	NaN	NaN	NaN	NaN	NaN	NaN	23.766	24.118	23.6189	NaN	NaN	23.2667	22.6914	NaN	23.6136	NaN	NaN	NaN	NaN	22.6691	S	0.997827	270	VDGRPGLALGTGVRVSLQALEAETEAGTDAE	Kiaa1522	Uncharacterized protein KIAA1522	A2A7S8-2
23.8841	NaN	24.1173	NaN	NaN	NaN	24.4232	24.802	26.7928	26.8209	26.4227	25.4678	26.3993	26.8301	26.0904	26.3743	26.9518	26.8641	27.0683	26.1318	25.2007	26.2854	26.7672	S	1	600	RSGRKKQPTSPDGRASPINEDIRSSGRNSPS	Rere	Arginine-glutamic acid dipeptide repeats protein	Q80TZ9
26.1664	25.8014	25.9621	25.8169	25.835	26.4265	26.7621	26.7975	28.539	27.2589	27.2749	28.2066	26.7079	27.088	27.2748	27.5973	27.8954	27.598	27.7896	27.2148	28.2526	28.0695	26.7487	S	1	642	ETVKKSAKKVKEEAASPLKSTKRQREKVASD	Rere	Arginine-glutamic acid dipeptide repeats protein	Q80TZ9
NaN	NaN	NaN	NaN	NaN	NaN	NaN	NaN	NaN	NaN	NaN	NaN	NaN	NaN	NaN	NaN	NaN	NaN	NaN	NaN	25.6238	NaN	NaN	S	0.984996	594	GSMSTLRSGRKKQPTSPDGRASPINEDIRSS	Rere	Arginine-glutamic acid dipeptide repeats protein	Q80TZ9
22.9943	22.2815	22.7871	23.1703	NaN	23.5406	23.8813	24.3499	24.5861	NaN	NaN	NaN	24.045	24.1032	24.7448	23.3126	22.6006	24.2053	24.761	NaN	23.6068	NaN	24.639	S	0.98787	1258	PALRTLSEYARPHVMSPTNRNHPFYMPLNPT	Rere	Arginine-glutamic acid dipeptide repeats protein	Q80TZ9
26.1522	26.2788	26.3771	27.2121	26.5651	27.4949	27.8238	27.6505	28.5405	28.7267	28.6327	28.9451	28.8236	28.0095	28.9764	28.7539	28.89	28.5718	28.4229	28.1731	28.7019	28.6365	28.6383	S	0.999995	656	ASPLKSTKRQREKVASDTEDTDRITSKKTKT	Rere	Arginine-glutamic acid dipeptide repeats protein	Q80TZ9
NaN	NaN	NaN	NaN	NaN	NaN	NaN	NaN	NaN	NaN	NaN	22.9407	22.8866	NaN	NaN	NaN	23.7161	22.9399	NaN	20.6062	21.2824	20.9611	20.4222	S	0.999999	562	QTDLPLPEWKSEEPESPPAKRRRVDFSQTYN	Zmym6		A2A7U2
22.2761	22.0793	NaN	22.4261	NaN	22.1202	22.1874	22.2506	22.3127	22.9535	23.4686	19.4466	22.6021	22.9405	22.8455	22.6547	23.83	NaN	22.9817	21.1735	21.6534	NaN	24.327	S	0.999962	307	SIMDPPHQYRIHRRKSFDASDTLALPRHCLL	Miip	Migration and invasion-inhibitory protein	A2A7Y5
NaN	NaN	NaN	NaN	NaN	NaN	NaN	NaN	24.6161	24.1744	24.1157	24.366	23.4083	23.1849	24.5864	23.9566	23.6676	21.9544	NaN	22.4216	22.791	21.8836	22.4395	S	0.998363	190	AFERLVDAICDKMSDSMDTDPSVLGASKTTR	Rab3b	Ras-related protein Rab-3B	Q9CZT8
23.8885	23.5765	NaN	NaN	24.5999	24.7551	25.2684	25.4637	25.7944	25.7815	25.6614	25.6262	25.4173	25.447	25.9463	25.5793	25.5234	25.2795	25.7942	25.2932	25.6761	25.4485	25.4935	S	0.999892	336	AEGAEEGPGPPRANLSPSSSFRAQRSTRGST	Arhgef19	Rho guanine nucleotide exchange factor 19	Q8BWA8
22.0499	21.7471	22.6592	22.9711	23.5886	23.3173	24.0443	23.7414	NaN	NaN	NaN	NaN	NaN	NaN	NaN	NaN	NaN	NaN	NaN	NaN	NaN	NaN	NaN	S	0.984288	678	EDLDKSQEEIKKHHASISELKKNFMESVPEP	Epb41;Epb4.1	Protein 4.1	P48193
26.1062	26.1282	26.7914	26.8915	27.0848	27.4647	27.684	27.5527	25.5061	25.7948	25.8022	NaN	25.0647	NaN	NaN	24.4744	24.8195	25.1276	26.323	25.1072	25.4618	26.4996	25.0401	S	0.96655	703	ESVPEPRPSEWDKRLSTHSPFRTLNINGQVP	Epb41;Epb4.1	Protein 4.1	P48193
NaN	NaN	NaN	NaN	NaN	NaN	NaN	NaN	24.5987	23.2926	23.0623	22.3998	NaN	NaN	NaN	NaN	22.6669	NaN	NaN	NaN	NaN	NaN	NaN	S	0.999943	543	PAPHFERTASKRASRSLDGAAAAESTDRSPR	Epb41;Epb4.1	Protein 4.1	P48193
NaN	NaN	NaN	NaN	NaN	NaN	NaN	NaN	NaN	NaN	NaN	NaN	24.5443	NaN	23.5785	24.7205	24.6368	24.5706	NaN	24.1279	23.3829	NaN	24.0893	S	0.789936	561	GAAAAESTDRSPRPTSAPAIAQSQVTEGPGA	Epb41;Epb4.1	Protein 4.1	P48193
NaN	NaN	23.9193	22.6682	22.6906	23.4033	23.6267	23.7268	24.601	25.132	24.9587	24.718	24.9118	24.6535	25.7235	25.5631	25.867	25.2973	25.2697	24.7549	25.6588	24.3506	25.4721	S	0.999992	94	RGLSRLLSSFLKRPKSQVSEEEGREVESEKE	Epb41;Epb4.1	Protein 4.1	P48193
22.834	24.276	24.4326	24.4775	NaN	NaN	22.9714	24.4314	NaN	NaN	NaN	NaN	NaN	NaN	NaN	NaN	NaN	NaN	NaN	NaN	NaN	NaN	NaN	S	0.99957	185	KFSFEDFEDPLAGLLSDEEEETATKLPAVER	Fbf1	Fas-binding factor 1	A2A870
21.1786	22.9008	22.6511	23.0481	22.8811	23.2679	23.3508	23.3333	25.4869	25.2531	24.3196	25.1835	25.259	24.869	25.5672	25.2103	25.0234	25.0628	25.1277	23.8819	24.483	23.9085	25.0191	S	1	206	TATKLPAVERKPAPKSPGAAAGQGPSVPLTP	Fbf1	Fas-binding factor 1	A2A870
NaN	NaN	NaN	NaN	NaN	NaN	NaN	NaN	26.0736	NaN	25.5845	25.8665	25.6553	NaN	25.8975	25.3359	24.5137	25.0222	24.9962	23.5385	20.8742	23.2559	NaN	S	0.955489	28	DKVLDEFEQNEDETVSPTLLDTKWNKILDPS	Zfyve9		A8Y5G5
21.7747	22.382	21.5559	NaN	NaN	NaN	22.4406	22.4059	23.4502	23.0313	22.4829	22.8796	22.9108	22.8123	22.8863	NaN	22.5259	NaN	NaN	21.1201	21.5568	22.9511	22.8058	S	0.999996	454	RVSPSSLPGRLSRALSLGTIPPLTRTDSGYL	Tmem201	Transmembrane protein 201	A2A8U2
25.4046	25.4	25.3258	25.1647	25.2283	25.6294	25.9005	25.9719	NaN	NaN	NaN	NaN	NaN	NaN	NaN	NaN	26.5172	NaN	25.3466	NaN	24.6335	24.1341	25.1933	S	0.998547	441	LPLTKQQLFRSPRRVSPSSLPGRLSRALSLG	Tmem201	Transmembrane protein 201	A2A8U2
26.5425	26.2513	26.5406	28.5293	28.7732	28.7165	29.1203	28.9727	29.2114	26.4564	27.7695	28.0672	27.8232	27.833	28.5498	28.0024	28.1925	28.0406	29.0323	28.2826	28.6618	28.6387	26.0201	S	1	751	RVSRTPEPKKIKKAASPSPQSVRRVSSSRSV	Srrm1	Serine/arginine repetitive matrix protein 1	A2A8V9
NaN	NaN	22.9361	NaN	NaN	NaN	NaN	NaN	22.3164	24.1343	30.3496	NaN	23.2304	23.7626	23.2269	23.8482	24.1282	24.2143	NaN	20.8563	NaN	NaN	24.6044	S	1	753	SRTPEPKKIKKAASPSPQSVRRVSSSRSVSG	Srrm1	Serine/arginine repetitive matrix protein 1	A2A8V9
NaN	NaN	NaN	NaN	NaN	NaN	NaN	NaN	NaN	23.8252	NaN	NaN	NaN	NaN	NaN	NaN	23.1806	NaN	NaN	NaN	NaN	NaN	NaN	S	0.782734	808	WSPAVPAKKAKSPTPSLSPARNSDQEGGGKK	Srrm1	Serine/arginine repetitive matrix protein 1	A2A8V9
NaN	NaN	NaN	NaN	NaN	NaN	NaN	NaN	24.3884	NaN	23.8001	24.2299	23.0457	23.5696	24.4048	23.7171	NaN	NaN	NaN	23.0405	23.889	24.3491	24.219	S	0.998909	810	PAVPAKKAKSPTPSLSPARNSDQEGGGKKKK	Srrm1	Serine/arginine repetitive matrix protein 1	A2A8V9
26.386	26.272	26.4306	26.3576	26.7033	27.1108	27.333	27.2484	27.6521	28.3841	27.9681	28.4714	27.2677	27.077	28.0209	27.1688	27.5454	27.3196	27.4627	28.015	28.1909	28.1839	27.2412	S	1	260	LKAPKPEPVPEPKEPSPEKNSKKEKEKTRPR	Srrm1	Serine/arginine repetitive matrix protein 1	A2A8V9
29.2411	29.2738	29.1421	NaN	29.2387	30.0553	30.3394	30.3633	31.5064	31.8269	30.8218	31.3194	30.6207	30.6224	31.3282	31.1615	31.4492	31.1878	31.01	30.7523	31.1236	30.2056	31.0737	S	0.999633	709	KRHSPSPRPRAPQTSSPPPVRRGASASPQGR	Srrm1	Serine/arginine repetitive matrix protein 1	A2A8V9
NaN	NaN	NaN	NaN	NaN	NaN	NaN	NaN	25.1535	24.1832	22.2966	22.76	24.7895	25.2291	22.1142	22.4411	25.5202	24.1467	25.3848	24.1727	NaN	NaN	25.14	S	0.999999	915	HLREKALRSMRKAQVSPQS____________	Srrm1	Serine/arginine repetitive matrix protein 1	A2A8V9
19.1733	22.6495	24.0331	24.0694	24.0288	23.9117	23.2707	23.7746	25.277	24.2838	23.212	24.1479	23.5201	24.3339	24.7326	23.9294	24.9577	24.3224	25.3058	21.2305	25.7182	25.2616	25.6631	S	1	640	KRRTASPPPPPKRRASPSPPPKRRVSHSPPP	Srrm1	Serine/arginine repetitive matrix protein 1	A2A8V9
NaN	NaN	NaN	NaN	NaN	NaN	NaN	NaN	NaN	21.7825	22.0853	24.3016	NaN	21.375	20.7919	20.7022	21.8084	22.5977	21.3802	23.4257	23.6792	NaN	21.2081	S	1	642	RTASPPPPPKRRASPSPPPKRRVSHSPPPKQ	Srrm1	Serine/arginine repetitive matrix protein 1	A2A8V9
NaN	NaN	NaN	NaN	NaN	NaN	NaN	NaN	NaN	23.7615	23.9622	24.1591	22.8587	NaN	NaN	NaN	NaN	NaN	23.6072	22.3176	22.8977	22.7552	23.1286	S	0.899629	870	PATAAPAAVSAATTTSAQEEPAAAPEPRKET	Srrm1	Serine/arginine repetitive matrix protein 1	A2A8V9
25.473	24.7213	25.7108	25.7723	25.506	25.3836	25.9514	26.1535	NaN	NaN	28.5054	30.5442	22.9529	NaN	29.5516	30.075	NaN	31.4681	NaN	NaN	23.023	21.6637	32.9707	S	1	689	HRKGSSPGRSTREARSPQPNKRHSPSPRPRA	Srrm1	Serine/arginine repetitive matrix protein 1	A2A8V9
29.2736	29.1032	29.2771	28.9778	29.5935	29.5755	29.9054	29.6135	31.3046	31.1061	30.9772	31.2858	30.8776	31.0221	31.3619	30.9177	31.2255	31.0785	31.4796	30.9536	30.9939	31.2254	31.1533	S	1	220	TKSRSPSPAPEKKEKSPELPEPSVRMKDSSV	Srrm1	Serine/arginine repetitive matrix protein 1	A2A8V9
27.4159	26.9445	28.0256	27.9948	28.354	28.7289	29.5251	29.7423	29.1767	29.2859	28.9325	29.0388	28.8095	28.6627	29.1598	28.5972	28.7821	28.7884	29.4321	29.7777	29.5689	29.6385	28.5647	S	1	443	TSGKVTKHKGTEKRESPSPAPKPRKVELSES	Srrm1	Serine/arginine repetitive matrix protein 1	A2A8V9
NaN	NaN	30.7863	NaN	NaN	NaN	NaN	NaN	NaN	NaN	NaN	NaN	NaN	NaN	NaN	NaN	NaN	NaN	NaN	NaN	25.5303	NaN	NaN	S	1	445	GKVTKHKGTEKRESPSPAPKPRKVELSESEE	Srrm1	Serine/arginine repetitive matrix protein 1	A2A8V9
26.9866	26.4463	26.1149	26.5749	27.0515	26.8029	27.3157	27.0864	28.8338	28.5054	28.4894	28.8567	28.5801	27.8595	28.7589	28.5988	28.5124	28.4654	28.3202	28.1506	28.2794	28.3618	28.7492	S	1	887	QEEPAAAPEPRKETESEAEDDNLDDLERHLR	Srrm1	Serine/arginine repetitive matrix protein 1	A2A8V9
NaN	25.5423	25.6653	26.2839	26.0487	26.1884	26.6122	26.1316	27.0764	27.5747	27.0599	27.2422	26.6912	26.7474	27.3277	26.7773	25.2865	26.5399	27.3834	25.8649	26.2094	24.8004	26.643	S	0.999996	726	PPVRRGASASPQGRQSPSPSTRPIRRVSRTP	Srrm1	Serine/arginine repetitive matrix protein 1	A2A8V9
NaN	NaN	NaN	NaN	NaN	NaN	NaN	NaN	NaN	NaN	NaN	NaN	NaN	NaN	NaN	22.4747	23.3569	22.3864	NaN	23.5515	24.739	24.499	NaN	S	0.99963	10	______MDAGFFRGTSAEQDNRFSNKQKKLL	Srrm1	Serine/arginine repetitive matrix protein 1	A2A8V9
23.7401	NaN	24.3749	25.633	NaN	25.9215	NaN	26.0794	25.806	25.727	24.7862	23.5946	25.0492	24.7285	25.3835	25.9112	26.5995	25.7802	25.7072	22.9884	24.5397	26.017	NaN	S	0.944327	395	RLSPSASPPRRRHRPSSPATPPPKTRHSPTP	Srrm1	Serine/arginine repetitive matrix protein 1	A2A8V9
NaN	NaN	24.3749	25.633	NaN	25.9215	NaN	26.0794	25.4471	25.727	24.6472	24.4174	NaN	24.6046	24.1054	NaN	25.1451	NaN	25.7072	NaN	24.5397	21.4349	NaN	S	0.953048	396	LSPSASPPRRRHRPSSPATPPPKTRHSPTPQ	Srrm1	Serine/arginine repetitive matrix protein 1	A2A8V9
26.1973	24.7538	25.2547	26.0386	25.1637	25.8367	25.9788	26.4151	NaN	24.5111	22.5901	22.8239	22.886	NaN	21.2107	21.6893	NaN	24.6809	NaN	23.9129	23.9209	22.9399	NaN	S	1	697	RSTREARSPQPNKRHSPSPRPRAPQTSSPPP	Srrm1	Serine/arginine repetitive matrix protein 1	A2A8V9
23.6825	23.4406	24.5776	24.0073	25.0747	24.0972	24.3704	25.3133	NaN	27.4961	25.8601	26.8822	24.9256	24.5852	26.0552	25.1173	25.0962	23.8379	27.3342	27.3677	27.5002	25.2643	26.1378	S	0.999775	407	HRPSSPATPPPKTRHSPTPQQSNRTRKSRVS	Srrm1	Serine/arginine repetitive matrix protein 1	A2A8V9
NaN	NaN	NaN	NaN	24.0026	NaN	22.765	23.2244	NaN	NaN	NaN	24.5618	NaN	NaN	23.9093	23.0836	22.4253	NaN	23.8388	NaN	NaN	22.9043	NaN	S	0.999987	782	SGSPEPAAKKPPAPPSPVQSQSPSTNWSPAV	Srrm1	Serine/arginine repetitive matrix protein 1	A2A8V9
27.381	27.1923	29.102	27.7641	27.2647	28.2977	28.4112	28.2711	29.4276	31.3967	30.8568	30.9442	30.4375	29.8356	30.9446	30.8409	30.9928	30.9823	30.0594	30.9867	30.9589	30.9087	30.5151	S	1	456	RESPSPAPKPRKVELSESEEDKGSKMAAADS	Srrm1	Serine/arginine repetitive matrix protein 1	A2A8V9
26.3662	25.6847	NaN	26.2167	26.3519	26.1575	27.2903	26.6034	NaN	NaN	NaN	NaN	26.4989	27.2236	25.4737	27.109	27.4548	27.289	27.5636	NaN	NaN	25.9012	NaN	S	1	458	SPSPAPKPRKVELSESEEDKGSKMAAADSVQ	Srrm1	Serine/arginine repetitive matrix protein 1	A2A8V9
27.0631	27.1134	28.5221	28.5382	28.1688	27.631	28.1916	28.4792	NaN	31.1624	29.5643	31.18	30.6024	30.5329	30.8364	30.4541	30.8071	30.6683	30.7725	30.8293	31.4711	31.6157	31.2221	S	0.999997	659	PPKRRVSHSPPPKQRSPTVTKRRSPSLSSKH	Srrm1	Serine/arginine repetitive matrix protein 1	A2A8V9
NaN	NaN	NaN	NaN	NaN	NaN	NaN	NaN	NaN	23.3941	23.4525	23.8153	23.091	23.2301	NaN	NaN	NaN	NaN	NaN	22.3202	22.5743	23.4939	NaN	S	1	382	PPKRTSSPPRKTRRLSPSASPPRRRHRPSSP	Srrm1	Serine/arginine repetitive matrix protein 1	A2A8V9
28.3216	28.3427	28.9535	29.2098	29.217	28.9109	28.8723	29.5197	27.715	26.6732	26.742	27.8163	25.8687	25.5777	26.5816	26.3639	25.3728	NaN	27.0523	26.9143	28.2029	28.5339	27.9132	S	0.999999	667	SPPPKQRSPTVTKRRSPSLSSKHRKGSSPGR	Srrm1	Serine/arginine repetitive matrix protein 1	A2A8V9
NaN	NaN	NaN	NaN	NaN	NaN	NaN	NaN	NaN	NaN	NaN	24.5272	NaN	NaN	24.3296	NaN	NaN	NaN	NaN	NaN	23.6231	NaN	NaN	S	0.999986	669	PPKQRSPTVTKRRSPSLSSKHRKGSSPGRST	Srrm1	Serine/arginine repetitive matrix protein 1	A2A8V9
NaN	NaN	NaN	NaN	NaN	NaN	NaN	NaN	23.3991	26.2597	24.219	NaN	22.0326	NaN	21.5589	21.9148	20.8512	22.5636	23.7904	NaN	21.4449	NaN	NaN	S	1	567	RRRRSPSPPPARRRRSPSPAPPPPPPPPPPR	Srrm1	Serine/arginine repetitive matrix protein 1	A2A8V9
NaN	NaN	NaN	NaN	NaN	NaN	NaN	NaN	NaN	NaN	NaN	22.9398	NaN	NaN	NaN	NaN	NaN	NaN	NaN	NaN	NaN	NaN	NaN	S	1	569	RRSPSPPPARRRRSPSPAPPPPPPPPPPRRR	Srrm1	Serine/arginine repetitive matrix protein 1	A2A8V9
28.1301	27.8526	27.6829	NaN	NaN	28.6649	29.2648	29.3519	29.4165	28.8769	28.6826	29.3307	28.7754	28.5203	29.2924	28.9783	29.2488	29.2826	28.8737	28.8148	29.4197	29.4744	29.3531	S	1	630	QRRYSPSPPPKRRTASPPPPPKRRASPSPPP	Srrm1	Serine/arginine repetitive matrix protein 1	A2A8V9
21.8896	NaN	23.4551	23.8676	23.7492	23.8844	23.2151	23.5824	NaN	24.0306	20.9343	24.0514	23.6188	23.511	24.0608	23.8489	24.1247	22.6203	23.9519	23.5054	24.1239	24.3796	24.2466	S	1	652	RRASPSPPPKRRVSHSPPPKQRSPTVTKRRS	Srrm1	Serine/arginine repetitive matrix protein 1	A2A8V9
NaN	NaN	NaN	NaN	NaN	NaN	NaN	NaN	NaN	NaN	19.9775	23.5966	22.4526	NaN	NaN	20.3163	23.3216	22.9001	25.0774	23.3524	NaN	NaN	23.4059	S	0.997764	187	PRRRKSRSPSPRRRSSPVRRERKRSHSRSPR	Srrm1	Serine/arginine repetitive matrix protein 1	A2A8V9
NaN	NaN	NaN	NaN	NaN	NaN	NaN	NaN	23.8396	23.0933	21.5728	22.0364	21.2857	22.8576	23.0382	22.9222	22.689	22.8868	NaN	NaN	NaN	NaN	22.6667	S	0.999995	767	PSPQSVRRVSSSRSVSGSPEPAAKKPPAPPS	Srrm1	Serine/arginine repetitive matrix protein 1	A2A8V9
NaN	NaN	NaN	NaN	NaN	NaN	NaN	NaN	27.6146	26.4922	26.0537	26.0663	24.4534	26.8611	26.248	27.4062	27.7585	27.5261	NaN	26.7634	27.4159	27.5729	26.8215	S	1	769	PQSVRRVSSSRSVSGSPEPAAKKPPAPPSPV	Srrm1	Serine/arginine repetitive matrix protein 1	A2A8V9
24.9383	25.2891	24.3572	24.7423	24.9957	25.0237	25.1967	25.6685	26.5999	25.1519	24.9412	25.4021	24.2315	25.0557	25.6219	25.0347	24.975	24.4755	25.4234	24.4367	24.4664	25.6279	24.839	S	1	545	QKETSPRMQMGKRWQSPVTKSSRRRRSPSPP	Srrm1	Serine/arginine repetitive matrix protein 1	A2A8V9
29.7508	29.9971	29.3095	29.5374	29.715	30.2256	30.809	30.7436	30.4726	30.877	30.3938	30.0953	29.9274	29.764	30.8233	30.2368	30.0776	29.9123	30.3428	29.8062	29.9706	30.4499	30.3925	S	1	611	PSPPPRRRSPSPRRYSPPIQRRYSPSPPPKR	Srrm1	Serine/arginine repetitive matrix protein 1	A2A8V9
23.846	NaN	23.6948	24.7356	24.3171	25.149	25.6285	25.8948	25.9956	25.3334	23.7597	24.9617	23.9393	24.3536	24.9615	24.5672	25.1308	23.6737	NaN	24.9354	25.7562	25.4423	25.0723	S	0.99999	619	SPSPRRYSPPIQRRYSPSPPPKRRTASPPPP	Srrm1	Serine/arginine repetitive matrix protein 1	A2A8V9
NaN	NaN	NaN	NaN	NaN	NaN	NaN	NaN	NaN	NaN	23.7934	NaN	NaN	NaN	NaN	NaN	NaN	NaN	NaN	NaN	NaN	NaN	NaN	S	0.999997	621	SPRRYSPPIQRRYSPSPPPKRRTASPPPPPK	Srrm1	Serine/arginine repetitive matrix protein 1	A2A8V9
27.8688	27.3248	27.3094	27.9845	28.2469	28.8247	29.064	28.8467	30.1884	NaN	28.8893	29.5061	29.2212	29.0604	29.5638	29.4875	29.3986	29.376	NaN	27.6093	28.9298	28.7524	29.075	S	1	424	TPQQSNRTRKSRVSVSPGRTSGKVTKHKGTE	Srrm1	Serine/arginine repetitive matrix protein 1	A2A8V9
NaN	NaN	NaN	NaN	NaN	NaN	NaN	NaN	NaN	NaN	25.6937	26.7013	25.2211	23.2262	23.7347	26.105	24.5455	25.0563	23.0776	26.5321	26.5763	27.2665	NaN	S	0.991092	216	LIDSSGSASVLTHSSSGNSLKRPDTTESLNS	Osbpl9	Oxysterol-binding protein;Oxysterol-binding protein-related protein 9	Q5FWX7
NaN	NaN	NaN	20.5259	22.2554	20.4576	NaN	21.7517	NaN	NaN	NaN	NaN	NaN	NaN	NaN	NaN	NaN	NaN	NaN	NaN	NaN	NaN	NaN	S	0.999996	112	APPNPDKQFLISPPASPPVGWKQVEDATPVI	Rcan1;Rcan3	Calcipressin-1;Calcipressin-3	Q9JHG6
NaN	NaN	NaN	NaN	NaN	NaN	NaN	NaN	24.3403	24.1087	23.309	24.439	NaN	23.876	24.3046	24.0766	23.043	23.3676	24.3153	22.8957	NaN	22.944	24.0845	S	0.753622	718	TPKVKRKGLGGVGGSSPSKSPPTLGPQQALS	Szt2	Protein SZT2	A2A9C3
NaN	NaN	NaN	NaN	NaN	NaN	NaN	NaN	NaN	NaN	NaN	25.4919	NaN	NaN	NaN	NaN	NaN	NaN	NaN	NaN	NaN	NaN	NaN	S	0.783117	3226	FRKPSRLPLEPETPGSLVGSPREASGMMLAP	Szt2	Protein SZT2	A2A9C3
22.2783	21.5995	22.4648	NaN	NaN	21.7924	22.0071	22.5062	23.9648	23.8337	23.7692	23.6291	23.8549	23.9518	24.1663	23.8695	23.4649	23.7142	23.9435	22.1649	22.0021	NaN	24.0455	S	0.999994	3230	SRLPLEPETPGSLVGSPREASGMMLAPGPAP	Szt2	Protein SZT2	A2A9C3
23.6526	23.0505	23.7885	24.4581	24.2086	24.3036	24.7353	25.0142	NaN	24.38	23.67	25.6589	24.6704	24.1939	24.6274	NaN	23.2689	NaN	25.0427	NaN	24.6146	24.1349	23.9526	S	0.997231	16	MAMQEKYPNDRSHATSPGSNVIQKGSSLGTE	Cep85	Centrosomal protein of 85 kDa	Q8BMK0
27.25	26.902	26.9721	27.2823	26.8865	27.2261	27.2323	27.1874	24.4914	23.296	28.6488	29.6171	28.6991	29.096	29.1176	29.1359	29.1652	29.2864	29.1635	28.9597	29.1743	28.9464	28.9388	S	0.995127	2119	PQLYKAVLPVTCHRDSFSRMSLRKMEL____	Dock7	Dedicator of cytokinesis protein 7	Q8R1A4
NaN	NaN	NaN	NaN	NaN	NaN	NaN	NaN	22.905	21.749	NaN	21.8398	22.04	NaN	21.4855	20.4939	NaN	NaN	NaN	NaN	NaN	21.2926	22.0994	S	1	241	QRKSNRHKELFALHPSPDEEEPIERLSVPDV	Dock7	Dedicator of cytokinesis protein 7	Q8R1A4
25.0825	25.5335	25.4468	24.8574	25.3187	25.8086	25.8372	26.0784	26.9478	27.5549	27.2122	26.4341	27.3736	27.0754	27.953	27.076	26.8439	26.5807	NaN	25.9321	27.5113	27.4432	26.0097	S	0.991505	1420	ARQEMVRRSRGQLERSPSGSAFGSQENLRWR	Dock7	Dedicator of cytokinesis protein 7	Q8R1A4
27.0343	26.7252	26.6353	27.1158	26.9301	26.9189	27.5528	26.8781	29.2848	29.2192	28.9034	29.1151	28.8005	28.7786	29.2524	29.0279	29.2299	28.7889	28.7352	28.8595	29.0594	29.0167	29.0618	S	0.999999	1422	QEMVRRSRGQLERSPSGSAFGSQENLRWRKD	Dock7	Dedicator of cytokinesis protein 7	Q8R1A4
27.6155	27.3979	NaN	NaN	NaN	NaN	NaN	NaN	28.3149	21.6091	27.9366	28.6099	28.085	27.6442	28.6564	28.3645	28.4094	27.9913	27.8373	27.5994	27.8736	28.2892	27.424	S	1	1428	SRGQLERSPSGSAFGSQENLRWRKDMTHWRQ	Dock7	Dedicator of cytokinesis protein 7	Q8R1A4
NaN	24.0177	NaN	NaN	NaN	NaN	NaN	NaN	NaN	NaN	24.8618	NaN	23.202	23.9759	23.515	23.2478	NaN	NaN	NaN	NaN	NaN	NaN	NaN	S	0.986463	862	SYIYYVFRLPNTYPNSPSPGPGGLGGSVHYA	Dock7	Dedicator of cytokinesis protein 7	Q8R1A4
26.0105	26.1375	26.0415	26.0983	26.5941	26.201	26.4215	26.375	28.9567	28.032	28.6867	28.9696	27.8614	27.9087	28.5183	26.7652	26.687	27.274	28.0061	25.8425	25.9175	NaN	27.1064	S	0.997573	864	IYYVFRLPNTYPNSPSPGPGGLGGSVHYATM	Dock7	Dedicator of cytokinesis protein 7	Q8R1A4
27.2035	27.0601	27.0977	27.7517	27.5639	28.4677	28.4136	28.3791	29.1871	27.948	28.127	27.4484	28.5184	28.0811	28.9737	29.0524	29.0292	29.5081	28.5547	27.1297	28.7242	28.5299	28.7247	S	0.999989	1382	SCFEYKGKKVFERMNSLTFKKSKDMRAKLEE	Dock7	Dedicator of cytokinesis protein 7	Q8R1A4
NaN	NaN	NaN	NaN	NaN	NaN	NaN	25.2305	27.3557	NaN	NaN	NaN	NaN	NaN	26.3999	NaN	NaN	NaN	NaN	NaN	NaN	22.4301	NaN	S	0.759151	962	SAESTQAMDRSCNRMSSHTETSSFLQTLTGR	Dock7	Dedicator of cytokinesis protein 7	Q8R1A4
22.7203	22.5607	22.816	22.4569	23.7324	22.2459	23.2503	24.2628	24.7944	25.1241	24.6216	21.9378	23.7706	NaN	24.293	24.1457	23.0599	24.3128	NaN	23.5636	21.1316	23.9947	NaN	S	0.997475	963	AESTQAMDRSCNRMSSHTETSSFLQTLTGRL	Dock7	Dedicator of cytokinesis protein 7	Q8R1A4
25.3738	24.9844	24.8165	25.5634	25.8381	25.9065	26.4041	26.1512	28.4681	29.5187	28.7032	28.6603	28.204	28.9798	29.3806	29.5326	29.187	29.713	29.0212	28.7559	28.3684	28.1467	29.0178	S	0.98647	439	ISTGERKGSWSERRNSSLVGRRSLERTTSGD	Dock7	Dedicator of cytokinesis protein 7	Q8R1A4
NaN	23.4977	NaN	NaN	24.312	24.1603	24.808	24.3642	27.0244	27.4048	26.0113	27.3794	26.9234	25.323	26.6822	25.8462	26.7537	26.8676	27.2661	25.8054	27.8451	27.5763	27.3784	S	0.999613	440	STGERKGSWSERRNSSLVGRRSLERTTSGDD	Dock7	Dedicator of cytokinesis protein 7	Q8R1A4
NaN	NaN	NaN	NaN	NaN	NaN	NaN	NaN	NaN	NaN	NaN	NaN	NaN	NaN	NaN	NaN	NaN	NaN	NaN	NaN	22.5762	25.1011	NaN	S	0.98925	446	GSWSERRNSSLVGRRSLERTTSGDDACNLTS	Dock7	Dedicator of cytokinesis protein 7	Q8R1A4
NaN	NaN	NaN	NaN	NaN	NaN	NaN	NaN	25.2995	NaN	25.3099	24.3385	NaN	25.162	NaN	23.8145	22.7977	NaN	25.0175	23.4832	22.0038	NaN	NaN	S	0.999999	1305	MAIAGTSVPQLTRPGSFLLTSTSGRQHTTFS	Dock7	Dedicator of cytokinesis protein 7	Q8R1A4
25.1354	25.3309	25.1204	25.4754	24.97	25.0034	25.2382	25.4461	25.9792	26.1906	25.8742	25.847	25.7373	25.3713	26.1835	25.6693	25.9282	25.5381	25.6466	23.9001	25.4045	24.9092	26.2497	S	0.996107	30	VAAEVRKQISGQYSGSPQLLKNLNIVGNISH	Dock7	Dedicator of cytokinesis protein 7	Q8R1A4
25.0944	25.1758	26.8286	25.9115	25.2278	25.687	26.4086	26.6979	26.844	27.56	26.061	28.1567	27.1116	27.3251	27.7055	27.8564	27.7019	28.0689	27.0127	27.33	27.7119	28.1459	27.7842	S	1	180	DGSSYQDEQDDLKRRSMSIDDTPRGSWACSI	Dock7	Dedicator of cytokinesis protein 7	Q8R1A4
24.6043	24.711	24.4956	24.5655	24.6481	24.0905	24.4248	24.8884	28.7906	27.6232	24.7008	24.997	24.3889	24.9619	25.2388	24.7128	26.3657	23.6484	24.8974	24.3849	24.7157	26.0019	23.9496	S	0.999999	182	SSYQDEQDDLKRRSMSIDDTPRGSWACSIFD	Dock7	Dedicator of cytokinesis protein 7	Q8R1A4
25.8414	26.2596	26.036	NaN	26.2892	26.0617	25.9884	26.5318	27.0812	26.4833	26.2147	27.1509	26.4301	26.8498	27.3165	26.8597	26.6029	26.6984	26.5286	26.3331	26.6435	26.9358	27.1455	S	1	888	SVHYATMARSAVRPASLNLNRSRSLSNSNPD	Dock7	Dedicator of cytokinesis protein 7	Q8R1A4
NaN	NaN	NaN	NaN	NaN	NaN	NaN	NaN	NaN	NaN	NaN	23.4851	NaN	23.7878	23.3996	NaN	NaN	NaN	NaN	25.3658	NaN	NaN	NaN	S	0.817831	898	AVRPASLNLNRSRSLSNSNPDISGTPTSPDD	Dock7	Dedicator of cytokinesis protein 7	Q8R1A4
NaN	24.7741	25.3935	25.2305	25.5762	25.8569	26.2571	25.6711	26.9928	NaN	27.0423	27.1819	26.7869	26.5969	27.2124	26.2573	27.3162	26.8375	26.8843	24.8983	26.6368	27.0098	27.0043	S	0.999984	900	RPASLNLNRSRSLSNSNPDISGTPTSPDDEV	Dock7	Dedicator of cytokinesis protein 7	Q8R1A4
NaN	22.548	23.8284	24.0288	24.0765	24.1108	24.0088	24.728	26.3644	26.6736	26.4071	26.0199	25.8848	25.6608	25.9093	25.9829	24.0089	25.7959	26.0197	25.0973	24.4642	22.627	24.5124	S	0.999599	452	RNSSLVGRRSLERTTSGDDACNLTSFRPATL	Dock7	Dedicator of cytokinesis protein 7	Q8R1A4
22.8036	22.5441	22.2452	22.2135	23.337	22.9082	23.3369	23.4939	25.3568	26.2058	25.9936	25.5633	25.1388	24.2058	25.3837	25.3023	23.9559	23.9777	23.9994	NaN	22.4564	21.2529	24.8576	S	0.978981	270	EKVEERDLLSDLQDISDSERKTSSAESSSAE	Cdk11b	Cyclin-dependent kinase 11B	P24788
25.1422	25.1273	26.1972	25.1783	NaN	25.4461	25.5669	NaN	NaN	27.7778	27.8226	27.5583	27.7673	27.6102	26.5367	27.095	26.8819	26.4341	27.47	27.2865	26.5646	26.7629	26.7677	S	1	741	TWPAKSEQQRVKRGTSPRPPEGGLGYSQLGD	Cdk11b	Cyclin-dependent kinase 11B	P24788
25.9505	26.3759	21.8206	26.0974	25.9657	NaN	26.135	26.2971	27.1068	26.8051	26.4457	26.5682	25.3709	26.4022	26.2782	26.2333	24.9702	25.5761	26.5916	24.3311	24.3196	23.3405	23.9239	S	0.999995	65	EGELRDHRMEITIRNSPYRREDSMEDRGEED	Cdk11b	Cyclin-dependent kinase 11B	P24788
23.3377	23.9733	23.7815	24.1618	24.631	24.4234	24.9335	24.4216	25.9976	NaN	23.5799	23.7552	24.5747	24.3321	24.7861	24.2528	NaN	NaN	24.6332	22.3215	21.8727	23.5705	23.3213	S	1	47	IKRLKNSDDRDSKRDSLEEGELRDHRMEITI	Cdk11b	Cyclin-dependent kinase 11B	P24788
26.1084	25.9252	25.7406	NaN	NaN	NaN	NaN	NaN	28.9909	29.1202	28.1373	28.0884	27.7597	27.9134	28.4796	27.8644	27.4036	27.8332	29.0462	27.2646	27.1204	25.3076	27.852	S	1	234	REEYSDKGKVGHWSRSPLRPPRERFEMGDNR	Cdk11b	Cyclin-dependent kinase 11B	P24788
25.3489	25.5718	25.3546	25.5894	25.5924	25.6918	26.6313	26.7257	28.3078	27.4651	27.041	27.0452	26.0392	26.6285	27.8226	27.3899	27.3039	27.3829	27.3526	26.9226	26.1555	26.6879	27.558	S	1	251	HLPKLGKPAELQRRVSADGQPFQRGDKVKCL	Mib2	E3 ubiquitin-protein ligase MIB2	Q8R516
26.4429	26.4279	26.2443	26.5605	26.3311	26.7131	26.9647	26.9095	28.3671	28.6771	28.233	27.9939	27.7912	27.9388	28.352	27.5786	27.58	26.7783	27.8399	26.7653	27.1638	24.687	27.6688	S	1	85	DLGESGRLARLGADESEEEGRSFSNVGDPEI	Nrd1	Nardilysin	Q8BHG1
NaN	24.1135	25.1072	25.3764	25.0964	25.391	25.689	26.0747	NaN	24.7582	25.3209	24.8012	25.4763	25.1023	25.3774	25.676	25.7585	25.8455	25.6513	25.2259	25.2017	23.9939	26.0068	S	0.999989	33	SSAMGDGGGSGRGPPSPRPAGPTPRGHGRQP	Kctd2		Q4VBE7
NaN	NaN	NaN	NaN	NaN	NaN	NaN	NaN	NaN	24.6374	24.4473	23.4508	23.3423	NaN	23.5875	NaN	NaN	NaN	NaN	NaN	NaN	23.1565	23.6291	S	0.992596	559	SAPARPLLPFSTGPGSPLFQSQGSPQKGPEL	Gga3	ADP-ribosylation factor-binding protein GGA3	Q8BMI3
23.8138	23.5777	23.6044	23.4252	23.3395	23.3871	NaN	23.4243	NaN	23.0629	21.7976	22.7436	23.0993	22.2499	23.1572	21.8898	23.0321	22.8117	NaN	22.5507	22.218	23.5819	23.3278	S	0.999996	159	VQSDPPIPMDRTLIPSPPPRPKNPVFDDEEK	Gga3	ADP-ribosylation factor-binding protein GGA3	Q8BMI3
NaN	NaN	NaN	NaN	NaN	NaN	NaN	NaN	NaN	25.0459	20.2872	24.4751	23.47	21.8997	22.9077	23.897	23.797	23.449	24.2649	NaN	21.6029	22.8039	24.0161	S	1	4613	PYLPPKTMTNNLEKNSQEQLLDAAHHRHWPG	Kiaa1109;4932438A13Rik	Uncharacterized protein KIAA1109	A2AAE1
NaN	NaN	NaN	NaN	NaN	NaN	NaN	NaN	24.1199	24.3775	23.9582	24.6439	25.1551	NaN	24.9354	24.9225	25.4224	24.5241	24.3277	23.2521	NaN	23.7916	24.4585	S	1	1355	QFSSDVSRSDENVLDSPKQRRSFGSFPYTPS	Kiaa1109	Uncharacterized protein KIAA1109	A2AAE1
27.8647	19.5492	NaN	NaN	27.8656	27.865	27.6367	27.8792	21.201	NaN	25.2158	25.7856	25.7572	25.2597	25.5235	25.9673	26.0621	25.9826	25.8438	23.8192	22.4912	24.838	24.1898	S	1	3653	IGETDELPEIRVDAASPGPRVTFNIQDTFPE	Kiaa1109;4932438A13Rik	Uncharacterized protein KIAA1109	A2AAE1
NaN	NaN	NaN	NaN	NaN	NaN	NaN	NaN	25.8551	25.6118	25.4325	26.0176	25.4894	25.2814	24.9389	25.6343	24.8155	NaN	NaN	24.0253	24.3545	25.5674	24.6623	S	0.996478	2755	EPTCRVVFENEQDNNSLTKTQRKRSLVTSEP	Kiaa1109	Uncharacterized protein KIAA1109	A2AAE1
24.6443	24.9172	24.7694	24.476	24.5655	24.3556	25.0557	22.0574	NaN	NaN	24.5429	25.8883	24.4614	25.5554	25.0403	NaN	24.5533	NaN	NaN	25.2957	25.4791	25.5871	24.4472	S	0.93618	2603	TQTDIKLSRYTAGSASPTPTFKTRKHRDFRS	Kiaa1109	Uncharacterized protein KIAA1109	A2AAE1
NaN	NaN	NaN	NaN	NaN	NaN	NaN	NaN	NaN	22.391	22.7849	23.1226	23.3176	23.0692	23.6168	NaN	NaN	NaN	NaN	22.8362	22.1727	23.7526	NaN	S	0.989028	266	GDQSAINELMQMRLRSGGTEGLLAEKLEALI	Srp68	Signal recognition particle subunit SRP68	Q8BMA6
22.971	22.8164	23.5275	22.5285	22.5644	23.4598	NaN	23.5479	24.9384	25.5029	24.7546	24.9971	24.8954	24.6742	25.3539	25.0312	25.1978	24.9004	24.8818	24.535	24.663	25.1519	25.2451	S	1	840	PRVTGKVGETREKAASFLNADGPKDSLYVAV	Sh3pxd2b	SH3 and PX domain-containing protein 2B	A2AAY5
22.5242	23.2034	23.7227	NaN	NaN	22.6492	22.933	23.4863	NaN	22.1059	22.4104	24.7413	22.541	23.1616	23.6002	23.6465	23.1424	21.8773	23.3499	21.2715	24.0826	24.3898	23.4434	S	0.948695	551	LLERERQKMEPLRGSSPKPPGMILPMIPAKH	Sh3pxd2b	SH3 and PX domain-containing protein 2B	A2AAY5
NaN	NaN	24.5318	24.3488	24.5841	24.623	24.5791	24.3781	26.166	26.3041	27.3316	27.1904	26.3423	27.6369	26.4551	26.8242	25.0976	25.0036	27.146	25.8302	25.4929	23.0887	26.051	S	1	528	DPTQEEKPSLPPRKESIIKSEEELLERERQK	Sh3pxd2b	SH3 and PX domain-containing protein 2B	A2AAY5
NaN	NaN	23.7499	NaN	NaN	NaN	NaN	NaN	NaN	21.3692	21.8335	NaN	22.9483	NaN	22.4161	22.2888	23.4656	22.6845	23.0013	NaN	NaN	NaN	23.4084	S	0.859605	769	VVPPRRPPPPKKTSSSPLSCRPLPEVRGAQR	Sh3pxd2b	SH3 and PX domain-containing protein 2B	A2AAY5
25.7524	25.7839	25.1295	25.4867	25.8188	26.5579	26.3047	26.117	27.7975	27.23	26.286	26.5294	27.4009	NaN	26.5586	27.4568	26.4009	27.0993	27.4099	27.0822	22.2763	27.7187	27.3048	S	0.996518	291	KKNSGEPLPPKLGPSSPAHSGALDLDGVSRH	Sh3pxd2b	SH3 and PX domain-containing protein 2B	A2AAY5
25.8017	25.7917	26.0833	27.2388	27.0382	25.8371	27.2276	26.6323	NaN	24.9125	24.5835	24.7301	23.99	NaN	26.8661	26.186	26.9883	25.6659	25.668	23.7148	24.578	26.5463	26.1429	S	1	672	HVDIYNLRSKLRPAKSQEKALLDGESHHAAG	Sh3pxd2b	SH3 and PX domain-containing protein 2B	A2AAY5
NaN	NaN	NaN	23.47	23.3193	23.8633	24.12	NaN	NaN	NaN	NaN	NaN	NaN	NaN	NaN	NaN	NaN	NaN	NaN	NaN	NaN	NaN	NaN	S	0.998419	118	VGADGSSAEPRGRASSLCGPARQRTGGQRNS	Arhgap27	Rho GTPase-activating protein 27	A2AB59
24.1888	23.8975	23.8257	23.9497	24.4893	23.8275	24.3244	23.9631	NaN	NaN	NaN	NaN	NaN	NaN	NaN	NaN	NaN	NaN	NaN	NaN	NaN	NaN	NaN	S	1	155	ACLYVRPAAPVRPAQSLDDLARGGTAPPAGL	Arhgap27	Rho GTPase-activating protein 27	A2AB59
NaN	NaN	NaN	NaN	NaN	NaN	NaN	NaN	23.539	25.1617	24.8781	23.2512	24.4234	23.3491	23.7047	22.7135	NaN	22.5029	23.1155	23.3318	21.8656	21.9991	NaN	S	1	85	PLAKMAEMARRLHPPSPVPQGVCAAHREPLT	Trim11	E3 ubiquitin-protein ligase TRIM11	Q99PQ2
24.2667	24.3182	24.4104	23.789	24.3269	24.3699	24.7005	24.5263	26.4663	25.8234	25.7469	26.7621	25.9517	25.9984	26.7031	NaN	24.6582	24.8545	25.9312	24.3872	26.0847	25.5488	26.3692	S	0.988683	382	ERTCMQFSIRRPKLPSSEIHPEESLYRRLDV	Tbc1d16		A2ABG4
NaN	NaN	NaN	NaN	NaN	NaN	NaN	NaN	23.9989	NaN	NaN	NaN	NaN	NaN	NaN	NaN	21.6121	NaN	23.0445	NaN	NaN	NaN	NaN	S	0.88923	1133	PQVSGPSPATRLPGMSPANPSLHSPVPDVSH	Med14	Mediator of RNA polymerase II transcription subunit 14	A2ABV5
NaN	NaN	NaN	NaN	NaN	NaN	NaN	NaN	NaN	NaN	22.5059	24.2077	NaN	NaN	NaN	NaN	NaN	NaN	NaN	21.8811	22.7609	NaN	NaN	S	0.979238	1141	ATRLPGMSPANPSLHSPVPDVSHSPRAGTSS	Med14	Mediator of RNA polymerase II transcription subunit 14	A2ABV5
NaN	NaN	NaN	NaN	NaN	NaN	NaN	NaN	24.7166	25.6332	23.8037	25.7371	24.4057	NaN	25.1023	23.4431	24.1615	NaN	NaN	24.2109	24.1096	NaN	NaN	S	0.791386	1147	MSPANPSLHSPVPDVSHSPRAGTSSQTMPTN	Med14	Mediator of RNA polymerase II transcription subunit 14	A2ABV5
NaN	NaN	NaN	NaN	NaN	NaN	NaN	NaN	25.3446	25.0191	24.5795	25.0789	24.2728	NaN	24.3594	23.9382	NaN	21.9107	23.8857	23.6105	23.9949	24.062	23.9696	S	0.941395	1149	PANPSLHSPVPDVSHSPRAGTSSQTMPTNMP	Med14	Mediator of RNA polymerase II transcription subunit 14	A2ABV5
NaN	NaN	NaN	NaN	NaN	NaN	NaN	NaN	24.2299	23.936	24.396	23.3727	24.4819	24.0819	24.4332	24.3889	24.3699	22.4105	24.1911	22.4623	22.6116	24.6923	24.2154	S	1	391	STRMDSNFGLAGLPGSPKKRVRIECKCGTTA	Suv39h1	Histone-lysine N-methyltransferase SUV39H1	O54864
NaN	NaN	23.6916	23.5897	23.6273	23.9437	24.1077	23.9077	25.0245	24.9173	23.2491	25.0204	NaN	NaN	NaN	NaN	23.559	21.7194	24.5987	23.045	23.4502	23.2978	25.0915	S	0.972599	359	CLVDAFLGISRPRSDSAPPTPVNRLSMPQSA	Ralgapb	Ral GTPase-activating protein subunit beta	Q8BQZ4
NaN	NaN	NaN	NaN	NaN	NaN	NaN	NaN	NaN	NaN	22.8031	NaN	NaN	NaN	NaN	NaN	23.4178	23.1837	NaN	22.4948	22.7279	23.6159	NaN	S	0.997656	877	ASPTNKGMHMHQVGGSPPASSTSSCSLTNDV	Rptor	Regulatory-associated protein of mTOR	Q8K4Q0
26.7046	NaN	27.2441	26.8112	27.1561	26.951	26.993	27.3746	28.9306	28.6645	28.5511	28.9637	28.3393	28.1603	28.7213	28.5989	27.9152	27.302	28.459	28.1103	28.3837	28.446	28.5553	S	0.999948	863	QRILDTSSLTQSAPASPTNKGMHMHQVGGSP	Rptor	Regulatory-associated protein of mTOR	Q8K4Q0
NaN	NaN	NaN	NaN	NaN	NaN	NaN	NaN	24.1601	24.0848	23.683	22.9518	NaN	NaN	23.7199	23.2648	23.2327	23.2378	NaN	22.2987	21.3899	NaN	23.2112	S	0.998062	696	VALQFMEEEKNYPLPSPAATEGGSLTPVRDS	Rptor	Regulatory-associated protein of mTOR	Q8K4Q0
24.4372	24.1455	23.7656	23.6295	24.2167	23.842	24.3066	24.6314	NaN	NaN	NaN	NaN	NaN	NaN	NaN	NaN	NaN	NaN	NaN	NaN	NaN	NaN	NaN	S	0.99016	722	PVRDSPCTPRLRSVSSYGNIRAVTTARNLNK	Rptor	Regulatory-associated protein of mTOR	Q8K4Q0
22.4213	22.6627	23.1472	23.887	23.5651	23.6219	23.7971	24.3694	NaN	26.1629	22.1081	NaN	25.3372	25.1107	25.8386	21.7788	24.6618	24.224	NaN	25.0416	25.5631	25.2198	26.1387	S	1	33	APAPAAERKKSHRAPSPARPKDVAGWSLAKG	Soga1		A2ACV6
22.786	22.1332	23.3848	NaN	NaN	22.7065	NaN	22.9469	24.8	26.3111	24.7571	25.8648	25.2798	24.4052	25.7229	25.3914	24.8543	25.3881	24.0121	23.7638	NaN	NaN	26.2303	S	0.999707	1536	GIVQEFFRNVCGRAPSPTTAAGEESCKKPEP	Soga1	Protein SOGA1;N-terminal form;C-terminal 80 kDa form	A2ACV6
NaN	NaN	NaN	NaN	NaN	NaN	NaN	NaN	NaN	23.6369	23.023	NaN	24.3405	NaN	24.616	23.0979	23.0418	NaN	23.246	23.7555	23.4581	23.8541	23.8135	S	0.82686	1553	TTAAGEESCKKPEPLSPASYHQPEGVSRILN	Soga1	Protein SOGA1;N-terminal form;C-terminal 80 kDa form	A2ACV6
NaN	NaN	NaN	NaN	NaN	NaN	NaN	NaN	NaN	25.6647	23.2869	23.0101	NaN	NaN	NaN	20.7486	18.9506	NaN	25.6931	25.0571	25.7558	23.8105	NaN	S	0.991442	1632	LASCFIRPSRNTIRHSPSKCRLHPSESGWGG	Soga1	Protein SOGA1;N-terminal form;C-terminal 80 kDa form	A2ACV6
NaN	NaN	NaN	NaN	NaN	NaN	NaN	NaN	NaN	NaN	NaN	22.3017	NaN	NaN	NaN	23.0452	22.3235	NaN	NaN	NaN	NaN	NaN	23.7155	S	0.77836	140	ASEEARQLGLELALSSDAESAAGGPAGTRTG	Soga1		A2ACV6
NaN	NaN	NaN	22.6691	NaN	NaN	NaN	23.514	NaN	NaN	NaN	NaN	NaN	NaN	NaN	NaN	NaN	NaN	NaN	NaN	NaN	NaN	NaN	S	0.835922	1160	VSEAELGGTGLKRTKSVSSMSEFESLLDCSP	Soga1	Protein SOGA1;N-terminal form;C-terminal 80 kDa form	A2ACV6
26.0975	25.8775	26.5391	26.2014	26.2504	26.251	26.6211	26.5385	26.6962	25.9766	26.0612	26.4248	25.8396	25.776	26.3336	25.8654	26.1547	25.7779	25.8633	25.3014	26.1085	26.0684	26.0167	S	0.999993	1251	RSYTAPDKTGIRVYYSPPVARRLGVPVVHDK	Soga1	Protein SOGA1;N-terminal form;C-terminal 80 kDa form	A2ACV6
NaN	NaN	NaN	NaN	NaN	NaN	NaN	NaN	NaN	24.1164	23.7662	23.9413	23.7096	23.6091	23.8358	23.6673	24.2311	23.6821	23.8443	NaN	22.4211	23.6125	23.8351	S	0.99781	622	ETPKESTVLGDSEEPSE______________	Chm	Rab proteins geranylgeranyltransferase component A 1	Q3UR39
NaN	NaN	NaN	NaN	NaN	NaN	NaN	NaN	NaN	24.1905	24.4586	23.8845	24.2142	23.578	24.529	24.2066	24.1037	22.7647	NaN	NaN	NaN	NaN	NaN	S	0.99961	165	EAACLPTAEESLSTRSCELPAEQSQCTGPES	Chm		Q3UR39
NaN	NaN	NaN	NaN	NaN	NaN	NaN	NaN	22.1205	NaN	20.5489	23.8362	22.358	NaN	23.5665	20.5971	NaN	NaN	21.4817	NaN	NaN	NaN	24.0158	S	1	960	AKTQNTHHARKKRHNSGLVDKDCVLSATIKQ	Stil	SCL-interrupting locus protein homolog	Q60988
NaN	21.3908	21.8205	21.8081	22.3111	NaN	22.0211	22.0632	NaN	NaN	NaN	NaN	NaN	NaN	NaN	NaN	NaN	NaN	NaN	NaN	NaN	NaN	NaN	S	0.994565	580	ALSSAATMERKFRRDSLFCPDELDSLFSYFD	Acap3		Q6NXL5
NaN	NaN	NaN	NaN	NaN	NaN	NaN	NaN	26.96	27.7611	27.6869	27.8827	27.5267	27.0482	27.9066	27.4803	27.5578	27.3207	26.5968	27.2922	27.4532	27.3769	27.5592	S	1	1660	ASSAPEKAEEAAEAPSPAGEKPAEPAPVSEE	Spen	Msx2-interacting protein	A2ADB1
NaN	NaN	NaN	NaN	NaN	NaN	NaN	NaN	25.3849	25.2036	23.8722	24.0595	24.9425	24.6275	24.8945	24.8287	23.871	24.9553	NaN	NaN	23.1065	NaN	23.4781	S	0.926537	1373	LRKRSVRDLEPGEVPSDSDEDAEHRSQSPRA	Spen	Msx2-interacting protein	A2ADB1
NaN	NaN	NaN	NaN	NaN	NaN	NaN	NaN	NaN	23.7011	23.7691	24.5912	23.6853	23.4539	24.6247	24.2041	24.2177	24.1992	23.8587	22.356	24.2749	24.154	24.3868	S	0.999963	2106	AAGQAADKEAGPAAASPQESESPQKGSGSSP	Spen	Msx2-interacting protein	A2ADB1
NaN	NaN	NaN	NaN	NaN	NaN	NaN	NaN	24.6287	25.7199	NaN	24.7377	23.2781	NaN	24.3627	NaN	NaN	23.8226	NaN	NaN	25.0336	24.2307	NaN	S	0.800017	2110	AADKEAGPAAASPQESESPQKGSGSSPQLAN	Spen	Msx2-interacting protein	A2ADB1
NaN	NaN	NaN	NaN	NaN	NaN	NaN	NaN	NaN	NaN	25.1539	24.5465	23.6378	24.0036	24.7112	25.2335	25.3096	23.9461	24.4198	24.3154	NaN	24.0469	25.3618	S	0.976243	2112	DKEAGPAAASPQESESPQKGSGSSPQLANNP	Spen	Msx2-interacting protein	A2ADB1
25.8171	24.8402	25.6011	26.4051	26.4585	26.4642	26.7418	26.9273	26.6585	27.3562	27.3758	26.7034	25.991	26.0879	25.1411	21.5102	NaN	24.7231	26.8207	24.9015	25.3115	26.798	24.4782	S	1	1271	SVRHGSFHDDDDPRGSPRLVSVKGSPKGDEK	Spen	Msx2-interacting protein	A2ADB1
21.6249	21.7365	22.3673	23.4353	22.7403	22.78	23.049	23.4394	NaN	26.858	25.2511	26.4873	24.5362	25.5589	24.982	24.1433	25.4144	NaN	NaN	25.0043	25.6082	25.6321	24.0602	S	0.998587	1000	SGLKIEKQKPEIKKTSPETEDTRILLKKQPD	Spen	Msx2-interacting protein	A2ADB1
24.185	24.6482	24.604	23.8095	23.6316	24.1408	24.2714	24.3572	NaN	26.4137	26.1358	26.5644	23.6267	NaN	26.7869	26.0283	26.3201	26.0927	25.6147	25.2592	25.6721	25.4427	27.0623	S	1	1055	RESKKTKLERLNSALSPKDCQDPAAVSAGSG	Spen	Msx2-interacting protein	A2ADB1
24.1084	23.9443	24.3482	23.8789	24.3006	24.3307	24.8582	24.4992	26.6395	26.1238	26.2611	25.3812	25.8608	25.9407	26.3066	25.8825	26.2717	25.0548	25.89	25.3876	26.0467	26.2462	25.9889	S	1	2467	AKLPPPVIPGGVPHQSPPPKVTEWITRQEEP	Spen	Msx2-interacting protein	A2ADB1
24.1241	23.3073	22.9075	24.0488	24.5387	24.376	24.8683	24.6922	25.9062	NaN	24.3221	25.4147	23.2822	26.4735	26.4715	25.5835	26.3696	25.8035	26.1662	24.4969	27.1044	26.1771	NaN	S	1	1280	DDDPRGSPRLVSVKGSPKGDEKGLPYPNAAV	Spen	Msx2-interacting protein	A2ADB1
23.1982	NaN	23.1139	23.6739	24.1688	23.8748	24.0564	24.003	NaN	NaN	NaN	NaN	NaN	NaN	NaN	NaN	NaN	NaN	NaN	NaN	NaN	NaN	NaN	S	0.999285	625	DFYEMLTERREERRGSYEYSQERTYYENVRT	Spen	Msx2-interacting protein	A2ADB1
24.9369	24.677	NaN	NaN	NaN	25.5075	25.7422	26.1109	NaN	27.1811	26.4723	26.498	26.6406	26.4034	26.555	26.4905	26.0537	25.9143	27.0052	25.8935	20.7898	26.9913	NaN	S	1	727	ESDRDHERRPIERSQSPVHLRRPQSPGVSPA	Spen	Msx2-interacting protein	A2ADB1
20.7405	23.854	NaN	24.3735	24.0084	24.1642	24.4628	24.902	NaN	26.3728	26.5742	27.2443	NaN	24.7784	NaN	25.1834	25.0656	24.0131	NaN	26.9063	27.2468	27.2519	NaN	S	0.999868	736	PIERSQSPVHLRRPQSPGVSPAHSERLPSDS	Spen	Msx2-interacting protein	A2ADB1
24.633	24.1538	24.7511	NaN	25.922	25.3741	26.7234	26.3017	25.8802	NaN	NaN	23.4784	NaN	NaN	24.3863	NaN	NaN	NaN	NaN	NaN	NaN	NaN	NaN	S	1	188	PRERTLQHGLYYTSRSRSPNRFDAHDPRYEP	Spen	Msx2-interacting protein	A2ADB1
NaN	NaN	NaN	NaN	NaN	NaN	NaN	NaN	NaN	23.6246	23.8701	NaN	22.4377	NaN	NaN	23.4599	21.7288	23.7458	24.5196	23.6517	NaN	NaN	NaN	S	1	190	ERTLQHGLYYTSRSRSPNRFDAHDPRYEPRA	Spen	Msx2-interacting protein	A2ADB1
NaN	22.4656	NaN	NaN	NaN	22.8091	23.025	21.8248	23.9475	NaN	22.014	NaN	24.0362	24.6967	24.4808	24.4246	24.499	23.1163	23.745	NaN	23.754	24.1981	NaN	S	1	423	WCSHADPPEQSFRAGSPGEAPEKPPFCDFSE	Plekhm2	Pleckstrin homology domain-containing family M member 2	Q80TQ5
NaN	NaN	NaN	NaN	NaN	NaN	NaN	NaN	22.4095	25.7	26.2628	26.2648	25.6415	25.9132	25.0214	25.8188	25.4427	25.0791	25.7489	24.7807	24.2511	24.1677	25.2831	S	0.999999	482	RETVAEPPKVPERAGSPKPEANLSVEAEEIG	Inadl	InaD-like protein	Q63ZW7
NaN	22.2909	NaN	NaN	22.8765	NaN	20.4139	22.9131	NaN	NaN	NaN	NaN	NaN	NaN	NaN	NaN	NaN	NaN	NaN	NaN	NaN	NaN	NaN	S	0.999999	902	ESNPPPPHIREAAPASPVLELQAGTQWLHAN	Inadl	InaD-like protein	Q63ZW7
NaN	NaN	NaN	NaN	NaN	NaN	NaN	NaN	24.7056	24.3398	23.5147	NaN	24.1831	24.1598	24.5069	24.4578	24.4675	23.3348	24.1085	22.0712	23.8991	24.0751	24.3227	S	1	647	PFTLVCCRRLFDDEASVDEPRTMEPALLEAE	Inadl	InaD-like protein	Q63ZW7
23.0065	22.8197	22.882	NaN	NaN	22.7193	22.9763	NaN	NaN	NaN	NaN	NaN	NaN	NaN	NaN	NaN	NaN	NaN	NaN	NaN	NaN	NaN	NaN	S	1	194	QQDRARREQERIRLFSADPFDLEAQAKIEED	Ddi2	Protein DDI1 homolog 2	A2ADY9
23.847	24.075	23.8359	24.0473	24.2515	24.5829	24.2874	24.0056	24.4252	24.482	24.4232	25.2117	24.2433	25.7432	24.436	24.1748	25.0217	24.3198	24.2129	22.5924	22.9164	24.8841	25.4227	S	1	46	TSHSGSLALGLPHLPSPKQRAKFKRAGKEKC	Ccdc28b	Coiled-coil domain-containing protein 28B	Q8CEG5
NaN	NaN	NaN	NaN	NaN	NaN	NaN	NaN	NaN	NaN	22.5873	22.1221	23.2196	23.2508	22.2147	23.034	NaN	23.0144	NaN	NaN	22.6631	23.5174	21.9034	S	0.999998	53	MDGKCKEIAEELFSRSLAESELRSAPYEFPE	Ampd2	AMP deaminase 2	Q9DBT5
27.3154	26.8415	26.6566	26.7119	27.0138	26.9621	27.0392	27.0987	27.2559	25.4826	26.6186	27.1556	27.0163	26.8191	27.0515	26.7734	26.9099	26.5605	27.3278	25.9436	26.6806	27.1813	26.1966	S	1	87	IEQLEERRQRLERQISQDVKLEPDILLRAKQ	Ampd2	AMP deaminase 2	Q9DBT5
24.6769	NaN	24.8298	24.5236	25.0226	25.2622	25.1546	25.1446	NaN	24.7424	23.4201	NaN	23.4893	NaN	23.8554	23.2107	22.2809	NaN	NaN	24.1765	24.6445	24.4027	24.9045	S	0.999998	12	____MASEARSGLGASPLQSARSLPGNAPCL	Ampd2	AMP deaminase 2	Q9DBT5
NaN	NaN	NaN	23.1373	NaN	23.0774	NaN	22.8215	23.8882	23.609	23.7457	23.5003	23.0901	23.6839	23.9109	22.6025	23.2535	22.5268	23.7772	23.2171	23.4039	NaN	22.0343	S	0.999993	511	GGGGPVRLRSTSRKDSISEDEMVLRERSYDY	Wdtc1	WD and tetratricopeptide repeats protein 1	Q80ZK9
NaN	NaN	NaN	NaN	NaN	NaN	NaN	NaN	23.6681	24.2627	23.8524	23.9838	22.8708	23.6857	24.0699	NaN	NaN	NaN	NaN	22.8986	23.116	22.2352	23.9014	S	0.998661	227	YDIRMIHNHRKSMRQSPSAGVHTFCDRQKPL	Wdtc1	WD and tetratricopeptide repeats protein 1	Q80ZK9
NaN	NaN	NaN	NaN	NaN	NaN	NaN	NaN	24.9089	NaN	23.0454	NaN	NaN	23.6346	23.6571	24.6089	24.899	24.6906	25.1969	23.6787	24.8486	23.3881	NaN	S	0.790502	71	PGRWGGRSAENPPSGSVRKTRKNKQKAPGNG	Morf4l2	Mortality factor 4-like protein 2	Q9R0Q4
23.3529	23.3934	23.9977	NaN	25.2448	25.4611	25.6269	25.3917	NaN	NaN	NaN	NaN	NaN	NaN	NaN	NaN	NaN	NaN	NaN	NaN	NaN	NaN	NaN	S	0.999954	120	VPRKAKRKTDRGTDDSPKNSQEDLQDRHVSS	Tceal5;Tceal6;Tceal3	Transcription elongation factor A protein-like 5;Transcription elongation factor A protein-like 3	Q8CCT4
NaN	NaN	NaN	NaN	NaN	NaN	NaN	NaN	26.1913	26.2404	25.3906	20.735	26.56	26.5508	25.8733	26.1979	26.552	26.8212	NaN	24.7923	24.9315	NaN	22.8345	S	1	213	RTSPRAPANIQVFFDSGALKASVSWTPTEGA	Fndc7	Fibronectin type III domain-containing protein 7	A2AED3
NaN	NaN	23.4995	24.6821	24.7177	24.9887	25.5965	25.8156	25.7767	NaN	25.4862	25.8797	25.246	24.6293	25.8532	NaN	25.4918	NaN	25.8235	NaN	26.1315	25.5635	26.1473	S	1	354	LLVHSAPSTTPKHCASPVLNRASLRERFHSD	Spata6	Spermatogenesis-associated protein 6	Q3U6K5
22.343	NaN	23.4065	NaN	NaN	NaN	24.7495	24.9383	NaN	25.8779	25.0515	NaN	25.7218	24.8082	24.7735	23.2628	24.5441	24.928	NaN	NaN	NaN	24.4888	25.4211	S	1	265	ETDKPPFVIRHVDPPSPRTDNFFGSPGRDCE	Spata6	Spermatogenesis-associated protein 6	Q3U6K5
20.3689	20.4387	21.5769	22.527	NaN	21.8792	22.0862	22.6982	NaN	22.4647	19.1968	22.0763	22.6893	22.99	23.4615	23.0543	21.3068	21.747	21.8935	19.6474	21.9204	NaN	23.3209	S	1	307	PHIGCCRSKDYKVIRSPHGRDFEDPFERCEE	Spata6	Spermatogenesis-associated protein 6	Q3U6K5
NaN	NaN	NaN	NaN	NaN	NaN	NaN	NaN	NaN	NaN	NaN	21.8184	22.6974	22.6525	NaN	23.4005	23.5885	NaN	23.7764	NaN	24.072	24.123	22.2375	S	0.999849	107	ALKDRERAGTGPGRPSPRGKPSPRRETFVLK	Psrc1	Proline/serine-rich coiled-coil protein 1	Q9D0P7
NaN	NaN	NaN	23.4732	23.794	NaN	NaN	23.435	NaN	NaN	NaN	NaN	NaN	NaN	NaN	NaN	NaN	NaN	NaN	NaN	NaN	NaN	NaN	S	0.999989	65	SNPNEVAPALQGVRFSLGPLSPEKLEEILDE	Psrc1	Proline/serine-rich coiled-coil protein 1	Q9D0P7
23.9221	22.7946	23.3137	24.0565	24.1646	23.7374	24.4643	24.4003	NaN	22.6117	24.5814	22.7739	23.5727	23.2591	21.371	23.0958	21.7761	22.213	NaN	NaN	NaN	NaN	NaN	S	1	70	VAPALQGVRFSLGPLSPEKLEEILDEANRLA	Psrc1	Proline/serine-rich coiled-coil protein 1	Q9D0P7
21.3222	NaN	21.7352	NaN	23.2548	22.5416	NaN	NaN	24.504	22.4549	22.8345	23.4919	23.1254	23.1335	22.9803	21.74	21.8223	NaN	23.5518	22.1748	23.0442	22.3746	NaN	S	0.839238	189	SPTCNLFPASKSPGRSPLAQPILPPRRKTGF	Psrc1	Proline/serine-rich coiled-coil protein 1	Q9D0P7
23.4187	22.5228	22.857	22.9057	23.3357	22.7242	23.1188	23.4096	NaN	NaN	NaN	NaN	NaN	NaN	NaN	NaN	NaN	NaN	NaN	NaN	NaN	NaN	NaN	S	0.995087	819	ALDSTSHAKSGYHDDSDEDLLE_________	Sort1	Sortilin	Q6PHU5
23.2468	22.0918	22.8767	23.5418	23.8593	23.9054	NaN	24.5235	NaN	NaN	NaN	NaN	NaN	23.8827	24.0211	23.8987	23.6146	23.246	24.0808	NaN	NaN	24.5538	23.5308	S	0.891625	664	AFRTYYQRATQNPSTSPQPAKSPPSVNSVAA	Ofd1	Oral-facial-digital syndrome 1 protein homolog	Q80Z25
NaN	NaN	NaN	NaN	NaN	NaN	NaN	NaN	24.2538	NaN	21.8281	23.1684	22.7022	22.0148	21.7061	NaN	23.1441	22.5598	NaN	NaN	NaN	NaN	NaN	S	0.960157	267	TCQAKNEALISQEKNSLERIKKHREMESKEI	Ofd1	Oral-facial-digital syndrome 1 protein homolog	Q80Z25
24.5649	NaN	NaN	25.0145	25.022	NaN	25.4717	20.8378	25.3942	24.1822	24.3704	24.3783	24.8573	24.3187	25.1682	24.8881	24.4154	25.316	25.3321	24.2638	24.8708	25.062	25.4026	S	0.998232	791	PAASPSPCPERTAQASPVPSRHSFSGLPEQN	Ofd1	Oral-facial-digital syndrome 1 protein homolog	Q80Z25
NaN	NaN	NaN	NaN	NaN	NaN	NaN	NaN	NaN	NaN	NaN	NaN	NaN	NaN	NaN	NaN	NaN	NaN	23.1308	NaN	NaN	NaN	NaN	S	0.89699	775	LHMTSSSPLLDRVSASPAASPSPCPERTAQA	Ofd1	Oral-facial-digital syndrome 1 protein homolog	Q80Z25
NaN	NaN	NaN	NaN	NaN	NaN	NaN	NaN	NaN	NaN	23.3603	24.2042	24.2705	NaN	NaN	23.5736	23.0032	22.9862	NaN	23.3987	24.0981	23.3992	NaN	S	0.862555	527	MQGASMQGGSQPGGFSPGQSQVTPQDHEKAA	Cstf2	Cleavage stimulation factor subunit 2	Q8BIQ5
25.2067	25.0713	24.63	24.6537	25.0038	25.4046	25.1486	25.2523	23.581	26.4995	26.097	25.392	25.4093	26.0415	24.9496	26.1486	NaN	NaN	NaN	25.321	24.4227	NaN	26.5758	S	0.949606	58	QVRSGTSEKKEVSPDSSEAEELSDCLHRLDS	Clcc1	Chloride channel CLIC-like protein 1	Q99LI2
NaN	NaN	NaN	NaN	NaN	NaN	NaN	NaN	19.3028	NaN	17.514	NaN	NaN	NaN	21.8643	22.5431	24.3524	23.7087	NaN	NaN	NaN	NaN	22.1801	S	1	429	KMHASKRDALRQRFHSGNKSPEVLRAFDLPD	Clcc1	Chloride channel CLIC-like protein 1	Q99LI2
25.7851	26.0416	25.8553	26.3384	26.6034	26.6246	NaN	27.9258	27.7696	27.1089	25.6514	26.6964	26.2312	26.0506	27.0002	25.797	27.2457	27.2259	NaN	26.7135	26.9277	26.822	26.9577	S	1	433	SKRDALRQRFHSGNKSPEVLRAFDLPDTEAQ	Clcc1	Chloride channel CLIC-like protein 1	Q99LI2
NaN	NaN	NaN	NaN	NaN	NaN	NaN	NaN	24.9054	NaN	23.5889	23.0214	23.3502	23.7684	23.9162	23.6827	24.0285	23.3924	24.4168	23.0509	23.6826	22.8708	23.2479	S	1	64	ERDRDSGVVGARPRASPPPQGPLPGPPGALH	Otud5	OTU domain-containing protein 5	Q3U2S4
23.7115	23.7135	23.6504	23.8947	23.9096	23.4619	23.7951	23.8864	25.7621	25.6169	25.045	25.0281	24.865	25.0129	24.6194	25.138	24.8965	24.874	24.9113	NaN	23.8969	22.6683	24.8944	S	0.972422	503	PGTSSQFSAGGDRATSPLVSLYPALECRALI	Otud5	OTU domain-containing protein 5	Q3U2S4
NaN	NaN	NaN	NaN	NaN	NaN	NaN	NaN	24.6064	NaN	NaN	NaN	NaN	NaN	23.883	24.2523	23.9144	23.9286	NaN	24.104	22.8381	NaN	NaN	S	0.999987	545	VGGLSGGALSPLRAASDPLLSSVSPAVSKAS	Tfe3	Transcription factor E3	Q64092
26.4575	26.2296	26.8162	26.0975	26.3165	26.5783	26.5785	26.7081	27.9421	26.8054	27.2892	27.3732	27.5752	27.2741	26.3843	26.3525	27.1373	26.1589	27.1667	26.3303	26.6623	27.5542	27.7346	S	0.998313	553	LSPLRAASDPLLSSVSPAVSKASSRRSSFSM	Tfe3	Transcription factor E3	Q64092
24.4044	23.7465	23.2222	24.8006	23.2437	24.7332	25.1568	24.5449	25.1801	25.1999	24.5907	24.4411	25.1489	24.2807	23.6014	24.2549	24.2795	23.2733	24.9318	23.1996	24.6143	24.4112	24.8205	S	0.880925	565	SSVSPAVSKASSRRSSFSMEEES________	Tfe3	Transcription factor E3	Q64092
NaN	NaN	24.4584	NaN	23.9761	NaN	NaN	NaN	NaN	NaN	NaN	NaN	NaN	NaN	NaN	NaN	NaN	NaN	NaN	NaN	NaN	NaN	NaN	S	0.899315	567	VSPAVSKASSRRSSFSMEEES__________	Tfe3	Transcription factor E3	Q64092
24.1337	23.9907	23.3491	23.4424	23.9728	23.1181	23.8992	23.6726	NaN	NaN	24.4808	24.8002	24.2273	NaN	24.8359	NaN	NaN	24.4429	25.1172	23.9443	24.4852	25.3433	24.9001	S	0.979552	657	KEKESSAIPARSLSSSPQAQPPRPAELSDEE	Gripap1	GRIP1-associated protein 1	Q8VD04
27.099	26.2038	26.545	26.9526	26.7717	26.5106	26.9783	27.218	27.4177	26.3171	25.0939	27.2348	25.3967	26.2372	26.1533	26.4842	27.1841	27.4562	NaN	26.8556	27.7772	NaN	27.5479	S	0.996678	7	_________MASQRHSGPSSYKVGTMSEKFD	Fhl1		A2AEX8
NaN	NaN	NaN	NaN	NaN	NaN	NaN	NaN	NaN	NaN	NaN	27.7733	27.0999	26.6012	25.8301	25.8902	26.6572	26.6739	27.2535	28.9586	29.0937	27.674	28.0196	S	0.999847	114	KDGKILCNKCATREDSPRCKGCFKAIVAGDQ	Fhl1	Four and a half LIM domains protein 1	A2AEX8
NaN	NaN	NaN	NaN	NaN	NaN	NaN	NaN	NaN	23.8778	24.3003	24.7326	23.8705	24.6121	24.2457	23.3237	24.0111	25.1725	23.9093	24.1175	24.8692	25.3488	24.3172	S	1	272	EGQSWHDYCFHCKKCSVNLANKRFVFHNEQV	Fhl1	Four and a half LIM domains protein 1	A2AEX8
NaN	NaN	NaN	NaN	NaN	NaN	NaN	NaN	25.2189	23.7496	22.3447	23.9426	24.2838	24.3402	23.9434	24.5125	24.8304	24.7895	24.2079	23.7155	24.0691	24.3716	25.3969	S	1	64	DKFCANTCVDCRKPISADAKEVHYKNRYWHD	Fhl1	Four and a half LIM domains protein 1	A2AEX8
NaN	NaN	NaN	NaN	NaN	NaN	NaN	NaN	22.8871	NaN	NaN	22.9023	21.2804	22.5756	22.7273	22.1624	22.4651	NaN	22.0944	NaN	NaN	21.5613	22.1834	S	0.999235	483	PSPLKALQTRKIRPPSPIPVSSKLSTKTSLS	Map7d3	MAP7 domain-containing protein 3	A2AEY4
NaN	NaN	NaN	NaN	NaN	NaN	NaN	NaN	NaN	NaN	24.535	25.6543	23.9028	24.8316	25.3743	23.6341	NaN	23.6676	NaN	NaN	23.6272	24.9186	24.5854	S	0.948143	1237	AYGSFQNGHGIKREDSRGSLIPEGATGFPDP	Dock11	Dedicator of cytokinesis protein 11	A2AF47
NaN	NaN	NaN	NaN	NaN	NaN	NaN	NaN	21.802	22.802	25.9237	25.3679	23.9353	24.5922	25.5814	24.1839	24.8694	22.8475	24.0392	23.754	22.0198	24.9447	25.8925	S	0.984657	23	TKRLSKPGTAAELRQSVSEAVRGSVVLEKAK	Dock11	Dedicator of cytokinesis protein 11	A2AF47
25.4685	25.4111	25.1757	25.0966	26.0435	26.2825	26.5553	26.8204	26.4363	23.6662	25.4198	23.7257	24.9903	24.9382	24.6843	25.6565	25.6316	25.4533	26.9623	25.1269	24.6293	25.4166	22.9884	S	0.999979	12	____MAEVRKFTKRLSKPGTAAELRQSVSEA	Dock11	Dedicator of cytokinesis protein 11	A2AF47
NaN	NaN	NaN	NaN	NaN	NaN	NaN	NaN	NaN	26.0822	23.0915	25.2014	25.0679	25.4048	25.3144	24.914	NaN	25.6846	22.9251	25.1294	25.9546	25.9017	25.8975	S	1	797	PPGYLNVNDAESRRQSNADIKWVDGAKPLLK	Dock11	Dedicator of cytokinesis protein 11	A2AF47
23.3228	23.3723	23.9517	23.5917	24.1329	23.4576	24.4763	24.3865	NaN	22.3778	23.2712	25.0025	23.2191	24.0187	25.2962	24.7639	24.2129	24.5625	24.8804	22.825	23.7271	24.6469	25.1788	S	0.999817	333	IAPMFGKKARVVITQSPGKYVPPPPKLNIDM	Tmem185b;Tmem185a;BC023829	Transmembrane protein 185B;Transmembrane protein 185A	Q8R3R5
NaN	NaN	NaN	NaN	NaN	NaN	NaN	NaN	NaN	NaN	NaN	22.3008	NaN	NaN	21.5559	NaN	NaN	NaN	NaN	NaN	NaN	NaN	NaN	S	0.848703	1058	SYRNSLLAGGDDDTMSVISGMSSRGSTVRSK	Stag2	Cohesin subunit SA-2	O35638
NaN	NaN	NaN	NaN	NaN	NaN	NaN	NaN	24.2875	23.1018	NaN	NaN	21.5772	22.864	21.9714	NaN	23.2695	NaN	NaN	NaN	22.722	NaN	23.2867	S	0.994621	569	STKTSVTLERVGPEGSPYLSRRHRGQEIEQY	Pdzd4	PDZ domain-containing protein 4	Q9QY39
NaN	NaN	NaN	NaN	NaN	NaN	NaN	NaN	NaN	24.9232	NaN	NaN	23.2998	NaN	23.0883	23.4034	24.5734	NaN	NaN	23.3981	NaN	23.7373	NaN	S	1	766	IRKNKEANAVLARLNSELQQQLKEVHQERIA;IRRNKETNTVLARLNSELQQQLKDVLEERIS	Reps2;Reps1	RalBP1-associated Eps domain-containing protein 2;RalBP1-associated Eps domain-containing protein 1	O54916
24.4456	24.7745	25.3518	25.1113	NaN	23.6517	24.8149	NaN	27.4009	NaN	26.7851	26.3496	26.1114	26.8055	26.5158	26.5683	25.2157	25.8926	26.6675	23.8972	24.3138	24.774	25.5365	S	1	354	RRLNVWDLSKIGEEQSAEDAEDGPPELLFIH	Rbbp7	Histone-binding protein RBBP7	Q60973
23.995	24.3659	24.0013	24.1547	23.7633	24.621	24.9993	25.0406	28.1317	27.9846	27.5502	27.3308	26.984	26.9178	27.6175	27.2203	26.2875	26.5526	27.5085	25.9656	25.835	23.8815	26.9197	S	1	1395	AMSLGQDIPMDQRAESPEEVACRKEEEERKA	Huwe1	E3 ubiquitin-protein ligase HUWE1	Q7TMY8
NaN	NaN	NaN	NaN	NaN	NaN	NaN	NaN	25.4445	24.8528	23.9861	25.1838	24.5002	24.0829	25.0896	24.7803	25.2522	24.3491	24.5302	24.0245	24.5576	24.5885	24.8664	S	0.999987	3663	EYNLEQQRRAQCETLSPDGLPEEQPQTTKLK	Huwe1	E3 ubiquitin-protein ligase HUWE1	Q7TMY8
24.8707	26.2132	25.9539	25.1232	25.8316	25.3376	25.4099	25.6348	28.3454	29.2197	29.073	28.6325	28.6983	28.955	28.8424	28.1302	28.2482	28.0092	28.2208	27.443	27.7861	27.5303	28.0743	S	1	3922	RESQLAHIKDEPPPLSPAPLTPATPSSLDPF	Huwe1	E3 ubiquitin-protein ligase HUWE1	Q7TMY8
NaN	NaN	NaN	NaN	NaN	NaN	NaN	NaN	26.6392	26.2765	25.9376	24.7927	25.6304	23.6589	25.9547	25.084	24.285	25.3789	26.5449	24.5415	20.6305	23.2834	25.3154	S	1	2362	ELEDLIDELLERDGGSGNSTIIVSRSGEDES	Huwe1	E3 ubiquitin-protein ligase HUWE1	Q7TMY8
NaN	NaN	NaN	NaN	NaN	NaN	NaN	NaN	NaN	NaN	NaN	NaN	NaN	NaN	NaN	22.8909	23.255	NaN	NaN	NaN	NaN	NaN	23.1968	S	0.905076	2365	DLIDELLERDGGSGNSTIIVSRSGEDESQED	Huwe1	E3 ubiquitin-protein ligase HUWE1	Q7TMY8
NaN	NaN	NaN	NaN	NaN	NaN	NaN	NaN	NaN	23.0327	23.414	23.3487	22.9746	23.3945	23.2858	22.903	22.049	21.0843	22.3811	21.1131	23.2925	NaN	NaN	S	1	1298	GEPVIRERLSKEKEGSRGEEEAGQEEGGSRR	Huwe1	E3 ubiquitin-protein ligase HUWE1	Q7TMY8
NaN	NaN	NaN	NaN	NaN	NaN	NaN	NaN	NaN	24.1598	24.1725	24.1126	NaN	NaN	24.3576	24.1607	23.8378	23.8777	23.3185	22.8893	23.1678	21.9392	23.7866	S	0.954541	1903	VANCCIRIALPAPRGSGTASDDEFENLRIKG	Huwe1	E3 ubiquitin-protein ligase HUWE1	Q7TMY8
27.2051	26.8798	27.0059	27.2415	27.4485	27.0999	27.5325	28.0039	29.8498	29.9071	29.7148	30.1503	29.8203	29.4245	30.0359	29.8702	29.6802	29.7637	29.8758	28.8052	29.4683	29.4147	29.6034	S	0.999997	1907	CIRIALPAPRGSGTASDDEFENLRIKGPNAV	Huwe1	E3 ubiquitin-protein ligase HUWE1	Q7TMY8
NaN	NaN	NaN	NaN	NaN	NaN	NaN	NaN	NaN	NaN	22.4589	22.5485	22.0831	20.7823	21.8103	20.348	NaN	NaN	NaN	NaN	20.816	NaN	21.9313	S	0.952596	3116	EARQRQLMHERLFGHSSTSALSAILRSPAFT	Huwe1	E3 ubiquitin-protein ligase HUWE1	Q7TMY8
NaN	NaN	NaN	NaN	NaN	NaN	NaN	NaN	21.8093	22.7573	21.4432	22.1753	22.686	23.0067	21.1986	22.0945	21.0526	21.2999	22.4241	NaN	NaN	NaN	22.0998	S	0.999792	3122	LMHERLFGHSSTSALSAILRSPAFTSRLSGN	Huwe1	E3 ubiquitin-protein ligase HUWE1	Q7TMY8
NaN	NaN	NaN	NaN	NaN	NaN	NaN	NaN	23.1344	22.1183	22.3779	21.0551	NaN	22.9962	NaN	NaN	NaN	NaN	22.9273	NaN	NaN	NaN	NaN	S	0.974946	3127	LFGHSSTSALSAILRSPAFTSRLSGNRGVQY	Huwe1	E3 ubiquitin-protein ligase HUWE1	Q7TMY8
NaN	NaN	NaN	NaN	NaN	NaN	NaN	NaN	23.0205	NaN	NaN	25.1383	21.7283	NaN	24.2404	NaN	NaN	23.2162	25.2648	23.1053	24.4203	NaN	24.4383	S	0.970186	3753	TRRANKKAKQTGRLGSSGLGSASSIQAAVRQ	Huwe1	E3 ubiquitin-protein ligase HUWE1	Q7TMY8
NaN	NaN	NaN	NaN	NaN	NaN	NaN	NaN	25.9076	25.6653	25.8397	26.0447	25.5427	25.5832	25.6138	25.3542	25.5724	25.5061	25.703	25.1249	24.4703	25.443	25.8097	S	0.997528	3758	KKAKQTGRLGSSGLGSASSIQAAVRQLEAEA	Huwe1	E3 ubiquitin-protein ligase HUWE1	Q7TMY8
23.3836	22.9354	23.2686	23.1948	23.394	23.4644	23.4493	23.6189	25.8713	NaN	25.9358	25.9025	25.7163	NaN	25.7607	21.1312	25.5486	23.9589	24.3394	NaN	24.6486	NaN	25.2738	S	0.90193	2595	LLGPSAAADILQLSSSLPLQSRGRARLLVGN	Huwe1	E3 ubiquitin-protein ligase HUWE1	Q7TMY8
NaN	NaN	NaN	NaN	NaN	NaN	NaN	NaN	25.2586	25.2599	25.4811	25.8394	25.3012	24.6805	25.445	25.4283	25.6772	25.2381	25.3465	24.8435	24.9039	24.9082	25.1902	S	0.985533	3818	TSVRREESPMDVDQPSPSAQDTQSIVISDGT	Huwe1	E3 ubiquitin-protein ligase HUWE1	Q7TMY8
23.7016	23.4591	24.5751	25.7219	25.7315	25.9642	NaN	NaN	23.157	26.2179	26.1018	26.1282	26.7017	22.7132	26.3911	26.19	27.305	27.0384	NaN	25.6197	26.9492	26.7101	26.1966	S	1	1084	LLVKLCVGSPVRQRRSHHAASTTTAPTPAAR	Huwe1	E3 ubiquitin-protein ligase HUWE1	Q7TMY8
NaN	NaN	NaN	NaN	NaN	NaN	NaN	NaN	24.5926	NaN	NaN	NaN	23.2448	NaN	NaN	23.9884	NaN	23.913	24.532	NaN	NaN	NaN	NaN	S	0.922687	592	KERLQNEDENIFHMASPTERNHQSPSFSKVK		Uncharacterized protein CXorf23 homolog	A2AG58
NaN	NaN	NaN	NaN	NaN	NaN	NaN	NaN	NaN	NaN	25.6646	22.7182	NaN	NaN	NaN	21.0026	NaN	NaN	NaN	22.6292	NaN	22.4228	NaN	S	0.936304	307	TTRVSYDYRHKHHKLSESEQDFPDGRFHKHL		Uncharacterized protein CXorf23 homolog	A2AG58
23.0966	23.225	23.4448	24.6343	24.7018	24.1984	25.4054	25.1115	25.5502	25.8309	25.2498	25.8792	25.2279	24.6157	24.7901	25.5307	23.7456	25.3082	25.2732	24.6822	25.5377	25.8721	25.6217	S	0.958619	410	DCRKENASFSKQFDTSPKPEEKCYSLIKKKP		Uncharacterized protein CXorf23 homolog	A2AG58
25.4557	25.3857	25.6217	25.9539	25.728	26.3861	26.1079	26.158	27.7708	26.9192	25.8582	27.4601	26.7982	26.68	27.6673	27.2502	27.4165	27.2553	27.1161	26.3408	26.921	27.2736	27.3172	S	0.99988	205	DELRHQRVQEESYPQSPRRGSEDFGTRNPFQ		Uncharacterized protein CXorf23 homolog	A2AG58
NaN	NaN	NaN	NaN	NaN	NaN	NaN	NaN	NaN	22.6825	22.8417	21.6713	22.1616	NaN	20.8679	22.5538	22.4236	22.2585	21.616	20.1413	NaN	21.0246	22.5866	S	0.987131	1457	GLLDRIVNYSRASINSLLSDKRSLNSVVTSE	Atp7a	Copper-transporting ATPase 1	Q64430
NaN	NaN	NaN	26.2282	NaN	26.4388	NaN	NaN	NaN	NaN	NaN	NaN	NaN	NaN	NaN	NaN	NaN	NaN	NaN	NaN	NaN	NaN	NaN	S	0.753525	1438	SEISVHVGIDDTSRNSPRLGLLDRIVNYSRA	Atp7a	Copper-transporting ATPase 1	Q64430
NaN	NaN	NaN	NaN	NaN	NaN	NaN	NaN	26.2136	NaN	24.8592	24.9648	26.1835	NaN	NaN	NaN	22.8839	NaN	NaN	NaN	NaN	25.8195	24.6519	S	0.864248	356	GQYRVSIASEVESTASSPSSSSLQKMPLNIV	Atp7a	Copper-transporting ATPase 1	Q64430
NaN	NaN	NaN	NaN	NaN	NaN	NaN	NaN	25.0546	25.2326	23.6748	25.1549	25.156	24.8612	23.8303	NaN	NaN	NaN	24.8562	23.6729	23.3165	23.8838	24.1913	S	0.830383	357	QYRVSIASEVESTASSPSSSSLQKMPLNIVS	Atp7a	Copper-transporting ATPase 1	Q64430
25.0933	24.6756	24.9251	24.6871	25.1451	25.2295	25.4093	25.4102	27.6214	26.8492	27.5299	27.5387	26.1629	27.1113	27.4558	27.0233	26.9665	26.915	27.196	23.1967	26.8756	27.0198	25.7481	S	0.999718	636	SRGDLAFGAPGPRPPSPFDDPTDDPERKEAE	Med12	Mediator of RNA polymerase II transcription subunit 12	A2AGH6
NaN	NaN	NaN	NaN	NaN	NaN	NaN	NaN	23.0685	NaN	21.5555	20.7329	20.9769	NaN	21.709	23.1342	22.9856	22.1352	23.689	21.6467	NaN	22.5666	23.5557	S	0.997466	699	DFSLFSPTMPCEGKGSPSPEKPDVEKEVKPP	Med12	Mediator of RNA polymerase II transcription subunit 12	A2AGH6
24.0419	23.2536	23.9546	23.4611	23.8708	23.8302	NaN	23.9183	NaN	NaN	NaN	NaN	NaN	NaN	NaN	NaN	NaN	NaN	NaN	NaN	NaN	NaN	NaN	S	0.999687	283	MLLHLDAPVQEEGNISPDQTSRDQEPEKDGQ	Aven	Cell death regulator Aven	Q9D9K3
NaN	NaN	NaN	NaN	NaN	NaN	NaN	NaN	NaN	NaN	23.1216	23.7922	23.4155	NaN	22.868	NaN	NaN	NaN	NaN	NaN	NaN	NaN	22.2959	S	0.805656	1237	GGEGSAHLASSRATLSDSEIETNSATSAIFG	Madd	MAP kinase-activating death domain protein	Q80U28
24.1976	23.3374	24.022	24.1862	NaN	24.0941	24.4476	24.2099	NaN	NaN	22.8894	22.6604	21.0661	NaN	22.471	21.2952	22.6577	NaN	NaN	20.2347	NaN	NaN	22.0747	S	0.994474	819	AQKLLRPNSLKLASDSDAESDSRASSPNSTV	Madd	MAP kinase-activating death domain protein	Q80U28
23.9292	23.9242	25.6856	24.2742	24.1736	24.4827	25.2157	25.2012	24.8058	24.9483	23.5054	23.9817	19.4543	NaN	23.8004	24.1417	24.4742	24.319	NaN	NaN	24.6626	24.1153	19.2635	S	1	812	QHVSGSRAQKLLRPNSLKLASDSDAESDSRA	Madd	MAP kinase-activating death domain protein	Q80U28
26.2862	25.8712	25.8504	27.7033	28.9886	28.9591	28.8897	28.6588	28.1833	20.3924	26.4484	24.8892	26.1173	26.2228	26.9485	26.0739	25.5756	25.7402	26.8386	26.9273	24.7273	25.6209	26.0806	S	0.999991	14	__MAGKQPPPLMKKHSQTDLVSRLKTRKILG	Trp53i11	Tumor protein p53-inducible protein 11	Q4QQM4
23.8373	24.4798	24.2064	24.402	24.7567	24.4068	24.9664	25.0224	25.199	24.2974	24.5171	24.837	24.1421	24.2988	24.6948	24.5523	25.0629	24.7582	24.854	24.307	24.3949	24.8568	24.8748	S	1	1138	HCNQFVTPPRMRRQFSAPNLKAGRETTV___	Kif1b	Kinesin-like protein KIF1B;Kinesin-like protein	Q60575-3
NaN	NaN	NaN	NaN	NaN	NaN	NaN	NaN	NaN	24.012	NaN	23.1557	24.2797	22.9823	23.6046	22.9825	25.1242	24.4455	NaN	22.8873	23.8177	23.3586	25.2756	S	0.999925	1050	ISNQQPPPQLRWRSNSLNNGQPKTTRCQATA	Kif1b	Kinesin-like protein KIF1B;Kinesin-like protein	Q60575-3
NaN	NaN	NaN	NaN	NaN	NaN	NaN	NaN	NaN	NaN	NaN	NaN	NaN	21.8358	NaN	NaN	NaN	21.4915	NaN	20.7197	22.8104	23.9088	22.5818	S	0.956949	162	EKINFRCKPSFRESGSRNVREPTFVRHHWVH	Dgkz	Diacylglycerol kinase zeta;Diacylglycerol kinase	Q80UP3
22.8979	22.8434	23.6048	23.0049	24.2049	23.1379	24.1268	23.6996	NaN	NaN	24.5804	25.4274	24.5308	24.8015	24.8047	24.7717	23.8527	23.6026	25.0146	22.9833	22.5722	25.1552	23.3793	S	1	1015	ITRLRSEMKQMNRRASADEQFFPLGQTMSNS	Phka2	Phosphorylase b kinase regulatory subunit alpha, liver isoform	Q8BWJ3
23.5109	NaN	NaN	NaN	NaN	NaN	NaN	NaN	24.7527	24.3471	24.4938	24.6888	24.4301	24.9969	25.4581	25.0746	24.9664	24.9974	24.4109	23.3099	24.0065	24.6323	24.8737	S	1	729	FPMILPTKVLSGHRKSLNLVDSPQPLLKTTP	Phka2	Phosphorylase b kinase regulatory subunit alpha, liver isoform	Q8BWJ3
NaN	NaN	NaN	NaN	NaN	NaN	NaN	NaN	NaN	23.383	23.3913	23.6946	23.4835	NaN	22.5465	23.1366	23.4358	22.1559	NaN	20.3869	23.0434	22.7883	23.7657	S	0.999999	735	TKVLSGHRKSLNLVDSPQPLLKTTPEYDYQW	Phka2	Phosphorylase b kinase regulatory subunit alpha, liver isoform	Q8BWJ3
NaN	NaN	NaN	NaN	NaN	NaN	NaN	NaN	NaN	NaN	23.3404	23.7363	22.3425	23.1343	22.4486	22.5206	22.4672	NaN	NaN	19.6667	21.5357	NaN	22.0533	S	0.996466	447	QDLMPDLHKNMLNRRSFSDVLPESPKSARKK	Garnl3	GTPase-activating Rap/Ran-GAP domain-like protein 3	Q3V0G7
22.3712	22.6131	21.4827	NaN	22.352	23.1824	22.7949	22.8674	NaN	20.5777	20.7008	21.2049	21.3599	NaN	NaN	NaN	21.1736	NaN	NaN	NaN	20.6189	21.4924	21.7467	S	1	455	KNMLNRRSFSDVLPESPKSARKKEEARQAEF	Garnl3	GTPase-activating Rap/Ran-GAP domain-like protein 3	Q3V0G7
NaN	NaN	NaN	NaN	NaN	NaN	NaN	NaN	24.5046	24.4735	24.4203	25.1678	24.4353	23.3074	NaN	22.5053	24.0552	23.9463	NaN	24.0539	23.7572	23.6762	22.7734	S	0.999972	196	APASPVRLSQPAPPISPVPVAQRAGQRSACC	Tprn	Taperin	A2AI08
NaN	NaN	23.3426	23.0215	23.3123	22.5983	22.9849	23.2809	NaN	22.7347	22.6064	26.4143	25.9558	NaN	26.2316	NaN	NaN	NaN	NaN	22.3178	23.1928	25.5764	NaN	S	1	501	PVRPGLPVTFIDEVDSEEEAFQEAKLPSSAV	Tprn	Taperin	A2AI08
24.9308	24.7699	25.0024	24.5631	24.7614	24.6144	25.3366	22.8822	27.4553	26.5505	26.46	27.2168	26.6615	26.0542	27.4143	26.5315	27.0166	26.9044	26.6986	26.2617	26.6817	26.4163	27.0137	S	1	184	SAATRTPTNRSLAPASPVRLSQPAPPISPVP	Tprn	Taperin	A2AI08
23.4958	23.8612	23.1093	23.6149	24.2536	23.4331	23.5356	23.8238	25.0567	25.2682	24.947	25.4486	24.6441	25.239	25.1043	24.5683	24.7415	23.6896	24.7714	22.7645	23.7073	NaN	24.7568	S	0.999998	457	AISDTDKCVRWQRPASPPPFLPATAEAEPAE	Tprn	Taperin	A2AI08
NaN	NaN	NaN	NaN	NaN	NaN	NaN	NaN	24.757	24.2836	23.834	23.3075	24.1084	23.5965	24.6007	24.1345	24.4994	24.2296	23.816	23.8488	23.3211	23.2046	23.9966	S	1	392	QPALAGPGAAPRAEASPIIQPAPATKSVPQV	Usp8	Ubiquitin carboxyl-terminal hydrolase 8;Ubiquitin carboxyl-terminal hydrolase	Q80U87
NaN	NaN	NaN	NaN	NaN	NaN	NaN	NaN	23.3757	NaN	22.9114	23.4072	NaN	23.4686	23.131	NaN	NaN	NaN	23.2833	NaN	NaN	22.974	23.11	S	0.929131	580	KRCPTSEAQKRPADVSPASVSGELNAGKAQR	Usp8	Ubiquitin carboxyl-terminal hydrolase 8;Ubiquitin carboxyl-terminal hydrolase	Q80U87
25.9138	25.363	25.5244	25.9767	26.245	25.2325	26.0101	26.1617	NaN	NaN	NaN	28.3203	NaN	27.4141	27.2933	26.3806	27.171	26.9705	NaN	25.4914	27.1417	27.1357	26.192	S	0.992904	680	PAERDREPSKLKRSYSSPDITQALQEEEKRR	Usp8	Ubiquitin carboxyl-terminal hydrolase 8;Ubiquitin carboxyl-terminal hydrolase	Q80U87
23.6714	22.7606	23.1081	24.1018	24.8264	24.6978	24.8272	25.1587	NaN	26.1984	26.396	26.1783	25.8944	25.9333	25.6421	26.3178	26.1879	26.5611	NaN	26.4875	26.2312	25.9131	26.3015	S	0.984853	1502	TSLHSVQAESCSRRASTEDSPEVDSKAALLP	Trpm7	Transient receptor potential cation channel subfamily M member 7	Q923J1
NaN	NaN	NaN	NaN	NaN	NaN	NaN	NaN	NaN	NaN	20.0289	22.8075	NaN	NaN	NaN	NaN	NaN	NaN	NaN	NaN	NaN	NaN	NaN	S	0.999995	1511	SCSRRASTEDSPEVDSKAALLPDWLRDRPSN	Trpm7	Transient receptor potential cation channel subfamily M member 7	Q923J1
NaN	NaN	NaN	NaN	22.4875	22.3247	22.7453	21.1868	NaN	NaN	NaN	NaN	NaN	NaN	NaN	NaN	NaN	NaN	NaN	NaN	NaN	NaN	NaN	S	0.98154	1360	PEAGSSCGALFPSAVSPPELRQRRHGVEMLK	Trpm7	Transient receptor potential cation channel subfamily M member 7	Q923J1
24.6217	24.6745	24.8947	25.2325	25.1284	24.843	25.5734	25.685	27.0633	26.6638	25.4626	26.0313	25.7503	26.7335	26.2934	26.6892	27.1265	26.6887	26.9401	26.4751	26.8062	26.9015	26.6299	S	0.988843	1403	NSSPHMSSPPTKFSVSTPSQPSCKSHLESTT	Trpm7	Transient receptor potential cation channel subfamily M member 7	Q923J1
NaN	NaN	NaN	NaN	NaN	NaN	NaN	NaN	26.6148	25.8384	25.306	23.8667	24.7973	25.7256	25.2184	23.7451	23.8637	24.5478	NaN	23.0212	NaN	23.5252	NaN	S	0.787321	1300	RPLWKKPSAVNTLSSSLPQGDRESNNPFLCN	Trpm7	Transient receptor potential cation channel subfamily M member 7	Q923J1
23.3847	23.3995	23.6159	23.4215	24.3928	24.3744	24.5663	24.3421	25.2822	24.209	22.3294	25.6865	NaN	22.127	23.849	NaN	NaN	NaN	25.1801	24.8584	NaN	24.2582	23.6348	S	0.991411	1386	VEMLKIFNKNQKLGSSPNSSPHMSSPPTKFS	Trpm7	Transient receptor potential cation channel subfamily M member 7	Q923J1
21.6375	20.3406	22.0092	21.4173	NaN	21.5844	22.847	NaN	21.181	24.4655	24.0832	23.9285	NaN	NaN	24.6675	24.3123	22.7629	24.2646	23.7569	23.1553	22.9665	21.0848	23.0908	S	0.997858	1567	YYSAVERNNLMRLSQSIPFVPVPPRGEPVTV	Trpm7	Transient receptor potential cation channel subfamily M member 7	Q923J1
23.295	22.4545	22.7745	23.73	24.3755	24.2681	24.8818	25.06	24.1568	22.8038	22.7432	24.3344	23.9232	23.5884	24.5566	23.2031	24.4778	24.6318	24.5138	23.8263	24.2406	24.2124	23.8277	S	0.999987	1255	ALTVDTLKTLTAQKASEASKVHNEITRELSI	Trpm7	Transient receptor potential cation channel subfamily M member 7	Q923J1
NaN	NaN	NaN	NaN	NaN	NaN	NaN	NaN	NaN	NaN	NaN	20.9166	NaN	NaN	NaN	NaN	NaN	NaN	NaN	NaN	23.8745	26.1183	NaN	S	0.919579	1269	ASEASKVHNEITRELSISKHLAQNLIDDVPV	Trpm7	Transient receptor potential cation channel subfamily M member 7	Q923J1
22.7451	23.335	23.2345	23.3061	23.0849	23.4661	23.1333	22.8255	NaN	NaN	NaN	NaN	NaN	NaN	NaN	NaN	NaN	NaN	NaN	NaN	NaN	NaN	NaN	S	0.998112	739	FQPSRPSLNLLDSPESPQDSQVPSVHVEVHL	Phka1	Phosphorylase b kinase regulatory subunit alpha, skeletal muscle isoform	P18826
NaN	NaN	25.2538	24.6724	25.3271	NaN	25.3259	NaN	24.6798	24.5311	27.9315	27.4554	22.5306	NaN	28.1205	21.7401	27.0033	23.3711	23.69	25.0141	22.1464	26.3207	NaN	S	0.939621	136	LTERKALVVPEPEPDSDSNQERKDDRERGDG	Rnf20	E3 ubiquitin-protein ligase BRE1A	Q5DTM8
25.0127	24.6043	NaN	NaN	NaN	25.304	NaN	25.2959	28.3293	28.0768	NaN	27.31	28.1481	27.5202	NaN	27.7903	26.838	27.7058	27.9092	25.7404	26.4927	24.796	26.8995	S	0.984639	138	ERKALVVPEPEPDSDSNQERKDDRERGDGQE	Rnf20	E3 ubiquitin-protein ligase BRE1A	Q5DTM8
NaN	NaN	NaN	NaN	NaN	NaN	NaN	NaN	25.4994	27.1357	26.7924	27.382	26.5525	25.8067	27.3095	26.7029	27.3432	27.0516	25.5432	26.1937	26.6625	27.0366	27.4881	S	1	173	NLKHADGEKEDQFNGSPPRPQPRGPRTPPGP	Kiaa1429;1110037F02Rik	Protein virilizer homolog	A2AIV2
27.333	27.5013	26.7866	NaN	NaN	NaN	NaN	NaN	NaN	28.427	NaN	27.3825	NaN	NaN	NaN	NaN	NaN	NaN	NaN	26.9384	27.0106	27.2512	NaN	S	0.780584	1577	FDLHSELERSFLSEPSSPGRSKTTKGFKLGK	Kiaa1429;1110037F02Rik	Protein virilizer homolog	A2AIV2
NaN	NaN	NaN	NaN	NaN	26.8112	NaN	27.3705	28.4109	NaN	27.224	NaN	28.1789	28.1605	27.6542	NaN	27.8429	NaN	28.4802	26.8405	27.1426	27.5356	27.4766	S	0.983419	1578	DLHSELERSFLSEPSSPGRSKTTKGFKLGKH	Kiaa1429;1110037F02Rik	Protein virilizer homolog	A2AIV2
NaN	NaN	NaN	NaN	NaN	NaN	NaN	NaN	26.0451	24.6347	26.2429	26.0811	24.4163	25.4281	26.1391	24.6271	26.1313	25.3959	25.7559	25.5336	25.6036	25.5223	25.4574	S	0.78696	138	AIYGSVDRVISHDRDSPPPPPPPPPPPQPQP	Kiaa1429;1110037F02Rik	Protein virilizer homolog	A2AIV2
NaN	22.2923	NaN	20.6679	22.867	22.265	23.1006	22.5195	NaN	NaN	NaN	NaN	NaN	NaN	NaN	NaN	NaN	NaN	NaN	NaN	NaN	NaN	NaN	S	0.959823	1301	DPVQSHLVSPGQRAPSPGEVSAPSPLDASDG	Snapc4	snRNA-activating protein complex subunit 4	Q8BP86
24.0075	23.2276	24.9678	23.8699	23.247	23.4803	23.8245	23.5687	NaN	NaN	NaN	NaN	NaN	NaN	NaN	NaN	NaN	NaN	NaN	NaN	NaN	NaN	NaN	S	1	461	EDAQLSDKGVLADRESPEQPFMALNKEHLSL	Card9	Caspase recruitment domain-containing protein 9	A2AIV8
NaN	NaN	NaN	NaN	NaN	NaN	NaN	NaN	24.8292	NaN	22.9515	24.5289	23.9734	NaN	23.6298	24.5752	24.3671	24.1203	24.3508	23.8462	24.1807	23.3607	23.1894	S	0.999696	168	PPWTLSDTDSRISPASPAGSPNADFAAHEES	Sdccag3	Serologically defined colon cancer antigen 3 homolog	A2AIW0-3
25.0611	22.9962	NaN	23.3772	22.8423	22.7706	23.1468	23.4009	NaN	NaN	NaN	NaN	NaN	NaN	NaN	NaN	NaN	NaN	NaN	NaN	NaN	NaN	NaN	S	0.99494	18	GYARRQGAPPLSRTRSLVVPDGDKLEDLEEA	Sdccag3	Serologically defined colon cancer antigen 3 homolog	A2AIW0-3
23.3115	22.9735	23.2043	24.3998	24.6283	24.8174	25.0478	24.92	25.885	24.812	23.8071	25.0054	20.4414	24.3111	24.3172	21.7502	25.1308	NaN	25.2549	24.5542	24.9058	25.4354	25.4365	S	0.999966	236	TDYKLRMQTRLVRAHSNLGPSRPRSPLAGDD	Inpp5e	72 kDa inositol polyphosphate 5-phosphatase	Q9JII1
23.01	23.3344	23.6923	24.3143	22.6144	23.5399	24.1389	24.245	NaN	24.9618	23.1765	24.1576	NaN	NaN	NaN	24.4352	23.9452	24.189	NaN	21.3849	21.7745	21.6802	NaN	S	1	245	RLVRAHSNLGPSRPRSPLAGDDHSIHSARSF	Inpp5e	72 kDa inositol polyphosphate 5-phosphatase	Q9JII1
NaN	NaN	NaN	NaN	NaN	NaN	NaN	NaN	24.5314	24.7777	24.4284	22.4257	23.5838	NaN	23.9392	NaN	23.8989	24.8163	NaN	24.2816	NaN	24.6386	23.4557	S	0.981595	103	LSLDDKGWRRRRFRGSQEDLTVQNGASPCRG	Inpp5e	72 kDa inositol polyphosphate 5-phosphatase	Q9JII1
22.8826	23.0702	24.2489	23.2823	23.006	23.5234	23.6248	23.5664	NaN	26.1181	25.617	26.0932	25.4037	24.6754	25.8163	25.9342	25.7386	25.7487	24.7279	25.083	24.9269	24.9185	26.1901	S	0.999663	2101	SPVWDLGSSSLTRAPSLTSDSEGKKPAQAVK	Sec16a		A2AIX1
NaN	NaN	25.9594	25.7104	NaN	26.6458	NaN	NaN	NaN	25.7029	24.9004	24.9677	23.8439	24.8919	NaN	NaN	NaN	NaN	NaN	NaN	NaN	25.3772	24.6371	S	0.990502	1242	ENHRYSEPERPSSRASHYSDQLAPRQGYPEG	Sec16a		A2AIX1
25.3135	25.7352	24.7802	25.0924	25.3602	25.4238	25.7453	25.4001	25.186	NaN	23.3834	24.7782	24.0789	23.8633	24.5835	24.4452	24.765	24.8844	NaN	NaN	23.3787	24.3181	24.9637	S	0.999452	1245	RYSEPERPSSRASHYSDQLAPRQGYPEGYYN	Sec16a		A2AIX1
NaN	24.2721	24.4817	25.7331	25.035	25.7476	26.1953	26.4041	24.5751	NaN	NaN	21.6934	24.3064	24.0574	24.3343	24.4737	24.0989	24.9157	23.6581	NaN	22.5382	NaN	24.672	S	1	1323	YDSEHDPYRKDHYAYSDRPEKCDDHWRYDPR	Sec16a		A2AIX1
NaN	NaN	NaN	NaN	NaN	NaN	NaN	NaN	25.5647	26.4107	26.228	25.376	25.3087	25.305	23.9393	23.9188	NaN	NaN	25.8978	24.1402	NaN	23.6476	25.4552	S	0.999903	1342	EKCDDHWRYDPRFTGSFDDDAEIHRDPYGEE	Sec16a		A2AIX1
22.5883	NaN	21.5258	NaN	22.3358	NaN	NaN	23.1709	24.675	24.438	23.929	24.8639	24.639	24.2675	23.5471	23.0202	24.267	NaN	23.5759	23.1839	23.3131	22.9538	22.8948	S	0.999998	1995	VPMFPVPMSRGPLELSPAYGPPGSALGFPES	Sec16a		A2AIX1
25.2802	25.1133	25.082	24.9018	25.0164	25.5916	25.9816	25.7656	26.1478	25.1955	25.4156	26.8336	26.0802	25.5592	26.3747	26.1695	26.7634	26.4588	25.6716	26.3785	26.883	26.7849	26.5322	S	1	2053	PQEAKSPDPEMVPRGSPVRHSPPELSQEEFG	Sec16a		A2AIX1
26.9984	26.5127	26.2938	26.3707	26.3111	26.534	26.8413	26.5802	27.0955	27.0632	27.3053	27.034	27.0229	26.8078	27.7132	27.1256	27.2038	27.3556	26.983	26.57	26.6621	26.847	27.0264	S	0.999849	1028	DFTLNRTLENPVRMYSPSPSDGPASQQPLPN	Sec16a		A2AIX1
NaN	NaN	NaN	NaN	NaN	NaN	NaN	NaN	24.6915	NaN	NaN	NaN	NaN	NaN	NaN	NaN	NaN	NaN	NaN	NaN	22.668	NaN	NaN	S	0.766458	1030	TLNRTLENPVRMYSPSPSDGPASQQPLPNHP	Sec16a		A2AIX1
24.2474	23.9426	24.0784	24.129	24.1906	23.8016	24.1484	24.3019	NaN	NaN	NaN	NaN	NaN	NaN	NaN	NaN	NaN	NaN	NaN	NaN	NaN	NaN	NaN	S	0.999586	554	RPDSVSSSYSSHSHRSPPGSARPQELVGTFI	Sec16a		A2AIX1
24.9142	24.7509	25.5356	26.1665	26.1371	25.9188	26.68	26.5096	26.8377	24.8784	24.199	25.0233	24.7493	25.128	25.6163	25.4792	25.8424	25.7045	25.3614	24.5923	25.5804	25.0167	25.3766	S	0.873729	1238	SAYAENHRYSEPERPSSRASHYSDQLAPRQG	Sec16a		A2AIX1
24.137	26.1807	25.824	25.6026	25.3792	25.4931	25.6039	25.8182	26.5416	25.3482	24.2409	26.5094	26.0854	26.3672	26.0895	26.4095	25.7327	26.5403	26.2967	NaN	24.3221	25.1075	25.5482	S	1	102	MKQEVLPVLPAPQKESAEQEGFADILSQKRQ	Man1b1	Endoplasmic reticulum mannosyl-oligosaccharide 1,2-alpha-mannosidase	A2AJ15
NaN	NaN	NaN	NaN	NaN	NaN	NaN	NaN	NaN	NaN	NaN	NaN	23.3378	22.5981	22.5821	21.6627	NaN	NaN	NaN	22.1001	NaN	NaN	21.6631	S	0.966731	1327	TTLEEVFLKVSEEDQSLENSEADVKESRKDV	Abca2	ATP-binding cassette sub-family A member 2	P41234
22.9269	21.779	20.762	23.1464	23.3781	23.4754	23.7959	23.9337	NaN	NaN	NaN	NaN	NaN	NaN	NaN	NaN	NaN	NaN	NaN	NaN	NaN	NaN	NaN	S	0.813699	68	KRKKEKPNSGGTKSDSASDSQEIKIQQSSKH	Nmt2	Glycylpeptide N-tetradecanoyltransferase 2;Glycylpeptide N-tetradecanoyltransferase	O70311
NaN	NaN	NaN	NaN	NaN	NaN	NaN	NaN	25.4484	27.5907	NaN	NaN	25.8759	22.49	26.3915	24.8979	26.0205	25.0591	24.4471	23.8533	25.4861	25.0141	28.083	S	1	38	GIDGDNEEETEHAKGSPGGDLGAKKKKKKQK	Nmt2	Glycylpeptide N-tetradecanoyltransferase 2;Glycylpeptide N-tetradecanoyltransferase	O70311
26.3129	25.7272	25.4713	25.7555	26.4109	26.3013	26.8577	26.9643	NaN	NaN	26.4712	26.4747	26.4776	26.99	25.9946	26.8646	27.2124	26.4395	27.873	25.6404	25.9474	26.1891	NaN	S	1	544	RKSRAAEEKEPAAPASPAPSPVPSPTPAQPQ	Map7d1	MAP7 domain-containing protein 1	A2AJI0
23.0729	23.7086	22.9581	22.8079	NaN	23.4763	23.8579	23.9276	NaN	NaN	NaN	NaN	NaN	NaN	NaN	NaN	NaN	NaN	NaN	NaN	NaN	NaN	NaN	S	1	344	GSGPGRRPTRARAGASLAPGPHPDRTHPSAA	Map7d1	MAP7 domain-containing protein 1	A2AJI0
24.3539	24.409	24.0533	24.1592	24.4623	24.173	24.4568	24.9335	22.1219	NaN	23.8469	24.1534	25.209	NaN	NaN	23.5306	25.4536	24.9436	25.0984	24.8733	25.0004	25.0921	24.9227	S	0.999905	256	HSSPGRKTSGSRCSVSAVNLPKHVDSIINKR	Map7d1	MAP7 domain-containing protein 1	A2AJI0
24.4347	23.8595	23.9943	24.7853	24.8988	24.7555	25.0434	25.1844	NaN	26.1877	24.9979	25.4311	25.1935	24.7428	25.3625	24.2833	25.0594	23.7826	25.0538	23.7198	25.6508	25.1163	24.9262	S	0.998597	519	PKGRVRRKEEAKESPSPSGPEDKNHRKSRAA	Map7d1	MAP7 domain-containing protein 1	A2AJI0
NaN	NaN	NaN	NaN	NaN	NaN	NaN	NaN	NaN	NaN	NaN	22.5513	NaN	NaN	NaN	NaN	NaN	NaN	NaN	NaN	NaN	NaN	NaN	S	0.882625	28	APAAVLARIPQEPRPSPEGDPSPPPPPTPMS	Map7d1	MAP7 domain-containing protein 1	A2AJI0
25.007	24.9289	24.6122	24.8916	24.6317	24.8547	25.2671	25.6825	NaN	NaN	24.6754	25.8014	24.6632	NaN	26.5792	25.4788	26.3448	NaN	NaN	NaN	22.6536	NaN	24.7729	S	0.913633	34	ARIPQEPRPSPEGDPSPPPPPTPMSALVPDT	Map7d1	MAP7 domain-containing protein 1	A2AJI0
24.4715	24.0601	24.4862	25.1507	25.1661	25.4498	25.5874	25.5163	25.5095	26.0772	25.3821	25.6483	25.7903	25.3701	25.9328	24.6392	25.0975	25.5465	25.6464	25.0333	25.7053	25.9574	26.4821	S	1	401	PSGERPERRKPGAGGSPALARRRLEATPVQK	Map7d1	MAP7 domain-containing protein 1	A2AJI0
25.7153	25.6129	25.8843	25.4891	25.4674	25.3054	25.8583	26.097	27.7843	26.9525	26.008	27.5724	26.0693	NaN	NaN	NaN	NaN	NaN	NaN	NaN	25.8561	NaN	27.2073	S	0.995519	454	LKKRQSLPASIRPRLSTGSELSPKSKARPSS	Map7d1	MAP7 domain-containing protein 1	A2AJI0
27.1578	27.0301	26.9697	27.0303	26.8848	27.4723	27.6999	27.7462	28.8118	28.1933	28.2125	28.3983	NaN	27.7626	27.4976	28.0295	27.448	28.2124	28.3458	27.4924	28.1872	28.6125	27.6867	S	0.999995	460	LPASIRPRLSTGSELSPKSKARPSSPSTTWH	Map7d1	MAP7 domain-containing protein 1	A2AJI0
25.5943	25.0518	25.5231	25.0283	25.3672	25.2989	25.5571	25.6592	NaN	26.9454	27.1573	27.0327	26.1392	26.9487	26.2194	26.1108	26.2603	25.8848	NaN	NaN	23.7298	24.0092	25.986	S	0.999646	78	PKQLPLEPGNPTGQISPQPAPPQEECPSSEA	Map7d1	MAP7 domain-containing protein 1	A2AJI0
NaN	NaN	NaN	23.4475	23.545	NaN	24.1212	NaN	24.5982	26.0383	25.7933	25.5278	24.7779	26.0041	26.1222	26.2394	25.3093	26.3333	25.5538	24.5269	24.4176	NaN	25.9238	S	0.999975	444	EKSALARERNLKKRQSLPASIRPRLSTGSEL	Map7d1	MAP7 domain-containing protein 1	A2AJI0
26.6814	26.481	26.4493	26.4422	26.539	27.221	27.6307	27.3517	27.8078	27.6662	26.5045	26.9223	27.2121	27.1921	28.2768	27.5584	27.0089	27.839	27.5939	27.1644	27.6552	27.5842	27.7174	S	0.998678	115	PTATGPREAKPSRRSSQPSPTTVPASDSPPA	Map7d1	MAP7 domain-containing protein 1	A2AJI0
NaN	NaN	NaN	NaN	NaN	NaN	NaN	NaN	23.8494	24.9546	24.956	25.0738	NaN	24.1266	24.128	23.654	24.0785	23.8171	24.7455	24.6605	25.058	24.0803	24.2801	S	0.993519	118	TGPREAKPSRRSSQPSPTTVPASDSPPAKQD	Map7d1	MAP7 domain-containing protein 1	A2AJI0
NaN	NaN	NaN	NaN	NaN	NaN	NaN	NaN	24.376	24.6224	24.1831	24.848	23.0403	NaN	24.2732	24.0976	24.2805	NaN	24.2452	23.02	22.9017	23.458	23.1104	S	0.984244	127	RRSSQPSPTTVPASDSPPAKQDVKKAGERHK	Map7d1	MAP7 domain-containing protein 1	A2AJI0
24.0025	24.3844	24.9206	24.9535	24.8956	25.2012	25.2636	25.7256	25.2056	24.6171	24.8249	25.4516	21.5077	24.3442	25.4038	24.9678	24.6568	25.1059	NaN	24.5079	24.8566	24.7238	24.8651	S	0.998399	368	RTHPSAAVPVCPRSASASPLTPCSAPRSAHR	Map7d1	MAP7 domain-containing protein 1	A2AJI0
NaN	NaN	NaN	NaN	NaN	NaN	NaN	NaN	NaN	NaN	NaN	20.7637	NaN	NaN	NaN	20.6913	22.4854	NaN	NaN	21.4451	22.5016	23.2408	22.0763	S	0.999395	315	DRLMTPTLSFLARSRSAVTLPRNGRDQGRGS	Map7d1	MAP7 domain-containing protein 1	A2AJI0
24.634	24.3068	25.6959	24.7033	25.1163	25.0158	25.3824	25.2675	25.3684	26.6263	26.4719	26.4293	26.3525	25.5414	26.3594	25.9939	26.1262	26.2352	25.3966	25.5616	25.9058	25.8049	26.6881	S	1	211	QNRRERPPSFRDRQRSPIALPVKQEPPQIDA	Pnisr	Arginine/serine-rich protein PNISR	A2AJT4
NaN	NaN	NaN	NaN	NaN	NaN	NaN	NaN	25.0103	NaN	23.6667	NaN	NaN	NaN	24.1505	24.9054	23.8463	24.6924	25.037	NaN	22.9915	23.868	NaN	S	1	204	PGPPAPTQNRRERPPSFRDRQRSPIALPVKQ	Pnisr	Arginine/serine-rich protein PNISR	A2AJT4
NaN	23.6182	24.1409	24.0972	25.1823	24.0199	24.4306	24.7447	NaN	NaN	NaN	NaN	NaN	NaN	NaN	NaN	NaN	NaN	NaN	NaN	NaN	NaN	NaN	S	0.917568	601	RTRGKLRDRRRSNRSSIERERRRNRSPSRDR	Pnisr	Arginine/serine-rich protein PNISR	A2AJT4
NaN	NaN	NaN	NaN	NaN	NaN	NaN	NaN	25.5287	24.2921	23.3508	23.3511	24.498	24.1041	24.7104	24.4455	25.2975	24.9422	NaN	23.9246	24.8356	24.6215	25.1477	S	0.999939	726	LKRKRESERTFCRSGSISVKVIRHDSRQDSK	Pnisr	Arginine/serine-rich protein PNISR	A2AJT4
NaN	NaN	NaN	NaN	NaN	NaN	NaN	NaN	24.9	24.7709	NaN	NaN	NaN	NaN	NaN	23.223	23.1878	23.5026	24.0667	23.3142	NaN	23.3102	23.8898	S	0.966231	58	RLRPIIQRRSRSLPTSPERRAKAAGAPGAAC	Ppp1r3d	Protein phosphatase 1 regulatory subunit	A2AJW4
27.288	26.8723	26.9779	27.0637	26.9068	27.267	27.7137	27.9083	23.046	NaN	28.2402	NaN	27.3064	NaN	27.6087	27.4335	28.6264	28.4295	28.5276	26.9564	27.2232	22.023	28.7958	S	1	262	TTTPTTSAITASRSESPPPLSEPKQAKVVAR	Brd3	Bromodomain-containing protein 3	Q8K2F0
NaN	NaN	NaN	NaN	NaN	NaN	NaN	NaN	25.5165	25.1561	23.8887	25.331	23.3815	24.3408	25.2862	24.9665	24.781	24.4623	24.8193	24.2176	24.2555	23.2613	23.8302	S	1	50	PAPRPASPQRGADAASPPPVAGSPRLPGGPA	Dcaf10	DDB1- and CUL4-associated factor 10	A2AKB9
NaN	NaN	NaN	NaN	NaN	NaN	NaN	NaN	25.4115	25.4484	25.3759	24.3067	24.6716	24.5334	25.2565	NaN	NaN	NaN	25.2577	23.9822	23.3816	20.2723	NaN	S	1	57	PQRGADAASPPPVAGSPRLPGGPAVSPAERA	Dcaf10	DDB1- and CUL4-associated factor 10	A2AKB9
NaN	NaN	NaN	NaN	NaN	NaN	NaN	NaN	27.1097	26.6915	26.8085	26.939	24.9759	26.1313	26.5225	25.1896	25.781	26.1096	26.4854	26.0652	26.3066	24.6841	24.8538	S	1	67	PPVAGSPRLPGGPAVSPAERAGEFAAPGALE	Dcaf10	DDB1- and CUL4-associated factor 10	A2AKB9
NaN	NaN	NaN	NaN	NaN	NaN	NaN	NaN	23.9026	24.2464	24.4869	23.7251	23.8117	24.3461	23.6956	24.1116	22.3635	23.4815	23.3309	21.6596	20.7469	NaN	23.6875	S	1	95	RRVTVRKADAGGLGISIKGGRENKMPILISK	Snta1	Alpha-1-syntrophin	Q61234
NaN	23.4538	22.3226	23.2704	23.2472	22.2013	22.5958	23.0614	25.6778	NaN	24.8222	23.9184	21.9561	24.5007	24.0406	23.965	24.1057	22.6631	24.4588	23.7475	23.6466	23.8988	24.1237	S	0.996855	183	PYFKNSAGGTSVGWDSPPASPLQRQPSSPGP	Snta1	Alpha-1-syntrophin	Q61234
NaN	NaN	NaN	NaN	NaN	27.2343	27.6138	27.8107	NaN	NaN	26.023	22.575	22.8145	NaN	23.953	24.8432	25.1718	25.0588	21.5734	NaN	NaN	21.8122	24.9439	S	1	194	VGWDSPPASPLQRQPSSPGPQPRNLSEAKHV	Snta1	Alpha-1-syntrophin	Q61234
26.8593	25.8961	26.6517	27.1143	26.9658	27.2343	27.6138	27.8107	28.5578	27.8587	26.1714	27.878	27.4845	27.405	28.0633	27.3565	NaN	19.7651	27.9408	27.6421	27.9541	28.02	28.5738	S	1	195	GWDSPPASPLQRQPSSPGPQPRNLSEAKHVS	Snta1	Alpha-1-syntrophin	Q61234
22.6845	22.4922	22.7261	23.2799	23.3754	23.7758	24.4533	23.6899	27.3379	28.011	26.3608	NaN	26.1749	26.0792	NaN	26.493	26.5933	27.3436	NaN	25.578	NaN	26.6047	26.9743	S	0.992829	1042	QEREQLQPHENGEGNSET_____________	Itgav	Integrin alpha-V;Integrin alpha-V heavy chain;Integrin alpha-V light chain	P43406
25.85	25.8125	25.3676	25.9614	25.9954	25.4637	26.5249	26.0077	25.3308	NaN	24.508	24.8342	24.5809	24.3702	25.2002	24.5777	24.853	24.0625	24.4967	NaN	24.1383	24.0784	23.09	S	1	6	__________MSLYPSLEDLKVDKVIQAQTA	Sdcbp	Syntenin-1	O08992
NaN	NaN	NaN	NaN	NaN	NaN	NaN	NaN	24.5194	24.4101	24.379	23.1032	23.833	23.688	23.7586	NaN	23.1594	NaN	23.6955	NaN	23.2534	22.9623	23.3519	S	0.999973	52	QEAPSTNECKARRAASAAGASPAATPAAPES	Agps	Alkyldihydroxyacetonephosphate synthase, peroxisomal	Q8C0I1
23.9922	24.0465	24.4801	24.535	24.096	NaN	24.4546	25.0141	26.5763	NaN	24.9759	26.6456	26.0737	25.751	26.5267	26.1722	26.4305	25.8852	26.4437	24.0639	26.2702	25.9487	26.0259	S	1	57	TNECKARRAASAAGASPAATPAAPESGTIPK	Agps	Alkyldihydroxyacetonephosphate synthase, peroxisomal	Q8C0I1
23.1268	22.2089	NaN	23.1742	22.649	22.649	22.9678	22.2551	24.314	24.2521	23.7465	23.9706	23.8799	23.2515	24.2175	23.2609	23.5941	22.9675	23.6396	20.3508	21.8989	22.9847	23.3379	S	0.999999	576	GACIYFYFAFNYRGISDPLTVFEHTEAAARE	Agps	Alkyldihydroxyacetonephosphate synthase, peroxisomal	Q8C0I1
25.0924	25.2398	25.352	24.9792	24.3915	24.7803	25.4634	25.6674	25.924	24.9688	25.1671	25.9258	24.2909	24.7528	25.7825	24.0964	25.5887	25.4286	25.4461	24.5824	25.2215	24.9769	25.7618	S	0.998872	97	NPMVSKQEKGLSSLGSPKDSQGTARESVFAL	Surf6	Surfeit locus protein 6	P70279
NaN	22.2773	21.3965	NaN	22.2848	21.9574	21.6375	22.5095	NaN	NaN	NaN	NaN	NaN	NaN	20.7713	NaN	21.436	22.1587	NaN	NaN	NaN	NaN	21.9521	S	1	213	LLIPGKSASRFGRRGSALGIGAVEESLIVPG	Rap1gap		A2ALS7
24.5681	24.0338	23.8272	24.0773	23.9374	23.884	24.3133	24.5374	26.7734	23.539	26.1922	26.825	26.3736	26.2731	26.7048	25.6115	26.5451	25.5738	26.2079	25.8109	26.3193	26.5309	26.5567	S	0.9965	236	CSSTPDHTLPKADASSTENILYKVGLWEASR	Shroom2	Protein Shroom2	A2ALU4
23.54	23.7878	24.2058	23.8693	24.277	24.4121	24.4329	24.368	25.6237	25.5721	25.7925	25.2062	25.5362	25.258	25.8623	25.4243	25.5516	25.571	25.4203	25.2331	24.9004	25.339	25.9185	S	1	318	NFGPVWYVPDKKKAPSPPPLGLPLRSDSFSV	Shroom2	Protein Shroom2	A2ALU4
NaN	NaN	NaN	NaN	NaN	NaN	NaN	NaN	25.8093	NaN	25.9187	25.7471	25.5783	NaN	26.1404	25.4476	25.136	24.5818	25.7256	25.2802	25.1395	23.0413	25.7388	S	0.949702	1153	VEAPHRARPPEPRPPSTPAPPVRDSCSSPPS	Shroom2	Protein Shroom2	A2ALU4
NaN	NaN	NaN	NaN	NaN	NaN	NaN	NaN	NaN	24.122	NaN	NaN	24.3444	24.0324	25.5886	23.5839	24.4932	22.376	NaN	22.0688	NaN	NaN	24.3946	S	0.997883	602	PSNDFKLVDGESGRISRQRTPMLHSLTQDGT	Shroom2	Protein Shroom2	A2ALU4
NaN	NaN	NaN	NaN	NaN	NaN	NaN	NaN	NaN	NaN	NaN	NaN	NaN	22.988	24.1483	23.6042	21.7664	22.9632	NaN	NaN	22.0427	NaN	22.1184	S	0.847576	198	HSSQLYPSGHLSSAKSNSSIDHLGGHSKRDS	Shroom2	Protein Shroom2	A2ALU4
NaN	NaN	NaN	NaN	NaN	NaN	NaN	NaN	NaN	23.8328	22.1332	21.8658	21.4039	23.2971	24.689	NaN	NaN	NaN	NaN	21.1703	23.4217	23.3922	23.9425	S	0.973307	200	SQLYPSGHLSSAKSNSSIDHLGGHSKRDSAY	Shroom2	Protein Shroom2	A2ALU4
NaN	NaN	NaN	NaN	NaN	NaN	NaN	NaN	23.9548	25.6796	NaN	NaN	NaN	NaN	NaN	NaN	22.93	23.8937	NaN	NaN	NaN	NaN	24.3515	S	1	285	RPSCFIPRVPGNSSKSPRPEDNVEPKIATHG	Shroom2	Protein Shroom2	A2ALU4
NaN	22.9966	NaN	NaN	23.7741	24.1157	23.7139	24.0786	NaN	NaN	NaN	NaN	NaN	NaN	NaN	NaN	NaN	NaN	NaN	NaN	NaN	NaN	NaN	S	1	484	PPLLKTNNNQILEVKSPIKQSKSDKQIKNGE	Mllt3	Protein AF-9	A2AM29
NaN	NaN	NaN	NaN	NaN	NaN	NaN	NaN	NaN	NaN	23.7867	22.0842	NaN	NaN	NaN	22.389	22.9204	23.556	NaN	NaN	22.3793	22.4822	NaN	S	0.997992	325	DEFSETEKEVTKGGYSPQEGGDPPTPEPLKV	Murc	Muscle-related coiled-coil protein	A2AMM0
NaN	NaN	23.1306	22.5726	22.5796	22.7527	NaN	NaN	NaN	NaN	NaN	23.8763	NaN	NaN	NaN	NaN	NaN	NaN	NaN	NaN	NaN	NaN	NaN	S	0.840728	20	GSASNAGKIHQNRLSSVTEDEDQDAALTIVT	Murc	Muscle-related coiled-coil protein	A2AMM0
NaN	NaN	NaN	NaN	NaN	NaN	NaN	NaN	25.1505	25.3954	24.8964	25.1576	24.6066	23.129	24.9855	25.1732	25.2821	25.3364	24.6543	24.6469	25.1796	23.9942	25.0083	S	0.99999	55	DFYPNKNHGPDSGIGSDNGEKRLSTTEPSDD	Lrch2	Leucine-rich repeat and calponin homology domain-containing protein 2	A2AMP0
23.9607	24.3856	24.5397	24.2906	24.0662	24.1471	24.6063	25.1281	25.2565	27.2182	27.3514	27.1831	26.7213	26.6324	27.2264	25.6641	27.0215	25.3162	26.7997	26.0223	26.488	25.706	26.3308	S	0.942214	63	GPDSGIGSDNGEKRLSTTEPSDDDTISLHSQ	Lrch2	Leucine-rich repeat and calponin homology domain-containing protein 2	A2AMP0
NaN	NaN	NaN	NaN	NaN	NaN	NaN	NaN	25.0611	25.4122	25.125	25.7123	25.0731	24.0939	25.6018	25.1325	25.7725	25.3757	24.9549	23.483	25.2659	25.4765	25.5174	S	0.991809	633	DQSSVHTRIAYQSSASPPDSAPGSVANGHGG	Ubap2	Ubiquitin-associated protein 2	A2AMY5
23.7329	23.7537	NaN	NaN	24.7653	NaN	NaN	23.6752	25.87	NaN	NaN	NaN	NaN	NaN	24.7817	NaN	24.1273	NaN	25.466	22.9203	NaN	NaN	NaN	S	0.988855	400	SPFPAASSAQQNDTASPPATTAAWDLKPSAP	Ubap2	Ubiquitin-associated protein 2	A2AMY5
NaN	NaN	NaN	NaN	NaN	NaN	NaN	NaN	NaN	NaN	NaN	NaN	NaN	NaN	NaN	NaN	NaN	NaN	NaN	NaN	NaN	24.9354	19.9865	S	0.75536	113	WETVGGKKKNFGRESSENKENREKRTEREAS	Ubap2	Ubiquitin-associated protein 2	A2AMY5
NaN	NaN	NaN	NaN	NaN	NaN	NaN	NaN	NaN	23.5058	21.9296	24.7966	NaN	23.388	24.5738	24.0801	24.9383	24.2113	24.565	24.0263	24.9839	25.0324	24.7222	S	0.999145	5	___________MTSVSNDRCRGAREKPQMPT	Ubap2	Ubiquitin-associated protein 2	A2AMY5
23.2587	22.6151	23.1943	22.6488	23.1619	23.1726	24.0329	23.6393	26.0918	25.8732	25.331	25.8713	24.8389	24.7959	25.3221	25.0539	25.2346	24.5653	25.4636	24.6601	25.3899	24.5367	25.2407	S	0.797123	619	EKAAPPPPPPPPPLESSPRVKSPNKQASGEK	Ubr4	E3 ubiquitin-protein ligase UBR4	A2AN08
25.6493	26.0157	26.4204	26.2248	25.7868	25.7059	25.9606	25.9417	NaN	27.4627	27.3843	27.7771	27.3359	27.216	27.7327	27.4619	27.7355	27.2038	27.4086	27.0611	27.1713	27.6464	27.4681	S	1	178	TVKTLSDVEDQKELASPVSPELRQKEVQMNF	Ubr4	E3 ubiquitin-protein ligase UBR4	A2AN08
25.6114	25.647	25.7512	25.5128	25.3631	25.4002	25.4166	25.4852	26.824	26.0343	24.7103	26.9313	26.6028	26.3599	26.8459	26.64	26.7153	26.3973	26.4625	25.898	21.1779	26.994	26.5639	S	0.999985	181	TLSDVEDQKELASPVSPELRQKEVQMNFLNQ	Ubr4	E3 ubiquitin-protein ligase UBR4	A2AN08
28.8711	28.9819	28.7362	NaN	28.7186	29.1179	29.6002	29.5879	30.8686	31.046	29.7217	29.4238	29.5886	NaN	22.4242	22.44	29.3354	21.9969	30.4773	NaN	28.6565	29.8376	29.3078	S	0.946448	2715	RVLRPRNKRRHVTLPSSPRSNTPMGDKDDDD	Ubr4	E3 ubiquitin-protein ligase UBR4	A2AN08
28.8711	28.9819	28.7362	NaN	28.7186	29.1179	29.6002	29.5879	30.8686	31.046	30.5286	29.4442	29.5994	NaN	30.6675	23.829	29.3354	21.9969	30.4773	30.2622	28.618	30.4691	30.3667	S	0.992325	2716	VLRPRNKRRHVTLPSSPRSNTPMGDKDDDDD	Ubr4	E3 ubiquitin-protein ligase UBR4	A2AN08
22.2045	22.8159	21.1202	22.8602	23.3972	23.4237	23.7482	23.8217	25.1362	22.2675	24.1704	24.7686	24.7932	NaN	25.0959	24.8633	25.8414	24.1566	26.0499	NaN	24.3262	24.8105	NaN	S	0.999978	785	LAHFENLQKYKAKNPSPPPTRPVSRKCAINA	Ciz1		Q8VEH2
NaN	NaN	NaN	NaN	NaN	NaN	NaN	NaN	25.9709	25.5031	25.2726	26.5292	26.0015	25.8098	25.7665	25.4552	25.4737	25.4891	26.3586	25.4084	25.719	25.9169	26.0428	S	1	830	SPQDTVKMPSKVKPGSPGLPPPLRRSTRLKT	Ciz1		Q8VEH2
NaN	NaN	NaN	NaN	NaN	NaN	NaN	NaN	NaN	23.7211	NaN	NaN	NaN	NaN	NaN	NaN	NaN	NaN	NaN	NaN	NaN	NaN	NaN	S	0.985735	87	DQSPDEKPLVALDTDSDDDFDMSRYSSSGYS	Fam219a	Protein FAM219A	Q9D772
26.0957	25.5078	26.0356	26.9078	26.5955	27.0201	27.4482	27.4015	27.5848	24.3951	26.5633	26.856	26.2559	26.0757	26.9522	26.1367	26.6943	26.4467	26.7436	25.9325	27.0505	26.7298	26.3995	S	1	4827	GNLNKNKKHQDEKEDSEPEDVEQGQEKINEQ	Mdn1		A2ANY6
NaN	NaN	NaN	NaN	NaN	NaN	NaN	NaN	NaN	24.8701	24.2232	25.216	25.4476	NaN	NaN	NaN	22.2527	NaN	25.2726	24.7873	24.7409	23.1726	NaN	S	0.998988	1150	PPYSDPRQAREPGQASPTPDEETDDKPLKEV	Zc3h6	Zinc finger CCCH domain-containing protein 6	Q8BYK8
23.3655	23.4913	23.3229	23.4514	24.2087	23.7654	23.5801	24.3376	25.7372	23.7839	25.0106	25.6906	24.1578	24.4347	25.2282	24.8233	25.0845	24.2107	24.6735	24.2052	24.5442	25.156	25.2893	S	0.999995	389	SSVESLPPTSEGKRMSADMSEIEARIVATAG	Map3k7	Mitogen-activated protein kinase kinase kinase 7	Q62073
27.5496	27.0909	27.4179	26.8317	27.1278	27.3223	27.4841	26.9953	28.3164	28.4885	27.6405	28.5653	27.842	28.6371	29.0258	28.111	28.7135	28.0143	27.3772	27.6024	27.7608	28.395	28.4534	S	1	412	ARIVATAGNGQPRRRSIQDLTVTGTEPGQVS	Map3k7	Mitogen-activated protein kinase kinase kinase 7	Q62073
NaN	NaN	NaN	NaN	NaN	NaN	NaN	NaN	NaN	NaN	NaN	NaN	NaN	NaN	NaN	NaN	NaN	NaN	NaN	NaN	22.0371	NaN	NaN	S	0.841219	427	SIQDLTVTGTEPGQVSSRSSSPSVRMITTSG	Map3k7	Mitogen-activated protein kinase kinase kinase 7	Q62073
NaN	NaN	NaN	NaN	NaN	NaN	NaN	NaN	NaN	NaN	NaN	NaN	NaN	NaN	NaN	22.761	23.6061	22.472	NaN	NaN	NaN	NaN	NaN	S	1	60	FLRQRGIGEPFQGKNSLRKAKLQQGFVTPLK	Tpx2	Targeting protein for Xklp2	A2APB8
NaN	NaN	21.217	NaN	21.337	21.1892	21.5571	22.4555	NaN	NaN	NaN	NaN	NaN	NaN	NaN	NaN	NaN	NaN	NaN	NaN	NaN	22.1668	NaN	S	1	414	QYKFKARELDPRIFESGPILPKRAPVKPPTQ	Tpx2	Targeting protein for Xklp2	A2APB8
26.7247	26.5608	26.3921	27.2819	27.9052	27.5821	27.9832	28.0013	26.1725	22.384	26.4937	26.2543	26.0568	27.9158	26.2389	26.2456	25.9526	26.414	27.5895	26.9856	27.2242	27.1144	23.3984	S	1	486	VGVPEKKVIPATVPKSPVFALKNRIRVPIKD	Tpx2	Targeting protein for Xklp2	A2APB8
NaN	NaN	NaN	NaN	NaN	NaN	NaN	NaN	23.4201	22.7059	22.8352	22.2515	22.0543	22.3741	23.0623	23.2677	22.9574	21.895	23.0432	NaN	21.4381	22.2355	22.9529	S	0.996826	645	TVIFQEPFVPKKEKKSLAENPSGSLVQEPFQ	Tpx2	Targeting protein for Xklp2	A2APB8
26.7671	26.6551	26.9936	26.7436	27.4034	26.9238	27.5091	27.8928	28.2461	28.0361	28.1887	28.2343	27.6251	27.8255	28.0042	28.0185	27.8679	27.4197	27.9947	26.4104	27.5159	27.5451	28.0194	S	0.999895	737	AVEVKSSELPLTVPVSPKFSTRFQ_______	Tpx2	Targeting protein for Xklp2	A2APB8
NaN	NaN	NaN	NaN	NaN	NaN	NaN	NaN	25.4219	NaN	25.727	25.8009	25.3017	27.8403	26.7603	26.7724	25.0958	25.4905	28.3977	23.8329	25.0842	26.2429	25.5111	S	0.999999	21	SRLQAKQHAQPNQPDSPQETQIIQAKKRKTA	Ccne2	G1/S-specific cyclin-E2	Q9Z238
NaN	NaN	NaN	NaN	NaN	NaN	NaN	NaN	25.9374	25.8926	25.9126	24.0408	25.0757	25.0716	25.8697	26.1325	25.6773	26.1346	26.0416	24.0993	23.9803	24.3317	25.7847	S	1	733	LVINGGNGTVEDRKPSELNGEASKSQEMVHL	Cd44	CD44 antigen	P15379
NaN	NaN	NaN	NaN	NaN	NaN	NaN	NaN	NaN	27.4017	24.5851	25.2883	24.4629	22.1607	24.655	22.3441	23.271	23.8966	NaN	22.7558	NaN	23.3331	27.708	S	1	742	VEDRKPSELNGEASKSQEMVHLVNKEPSETP	Cd44	CD44 antigen	P15379
23.896	23.5827	23.7619	24.5579	23.1523	23.8854	24.734	24.3738	24.2099	22.6841	23.4522	23.3392	23.0126	22.8807	23.0041	22.9006	23.1335	23.3182	NaN	22.7211	23.5746	23.7584	22.6582	S	1	771	TPDQCMTADETRNLQSVDMKIGV________	Cd44	CD44 antigen	P15379
NaN	NaN	NaN	NaN	NaN	NaN	NaN	NaN	25.1156	24.9103	23.7419	25.4851	25.2379	NaN	25.2602	23.9166	25.2403	24.3199	24.3764	NaN	23.9234	23.8639	25.009	S	0.875935	1905	AAPTTSSSSSPPSPASPTSLNQGARGIRTIH	Skt;Etl4	Sickle tail protein	A2AQ25
NaN	NaN	NaN	NaN	NaN	NaN	NaN	NaN	23.9309	24.707	26.1644	26.9148	26	26.8928	27.2615	26.7967	27.0827	27.4079	27.5359	27.0466	26.9618	27.0865	25.8845	S	0.948543	1796	ANGSAKKAGGDCKPTSPSLPASKIPALSPSS	Skt;Etl4	Sickle tail protein	A2AQ25
NaN	NaN	NaN	NaN	NaN	NaN	NaN	NaN	NaN	NaN	NaN	NaN	22.1761	25.2322	NaN	NaN	NaN	NaN	24.7468	NaN	NaN	24.5655	NaN	S	0.912735	505	LNTHGPPHTLQPDRASPSRQSFKKEPGTLVY	Skt;Etl4	Sickle tail protein	A2AQ25
NaN	NaN	NaN	NaN	NaN	NaN	NaN	NaN	24.2831	22.3932	23.0414	22.1947	22.979	23.6315	23.6817	23.6688	23.3992	23.4427	23.8314	21.1821	23.6276	NaN	23.5344	S	0.865522	507	THGPPHTLQPDRASPSRQSFKKEPGTLVYIE	Skt;Etl4	Sickle tail protein	A2AQ25
NaN	NaN	NaN	NaN	NaN	NaN	NaN	NaN	22.2901	NaN	NaN	20.7175	21.5321	22.0673	22.4875	20.6995	20.2265	21.448	21.2098	21.4885	NaN	20.4022	NaN	S	0.80226	352	PMAIPGNATIPRDRLSSLPVSRSISPSPSAI	Skt;Etl4	Sickle tail protein	A2AQ25
NaN	NaN	NaN	NaN	NaN	NaN	NaN	NaN	25.18	24.5514	23.4619	25.0071	23.7427	24.486	24.5213	24.6964	24.0544	24.8802	24.4221	24.8144	24.7911	24.8663	24.921	S	0.999864	353	MAIPGNATIPRDRLSSLPVSRSISPSPSAIL	Skt;Etl4	Sickle tail protein	A2AQ25
NaN	NaN	NaN	NaN	NaN	NaN	NaN	NaN	NaN	NaN	21.3545	21.9282	21.6907	22.0765	NaN	NaN	22.3814	21.6299	NaN	20.6848	NaN	21.6087	NaN	S	0.9965	357	GNATIPRDRLSSLPVSRSISPSPSAILERRD	Skt;Etl4	Sickle tail protein	A2AQ25
NaN	NaN	NaN	NaN	NaN	NaN	NaN	NaN	NaN	NaN	23.6083	23.7008	NaN	24.1817	NaN	NaN	NaN	23.6688	24.1075	23.619	24.9656	24.7102	NaN	S	1	1868	ASLIPSVSNGSLKFQSPPHAGKGHHHLSFAL	Skt;Etl4	Sickle tail protein	A2AQ25
NaN	NaN	NaN	NaN	NaN	NaN	NaN	NaN	NaN	23.5482	NaN	22.7419	NaN	23.99	24.254	23.8712	23.3267	23.3586	23.7162	NaN	NaN	NaN	23.284	S	0.970497	1035	SKGDAAGDKLELSEDSPNSEQELDKIGGKSP	Skt;Etl4	Sickle tail protein	A2AQ25
NaN	NaN	NaN	NaN	NaN	NaN	NaN	NaN	26.6407	25.7602	25.6186	26.0924	26.1629	26.3969	26.2761	25.535	25.4594	26.3521	25.7922	26.5196	25.4646	24.2082	25.8481	S	0.999602	313	PRPGSVAHPPHVIPNSPPSTPVPHSLPPSPS	Skt;Etl4	Sickle tail protein	A2AQ25
NaN	NaN	NaN	NaN	NaN	NaN	NaN	NaN	25.8934	25.7989	25.25	25.5721	25.1687	24.7495	25.6653	24.7144	24.9773	25.0052	25.5718	25.0359	23.9832	25.048	24.4605	S	1	1049	DSPNSEQELDKIGGKSPPPPPPPPRRSYLPG	Skt;Etl4	Sickle tail protein	A2AQ25
NaN	NaN	NaN	NaN	NaN	NaN	NaN	NaN	27.2175	26.6157	26.3973	26.8684	26.8325	26.5393	26.9393	26.394	26.9281	21.6802	26.5906	26.8761	26.6483	26.7485	26.8868	S	0.991741	1808	KPTSPSLPASKIPALSPSSGKSSSLPSASGD	Skt;Etl4	Sickle tail protein	A2AQ25
NaN	NaN	NaN	NaN	NaN	NaN	NaN	NaN	25.0965	24.6162	24.1652	25.0829	24.5242	25.0161	25.5212	25.3526	25.0491	25.7802	24.3189	25.4697	25.3095	25.217	23.4709	S	0.998661	1550	TPGVQGVRKAEQRKLSSADSPDSGNKCGMVD	Skt;Etl4	Sickle tail protein	A2AQ25
NaN	NaN	NaN	NaN	NaN	NaN	NaN	NaN	23.9299	23.2139	21.549	22.3782	NaN	NaN	NaN	NaN	22.8962	NaN	NaN	NaN	21.1455	20.0718	NaN	S	0.91703	1554	QGVRKAEQRKLSSADSPDSGNKCGMVDDQFE	Skt;Etl4	Sickle tail protein	A2AQ25
NaN	NaN	NaN	NaN	NaN	NaN	NaN	NaN	27.3017	26.5706	26.8495	27.1185	27.3305	27.0759	27.2439	27.0521	26.1201	27.2439	26.7667	27.1015	26.5499	27.0659	27.5344	S	0.999996	361	IPRDRLSSLPVSRSISPSPSAILERRDVKPD	Skt;Etl4	Sickle tail protein	A2AQ25
NaN	NaN	NaN	NaN	NaN	NaN	NaN	NaN	24.4709	24.3658	24.3679	24.6575	24.8558	24.5142	24.7978	24.3818	24.4098	24.5975	24.437	24.5521	24.2332	24.0728	24.9345	S	0.986884	363	RDRLSSLPVSRSISPSPSAILERRDVKPDED	Skt;Etl4	Sickle tail protein	A2AQ25
NaN	NaN	NaN	NaN	NaN	NaN	NaN	NaN	25.0444	28.3749	26.5818	26.0376	25.7524	NaN	25.7082	26.0586	26.1858	26.5989	NaN	26.1047	24.5178	25.6184	28.4817	S	0.999753	1843	PNAPATKPSIASTPLSPQAGRSAHSASLIPS	Skt;Etl4	Sickle tail protein	A2AQ25
NaN	NaN	NaN	NaN	NaN	NaN	NaN	NaN	24.5692	24.1097	NaN	NaN	22.9468	NaN	23.423	23.5477	NaN	23.6043	NaN	23.2809	21.5864	24.2862	NaN	S	0.927582	1466	IFDEPMDIRSAYKRLSTIFEECDEELERMLT	Skt;Etl4	Sickle tail protein	A2AQ25
NaN	NaN	NaN	NaN	NaN	NaN	NaN	NaN	25.6812	NaN	24.5274	25.8083	25.029	24.9641	25.4174	23.5455	24.0059	24.6757	24.898	23.5735	25.209	25.4526	24.7487	S	0.999998	1647	PEDALKTMARRQEQLSPEGTLPASRTDEIRK	Skt;Etl4	Sickle tail protein	A2AQ25
23.4283	23.1512	23.2605	22.8394	23.585	23.7436	24.1074	24.4199	NaN	NaN	24.8424	25.4851	25.1276	25.2721	25.9375	NaN	24.7408	25.6656	25.3471	NaN	24.2726	24.5605	25.1797	S	0.999807	169	GEVPSPFARGSRTRASLPVVRSANQTKERSL	Skt;Etl4	Sickle tail protein	A2AQ25
NaN	NaN	NaN	NaN	NaN	NaN	NaN	NaN	NaN	25.3989	23.075	NaN	23.98	NaN	NaN	23.672	NaN	NaN	NaN	21.5031	NaN	NaN	NaN	S	0.993778	358	PPASASPSAVPNGPQSPKQPKEPLSHRFNEF	Fnbp1	Formin-binding protein 1	Q80TY0
NaN	NaN	25.6993	25.4725	NaN	25.1641	25.0112	25.3307	NaN	NaN	24.3001	NaN	25.0738	NaN	26.0696	26.0669	26.1689	26.1193	NaN	24.7307	25.7726	NaN	NaN	S	1	90	KIAIWLKDCRTPLGASLDEQSSGTPKGVLVR	Ssfa2	Sperm-specific antigen 2 homolog	Q922B9
NaN	NaN	NaN	NaN	NaN	NaN	NaN	NaN	23.9457	NaN	23.1855	22.3385	NaN	22.7141	21.1273	22.2729	22.2584	22.2452	22.3562	21.3619	21.2808	22.6836	23.3564	S	0.793888	207	PDIASKIPSRFFNSSSFARGIDIKVFLSAQM	Ssfa2	Sperm-specific antigen 2 homolog	Q922B9
23.0778	22.5538	23.335	22.5077	22.2427	22.5397	NaN	23.6404	25.0542	24.8178	25.349	26.3328	25.7569	25.3184	26.6759	25.953	26.638	26.1284	25.2722	25.5748	26.006	26.6429	26.6417	S	1	758	LLSPVRVVSSVNVRLSPGKETRCSPPSFTYK	Ssfa2	Sperm-specific antigen 2 homolog	Q922B9
NaN	NaN	NaN	NaN	NaN	NaN	NaN	NaN	NaN	NaN	NaN	NaN	NaN	NaN	24.0361	22.9859	24.0564	24.7639	22.9584	NaN	NaN	22.047	24.7216	S	0.878143	109	QSSGTPKGVLVRNGGSFEDDLSLGAEANHLH	Ssfa2	Sperm-specific antigen 2 homolog	Q922B9
25.8237	25.9285	25.8132	25.6515	25.8695	25.6697	26.2425	26.2437	26.2877	26.095	26.0867	26.1886	26.2182	25.8855	26.3529	25.9822	26.2092	26.074	25.5965	25.2759	25.677	26.3022	26.0802	S	0.999925	738	RYLLAKAGYPLRRSQSLPTTLLSPVRVVSSV	Ssfa2	Sperm-specific antigen 2 homolog	Q922B9
22.8451	22.8709	22.6394	22.5805	21.7792	NaN	24.0791	22.7742	NaN	NaN	NaN	NaN	NaN	NaN	NaN	NaN	NaN	NaN	NaN	NaN	NaN	NaN	NaN	S	0.995392	1051	SPFRPSALPGMCGSRSVDNLSCPSPLNVMEP	Ssfa2	Sperm-specific antigen 2 homolog	Q922B9
22.4937	22.7918	22.624	23.0866	23.2677	22.5294	23.4311	23.6676	25.4874	22.2562	24.6896	24.7937	NaN	24.1653	23.6881	24.1661	23.1386	23.3888	NaN	24.5537	NaN	NaN	22.8051	S	0.997595	1036	RLLGLDEQLRAVRVPSPFRPSALPGMCGSRS	Ssfa2	Sperm-specific antigen 2 homolog	Q922B9
23.0311	NaN	23.0725	23.7719	24.2355	NaN	24.1381	24.6766	25.7414	NaN	NaN	23.7219	24.7085	NaN	24.3911	24.3738	24.2723	23.5973	NaN	NaN	NaN	23.8097	23.7032	S	0.989669	897	GLEPSEMEKAAPCTHSPPEKPSRLALDTSLV	Secisbp2l	Selenocysteine insertion sequence-binding protein 2-like	Q6A098
NaN	NaN	NaN	NaN	NaN	NaN	NaN	NaN	NaN	NaN	NaN	NaN	NaN	NaN	NaN	NaN	NaN	NaN	NaN	NaN	NaN	NaN	23.391	S	0.832991	1448	RSKGRWSQQKTRSSKSPTPVKPTEPCTPSKY	Bcorl1	BCL-6 corepressor-like protein 1	A2AQH4
23.0083	NaN	25.3349	24.5447	24.2836	23.0189	23.9226	24.9384	NaN	NaN	22.7876	25.6275	24.4669	NaN	25.2036	NaN	NaN	NaN	NaN	NaN	NaN	22.5002	24.6962	S	1	540	VPSSVTDVALPALLDSDEERMITHFERSKME	Tmem87a	Transmembrane protein 87A	Q8BXN9
26.4071	26.6413	NaN	26.6292	26.0485	26.3789	27.3161	27.2449	NaN	28.6067	28.2291	29.7776	28.2326	28.6251	29.0164	27.0558	28.4709	27.6199	25.1465	30.705	30.7315	30.5848	29.0625	S	1	685	NSSSNNREKKADREQSPVSKTKQSSQDNEVK	Ppig	Peptidyl-prolyl cis-trans isomerase G	A2AR02
NaN	NaN	NaN	NaN	NaN	NaN	NaN	NaN	NaN	NaN	NaN	NaN	NaN	NaN	NaN	26.8226	NaN	NaN	28.6476	NaN	NaN	NaN	NaN	S	0.772355	688	SNNREKKADREQSPVSKTKQSSQDNEVKSST	Ppig	Peptidyl-prolyl cis-trans isomerase G	A2AR02
22.1414	21.9533	NaN	23.0352	23.6098	22.5068	23.1064	22.9955	NaN	NaN	NaN	NaN	NaN	NaN	NaN	NaN	NaN	NaN	NaN	NaN	NaN	NaN	NaN	S	1	431	RKVEKEKKAKDHKSESKERDIRRNSEKDDKY	Ppig	Peptidyl-prolyl cis-trans isomerase G	A2AR02
24.6882	24.0391	25.8757	25.4115	25.5423	25.4439	26.2218	26.3342	28.2547	NaN	23.8987	27.561	27.349	27.3963	27.639	25.1463	27.4025	27.0573	28.0746	27.4967	29.4489	30.5518	27.9583	S	1	395	KGDKSELNEIKENQRSPVRVKEKKITDHRHM	Ppig	Peptidyl-prolyl cis-trans isomerase G	A2AR02
NaN	NaN	NaN	NaN	NaN	NaN	NaN	NaN	25.0995	22.5661	23.3539	NaN	22.9959	24.1702	22.1822	24.2702	NaN	22.4906	NaN	24.2692	25.6247	20.9335	NaN	S	1	411	PVRVKEKKITDHRHMSESPNRKVEKEKKAKD	Ppig	Peptidyl-prolyl cis-trans isomerase G	A2AR02
20.9769	20.8894	21.3637	22.7302	22.6785	21.9085	21.9892	22.5495	NaN	25.8511	24.6809	26.2431	20.2537	25.349	26.2166	NaN	24.0205	25.0617	26.0235	24.7779	25.7652	23.4097	NaN	S	1	413	RVKEKKITDHRHMSESPNRKVEKEKKAKDHK	Ppig	Peptidyl-prolyl cis-trans isomerase G	A2AR02
NaN	NaN	NaN	NaN	NaN	NaN	NaN	NaN	NaN	NaN	22.6689	NaN	NaN	NaN	NaN	NaN	NaN	NaN	NaN	NaN	NaN	22.0776	NaN	S	0.891773	742	ENDHVHDKNKKCDHESSPGTDEDKSG_____	Ppig	Peptidyl-prolyl cis-trans isomerase G	A2AR02
NaN	NaN	NaN	NaN	NaN	NaN	NaN	NaN	NaN	25.0399	24.4005	24.9695	23.1105	NaN	25.373	24.6899	24.2499	24.5577	25.4433	22.2474	25.6358	23.82	23.9711	S	0.991027	743	NDHVHDKNKKCDHESSPGTDEDKSG______	Ppig	Peptidyl-prolyl cis-trans isomerase G	A2AR02
25.5715	23.2063	25.1647	23.9183	23.2212	23.2847	24.5103	25.071	NaN	29.1429	NaN	26.9861	NaN	NaN	28.1457	28.6718	27.3526	NaN	NaN	NaN	NaN	NaN	29.07	S	1	288	EEIPPIPENRFLMRKSPPKADDKERKNRERE	Ppig	Peptidyl-prolyl cis-trans isomerase G	A2AR02
23.3031	22.9006	23.896	23.5676	23.1555	23.5622	24.4091	24.688	NaN	28.6443	25.2105	28.4307	29.3155	28.7042	27.5107	27.9732	28.5924	29.0165	29.605	28.5284	28.2878	28.3264	28.9272	S	0.908438	714	VKSSTLKNQEDEKTRSPVEKENQKSKGQEND	Ppig	Peptidyl-prolyl cis-trans isomerase G	A2AR02
NaN	NaN	NaN	NaN	NaN	NaN	NaN	NaN	NaN	23.4699	23.5323	22.9742	22.2714	22.9053	24.1805	23.8886	22.9291	23.8049	NaN	21.8024	NaN	NaN	22.7009	S	0.921279	959	CPGKASDEPDRALQTSPQPVEGTGLPRRSPL	Ppip5k1	Inositol hexakisphosphate and diphosphoinositol-pentakisphosphate kinase 1	A2ARP1
NaN	NaN	NaN	NaN	NaN	NaN	NaN	NaN	NaN	NaN	NaN	NaN	NaN	NaN	21.6247	20.1785	NaN	21.7117	21.4471	NaN	NaN	NaN	21.0966	S	0.931631	1147	HQASDSPFSPPRTLHSPPLQLRHRSEKPPWY	Ppip5k1	Inositol hexakisphosphate and diphosphoinositol-pentakisphosphate kinase 1	A2ARP1
22.7016	NaN	25.9935	NaN	NaN	22.6457	22.493	NaN	23.6992	26.9507	25.9065	26.7556	24.8777	24.8794	26.1007	25.7812	25.4205	25.7875	24.171	24.6915	25.0855	24.9204	27.1473	S	1	667	VIEKAELEEMEEVHPSDEEEEETKAESFYQK	Map1a	Microtubule-associated protein 1A;MAP1A heavy chain;MAP1 light chain LC2	Q9QYR6
24.3014	24.2973	24.7445	25.7115	25.2454	25.008	24.9675	25.8925	NaN	25.8917	23.1642	28.4205	29.3358	28.9595	26.8622	26.9599	29.4931	NaN	29.3011	26.5374	27.1933	27.3693	30.0056	S	1	2591	QGRPGRKAPGRAKPASPARRLDIRGKRSPTP	Map1a	Microtubule-associated protein 1A;MAP1A heavy chain;MAP1 light chain LC2	Q9QYR6
24.8142	24.4449	NaN	24.6379	24.1629	24.5426	24.6423	25.0907	27.923	24.0169	NaN	23.462	NaN	NaN	NaN	27.4952	28.1767	28.0344	27.9731	NaN	NaN	NaN	NaN	S	1	1606	DGAVPEKTRALGLEESPEEEGKAREQEEKYW	Map1a	Microtubule-associated protein 1A;MAP1A heavy chain;MAP1 light chain LC2	Q9QYR6
24.4241	24.5944	24.9338	24.8536	24.124	24.6746	24.8728	24.575	22.4746	27.3053	NaN	26.0714	25.1056	26.2529	NaN	NaN	NaN	25.5294	NaN	24.773	24.811	NaN	26.4114	S	0.954991	2209	VTKAPSLDSSLPQLPSPSSPGAPLLSNLPRP	Map1a	Microtubule-associated protein 1A;MAP1A heavy chain;MAP1 light chain LC2	Q9QYR6
NaN	NaN	NaN	NaN	NaN	NaN	NaN	NaN	25.2941	NaN	26.067	NaN	NaN	NaN	25.3475	25.4017	24.2571	NaN	25.2961	NaN	NaN	NaN	NaN	S	0.812615	2211	KAPSLDSSLPQLPSPSSPGAPLLSNLPRPAS	Map1a	Microtubule-associated protein 1A;MAP1A heavy chain;MAP1 light chain LC2	Q9QYR6
27.2173	27.5359	26.6483	26.9732	26.5859	27.0943	26.9274	27.2777	NaN	26.3179	26.7304	27.1245	26.6737	26.6067	26.3173	25.4894	26.9369	26.921	NaN	26.2754	26.42	26.7017	25.9912	S	0.999998	981	HPGEPALGEVEERCLSPDDSTVKMASPPPSG	Map1a	Microtubule-associated protein 1A;MAP1A heavy chain;MAP1 light chain LC2	Q9QYR6
NaN	NaN	NaN	NaN	NaN	NaN	NaN	NaN	26.3274	25.6832	25.9139	25.506	25.7941	26.5647	26.3268	25.2635	25.7898	NaN	26.066	24.9601	24.387	25.0153	26.3417	S	1	644	EAELTPENIAAAREESEPEVKEDVIEKAELE	Map1a	Microtubule-associated protein 1A;MAP1A heavy chain;MAP1 light chain LC2	Q9QYR6
23.786	24.034	23.3182	23.7918	23.7757	23.8811	23.7331	23.9381	NaN	24.2985	25.2098	23.4499	24.2881	23.8207	24.8032	NaN	NaN	NaN	NaN	NaN	NaN	NaN	22.5915	S	1	526	AAPPPAASGHRELALSSPEDLTQDFEELKRE	Map1a	Microtubule-associated protein 1A;MAP1A heavy chain;MAP1 light chain LC2	Q9QYR6
NaN	NaN	22.765	22.7601	22.659	22.5228	22.6406	22.5964	24.1683	NaN	NaN	NaN	NaN	NaN	22.7253	21.882	NaN	20.8926	NaN	NaN	17.8873	NaN	NaN	S	1	527	APPPAASGHRELALSSPEDLTQDFEELKREE	Map1a	Microtubule-associated protein 1A;MAP1A heavy chain;MAP1 light chain LC2	Q9QYR6
NaN	NaN	NaN	NaN	NaN	NaN	NaN	NaN	NaN	26.2469	25.4389	NaN	NaN	NaN	NaN	NaN	NaN	26.4789	NaN	NaN	25.553	25.4529	26.5874	S	0.872923	500	KVDKGRAARGEKELSSEPRTPPAQKGAAPPP	Map1a	Microtubule-associated protein 1A;MAP1A heavy chain;MAP1 light chain LC2	Q9QYR6
25.9285	25.0353	25.6954	26.5363	27.3169	27.3642	27.5635	27.178	26.6655	26.0446	25.9935	26.4422	25.7848	25.3448	26.1854	25.9855	26.0551	26.1988	26.1923	26.459	26.6931	26.5287	26.4331	S	1	1580	EDKSTTPKEMTLDQKSPEKAKGVEQQDGAVP	Map1a	Microtubule-associated protein 1A;MAP1A heavy chain;MAP1 light chain LC2	Q9QYR6
26.2411	27.0065	26.4579	27.0087	27.5413	26.3505	26.6744	27.5159	NaN	NaN	25.8139	27.0277	26.0086	26.6017	26.3344	26.5663	26.493	26.1056	26.6192	NaN	26.0395	25.3096	26.2882	S	0.982802	1634	KYWKEQDVVQGWRETSPTRGEPVPAWEGKSP	Map1a	Microtubule-associated protein 1A;MAP1A heavy chain;MAP1 light chain LC2	Q9QYR6
23.4876	NaN	NaN	NaN	NaN	21.6187	22.0638	25.0273	NaN	NaN	NaN	NaN	NaN	NaN	NaN	NaN	NaN	NaN	NaN	NaN	NaN	NaN	NaN	S	0.83231	2281	GNEPAAHSLWDLTPLSPAPLASRDLAPAPAP	Map1a	Microtubule-associated protein 1A;MAP1A heavy chain;MAP1 light chain LC2	Q9QYR6
22.5057	23.1955	23.6731	22.4739	NaN	22.3643	22.4445	22.8379	NaN	24.9155	23.4661	24.9037	24.6785	24.1069	23.2649	23.5355	NaN	NaN	NaN	NaN	23.6914	23.6923	NaN	S	1	908	TISPTSSLEEDKGFKSPPCEDFSVTGESEKK	Map1a	Microtubule-associated protein 1A;MAP1A heavy chain;MAP1 light chain LC2	Q9QYR6
24.4056	23.8064	NaN	25.4396	25.0235	25.3218	25.6171	25.4071	NaN	NaN	NaN	NaN	NaN	NaN	NaN	20.6259	23.4915	NaN	23.8826	23.65	24.4333	22.7108	NaN	S	1	2603	KPASPARRLDIRGKRSPTPGKGPVDRTSRAL	Map1a	Microtubule-associated protein 1A;MAP1A heavy chain;MAP1 light chain LC2	Q9QYR6
25.8186	26.4308	NaN	26.7412	27.2195	26.4708	27.0883	27.5286	25.2636	27.5414	NaN	NaN	20.2024	NaN	NaN	NaN	NaN	NaN	22.6856	NaN	NaN	NaN	NaN	S	1	319	VPANLKPSKIKHRADSKESLKAAPKTAMSKL	Map1a	Microtubule-associated protein 1A;MAP1A heavy chain;MAP1 light chain LC2	Q9QYR6
23.2811	21.5955	23.3163	NaN	22.7984	22.4231	23.1165	23.3604	NaN	NaN	NaN	NaN	NaN	NaN	NaN	NaN	NaN	NaN	NaN	NaN	NaN	NaN	NaN	S	1	322	NLKPSKIKHRADSKESLKAAPKTAMSKLAKR	Map1a	Microtubule-associated protein 1A;MAP1A heavy chain;MAP1 light chain LC2	Q9QYR6
23.84	23.6231	23.732	NaN	23.866	23.9586	24.6677	24.7736	25.7313	24.6262	25.8889	26.383	25.4917	25.2891	26.0183	NaN	NaN	NaN	24.766	23.713	24.2605	24.7553	25.1503	S	0.999782	1289	GSSFSHSALSGDRKHSPGEITGPGGHFMTSD	Map1a	Microtubule-associated protein 1A;MAP1A heavy chain;MAP1 light chain LC2	Q9QYR6
NaN	NaN	NaN	NaN	NaN	NaN	NaN	NaN	NaN	NaN	NaN	NaN	NaN	NaN	NaN	NaN	NaN	NaN	NaN	NaN	NaN	NaN	23.0103	S	0.764752	1762	SPVGLPPEEEDKLTRSPFEIISPPASPPEMT	Map1a	Microtubule-associated protein 1A;MAP1A heavy chain;MAP1 light chain LC2	Q9QYR6
25.1522	25.1074	25.5151	25.4715	25.5569	25.1826	25.7066	24.0763	27.1844	26.7759	26.6308	27.0041	25.8239	26.4584	26.8563	26.3866	26.5737	26.0489	25.9976	26.2627	26.3482	26.6232	26.4725	S	1	991	EERCLSPDDSTVKMASPPPSGPPSAAHTPFH	Map1a	Microtubule-associated protein 1A;MAP1A heavy chain;MAP1 light chain LC2	Q9QYR6
24.6819	23.9611	25.9087	25.2142	25.3461	25.3403	25.5138	25.7709	26.1513	25.1471	24.5795	NaN	24.0823	24.745	25.2824	25.5145	25.9051	26.1644	25.1914	25.7288	25.7593	26.017	26.65	S	1	611	PDFPEDKGSKNRAPDSGAEVEREKETWEERK	Map1a	Microtubule-associated protein 1A;MAP1A heavy chain;MAP1 light chain LC2	Q9QYR6
24.076	23.9921	24.3766	25.3272	25.4819	25.215	26.0651	26.3526	24.4732	23.3283	23.6428	24.4201	22.3233	NaN	22.6442	23.8635	25.2826	24.7019	24.6385	21.3715	NaN	24.1387	24.2008	S	1	1159	SVVSPDTAKQEATPRSPCTPKEQQLHKDLWP	Map1a	Microtubule-associated protein 1A;MAP1A heavy chain;MAP1 light chain LC2	Q9QYR6
25.3225	24.9767	24.6639	24.5084	25.374	24.8997	25.2268	25.2442	24.7325	NaN	23.0877	24.2199	24.0492	25.499	25.4058	24.9328	24.1048	24.4947	25.6262	NaN	21.7292	25.2251	NaN	S	0.999996	1205	SPSKETSLDISSKQLSPESLGTLQFGELSLG	Map1a	Microtubule-associated protein 1A;MAP1A heavy chain;MAP1 light chain LC2	Q9QYR6
21.2661	21.0243	NaN	NaN	22.7229	22.8317	NaN	NaN	NaN	NaN	23.4566	NaN	24.4934	NaN	NaN	NaN	NaN	NaN	NaN	NaN	NaN	NaN	NaN	S	0.911107	1208	KETSLDISSKQLSPESLGTLQFGELSLGKEE	Map1a	Microtubule-associated protein 1A;MAP1A heavy chain;MAP1 light chain LC2	Q9QYR6
NaN	NaN	NaN	NaN	NaN	NaN	NaN	NaN	25.2851	26.0509	25.7271	25.2581	24.2444	25.2939	24.5576	25.3284	24.4447	24.9334	25.0141	NaN	NaN	NaN	25.4336	S	0.997942	1062	PEEAMSEEGKVPLSRSPQAQDTLGSLAGGQT	Map1a	Microtubule-associated protein 1A;MAP1A heavy chain;MAP1 light chain LC2	Q9QYR6
24.6994	24.0807	NaN	23.7125	NaN	NaN	24.1727	24.5916	NaN	NaN	NaN	NaN	NaN	NaN	NaN	NaN	NaN	NaN	NaN	NaN	NaN	NaN	NaN	S	0.887758	2623	KGPVDRTSRALPRPRSTPSQVTSEEKDGHSP	Map1a	Microtubule-associated protein 1A;MAP1A heavy chain;MAP1 light chain LC2	Q9QYR6
24.1535	24.1007	24.314	22.5643	23.7327	23.9258	23.8485	24.4733	NaN	NaN	NaN	NaN	NaN	NaN	NaN	NaN	NaN	NaN	NaN	NaN	NaN	NaN	NaN	S	0.925801	895	EATQGLDYVPSAGTISPTSSLEEDKGFKSPP	Map1a	Microtubule-associated protein 1A;MAP1A heavy chain;MAP1 light chain LC2	Q9QYR6
NaN	NaN	NaN	NaN	NaN	NaN	NaN	NaN	NaN	25.5887	NaN	NaN	24.3068	NaN	25.3587	23.4261	23.1812	23.8613	NaN	22.9726	NaN	23.3592	NaN	S	0.826825	1060	PGPEEAMSEEGKVPLSRSPQAQDTLGSLAGG	Map1a	Microtubule-associated protein 1A;MAP1A heavy chain;MAP1 light chain LC2	Q9QYR6
27.7382	27.9657	27.7365	27.9009	27.4519	27.5395	28.4364	28.6313	29.3933	29.6059	29.4861	29.8455	29.4116	29.1999	29.9455	29.2917	29.6811	29.6237	29.521	29.2584	29.1933	28.7647	29.7966	S	1	1789	PEMTGQRVPSAPGQESPVPDTKSTPPTRNEP	Map1a	Microtubule-associated protein 1A;MAP1A heavy chain;MAP1 light chain LC2	Q9QYR6
26.1781	25.6427	26.8719	26.4494	26.4008	27.115	26.8901	27.3392	28.4413	28.2336	NaN	28.2413	27.1984	27.464	27.3412	27.1524	28.5938	27.7748	27.4186	NaN	27.5711	27.1365	28.7061	S	0.892906	384	KPPEKPSKPERVRTESSEALKAEKRKLIKDK	Map1a	Microtubule-associated protein 1A;MAP1A heavy chain;MAP1 light chain LC2	Q9QYR6
26.9812	26.6784	NaN	NaN	NaN	26.0531	NaN	NaN	26.3558	NaN	NaN	23.4581	22.4021	24.6159	23.3318	24.12	24.1958	22.4472	26.5589	NaN	NaN	NaN	NaN	S	1	1747	PLPQKGLEVERWLAESPVGLPPEEEDKLTRS	Map1a	Microtubule-associated protein 1A;MAP1A heavy chain;MAP1 light chain LC2	Q9QYR6
22.8862	NaN	22.6452	23.9145	24.1425	24.2105	NaN	NaN	24.0193	NaN	NaN	20.5923	22.0258	19.5419	22.5965	22.9206	21.5499	22.6158	NaN	NaN	NaN	NaN	23.5549	S	1	32	KQSDSVKGKRRDDGLSAAARKQRDSEIMQQK	Serf2	Small EDRK-rich factor 2	P84102
23.1686	23.5418	22.8601	22.8229	24.6612	25.2188	25.1617	24.7665	26.3918	26.1512	26.0575	26.0381	25.8887	25.6174	26.1889	26.0182	26.0789	25.2984	26.0105	25.1583	25.7075	25.9978	25.8787	S	0.882902	4624	MDTEQKEAVAVAPPPSPSLPAKASKRSSTPG	Lrp2	Low-density lipoprotein receptor-related protein 2	A2ARV4
23.8845	NaN	23.5099	23.4639	23.784	24.1496	24.5255	24.7873	26.7183	NaN	26.2837	NaN	25.9974	26.0549	26.5485	25.947	26.1703	26.4763	26.244	25.2154	NaN	NaN	NaN	S	0.785969	280	LPAQRAASPYSQRPASPTAVRRVGSVTSRQT	Pkp4	Plakophilin-4	Q68FH0
NaN	NaN	NaN	NaN	NaN	NaN	NaN	NaN	24.0922	23.7724	NaN	23.9306	23.6683	NaN	24.2677	23.9321	24.0327	23.9461	NaN	23.3562	23.8861	23.4016	22.2495	S	0.999862	220	NRAMRRVSSVPSRAQSPSYVTSTGVSPSRGS	Pkp4	Plakophilin-4	Q68FH0
NaN	NaN	NaN	NaN	NaN	NaN	NaN	NaN	24.7141	NaN	NaN	NaN	NaN	NaN	24.4687	23.5035	23.1718	NaN	24.4987	NaN	NaN	NaN	22.9795	S	0.999136	75	QIVASQLERCRLGAESPSIASTSSTEKSFPW	Pkp4	Plakophilin-4	Q68FH0
NaN	NaN	23.1945	NaN	21.4808	21.2403	19.7746	20.8981	NaN	NaN	NaN	NaN	NaN	NaN	25.6985	NaN	24.1534	23.9668	NaN	NaN	NaN	25.1346	26.7912	S	0.890293	775	RLLGLNELDDLLGKESPSKDSEPSCWGKKKK	Pkp4	Plakophilin-4	Q68FH0
NaN	NaN	NaN	NaN	NaN	NaN	NaN	NaN	NaN	NaN	NaN	26.42	25.7735	NaN	NaN	NaN	27.0122	NaN	NaN	25.6776	NaN	NaN	26.6278	S	0.792572	334	DAQTRVASPSQGQVGSSSPKRSGMTAVPQHL	Pkp4	Plakophilin-4	Q68FH0
24.0571	23.5995	NaN	24.7268	24.2241	25.145	25.3035	NaN	NaN	NaN	25.7868	26.5448	NaN	26.2793	26.1986	25.9295	NaN	NaN	NaN	NaN	27.1996	25.7898	NaN	S	0.785066	336	QTRVASPSQGQVGSSSPKRSGMTAVPQHLGP	Pkp4	Plakophilin-4	Q68FH0
24.5993	24.4249	24.7244	24.4544	24.5506	24.9331	25.259	25.675	NaN	26.3941	26.4066	26.7605	26.5441	26.5386	26.9788	25.6772	25.1642	26.6135	26.71	24.9957	26.1446	26.4563	25.721	S	0.999999	313	PNGPVPQYQTTTRVGSPLTLTDAQTRVASPS	Pkp4	Plakophilin-4	Q68FH0
NaN	NaN	NaN	NaN	NaN	NaN	23.4243	NaN	NaN	23.6299	NaN	NaN	NaN	NaN	NaN	23.2904	22.5444	23.2297	NaN	NaN	NaN	NaN	NaN	S	0.999877	1370	NVTKTQDRLHAALDVSPGLGSQPDTSESHQR	Ccdc141		E9Q8Q6
22.6437	19.2315	NaN	22.7287	23.063	23.1793	NaN	23.6402	24.5485	24.0454	23.548	24.2421	23.4228	23.5518	24.4347	23.609	22.4068	21.8399	23.7327	NaN	NaN	23.4438	22.7816	S	1	243	LSPVRVQDRADLAPPSPQPPMLAPFAKSQLP	Taf3	Transcription initiation factor TFIID subunit 3	Q5HZG4
NaN	NaN	NaN	NaN	NaN	NaN	NaN	NaN	NaN	NaN	21.2219	21.7294	20.7736	NaN	22.7282	19.8804	NaN	NaN	NaN	NaN	20.1613	20.8854	21.4542	S	0.799867	669	TQLVLPPKEMALPLFSPSAVRVPAMLPAFSP	Taf3	Transcription initiation factor TFIID subunit 3	Q5HZG4
23.1495	23.1004	22.3735	22.8672	23.0057	23.0386	23.388	23.8017	24.6697	24.9555	23.8348	24.708	23.5475	NaN	24.5353	24.6703	23.7329	24.3237	24.4418	NaN	22.8042	22.1878	24.536	S	0.999995	229	EPLSSINPQKTPPVLSPVRVQDRADLAPPSP	Taf3	Transcription initiation factor TFIID subunit 3	Q5HZG4
NaN	NaN	NaN	NaN	NaN	NaN	NaN	NaN	24.4397	NaN	NaN	NaN	24.0016	24.1809	24.6737	26.4917	25.1118	26.254	NaN	23.5068	23.2514	24.1212	23.1247	S	1	297	KTKSPKAALSPARLGSPIRSPKTIPKEKKSP	Taf3	Transcription initiation factor TFIID subunit 3	Q5HZG4
NaN	NaN	NaN	NaN	NaN	NaN	NaN	NaN	NaN	NaN	NaN	NaN	NaN	NaN	NaN	NaN	NaN	NaN	NaN	NaN	NaN	22.6829	NaN	S	1	301	PKAALSPARLGSPIRSPKTIPKEKKSPGRSK	Taf3	Transcription initiation factor TFIID subunit 3	Q5HZG4
NaN	NaN	NaN	NaN	NaN	NaN	NaN	NaN	22.8425	NaN	NaN	NaN	NaN	NaN	NaN	NaN	NaN	NaN	23.2104	NaN	NaN	NaN	NaN	S	0.848043	199	PEVEEMPSMKRPRLLSTKGDSLDVVLLEARE	Taf3	Transcription initiation factor TFIID subunit 3	Q5HZG4
22.3807	22.6036	NaN	22.4718	22.3727	NaN	22.999	NaN	NaN	22.357	NaN	21.5993	NaN	NaN	NaN	NaN	NaN	NaN	24.8699	19.2888	20.2479	19.8872	NaN	S	0.808175	204	MPSMKRPRLLSTKGDSLDVVLLEAREPLSSI	Taf3	Transcription initiation factor TFIID subunit 3	Q5HZG4
NaN	NaN	NaN	NaN	NaN	NaN	NaN	NaN	24.9771	24.1141	23.9505	24.9172	NaN	NaN	23.7035	NaN	NaN	NaN	NaN	22.4928	22.5784	23.8442	NaN	S	0.999993	183	EVINDENFLGKRPLDSPEVEEMPSMKRPRLL	Taf3	Transcription initiation factor TFIID subunit 3	Q5HZG4
24.3245	24.2721	24.2079	23.8248	23.4975	23.5497	23.8813	24.0833	NaN	25.7994	NaN	24.8573	24.0785	25.3082	25.6851	25.4423	25.489	25.1868	25.3654	23.9429	25.3114	25.1996	24.4724	S	0.993551	411	PPSDPVMTTAKADASSLTVDVTSPASKVPTT	Gorasp2	Golgi reassembly-stacking protein 2	Q99JX3
NaN	NaN	NaN	NaN	NaN	NaN	NaN	NaN	26.3926	26.4098	26.446	26.8275	NaN	25.7606	25.4639	NaN	22.1715	23.3414	25.8198	25.7746	24.8572	24.6643	26.8364	S	0.928847	418	TTAKADASSLTVDVTSPASKVPTTVEDRVSD	Gorasp2	Golgi reassembly-stacking protein 2	Q99JX3
25.097	NaN	24.9016	NaN	25.0984	24.9998	25.1881	25.1159	26.5658	NaN	25.148	26.792	26.3088	NaN	26.501	25.3461	26.3104	25.9021	26.2978	24.2292	25.7137	25.0481	25.7582	S	0.945388	432	TSPASKVPTTVEDRVSDCTPAVEKPVSDADA	Gorasp2	Golgi reassembly-stacking protein 2	Q99JX3
NaN	NaN	NaN	NaN	NaN	NaN	NaN	NaN	24.7375	NaN	24.4887	25.1566	24.6036	24.1254	24.9201	24.6242	24.5403	23.3045	24.7606	23.2035	23.1215	24.3952	24.6065	S	0.99453	443	EDRVSDCTPAVEKPVSDADASEPS_______	Gorasp2	Golgi reassembly-stacking protein 2	Q99JX3
22.4727	21.8446	22.1947	22.6723	22.5126	22.7293	23.0011	22.688	23.503	NaN	23.5509	23.6645	22.4099	NaN	22.1046	23.3352	23.3627	23.2877	23.8841	21.9741	23.041	23.7017	22.1824	S	0.942903	358	QLPPALESSKRDQATSMSHINLLFSRRASDY	Fam171a1		A2ATK9
22.4969	22.7001	23.975	22.1974	22.3492	22.7582	22.9734	23.4189	22.8794	22.6888	22.707	22.6653	22.8699	22.3851	23.2437	22.9095	22.689	22.3447	21.6758	20.6752	22.1186	23.2456	23.6982	S	1	460	DNLTPSGTLGKDYHKSVEIFPLKARKSMEKE	Fam171a1		A2ATK9
22.8167	23.2042	21.7363	NaN	23.0671	23.111	NaN	23.4335	NaN	NaN	NaN	NaN	NaN	NaN	NaN	NaN	NaN	NaN	NaN	NaN	NaN	NaN	NaN	S	0.999773	723	WFVSLDGRSNAHVRHSYIDLQRAGRNGSNDA	Fam171a1		A2ATK9
NaN	NaN	NaN	NaN	NaN	NaN	NaN	NaN	25.5872	NaN	24.5097	25.3043	25.1212	24.9344	25.6351	25.1885	25.0072	25.3388	25.2394	NaN	24.6018	23.7274	25.3543	S	0.996452	422	EGDLHTPMLKLSYSTSQEFSSREELLSHKEE	Fam171a1		A2ATK9
NaN	25.2505	25.231	24.9446	25.4875	25.388	26.1044	26.0648	24.933	22.0264	24.6055	NaN	23.886	25.4925	25.556	25.1351	NaN	NaN	25.9781	24.7823	NaN	24.8547	25.3459	S	0.968676	371	ATSMSHINLLFSRRASDYPGPLSVSSHSRPE	Fam171a1		A2ATK9
NaN	NaN	NaN	NaN	NaN	NaN	NaN	NaN	23.954	24.2248	22.8962	25.0404	23.1249	23.735	23.7396	23.8582	24.692	24.8437	NaN	24.2596	24.3589	23.8708	24.4332	S	0.938524	840	GGQLPSLQEETTKRTSDVPLEPLASPNQRRS	Fam171a1		A2ATK9
NaN	NaN	NaN	NaN	NaN	NaN	NaN	NaN	25.3166	25.5712	24.9671	25.5099	24.3639	24.5608	25.5687	24.9815	24.1416	25.0952	24.7797	24.4731	NaN	24.7277	24.6461	S	1	824	EDSALRCLLEGSGRRSGGQLPSLQEETTKRT	Fam171a1		A2ATK9
NaN	NaN	NaN	NaN	NaN	NaN	NaN	NaN	NaN	26.0144	25.8026	23.3943	22.9397	24.6694	24.5527	25.6793	NaN	23.9105	NaN	NaN	NaN	23.6872	23.3819	S	0.932857	13	___MAGQPSHMPHGGSPNHLCHALGPAPPPD	Nek6	Serine/threonine-protein kinase Nek6	Q9ES70
21.9997	NaN	NaN	NaN	22.6028	23.2495	23.2267	22.7683	24.7438	24.4189	23.0472	23.7939	23.9377	23.8363	24.3431	24.2613	23.9122	24.0401	23.5841	22.4358	23.56	22.6867	24.2798	S	1	763	VVIVDVKEPSPRADVSCEPLEEVEKCSDSQS	Trp53bp1;Tp53bp1	Tumor suppressor p53-binding protein 1	A2AU91
25.4123	25.5602	25.8603	25.3138	25.9061	25.094	25.8083	26.0369	25.8056	26.2516	25.549	26.367	25.4988	25.6439	26.031	25.1957	25.2122	24.8596	NaN	NaN	25.0616	24.459	25.089	S	1	1115	QQRASQEQRASQEPFSPAEDVMETDLLEGLA	Trp53bp1;Tp53bp1	Tumor suppressor p53-binding protein 1	A2AU91
23.7719	23.9929	24.389	23.9845	24.6042	24.4743	24.7058	24.9597	27.16	24.5882	27.1555	27.0594	26.9051	26.5376	27.2197	27.0489	26.565	26.6513	26.6851	26.1582	25.8151	25.3999	26.9953	S	1	822	DSKAETTEKDAVTEDSPQPPLPSVRDEPVRP	Trp53bp1;Tp53bp1	Tumor suppressor p53-binding protein 1	A2AU91
NaN	NaN	NaN	NaN	NaN	NaN	NaN	NaN	NaN	25.4184	25.4157	25.4025	NaN	25.0971	25.5833	NaN	NaN	NaN	25.1972	23.3748	NaN	NaN	24.3863	S	0.953195	851	RPDQETQQPQVQEKESPVTVDAEVADDKQLG	Trp53bp1;Tp53bp1	Tumor suppressor p53-binding protein 1	A2AU91
NaN	NaN	NaN	NaN	NaN	NaN	NaN	NaN	NaN	NaN	NaN	24.823	25.3864	NaN	25.4498	24.9605	24.7628	23.9238	NaN	NaN	NaN	NaN	NaN	S	0.99961	719	CPEAMEVETSVISIDSPQKLQVLDQELEHKD	Trp53bp1;Tp53bp1	Tumor suppressor p53-binding protein 1	A2AU91
NaN	NaN	NaN	NaN	NaN	NaN	NaN	NaN	24.1819	25.8987	25.6824	23.2713	24.1693	24.6674	25.3447	NaN	NaN	NaN	24.8271	24.1157	23.2875	NaN	23.9094	S	0.960702	652	EEAMDTKEHHPEEGFSGSEVEEVPETPCGSH	Trp53bp1;Tp53bp1	Tumor suppressor p53-binding protein 1	A2AU91
NaN	NaN	NaN	NaN	NaN	NaN	NaN	NaN	NaN	NaN	NaN	NaN	23.8146	NaN	NaN	NaN	NaN	NaN	NaN	NaN	21.0785	NaN	NaN	S	0.976866	80	DIVSNPEQSAVEQGDSNSSFNEHLKEKKASD	Trp53bp1;Tp53bp1	Tumor suppressor p53-binding protein 1	A2AU91
NaN	NaN	NaN	NaN	NaN	NaN	NaN	NaN	23.6331	23.5024	23.6349	24.1322	23.5283	NaN	22.8657	22.5775	23.4341	NaN	NaN	NaN	22.4709	22.1668	23.4122	S	0.987107	1427	VVSGPLGVEDISPSMSPDDKSFTRIMPRVPD	Trp53bp1;Tp53bp1	Tumor suppressor p53-binding protein 1	A2AU91
26.4649	26.4546	26.5057	27.1257	27.5783	27.5103	28.2052	28.4067	29.3058	28.5091	28.2847	28.7024	28.2443	28.0549	28.7516	28.6779	28.063	28.1765	28.7612	28.1829	28.0074	27.5968	28.703	S	1	1359	ADFALPSSRGGPGKLSPRKGISQTGAPVCEE	Trp53bp1;Tp53bp1	Tumor suppressor p53-binding protein 1	A2AU91
NaN	NaN	NaN	NaN	NaN	NaN	NaN	NaN	NaN	NaN	23.7453	23.6142	25.278	24.6035	24.2385	NaN	NaN	24.5145	24.4767	22.0015	24.3851	NaN	24.4393	S	0.915813	622	VCIDLTCDSGSQAVPSPATRSEALSSVLDQE	Trp53bp1;Tp53bp1	Tumor suppressor p53-binding protein 1	A2AU91
NaN	24.447	24.8043	25.6518	NaN	NaN	NaN	NaN	26.641	27.8728	27.2675	23.78	25.5032	25.8649	26.411	26.6719	25.4253	25.3214	25.5594	22.0509	26.3265	26.6783	25.4766	S	0.999933	1675	VPSGKRKLPTSEEERSPAKRGRKSATVKPGT	Trp53bp1;Tp53bp1	Tumor suppressor p53-binding protein 1	A2AU91
24.4225	24.7402	24.3331	24.5759	25.4563	25.2124	25.3097	25.1	26.8417	NaN	26.0736	26.4976	25.5362	25.9959	25.9865	25.0537	26.223	24.5429	26.5397	25.8244	25.3641	25.0319	NaN	S	0.999998	429	AMETEKPLLPSQPAVSPQASTPVSRSTPVFT	Trp53bp1		A2AU91
NaN	NaN	NaN	NaN	NaN	NaN	NaN	NaN	25.5881	NaN	23.7887	25.5716	NaN	NaN	25.339	24.7742	24.8329	NaN	25.1886	23.7227	23.7996	NaN	24.9223	S	0.929763	1096	PVGPVMDDAAPEDSASPVSQQRASQEQRASQ	Trp53bp1;Tp53bp1	Tumor suppressor p53-binding protein 1	A2AU91
NaN	NaN	NaN	NaN	NaN	NaN	NaN	NaN	25.355	NaN	23.7111	25.1669	NaN	24.8106	24.443	24.1981	25.2288	25.2761	24.3862	23.9563	NaN	NaN	NaN	S	0.99978	983	APEMDGKLSLKMKLVSPETEASEESLQFSLE	Trp53bp1;Tp53bp1	Tumor suppressor p53-binding protein 1	A2AU91
NaN	NaN	NaN	NaN	NaN	NaN	NaN	NaN	NaN	NaN	23.0773	22.9655	NaN	NaN	NaN	23.6158	22.827	NaN	23.8237	NaN	NaN	21.9389	22.3236	S	0.932905	989	KLSLKMKLVSPETEASEESLQFSLEKPTTAE	Trp53bp1;Tp53bp1	Tumor suppressor p53-binding protein 1	A2AU91
26.3143	26.5911	26.2814	26.0113	26.1999	26.6227	27.2736	27.2333	27.5795	27.2167	27.1351	27.7228	26.2787	26.3338	27.4382	26.7854	26.5086	26.4906	27.0933	25.9621	26.2818	25.5813	25.5096	S	0.999998	533	STSEYSQSSKMESLGSPRTEEDRENTQIDDT	Trp53bp1;Tp53bp1	Tumor suppressor p53-binding protein 1	A2AU91
NaN	NaN	NaN	NaN	NaN	NaN	NaN	NaN	25.8747	28.3051	26.7329	28.2351	27.6429	26.2783	27.8254	26.392	27.3116	21.9494	25.3188	25.5019	26.5147	26.9092	28.0256	S	1	368	VQESLSTNSSDLVAPSPDAFRSTPFIVPSSP	Trp53bp1;Tp53bp1	Tumor suppressor p53-binding protein 1	A2AU91
25.074	24.7303	25.493	25.192	26.1317	25.3533	26.3859	NaN	22.7601	NaN	NaN	27.0912	26.0264	NaN	27.02	25.6078	25.8627	25.2285	NaN	NaN	NaN	25.285	NaN	S	0.943982	1459	TKRTDASSSTLRRSDSPEIPFQAATGSSDGL	Trp53bp1;Tp53bp1	Tumor suppressor p53-binding protein 1	A2AU91
26.1329	25.8124	26.3336	25.9865	26.2202	26.2612	26.6312	NaN	26.7489	26.7781	25.3166	26.1515	26.4134	NaN	26.6918	25.3698	25.6369	25.4627	NaN	26.2552	NaN	NaN	26.6337	S	0.976047	268	EEQNLPLVRSEDRPSSPQVSVAAVETKEQVP	Trp53bp1;Tp53bp1	Tumor suppressor p53-binding protein 1	A2AU91
NaN	NaN	NaN	NaN	NaN	NaN	NaN	NaN	NaN	24.1067	23.66	22.3119	NaN	24.0889	23.5308	NaN	23.7008	23.658	NaN	23.2444	22.0393	NaN	24.352	S	0.915025	382	PSPDAFRSTPFIVPSSPTEQGGRKDEPMDMS	Trp53bp1;Tp53bp1	Tumor suppressor p53-binding protein 1	A2AU91
25.1671	24.8504	25.0899	24.6629	24.8694	24.8715	25.2083	25.1859	NaN	NaN	NaN	NaN	NaN	NaN	NaN	NaN	NaN	NaN	NaN	NaN	NaN	NaN	NaN	S	0.895132	464	PIPSQPEFSHDIFIPSPSLEEPSDDVKKGGG	Trp53bp1;Tp53bp1	Tumor suppressor p53-binding protein 1	A2AU91
NaN	NaN	NaN	NaN	NaN	NaN	NaN	NaN	24.8633	25.3554	25.0311	24.281	24.6349	24.3435	23.273	24.6412	23.9406	24.5794	24.066	22.6166	NaN	NaN	24.5621	S	0.852272	552	EEDRENTQIDDTEPLSPVSNSKLPADSENVL	Trp53bp1;Tp53bp1	Tumor suppressor p53-binding protein 1	A2AU91
NaN	NaN	NaN	NaN	NaN	NaN	NaN	NaN	NaN	NaN	22.8668	24.1611	23.9946	23.747	23.3485	23.4262	23.7023	24.3919	NaN	22.9386	NaN	NaN	23.5834	S	0.999923	5	___________MDSASQDINLNSPNKGVLSD	Tpd52l2	Tumor protein D54	Q9CYZ2
23.7056	23.7822	24.321	24.4044	24.2936	24.4991	24.183	24.9162	26.4766	26.7038	26.3438	27.0925	26.2034	25.8956	26.55	26.2343	26.2707	25.8441	25.5201	25.9695	25.7651	26.5179	26.3865	S	1	12	____MDSASQDINLNSPNKGVLSDFMTDVPV	Tpd52l2	Tumor protein D54	Q9CYZ2
NaN	NaN	NaN	NaN	NaN	NaN	NaN	NaN	NaN	NaN	23.4306	22.1283	NaN	NaN	NaN	22.993	NaN	NaN	NaN	NaN	25.9938	23.1872	NaN	S	0.895369	200	VGTIKSKVVGGRENGSDNLPPSPGSGDQTLP	Tpd52l2	Tumor protein D54	Q9CYZ2
24.1503	NaN	NaN	24.2307	24.7495	NaN	25.091	24.8454	27.5778	27.5491	27.594	28.0033	27.6924	27.3139	27.7473	27.4262	27.5904	26.7535	27.2672	25.8054	NaN	26.6005	27.5512	S	0.999112	206	KVVGGRENGSDNLPPSPGSGDQTLPDHAPF_	Tpd52l2	Tumor protein D54	Q9CYZ2
NaN	NaN	NaN	NaN	NaN	NaN	NaN	NaN	NaN	NaN	NaN	NaN	NaN	NaN	NaN	NaN	NaN	26.5496	NaN	NaN	25.7372	NaN	NaN	S	0.760619	209	GGRENGSDNLPPSPGSGDQTLPDHAPF____	Tpd52l2	Tumor protein D54	Q9CYZ2
28.0236	27.6009	27.1429	27.9839	28.2217	28.1733	28.5829	28.2438	29.57	25.655	28.908	28.3368	28.946	29.5249	28.2147	29.1553	28.9055	28.3354	29.3913	29.2436	28.1885	28.1059	25.9491	S	1	180	HSISMPVMRNSATFKSFEDRVGTIKSKVVGG	Tpd52l2	Tumor protein D54	Q9CYZ2
NaN	NaN	NaN	NaN	NaN	NaN	NaN	NaN	NaN	NaN	NaN	NaN	NaN	NaN	NaN	NaN	NaN	NaN	NaN	NaN	NaN	NaN	23.7055	S	0.986792	324	IPWPVMSTSENKDSDSVILTLQDEKGDAAEK	Rabepk	Rab9 effector protein with kelch motifs	Q8VCH5
25.061	24.35	24.9466	24.9384	NaN	NaN	NaN	24.8998	NaN	26.8638	26.9123	27.5896	27.1481	27.1753	27.1374	27.5361	27.5943	27.5321	26.9503	25.5655	25.7942	26.0017	27.4994	S	1	566	GSEEKVKPPRPRAPESDTGDEDQDQERDAVF	Epb4.1l1		A2AUK8
24.0112	23.4681	23.2902	24.2534	23.8373	23.5255	24.5411	24.5867	NaN	23.7934	24.723	23.7966	23.5195	23.4842	23.1073	NaN	22.6583	NaN	22.7031	NaN	21.3963	22.7555	23.3115	S	0.999852	856	DMLVTKAVVYRETDPSPEERDKKPQES____	Epb4.1l1;Epb41l1	Band 4.1-like protein 1	A2AUK8
24.9718	24.9178	25.181	25.6172	25.4321	25.0102	25.5771	25.5368	28.4904	27.8999	28.0586	27.9142	28.7506	28.3254	28.4664	27.5792	27.2518	NaN	28.6144	25.2834	25.2015	26.9502	28.0769	S	0.998824	636	FEDFSRSLPELDRDKSDSETEGLVFARDLKG	Epb4.1l1		A2AUK8
NaN	NaN	NaN	NaN	NaN	NaN	NaN	NaN	23.1938	23.7975	22.3336	22.8698	21.7921	22.187	23.2478	23.1088	NaN	NaN	20.8973	NaN	NaN	20.6549	NaN	S	0.94266	638	DFSRSLPELDRDKSDSETEGLVFARDLKGPS	Epb4.1l1		A2AUK8
NaN	NaN	NaN	NaN	NaN	NaN	NaN	NaN	NaN	NaN	23.9547	NaN	22.648	24.4601	22.5561	NaN	23.9852	NaN	24.5761	22.5706	22.9313	NaN	NaN	S	0.903113	654	ETEGLVFARDLKGPSSQEDESGGLEDSPDRG	Epb4.1l1;Epb41l1	Band 4.1-like protein 1	A2AUK8
27.6309	27.8598	26.6558	26.7615	26.5717	26.9743	27.6025	27.7482	25.2968	27.047	27.8404	26.5616	26.3767	27.0067	26.5622	25.6683	27.6568	26.929	27.7987	27.2139	23.1338	27.0703	24.9212	S	1	498	KFLDKPEDVLLKHQASINELKRTLKEPNSKL	Epb4.1l1;Epb41l1	Band 4.1-like protein 1	A2AUK8
24.8831	NaN	NaN	25.3861	24.7563	NaN	NaN	26.276	NaN	26.0925	25.0184	24.6549	24.4552	NaN	NaN	25.156	NaN	25.79	NaN	24.7215	25.3961	NaN	25.164	S	0.913445	528	LIHRDRDWDRERRLPSSPASPSPKGTPEKAS	Epb4.1l1;Epb41l1	Band 4.1-like protein 1	A2AUK8
NaN	NaN	NaN	NaN	NaN	25.1508	NaN	NaN	NaN	NaN	25.2539	NaN	25.1369	NaN	26.4994	24.8533	25.5666	NaN	NaN	25.5258	NaN	27.266	25.164	S	0.822717	529	IHRDRDWDRERRLPSSPASPSPKGTPEKASE	Epb4.1l1;Epb41l1	Band 4.1-like protein 1	A2AUK8
26.936	26.8757	26.8284	26.7367	26.6753	26.972	27.329	27.6086	28.5964	27.5777	27.6768	28.5463	28.3919	27.6513	28.7218	27.7436	28.3656	26.712	27.8205	27.8932	28.0558	27.207	28.522	S	0.996977	532	DRDWDRERRLPSSPASPSPKGTPEKASERAG	Epb4.1l1;Epb41l1	Band 4.1-like protein 1	A2AUK8
26.0061	25.807	25.5641	25.2439	25.362	26.1542	26.5113	26.4476	23.236	NaN	NaN	NaN	23.4199	23.5511	23.9089	25.3943	25.5707	27.2138	NaN	27.1332	24.981	NaN	25.3573	S	0.999904	534	DWDRERRLPSSPASPSPKGTPEKASERAGLR	Epb4.1l1;Epb41l1	Band 4.1-like protein 1	A2AUK8
25.1758	25.2759	25.3736	25.1544	24.3327	24.8199	25.8416	25.5707	NaN	25.6104	25.6404	26.0234	25.4346	25.05	25.826	24.0607	25.8349	21.9824	25.3444	24.4596	26.021	25.6481	25.9308	S	1	378	LWKVCIEHHTFFRLVSPEPPPKGFLVMGSKF	Epb4.1l1;Epb41l1	Band 4.1-like protein 1	A2AUK8
NaN	NaN	NaN	NaN	NaN	NaN	NaN	NaN	NaN	NaN	NaN	NaN	NaN	NaN	NaN	26.8805	NaN	27.0247	NaN	NaN	NaN	NaN	NaN	S	0.999778	627	VIGDYHGGAFEDFSRSLPELDRDKSDSETEG	Epb4.1l1		A2AUK8
27.5213	27.2539	27.3714	26.921	26.7781	26.7816	26.9108	27.0998	26.9811	26.4902	26.5807	27.2976	26.8232	26.5938	26.9374	26.5709	26.7903	26.8005	26.5478	26.255	26.2811	27.0867	27.3245	S	0.999999	770	MIPGPQTVATEIRSLSPIIGKDVLTSTYGAT	Epb4.1l1;Epb41l1	Band 4.1-like protein 1	A2AUK8
NaN	NaN	23.2154	NaN	NaN	NaN	22.9723	NaN	NaN	NaN	NaN	NaN	NaN	NaN	NaN	NaN	NaN	NaN	NaN	NaN	NaN	NaN	NaN	S	0.819665	554	NPQPKLPLVEQSPEDSGGQDYIETVIPSNQL	Eif2ak4	Eukaryotic translation initiation factor 2-alpha kinase 4	Q9QZ05
26.4006	26.2359	26.1884	26.3594	25.9219	26.2053	26.5077	26.6714	27.9703	27.1987	26.2243	27.5041	26.4445	26.9891	27.7218	27.5162	27.7022	27.7751	27.6975	27.0936	27.7175	27.2911	27.2873	S	0.998571	45	LKKYDGRTKPIPRKSSVEGLEPAENKCLLRA	Srp14	Signal recognition particle 14 kDa protein;Signal recognition particle 14 kDa protein, N-terminally processed	P16254
NaN	NaN	NaN	NaN	22.301	23.5868	23.6412	24.2717	25.206	21.5245	24.7948	23.4639	24.5931	24.0873	24.4422	23.7388	24.5269	23.974	21.9625	20.1087	24.3305	25.3102	22.6861	S	0.995442	1561	SSPRCISESRHTTLRSPSEMPRLKALMCGSP	Cep152	Centrosomal protein of 152 kDa	A2AUM9
NaN	NaN	NaN	NaN	NaN	NaN	NaN	23.3299	NaN	NaN	NaN	24.0711	23.6651	NaN	24.7856	NaN	NaN	NaN	NaN	22.6243	NaN	23.4118	23.5454	S	0.999902	842	SFQNPVYQMAAGLPLSPRGLGDSGSEGHSSL	Dab2ip	Disabled homolog 2-interacting protein	Q3UHC7
21.0219	NaN	21.9465	NaN	22.4397	NaN	22.8764	22.4749	23.9824	22.9371	22.7473	23.3439	22.9896	22.8505	23.8394	23.0039	21.0888	23.418	22.9941	21.6634	21.3819	22.1771	23.4373	S	0.999169	289	HLYRETDKKKKKERNSYLGLVSLPAASVAGR	Dab2ip	Disabled homolog 2-interacting protein	Q3UHC7
21.9436	22.1351	22.0693	22.2454	22.6991	22.8519	23.3629	23.069	23.7204	25.2916	23.8621	23.6036	24.2877	23.7569	24.684	24.2137	24.3019	24.4006	23.7706	23.6179	23.2816	23.3089	25.2862	S	1	978	PGTRLRQQSSSSKGDSPELKPRAMHKQGPSP	Dab2ip	Disabled homolog 2-interacting protein	Q3UHC7
24.1019	23.9905	24.4595	24.7613	24.621	24.8404	24.9927	24.8247	26.6136	24.933	25.161	24.4045	24.4968	25.027	25.4203	24.0223	22.9915	22.4918	24.4809	23.3969	23.0999	24.43	25.052	S	1	101	SIKRTKSQPKLDRNHSFRHILPGFRSAAAAA	Dab2ip	Disabled homolog 2-interacting protein	Q3UHC7
NaN	NaN	NaN	NaN	NaN	NaN	NaN	NaN	NaN	23.7733	22.2305	22.3947	NaN	23.508	24.0491	23.6018	23.7422	23.6535	NaN	23.0559	22.1411	22.9033	22.8649	S	0.997997	874	SHSNSEELAAAAKLGSFSTAAEELARRPGEL	Dab2ip	Disabled homolog 2-interacting protein	Q3UHC7
NaN	NaN	NaN	NaN	NaN	NaN	NaN	NaN	23.8453	22.8167	23.2565	23.7265	23.1843	23.1642	23.5346	23.2641	23.6492	23.6075	23.5412	22.9644	21.7526	23.5995	23.1287	S	1	1108	EDKDIQMKGIISRLMSVEEELKKDHAEMQAA	Dab2ip	Disabled homolog 2-interacting protein	Q3UHC7
26.3542	26.8291	25.8683	25.838	26.0883	26.5077	26.7579	27.1756	28.4523	28.9684	28.6037	28.331	NaN	27.7803	28.4317	28.0981	27.8204	27.9297	28.1541	27.5004	27.3235	26.4955	27.2824	S	0.99993	702	IENDLSGLIDFTRLPSPTPENKDLFFVTRSS	Dab2ip	Disabled homolog 2-interacting protein	Q3UHC7
NaN	NaN	NaN	NaN	NaN	NaN	NaN	NaN	26.4371	NaN	22.5393	NaN	25.4105	25.6312	24.7135	24.7543	24.8428	24.6124	25.6989	26.2876	24.1419	NaN	22.568	S	0.999998	1031	DEGLGPDPPHRDRLRSKEELSQAEKDLAVLQ	Dab2ip	Disabled homolog 2-interacting protein	Q3UHC7
NaN	NaN	NaN	NaN	NaN	NaN	NaN	NaN	NaN	24.1797	24.0459	23.2953	NaN	23.819	NaN	22.9123	NaN	NaN	NaN	22.8841	23.832	23.1264	23.0578	S	1	992	DSPELKPRAMHKQGPSPVSPNALDRTAAWLL	Dab2ip	Disabled homolog 2-interacting protein	Q3UHC7
24.7336	24.9529	NaN	24.9377	NaN	24.9461	25.12	NaN	26.8719	26.5079	26.2551	27.0007	26.5945	26.3263	26.7288	26.4961	26.3816	26.5178	26.2405	26.5193	26.5146	26.4377	26.8316	S	1	995	ELKPRAMHKQGPSPVSPNALDRTAAWLLTMN	Dab2ip	Disabled homolog 2-interacting protein	Q3UHC7
NaN	NaN	NaN	NaN	NaN	NaN	NaN	NaN	NaN	24.9897	24.8831	25.7949	NaN	NaN	NaN	NaN	21.1766	NaN	NaN	24.6546	25.3075	24.1116	23.6116	S	1	1140	DSKQKIIDAQEKRIASLDAANARLMSALTQL	Dab2ip	Disabled homolog 2-interacting protein	Q3UHC7
24.9463	24.4886	24.593	25.9637	26.4095	26.1818	26.9307	27.3615	27.9445	26.201	25.5985	26.2092	26.6348	20.733	26.3253	NaN	NaN	NaN	27.2633	27.608	26.2178	26.2237	27.6433	S	0.998804	895	EELARRPGELARRQMSLTEKGGQPTVPRQNS	Dab2ip	Disabled homolog 2-interacting protein	Q3UHC7
24.9268	24.562	24.9179	24.7008	25.025	25.1943	25.3164	25.3345	25.4497	24.1648	24.8531	25.5364	25.1135	25.025	25.2866	25.1043	25.2392	25.2513	24.9726	24.7472	24.4473	25.3101	25.5291	S	0.999989	747	ANEPDLQMANGSKSLSMVDLQDARTLDGEAG	Dab2ip	Disabled homolog 2-interacting protein	Q3UHC7
NaN	NaN	NaN	NaN	NaN	NaN	NaN	NaN	25.0648	25.3957	25.2263	25.9625	25.4891	25.0202	26.2155	25.7863	25.5785	25.6736	22.1494	25.4111	25.4686	24.7057	NaN	S	0.999917	1437	GKHPLGSVPSATTAQSPVGKTDASLFSSGSG	Baz2b		A2AUY4
NaN	NaN	NaN	NaN	NaN	NaN	NaN	NaN	NaN	NaN	22.6536	22.2447	20.8438	22.0865	22.7595	22.5536	22.541	22.2071	22.8002	20.156	22.1927	21.779	NaN	S	0.777301	175	SLKYGKLGQGVLVQVSPSLVKRQKTHFHDLP	Exosc2	Exosome complex component RRP4	Q8VBV3
NaN	NaN	NaN	NaN	NaN	NaN	NaN	NaN	NaN	23.0698	23.5339	21.2566	23.3569	23.6937	24.1809	24.144	23.4093	24.2254	NaN	NaN	20.1337	NaN	24.0627	S	1	124	LLSSMNLPGGELRRRSAEDELAMRGFLQEGD	Exosc2	Exosome complex component RRP4	Q8VBV3
23.4573	23.1703	22.7244	23.3888	23.0369	23.1585	23.3034	23.1817	24.4443	NaN	24.2706	24.1301	23.9127	24.0147	23.3807	24.3643	24.0059	24.2235	24.1031	23.2785	22.5975	22.1693	24.01	S	0.997784	28	FHKMGSFRRPRPRFMSSPVLSELPRFQAARQ	Prr5l	Proline-rich protein 5-like	A2AVJ5
NaN	NaN	NaN	NaN	NaN	NaN	NaN	NaN	NaN	NaN	22.8793	NaN	24.2248	24.1184	24.509	24.5229	23.5656	NaN	NaN	24.0769	NaN	23.6487	24.3369	S	0.999968	1197	ANQQQTRLKELESQVSCLEKETSELKEAMEQ	Rrbp1	Ribosome-binding protein 1	Q99PL5
22.7144	23.3851	23.234	23.1787	22.9477	22.5417	23.4478	23.3469	21.3453	21.5514	22.4502	21.5769	21.4083	NaN	22.6254	NaN	21.449	21.0769	NaN	NaN	19.8741	22.5653	NaN	S	1	187	ATPKEVPMVAVPPVGSKASSPATSSQGKKGQ	Rrbp1	Ribosome-binding protein 1	Q99PL5
NaN	NaN	NaN	NaN	NaN	NaN	NaN	NaN	25.6918	NaN	25.3113	25.6007	24.9213	NaN	24.4804	NaN	23.3026	24.022	25.024	22.6514	25.0829	25.1554	24.9664	S	1	1162	KEARAENSQLTERIRSIEALLEAGQAQDTQA	Rrbp1	Ribosome-binding protein 1	Q99PL5
NaN	NaN	NaN	NaN	NaN	NaN	NaN	NaN	NaN	24.1544	NaN	NaN	21.8959	NaN	NaN	NaN	NaN	NaN	NaN	26.9615	NaN	NaN	NaN	S	0.998059	786	KKAEGAPNQGKKKDGSPSQAKKVDAAANQGK	Rrbp1	Ribosome-binding protein 1	Q99PL5
NaN	NaN	NaN	NaN	NaN	NaN	NaN	NaN	19.0751	16.4401	17.4271	17.9053	17.2772	23.6952	14.5761	NaN	23.3516	NaN	25.0148	NaN	NaN	NaN	17.7827	S	0.999998	766	TKQEGVSNQVKKSEGSPNQGKKAEGAPNQGK	Rrbp1	Ribosome-binding protein 1	Q99PL5
NaN	NaN	NaN	NaN	NaN	NaN	NaN	NaN	23.9283	NaN	24.2552	25.7344	NaN	24.9444	NaN	NaN	24.5307	25.2936	23.565	24.6781	25.1109	24.6587	NaN	S	0.999947	1472	LSDMRSHVEDGDVAGSPAVPPAEQDPMKLKT	Rrbp1	Ribosome-binding protein 1	Q99PL5
NaN	21.0453	20.9406	21.0635	21.8241	21.4205	22.5322	21.9123	NaN	NaN	23.2943	22.9948	23.1824	23.1564	23.0533	NaN	NaN	NaN	NaN	NaN	21.7214	19.7779	22.4707	S	0.769322	155	KKKEKKVAKVEPAVSSIVNSIQVLASKSAIL	Rrbp1	Ribosome-binding protein 1	Q99PL5
NaN	NaN	NaN	NaN	NaN	NaN	NaN	NaN	22.3186	NaN	NaN	NaN	NaN	NaN	20.7074	21.6782	22.8667	21.9911	21.25	NaN	NaN	NaN	NaN	S	0.99044	159	KKVAKVEPAVSSIVNSIQVLASKSAILEATP	Rrbp1	Ribosome-binding protein 1	Q99PL5
22.8154	22.1901	NaN	22.9425	23.8172	22.9554	23.6955	23.4282	NaN	NaN	NaN	NaN	NaN	NaN	NaN	NaN	NaN	NaN	NaN	NaN	NaN	NaN	NaN	S	0.971437	806	VSSTLPVATQSPTPPSPLFSVDFRSDFSESV	Rc3h2	Roquin-2	P0C090
NaN	NaN	NaN	NaN	NaN	NaN	NaN	NaN	NaN	21.8362	22.8906	23.2853	22.8609	22.4415	22.4613	NaN	NaN	NaN	NaN	NaN	20.8936	23.5653	23.6716	S	0.999992	2	______________MSGGGEQPDILSVGILV	Ttbk2	Tau-tubulin kinase 2	Q3UVR3
NaN	NaN	NaN	NaN	NaN	NaN	NaN	NaN	24.916	23.7116	23.4176	24.0343	23.6705	23.5927	23.9069	23.3884	23.7019	22.062	23.3426	NaN	21.6464	23.1666	22.8973	S	1	355	RCFGLLLSPGKDVRNSDMHLLDLESMGKSSD	Rabgap1	Rab GTPase-activating protein 1	A2AWA9
NaN	NaN	NaN	NaN	NaN	NaN	NaN	NaN	NaN	NaN	NaN	21.2661	NaN	NaN	NaN	NaN	NaN	NaN	23.251	NaN	21.3646	21.5444	NaN	S	0.999991	987	NKEGRVKGISSAKGVSDEDTDEEKETLKNQL	Rabgap1	Rab GTPase-activating protein 1	A2AWA9
24.137	23.6681	24.012	24.2603	24.276	24.3117	24.9925	24.7012	NaN	NaN	24.3672	NaN	23.1009	NaN	23.6832	NaN	NaN	NaN	NaN	21.6244	21.7619	23.1721	22.686	S	1	42	LVSRQGDETPSTNNGSDDEKTGLKIVGNGSE	Rabgap1	Rab GTPase-activating protein 1	A2AWA9
NaN	NaN	NaN	NaN	NaN	NaN	NaN	NaN	NaN	NaN	NaN	22.5185	23.4349	22.4631	22.3377	22.6387	22.9215	NaN	23.9608	NaN	21.9563	NaN	23.1212	S	0.997276	486	CLESESERERRKTTASPSVRLPQSGSQSSMI	Rabgap1	Rab GTPase-activating protein 1	A2AWA9
NaN	NaN	NaN	NaN	NaN	NaN	NaN	NaN	23.056	NaN	23.2011	22.9831	23.1477	23.3153	23.2855	23.1128	22.0624	22.3224	23.4505	22.2322	22.7115	22.9146	21.9419	S	0.954281	910	IFWRKKRTDAKNNEVSFSQIKPKKSKLIRVE	Ptprj	Receptor-type tyrosine-protein phosphatase eta;Protein-tyrosine-phosphatase	Q64455
NaN	NaN	NaN	NaN	NaN	NaN	NaN	NaN	23.0722	23.0084	22.5914	22.5051	21.1207	22.4184	21.8202	21.5324	NaN	21.2748	22.0984	NaN	19.3347	22.8195	NaN	S	0.840338	1450	ERLHGGKGLPFYAGLSPSGKLVAYKRKPSST	Mga	MAX gene-associated protein	A2AWL7
NaN	NaN	NaN	NaN	NaN	NaN	NaN	NaN	NaN	NaN	22.7717	24.0182	23.8974	23.2068	24.3586	23.3433	24.0026	22.749	22.273	21.7386	22.1868	22.6245	24.4424	S	0.851925	287	KQRNSSDQEGNSVSSSPAHRVRLTEGEGSEI	Mga	MAX gene-associated protein	A2AWL7
23.4112	23.3545	23.0513	23.049	23.366	23.3122	23.8718	23.9596	24.566	23.7887	23.7159	23.6821	23.7874	23.6003	23.889	23.8428	23.8669	23.5538	24.6703	22.8425	23.1504	24.151	24.1164	S	0.999993	921	GRTKSSYKSILPYPVSPKQKNSHVSQGDKIT	Mga	MAX gene-associated protein	A2AWL7
NaN	NaN	NaN	NaN	NaN	NaN	NaN	NaN	NaN	NaN	NaN	NaN	NaN	NaN	NaN	21.7738	23.3713	22.5577	NaN	NaN	NaN	NaN	NaN	S	1	264	LKLRSRLKQKVAERRSSPLLRRKDGPVATAL;LKVRSRLKQKVAERRSSPLLRRKDGTVISTF	Hdac5;Hdac9;Zc3h12d;Hdac4	Histone deacetylase 5;Histone deacetylase;Histone deacetylase 9;Probable ribonuclease ZC3H12D;Histone deacetylase 4	Q6NZM9
25.1902	25.0845	25.0261	25.581	25.4051	25.6204	25.926	25.5089	26.9638	26.8033	26.3482	26.5771	26.4968	26.0607	27.3215	25.4509	26.7387	26.3201	26.9659	26.2275	26.4771	26.1556	27.0039	S	1	265	KLRSRLKQKVAERRSSPLLRRKDGPVATALK;KVRSRLKQKVAERRSSPLLRRKDGTVISTFK	Hdac5;Hdac9;Zc3h12d;Hdac4	Histone deacetylase 5;Histone deacetylase;Histone deacetylase 9;Probable ribonuclease ZC3H12D;Histone deacetylase 4	Q6NZM9
25.5822	25.1729	25.2153	25.8974	25.6744	26.1921	26.6674	26.7694	NaN	25.7996	25.4317	26.0965	26.0136	25.6514	26.4345	26.035	26.2917	26.4209	26.0448	25.7832	26.1219	26.2315	26.6535	S	0.999995	245	GMYDAKDDFPLRKTASEPNLKLRSRLKQKVA;GPYDSRDDFPLRKTASEPNLKVRSRLKQKVA	Hdac5;Hdac9;Hdac4	Histone deacetylase 5;Histone deacetylase;Histone deacetylase 9;Histone deacetylase 4	Q6NZM9
23.6861	23.2495	23.1596	23.4777	23.171	23.2137	21.099	24.0741	24.9879	NaN	22.397	24.658	23.6788	23.6782	24.9815	23.2255	24.6742	22.8632	24.3625	23.7241	23.3572	24.8094	23.3922	S	0.998893	650	LSLATVPHQALGRTQSSPAAPGSMKSPTDQP	Hdac5	Histone deacetylase 5;Histone deacetylase	Q9Z2V6
NaN	NaN	NaN	NaN	NaN	NaN	NaN	NaN	23.6996	23.3091	23.4038	24.0552	22.4917	23.5222	24.7011	22.6135	21.61	23.3972	NaN	NaN	NaN	23.9236	24.0403	S	0.976697	488	TVGKLPRHRPLSRTQSSPLPQSPQALQQLVM	Hdac5	Histone deacetylase 5;Histone deacetylase	Q9Z2V6
NaN	NaN	NaN	NaN	NaN	NaN	NaN	NaN	27.0501	28.3396	27.2296	27.8499	27.2455	26.1196	27.9305	27.6623	27.3937	27.3183	26.7261	25.4022	26.1426	26.1235	28.4378	S	1	484	RKPGGEREDRGKLPESPKRAEEIWQQSVIGD	Ubtf	Nucleolar transcription factor 1	P25976
NaN	NaN	NaN	NaN	NaN	NaN	NaN	NaN	NaN	23.3069	24.5411	25.3296	24.7926	24.4442	24.9727	23.5346	24.3736	NaN	25.3824	NaN	23.7178	25.0454	22.4083	S	1	904	GSPFDPVFEVEPKIPSDNLEEPVPKVIPEGA	Adnp	Activity-dependent neuroprotector homeobox protein	A2BDX0
NaN	NaN	NaN	NaN	NaN	NaN	NaN	NaN	27.0398	NaN	NaN	NaN	NaN	NaN	NaN	25.0367	26.3267	25.9479	25.8838	NaN	NaN	NaN	NaN	S	1	708	QNGQDKTNAPSRLNQSPGLAPVKRTYEQMEF	Adnp	Activity-dependent neuroprotector homeobox protein	A2BDX0
22.2925	21.9658	21.6992	23.0791	23.406	23.3856	24.1664	24.0471	25.3512	NaN	23.8572	24.3802	23.9345	23.2403	23.9567	24.8141	24.4786	24.5705	24.9108	23.4876	23.2859	24.8692	24.5745	S	1	98	SKFFSAYKSHFRNVHSEDFENRILLNCPYCT	Adnp		A2BDX0
22.5371	22.0384	22.654	23.4424	22.9801	24.0588	24.2743	24.1951	NaN	25.1537	22.9791	25.3531	24.7984	24.52	25.4013	24.4141	25.5802	24.2624	23.8685	22.8766	NaN	NaN	24.7765	S	0.92183	20	WRAWDGQSFKENQPESPSARGIVVSWLSRAE	Las1l	Ribosomal biogenesis protein LAS1L	A2BE28
NaN	NaN	NaN	NaN	NaN	NaN	NaN	NaN	NaN	NaN	23.3468	22.6276	NaN	22.8565	23.8667	21.8685	22.3204	23.4815	NaN	22.1892	22.487	NaN	NaN	S	0.972537	238	AVEDDANTKGNEEVASHPEPSSRHKELYEKA	Las1l	Ribosomal biogenesis protein LAS1L	A2BE28
NaN	NaN	NaN	NaN	NaN	NaN	NaN	NaN	NaN	23.1652	NaN	NaN	NaN	NaN	NaN	NaN	NaN	23.2446	NaN	NaN	NaN	NaN	NaN	S	1	13	___MCASPRPFRRVGSAGAAALAAGGAGGAE	Wdr34	WD repeat-containing protein 34	Q5U4F6
NaN	NaN	NaN	NaN	NaN	NaN	NaN	NaN	NaN	NaN	NaN	NaN	21.741	NaN	NaN	NaN	23.6938	21.8525	23.7404	NaN	NaN	NaN	NaN	S	0.983452	160	YFENKVLSKEFHLNESGDPSSKSTEIKWKSG	Set	Protein SET	Q9EQU5
NaN	NaN	24.5147	23.5469	23.3557	NaN	23.7497	NaN	NaN	NaN	22.6175	24.3809	24.3506	NaN	24.1379	NaN	NaN	NaN	NaN	NaN	NaN	NaN	NaN	S	1	62	IDEVQNEIDRLNEQASEEILKVEQKYNKLRQ	Set	Protein SET	Q9EQU5
28.8425	28.8094	29.1585	28.6715	29.2408	29.3826	30.1851	30.1476	28.9019	28.7549	28.5309	29.1323	28.6639	27.8453	29.3131	28.0801	28.8793	28.9198	28.6915	27.7765	28.2411	29.1039	29.5817	S	0.999998	30	KPRPAAAPKLEDKSASPGLPKGEKEQQEAIE	Set	Protein SET	Q9EQU5
NaN	NaN	NaN	NaN	NaN	NaN	21.3761	NaN	22.7824	NaN	23.8939	23.7292	23.8147	23.6101	22.5284	23.4354	22.2646	24.1937	NaN	22.3372	23.3269	24.308	22.2598	S	0.999889	45	ARARRGSGRRGAPQLSPESPLLSGARGCRED	Mlx	Max-like protein X	O08609
NaN	NaN	NaN	NaN	NaN	NaN	NaN	NaN	NaN	NaN	22.8761	21.6335	NaN	NaN	NaN	NaN	NaN	NaN	NaN	23.0994	NaN	NaN	NaN	S	0.905213	48	RRGSGRRGAPQLSPESPLLSGARGCREDSSH	Mlx	Max-like protein X	O08609
NaN	NaN	NaN	NaN	NaN	NaN	NaN	NaN	NaN	26.0829	26.2107	26.5099	24.9931	25.7141	25.455	25.3288	24.9239	26.3255	26.1015	25.3472	25.7564	25.9702	25.6889	S	1	51	ETDQKKEAAVSVQEESDLEKKRREAEALLQS	Dync1i2	Cytoplasmic dynein 1 intermediate chain 2	O88487
22.9052	23.1745	23.3794	23.109	23.6051	23.2231	23.3038	23.7515	25.544	23.9919	25.8815	25.7495	25.5161	NaN	25.7102	25.49	25.7251	24.0512	25.3889	23.6006	25.9203	24.7855	25.108	S	0.982265	81	SMGLTTDSPIVPPPMSPSSKSVSTPSEAGSQ	Dync1i2	Cytoplasmic dynein 1 intermediate chain 2	O88487
NaN	NaN	NaN	NaN	NaN	NaN	NaN	NaN	NaN	25.6254	23.6492	24.0102	24.2449	23.7706	NaN	24.5354	24.5004	23.6299	NaN	23.8455	24.1548	NaN	24.8284	S	0.992301	86	TDSPIVPPPMSPSSKSVSTPSEAGSQDSGDG	Dync1i2	Cytoplasmic dynein 1 intermediate chain 2	O88487
NaN	NaN	NaN	NaN	NaN	NaN	NaN	NaN	24.6718	25.1233	24.5497	24.9335	22.6252	NaN	23.8202	23.7847	23.7883	23.8061	23.8672	23.623	23.6569	21.7469	23.8474	S	0.885225	312	AAGSRTWHERDQDMSSPTTMKKPEKPLFSST	Nfib	Nuclear factor 1 B-type;Nuclear factor 1	P97863
NaN	NaN	NaN	NaN	NaN	NaN	NaN	NaN	NaN	NaN	27.3997	28.1073	28.336	27.6415	28.9898	28.7898	27.9402	27.9628	26.5503	28.0518	28.148	28.2091	29.1199	S	0.98858	328	PTTMKKPEKPLFSSTSPQDSSPRLSTFPQHH	Nfib	Nuclear factor 1 B-type;Nuclear factor 1	P97863
NaN	NaN	NaN	NaN	NaN	NaN	NaN	NaN	24.4725	NaN	26.8283	NaN	25.7389	25.9901	26.3009	26.2243	26.0288	25.7647	NaN	25.4013	26.1353	25.5763	25.9151	S	0.863524	332	KKPEKPLFSSTSPQDSSPRLSTFPQHHHPGI	Nfib	Nuclear factor 1 B-type;Nuclear factor 1	P97863
NaN	NaN	24.0767	NaN	NaN	NaN	NaN	NaN	NaN	NaN	NaN	26.4764	NaN	NaN	NaN	NaN	NaN	25.7704	NaN	NaN	NaN	NaN	26.0625	S	0.758262	333	KPEKPLFSSTSPQDSSPRLSTFPQHHHPGIP	Nfib	Nuclear factor 1 B-type;Nuclear factor 1	P97863
23.1003	23.3492	23.647	23.7567	23.6977	NaN	NaN	24.5644	25.4594	NaN	NaN	23.7771	22.3359	NaN	22.632	NaN	NaN	NaN	NaN	NaN	24.1163	24.8006	24.9518	S	0.97369	264	YYHDMNSGVNLQRSLSSPPSSKRPKTISIDE	Nfib	Nuclear factor 1 B-type;Nuclear factor 1	P97863
25.8005	25.5199	25.7614	25.5898	25.9228	26.8369	24.3026	24.5229	28.2766	28.001	27.8432	28.2407	27.2843	27.2975	27.7287	27.3151	27.4309	27.2776	NaN	27.465	26.9607	27.2876	27.6507	S	0.963189	312	DGKETKAADPPAENSSAPEAEQGGAE_____	Ybx1	Nuclease-sensitive element-binding protein 1	P62960
26.7525	25.8436	26.472	26.3372	26.1469	26.4382	26.1971	26.4212	26.0465	24.7867	25.9781	24.7619	24.5823	24.9742	24.3153	25.025	23.1451	23.8608	25.7342	22.3983	23.5875	23.7273	23.837	S	1	133	PVRQNMYRGYRPRFRSIHFRGPPRQRQPRED	Ybx1		A2BGG7
26.5989	26.3746	28.8603	27.5295	27.3383	27.5096	27.6497	28.2254	28.7267	30.611	30.0012	30.4474	29.6347	28.9819	30.1585	30.1376	30.1228	30.0806	28.9282	29.6486	30.1896	30.0732	30.6519	S	1	172	QQNYQNSESGEKNEGSESAPEGQAQQRRPYR	Ybx1	Nuclease-sensitive element-binding protein 1	P62960
26.7081	26.36	28.3993	27.0506	27.2873	27.1122	27.3509	27.7486	28.4356	29.8643	28.4625	29.9313	29.5534	28.9309	29.8708	29.7163	29.8914	29.5534	28.7444	29.5362	29.856	29.6856	29.8344	S	1	174	NYQNSESGEKNEGSESAPEGQAQQRRPYRRR	Ybx1	Nuclease-sensitive element-binding protein 1	P62960
26.3859	25.703	28.0056	26.3211	26.4009	26.7981	26.8542	26.9106	25.9833	27.3069	27.0581	27.9803	27.1899	26.6009	27.666	27.392	27.7263	27.6538	26.3762	26.8119	27.1339	27.6404	28.0721	S	0.997875	163	RRRGPPRNYQQNYQNSESGEKNEGSESAPEG	Ybx1	Nuclease-sensitive element-binding protein 1	P62960
NaN	NaN	NaN	NaN	NaN	NaN	NaN	NaN	26.7517	25.9205	26.0071	26.227	25.9314	25.2961	26.7274	26.1266	24.9867	24.3132	NaN	24.8748	25.5326	25.6482	25.8995	S	0.999249	207	PPYYMRRPYARRPQYSNPPVQGEVMEGADNQ	Ybx1	Nuclease-sensitive element-binding protein 1	P62960
NaN	NaN	NaN	NaN	NaN	NaN	NaN	NaN	NaN	24.0248	24.3687	24.3765	24.4068	NaN	24.0334	NaN	23.7629	23.5438	25.2188	23.2459	24.3498	24.0454	24.5306	S	0.990653	64	EDHTIEPLSRHNRATSFSSVRDESNARSPNA	Zfp185		G5E8W8
NaN	NaN	NaN	NaN	NaN	NaN	NaN	NaN	25.3242	26.116	25.5816	25.9412	25.6903	25.5201	25.9732	25.3893	25.6689	25.8595	25.6281	25.9541	25.6317	25.6682	25.568	S	0.977217	152	TEDYKKLAPYNIRRSSISGTEEEEVPFTPDE	Zfp185;Znf185	Zinc finger protein 185	G5E8W8
NaN	NaN	NaN	NaN	NaN	NaN	NaN	NaN	25.6921	NaN	25.3169	25.7426	24.59	24.815	25.7528	24.2082	25.6228	25.1431	25.8299	23.6427	25.3319	25.4491	24.7259	S	0.998131	505	FASSTRGQTLQSSIPSPDPKSYAERKLDSSV	Qser1		A2BIE1
NaN	NaN	NaN	NaN	NaN	NaN	NaN	NaN	NaN	NaN	20.4322	22.7658	22.5736	21.8517	25.0004	NaN	NaN	NaN	24.7734	NaN	NaN	NaN	NaN	S	1	166	RREEAGAGPRPERRQSAGPPAGRPEPGPRCL	Zxdb	Zinc finger X-linked protein ZXDB	A2CE44
24.5838	24.2454	23.7578	23.6128	25.2117	24.9897	25.2368	25.7565	27.1267	26.6621	26.5228	27.0257	26.3769	25.1931	25.9228	25.8241	25.6555	25.5212	25.0202	24.4139	24.7971	25.0894	25.2953	S	1	105	IRLQIWDTAGQERFNSITSAYYRSAKGIILV	Rab12	Ras-related protein Rab-12	P35283
NaN	NaN	NaN	NaN	NaN	NaN	NaN	NaN	NaN	NaN	24.8856	23.4065	24.7095	22.792	24.5208	23.8037	24.7632	23.7216	25.748	23.0678	NaN	21.2518	NaN	S	0.84401	219	LKKMPLDVLRNELSNSILSLQPEPEIPPELP	Rab12	Ras-related protein Rab-12	P35283
NaN	NaN	NaN	NaN	NaN	NaN	NaN	NaN	26.5145	26.0765	25.7238	24.6313	24.8393	25.3319	25.3269	24.9816	25.2674	NaN	25.0481	25.1958	25.0668	24.664	25.533	S	0.999995	15	_MDPSAALHRRPAGGSLGAVSPALSGGQARR	Rab12	Ras-related protein Rab-12	P35283
27.0639	26.7863	27.64	27.5303	27.7237	27.4812	27.923	27.9145	NaN	29.6082	28.4221	29.83	28.6868	28.565	29.319	28.7209	28.8862	27.7913	29.017	29.1657	28.8655	28.6438	28.9712	S	0.999992	20	AALHRRPAGGSLGAVSPALSGGQARRRKQPP	Rab12	Ras-related protein Rab-12	P35283
NaN	NaN	NaN	NaN	NaN	NaN	NaN	NaN	NaN	NaN	NaN	NaN	NaN	NaN	NaN	24.5125	NaN	NaN	NaN	NaN	NaN	NaN	NaN	S	0.99863	24	RRPAGGSLGAVSPALSGGQARRRKQPPRPAD	Rab12	Ras-related protein Rab-12	P35283
22.5165	22.6103	21.6581	NaN	22.7025	NaN	21.7802	22.3573	24.9321	24.504	24.213	23.1755	24.3997	NaN	24.3592	23.8438	23.772	23.7444	23.563	22.3305	22.0088	NaN	24.1126	S	1	2208	AQILESQRDFLNALQSPIEYQRRESQTNSLG;NQVLETQRDFLNALQSPIEYQRKERSTAVIR	Kalrn;Arhgef25	Kalirin;Rho guanine nucleotide exchange factor 25	A2CG49
NaN	NaN	NaN	NaN	NaN	NaN	NaN	NaN	24.8044	24.6792	NaN	NaN	24.4625	NaN	25.2571	25.0665	23.9624	25.1223	24.7559	23.0286	NaN	NaN	23.826	S	0.999998	1771	DGNIKKQKKVRDGRKSFDLGSPKPGDETTPQ	Kalrn	Kalirin	A2CG49
23.5594	23.4499	23.3514	23.9028	24.2559	23.2922	23.4138	24.6734	24.3637	22.9955	23.4624	24.1823	23.0296	23.0881	23.77	23.1657	23.2664	21.8679	23.4816	22.0236	22.1673	NaN	NaN	S	0.996543	1779	PGPKRPGNTLRKWLTSPVRRLSSGKADGHAK;PGPKRSTNTLKKWLTSPVRRLNSGKADGNIK	Kalrn;Trio	Kalirin;Triple functional domain protein	Q0KL02
NaN	NaN	NaN	NaN	NaN	NaN	NaN	NaN	NaN	23.2411	21.8383	23.7087	23.3507	NaN	23.0452	23.7845	23.1262	23.4705	24.5624	22.378	23.3379	24.4293	23.9974	S	0.995774	656	IKNKLDKEKDRDEKYSPKNCKLRRLSKSPFQ	Arid4b	AT-rich interactive domain-containing protein 4B	A2CG63
NaN	NaN	NaN	NaN	NaN	NaN	NaN	NaN	NaN	26.1647	25.2076	25.7443	24.3794	24.2563	25.5256	25.7675	25.2585	23.6195	23.9552	23.2505	NaN	24.8543	NaN	S	0.955648	756	STHSRNELISKEEQSSPSLLEENKVHTDLVI	Arid4b	AT-rich interactive domain-containing protein 4B	A2CG63
NaN	NaN	NaN	NaN	NaN	NaN	NaN	NaN	NaN	25.1519	23.169	25.42	NaN	24.9776	24.7616	23.981	24.2047	25.4549	NaN	22.9349	NaN	25.034	25.5747	S	0.936854	1155	ATVVNNKKKGKGTNSSDSEELSAGESVTKTQ	Arid4b	AT-rich interactive domain-containing protein 4B	A2CG63
NaN	NaN	NaN	NaN	NaN	NaN	NaN	NaN	25.3555	25.8268	25.5996	25.808	25.7211	24.952	25.4656	25.7473	25.5145	25.3244	25.0723	24.7472	24.8573	23.8361	25.9675	S	1	482	SLGSKKSLLECIPAQSDEEKEAHITKLEENE	Arid4b	AT-rich interactive domain-containing protein 4B	A2CG63
NaN	NaN	NaN	NaN	NaN	NaN	NaN	NaN	24.1773	NaN	22.9329	22.5318	21.6398	NaN	23.9757	NaN	22.3024	22.6329	23.689	NaN	NaN	21.8848	23.4371	S	0.979853	675	CKLRRLSKSPFQSNPSPEMVSKLDLADAKNS	Arid4b	AT-rich interactive domain-containing protein 4B	A2CG63
21.8416	21.3926	21.5919	22.3239	22.5594	21.8148	22.4227	22.8858	NaN	23.012	24.4164	26.6694	26.7804	26.7492	25.1142	26.5664	25.7842	27.2727	27.8254	27.2893	26.3563	25.9382	26.9383	S	0.999985	778	NKVHTDLVIAKTVSKSPERLRKDMEAISEDT	Arid4b	AT-rich interactive domain-containing protein 4B	A2CG63
NaN	NaN	NaN	NaN	NaN	NaN	NaN	NaN	NaN	25.5825	24.8178	24.3893	NaN	NaN	NaN	NaN	NaN	20.7991	NaN	24.1709	25.2642	23.7278	NaN	S	0.972913	431	PCKDCENKEVKVKEESETEIKEVNVEDSKNV	Arid4b	AT-rich interactive domain-containing protein 4B	A2CG63
NaN	NaN	NaN	NaN	NaN	NaN	NaN	NaN	23.758	25.6781	25.7642	25.9897	25.5409	25.3487	26.2299	24.7054	26.1722	NaN	NaN	24.6399	25.4748	24.7008	NaN	S	0.976921	839	GKRRYCSADECLQTGSPGKKEDRTKSKEPLC	Arid4b	AT-rich interactive domain-containing protein 4B	A2CG63
NaN	NaN	NaN	NaN	NaN	NaN	NaN	NaN	25.5281	25.7044	25.6475	25.9471	25.5548	25.1094	25.8058	25.424	25.7646	25.434	25.1372	24.1805	25.1774	25.5175	25.8199	S	0.998197	285	LGKVTSDVAKRRKLNSGSLSEDLGSAGGSGD	Ehmt2	Histone-lysine N-methyltransferase EHMT2	Q9Z148
NaN	NaN	NaN	NaN	NaN	NaN	NaN	NaN	NaN	NaN	26.3921	25.1621	26.2058	23.6717	26.6707	25.8103	25.7213	25.9283	NaN	NaN	22.5815	21.0449	26.2804	S	0.947028	287	KVTSDVAKRRKLNSGSLSEDLGSAGGSGDII	Ehmt2	Histone-lysine N-methyltransferase EHMT2	Q9Z148
NaN	NaN	NaN	NaN	NaN	NaN	NaN	NaN	NaN	23.5683	24.2536	23.2045	23.303	NaN	21.9303	23.9105	23.1777	23.3828	NaN	23.3928	22.9371	23.8415	NaN	S	0.986304	193	ACPSRAKMSMTGAGKSPPSVQSLAMRLLSMP	Ehmt2	Histone-lysine N-methyltransferase EHMT2	Q9Z148
NaN	NaN	NaN	NaN	NaN	NaN	NaN	NaN	23.49	NaN	NaN	22.5101	21.4749	NaN	NaN	NaN	22.0628	NaN	NaN	21.0588	NaN	NaN	NaN	S	0.854576	96	LLLEKEPRGAAERVHSSLGDTPQSEETLPKA	Ehmt2	Histone-lysine N-methyltransferase EHMT2	Q9Z148
25.7065	25.1583	25.7398	26.3525	25.5945	25.9867	26.8034	27.1903	24.6925	24.8389	24.708	26.9778	NaN	22.4914	26.3617	25.4062	25.6941	NaN	27.729	26.0673	26.1417	25.7747	26.0124	S	0.996397	418	LKQAMKDRNLGSPPKSPTHASPQHTQTEKDS	Uhrf1bp1l	UHRF1-binding protein 1-like	A2RSJ4
NaN	NaN	NaN	NaN	NaN	NaN	NaN	NaN	NaN	NaN	NaN	NaN	21.6223	NaN	23.4375	NaN	22.9385	NaN	NaN	NaN	NaN	NaN	22.4069	S	0.999615	1092	SQTSLSAKSKERCPPSPAPLSVSYKNMKRSA	Uhrf1bp1l	UHRF1-binding protein 1-like	A2RSJ4
NaN	NaN	NaN	NaN	NaN	NaN	NaN	NaN	NaN	23.8703	24.302	23.4466	23.2741	23.8849	23.2078	23.7721	23.6523	22.9977	NaN	NaN	21.1705	23.3152	23.1097	S	0.868314	1400	CDVRMHSSVTQATQTSPEVPLPSQSANFLDI	Uhrf1bp1l	UHRF1-binding protein 1-like	A2RSJ4
NaN	NaN	NaN	NaN	NaN	NaN	NaN	NaN	23.4831	24.0889	21.4486	24.0987	21.7306	23.1244	23.0784	NaN	23.3144	23.2052	22.5211	21.1575	22.3589	21.8682	24.4327	S	0.998853	952	LSHAPLKDPLLFKSASDTNLQKGTSFLDYLS	Uhrf1bp1l	UHRF1-binding protein 1-like	A2RSJ4
24.1038	23.8796	23.864	24.0762	24.0407	23.9681	24.6065	24.329	NaN	NaN	22.9087	22.3429	NaN	24.1073	21.7241	NaN	NaN	NaN	23.4717	21.743	21.2703	22.8494	NaN	S	0.999985	934	IRNATLNHMSDNRSMSVDLSHAPLKDPLLFK	Uhrf1bp1l	UHRF1-binding protein 1-like	A2RSJ4
NaN	NaN	NaN	NaN	NaN	NaN	NaN	NaN	NaN	26.5538	25.1214	25.1924	24.2549	24.932	22.8759	24.7077	24.3795	24.8256	22.1934	24.328	23.7145	24.0542	24.6711	S	0.987806	1076	RTPPQQKSPTTTRRLSITSLTGKPAKPNAGQ	Dennd5b	DENN domain-containing protein 5B	A2RSQ0
24.8813	NaN	24.9957	25.7614	25.6319	25.7884	26.2584	26.5238	27.0594	27.6623	26.7307	26.7061	25.6246	26.1139	26.748	26.5991	26.7666	26.7271	27.1906	26.434	26.6244	26.6877	26.7969	S	1	247	DDRFGQIMIENLRRRSCDLAGVETCKSLESQ	Lcmt1		A2RTH5
NaN	NaN	NaN	NaN	NaN	NaN	NaN	NaN	NaN	24.4791	NaN	23.7895	22.428	NaN	NaN	NaN	NaN	NaN	NaN	NaN	NaN	NaN	NaN	S	0.973115	2689	EPGSDQNCTESSATVSPEREHVAQAREEGLK	Chd6	Chromodomain-helicase-DNA-binding protein 6	A3KFM7
NaN	NaN	NaN	NaN	NaN	NaN	NaN	NaN	23.5896	NaN	22.2784	24.3866	23.8153	23.0285	23.8896	23.9938	22.705	23.7232	23.7039	22.1488	22.4011	24.0963	24.3082	S	0.997004	1357	DSAEDKLDGLQKQTASPSDGSDGIFGEKKDD	Chd6	Chromodomain-helicase-DNA-binding protein 6	A3KFM7
23.3461	22.9261	NaN	NaN	23.6388	23.6176	23.4079	24.1648	NaN	24.1065	24.2138	23.4909	23.0823	24.1742	23.0743	22.4478	NaN	22.7983	NaN	NaN	NaN	NaN	NaN	S	0.98392	784	KVSDFGLSRFLEDDTSDPTYTSALGGKIPIR	Ephb2	Ephrin type-B receptor 2;Receptor protein-tyrosine kinase	P54763
NaN	NaN	NaN	NaN	NaN	NaN	NaN	NaN	NaN	NaN	NaN	NaN	NaN	NaN	NaN	NaN	NaN	21.6983	NaN	22.2011	19.58	21.1334	NaN	S	0.999977	948	SQLQVSKPADEKETESGRNSPEKGKGKIDIQ	Tbc1d8b	TBC1 domain family member 8B	A3KGB4
22.8062	NaN	NaN	21.7256	21.0569	21.891	22.1872	NaN	NaN	NaN	26.626	NaN	NaN	20.7817	27.3693	28.2956	NaN	21.778	NaN	22.2011	19.58	29.2352	NaN	S	1	952	VSKPADEKETESGRNSPEKGKGKIDIQAYLS	Tbc1d8b	TBC1 domain family member 8B	A3KGB4
23.6703	23.0128	24.2139	24.4904	24.8518	25.4215	25.6202	25.8902	26.4845	26.3716	24.7363	26.9563	26.4404	25.5815	26.4726	25.9563	26.3915	26.4824	26.4765	26.0446	26.9079	26.5622	26.5379	S	0.999939	1034	TNLLLRMEEVGRKLHSPASSASTARDSGPSE	Tbc1d8b	TBC1 domain family member 8B	A3KGB4
NaN	NaN	NaN	NaN	NaN	NaN	NaN	NaN	23.9894	24.7632	NaN	23.7763	NaN	23.4174	24.3894	23.1601	NaN	NaN	24.173	NaN	NaN	NaN	23.3173	S	0.999982	138	GEKRVVSRNWARAPLSPGVTTTLTDDEDAAD		Uncharacterized protein C15orf52 homolog	A3KGF9
NaN	NaN	NaN	NaN	NaN	NaN	NaN	NaN	NaN	25.8487	24.3481	24.5789	23.589	NaN	23.687	NaN	NaN	NaN	NaN	22.523	22.2618	NaN	24.7342	S	0.998994	404	PDRQETVPATSPIPASPEGLKGESGTSTASL		Uncharacterized protein C15orf52 homolog	A3KGF9
23.3316	22.9836	24.0442	NaN	23.3471	23.248	23.8359	NaN	24.8581	26.4124	25.4595	26.5489	26.329	NaN	25.4341	26.3343	NaN	NaN	25.0826	24.6696	25.8616	26.0523	NaN	S	0.994022	423	LKGESGTSTASLAPDSPQHSDLAPLDLSVGG		Uncharacterized protein C15orf52 homolog	A3KGF9
NaN	NaN	NaN	NaN	NaN	NaN	NaN	NaN	25.1171	NaN	NaN	NaN	23.0415	NaN	24.74	24.4781	25.0575	24.5116	23.479	NaN	NaN	NaN	23.1426	S	0.991021	190	KAKRIVSEKPTTQARSPRAKGTSGGGRSWRA		Uncharacterized protein C15orf52 homolog	A3KGF9
25.943	25.5537	25.7465	25.6136	26.1299	26.1333	26.4341	26.2603	24.0973	NaN	25.512	25.8844	25.1339	25.8275	25.6406	25.2881	21.6447	25.4704	25.9101	24.16	24.1919	25.7465	25.1891	S	0.999998	46	YSQRWKRTQRHGRSHSLPNSLDYAQASERGR	Rmdn3	Regulator of microtubule dynamics protein 3	Q3UJU9
NaN	NaN	NaN	NaN	NaN	NaN	NaN	NaN	NaN	25.2599	25.1107	25.2178	24.5412	25.0201	24.7828	NaN	NaN	NaN	NaN	22.9831	24.1248	23.4365	NaN	S	0.998828	794	EINRSHTTPLECKIISPSDITPGDLDKTMMS	Casc5	Protein CASC5	A3KGI3
23.6419	23.433	24.0252	24.6678	24.4584	24.3192	24.1877	25.0221	NaN	NaN	NaN	NaN	NaN	24.2928	23.5594	24.6878	24.5022	24.274	NaN	NaN	23.4476	25.0527	23.591	S	0.999969	60	QEPNPPRKRKSSRRVSFADTIKVFQTESHMK	Casc5	Protein CASC5	A3KGI3
NaN	NaN	NaN	NaN	NaN	NaN	NaN	NaN	25.8989	26.7255	26.4804	24.3631	25.6979	24.6049	23.9136	25.6115	23.5907	24.3109	26.1693	NaN	23.0226	22.2405	25.0918	S	1	29	KTKVKDEPQRRSARLSAKPAPPKPEPKPKKA	Hmgn2;Gm16494;Gm6594	Non-histone chromosomal protein HMG-17	P09602
NaN	NaN	24.3503	NaN	22.2959	24.9313	25.7006	25.2176	25.8378	26.3029	26.2068	26.1362	26.169	25.88	26.0665	25.7842	25.1462	26.1543	25.8403	25.7887	25.7512	25.9056	26.1846	S	0.99991	64	RQGDMLRAFHAALRNSPINTKNQAVKERAQG	Arpc5l	Actin-related protein 2/3 complex subunit 5-like protein;Actin-related protein 2/3 complex subunit 5	Q9D898
22.722	22.7862	22.579	23.0242	24.0862	23.9364	24.001	24.4457	NaN	NaN	NaN	NaN	NaN	NaN	NaN	NaN	NaN	NaN	NaN	NaN	NaN	NaN	NaN	S	0.970271	368	LPHTPRLTHFPTVSGSPASLADSMQQKLAGP	Hm13;H13	Minor histocompatibility antigen H13	Q9D8V0-4
NaN	NaN	NaN	NaN	21.3222	NaN	22.182	22.5198	NaN	NaN	NaN	NaN	NaN	NaN	NaN	NaN	NaN	NaN	NaN	NaN	NaN	NaN	NaN	S	0.961194	1393	FEQFGQQLLAHGHYASPEIKEKLDILDQERT	Sptan1	Spectrin alpha chain, non-erythrocytic 1	P16546-2
22.7364	23.3636	23.1921	23.6832	22.736	22.9087	23.555	23.765	NaN	24.1592	21.3871	21.978	24.3284	NaN	24.0215	24.1042	24.3154	24.4204	NaN	24.4725	25.2879	24.2771	25.7814	S	0.998055	1741	FQKIKSMATSRRAKLSESHRLHQFFRDMDDE	Sptan1	Spectrin alpha chain, non-erythrocytic 1	P16546-2
NaN	NaN	NaN	NaN	NaN	NaN	NaN	NaN	23.8012	NaN	NaN	NaN	NaN	NaN	21.4989	NaN	NaN	NaN	23.6107	NaN	NaN	22.9037	NaN	S	0.995379	1271	EGFERDLAALGDKVNSLGETAQRLIQSHPES	Sptan1	Spectrin alpha chain, non-erythrocytic 1	P16546-2
NaN	NaN	NaN	NaN	NaN	NaN	NaN	NaN	NaN	22.0009	22.3246	21.0757	NaN	NaN	22.8831	NaN	NaN	NaN	22.9997	21.2013	NaN	20.4514	NaN	S	0.933908	1459	REAFLNTEDKGDSLDSVEALIKKHEDFDKAI	Sptan1	Spectrin alpha chain, non-erythrocytic 1	P16546-2
23.0342	NaN	23.3177	22.8709	23.1176	NaN	NaN	23.0927	NaN	NaN	NaN	NaN	NaN	NaN	NaN	NaN	NaN	NaN	NaN	NaN	NaN	NaN	NaN	S	0.999998	982	TGKELVLALYDYQEKSPREVTMKKGDILTLL	Sptan1	Spectrin alpha chain, non-erythrocytic 1	P16546-2
NaN	NaN	NaN	NaN	NaN	NaN	NaN	NaN	23.0534	NaN	NaN	23.0058	22.1633	23.243	21.8208	NaN	NaN	NaN	NaN	21.5685	22.6872	NaN	NaN	S	0.950858	1343	FRDLMSWINGIRGLVSSDELAKDVTGAEALL	Sptan1	Spectrin alpha chain, non-erythrocytic 1	P16546-2
27.0508	28.5357	28.3499	27.9884	27.4002	27.5336	27.581	28.1086	24.7038	24.7351	27.3678	27.9244	27.928	NaN	27.0628	27.5301	27.0878	26.6723	28.7284	25.8312	26.5637	26.7373	26.686	S	0.995002	1031	VPAAYVKKLDPAQSASRENLLEEQGSIALRQ	Sptan1	Spectrin alpha chain, non-erythrocytic 1	P16546-2
NaN	NaN	23.7207	23.5972	23.9547	NaN	23.61	24.3885	25.8326	24.9145	24.7951	24.8437	24.6806	24.797	24.9223	24.6727	25.0869	25.0581	24.4241	23.5926	23.5138	24.9577	23.5617	S	0.999881	1530	RLKAQMIEKRSKLGESQTLQQFSRDVDEIEA	Sptan1	Spectrin alpha chain, non-erythrocytic 1	P16546-2
22.2933	23.7116	24.0637	22.9925	23.4953	23.4405	23.5362	23.94	25.0972	22.0155	24.5457	24.213	24.5612	22.0693	25.1544	23.7081	22.539	24.5081	24.1629	23.7498	23.7135	22.5628	23.8526	S	1	1197	VATFNSIKELNERWRSLQQLAEERSQLLGSA	Sptan1	Spectrin alpha chain, non-erythrocytic 1	P16546-2
NaN	NaN	NaN	NaN	NaN	NaN	NaN	NaN	23.7482	NaN	NaN	24.3511	24.3231	23.3038	24.8492	24.3191	24.6727	24.3922	NaN	23.1832	22.1331	23.403	23.9827	S	0.99996	382	EPSRFPFPTKDPLHVSPATQSQKQYDTPSKT	Aff1	AF4/FMR2 family member 1	A3KMF4
NaN	NaN	NaN	NaN	NaN	NaN	NaN	NaN	NaN	24.7994	22.9418	NaN	NaN	NaN	NaN	NaN	NaN	NaN	NaN	NaN	NaN	NaN	NaN	S	0.969284	191	SAPERKLSPLISSLPSPVPPLSPVHSRLQGT	Aff1	AF4/FMR2 family member 1	A3KMF4
23.777	23.4727	24.1759	23.3985	23.6478	23.8468	24.1136	NaN	24.4675	NaN	23.198	23.32	24.5986	24.7038	24.8783	24.6749	25.1691	24.5808	24.7911	23.425	24.2866	23.3692	25.0008	S	0.922353	197	LSPLISSLPSPVPPLSPVHSRLQGTSKAHSS	Aff1	AF4/FMR2 family member 1	A3KMF4
23.6416	23.5942	24.0976	24.3275	24.1715	24.1664	24.5476	24.7388	24.6233	24.175	24.6303	24.878	24.7715	24.7796	25.1429	24.7111	24.7025	24.341	24.7096	23.2445	24.2422	21.2081	25.0876	S	0.999981	756	CKDKLLLPLRDTKLLSPLRDSPPPTSLVVKI	Aff1	AF4/FMR2 family member 1	A3KMF4
NaN	NaN	NaN	NaN	NaN	NaN	NaN	NaN	NaN	22.1012	22.1966	23.1266	23.2697	22.7867	NaN	NaN	NaN	22.0617	23.8846	21.3561	NaN	NaN	23.0715	S	0.98765	761	LLPLRDTKLLSPLRDSPPPTSLVVKITLDLL	Aff1	AF4/FMR2 family member 1	A3KMF4
23.2683	23.0791	23.0037	24.2692	24.8387	24.7179	25.2825	25.4892	25.2745	NaN	23.1477	23.4373	22.7072	23.0291	22.775	NaN	NaN	NaN	24.4729	23.1675	24.2836	22.4043	NaN	S	1	575	GPSEGPQPGKRGCPKSPAQQEPPPRQTVGSK	Aff1		A3KMF4
22.6414	22.7339	22.9698	23.7475	23.1492	23.4955	23.7285	23.1725	NaN	NaN	NaN	NaN	NaN	NaN	NaN	NaN	NaN	NaN	NaN	NaN	NaN	NaN	NaN	S	1	111	QFHHRELRESQFHQASRDVGYPNRDGAYQNR	Iqsec2	IQ motif and SEC7 domain-containing protein 2	Q5DU25
NaN	NaN	NaN	NaN	NaN	NaN	NaN	NaN	NaN	24.6955	22.6379	23.2738	20.8847	NaN	21.7638	21.1846	NaN	NaN	NaN	23.5207	22.9183	22.7972	22.452	S	0.767953	731	ATGLCKQTYQRETRHSWDSPAFNNDVVQRRH	Iqsec2	IQ motif and SEC7 domain-containing protein 2	Q5DU25
22.499	22.4001	22.1232	22.6165	22.1534	22.3904	22.4915	NaN	NaN	NaN	NaN	NaN	NaN	NaN	NaN	NaN	NaN	NaN	NaN	NaN	NaN	NaN	NaN	S	0.999986	383	RMSRRIILSNMRMQFSFEEYEKAQNPAYFEG	Iqsec2	IQ motif and SEC7 domain-containing protein 2	Q5DU25
22.8615	22.3277	NaN	22.8875	NaN	23.4815	23.2285	23.0654	26.2073	NaN	24.4569	26.1359	24.5069	25.1876	25.4938	24.972	26.1056	24.0958	25.6733	25.1009	25.3743	26.0323	23.6224	S	0.999082	870	ADETKLNTVDDQRAGSPSRDVGPSLGLKKSS	Pard3	Partitioning defective 3 homolog	A5D6P2
NaN	NaN	NaN	NaN	NaN	NaN	NaN	NaN	NaN	23.0314	NaN	21.4765	21.2969	21.1901	21.0603	NaN	20.3807	21.0388	NaN	NaN	NaN	NaN	23.0905	S	0.999679	201	GSPKTCDRKKDENYRSLPRDPSSWSNQFQRD	Pard3	Partitioning defective 3 homolog	B7ZNY3
NaN	NaN	NaN	NaN	NaN	NaN	NaN	NaN	26.2511	25.2193	25.5846	25.3312	24.7575	24.0973	24.694	25.5803	24.4423	25.6013	25.2866	24.5969	24.7037	24.6677	25.8383	S	0.832491	221	PSSWSNQFQRDNARSSLSASHPMVDRWLEKQ	Pard3	Partitioning defective 3 homolog	B7ZNY3
26.2166	26.158	26.3079	26.821	26.2728	26.7087	26.8464	27.1506	28.1163	26.2082	26.9324	27.6777	26.7586	26.581	27.767	26.8901	27.6287	26.8528	27.9749	27.4457	27.7357	27.5889	27.3546	S	0.999967	824	VDPVLAFQREGFGRQSMSEKRTKQFSDASQL	Pard3	Partitioning defective 3 homolog	B7ZNY3
NaN	NaN	NaN	NaN	NaN	NaN	NaN	NaN	NaN	NaN	NaN	23.2731	22.4283	24.2076	23.0372	NaN	21.896	NaN	NaN	NaN	NaN	NaN	22.1488	S	0.898681	955	SGRESVSTSSDQPSYSLERQMNGDPEKRDKT	Pard3	Partitioning defective 3 homolog	B7ZNY3
24.7237	24.2301	24.7948	24.2901	24.8518	24.5902	NaN	25.305	26.3824	25.5002	25.9453	26.963	26.7083	26.5161	27.8417	26.2593	27.9085	27.7036	27.3461	26.6007	26.7136	27.9522	27.4383	S	1	906	HRPRPHMVRGRGCNESFRAAIDKSYDGPEEA;HRPRPRIIRGRGCNESFRAAIDKSYDKPMVD	Pard3;Pard3b	Partitioning defective 3 homolog;Partitioning defective 3 homolog B	B7ZNY3
NaN	NaN	NaN	NaN	NaN	NaN	NaN	NaN	25.5892	24.0256	22.4541	25.6558	24.8675	22.923	24.8214	25.0265	25.6825	25.3649	25.1465	24.0812	25.7529	26.0221	25.1108	S	0.994384	1298	PADGVRGPFRQDVPPSPSQVARLNRLQTPEK	Pard3	Partitioning defective 3 homolog	B7ZNY3
22.6068	NaN	23.4206	23.4256	23.8486	23.1653	23.6972	23.9444	26.4867	26.0113	25.8324	25.261	25.3394	25.8339	26.0301	26.0325	25.6269	26.1312	26.8358	25.8776	26.2581	26.1808	25.8913	S	0.999825	1028	KDDKMEKMGRIKIQDSFTSEEDRVRMKEEQE	Pard3	Partitioning defective 3 homolog	B7ZNY3
NaN	NaN	NaN	NaN	NaN	NaN	NaN	NaN	27.16	26.5663	26.8735	26.9696	25.769	25.6135	27.3207	26.8247	26.3462	26.1825	26.6602	24.5238	26.0356	25.9594	27.0668	S	0.98856	728	RISHSLYSGIEGLDESPTRNAALSRIMGKCQ	Pard3	Partitioning defective 3 homolog	B7ZNY3
23.4811	23.9763	23.4656	23.9794	23.9834	23.4957	23.8203	24.5258	25.8286	25.5561	25.4525	24.9722	24.3263	24.7476	25.249	24.5317	23.891	23.6323	24.3537	23.4937	22.9999	23.1867	24.6724	S	0.995846	174	NFSSEEPSRKNPTRWSTTAGFLKQNTAGSPK	Pard3	Partitioning defective 3 homolog	B7ZNY3
NaN	NaN	NaN	NaN	NaN	NaN	NaN	NaN	28.1768	27.5162	26.9649	NaN	25.1974	27.4195	26.1997	24.4293	24.5417	NaN	NaN	NaN	NaN	23.1019	25.7552	S	0.999998	378	KEQYEQLSQREKNNYSPGRFSPDSHCVANRS	Pard3	Partitioning defective 3 homolog	B7ZNY3
NaN	NaN	25.1516	24.9262	25.0901	25.2657	25.4869	25.7181	28.3746	27.3237	26.2839	28.0334	27.3642	27.1376	27.7891	27.5817	27.8919	27.9652	NaN	25.8662	27.2772	26.3877	27.5337	S	0.999559	383	QLSQREKNNYSPGRFSPDSHCVANRSVANNA	Pard3	Partitioning defective 3 homolog	B7ZNY3
NaN	NaN	NaN	NaN	NaN	NaN	NaN	NaN	24.4272	NaN	NaN	24.0041	24.5698	NaN	24.8719	24.1815	24.039	24.6844	25.3209	NaN	NaN	NaN	25.0451	S	1	1193	SVEVQVQRQRQEERESFQQAQRQYSSLPRQS	Pard3	Partitioning defective 3 homolog	B7ZNY3
NaN	NaN	NaN	NaN	NaN	NaN	NaN	NaN	26.2813	26.3764	26.941	27.566	27.1821	26.6826	27.2297	26.8664	27.2384	27.264	26.6315	26.057	25.0576	26.8824	27.3868	S	0.948194	144	PSVLRANMPLHVRRSSDPALTGLSTSVSDNN	Pard3	Partitioning defective 3 homolog	B7ZNY3
NaN	NaN	NaN	NaN	NaN	NaN	NaN	NaN	20.7421	NaN	21.9157	NaN	21.1121	NaN	NaN	21.6563	21.4794	21.3851	NaN	NaN	NaN	NaN	23.748	S	0.999998	849	SDASQLDFVKTRKSKSMDLGIADETKLNTVD	Pard3		A5D6P2
22.6431	22.7574	22.79	23.357	22.9568	23.4966	23.4423	23.5117	26.1843	26.2092	25.975	26.16	26.0081	25.2442	25.7788	25.8569	24.5156	25.4872	NaN	24.5928	24.6171	25.5042	26.1434	S	0.999901	695	VARRISRCNELRSPGSPAAPELPIETELDDR	Pard3	Partitioning defective 3 homolog	B7ZNY3
23.4055	22.9142	23.2016	23.7894	24.0544	23.7433	24.5565	24.9134	24.6807	23.6475	22.772	NaN	NaN	NaN	24.0387	23.6544	24.2562	23.8504	NaN	NaN	NaN	22.8622	24.155	S	0.999106	1241	PGEGFQSAKENPRYSSYQGSRNGYLGGHGFN	Pard3	Partitioning defective 3 homolog	B7ZNY3
NaN	NaN	NaN	NaN	NaN	NaN	NaN	NaN	NaN	22.4078	21.5078	NaN	20.3138	NaN	NaN	NaN	19.959	NaN	NaN	20.952	NaN	20.0567	21.1126	S	0.998733	926	VTVAYSPKRSPKENLSPGFSHLLSKNESSPV	Mphosph9	M-phase phosphoprotein 9	E9QPF8
27.4379	26.9552	27.2211	27.8952	27.4112	27.9941	28.2691	28.218	29.284	28.988	28.9433	29.2241	28.809	28.7109	28.5074	29.2648	29.075	29.0532	29.2248	28.5518	28.9437	27.9489	29.0718	S	1	1201	KRAHSPEKKGPVREVSPAPATQGESRQDGDH	Phrf1	PHD and RING finger domain-containing protein 1	A6H619
NaN	NaN	NaN	NaN	NaN	NaN	NaN	NaN	NaN	26.9543	25.93	NaN	26.0676	26.8564	NaN	26.2355	27.2896	25.6907	26.8203	NaN	25.5318	26.764	26.3129	S	0.854743	919	SGMLELLSKGSAEGTSDLEQEGLGEIEPTEI	Phrf1	PHD and RING finger domain-containing protein 1	A6H619
NaN	NaN	NaN	NaN	NaN	NaN	NaN	NaN	NaN	NaN	22.7882	24.3531	23.7387	NaN	22.9561	22.9068	22.9366	NaN	NaN	NaN	21.1149	22.1099	NaN	S	0.944149	102	AIETQGKLEASSVPNSDDDAESCPICLNAFR	Phrf1	PHD and RING finger domain-containing protein 1	A6H619
22.4816	22.7786	22.4576	22.2446	22.7695	22.7618	23.1752	22.9202	25.5881	25.1927	25.1117	25.669	24.6273	24.5106	25.0707	24.826	24.6359	23.7946	24.2839	22.7286	24.5401	24.6506	24.7089	S	1	13	___MDDDNLDELVAHSPGPDGPPRVGSSELA	Phrf1	PHD and RING finger domain-containing protein 1	A6H619
NaN	NaN	NaN	NaN	NaN	NaN	NaN	NaN	NaN	NaN	NaN	NaN	NaN	NaN	NaN	22.192	21.9645	21.0229	NaN	NaN	NaN	23.0741	NaN	S	0.824789	1157	HKHRERSRERMDKQESVTRSRERRRWRSRSP	Phrf1	PHD and RING finger domain-containing protein 1	A6H619
23.8649	23.0543	23.8655	23.3033	22.7443	NaN	23.6874	24.3793	23.9334	21.2303	22.5295	23.7253	23.3201	22.627	22.6892	22.635	23.8355	23.5182	NaN	21.524	NaN	NaN	24.5498	S	0.999919	867	PGLLPSEITRTISINSPKAPAFQTVRCVTSY	Phrf1	PHD and RING finger domain-containing protein 1	A6H619
24.2725	23.456	23.6298	24.3143	24.8769	24.4375	25.0056	25.3555	NaN	25.2245	25.4516	25.4006	25.1633	24.8219	25.2978	25.254	24.5453	25.3601	25.266	25.1382	25.6319	26.176	NaN	S	0.999969	622	SDPSLTPRSGLSRTLSDENRPSRTHSSSPQL	Phrf1	PHD and RING finger domain-containing protein 1	A6H619
23.359	NaN	23.8345	NaN	NaN	24.1181	24.2783	24.0413	26.3745	25.5951	26.0456	26.1499	26.0198	25.745	25.9681	25.5111	25.8993	25.6094	25.803	24.3914	25.4887	25.7973	25.6688	S	0.997735	982	RTVTCVTVEEPGVLPSPDAPQITTHRIVEFR	Phrf1	PHD and RING finger domain-containing protein 1	A6H619
21.884	22.1747	23.1594	22.8765	22.1218	22.7716	22.7224	22.8548	NaN	23.3419	23.6775	23.4732	23.4395	23.3637	19.8285	22.7545	23.6094	23.4411	NaN	NaN	NaN	NaN	23.2214	S	1	4	____________MAESPAFLSAKDEGSFAYL	Armt1;1700052N19Rik	Protein-glutamate O-methyltransferase	A6H630
NaN	NaN	NaN	NaN	NaN	NaN	NaN	NaN	23.0328	NaN	NaN	NaN	22.497	NaN	22.2949	22.3869	24.1243	24.0446	23.0152	22.5322	NaN	NaN	22.5291	S	0.999916	833	EEVKEALHERLSRLESGGTNPTSSDSYSDRA	Ppp1r12b	Protein phosphatase 1 regulatory subunit 12B;Protein phosphatase 1 regulatory subunit	Q8BG95
NaN	NaN	NaN	NaN	NaN	NaN	NaN	NaN	NaN	NaN	24.3861	24.0415	25.2122	NaN	25.1642	23.3471	24.9944	NaN	NaN	25.3906	23.7594	24.7017	26.491	S	0.766628	503	ENKSYFSMLVPRRLSSTSDIEEKENRESAVN	Ppp1r12b	Protein phosphatase 1 regulatory subunit 12B;Protein phosphatase 1 regulatory subunit	Q8BG95
NaN	NaN	NaN	NaN	NaN	NaN	NaN	NaN	24.8759	25.5	25.4606	25.2999	25.509	25.4876	25.3476	25.5095	25.1798	NaN	25.1359	25.2202	24.6003	26.2701	24.2788	S	0.996521	693	SLRKARSRQARQTRRSTQGVTLTDLQEAEKT;SQRKARSRQARQSRRSTQGVTLTDLQEAEKT	Ppp1r12b;Ppp1r12a	Protein phosphatase 1 regulatory subunit 12B;Protein phosphatase 1 regulatory subunit;Protein phosphatase 1 regulatory subunit 12A	Q9DBR7
23.3773	23.2247	NaN	23.4098	23.2605	23.0978	23.5359	24.1785	NaN	NaN	NaN	NaN	NaN	NaN	NaN	NaN	NaN	NaN	NaN	NaN	NaN	NaN	NaN	S	0.849768	1321	FKPQSPYRAYKDRSTSLSALVRSSPNSSLGS	Dennd4c	DENN domain-containing protein 4C	A6H8H2
23.2741	23.259	22.6652	23.2092	23.2867	23.2205	22.9269	23.9477	23.5729	NaN	NaN	NaN	NaN	NaN	21.5696	21.4151	19.5285	21.9384	NaN	NaN	NaN	NaN	NaN	S	1	1310	AVSSSKTLTGRFKPQSPYRAYKDRSTSLSAL	Dennd4c	DENN domain-containing protein 4C	A6H8H2
24.2865	25.4723	23.9193	23.7995	24.7413	23.4851	23.5942	24.8261	NaN	26.2491	24.7182	NaN	NaN	NaN	26.0007	24.726	24.5605	23.686	NaN	22.9859	21.4768	24.9151	24.4702	S	0.99938	971	SAIVSKHLQPTPEPQSPTEPPAWGSSIVKVP	Dennd4c	DENN domain-containing protein 4C	A6H8H2
24.8465	24.8674	24.6484	24.3529	24.2171	24.5664	25.2277	25.1583	NaN	NaN	23.7622	24.0963	23.3955	24.5393	25.2114	24.5091	24.6774	24.5336	25.351	24.0368	23.8761	NaN	24.7159	S	0.999787	740	KLCFNRHPPGSSITNSPALMAKRTKQEIKTA	Dennd4c	DENN domain-containing protein 4C	A6H8H2
NaN	NaN	NaN	NaN	NaN	NaN	NaN	NaN	NaN	NaN	NaN	NaN	NaN	24.2244	NaN	24.0454	24.9404	24.0529	24.8017	NaN	NaN	NaN	NaN	S	0.766977	1087	ADAKILTAALTCPKTSPPHVTRTHSFENVNC	Dennd4c	DENN domain-containing protein 4C	A6H8H2
24.2313	24.5153	24.4467	24.1295	NaN	25.0444	25.631	25.6463	26.997	25.938	25.8628	26.2612	24.7257	25.6229	26.1845	24.9356	26.3768	25.99	26.2755	25.1842	25.7674	26.1665	26.2864	S	1	720	YSYTYFPRLDLKLFDSPQKLKLCFNRHPPGS	Dennd4c	DENN domain-containing protein 4C	A6H8H2
23.3712	23.4956	25.5722	23.1922	23.2188	23.0306	22.6707	24.053	24.3843	25.545	25.5555	25.5462	25.6503	25.0354	25.7228	25.2883	25.3226	25.186	24.0217	24.1817	24.9432	25.7217	26.0242	S	1	1221	TECVEKTSDSEDKLFSPVISRNLADEIESYM	Dennd4c	DENN domain-containing protein 4C	A6H8H2
24.8626	24.1996	24.5391	24.0282	25.0859	24.3142	24.5083	25.6323	NaN	NaN	NaN	NaN	NaN	NaN	NaN	21.27	22.0285	21.2802	NaN	NaN	NaN	NaN	NaN	S	0.996752	1240	SRNLADEIESYMNLKSPLGSKSCSMELHGEG	Dennd4c	DENN domain-containing protein 4C	A6H8H2
26.3658	26.135	26.2033	26.483	26.3393	NaN	NaN	25.902	NaN	27.1476	26.3142	NaN	23.7738	NaN	23.6362	21.3702	21.5455	20.9497	NaN	NaN	24.3616	26.1532	23.4237	S	0.977459	1637	PNSLSKRNVSLTRSHSVGGPLQNIDFSQRPF	Dennd4c	DENN domain-containing protein 4C	A6H8H2
23.303	23.2245	23.8888	23.7681	24.2285	23.4175	23.9452	24.1009	NaN	NaN	22.7821	24.3125	22.3799	23.3653	22.5909	23.7288	24.1126	24.0001	23.6067	23.8096	23.7008	24.2066	24.4496	S	0.998765	1274	PGSPAVFAHPLERSSSLPSDRGPPARDSTET	Dennd4c	DENN domain-containing protein 4C	A6H8H2
25.4343	25.4732	25.2349	26.0134	26.3177	26.197	26.7995	26.1453	27.4056	26.8827	27.2103	27.4705	26.1702	27.5159	26.5513	26.4023	25.767	26.3608	27.348	26.2807	26.6429	27.2354	27.6099	S	0.999997	1096	LTCPKTSPPHVTRTHSFENVNCHLADSRTRM	Dennd4c	DENN domain-containing protein 4C	A6H8H2
NaN	NaN	NaN	NaN	NaN	NaN	NaN	NaN	NaN	NaN	24.6817	24.8675	24.6372	NaN	24.0701	NaN	24.321	24.9239	NaN	23.0235	23.4227	24.8631	25.1711	S	1	377	DLEERTKNGVIRGQPSPLAQVQQ________	Mapk8	Mitogen-activated protein kinase 8;Mitogen-activated protein kinase	Q91Y86
NaN	NaN	NaN	NaN	NaN	NaN	NaN	NaN	27.0316	26.6269	26.9441	27.1282	26.656	26.1994	27.3905	NaN	26.3303	25.9852	26.664	26.1836	26.3633	27.323	25.9188	S	0.88787	582	TFEGNITKQLVKRLTSAEGPVTTDKLFFEGS	Fam65b	Protein FAM65B	Q80U16
23.4499	NaN	22.6726	22.7836	23.8126	NaN	24.6302	24.2234	25.1108	25.1872	23.5937	NaN	24.1751	NaN	23.4243	24.8241	23.9292	23.4003	24.6422	24.4086	23.4581	24.6514	25.114	S	0.995569	46	QSFSPGGPNGIIRSQSFAGFSGLQERRSRCN	Fam65b	Protein FAM65B	Q80U16
23.5876	23.0993	NaN	23.7903	23.6571	NaN	NaN	24.4723	26.1069	26.8443	25.0254	NaN	NaN	25.6446	25.8227	25.7491	24.5272	24.2696	25.4676	24.3207	24.0627	25.9653	25.9418	S	0.996365	860	FPVEDMQPSKLMRLLSSSDDDANILSSPTDR	Med24	Mediator of RNA polymerase II transcription subunit 24	Q99K74
24.8436	24.7091	25.0485	25.1569	NaN	25.1727	25.1094	25.1417	NaN	27.0002	27.0856	26.99	26.8262	26.8219	26.7898	26.9225	26.9474	26.6777	NaN	25.9282	25.3936	26.3637	26.9065	S	0.954477	871	MRLLSSSDDDANILSSPTDRSMNSSLSASQL	Med24	Mediator of RNA polymerase II transcription subunit 24	Q99K74
23.1503	23.6678	22.8304	NaN	23.8525	24.1931	24.3796	24.7109	27.0198	NaN	23.8998	25.9187	25.0465	25.4093	25.8746	25.1462	25.4269	25.2677	25.4986	NaN	25.8718	26.7927	25.5634	S	0.999934	222	TPKEGASQNCSFPRASPRSLGKARRRSSTGL	Coil	Coilin	Q5SU73
26.2578	26.0534	26.0107	26.7226	26.7626	26.8777	26.5167	26.6729	27.6748	27.1719	27.6521	27.5755	26.5716	27.13	27.7756	27.6604	27.8121	27.7767	27.8784	27.6973	27.1526	27.4987	28.1142	S	1	146	KHCKRQEDSGQNEKASDLETKLLPDETGRTK	Coil	Coilin	Q5SU73
24.5587	24.2307	25.3346	25.234	24.4319	24.9912	24.8317	24.7411	26.5631	28.0381	27.764	28.238	27.4138	27.2759	27.7827	26.9532	27.8411	26.9086	26.5886	27.0764	27.7484	27.3437	27.6518	S	0.999999	171	ETGRTKSKKKSKVTGSPAEEDEEETKKKSSK	Coil	Coilin	Q5SU73
NaN	NaN	NaN	25.2332	NaN	NaN	NaN	NaN	NaN	NaN	24.9628	25.4095	NaN	NaN	NaN	NaN	NaN	NaN	25.8941	NaN	25.323	NaN	NaN	S	0.898424	161	EDYSFKISYIPDEEVSSPSPPHRAREQGHGP	Igf2bp2	Insulin-like growth factor 2 mRNA-binding protein 2	Q5SF07
27.5036	27.5546	27.9415	27.7231	27.6165	27.5866	27.7165	27.5995	28.0402	28.771	28.7078	29.5097	28.7373	28.5251	28.9395	28.0947	27.8275	28.7604	28.5992	27.3732	28.7873	27.769	29.0712	S	0.984921	162	DYSFKISYIPDEEVSSPSPPHRAREQGHGPG	Igf2bp2	Insulin-like growth factor 2 mRNA-binding protein 2	Q5SF07
27.6296	27.5008	27.8046	27.7484	27.8723	27.6563	28.3151	28.2819	28.7915	28.8383	28.6241	28.7127	28.7872	28.216	27.0192	28.5531	28.7557	28.7165	28.6432	28.5662	28.6201	28.9444	28.9255	S	0.999868	164	SFKISYIPDEEVSSPSPPHRAREQGHGPGSS	Igf2bp2	Insulin-like growth factor 2 mRNA-binding protein 2	Q5SF07
23.5261	23.3395	24.0142	NaN	22.7012	22.7912	NaN	23.0369	23.892	23.6985	23.8314	23.0758	24.1807	23.631	24.2086	24.372	24.3486	24.5665	23.6048	23.5885	23.1294	23.3188	24.4286	S	0.999999	343	GQRLSVEKATIRPAKSMDSLCSVPVEGKENK	Arhgap31	Rho GTPase-activating protein 31	A6X8Z5
NaN	NaN	NaN	NaN	NaN	NaN	NaN	NaN	NaN	26.0928	NaN	24.2709	24.3843	23.0771	24.3191	22.7569	22.7686	24.5295	NaN	23.0872	NaN	23.829	24.0941	S	0.999972	1242	IPQKSTKDDSPSSLGSPEEEQPKQETGASAS	Arhgap31	Rho GTPase-activating protein 31	A6X8Z5
24.4684	24.1884	24.4409	24.0566	24.0763	23.6364	24.0755	24.3542	24.7871	NaN	25.8138	25.2849	24.8091	24.9389	25.5079	24.9661	24.7489	24.6975	23.8696	NaN	19.2775	22.9241	25.0511	S	1	272	SLATNHPARKERRENSLPEIVPPPFHTVLEL	Arhgap31	Rho GTPase-activating protein 31	A6X8Z5
26.4176	26.3991	27.0031	26.1306	25.3933	25.6252	26.226	26.2191	26.7484	26.9193	26.6252	27.0068	26.6923	26.3882	26.184	26.4528	26.9404	26.969	26.4814	26.3079	26.3774	26.5366	20.3233	S	0.971051	850	NARHAVPENKGPGLPSPTKEVDIIPQEEGGA	Arhgap31	Rho GTPase-activating protein 31	A6X8Z5
24.6283	20.6364	24.2753	25.3046	24.9347	25.012	25.4786	25.6246	27.862	26.7489	25.4572	26.5122	NaN	NaN	26.9371	26.0357	NaN	NaN	26.988	26.9499	27.006	27.063	25.9234	S	1	332	KLSRNGSVFVRGQRLSVEKATIRPAKSMDSL	Arhgap31	Rho GTPase-activating protein 31	A6X8Z5
26.3209	26.5517	27.0958	26.7671	26.4607	26.7236	NaN	26.6874	25.8345	26.8517	26.8758	25.1109	24.6003	26.6812	25.7888	25.0102	23.9915	24.7651	25.1368	23.2707	21.3218	26.3565	24.7849	S	0.882356	1093	KNTECGPSKGKHRPSSLNLDSATPIADLFRL	Arhgap31	Rho GTPase-activating protein 31	A6X8Z5
23.8075	23.2013	23.7435	24.8855	24.6413	NaN	24.8702	25.0842	24.6046	NaN	21.3734	23.5541	NaN	NaN	22.3928	23.5959	22.8006	23.6918	NaN	NaN	23.0819	23.5603	NaN	S	1	935	GSQGHRLERRLCHRPSLRQSHSLDSKTTGNS	Arhgap31	Rho GTPase-activating protein 31	A6X8Z5
NaN	NaN	NaN	NaN	NaN	NaN	NaN	NaN	NaN	NaN	NaN	24.0041	22.8689	23.877	24.0442	23.374	23.4773	23.1265	NaN	22.4089	NaN	22.5633	NaN	S	0.871294	1116	PIADLFRLENGAPFSSPGIELSELGDTKVTW	Arhgap31	Rho GTPase-activating protein 31	A6X8Z5
24.2356	NaN	23.1781	25.6928	25.1624	24.7578	25.0901	25.5237	NaN	23.9229	23.525	24.1812	NaN	21.8034	23.5882	NaN	23.5517	NaN	NaN	20.9615	23.2886	23.8758	NaN	S	0.931523	384	GFFIPATKMHASSTGSSCDLSKEGEWGQEGM	Arhgap31	Rho GTPase-activating protein 31	A6X8Z5
26.0942	26.0739	26.2291	25.9904	25.8578	25.9	26.1601	26.2326	26.2648	26.6917	26.3477	26.57	26.1479	25.9775	26.0906	25.556	26.2716	25.572	24.9755	25.075	25.984	26.1718	26.5337	S	0.999987	765	VSSPARIEIGGPRNLSPPLTPAPPPPTPLEE	Arhgap31	Rho GTPase-activating protein 31	A6X8Z5
25.9428	25.5133	25.4224	25.6399	24.8271	24.9886	25.3513	25.2147	25.3305	25.0874	25.3824	25.9779	25.883	25.5838	26.99	26.1663	26.3938	26.9658	25.6541	24.2156	25.2341	25.6319	27.5092	S	1	1163	QDLDIVAHTLTGRRNSAPVSVSAVRTSFMVK	Arhgap31	Rho GTPase-activating protein 31	A6X8Z5
25.9242	25.6216	25.2186	25.8526	25.1233	24.8954	25.2412	25.0406	NaN	NaN	NaN	NaN	NaN	NaN	NaN	NaN	NaN	NaN	NaN	NaN	NaN	NaN	NaN	S	0.992775	1331	GGPKAFHRSRPGRPQSLILFPIMDHLPSSPT	Arhgap31	Rho GTPase-activating protein 31	A6X8Z5
24.0389	23.348	23.897	24.9648	24.9419	23.6918	23.8541	25.1081	24.7331	24.1766	24.2099	24.9188	22.9587	24.2739	24.5577	23.6909	23.8096	22.704	23.6889	21.8115	22.8825	24.4142	24.2146	S	1	464	PGKSVFTSSLFQMEPSPRHQRKALNISEPFA	Arhgap31	Rho GTPase-activating protein 31	A6X8Z5
23.9497	23.2547	24.0493	NaN	NaN	NaN	NaN	NaN	NaN	NaN	NaN	23.2238	NaN	NaN	NaN	NaN	NaN	NaN	NaN	NaN	NaN	NaN	NaN	S	0.766984	667	SEEEFSSLPPAAQKTSPIPESSPAPFPFPEA	Arhgap31	Rho GTPase-activating protein 31	A6X8Z5
25.1547	25.0604	25.5342	25.266	24.8721	25.0251	25.2617	25.3605	NaN	26.4669	25.4508	26.5502	24.8503	25.8921	25.3496	NaN	25.9875	26.3063	25.8725	24.9711	25.5066	24.549	NaN	S	0.796125	23	KHRDAAPRPPRSARSSPPPLSGASEVDAGEL	Dpy19l1	Probable C-mannosyltransferase DPY19L1	A6X919
22.576	22.764	19.2987	23.1462	23.2223	22.665	22.931	NaN	NaN	NaN	NaN	NaN	NaN	NaN	NaN	24.2876	24.7581	22.5735	22.0169	22.3324	23.4184	23.013	24.2068	S	0.999966	46	SEVDAGELGSERTPPSPGRRGAAGRKGPRAG	Dpy19l1	Probable C-mannosyltransferase DPY19L1	A6X919
NaN	NaN	NaN	NaN	NaN	NaN	NaN	NaN	NaN	NaN	23.0918	23.5588	NaN	NaN	NaN	NaN	NaN	NaN	NaN	NaN	NaN	23.1507	NaN	S	0.825827	255	NPDNGSPAMTHRNLTSSSLNDISDKPEKDQL	Slc4a4	Electrogenic sodium bicarbonate cotransporter 1;Anion exchange protein	O88343
24.155	23.8291	24.7369	23.5916	24.3337	24.7191	24.8925	24.8457	24.0385	NaN	25.0547	24.8908	25.1679	24.9777	24.2715	25.1659	24.4145	24.9292	21.9457	NaN	24.589	23.996	24.0744	S	0.98452	257	DNGSPAMTHRNLTSSSLNDISDKPEKDQLKN	Slc4a4	Electrogenic sodium bicarbonate cotransporter 1;Anion exchange protein	O88343
NaN	NaN	NaN	NaN	NaN	NaN	NaN	NaN	23.0788	23.4467	23.3057	23.001	22.6842	22.6783	23.1125	22.8923	22.1839	22.2066	22.3091	22.066	21.4125	NaN	22.7432	S	0.99999	628	SAEGGAKRQEHLSRFSMPDLSKDSGMNVSEK	Prickle2	Prickle-like protein 2	A7YQ68
NaN	NaN	NaN	NaN	NaN	NaN	NaN	22.9387	24.5743	24.9546	24.681	25.7484	24.5363	24.3028	25.4376	24.843	24.6318	22.5463	24.6	24.3265	23.7121	24.0692	24.7895	S	1	723	SSKLPGQEGVHIQPMSERTRRRTTSRDDNRR	Prickle2	Prickle-like protein 2	A7YQ68
25.117	24.7715	24.4043	24.5401	24.4424	25.0757	25.1787	25.2696	25.9391	26.3905	26.2844	26.9671	26.6109	26.4532	27.2328	25.6829	25.2931	25.837	27.6733	25.4629	25.6936	26.865	26.8693	S	0.967626	582	EGGISTQQCRPRRPLSSLKYTEDMTPTEQTP	Prickle2	Prickle-like protein 2	A7YQ68
NaN	NaN	NaN	NaN	NaN	NaN	NaN	NaN	24.7008	NaN	NaN	24.3036	NaN	NaN	NaN	21.2828	22.18	22.5378	24.9539	NaN	23.3421	23.4307	NaN	S	0.945558	750	DNRRFRPHRSRRSRRSRSDNALHLASEREVI	Prickle2	Prickle-like protein 2	A7YQ68
24.8254	NaN	NaN	24.8287	25.3437	25.561	26.2487	26.3185	25.6391	25.5318	26.3967	26.3912	24.3509	NaN	26.0466	25.9641	26.4874	25.8745	NaN	NaN	24.6192	25.693	24.7911	S	0.999991	752	RRFRPHRSRRSRRSRSDNALHLASEREVIAR	Prickle2	Prickle-like protein 2	A7YQ68
22.2702	22.0476	22.4666	22.7316	23.4283	23.345	23.8603	23.5546	NaN	NaN	23.8246	23.0778	NaN	NaN	21.7643	NaN	NaN	NaN	NaN	NaN	23.0389	NaN	24.0745	S	0.99177	797	QFMRQRSFQESLGQGSRRDLYSQCPRTVSDL	Prickle2	Prickle-like protein 2	A7YQ68
21.1973	23.8223	23.474	23.4095	23.6847	23.8688	24.334	24.3942	NaN	25.5165	24.9761	25.2996	25.2562	24.7576	25.4877	22.0346	24.1273	NaN	24.5334	23.4235	24.4122	25.1562	25.1466	S	0.999986	810	QGSRRDLYSQCPRTVSDLALQNAFGERWGPY	Prickle2	Prickle-like protein 2	A7YQ68
NaN	NaN	NaN	NaN	NaN	NaN	NaN	NaN	23.3696	NaN	22.4779	22.9572	20.8062	22.8702	23.293	22.775	21.521	22.7701	22.8241	20.9557	21.214	21.3388	23.3756	S	0.986432	863	LGEPIPQPARLRYVTSDELLHKYSSYGVPKS	Prickle2	Prickle-like protein 2	A7YQ68
NaN	NaN	NaN	NaN	NaN	NaN	NaN	NaN	NaN	NaN	23.2623	23.3533	23.0554	23.3296	23.3831	21.5075	23.0108	21.7138	NaN	NaN	21.0299	NaN	22.1027	S	0.879418	861	LLIRQDALPAVLSASSPQQLTRGAGETSAVL	Thada	Thyroid adenoma-associated protein homolog	A8C756
NaN	NaN	NaN	NaN	NaN	NaN	NaN	NaN	25.1703	25.4604	25.5647	25.9656	25.7272	25.3971	25.8081	25.5947	25.6859	24.1104	24.9286	23.4743	24.6474	25.1141	25.284	S	0.999998	635	EQLSSYEDKLFDVCGSQDLESDLGRLKEEIE	Rad50	DNA repair protein RAD50	P70388
23.0143	22.6584	22.5152	23.6862	24.2113	23.9869	24.6125	24.5792	24.9526	NaN	19.8642	NaN	NaN	NaN	23.9592	25.2108	25.1396	24.4852	NaN	24.0157	23.9451	21.4634	23.8692	S	1	35	EGNVKILRKLLKKGRSVDVADNRGWMPIHEA	Asb3	Ankyrin repeat and SOCS box protein 3	Q9WV72
NaN	NaN	NaN	NaN	NaN	NaN	NaN	NaN	23.1263	NaN	23.8102	NaN	21.2051	23.8661	NaN	NaN	NaN	NaN	NaN	21.8864	20.4146	NaN	21.3241	S	0.999889	596	GNTKHNIEIEYVPRKSDAGISSADAPRKFNM	Lingo1	Leucine-rich repeat and immunoglobulin-like domain-containing nogo receptor-interacting protein 1	Q9D1T0
NaN	NaN	NaN	NaN	NaN	NaN	NaN	NaN	25.7325	26.3993	NaN	21.4159	25.753	25.1512	25.6306	26.0783	25.3056	26.3281	24.9429	NaN	23.8172	25.2728	26.793	S	0.982299	559	TYTAKPVGGLSGSGGSPTGTGRGSSQLQAPP	Zbtb4		Q5F293
24.9342	25.0245	25.8667	25.4443	25.4071	25.5813	25.6212	26.0705	27.0531	27.1608	27.558	27.3983	26.7895	26.7442	27.4404	27.0601	26.9411	26.6393	26.8775	26.7723	26.8805	27.5652	26.8779	S	1	162	NEERGLEKLLHLGPPSPLKTPFLSWESDPLY	Pttg1	Securin	Q9CQJ7
NaN	NaN	NaN	NaN	NaN	NaN	NaN	NaN	23.459	26.3613	25.1007	25.8033	25.365	23.2014	25.9096	25.214	24.3865	24.8165	22.8441	23.7572	23.8625	22.9454	26.8458	S	1	82	PLKKIRLHEDGIDNLSEDGKEGVSVTEDESM	Pus10	Putative tRNA pseudouridine synthase Pus10	Q9D3U0
23.3044	24.3197	24.5806	23.7048	24.2974	24.1799	24.1685	24.8799	28.2501	28.4486	27.918	28.7619	27.9043	28.1471	28.4206	27.6922	27.4253	27.7874	27.9958	27.6579	27.124	25.3787	26.8492	S	0.959798	325	TGQDTAKTKQRKRKKSTAACGVEAHSDAIQP	Supt3		Q8BVY4
NaN	NaN	NaN	NaN	NaN	NaN	NaN	NaN	24.8925	NaN	NaN	24.3154	23.9421	NaN	24.4658	23.0632	NaN	24.7566	24.2903	NaN	NaN	NaN	23.4653	S	0.795579	2	______________MSSGGAEDDIPQGERKT	Scai		B0R0E3
NaN	NaN	NaN	NaN	NaN	NaN	NaN	NaN	24.2554	23.7656	23.6863	22.5347	23.0536	23.9952	24.284	NaN	NaN	22.9571	NaN	23.4601	24.2472	NaN	NaN	S	1	1445	IISKAFGGEEVVLKGSPEEKVELAEKNEPSQ	Zfp318;Znf318	Zinc finger protein 318	B0V2M3
NaN	NaN	NaN	NaN	NaN	NaN	NaN	NaN	24.3268	24.3729	21.8774	23.4212	23.8601	NaN	23.0933	23.4997	24.4358	23.9428	24.1517	22.7441	24.1655	22.2864	24.4122	S	0.999991	1038	EKPEKEKSKSPEKELSPSNSSSSNKESKMNE	Zfp318;Znf318	Zinc finger protein 318	B0V2M3
22.3021	NaN	23.2353	22.8871	23.7207	23.2984	23.8504	23.1762	NaN	NaN	NaN	NaN	NaN	NaN	NaN	24.7204	23.31	24.4263	NaN	NaN	NaN	23.8061	NaN	S	0.999568	269	EDYRTRETFLHRPEFSPQSSCHDELLRGTER	Zfp318;Znf318	Zinc finger protein 318	B0V2M3
23.0302	22.5918	23.7344	23.16	23.8004	23.1062	23.6156	23.9412	NaN	NaN	23.7194	23.6378	24.1882	24.2487	NaN	NaN	22.6681	23.2119	NaN	NaN	23.0172	NaN	NaN	S	0.930258	580	EKFLYGDEEEDIKSESPLKSLEDPESAGTRQ	Zfp318;Znf318	Zinc finger protein 318	B0V2M3
NaN	NaN	NaN	NaN	NaN	NaN	NaN	NaN	NaN	NaN	NaN	NaN	NaN	22.8203	NaN	NaN	NaN	NaN	23.4847	NaN	NaN	NaN	NaN	S	0.995229	670	SRPSADRRLSADRHLSGDRHFSADRCSSVEH	Zfp318;Znf318	Zinc finger protein 318	B0V2M3
NaN	NaN	NaN	NaN	NaN	NaN	NaN	NaN	NaN	24.7564	23.515	23.6824	20.7488	NaN	24.6505	22.6008	23.7857	NaN	NaN	23.8772	22.6261	NaN	NaN	S	0.801087	192	EESLRITVGNDHFCVSTPERRRLSDRLGSPV	Zfp318;Znf318	Zinc finger protein 318	B0V2M3
NaN	NaN	NaN	NaN	NaN	NaN	NaN	NaN	25.8587	25.644	25.48	25.8831	25.1036	24.2205	25.6849	25.1471	24.6046	24.0491	23.8152	NaN	21.1679	22.6887	25.0235	S	1	205	CVSTPERRRLSDRLGSPVDGLQDMDRDDLTD	Zfp318		B0V2M3
21.6585	21.6696	22.3846	22.9495	23.8286	23.4451	23.3664	24.1815	NaN	NaN	NaN	NaN	NaN	NaN	NaN	NaN	NaN	NaN	NaN	NaN	NaN	NaN	NaN	S	0.999999	664	HGKKPSSRPSADRRLSADRHLSGDRHFSADR	Zfp318;Znf318	Zinc finger protein 318	B0V2M3
NaN	NaN	NaN	NaN	NaN	NaN	NaN	NaN	NaN	25.3722	NaN	NaN	25.6152	NaN	26.4871	NaN	NaN	NaN	26.0633	NaN	24.3961	NaN	NaN	S	0.782051	40	PGRPVGASSGPTRRPSSPPPPSCSSLRLPAR	Zfp318		B0V2M3
NaN	NaN	NaN	NaN	NaN	NaN	NaN	NaN	25.9426	25.0381	24.0882	25.5073	24.8408	24.5581	25.8273	24.2541	NaN	25.1953	25.4926	24.2278	NaN	NaN	25.3374	S	0.998102	41	GRPVGASSGPTRRPSSPPPPSCSSLRLPARR	Zfp318		B0V2M3
NaN	NaN	NaN	NaN	NaN	NaN	NaN	NaN	25.8634	25.7754	25.5329	25.9726	25.7987	25.5867	25.7954	25.6855	25.6176	25.6832	25.4068	25.1876	25.222	24.7468	26.0557	S	1	557	SMLADPTITQEKRRRSFPDIEDEEKFLYGDE	Zfp318;Znf318	Zinc finger protein 318	B0V2M3
NaN	NaN	NaN	NaN	NaN	NaN	NaN	NaN	26.5375	26.1912	26.0448	21.9428	26.2782	NaN	24.6621	26.2212	24.7589	25.681	NaN	24.7327	24.5717	25.4592	24.0427	S	0.999984	167	GRGDHPGGGGGSRRRSPGLCSDSSLEESLRI	Zfp318		B0V2M3
NaN	NaN	NaN	NaN	NaN	NaN	NaN	NaN	25.7521	25.2084	25.2159	25.6385	25.2416	NaN	25.7599	25.2032	25.3474	25.8661	26.3423	24.7254	24.528	24.2259	26.1225	S	0.974103	1988	MHANFHNSQTEQTRRSPTALSEKMSEEISVS	Zfp318;Znf318	Zinc finger protein 318	B0V2M3
NaN	NaN	NaN	NaN	NaN	NaN	NaN	NaN	NaN	26.1593	23.7775	NaN	24.4317	23.4315	25.1763	24.5079	24.1377	25.0688	NaN	22.7984	NaN	23.7675	25.958	S	0.954211	1059	SSNKESKMNEKSCIKSPSSTESLQPTVKQSD	Zfp318;Znf318	Zinc finger protein 318	B0V2M3
NaN	NaN	NaN	NaN	NaN	NaN	NaN	NaN	24.2089	24.0358	23.8972	24.0688	23.9624	23.4143	23.9894	23.614	23.5094	23.2531	NaN	NaN	23.1971	24.0289	23.716	S	0.862062	1878	LMTGHENTSKVVIELSPSLPSKRTKIDLFPS	Zfp318;Znf318	Zinc finger protein 318	B0V2M3
NaN	NaN	NaN	NaN	NaN	NaN	NaN	NaN	NaN	NaN	NaN	NaN	22.5291	NaN	NaN	23.9704	24.3373	NaN	NaN	NaN	23.7106	NaN	NaN	S	0.773147	416	SHRRRSQPKKSKPEESRSPGEATAGVSTLDE	Kdm4b	Lysine-specific demethylase 4B	Q91VY5
NaN	NaN	NaN	NaN	NaN	NaN	NaN	NaN	23.9869	NaN	NaN	NaN	NaN	NaN	NaN	22.6514	22.3295	22.2079	NaN	NaN	NaN	NaN	NaN	S	0.999999	1053	FSGDDVKAAKRPRVASVLATTTEDTGRSPEY	Kdm4b	Lysine-specific demethylase 4B	Q91VY5
NaN	NaN	NaN	NaN	NaN	NaN	NaN	NaN	NaN	23.3204	22.5945	24.036	22.1672	23.3049	23.7304	22.8137	22.4057	23.2889	23.5997	21.7898	23.2229	20.5555	23.6762	S	0.971874	473	AGTGSSEHEDGEREGSPRTHPRPSISMPLPT	Dmxl2	DmX-like protein 2	B0V2P5
NaN	NaN	NaN	NaN	NaN	NaN	NaN	NaN	24.6863	23.9877	25.4269	25.3846	NaN	NaN	25.3678	23.6286	24.6603	24.1465	24.0838	21.5405	22.8261	24.4266	NaN	S	0.999591	1288	AQWKHSVKFGNVDADSPVEETIQDHSALKSS	Dmxl2	DmX-like protein 2	B0V2P5
22.6176	22.5587	24.1816	24.236	23.6747	24.5655	NaN	23.8146	NaN	25.2476	26.2221	24.8203	22.6193	NaN	21.2344	24.8928	23.399	24.6065	21.611	23.1352	23.3582	24.1209	22.3255	S	0.993456	2637	QETFIRYIFTKKRKQSESVEEHVEQVKHNSV	Dmxl2		B0V2P5
NaN	NaN	NaN	NaN	NaN	NaN	NaN	NaN	23.8232	23.6292	23.0298	23.4864	23.2382	22.9429	23.4769	22.2616	23.2052	21.867	23.0473	21.8367	21.9757	23.21	23.4083	S	0.999908	1856	NYLRTHPLLIRRNLASPEGTLATLGLKTEKN	Dmxl2	DmX-like protein 2	B0V2P5
23.8885	24.0423	22.3981	24.6625	24.3384	24.7465	25.2554	24.8826	25.6357	25.1377	25.2718	25.6178	24.8143	25.0254	NaN	25.0134	25.1625	24.9904	25.4324	25.0625	NaN	24.2117	24.6163	S	0.879471	30	SAPAGLRAGPAASRESVDSSEAEERSLQHML	5031439G07Rik		B1APX2
26.5294	26.2609	26.23	25.9769	26.5831	26.6779	27.1218	27.0598	25.3376	26.5979	27.1623	27.0216	26.4852	26.8265	27.0394	26.4845	26.279	26.174	26.74	25.8957	26.0137	25.5302	27.0524	S	0.99971	347	STPPTPERNNRPAFFSPSLKRKVPRNRIAEM	5031439G07Rik	Uncharacterized protein KIAA0930 homolog	B1APX2
NaN	NaN	NaN	NaN	NaN	NaN	NaN	NaN	23.4955	NaN	21.6472	NaN	NaN	NaN	NaN	NaN	NaN	NaN	22.9174	NaN	NaN	NaN	NaN	S	0.955575	349	PPTPERNNRPAFFSPSLKRKVPRNRIAEMKK	5031439G07Rik	Uncharacterized protein KIAA0930 homolog	B1APX2
26.22	26.1192	26.3944	26.2821	26.6839	26.8086	26.9772	26.7074	26.6802	26.9077	27.1705	26.795	27.0663	NaN	27.1732	26.8901	26.8079	26.2758	26.2695	26.1549	24.6658	26.5869	26.9444	S	0.999948	367	RKVPRNRIAEMKKSHSANDSEEFFREDDSGA	5031439G07Rik	Uncharacterized protein KIAA0930 homolog	B1APX2
23.8401	24.367	23.8868	24.7624	25.2961	24.1679	24.0336	25.328	23.8728	23.187	22.8062	22.8426	22.1046	22.9689	23.1788	22.386	22.464	20.5249	22.2911	20.7505	21.6941	22.2799	22.7134	S	0.999999	405	LRSRSLSGTGRSLVGSWLKLNRADGNFLLYA	5031439G07Rik	Uncharacterized protein KIAA0930 homolog	B1APX2
24.2252	24.3444	24.1071	24.2952	24.5806	24.713	25.4229	25.5831	25.6752	25.6071	NaN	24.9099	23.5902	NaN	24.6537	24.8863	24.337	23.7663	23.5259	23.821	NaN	NaN	24.6603	S	0.996158	311	GHAEMAVSRVSTGDTSPCGTEDSSPASPMHE	5031439G07Rik	Uncharacterized protein KIAA0930 homolog	B1APX2
NaN	22.6978	23.4094	23.5884	23.4807	24.0613	24.4142	24.6098	24.1381	NaN	NaN	23.1241	NaN	24.0171	NaN	22.8837	NaN	NaN	23.8402	NaN	22.7599	NaN	NaN	S	0.999511	37	NRSAEPTREPGAEAESGSESEPEPGPGPRLG	Unc119	Protein unc-119 homolog A	Q9Z2R6
NaN	NaN	NaN	NaN	NaN	NaN	NaN	NaN	NaN	NaN	22.9087	NaN	NaN	NaN	NaN	NaN	NaN	22.8004	NaN	NaN	NaN	NaN	NaN	S	0.999694	39	SAEPTREPGAEAESGSESEPEPGPGPRLGPL	Unc119	Protein unc-119 homolog A	Q9Z2R6
NaN	NaN	23.6693	23.4937	23.5416	23.8115	NaN	23.9971	NaN	NaN	25.2074	24.3882	24.0263	NaN	24.3079	24.2619	25.3869	24.6095	NaN	NaN	23.6629	24.0833	24.0337	S	0.93988	578	QRPGSWASRDTIFSTSPKLLARAITNGHRLK	Usp36	Ubiquitin carboxyl-terminal hydrolase 36	B1AQJ2
NaN	NaN	NaN	NaN	NaN	NaN	NaN	NaN	NaN	22.5985	20.2998	NaN	24.5051	24.8979	25.3058	24.8638	24.1381	25.2961	23.8057	NaN	NaN	NaN	24.1643	S	1	75	YVLLSARAEGASRHRSGDELQARKPGTERVS	Usp36	Ubiquitin carboxyl-terminal hydrolase 36	B1AQJ2
NaN	NaN	NaN	NaN	NaN	NaN	NaN	NaN	24.3212	24.9165	24.4988	23.9385	22.8402	24.1056	24.4833	NaN	24.5438	22.4967	23.981	22.9944	23.7762	20.0838	24.308	S	1	18	IVDKLKEALKPGRKDSAEDGDLGRLLAASAK	Usp36	Ubiquitin carboxyl-terminal hydrolase 36	B1AQJ2
21.817	21.3226	22.4221	NaN	22.2544	22.9138	22.3453	23.9499	NaN	26.9755	25.9901	26.7061	25.5388	25.992	26.2509	26.2565	24.9493	25.9592	26.0619	25.28	26.6588	25.8315	26.8737	S	0.999999	841	RGAPAAARRKRKKRCSEGEGATAPKQEGQFQ	Usp36	Ubiquitin carboxyl-terminal hydrolase 36	B1AQJ2
NaN	NaN	NaN	NaN	NaN	NaN	NaN	NaN	NaN	NaN	NaN	NaN	NaN	NaN	NaN	24.0317	NaN	23.6355	NaN	NaN	NaN	NaN	NaN	S	0.770204	899	DSYHVSSRKRRKRKRSEGLSQEATPSQDLIQ	Usp36	Ubiquitin carboxyl-terminal hydrolase 36	B1AQJ2
24.4244	NaN	24.8798	24.2271	24.4347	24.4296	24.5	24.6218	NaN	26.2198	NaN	25.0736	25.3259	NaN	25.1895	NaN	25.4593	25.1992	NaN	25.3572	NaN	25.8868	25.1602	S	0.923359	1221	GQLPGPAAEEAPGRLSPPTAPDERPAADTRS	Arhgap23	Rho GTPase-activating protein 23	Q69ZH9
NaN	22.6841	23.3003	23.3483	23.8144	23.4506	23.5496	24.1227	25.1182	22.924	23.9873	24.1454	NaN	NaN	21.7166	23.9802	25.3749	24.8076	NaN	21.1178	24.9243	26.0538	24.6224	S	0.935768	1454	DSGLSSLESTKARASSAASLPSGDLGALQGL	Arhgap23	Rho GTPase-activating protein 23	Q69ZH9
25.0312	24.2706	24.5375	25.4647	25.2698	25.5104	25.8566	25.7672	26.1312	22.8856	21.2099	25.8856	NaN	25.1197	25.972	24.572	24.353	24.8311	25.8472	24.4264	NaN	25.708	NaN	S	0.999999	351	DALSQLGQEGWHRARSDDYLSRATRSAEALG	Arhgap23	Rho GTPase-activating protein 23	Q69ZH9
23.8786	24.1266	24.5283	24.3568	24.1942	24.0519	24.4461	25.2383	NaN	NaN	NaN	NaN	NaN	NaN	NaN	NaN	NaN	NaN	NaN	24.5643	NaN	NaN	NaN	S	1	361	WHRARSDDYLSRATRSAEALGPGALVSPRLE	Arhgap23	Rho GTPase-activating protein 23	Q69ZH9
26.0044	26.0586	26.2768	25.7156	25.7514	26.0801	25.9252	26.2637	27.7441	27.2582	27.3276	27.4247	27.3232	27.1313	27.3562	27.1974	26.376	27.1642	27.0417	26.5732	27.1391	27.0401	27.6102	S	1	372	RATRSAEALGPGALVSPRLERCGWASQRPSA	Arhgap23	Rho GTPase-activating protein 23	Q69ZH9
NaN	NaN	NaN	NaN	NaN	NaN	NaN	NaN	NaN	NaN	22.2321	22.4692	NaN	NaN	NaN	NaN	NaN	NaN	NaN	24.1231	23.83	24.9044	NaN	S	0.864737	1428	NFNEWKELGGGGPQESVGVRPHSDNKDSGLS	Arhgap23	Rho GTPase-activating protein 23	Q69ZH9
NaN	NaN	NaN	NaN	NaN	NaN	NaN	NaN	NaN	24.7316	23.1697	25.0076	24.2379	NaN	NaN	NaN	NaN	NaN	NaN	NaN	NaN	NaN	23.7367	S	0.952973	1435	LGGGGPQESVGVRPHSDNKDSGLSSLESTKA	Arhgap23	Rho GTPase-activating protein 23	Q69ZH9
NaN	NaN	NaN	NaN	NaN	NaN	NaN	NaN	NaN	23.3715	22.8284	23.1084	22.439	22.2726	22.6563	22.7633	23.2967	22.5084	23.0413	22.7801	23.0713	22.865	23.1677	S	0.997963	1189	KRREARGLGSSTDDDSEQEAHKAAVGTQEPP	Arhgap23	Rho GTPase-activating protein 23	Q69ZH9
24.6345	25.3537	26.2775	25.0861	25.5437	25.3919	25.4535	24.9835	25.8899	27.2042	27.4499	26.9851	26.3351	26.4732	25.5478	27.5874	NaN	26.6675	NaN	25.7966	22.4382	27.1976	26.3985	S	0.98112	673	SWGTSEDADAPSKRHSTSDLSDATFSDIRRE	Arhgap23	Rho GTPase-activating protein 23	Q69ZH9
24.6832	23.8962	24.5482	25.1933	25.9483	25.8245	25.9671	26.2271	25.2042	24.1615	23.6547	24.9437	24.2303	24.057	24.9691	24.0178	24.1991	24.871	24.6603	23.8067	22.9049	23.5132	25.3292	S	1	594	SPSSPTFTFALSRHYSQDCSSIKAGRRSSYL	Arhgap23	Rho GTPase-activating protein 23	Q69ZH9
NaN	NaN	NaN	NaN	NaN	NaN	NaN	NaN	22.7808	NaN	22.0154	NaN	21.3558	22.2425	NaN	NaN	NaN	NaN	NaN	NaN	NaN	NaN	NaN	S	1	639	LNTFRDEGRVLRRLPSRVPSLRVLRSFFTDG	Arhgap23	Rho GTPase-activating protein 23	Q69ZH9
23.8579	23.1552	23.3242	24.1338	23.8982	23.2362	23.9496	23.8701	23.2561	22.2911	20.4362	23.285	22.2548	22.9158	23.3154	22.3572	24.6869	23.9952	22.5602	23.9943	25.9855	26.5681	23.2158	S	1	643	RDEGRVLRRLPSRVPSLRVLRSFFTDGSLDS	Arhgap23	Rho GTPase-activating protein 23	Q69ZH9
26.0713	25.4062	25.6325	26.497	26.6312	26.8086	27.3199	27.3657	27.6749	29.0929	28.4463	28.5539	27.9887	27.7226	28.8301	27.7445	28.1953	27.9228	27.5418	28.2884	28.5411	28.5423	28.789	S	0.999992	1388	GTADDMLAVRLRRPLSPETRRRRSSWRRHTV	Arhgap23	Rho GTPase-activating protein 23	Q69ZH9
NaN	NaN	NaN	NaN	NaN	NaN	NaN	NaN	23.6884	23.9592	23.1227	24.2586	23.7109	NaN	22.8388	23.7729	23.0017	23.7269	23.4684	NaN	NaN	NaN	23.9982	S	1	515	QLTPARQMNLGFGDESPEPEARGERLGRKVA	Arhgap23	Rho GTPase-activating protein 23	Q69ZH9
NaN	NaN	NaN	NaN	NaN	NaN	NaN	NaN	NaN	NaN	23.8111	24.2627	23.2475	NaN	23.3996	24.6511	21.9158	NaN	23.6922	21.6695	21.7094	25.1751	NaN	S	0.898154	1295	TEGGAGPGGRLSRRPSFSSHHLMPCDTLARR	Arhgap23	Rho GTPase-activating protein 23	Q69ZH9
24.462	25.0887	24.2085	24.0041	25.1051	24.702	24.643	24.9927	25.806	24.6345	25.6052	24.8344	24.3176	25.1757	24.7814	25.1129	24.3844	25.1789	NaN	23.0305	23.913	22.5497	24.1847	S	0.991477	607	HYSQDCSSIKAGRRSSYLLAITTERSKSCDD	Arhgap23	Rho GTPase-activating protein 23	Q69ZH9
26.3522	26.1506	26.3389	25.8998	26.3095	26.4683	26.8927	26.6559	27.4875	25.6387	24.4549	25.2295	27.1987	27.1363	27.3018	23.9421	26.5216	23.4623	23.7462	26.2832	25.8412	26.1753	26.133	S	1	619	RRSSYLLAITTERSKSCDDGLNTFRDEGRVL	Arhgap23	Rho GTPase-activating protein 23	Q69ZH9
26.6172	26.5702	25.0282	25.1434	25.3544	24.9715	25.5898	25.6359	26.1329	25.357	25.0111	25.678	25.659	25.3599	26.0023	24.4096	26.1544	25.9833	25.2621	24.0385	25.5428	25.7269	26.553	S	0.999992	421	LQGLDDIGYIGYRSYSPSFQRRTGLLHALSF	Arhgap23	Rho GTPase-activating protein 23	Q69ZH9
26.4661	26.3297	26.4592	26.2135	26.2076	NaN	26.5595	27.1518	27.402	24.6835	27.5156	28.0159	27.8517	27.5173	26.3602	27.247	27.7326	26.8485	26.0318	20.9552	25.5123	27.3306	26.9499	S	0.831915	550	TEDSLASIPFIDEPTSPSIDLQAKHVPASAV	Arhgap23	Rho GTPase-activating protein 23	Q69ZH9
25.7227	25.5702	25.7509	25.2375	25.605	25.1815	26.0075	25.9443	27.9906	27.8333	27.6724	27.9302	27.3781	27.1742	27.9437	27.6877	27.8165	27.6578	27.4684	27.3242	27.3917	27.8643	27.8996	S	1	10	______MAATDLERVSNAEPEPRSLSLGGHV	2015-09-08	Septin-8	Q8CHH9
23.0925	22.8076	22.5563	22.4966	23.2059	22.9864	23.1396	23.0341	24.3337	23.2088	23.5732	22.9541	23.8458	NaN	24.0997	23.9868	24.4948	23.9616	23.758	NaN	18.6204	23.1303	24.1205	S	0.997275	20	DLERVSNAEPEPRSLSLGGHVGFDSLPDQLV	2015-09-08	Septin-8	Q8CHH9
22.9841	22.1154	NaN	21.8819	22.2572	22.6516	22.9883	22.6449	NaN	24.753	24.5728	24.1458	24.0525	NaN	24.7685	23.426	22.9976	24.2133	23.5362	22.4828	NaN	22.8682	24.5046	S	0.996733	689	TSKGKARPKMGRRKRSAKPETVIDSLLQ___	Kif3a	Kinesin-like protein KIF3A;Kinesin-like protein	P28741
NaN	NaN	NaN	NaN	NaN	NaN	NaN	NaN	26.8442	NaN	25.4303	NaN	25.9981	NaN	27.0291	26.4413	25.1689	NaN	NaN	NaN	25.0528	24.6286	26.4012	S	0.975849	273	KDKERLKQKHKKRPESPPSVLAPPAVPTADK	Mllt6		B1AR09
NaN	NaN	NaN	NaN	NaN	NaN	NaN	NaN	24.4904	25.5037	22.2591	24.5206	NaN	NaN	NaN	23.4011	23.037	NaN	NaN	21.6026	NaN	23.4396	NaN	S	0.886114	370	DKYPKPADPTPPAPPSPTAPEPPKADLFEQK	Mllt6		B1AR09
NaN	NaN	NaN	NaN	NaN	NaN	NaN	NaN	NaN	25.6229	NaN	NaN	NaN	25.7482	24.7504	NaN	NaN	NaN	NaN	NaN	22.6362	NaN	22.5847	S	0.767368	65	VLGRGPGHDRSRDRHSPPSCHLFPPPPPPLP	Chd3		B1AR17
NaN	NaN	NaN	NaN	NaN	NaN	NaN	NaN	25.6173	22.2482	24.5522	24.9484	25.2258	25.7482	24.7504	24.3084	23.026	24.9422	25.5534	NaN	22.6362	NaN	22.8431	S	0.914362	68	RGPGHDRSRDRHSPPSCHLFPPPPPPLPPPP	Chd3		B1AR17
25.4811	24.8172	25.2435	24.7412	25.162	25.344	26.0111	26.1385	28.81	NaN	27.0889	27.6429	27.4214	28.2672	NaN	28.3105	27.3412	27.4694	23.1502	28.1775	28.0045	27.7916	28.4274	S	0.991755	765	YKKKKKELQGDGPPSSPTNDPTVKYETQPRF	Chd3		B1AR17
NaN	NaN	NaN	NaN	NaN	NaN	NaN	NaN	NaN	24.9464	24.1202	23.9367	22.7703	NaN	NaN	NaN	NaN	NaN	NaN	23.7918	21.7411	NaN	NaN	S	1	125	KENKPGKPRKRKKLDSEEEFGSERDEYREKS	Chd3		B1AR17
NaN	NaN	NaN	NaN	NaN	NaN	NaN	NaN	24.5281	NaN	NaN	24.226	NaN	23.539	NaN	24.0161	24.7451	24.39	NaN	22.7845	23.0578	23.2288	NaN	S	0.998663	649	QRKNDMDEPPPLDYGSGEDDGKSDKRKVKDP	Chd3		B1AR17
NaN	NaN	NaN	23.5426	NaN	NaN	24.3703	NaN	27.319	27.1506	26.7116	27.8561	26.4941	26.5379	27.5778	27.113	26.9788	26.294	26.8963	26.4726	26.9859	26.9389	26.6961	S	0.999531	1651	EKNSKVGEKMEAEVDSPSPAPSLGERLEHRK	Chd3		B1AR17
23.4972	24.0522	23.9483	NaN	23.5386	24.2968	NaN	24.0005	27.1284	26.622	25.4436	27.096	26.0617	26.034	26.7554	26.6013	26.6426	25.8137	26.4378	26.1211	25.5562	26.3697	26.1884	S	0.999788	1653	NSKVGEKMEAEVDSPSPAPSLGERLEHRKIL	Chd3		B1AR17
NaN	NaN	NaN	NaN	NaN	NaN	NaN	NaN	27.031	22.6732	24.5607	NaN	25.5602	NaN	25.6524	25.9187	23.542	25.9025	26.3996	26.478	26.3658	27.0331	NaN	S	0.948624	233	LEAFGNAKTIRNDNSSRFGKYIDIHFNKRGA;LEAFGNAKTLRNDNSSRFGKYMDIQFDFQGV;LEAFGNAKTLRNDNSSRFGKYMDVQFDFKGA;LEAFGNAKTNRNDNSSRFGKYMDINFDFKGD;LEAFGNAKTVKNDNSSRFGKFIRINFDIAGY;LEAFGNAKTVKNDNSSRFGKFIRINFDVNGY;LEAFGNAKTVKNDNSSRFGKFIRINFDVTGY;LEAFGNAKTVRNDNSSRFGKFIRIHFGATGK;LEAFGNAKTVRNDNSSRFGKFIRIHFGTTGK;LEAFGNAKTVRNDNSSRFGKFVEIFLEGGVI;LEAFGNAKTVRNDNSSRFGKYMDIEFDFKGD;LESFGNAKTVKNDNSSRFGKFIRINFDVTGY;MESIGNAKTTRNDNS…	Myh13;Myo5a;Myo5b;Myo1h;Myo1b;Myh11;Myh14;Myh3;Myo7a;Myh10;Myo1d;Myh9;Myo15a;Myo1c;Myh4;Myh1;Myh2;Myh8;Myh7b;Myo7b;Myh15;Myo5c;Myo15	Unconventional myosin-Va;Unconventional myosin-Vb;Unconventional myosin-Ih;Unconventional myosin-Ib;Myosin-11;Myosin-14;Myosin-3;Unconventional myosin-VIIa;Myosin-10;Unconventional myosin-Id;Myosin-9;Unconventional myosin-XV;Unconventional myosin-Ic;Myosin-4;Myosin-1;Myosin-8;Myosin-7B;Unconventional myosin-VIIb	Q8VDD5
NaN	NaN	NaN	NaN	NaN	NaN	NaN	NaN	NaN	25.1366	24.0795	NaN	24.0798	24.9839	24.5222	NaN	23.9413	NaN	NaN	NaN	NaN	NaN	NaN	S	0.850418	488	SKQGGRCSPVPGLSSSPSGSPLHGKLTSQDS	Bcas3	Breast carcinoma-amplified sequence 3 homolog	Q8CCN5
NaN	NaN	NaN	NaN	NaN	NaN	NaN	NaN	25.384	24.545	23.8244	25.6732	25.3412	24.9464	24.7784	24.6414	NaN	25.2387	24.9794	24.7138	24.5997	24.9453	24.6085	S	0.956956	823	AVSDRRGVSTVTDAASGTFDRSVTLLEVCGS	Bcas3	Breast carcinoma-amplified sequence 3 homolog	Q8CCN5
NaN	NaN	NaN	NaN	NaN	NaN	NaN	NaN	NaN	24.5497	24.1645	25.2936	25.358	25.0181	25.1815	24.8039	23.9016	23.967	24.8058	23.8478	24.0002	25.349	25.1378	S	0.958967	869	SEEGLRERLADAMAESPSRDVVGSGTDTALD	Bcas3		B1AR74
NaN	NaN	NaN	NaN	NaN	NaN	NaN	NaN	NaN	NaN	22.474	22.8386	23.1109	NaN	22.4681	NaN	22.4986	22.7961	NaN	NaN	NaN	22.4946	22.904	S	0.783287	503	SPSGSPLHGKLTSQDSYNNFTNNNPGNPRLS	Bcas3	Breast carcinoma-amplified sequence 3 homolog	Q8CCN5
NaN	NaN	NaN	NaN	NaN	NaN	NaN	23.2772	NaN	NaN	NaN	NaN	NaN	NaN	NaN	NaN	NaN	NaN	NaN	NaN	NaN	NaN	NaN	S	1	838	SGTFDRSVTLLEVCGSWPEGFGLRHMSSMEH	Bcas3	Breast carcinoma-amplified sequence 3 homolog	Q8CCN5
NaN	NaN	20.8443	NaN	21.4172	21.8044	NaN	22.1364	23.7375	23.1833	23.3089	23.1793	23.166	23.4558	22.5	23.2652	23.4257	23.2259	23.4382	23.1466	22.8999	23.7692	23.7627	S	0.999987	2	______________MSFLVSKPERIRRWVSE	Strada	STE20-related kinase adapter protein alpha	Q3UUJ4
NaN	NaN	NaN	NaN	NaN	NaN	NaN	NaN	23.0764	NaN	23.0615	22.1785	22.8783	NaN	22.7604	23.6715	23.0673	23.1793	23.3703	NaN	NaN	NaN	NaN	S	0.98827	1037	SFDIPTGSLRDSRAQSPVSGPNVAFQTDVTT	Vps13d		B1ART1
NaN	23.2509	23.4201	22.8955	22.9186	23.1752	23.6604	23.8597	NaN	25.4012	24.5691	NaN	25.098	24.5085	24.0883	24.0486	NaN	NaN	24.9552	NaN	22.2767	24.1043	NaN	S	0.967314	2074	PGTFSLQDKESVPSASPAGTPKHSMRKMTTT	Vps13d		B1ART1
NaN	NaN	NaN	NaN	NaN	NaN	NaN	NaN	NaN	23.5844	22.3437	24.0111	NaN	NaN	NaN	NaN	NaN	NaN	NaN	22.981	22.9877	23.1778	NaN	S	0.780297	1694	KYKSLMVSRGAPKPSSLAQKEYLSQSCPSVS	Vps13d		B1ART1
NaN	NaN	23.2465	23.4406	24.2185	23.9814	23.8375	NaN	24.6937	24.6057	25.068	25.4577	25.9213	25.6159	26.3695	NaN	23.2096	24.8162	26.3258	25.3621	27.5491	25.8494	23.4133	S	0.996897	2429	DIKKQNVTPARHRNASSESAVVPKTVKSGVV	Vps13d		B1ART1
NaN	NaN	NaN	NaN	NaN	NaN	NaN	NaN	24.5353	25.2732	24.9156	24.2591	24.7457	24.018	24.4133	23.3095	23.2598	24.1386	24.0722	22.1387	21.7542	NaN	24.2932	S	0.998157	1033	HKNLSFDIPTGSLRDSRAQSPVSGPNVAFQT	Vps13d		B1ART1
23.8357	23.8755	23.6839	23.8401	24.2917	NaN	NaN	NaN	27.7961	27.2089	27.1862	27.2592	27.1159	27.1093	26.2924	27.2722	27.1547	27.0875	26.8953	26.6007	26.6312	27.3564	27.4885	S	1	4477	QAESNKAFLAELEQNSPKIQKVKEALAGLLK	Macf1	Microtubule-actin cross-linking factor 1	E9QA63
24.5021	24.2368	23.7075	25.7539	25.2315	25.6768	25.2382	25.2394	26.6094	NaN	22.0377	NaN	NaN	23.7731	22.4865	22.4997	23.5984	23.7049	26.5297	22.4013	23.9649	23.3348	NaN	S	1	1367	LQLMTYKAFVESQQKSPGKRRRMISSSDAIT	Macf1	Microtubule-actin cross-linking factor 1	E9QA63
24.2456	22.7564	NaN	24.4681	24.0937	24.3171	24.7908	25.3793	24.5261	27.5991	27.2425	28.0864	26.765	26.2489	27.7122	27.1536	27.3762	26.8578	26.5262	26.5567	27.2068	27.5412	27.513	S	0.997068	4452	LESKEEVLKAMDATLSPTKTETVKAQAESNK	Macf1	Microtubule-actin cross-linking factor 1	E9QA63
NaN	NaN	NaN	NaN	NaN	NaN	NaN	NaN	22.9791	25.9678	25.0792	26.5491	25.3141	25.5441	26.3566	25.8726	25.298	25.9151	25.3596	21.8323	21.2681	NaN	25.0809	S	1	2968	GGEQSVQMSREAAVLSEEELDQEVTIGDEPD	Macf1		E9QA63
NaN	NaN	NaN	24.8299	24.1008	24.424	23.8427	24.1268	26.5193	NaN	27.6556	26.9178	26.9988	NaN	27.0345	27.9138	27.9087	27.7596	27.6669	26.1385	26.9254	26.631	26.9871	S	0.998291	5548	WLREAEEELAASGGQSPTGEQIPQFQQRQKE	Macf1	Microtubule-actin cross-linking factor 1	E9QA63
22.1687	22.074	23.3492	NaN	23.9576	23.08	23.4881	23.3805	NaN	NaN	NaN	20.4686	NaN	NaN	NaN	NaN	NaN	NaN	NaN	22.2032	NaN	22.1428	NaN	S	1	1500	IKTSQIFLAKHGHKLSEGEKEQISEQLRVLN	Macf1	Microtubule-actin cross-linking factor 1	E9QA63
NaN	NaN	NaN	NaN	NaN	NaN	NaN	NaN	NaN	27.9688	25.5089	25.2389	NaN	25.3331	25.1105	NaN	NaN	NaN	NaN	NaN	NaN	NaN	26.5423	S	0.853091	7242	SSGSKLKRPTPAFHSSRTSLAGDTSNSSSPA	Macf1	Microtubule-actin cross-linking factor 1	E9QA63
24.7096	NaN	24.0802	24.2049	23.7552	24.2834	24.2359	24.5509	25.0948	NaN	26.8264	27.0029	26.0042	26.872	27.1363	26.7814	26.3678	26.4823	26.8135	26.0229	25.9611	26.6729	26.1483	S	1	280	LGVTRLLDAEDVDVPSPDEKSVITYVSSIYD	Macf1	Microtubule-actin cross-linking factor 1	E9QA63
NaN	NaN	NaN	NaN	NaN	NaN	NaN	NaN	NaN	24.301	NaN	24.6297	23.5101	23.6887	24.1916	NaN	NaN	NaN	24.293	24.0518	23.1927	22.793	23.8927	S	1	3085	LSSEIPRPERLNSQESDEEPQISDVPHISKG	Macf1	Microtubule-actin cross-linking factor 1	E9QA63
NaN	NaN	NaN	NaN	NaN	NaN	NaN	NaN	23.5051	23.3659	23.102	23.9199	22.021	23.0876	22.4864	23.0888	22.7955	22.7709	21.7049	NaN	21.564	22.4873	22.0254	S	0.990819	1376	VESQQKSPGKRRRMISSSDAITQEFMDLRTR	Macf1	Microtubule-actin cross-linking factor 1	E9QA63
25.2849	24.9796	25.4524	25.4458	25.0891	25.6085	25.9407	26.0401	27.4099	27.3464	27.3711	27.1589	27.5502	26.6245	27.2223	27.0027	26.4175	27.2598	27.2647	27.4624	26.8393	28.5077	27.9134	S	0.999212	3883	GSSPEALNSLLKRQGSFSEDVISHKGDLRFV	Macf1	Microtubule-actin cross-linking factor 1	E9QA63
NaN	NaN	NaN	NaN	NaN	28.6399	24.7945	NaN	NaN	NaN	NaN	NaN	NaN	NaN	NaN	NaN	NaN	NaN	NaN	NaN	NaN	NaN	NaN	S	0.859855	3885	SPEALNSLLKRQGSFSEDVISHKGDLRFVTI	Macf1	Microtubule-actin cross-linking factor 1	E9QA63
NaN	NaN	NaN	NaN	NaN	NaN	NaN	NaN	NaN	25.8564	25.8469	25.0116	25.7215	25.2353	25.748	24.7246	25.6074	24.6628	25.5281	23.3007	23.8839	NaN	25.1092	S	0.987653	7293	RAGSRAGSRASSRRGSDASDFDLLETQSACS	Macf1	Microtubule-actin cross-linking factor 1	E9QA63
NaN	NaN	NaN	NaN	NaN	NaN	NaN	NaN	23.9787	NaN	22.8836	23.1099	NaN	23.272	22.8515	23.311	NaN	NaN	NaN	23.1823	22.1353	23.2048	21.9366	S	0.999966	6901	KQPDVDRVTKTYKRKSVEPTHAPFMEKSRSG	Macf1	Microtubule-actin cross-linking factor 1	E9QA63
NaN	NaN	NaN	NaN	NaN	NaN	NaN	NaN	26.4634	24.9936	25.7421	26.3606	23.346	26.0307	26.1955	26.449	24.7456	25.2993	25.8543	25.7739	25.0526	25.9766	25.3943	S	0.998979	4608	LNEAAQGILTGPGDMSPSASQVHKDLQSISQ	Macf1	Microtubule-actin cross-linking factor 1	E9QA63
NaN	NaN	NaN	NaN	NaN	NaN	NaN	NaN	NaN	26.0092	26.3196	26.229	27.0749	26.0143	27.0444	26.0753	26.1009	26.4234	26.3847	26.2231	26.3004	26.4606	NaN	S	1	4692	PEAVKQQLEETSEIRSDLGQLDNEIKEAQTL	Macf1	Microtubule-actin cross-linking factor 1	E9QA63
NaN	NaN	NaN	NaN	NaN	NaN	NaN	NaN	NaN	24.28	24.177	24.561	23.6892	23.8751	24.2799	24.442	24.1784	NaN	23.6594	22.4911	23.2991	22.5816	24.0749	S	0.999702	6920	THAPFMEKSRSGSRKSLNQPTPPPMPILSQS	Macf1	Microtubule-actin cross-linking factor 1	E9QA63
NaN	NaN	NaN	NaN	NaN	NaN	NaN	NaN	24.3088	24.2824	24.7525	25.1071	24.9805	23.4329	25.2884	24.9453	25.3461	25.6108	23.8748	24.2747	24.6152	24.6382	25.7371	S	0.883718	4123	LANNMKLKQDIARQKSSLEATHDMVTRFMET	Macf1	Microtubule-actin cross-linking factor 1	E9QA63
NaN	NaN	NaN	NaN	NaN	NaN	NaN	NaN	NaN	NaN	NaN	23.6876	NaN	24.5277	24.005	24.6476	24.9207	24.9395	23.7709	NaN	24.6152	24.6678	25.0937	S	0.902892	4124	ANNMKLKQDIARQKSSLEATHDMVTRFMETA	Macf1	Microtubule-actin cross-linking factor 1	E9QA63
NaN	NaN	NaN	NaN	NaN	NaN	NaN	NaN	24.7888	24.0775	23.16	23.4244	23.8805	23.873	23.1067	23.9961	22.9381	NaN	23.6638	21.8977	NaN	22.5849	23.9927	S	1	5	___________MGEHSPDDNIIFFKGEEDDL	Mtf1	Metal regulatory transcription factor 1	Q07243
NaN	NaN	NaN	NaN	NaN	NaN	NaN	NaN	25.4344	27.4872	26.3521	26.6101	25.4271	25.0124	26.2973	26.0958	25.82	26.1009	24.9656	25.0923	25.1464	24.2298	27.2275	S	1	347	NGSLGSGDIDGLPKNSPNNISGISNPPGTPR	Ssbp3	Single-stranded DNA-binding protein 3	Q9D032
NaN	NaN	NaN	NaN	NaN	NaN	NaN	NaN	24.2058	24.9653	25.2136	NaN	NaN	NaN	21.3847	24.7846	23.0814	23.0972	NaN	NaN	21.4663	21.8463	NaN	S	0.865556	399	LMKHMSKHTVVEHLVSHHSPQRTESPGIPVR	Zfp362		B1ASA5
23.4292	23.8335	23.856	23.3793	25.036	24.9054	24.5523	21.617	23.615	25.3769	24.4891	23.2469	NaN	25.4277	24.0955	NaN	NaN	22.6031	26.1814	NaN	NaN	NaN	20.7568	S	0.999761	402	HMSKHTVVEHLVSHHSPQRTESPGIPVRISL	Zfp362		B1ASA5
22.8043	20.4493	22.4837	NaN	NaN	NaN	23.7407	NaN	NaN	23.4994	22.9374	23.6069	23.4285	23.2218	24.1104	NaN	22.5593	22.3415	23.517	NaN	21.5012	NaN	23.9528	S	0.999998	408	VVEHLVSHHSPQRTESPGIPVRISLI_____	Zfp362		B1ASA5
23.3309	22.764	23.4668	22.1996	23.765	NaN	23.5765	23.6329	25.6168	26.204	25.3622	25.8706	25.6141	25.215	25.7677	24.8706	24.3782	NaN	24.6434	24.4002	25.0518	25.905	25.8805	S	0.983889	158	PSTPTTTSQSRLIASSPTLISGITSPPLLDS	Zfp362		B1ASA5
NaN	NaN	NaN	NaN	NaN	NaN	NaN	NaN	NaN	NaN	22.0318	22.8554	23.7232	22.6961	24.2733	23.5851	23.8665	24.1	21.948	NaN	NaN	23.6288	23.1856	S	1	26	RRQELLEARFTGVGVSKGPLNSESSNQSLCS	Tlk2	Serine/threonine-protein kinase tousled-like 2	O55047-2
NaN	NaN	23.6186	23.0959	23.8199	23.4844	23.9712	23.7099	25.27	24.6592	25.1108	24.8421	25.235	24.5665	24.7852	23.9571	23.9373	23.7177	24.7103	23.4413	24.0815	24.0616	24.8063	S	0.981638	99	ISDYFEFAGGSGPGTSPGRSVPPVARSSPQH	Tlk2	Serine/threonine-protein kinase tousled-like 2	O55047-2
NaN	NaN	NaN	NaN	NaN	NaN	NaN	NaN	NaN	25.1151	24.3162	23.5463	23.0678	23.5206	22.9818	NaN	NaN	23.9989	NaN	22.2676	22.703	22.4636	NaN	S	0.857264	852	SKDKADFAVVAGDEASPTTGGSSGENEGTAG	Lig3	DNA ligase 3;DNA ligase	P97386
NaN	NaN	NaN	NaN	NaN	NaN	NaN	NaN	24.4055	26.56	25.3341	26.2631	23.8333	24.2871	25.6978	25.1431	24.8612	24.9905	23.6565	24.3813	24.6722	23.2706	26.7149	S	0.996366	244	GFSAAKPNNSEQAPSSPAPGTSLSASKCDPK	Lig3	DNA ligase 3;DNA ligase	P97386
21.94	22.9735	23.2138	23.4472	24.514	23.8252	23.8926	24.2828	19.2465	25.7281	23.779	25.3277	NaN	24.2742	25.4069	23.9459	24.0565	24.5952	23.6638	20.8144	25.0773	26.4817	NaN	S	1	906	NSPSSRGGIKPIPKHSPMKPGEKLAVKSSPV	Lig3	DNA ligase 3;DNA ligase	P97386
25.3765	NaN	NaN	26.0655	26.1427	26.3418	26.8391	26.7581	27.4987	NaN	NaN	NaN	NaN	23.1152	NaN	NaN	NaN	NaN	NaN	NaN	NaN	23.3005	20.0963	S	0.898766	918	PKHSPMKPGEKLAVKSSPVKVGMKRKATDET	Lig3	DNA ligase 3;DNA ligase	P97386
NaN	25.0141	NaN	NaN	NaN	NaN	26.8391	NaN	27.4987	NaN	NaN	NaN	NaN	23.1152	NaN	NaN	NaN	NaN	26.465	NaN	NaN	23.3005	20.0963	S	0.75524	919	KHSPMKPGEKLAVKSSPVKVGMKRKATDETP	Lig3	DNA ligase 3;DNA ligase	P97386
28.471	28.5184	27.4095	28.489	28.6867	28.7626	29.5519	29.683	30.2675	29.6315	29.3288	28.7745	29.6334	28.9894	29.9686	29.5841	29.7994	29.2416	30.1355	27.6552	29.0363	29.904	29.4883	S	0.985033	211	KAAVQAKLTTTGQVTSPVKGASFITSTNPRK	Lig3	DNA ligase 3;DNA ligase	P97386
NaN	NaN	NaN	NaN	NaN	NaN	NaN	NaN	23.6672	23.6852	22.1585	24.6526	24.2558	NaN	24.6128	23.2137	NaN	23.5026	23.6947	23.4744	22.9609	24.157	24.2336	S	0.912948	6	__________MEANGSPGTSGSANDSQHDPG	Msi2	RNA-binding protein Musashi homolog 2	Q920Q6
25.6698	25.8911	26.1396	25.7779	25.8569	25.7348	25.9249	26.0907	26.2435	23.7811	22.4427	24.1582	24.3376	22.5919	NaN	23.357	NaN	23.5757	27.2032	NaN	NaN	23.3296	NaN	S	1	215	GEAQCTELDMDDGRHSPPMVKNATVHPGLEL	Prpsap1	Phosphoribosyl pyrophosphate synthase-associated protein 1	Q9D0M1
NaN	NaN	NaN	NaN	NaN	NaN	NaN	NaN	25.5838	NaN	23.2213	24.3809	NaN	24.2572	NaN	NaN	NaN	NaN	NaN	23.5827	24.2304	24.6183	NaN	S	1	177	QEEIPNYRNAVIVAKSPDAAKRAQSYAERLR	Prpsap1	Phosphoribosyl pyrophosphate synthase-associated protein 1	Q9D0M1
29.0813	28.7628	29.0249	29.9379	29.037	29.7295	29.9017	30.138	23.9399	28.5048	28.7301	27.9629	28.3581	28.2811	29.8571	27.3827	28.4237	28.6511	28.6493	28.3239	27.9307	28.5474	28.8146	S	0.945473	225	LAYLPVGTVASKRPASTLVQKGPVDTHLVPL	Sphk1	Sphingosine kinase 1	Q8CI15
NaN	NaN	NaN	NaN	NaN	NaN	NaN	NaN	24.227	24.0516	23.3019	24.2758	24.1197	NaN	23.2247	22.7776	23.9273	NaN	24.2626	23.2133	23.6733	NaN	23.4909	S	0.99998	119	LTSLNSAQAAGPAGASPPPLPGAGAQQHPSK	Tnrc6c		B1ATC3
24.4384	NaN	NaN	NaN	NaN	NaN	23.8146	24.3277	25.6	22.2278	25.2254	25.2935	25.0979	24.8535	25.2865	24.7413	24.6825	24.5157	23.3543	NaN	22.7126	24.6045	23.6481	S	0.832041	1882	SLWGPPSAEDARVIGSPTPLNTLLPGDLLSG	Tnrc6c	Trinucleotide repeat-containing gene 6C protein	B1ATC3
NaN	NaN	NaN	21.7034	22.3331	NaN	21.5306	21.8357	NaN	NaN	NaN	NaN	NaN	NaN	NaN	NaN	NaN	NaN	NaN	NaN	NaN	NaN	NaN	S	1	8	________MDEEMRHSLECIQANQIFPRKQL	Mtmr3	Myotubularin-related protein 3	Q8K296
25.457	24.7379	NaN	25.8585	26.189	26.1203	26.7099	26.6703	29.0212	28.6704	28.4181	29.056	28.6916	27.9026	29.2286	28.6245	28.6342	28.8771	28.6385	28.4946	29.1171	29.0984	29.4157	S	0.97288	633	TTTCENMVPLASRRSSDPSLNEKWQEHGRSL	Mtmr3	Myotubularin-related protein 3	Q8K296
NaN	24.5789	NaN	NaN	NaN	NaN	NaN	25.102	NaN	NaN	NaN	NaN	NaN	NaN	NaN	NaN	NaN	NaN	NaN	NaN	NaN	NaN	NaN	S	0.753387	613	TSPDEPPLSRLPKTRSFDNLTTTCENMVPLA	Mtmr3	Myotubularin-related protein 3	Q8K296
NaN	NaN	NaN	NaN	NaN	NaN	NaN	NaN	NaN	NaN	NaN	23.515	21.2546	21.5632	23.1223	NaN	NaN	NaN	22.806	NaN	22.6229	23.8321	22.4073	S	0.775575	97	TPAHPPETAHMSLRKSTGDSQNLGSSSPGRK	Gas7	Growth arrest-specific protein 7	Q60780
NaN	NaN	NaN	NaN	NaN	NaN	NaN	NaN	27.7274	26.4287	25.4274	26.3454	25.9072	26.7222	27.3782	25.6983	27.2932	26.9027	27.0467	25.9646	25.7222	26.5288	27.143	S	1	797	ELRLVRAALLTQQADSPEDREPQQKRAHTDE	Elac2	Zinc phosphodiesterase ELAC protein 2	Q80Y81
25.1923	25.3711	25.7371	26.0304	26.9915	26.2909	27.2752	26.5167	NaN	26.2296	24.9466	25.3545	24.9899	26.3754	25.8239	25.6862	24.8514	25.9195	26.1028	24.6014	25.4437	26.1994	26.1798	S	1	815	DREPQQKRAHTDEPHSPQSKKESVANTLGAR	Elac2	Zinc phosphodiesterase ELAC protein 2	Q80Y81
22.7016	21.7084	21.8147	24.1514	23.1396	NaN	23.3987	23.9965	NaN	NaN	22.23	23.0051	NaN	NaN	24.0355	NaN	NaN	NaN	NaN	21.1692	NaN	NaN	24.4913	S	0.958936	745	PAHSRHSSPSGHLSHSRSSSKGSVEEMMSQP	Tex2	Testis-expressed sequence 2 protein	Q6ZPJ0
23.992	23.5253	24.0499	23.5578	23.0256	22.9584	23.5683	23.3636	22.1447	22.3039	22.92	21.2358	21.106	NaN	NaN	19.8031	19.3656	20.1825	NaN	NaN	19.9615	23.3525	NaN	S	1	294	VPEMEAKIEDTKRRLSEVIYEPFQLLSKIIG	Tex2	Testis-expressed sequence 2 protein	Q6ZPJ0
NaN	NaN	NaN	NaN	NaN	NaN	NaN	NaN	25.0819	24.47	24.0432	24.3473	24.4821	24.266	23.1411	24.7834	23.5811	24.7297	24.7233	24.3694	23.5167	24.4798	24.7329	S	0.998981	115	GLGLSPEEKQRRAIASATEGGSVPQIRAPSH	Aifm1	Apoptosis-inducing factor 1, mitochondrial	Q9Z0X1
NaN	NaN	NaN	NaN	NaN	NaN	NaN	NaN	24.8647	24.7864	24.7424	25.1503	24.4344	24.1086	25.116	24.5649	24.9788	23.6087	24.8278	24.0687	24.4495	24.6097	24.7595	S	0.926297	617	KRMAVLHEQMKEAEGSFTEYEKEIEELKELL	Nasp	Nuclear autoantigenic sperm protein	Q99MD9
NaN	NaN	NaN	NaN	NaN	NaN	NaN	NaN	23.3494	25.0017	25.1084	25.1152	23.9613	23.7324	24.5654	24.7979	24.7231	24.7754	23.8413	24.1872	24.3897	24.0146	24.7542	S	1	188	QESEVEKGGREDMDISEPEEKLQETVEPTSK	Nasp	Nuclear autoantigenic sperm protein	Q99MD9
NaN	NaN	NaN	NaN	NaN	NaN	NaN	NaN	NaN	NaN	22.8986	24.7207	25.3525	NaN	25.6666	25.6113	25.8923	NaN	25.0383	NaN	NaN	NaN	25.5357	S	1	712	DISHLVRKKRKPEEESPRKDDAKKAKQEPEV	Nasp	Nuclear autoantigenic sperm protein	Q99MD9
NaN	NaN	NaN	NaN	NaN	NaN	NaN	NaN	NaN	23.4174	22.6194	23.8785	NaN	NaN	NaN	NaN	NaN	NaN	NaN	22.4482	NaN	NaN	NaN	S	0.996041	175	EGKSLTKPETDKEQESEVEKGGREDMDISEP	Nasp	Nuclear autoantigenic sperm protein	Q99MD9
NaN	NaN	NaN	NaN	NaN	NaN	NaN	NaN	24.7862	25.2077	24.2564	NaN	23.4289	NaN	23.4558	23.7967	24.951	23.8288	NaN	NaN	24.1399	24.0398	NaN	S	0.862639	42	SATLKRGGKKCAVPHSSPNLAEVKKKGKMKK	Hdac6	Histone deacetylase 6	Q9Z2V5
NaN	NaN	NaN	NaN	24.3797	NaN	24.9945	24.7456	25.114	25.8672	25.4103	25.2836	23.853	24.9446	24.5735	20.5288	24.4383	NaN	25.1804	24.0013	24.3077	25.6843	NaN	S	0.97208	43	ATLKRGGKKCAVPHSSPNLAEVKKKGKMKKL	Hdac6	Histone deacetylase 6	Q9Z2V5
24.0044	23.4837	22.5159	NaN	23.7529	24.1459	23.7238	24.0359	25.6693	NaN	26.046	25.8489	25.147	24.7537	25.3207	23.3859	24.4638	24.1476	24.9764	25.4323	25.3969	24.0825	24.0763	S	1	21	QDSSTRQRKSRHNPQSPLQESSATLKRGGKK	Hdac6	Histone deacetylase 6	Q9Z2V5
NaN	NaN	NaN	NaN	NaN	NaN	NaN	NaN	NaN	23.9532	25.0801	23.4128	NaN	23.9389	NaN	NaN	20.7	NaN	NaN	21.9476	22.6855	NaN	NaN	S	0.999985	59	PNLAEVKKKGKMKKLSQPAEEDLVVGLQGLD	Hdac6	Histone deacetylase 6	Q9Z2V5
NaN	NaN	NaN	NaN	NaN	NaN	NaN	NaN	24.6175	NaN	NaN	NaN	NaN	24.794	24.4373	NaN	NaN	23.2315	24.4228	NaN	NaN	NaN	NaN	S	0.862431	383	AFTQHHRPVITGPRASPHATPSTLHFPTSPI	Nfia	Nuclear factor 1 A-type;Nuclear factor 1	Q02780
NaN	NaN	NaN	NaN	NaN	NaN	NaN	NaN	NaN	NaN	NaN	NaN	NaN	NaN	NaN	NaN	NaN	NaN	NaN	NaN	NaN	23.9771	NaN	S	0.805805	396	RASPHATPSTLHFPTSPIIQQPGPYFSHPAI	Nfia	Nuclear factor 1 A-type;Nuclear factor 1	Q02780
NaN	NaN	NaN	NaN	NaN	NaN	NaN	NaN	NaN	25.4826	23.8835	NaN	NaN	NaN	NaN	22.3901	NaN	21.8561	NaN	22.313	22.5877	23.9798	NaN	S	0.991164	323	MDSPGEEPFYTGQGRSPGSGSQSSGWHEVEP	Nfia	Nuclear factor 1 A-type;Nuclear factor 1	Q02780
NaN	NaN	NaN	NaN	NaN	NaN	NaN	NaN	NaN	NaN	22.7731	NaN	NaN	NaN	22.9784	22.1208	22.8479	23.942	NaN	NaN	21.0098	NaN	NaN	S	0.810984	281	NFSLSDLESSSYYSMSPGAMRRSLPSTSSTS	Nfia	Nuclear factor 1 A-type;Nuclear factor 1	Q02780
NaN	NaN	NaN	NaN	NaN	NaN	NaN	NaN	23.8126	24.11	NaN	NaN	NaN	NaN	22.0302	21.9826	NaN	NaN	23.6334	NaN	NaN	NaN	23.3166	S	0.985853	131	PRPSSISAGSEAGDWSPRKLQSSASTFLSPA	Irak1	Interleukin-1 receptor-associated kinase 1	Q8BR10
NaN	NaN	NaN	NaN	NaN	NaN	NaN	NaN	25.095	NaN	22.9158	NaN	NaN	NaN	24.5607	24.1878	24.6849	NaN	NaN	22.9293	NaN	NaN	24.7892	S	0.97118	186	LPSSAPSSTKQSSPESPVSGLQRAHPSPFCW	Irak1		Q8BR10
NaN	NaN	NaN	NaN	NaN	NaN	NaN	NaN	24.2489	25.4078	25.1487	24.8705	24.2441	24.2774	24.7331	22.9834	25.0458	NaN	NaN	22.9944	24.3859	24.1692	24.2625	S	0.991929	205	SGEACREEKGLAAEDSGGDSKDLSEVSETTE	Naa10	N-alpha-acetyltransferase 10	Q9QY36
25.7889	25.2572	25.7899	25.9989	26.1937	26.1327	26.3054	26.519	26.6317	26.5595	26.1269	25.804	25.5594	25.5467	25.2794	26.5714	26.8676	26.482	26.6796	25.2482	26.2239	26.0686	26.6986	S	0.993864	96	NIIDRFQKASVSGPNSPSETRRERAFDANTM	Mid1	E3 ubiquitin-protein ligase Midline-1	O70583
NaN	NaN	NaN	NaN	NaN	NaN	NaN	NaN	NaN	26.5793	25.2341	25.0421	25.0888	NaN	23.6913	25.1657	25.1345	25.3613	NaN	23.6093	23.376	24.5652	26.7586	S	1	7	_________MAEAEDSPGEQEAAASKPLFAG	Yipf6	Protein YIPF6;Protein YIPF	Q8BR70
23.1515	22.5138	22.8109	23.4386	23.9552	23.9005	23.9191	24.5645	24.672	24.401	24.2114	24.8381	24.713	23.8412	24.6746	23.3608	24.9212	24.6967	24.8382	24.2478	24.7439	24.1988	24.6614	S	0.994053	116	NIIDRFQKASVSGPNSPSESRRERTYRPSSA	Mid2	Probable E3 ubiquitin-protein ligase MID2	Q9QUS6
23.4395	22.3959	23.2945	22.9001	23.7419	23.6816	24.2128	23.7132	25.6521	26.279	25.1511	25.6869	NaN	25.8335	25.7866	25.6132	25.3802	25.2924	24.8517	25.6534	24.5455	NaN	25.1663	S	0.999994	556	QEAKMELKRRLSRKLSLRPTVAELQARRILR	Phactr2	Phosphatase and actin regulator	B1AVN8
NaN	NaN	NaN	NaN	25.6509	24.8522	24.8417	24.7804	27.6243	26.9166	25.3935	27.8081	25.8085	25.0719	27.8566	27.4499	27.8817	27.9298	NaN	26.2769	26.9207	27.5515	25.2328	S	0.99996	518	QELRQQIGTKLVRRLSQRPTTEELEQRNILK	Phactr2	Phosphatase and actin regulator	B1AVN8
25.1382	25.2724	25.0595	25.0475	24.9864	24.9424	25.3896	24.8893	NaN	24.1902	23.3623	25.0555	NaN	22.999	NaN	NaN	NaN	NaN	NaN	22.1144	NaN	NaN	21.1647	S	0.999635	74	SASSRGRPLRVHISGSVDGLDKASIANSDGP	Phactr2	Phosphatase and actin regulator	B1AVN8
NaN	NaN	NaN	NaN	NaN	NaN	NaN	NaN	NaN	NaN	22.4284	NaN	NaN	NaN	NaN	NaN	NaN	NaN	NaN	22.5462	24.6452	24.1348	NaN	S	0.999726	91	HMAQQESPYRVSHPKSPGQPLRNSSRTQAST	Gemin8	Gem-associated protein 8	Q8BHE1
NaN	NaN	NaN	NaN	NaN	NaN	NaN	NaN	NaN	24.443	NaN	23.0917	NaN	23.0788	22.726	22.5735	23.4862	23.4503	NaN	21.8913	NaN	NaN	NaN	S	1	662	VQRQIRKQEESLKRRSFHIENKLKDLLAEKE	Kif16b	Kinesin-like protein KIF16B	B1AVY7
NaN	NaN	NaN	NaN	NaN	NaN	NaN	NaN	22.8587	23.6927	23.3822	23.8384	23.727	22.8978	23.9071	23.209	23.2527	22.5	NaN	22.5147	21.901	23.0589	23.6204	S	0.999609	582	GLLSSFSLSMTDLSKSCENLSAVMLYNPGLE	Kif16b	Kinesin-like protein KIF16B	B1AVY7
NaN	NaN	NaN	NaN	NaN	NaN	NaN	NaN	22.7871	23.5692	NaN	20.8609	NaN	NaN	21.0218	22.9797	20.694	21.3498	NaN	20.5272	18.8239	21.5815	22.3187	S	0.94868	566	FNHPKEAAKLREKRKSGLLSSFSLSMTDLSK	Kif16b	Kinesin-like protein KIF16B	B1AVY7
NaN	NaN	NaN	NaN	NaN	NaN	NaN	NaN	NaN	NaN	NaN	21.9433	22.1545	NaN	NaN	NaN	NaN	NaN	NaN	NaN	NaN	NaN	NaN	S	0.852459	575	LREKRKSGLLSSFSLSMTDLSKSCENLSAVM	Kif16b	Kinesin-like protein KIF16B	B1AVY7
20.4089	NaN	21.2757	21.6614	22.0328	NaN	21.7736	22.5021	NaN	NaN	NaN	NaN	NaN	NaN	NaN	NaN	NaN	NaN	NaN	NaN	NaN	NaN	NaN	S	0.983947	398	LKTLLAQGNQIALLDSPTALSMEEKLHQNEA	Kif16b	Kinesin-like protein KIF16B	B1AVY7
NaN	NaN	NaN	NaN	NaN	NaN	NaN	NaN	24.5532	NaN	25.1847	24.2749	22.7796	23.9686	NaN	22.8813	NaN	22.7675	NaN	NaN	NaN	NaN	NaN	S	0.958941	23	PDSMPCHNRQVNSTSSPSPEHLLAEDRVLDH	Uprt	Uracil phosphoribosyltransferase homolog	B1AVZ0
NaN	23.1716	NaN	NaN	NaN	NaN	NaN	NaN	NaN	26.6733	NaN	26.0902	24.9814	NaN	25.0612	25.1492	25.8234	NaN	25.9553	24.8264	25.073	24.1087	NaN	S	0.983401	25	SMPCHNRQVNSTSSPSPEHLLAEDRVLDHAE	Uprt	Uracil phosphoribosyltransferase homolog	B1AVZ0
21.6424	21.3905	22.4518	22.4587	22.5021	22.0273	21.9364	21.9116	NaN	NaN	NaN	NaN	NaN	NaN	NaN	NaN	NaN	NaN	NaN	NaN	NaN	NaN	NaN	S	1	72	AGKVTEPISRHRRNHSQHVLKDVIPPLEHPM	Arhgap15	Rho GTPase-activating protein 15	Q811M1
NaN	NaN	NaN	NaN	NaN	NaN	NaN	NaN	NaN	24.828	24.1049	24.9392	23.1592	25.0395	23.4451	NaN	24.0486	22.381	24.7654	NaN	23.8835	24.5019	24.456	S	0.826079	174	NRAAEEAFVNDIDESSPGTEWERVARLCDFN	Clta	Clathrin light chain A	B1AWE0
23.1107	22.7584	23.2111	23.4757	23.0838	23.4456	23.555	23.0261	25.9119	25.4393	23.6146	24.863	25.0253	24.4522	25.7813	24.9943	24.1599	NaN	25.2628	24.3857	23.568	21.3524	25.3455	S	1	103	PTDSYAAISEVDRLQSEPESIRKWREEQTER	Clta	Clathrin light chain A	B1AWE0
22.8095	23.1023	22.7004	22.4437	23.1161	22.7911	23.3346	23.3042	NaN	NaN	NaN	NaN	NaN	NaN	NaN	NaN	NaN	NaN	NaN	NaN	NaN	NaN	NaN	S	1	204	NPKSSKQAKDVSRMRSVLISLKQAPLVH___	Clta	Clathrin light chain A	B1AWE0
NaN	NaN	NaN	NaN	NaN	NaN	NaN	NaN	24.2625	21.9604	24.2119	24.2886	25.2039	NaN	25.7578	23.5123	24.2265	24.2621	NaN	25.4175	25.3156	25.0455	24.2186	S	0.997249	523	HKGAGSRLTLSLRGSSYGSLMTAHGKYQIFA	Npr2	Atrial natriuretic peptide receptor 2;Guanylate cyclase	Q6VVW5
NaN	23.394	23.8553	23.8134	NaN	NaN	NaN	23.9221	25.219	26.1717	25.9125	25.7911	NaN	25.3498	25.5214	24.4253	25.6578	24.9423	24.8121	NaN	25.1302	24.9544	25.0885	S	1	1440	PLPEQEAECPEDARLSPEKSIHLASANPAIS	Zfp462		B1AWL2
NaN	NaN	NaN	NaN	NaN	NaN	NaN	NaN	24.3433	23.8457	24.1445	24.1889	23.2968	23.6214	23.5804	22.7271	23.8576	23.621	23.9126	22.337	23.891	24.0883	23.6707	S	1	1083	GSALSQLSFEVGAPMSPKMSNMGSPPPPQPP	Zfp462		B1AWL2
23.9564	24.2404	24.1206	24.1923	24.0792	23.8884	24.4106	24.1786	26.6308	26.6	26.1197	26.2641	25.8144	25.4442	26.207	26.0183	26.0311	25.1779	25.414	23.7157	24.8576	26.2953	26.031	S	1	681	AKANRKLASDFPLDLSPVKKRTRIDEIASNL	Zfp462		B1AWL2
NaN	23.3265	NaN	25.3974	24.1245	NaN	NaN	23.6656	NaN	NaN	NaN	NaN	NaN	NaN	NaN	NaN	NaN	NaN	NaN	NaN	NaN	NaN	NaN	S	0.952777	1346	YTYMATKLWAGPDPSSPTLTMSAEAKTYRCR	Zfp462		B1AWL2
NaN	NaN	NaN	NaN	NaN	NaN	NaN	NaN	24.4162	25.4797	24.8435	NaN	23.8982	23.3138	23.4898	NaN	NaN	NaN	23.4112	22.6469	23.2018	22.702	NaN	S	0.999878	351	SKFSSSMSYPQMKPKSPHNSGLVNLTERSRY	Zfp462		B1AWL2
NaN	22.9545	23.5071	23.0385	23.2778	23.4646	23.5476	23.9485	NaN	25.4603	25.7681	25.6839	NaN	25.1591	21.9166	NaN	20.7933	NaN	24.9946	24.6857	25.029	25.4979	24.7027	S	0.999891	1736	ASRTISDKPNKVIIPSPPKDDSPQLSEELRR	Zfp462		B1AWL2
NaN	NaN	NaN	NaN	NaN	NaN	NaN	NaN	NaN	26.3778	25.9613	26.5742	25.6073	25.9991	24.9102	25.9092	25.2855	26.0951	25.8229	25.5599	26.2572	25.1446	25.8514	S	0.99539	89	KRDRERDSGLEDGRESPSFDTPSQRVQFILG	Slc4a10	Sodium-driven chloride bicarbonate exchanger;Anion exchange protein	Q5DTL9
NaN	NaN	NaN	NaN	NaN	NaN	NaN	NaN	NaN	21.7437	24.5965	24.7897	22.9797	NaN	24.239	24.4896	NaN	22.8778	24.4422	NaN	23.523	22.806	22.7793	S	0.974973	280	APACAENKNDVSRENSTVDFSKGLGGQQKGH	Slc4a10	Sodium-driven chloride bicarbonate exchanger;Anion exchange protein	Q5DTL9
NaN	NaN	NaN	NaN	NaN	NaN	NaN	NaN	NaN	23.6872	22.6161	24.0515	23.08	NaN	22.6981	22.1782	22.1756	NaN	23.1605	NaN	24.0482	23.1697	NaN	S	0.999907	247	RIPIVRSFADIGKKQSEPNSMDKNAGQVVSP	Slc4a10	Sodium-driven chloride bicarbonate exchanger;Anion exchange protein	Q5DTL9
26.2777	26.3688	26.5889	26.3128	26.0338	26.5163	26.8897	26.8207	27.3113	27.1013	27.0968	27.1619	26.5224	26.3101	26.9673	26.8657	26.5623	26.3625	26.7455	24.5862	25.8555	25.2644	26.9951	S	1	238	HQNQKKLANRIPIVRSFADIGKKQSEPNSMD	Slc4a10	Sodium-driven chloride bicarbonate exchanger;Anion exchange protein	Q5DTL9
NaN	NaN	NaN	NaN	NaN	NaN	NaN	NaN	23.8021	20.8019	23.975	NaN	NaN	NaN	NaN	22.6325	NaN	22.3425	NaN	NaN	19.563	22.4184	NaN	S	0.925933	517	RLLRESKRSKPKKRKSTEDGSHDDLFLIKQK	Zcchc7	Zinc finger CCHC domain-containing protein 7	B1AX39
25.3993	25.295	26.3258	26.2233	25.4102	26.1529	26.5137	26.3087	27.1185	26.7894	26.0396	26.9789	26.4351	26.1035	26.9906	26.7157	26.2872	25.8132	26.005	26.9869	26.2438	26.3215	26.4014	S	1	339	NMSGFNETDDLKRAESMLQQADKLGCRQFVT	Pls3	Plastin-3	Q99K51
23.3604	NaN	22.9698	22.3643	23.5278	23.1095	23.3381	23.7209	NaN	NaN	22.4918	23.4008	22.6519	NaN	22.8924	NaN	NaN	NaN	NaN	21.8249	NaN	NaN	NaN	S	1	268	ALLRDGETLEELMKLSPEELLLRWANFHLEN	Pls3	Plastin-3	Q99K51
NaN	NaN	NaN	NaN	NaN	NaN	NaN	NaN	23.287	23.4209	22.8568	23.8222	22.911	NaN	21.9544	22.1037	NaN	23.0412	22.6926	NaN	NaN	22.3013	23.1132	S	0.99916	326	PKGQKEGEPRIDINMSGFNETDDLKRAESML	Pls3	Plastin-3	Q99K51
23.5788	23.3233	20.4796	23.1398	NaN	23.04	NaN	23.5135	NaN	NaN	NaN	25.4052	24.7631	24.7498	25.1594	24.2756	24.2593	NaN	24.7498	23.2741	23.6477	25.2611	25.0794	S	1	293	NFHLENSGWQKINNFSADIKDSKAYFHLLNQ	Pls3	Plastin-3	Q99K51
NaN	NaN	NaN	NaN	NaN	NaN	NaN	NaN	25.4436	24.6309	23.9733	24.5015	25.2317	25.0331	25.3719	23.822	24.938	24.9703	24.4257	23.6526	24.6641	24.7869	25.1465	S	0.919084	14	__MLQLRDTVDSAGTSPTAVLAAGEDAGAGR	Tprg1l;Tprgl	Tumor protein p63-regulated gene 1-like protein	Q9DBS2
NaN	NaN	NaN	NaN	NaN	NaN	NaN	NaN	25.9505	26.3369	25.2657	25.9364	24.4373	24.6987	26.0837	25.0299	24.8484	23.9526	24.5878	23.1289	25.5313	25.483	24.7946	S	0.99993	55	PAAATAAAAASAAAASPQKYLRMEPSPFGDV	Akirin2	Akirin-2	B1AXD8
NaN	23.5459	23.5777	23.2018	23.3811	NaN	NaN	24.0889	NaN	NaN	NaN	NaN	NaN	NaN	NaN	22.9747	22.7227	NaN	NaN	22.3545	NaN	23.82	NaN	S	0.976364	123	TSDSQPHAFLISGPASPGTSSATSSPLKKEQ	Akirin2	Akirin-2	B1AXD8
24.7633	25.3073	25.6152	25.6079	25.3959	25.6523	25.7295	26.5151	27.1618	26.7706	26.5828	26.5402	26.6091	26.5134	26.7234	26.4985	26.3363	26.2949	26.6577	24.513	25.9171	26.9496	26.6431	S	1	21	TLKRTLDFDPLLSPASPKRRRCAPLSAPASA	Akirin2	Akirin-2	B1AXD8
NaN	NaN	NaN	NaN	NaN	NaN	NaN	NaN	NaN	NaN	NaN	21.087	21.1937	NaN	NaN	NaN	22.6374	24.3509	NaN	22.9254	NaN	NaN	NaN	S	0.909616	1055	PSTGDDQKSPGKGVTSPLHTDTEKEAISPGR	Nhsl2	NHS-like protein 2	E9Q0V6
NaN	NaN	NaN	NaN	NaN	NaN	NaN	NaN	22.6336	NaN	NaN	NaN	21.5689	22.4717	22.8601	NaN	NaN	NaN	22.3176	NaN	NaN	NaN	22.5248	S	0.793683	800	MSISIRSKTKVSRHHSDTNFGVKLAQKTSPN	Nhsl2	NHS-like protein 2	E9Q0V6
NaN	NaN	NaN	NaN	NaN	NaN	NaN	NaN	25.5477	24.4956	23.9884	23.767	24.2858	22.9762	25.35	24.5826	24.8527	24.4889	23.7109	NaN	NaN	NaN	24.4576	S	0.999998	14	__MPDRTEKHSTMPDSPVDVKTQSRLTPPAM	Runx1t1	Protein CBFA2T1	Q61909
NaN	NaN	23.0644	23.3116	NaN	23.6843	23.8001	24.3411	NaN	27.0415	25.4925	20.935	NaN	NaN	26.0901	26.3727	26.5116	25.3693	NaN	25.0774	NaN	NaN	NaN	S	1	390	LKKGGSSSSSHSRQQSPVNPDPVALDAHREF	Runx1t1	Protein CBFA2T1	Q61909
23.0845	22.7648	NaN	NaN	24.2322	NaN	NaN	NaN	23.9792	NaN	24.1501	22.8116	NaN	NaN	23.2843	24.0383	22.8599	23.706	NaN	22.6989	NaN	23.3951	23.3301	S	0.939291	144	LDEQPRGLALPASAQSPSTLDSALGPRRKEC	Cep131	Centrosomal protein of 131 kDa	Q62036
23.5819	NaN	23.8712	23.8638	24.2364	24.3661	24.4527	25.2625	25.0408	NaN	23.5234	NaN	NaN	20.8643	23.8029	23.8853	24.2908	23.8903	23.9178	NaN	23.7753	NaN	23.8898	S	0.999931	47	RPGSASATRSIFRSMSVATGSEPRKKALEAT	Cep131	Centrosomal protein of 131 kDa	Q62036
23.0151	NaN	22.9851	23.2172	22.7167	23.2245	23.52	NaN	NaN	NaN	23.1049	24.0138	NaN	23.951	NaN	NaN	NaN	NaN	24.0501	21.7913	NaN	22.9855	NaN	S	0.999958	400	VLLLCRQQLQELGAGSPGPVTNKATKILRHF	Enthd2	AP-4 complex accessory subunit tepsin	Q3U3N6
NaN	NaN	NaN	22.4748	NaN	23.0223	22.9198	23.7391	NaN	NaN	23.6264	21.7763	22.033	NaN	23.6103	22.0604	23.2958	23.3035	NaN	NaN	NaN	NaN	22.2703	S	1	227	FGLSKESIDHEKKAYSFCGTVEYMAPEVVNR	Rps6ka3;Rps6ka6	Ribosomal protein S6 kinase alpha-3;Ribosomal protein S6 kinase alpha-6;Ribosomal protein S6 kinase	P18654
24.2251	23.7558	22.8834	24.1272	24.4961	NaN	24.8449	24.4807	25.6874	NaN	24.5277	26.0435	25.4196	25.3605	25.3108	24.9097	25.0736	24.1562	25.5826	24.9831	24.3788	24.9306	25.4483	S	1	369	TFYFDPEFTAKTPKDSPGIPPSANAHQLFRG	Rps6ka3	Ribosomal protein S6 kinase alpha-3	P18654
NaN	23.879	24.6122	24.4983	23.1781	22.6667	NaN	24.1308	25.0566	NaN	NaN	23.0978	NaN	25.4444	23.0466	22.6327	NaN	NaN	22.2808	NaN	20.3401	22.318	23.5023	S	1	386	GIPPSANAHQLFRGFSFVAITSDDESQAMQT	Rps6ka3	Ribosomal protein S6 kinase alpha-3	P18654
25.7825	25.8381	26.1114	NaN	25.4671	25.2497	25.8719	26.2912	28.0533	27.6967	27.5423	28.0193	27.7864	27.3967	21.5855	27.4265	26.7767	27.7722	27.4181	26.5476	27.652	27.8053	28.0187	S	1	715	KGAMAATYSALNRNQSPVLEPVGRSTLAQRR	Rps6ka3	Ribosomal protein S6 kinase alpha-3	P18654
23.7121	22.7087	23.7491	24.032	24.576	24.2914	24.0872	24.2812	NaN	NaN	NaN	21.9543	21.7747	21.2522	21.8768	22.2811	21.9496	23.1647	NaN	NaN	22.9276	23.8894	23.3203	S	0.999997	147	ESVARSESGTNPREHSPSESEKEVVIADPRG	Nfx1	Transcriptional repressor NF-X1	B1AY10
NaN	22.5715	NaN	23.34	NaN	NaN	23.1757	23.4021	24.1094	NaN	23.8379	24.0047	23.4098	23.1721	23.8776	23.7919	24.0625	23.6991	NaN	NaN	23.1737	23.275	24.5712	S	0.963217	51	RRLDSSRIGRRNYSSSPPCHLPRHIPYEDIS	Nfx1	Transcriptional repressor NF-X1	B1AY10
21.9233	22.1295	23.5451	22.3098	21.7556	21.5475	22.5269	22.704	26.7406	26.5474	26.0142	26.3901	25.9092	24.2491	26.1633	24.752	25.9313	25.6693	26.1797	24.9195	25.5455	25.3415	26.6432	S	1	81	SAVHQHSYASGSKPKSPQGFFQSSNKSLKNH	Nfx1	Transcriptional repressor NF-X1	B1AY10
NaN	NaN	NaN	NaN	NaN	NaN	NaN	NaN	NaN	23.6497	23.2935	21.4957	NaN	NaN	22.8942	21.6997	NaN	NaN	22.6895	NaN	NaN	NaN	NaN	S	0.898212	2601	PANENGERHLQQGSESPMMIGELRSDLDDVD	Usp24	Ubiquitin carboxyl-terminal hydrolase 24;Ubiquitin carboxyl-terminal hydrolase	B1AY13
24.1261	NaN	23.639	23.7806	24.1719	23.9883	NaN	NaN	NaN	27.0203	NaN	NaN	NaN	NaN	NaN	25.4246	NaN	26.4611	26.2787	25.0174	NaN	26.537	NaN	S	0.913638	1609	DDFLFRASRIIVNSHSPASSAAISQQDFHPK	Usp24	Ubiquitin carboxyl-terminal hydrolase 24;Ubiquitin carboxyl-terminal hydrolase	B1AY13
21.0614	21.6414	21.7728	22.8759	22.3122	21.9772	22.4363	23.6195	NaN	26.0165	23.7166	25.3865	24.0208	24.1922	24.5169	23.9077	25.596	24.1475	24.7731	24.1674	24.4623	24.2035	25.0269	S	1	1940	EVGENGRNMDQGGGGSPRKKVALTENYELVG	Usp24	Ubiquitin carboxyl-terminal hydrolase 24;Ubiquitin carboxyl-terminal hydrolase	B1AY13
NaN	NaN	NaN	NaN	NaN	NaN	NaN	NaN	23.6698	NaN	23.7022	24.2326	22.274	23.4293	24.599	22.8168	NaN	NaN	23.4706	22.3286	22.3192	24.1415	22.9021	S	0.999991	1282	SRPFRNVSRQTSRQMSLCGTPEKSSYRQLSV	Usp24	Ubiquitin carboxyl-terminal hydrolase 24;Ubiquitin carboxyl-terminal hydrolase	B1AY13
25.7382	25.8823	26.325	25.913	25.7126	25.5938	25.7707	26.1137	26.4499	27.0275	26.7954	26.8151	25.2717	25.3184	26.5241	24.6712	25.731	24.7773	21.4763	NaN	23.6566	26.4638	26.7019	S	1	2558	VSNETSTGKTFQRTISAQDTLAYATALLNEK	Usp24	Ubiquitin carboxyl-terminal hydrolase 24;Ubiquitin carboxyl-terminal hydrolase	B1AY13
26.9839	26.7695	26.8939	27.245	27.0367	27.8656	27.9615	28.1745	29.5839	26.2078	27.0417	28.4097	27.9504	27.8162	28.8315	28.39	29.2702	28.4245	28.7811	28.3326	28.6472	28.7775	28.1709	S	1	2044	WNAYMLFYQRVSDQNSPVLPKKSRVSVVRQE	Usp24	Ubiquitin carboxyl-terminal hydrolase 24;Ubiquitin carboxyl-terminal hydrolase	B1AY13
22.14	21.6781	NaN	22.647	22.939	22.7413	23.7099	23.4092	25.4233	23.931	22.1968	NaN	NaN	NaN	24.968	NaN	NaN	NaN	24.4844	22.8951	23.5826	NaN	24.8738	S	0.991397	86	PFKAVDTNRASMGQASPESKGFTDLLLDDGQ	Plxdc2	Plexin domain-containing protein 2	Q9DC11
28.3716	28.151	27.7115	28.2046	27.9616	28.0655	29.221	29.6019	29.8992	29.3387	30.0037	29.6932	29.0597	29.7131	28.7896	29.6367	29.7966	29.751	29.6702	29.6929	29.3245	29.9302	28.0549	S	1	507	ERRPSRWPAMKFRRGSGHPAYAEVEPVGEKE	Plxdc2	Plexin domain-containing protein 2	Q9DC11
20.9695	21.2522	NaN	NaN	21.6909	NaN	NaN	NaN	NaN	NaN	NaN	NaN	NaN	NaN	NaN	NaN	NaN	NaN	NaN	NaN	NaN	NaN	NaN	S	0.99529	246	IYGDGSISPRTDPLGSPDVFTRNNPGFHGAP	Mbd5	Methyl-CpG-binding domain protein 5	B1AYB6
NaN	NaN	NaN	NaN	NaN	NaN	NaN	NaN	NaN	NaN	NaN	NaN	21.7386	NaN	22.4086	NaN	NaN	NaN	NaN	23.3558	21.7027	NaN	23.5514	S	0.803306	300	VQSSCAMAGRTNIPLSPTLTTKSPVMKKPMC	Mbd5	Methyl-CpG-binding domain protein 5	B1AYB6
22.9946	23.2168	23.3985	23.3059	24.5755	23.1045	NaN	23.9734	25.4674	24.7047	24.9606	24.2957	NaN	NaN	NaN	25.4518	24.4463	25.8646	NaN	23.4545	23.9381	24.8757	23.3713	S	1	776	GRTERARSERRRAQNSRDADWRDPLAKHIDD	Cwc22	Pre-mRNA-splicing factor CWC22 homolog	Q8C5N3
26.7268	26.4795	26.9888	27.5938	27.9683	27.8876	28.23	28.4792	29.8612	28.7851	29.2861	29.5923	29.5688	28.9232	30.2418	29.2547	30.0272	29.3495	29.6093	28.6333	30.0104	29.2373	29.2273	S	1	829	EDRHGEPKKRRERRDSFSENEKQRSRNQDSD	Cwc22	Pre-mRNA-splicing factor CWC22 homolog	Q8C5N3
22.9718	24.0847	23.1508	23.9449	24.0627	23.7764	24.1114	24.7882	NaN	25.8178	24.17	24.6132	NaN	NaN	24.0944	NaN	NaN	NaN	24.973	22.9044	22.8435	22.0531	23.7702	S	0.995779	106	SPSPDRSPARGGGQSSPQEEPTWKKKKDELD	Cwc22	Pre-mRNA-splicing factor CWC22 homolog	Q8C5N3
NaN	NaN	NaN	NaN	NaN	NaN	NaN	NaN	NaN	25.5938	24.4973	23.6504	23.7516	23.7659	24.4845	24.2074	23.197	23.5681	23.9815	NaN	23.8636	NaN	23.8166	S	1	38	RRSSSPEDRYTEQERSPRDRGYSDYSRSDYE	Cwc22	Pre-mRNA-splicing factor CWC22 homolog	Q8C5N3
23.678	NaN	23.4308	24.2215	22.3085	24.1118	NaN	NaN	25.668	NaN	23.6762	NaN	23.1341	24.9576	24.5503	24.267	24.9254	22.8731	NaN	24.5461	23.5591	24.9284	NaN	S	0.958158	1028	ISKADDDIIQKPAETSPPPVAPKPMTLRAET	Cobll1	Cordon-bleu protein-like 1	Q3UMF0
NaN	NaN	23.86	NaN	22.6553	23.3034	23.2591	23.3859	24.6013	26.827	25.615	25.8812	24.9714	23.8704	24.6488	24.2328	24.6304	NaN	24.4002	23.8391	24.8378	23.9473	26.8737	S	0.99775	1092	LPLVFPKPMTLRAETSPPPVAAKPVALPGSQ	Cobll1	Cordon-bleu protein-like 1	Q3UMF0
24.62	24.7213	25.9137	24.9173	24.4255	24.3821	24.9225	25.6411	25.8832	26.87	26.8623	27.6371	26.2866	25.9044	26.79	26.628	26.7683	26.2429	25.609	26.1325	27.1093	26.6944	26.8534	S	0.998257	1044	PPPVAPKPMTLRAETSPPPVFPKPMTLPAET	Cobll1	Cordon-bleu protein-like 1	Q3UMF0
25.1339	25.1161	NaN	24.6782	24.7585	25.0441	25.0222	25.0461	25.4302	NaN	24.2692	23.8394	24.2006	25.382	25.0095	23.7078	23.9533	NaN	25.1218	23.1782	24.1848	24.9149	NaN	S	0.995153	546	MRITVEKDPDSALGISDGETSPSSKGKTQEG	Cobll1	Cordon-bleu protein-like 1	Q3UMF0
25.9518	25.6899	25.8417	25.8727	25.3912	26.1444	27.0079	26.7653	27.3207	26.5684	26.8034	27.1624	26.1999	26.3584	25.8548	26.281	26.947	26.5015	26.7295	26.6231	26.3135	26.2354	26.6909	S	1	993	PKEPTIKEVQRDPQLSPEQHPSSLSERTHSA	Cobll1	Cordon-bleu protein-like 1	Q3UMF0
24.0267	23.5544	23.8653	24.5878	23.6103	24.8644	25.1895	25.2173	NaN	24.6918	NaN	NaN	NaN	NaN	24.8267	24.4805	NaN	NaN	NaN	NaN	NaN	24.6113	NaN	S	0.999974	666	RMDNVKSSRENHLTASPGPDQKLNQPGVEKT	Cobll1	Cordon-bleu protein-like 1	Q3UMF0
NaN	NaN	NaN	NaN	NaN	NaN	NaN	NaN	25.0414	NaN	23.0303	23.6366	23.3369	NaN	NaN	24.7647	NaN	NaN	NaN	24.0792	24.287	NaN	NaN	S	0.998631	770	PEKEPACTYGNNVPLSPVDGSNKNPAASYLK	Cobll1	Cordon-bleu protein-like 1	Q3UMF0
23.3229	23.6683	24.0272	23.2867	23.3476	23.8187	24.6029	24.5558	24.9524	NaN	29.3168	24.4184	23.2618	24.6243	24.9269	23.29	23.664	22.7649	25.525	NaN	29.3583	29.5343	25.1839	S	0.985707	300	FSFFQRSKKKREQTASAPATPLVSKHRPSFT	Cobll1	Cordon-bleu protein-like 1	Q3UMF0
25.1939	25.743	25.6998	26.7661	27.0203	26.943	27.0991	27.0348	25.4497	24.9678	23.9432	NaN	24.451	24.6211	25.9796	24.1543	24.1727	24.5006	25.0625	22.4761	NaN	25.3445	22.9269	S	0.999318	313	TASAPATPLVSKHRPSFTRSNTISKPYISNT	Cobll1	Cordon-bleu protein-like 1	Q3UMF0
NaN	22.8624	NaN	22.4444	NaN	22.3582	23.0304	23.0292	23.3352	24.3614	23.5524	22.9785	24.2559	23.5171	24.8452	24.3564	24.247	23.5487	NaN	20.6608	NaN	23.3739	23.7553	S	0.918615	1060	PPPVFPKPMTLPAETSPPPVFPKPMTLPAET	Cobll1	Cordon-bleu protein-like 1	Q3UMF0
26.1973	NaN	24.8753	26.805	26.2279	26.5094	26.9187	27.1002	26.7214	NaN	24.2796	22.4314	23.6045	26.4729	25.2247	25.0429	26.8937	NaN	27.1167	24.9833	24.5822	23.6101	NaN	S	1	794	PAASYLKNFPLYRQDSNPKPKPSNEITREYI	Cobll1	Cordon-bleu protein-like 1	Q3UMF0
23.6678	24.1244	24.3631	24.5417	24.5184	24.4328	25.0466	25.3363	NaN	27.8506	25.8433	27.5046	26.4013	27.1788	27.4969	27.4007	27.7098	27.9265	28.4957	27.6329	28.0291	28.0487	27.4395	S	1	359	MPTSQGAAQGQERRASCVERSTSVDDTDKSS	Cobll1	Cordon-bleu protein-like 1	Q3UMF0
NaN	23.3589	NaN	26.0895	NaN	NaN	26.8709	NaN	NaN	NaN	NaN	NaN	NaN	NaN	NaN	NaN	NaN	NaN	NaN	NaN	NaN	NaN	NaN	S	0.999804	958	QAKPSSFFLQMQKRASGHYVTSAAAKSVHTA	Cobll1	Cordon-bleu protein-like 1	Q3UMF0
NaN	NaN	NaN	NaN	NaN	NaN	29.0935	NaN	NaN	23.6938	28.4792	21.9572	22.3617	NaN	NaN	NaN	NaN	NaN	NaN	22.0895	22.9902	27.7351	27.0705	S	0.959284	1215	LTPADGPSFTLKRQSSLTFQSSDPEHVRQSL	Cobll1	Cordon-bleu protein-like 1	Q3UMF0
24.6963	24.5232	23.4198	24.4833	25.3033	24.7049	24.5884	25.4623	NaN	NaN	NaN	NaN	NaN	NaN	NaN	NaN	NaN	NaN	NaN	NaN	NaN	NaN	NaN	S	0.99793	366	AQGQERRASCVERSTSVDDTDKSSSEAIMVR	Cobll1	Cordon-bleu protein-like 1	Q3UMF0
25.9467	25.7107	26.3886	25.96	25.7177	26.0072	26.0983	27.1324	26.2268	NaN	22.7269	23.1037	NaN	NaN	25.3157	25.7273	26.1539	25.6348	25.7881	20.1702	NaN	21.5812	25.6483	S	0.999469	896	PKPSSGTERHLHRTLSSPTGTETNPPKAPRV	Cobll1	Cordon-bleu protein-like 1	Q3UMF0
23.1074	24.2628	23.5755	23.5854	23.1092	23.5708	NaN	NaN	NaN	NaN	23.5124	23.978	NaN	NaN	22.1155	NaN	NaN	22.7961	NaN	NaN	NaN	22.8648	NaN	S	0.99407	897	KPSSGTERHLHRTLSSPTGTETNPPKAPRVT	Cobll1	Cordon-bleu protein-like 1	Q3UMF0
NaN	NaN	NaN	NaN	NaN	NaN	NaN	NaN	23.1062	NaN	NaN	NaN	19.9678	NaN	NaN	NaN	20.7082	NaN	22.2836	NaN	NaN	NaN	NaN	S	1	119	LQVGNECLNKMHQVMSIEEVERILDETQEAV	Chmp6	Charged multivesicular body protein 6	P0C0A3
NaN	NaN	NaN	NaN	NaN	NaN	NaN	NaN	NaN	NaN	20.7167	NaN	NaN	NaN	NaN	22.4569	21.2169	22.2144	NaN	NaN	NaN	NaN	22.317	S	0.999341	385	AGLERNGRMRVKAIFSHAAGDNSTLLSFKEG	Baiap2	Brain-specific angiogenesis inhibitor 1-associated protein 2	Q8BKX1
NaN	NaN	NaN	NaN	NaN	NaN	NaN	NaN	25.0592	24.5053	23.4357	25.5217	23.7324	NaN	24.1771	23.6003	25.1441	NaN	NaN	NaN	23.0086	21.2652	23.4309	S	0.888228	262	MANSNGSILPSALSASKSNLVISDPIPGAKP	Baiap2	Brain-specific angiogenesis inhibitor 1-associated protein 2	Q8BKX1
23.3262	22.9408	22.684	23.3748	23.465	23.7388	24.0559	23.9177	23.6076	NaN	NaN	22.9017	NaN	21.1423	23.3176	19.9632	22.3231	21.9382	23.1341	NaN	22.5957	23.4967	22.7816	S	0.999416	326	YNPWADRKAAQPKSLSPPQSQSKLSDSYSNT	Baiap2	Brain-specific angiogenesis inhibitor 1-associated protein 2	Q8BKX1
25.6011	24.8597	25.1216	25.7256	25.6742	26.3138	26.8474	25.9432	25.1114	24.3036	24.5905	25.0553	24.6934	24.624	25.0151	24.4273	25.08	24.8876	24.9022	24.6765	25.0045	24.9185	25.0172	S	0.999844	367	NSYATTENKTLPRSSSMAAGLERNGRMRVKA	Baiap2	Brain-specific angiogenesis inhibitor 1-associated protein 2	Q8BKX1
NaN	NaN	NaN	NaN	NaN	NaN	NaN	NaN	22.249	24.1929	22.1648	NaN	22.7871	NaN	NaN	22.3262	NaN	NaN	NaN	22.4476	22.8555	NaN	24.1229	S	0.999497	455	GSDRLHMSLQQGKSSSTGNLLDKDDLALPPP	Baiap2	Brain-specific angiogenesis inhibitor 1-associated protein 2	Q8BKX1
26.0311	25.9081	25.8695	26.8329	26.4936	27.0604	26.8506	27.0257	28.4159	27.8714	27.3977	27.6156	27.5489	27.4196	27.5674	27.8918	27.7907	28.0352	28.1108	27.0622	27.0338	26.5532	27.5815	S	1	12	____MADRGGPAEAPSPRGSPRPESRAPRTV	Tmem245	Transmembrane protein 245	B1AZA5
NaN	NaN	NaN	NaN	NaN	NaN	NaN	NaN	NaN	NaN	NaN	NaN	NaN	NaN	NaN	NaN	NaN	NaN	NaN	22.3141	23.3698	23.9601	NaN	S	0.999917	16	MADRGGPAEAPSPRGSPRPESRAPRTVGPGE	Tmem245	Transmembrane protein 245	B1AZA5
25.9262	25.9127	24.6563	24.4678	24.6356	24.3393	25.9003	25.8724	26.1002	25.5373	25.5337	26.1585	25.9479	25.3369	23.4513	25.6229	26.2077	24.8099	25.5789	24.6807	25.9039	26.6425	26.2556	S	0.998351	327	ALSASSSSSSRSSPSSPSPTLGRQRPEMGTF	Tmem245	Transmembrane protein 245	B1AZA5
NaN	NaN	NaN	NaN	NaN	NaN	NaN	NaN	25.9426	24.3898	23.5208	25.0701	NaN	24.7376	24.8294	22.2083	23.8762	24.1017	NaN	24.341	24.2306	24.1247	22.8334	S	1	1486	EKKDEKDRKERKRDHSNNDREVPPDITKRRK	Thoc2	THO complex subunit 2	B1AZI6
NaN	NaN	NaN	NaN	NaN	NaN	NaN	NaN	NaN	24.4964	23.3308	25.4763	24.1262	23.3992	24.8895	24.4152	25.2191	24.6914	NaN	25.1806	26.8573	25.2945	26.5404	S	1	1364	VESKSTQEREREKEPSRERDVAKEMKSKENV	Thoc2	THO complex subunit 2	B1AZI6
25.2183	24.8787	24.8805	26.0836	NaN	26.3254	26.4936	26.5671	NaN	NaN	22.8614	23.3076	22.9247	23.89	23.4897	23.22	23.9554	22.9144	NaN	NaN	NaN	NaN	NaN	S	0.90806	1516	KEENGTMGVSKHKSESPCESQYPNEKDKEKN	Thoc2	THO complex subunit 2	B1AZI6
28.4886	27.9143	28.3261	29.1851	29.5169	29.3359	29.6411	29.4981	29.6568	28.77	28.4216	29.2273	28.5556	28.1243	28.0346	28.3664	27.9955	29.172	28.6417	27.2643	29.1086	28.1574	28.7492	S	0.99884	1417	EPDREQKRRKIDSHPSPSHSSTVKDSLIDLK	Thoc2	THO complex subunit 2	B1AZI6
23.8317	23.2394	NaN	NaN	23.469	23.6067	23.9628	24.0559	25.6447	NaN	NaN	NaN	NaN	NaN	NaN	NaN	NaN	NaN	24.6127	NaN	NaN	NaN	NaN	S	0.914766	1450	SAKLYINHNPPPLSKSKEREMDKKDLDKSRE	Thoc2	THO complex subunit 2	B1AZI6
23.7042	23.6388	24.4459	24.5192	24.763	24.3979	25.0866	24.9941	24.3054	23.6168	24.0373	24.1164	23.6545	NaN	24.0721	23.257	24.081	23.066	24.2512	23.9256	22.956	24.5895	23.7093	S	0.999564	1393	NVKGGEKTPVSGSLKSPVPRSDISEPDREQK	Thoc2	THO complex subunit 2	B1AZI6
22.5831	21.9813	22.6838	22.3965	21.7089	NaN	22.5372	22.643	23.1862	23.7085	23.8793	24.2135	23.1148	24.1483	24.1378	24.1355	24.1757	23.5679	23.4702	21.0258	21.8372	22.3644	23.8686	S	0.818722	665	TSSESHSEAIPKRKLSSIGIQVDCIQPVPKE	Dlgap4	Disks large-associated protein 4	B1AZP2
NaN	NaN	NaN	NaN	NaN	NaN	NaN	NaN	NaN	NaN	NaN	NaN	23.8694	23.6636	23.8978	23.021	22.4842	NaN	23.9551	21.6635	21.6169	NaN	NaN	S	0.975972	973	KRLLAAKRAASVRQNSATESADSIEIYVPEA	Dlgap4	Disks large-associated protein 4	B1AZP2
20.8395	21.0425	21.6159	21.7859	22.8843	21.7497	22.2538	22.8066	NaN	NaN	NaN	NaN	NaN	NaN	NaN	NaN	NaN	NaN	NaN	NaN	NaN	NaN	NaN	S	0.997295	716	SSAPSHSMSSRRDTDSDTQDANDSSCKSSER	Dlgap4	Disks large-associated protein 4	B1AZP2
NaN	NaN	NaN	NaN	NaN	NaN	NaN	NaN	NaN	25.0242	NaN	NaN	25.7133	NaN	25.152	25.452	NaN	NaN	NaN	NaN	24.9973	25.8181	26.2882	S	0.903872	888	TQEIVRCDERGSLGTSGETCRCKNNVVGRLC	Hspg2	Basement membrane-specific heparan sulfate proteoglycan core protein;Endorepellin;LG3 peptide	E9PZ16
NaN	NaN	NaN	NaN	NaN	NaN	NaN	NaN	NaN	24.4205	24.4141	24.0225	23.4374	24.3299	24.8964	NaN	NaN	NaN	NaN	23.6265	22.8351	23.1386	24.8969	S	0.99999	2402	THGSLLRLHQVSPVDSGEYVCRVEGGAVPLE	Hspg2		E9PZ16
NaN	NaN	NaN	NaN	NaN	NaN	NaN	NaN	NaN	NaN	23.2033	24.176	NaN	NaN	24.3106	23.1381	23.7824	24.3744	22.2298	23.2826	NaN	22.5649	24.5773	S	0.998745	997	NGGNSAEVLNVKAGESPTPAGDAQAIGALKP	Mylk	Myosin light chain kinase, smooth muscle;Myosin light chain kinase, smooth muscle, deglutamylated form	Q6PDN3
NaN	NaN	NaN	NaN	NaN	NaN	NaN	NaN	25.115	24.5931	23.6286	24.7885	24.9224	24.2328	25.3014	23.7741	24.1552	25.7849	24.3028	24.0746	25.4324	24.4288	25.6741	S	1	263	LDNASRLAVRGTKAPSPDIRKEVTNGVSKDP	Mylk	Myosin light chain kinase, smooth muscle;Myosin light chain kinase, smooth muscle, deglutamylated form	Q6PDN3
NaN	NaN	NaN	NaN	NaN	NaN	NaN	NaN	23.8974	NaN	22.9698	24.0903	NaN	NaN	NaN	23.3206	23.4209	24.3838	NaN	23.4695	24.2623	25.254	NaN	S	0.998873	306	QRSGSSARATNSHLKSPQEPKPKLCEDAPRK	Mylk	Myosin light chain kinase, smooth muscle;Myosin light chain kinase, smooth muscle, deglutamylated form	Q6PDN3
21.8962	22.6668	23.3052	23.6745	24.0607	24.4524	24.0988	24.171	26.1516	26.0651	25.951	26.2493	25.4186	25.4183	26.1335	26.1559	25.3362	26.6444	26.2646	24.0305	25.8243	25.3556	27.2489	S	1	602	TVQEKKGEGEREHRLSPARSKPIAPIFLQGL	Mylk	Myosin light chain kinase, smooth muscle;Myosin light chain kinase, smooth muscle, deglutamylated form	Q6PDN3
23.009	NaN	24.3107	22.8492	NaN	NaN	NaN	NaN	NaN	23.8087	23.096	23.3712	23.0826	NaN	NaN	NaN	22.7382	NaN	NaN	24.0668	23.4947	23.4308	24.0312	S	0.990446	1795	LSSMAMISGLSGRKSSTGSPTSPINAEKLES	Mylk	Myosin light chain kinase, smooth muscle;Myosin light chain kinase, smooth muscle, deglutamylated form	Q6PDN3
NaN	NaN	NaN	NaN	NaN	NaN	NaN	NaN	NaN	NaN	NaN	NaN	NaN	NaN	NaN	NaN	24.4587	NaN	NaN	NaN	NaN	NaN	24.2788	S	0.997681	1798	MAMISGLSGRKSSTGSPTSPINAEKLESEDD	Mylk	Myosin light chain kinase, smooth muscle;Myosin light chain kinase, smooth muscle, deglutamylated form	Q6PDN3
NaN	24.6419	26.3777	24.374	NaN	NaN	NaN	NaN	24.2692	26.7874	25.3451	25.8699	26.1042	24.7656	24.9544	25.371	24.5935	26.278	24.6258	25.6767	24.9832	25.2541	26.9573	S	0.998812	1801	ISGLSGRKSSTGSPTSPINAEKLESEDDVSQ	Mylk	Myosin light chain kinase, smooth muscle;Myosin light chain kinase, smooth muscle, deglutamylated form	Q6PDN3
NaN	NaN	NaN	NaN	NaN	NaN	NaN	NaN	24.3731	24.9643	23.9554	24.4838	24.7575	NaN	25.661	21.5558	24.3843	23.7598	25.0791	24.0389	23.6441	24.2272	25.3524	S	1	935	QVKPKTISEEERKVHSPQQVDFRSVLAKKGT	Mylk	Myosin light chain kinase, smooth muscle;Myosin light chain kinase, smooth muscle, deglutamylated form	Q6PDN3
NaN	NaN	NaN	NaN	22.5183	21.453	22.2818	22.9475	24.431	23.7498	24.1762	24.1219	23.6006	24.1459	24.3807	23.5065	23.2209	22.1473	23.3077	23.7189	23.362	22.0632	24.1601	S	0.999886	1782	WQKTGNAVRAIGRLSSMAMISGLSGRKSSTG	Mylk	Myosin light chain kinase, smooth muscle;Myosin light chain kinase, smooth muscle, deglutamylated form	Q6PDN3
NaN	NaN	NaN	NaN	NaN	NaN	NaN	NaN	26.0288	25.1583	23.443	24.7572	25.6606	25.7442	24.385	22.3706	25.6237	25.6352	NaN	24.6551	24.9575	25.5186	26.5226	S	0.998658	377	SLAAPQQATLPTRQSSLGGSVGNKFVTGNIP	Mylk	Myosin light chain kinase, smooth muscle;Myosin light chain kinase, smooth muscle, deglutamylated form	Q6PDN3
NaN	NaN	NaN	NaN	NaN	NaN	NaN	NaN	23.2816	NaN	21.9729	23.2557	22.9596	NaN	23.4918	22.9604	23.4444	22.0164	NaN	23.6551	21.941	23.1336	22.8331	S	0.777312	333	APRKVPQSSILQKSTSTITLQALKVQPEARV	Mylk	Myosin light chain kinase, smooth muscle;Myosin light chain kinase, smooth muscle, deglutamylated form	Q6PDN3
NaN	NaN	NaN	NaN	NaN	NaN	NaN	NaN	24.5666	24.5161	24.4854	24.1642	23.7892	24.0195	24.3355	22.997	21.2237	22.3437	NaN	22.7968	23.0707	NaN	23.0171	S	0.790139	802	RVGECSCQVSLMLHNSPSRAPPRGREPASCE	Mylk	Myosin light chain kinase, smooth muscle;Myosin light chain kinase, smooth muscle, deglutamylated form	Q6PDN3
23.4882	23.2392	23.6866	21.0848	21.3635	NaN	23.6378	NaN	29.342	28.1821	28.3949	29.2062	29.0966	29.1371	29.2107	28.5053	28.9358	29.3425	28.518	29.0846	28.497	29.2563	29.4699	S	0.998709	355	LKVQPEARVPAIGSFSPGEDRKSLAAPQQAT	Mylk	Myosin light chain kinase, smooth muscle;Myosin light chain kinase, smooth muscle, deglutamylated form	Q6PDN3
NaN	NaN	NaN	NaN	NaN	NaN	NaN	NaN	24.7439	24.7169	23.6437	24.7929	23.6471	24.35	NaN	NaN	NaN	NaN	NaN	23.4017	23.7085	23.6843	24.2449	S	0.999977	712	ENIGYDPERGTHLPESPRLEDFYRFSWEDVD	Brpf3		B2KF05
NaN	NaN	NaN	NaN	NaN	NaN	NaN	NaN	NaN	24.6199	24.3173	24.3847	24.0884	NaN	24.8122	25.1924	24.2157	24.616	24.8717	22.6632	22.566	NaN	23.9084	S	0.765042	1095	GGAARLRFFSMKRTVSQQSFDGVSLDSGGPD	Uhrf1bp1		B2KF50
NaN	NaN	NaN	NaN	NaN	NaN	NaN	NaN	24.2632	25.1272	23.711	25.4901	NaN	NaN	23.5748	NaN	NaN	NaN	NaN	22.9182	24.0816	22.8731	NaN	S	0.970257	1098	ARLRFFSMKRTVSQQSFDGVSLDSGGPDDRI	Uhrf1bp1		B2KF50
NaN	NaN	NaN	NaN	NaN	NaN	NaN	NaN	23.098	21.7309	21.3115	22.9294	20.0415	NaN	22.7658	22.5665	21.45	22.3093	NaN	21.4745	21.5501	23.5774	23.2602	S	0.93808	442	KADSFSSPGKTPLDKSPTQGRQAAFGAPAWN	Uhrf1bp1		B2KF50
23.1807	23.6625	23.0299	24.0491	24.1254	23.694	23.9006	23.9974	26.1477	25.5397	25.7522	24.8631	24.9102	24.9844	25.6975	25.3934	25.3757	24.6259	22.7603	24.9996	25.8061	24.8911	23.7067	S	1	215	TQPHRKVEGNFNPFASPQKNRQSDENNLTDP	D17Wsu92e	Uncharacterized protein C6orf106 homolog	Q3TT38
NaN	NaN	NaN	NaN	NaN	NaN	NaN	NaN	22.9334	24.2954	20.129	22.8612	22.7105	21.8337	22.1877	23.502	23.0832	22.72	NaN	22.1703	NaN	NaN	23.2964	S	0.923803	34	QEISKGKRKEDSLTASQRKQRDSEIMQQKQK	Serf1	Small EDRK-rich factor 1	O88892
NaN	NaN	NaN	NaN	NaN	NaN	NaN	NaN	NaN	22.4382	22.8392	22.3996	22.2595	NaN	22.8493	22.9836	21.5807	22.0868	22.8003	22.3191	23.5781	22.9991	21.528	S	0.766914	593	SEPVSKENTETSKEPSPTKTPTISPVITAPP	Bicd1	Protein bicaudal D homolog 1	Q8BR07
NaN	NaN	NaN	NaN	NaN	NaN	NaN	NaN	NaN	23.8464	23.9704	24.778	NaN	NaN	23.2536	NaN	NaN	NaN	NaN	24.1446	24.5417	23.2429	NaN	S	0.992975	556	SKVKPPGLEQRRRASSQDGLETLKKDITKKG	Mdm1	Nuclear protein MDM1	Q9D067
NaN	NaN	NaN	NaN	NaN	NaN	NaN	NaN	NaN	NaN	NaN	NaN	NaN	NaN	NaN	NaN	NaN	NaN	NaN	23.6666	24.828	NaN	NaN	S	0.813316	539	HHDLTTPAVGGAVLVSPSKVKPPGLEQRRRA	Mdm1	Nuclear protein MDM1	Q9D067
NaN	NaN	NaN	NaN	NaN	NaN	NaN	NaN	21.9963	NaN	NaN	22.5274	22.0283	NaN	22.5586	23.5672	22.6327	23.5147	22.4992	NaN	21.964	23.1355	23.6853	S	1	418	PQKHPPTKLEERKVASGEQPLKNSTRRLEMP	Mdm1	Nuclear protein MDM1	Q9D067
25.2724	25.4466	25.3817	25.4402	25.5318	25.5475	25.5893	25.8172	28.19	27.7589	27.7208	27.8845	27.4222	27.2151	27.7288	27.7674	26.9877	26.6132	NaN	27.1215	26.629	26.9119	27.6246	S	0.999999	45	PAAQPPAAAAPSAVGSPAAAPRQPGLMAQMA	Chchd2;Zbed5	Coiled-coil-helix-coiled-coil-helix domain-containing protein 2	Q9D1L0
24.1484	24.4129	24.6185	24.3444	24.269	24.1527	24.1905	24.5151	24.6018	23.8818	24.1905	23.8503	24.096	24.6552	24.3856	24.8512	24.5829	24.6344	24.0087	24.1415	23.5428	24.7912	24.7659	S	0.999986	376	YRESFVQRQRTSRLFSISNRITDLGLSPHLT	Gpr161	G-protein coupled receptor 161	B2RPY5
23.8905	23.941	23.3198	NaN	24.2058	23.8614	23.816	24.2567	26.0166	25.8338	25.664	25.0981	NaN	25.3017	24.8117	24.5498	24.0348	NaN	NaN	24.9363	24.8613	24.6021	24.9165	S	1	9	_______MSEAARDLSPGAPPAVAAAAPEER	Hectd2	Probable E3 ubiquitin-protein ligase HECTD2	Q8CDU6
21.5813	24.0008	24.3108	NaN	24.3805	23.9446	24.7647	24.6984	24.8317	24.4806	24.5782	25.694	25.463	24.3419	24.8804	25.157	25.1507	25.9197	24.8556	24.2407	25.739	24.759	25.2915	S	0.999957	632	ASSGSPALPRKQRDKSPSSLLEDAKETCFTR	Abl2	Abelson tyrosine-protein kinase 2;Non-specific protein-tyrosine kinase	Q4JIM5
[truncated: 19,122 more rows]
