# Supplementary material for: Phosphoproteomics reveals that Parkinson's disease kinase LRRK2 regulates a subset of Rab GTPases
Source: eLife. 2016 Jan 29;5:e12813. doi: 10.7554/eLife.12813 (PMC4769169; doi:10.7554/eLife.12813)
Supplement: Supplementary file 2. — DOI: http://dx.doi.org/10.7554/eLife.12813.020 [file elife-12813-supp2.xlsx]

## Sheet: TableS2
Log2-A2016T_1	Log2-A2016T_2	Log2-A2016T_3	Log2-A2016T_4	Log2-wt_1	Log2-wt_2	Log2-wt_3	Log2-wt_4	Fold change (A2016T vs wt)	Protein IDs (Uniprot)	Protein names	Gene names
29.736	29.7398	29.8202	29.6558	29.5742	28.9106	29.6376	29.1303	1.34236	A0A023T672		RBM8
NaN	NaN	NaN	NaN	NaN	27.0582	NaN	NaN	NaN	Q8BUV3;A0JNY3	Gephyrin;Molybdopterin adenylyltransferase;Molybdopterin molybdenumtransferase	Gphn
29.1268	29.3289	29.0876	29.0707	29.9736	29.9313	29.9878	29.8437	0.582125	A1BN54		Actn1
28.4494	28.1635	28.5817	28.5481	28.8881	28.6841	29.0406	28.5471	0.782249	E9QN37;A1L314	Macrophage-expressed gene 1 protein	Mpeg1
28.2733	28.2851	28.1349	28.3074	28.0679	28.3132	28.257	28.3022	1.01052	A2A432;E9PXY1;A2A432-2	Cullin-4B	Cul4b
NaN	NaN	NaN	26.0831	NaN	NaN	NaN	NaN	NaN	A2A4A1;Q91ZF0	DnaJ homolog subfamily C member 24	Dnajc24
28.2478	28.3267	28.0424	28.1136	27.9412	27.8029	28.4342	28.0101	1.09849	Q62077;A2A4A6	1-phosphatidylinositol 4,5-bisphosphate phosphodiesterase gamma-1;Phosphoinositide phospholipase C	Plcg1
NaN	NaN	NaN	NaN	23.1804	NaN	NaN	NaN	NaN	Q99PI4;A2A4B3;A2A4B1	Phosphatidate phosphatase LPIN3	Lpin3
28.187	28.0672	28.0501	28.0535	27.6861	27.946	27.9343	28.0478	1.13753	Q9D1C1;A2A4Z1	Ubiquitin-conjugating enzyme E2 C	Ube2c
24.7805	25.0223	24.7602	24.7435	24.7108	24.8071	24.6854	24.5601	1.09868	Q9CZV8;A2A533;A2A536;Q9CZV8-4;Q9CZV8-3	F-box/LRR-repeat protein 20	Fbxl20
33.7777	33.6271	33.7878	33.7663	33.8656	34.0047	33.8875	33.8658	0.891202	P84099;A2A547	60S ribosomal protein L19;Ribosomal protein L19	Rpl19
28.2561	28.1425	28.3187	28.239	28.4629	28.2515	28.2308	27.9727	1.00668	A2A5R2	Brefeldin A-inhibited guanine nucleotide-exchange protein 2	Arfgef2
27.9706	28.211	28.1594	28.2452	28.299	28.453	28.7157	28.3112	0.813281	A2A5S3;Q9Z108;Q9DBE7;A2A5R8;V9GX87	Double-stranded RNA-binding protein Staufen homolog 1	Stau1
27.4053	27.4483	27.6478	27.46	27.0645	27.3911	27.5654	27.4707	1.0848	A2A5V4;A2A5V3;A2A5V2;S4R2D3;P55194;S4R2T6	SH3 domain-binding protein 1	Sh3bp1
NaN	NaN	NaN	NaN	NaN	NaN	NaN	24.8248	NaN	A2A5Z6;A2A5Z6-2	E3 ubiquitin-protein ligase SMURF2	Smurf2
25.1507	25.3967	25.8452	NaN	25.5714	NaN	NaN	26.4406	0.686913	E9Q6A7;A2A654;A2A655		Bptf
NaN	NaN	NaN	NaN	21.957	NaN	NaN	NaN	NaN	A2A6A1	G patch domain-containing protein 8	Gpatch8
NaN	NaN	NaN	NaN	NaN	NaN	NaN	NaN	NaN	Q9CZ28;A2A6M1	Vacuolar-sorting protein SNF8	Snf8
NaN	25.1278	NaN	NaN	24.8957	NaN	25.1539	NaN	1.074	A2A6Q5;A2A6Q5-2;A2A6Q5-3	Cell division cycle protein 27 homolog	Cdc27
NaN	NaN	NaN	NaN	NaN	NaN	NaN	25.5345	NaN	A2A6T1	Cerebellar degeneration-related protein 2-like	Cdr2l
NaN	NaN	25.4222	NaN	25.3091	25.6896	NaN	NaN	0.947928	A2A709;Q8VCA8	Secernin-2	Scrn2
30.2557	30.2283	30.2846	30.2601	30.0221	30.2252	30.2593	30.1979	1.05779	Q8CFX1;A2A7A7	GDH/6PGL endoplasmic bifunctional protein;Glucose 1-dehydrogenase;6-phosphogluconolactonase	H6pd
NaN	24.7263	25.0202	24.812	NaN	24.7451	24.9983	24.8686	0.987715	Q9WU20;F6Z4F8;A2A7F7;F7BGN3	Methylenetetrahydrofolate reductase	Mthfr
28.4323	28.6415	28.4619	28.5575	28.5014	28.5498	28.6407	28.447	0.992112	Q8BHG2;A2A8E2;Q8BHG2-3;B7ZC72;B7ZC71;Q8BHG2-2	UPF0587 protein C1orf123 homolog	0610037L13Rik
28.5971	28.4859	28.6334	28.596	28.4504	28.5291	28.6723	28.6801	0.996627	Q52KI8;A2A8V9;E9QKA4;A2A8V8;E9PUK6;Q52KI8-2;A2A983	Serine/arginine repetitive matrix protein 1	Srrm1
28.2941	28.2421	28.4095	28.4451	28.3841	27.9509	28.1253	28.1406	1.14669	A2A8Z1;E9Q6C1;F6UHR6;E9PXZ2;A2A8Z1-2	Oxysterol-binding protein-related protein 9;Oxysterol-binding protein	Osbpl9
NaN	NaN	NaN	24.632	NaN	NaN	NaN	NaN	NaN	Q9D7W5;A2A9C6;A2A9C8;Q9CY05;Q9DAY7	Mediator of RNA polymerase II transcription subunit 8	Med8
NaN	NaN	NaN	NaN	NaN	NaN	26.3959	26.5303	NaN	A2A9I0;O35166	Golgi SNAP receptor complex member 2	Gosr2
30.4044	30.5068	30.3752	30.432	30.5465	30.5083	30.6301	30.5039	0.92172	E9PX48;A2A9M5;Q8R1A4-2;Q8R1A4	Dedicator of cytokinesis protein 7	Dock7
30.7077	30.7486	30.6947	30.6812	30.6291	30.7277	30.852	30.8309	0.964682	Q8BHG1;A2A9Q2;A6PWC3	Nardilysin	Nrd1
28.9172	28.9952	29.1075	29.0046	28.7655	29.164	28.6344	28.9592	1.09077	Q3U2P1;A2AA71	Protein transport protein Sec24A	Sec24a
27.1931	27.64	27.132	27.0547	27.163	26.9428	26.7471	26.612	1.30924	Q6NXN1;A2AA85;Q6NXN1-2	SUZ domain-containing protein 1	Szrd1
27.3229	27.1703	27.0259	27.3929	27.4126	27.4791	27.2453	27.2116	0.927134	O35250;A2AAN0;O35250-2	Exocyst complex component 7	Exoc7
30.1736	30.0852	30.0718	30.095	29.9334	29.7213	29.932	29.6844	1.22148	A2AAY5	SH3 and PX domain-containing protein 2B	Sh3pxd2b
NaN	NaN	NaN	NaN	22.0652	NaN	NaN	NaN	NaN	A2ABV5;A2BDN7;A2BDP0;A2ABV5-3;A2ABV5-2	Mediator of RNA polymerase II transcription subunit 14	Med14
NaN	NaN	NaN	26.0949	NaN	NaN	NaN	NaN	NaN	Q922E4;A2ABY3	Ethanolamine-phosphate cytidylyltransferase	Pcyt2
NaN	NaN	23.7694	NaN	NaN	NaN	NaN	NaN	NaN	Q8BQZ4;A2ACC7;F8WHN4;A2ACC6;E9Q0J2	Ral GTPase-activating protein subunit beta	Ralgapb
26.6409	26.8375	26.7912	26.6796	26.8695	27.087	26.5285	26.6137	0.974426	Q9QXG2;A2AD03;Q3UR39	Rab proteins geranylgeranyltransferase component A 1	Chm
28.5408	28.1349	28.153	28.2851	28.1561	28.6068	28.648	28.7349	0.836246	F6TBV1;F6WHL0;A2ADH1;Q9CQY5-2;Q9CQY5-3;Q9CQY5	Magnesium transporter protein 1	Magt1
27.7579	28.1542	28.0059	27.9455	27.9676	27.9219	28.0856	27.927	0.993333	Q8R3G1;A2ADR8	Nuclear inhibitor of protein phosphatase 1	Ppp1r8
29.5675	29.4659	29.3434	29.3438	29.3036	29.1586	29.3806	29.1719	1.13012	A2ADY9	Protein DDI1 homolog 2	Ddi2
29.5585	29.6645	29.5525	29.5765	29.777	29.5405	29.6297	29.5055	0.982701	A2AE27;Q9DBT5	AMP deaminase 2	Ampd2
26.3926	26.4448	26.5021	26.2549	26.4485	NaN	NaN	26.6722	0.89394	Q9R0Q4;A2AEB4;A2AEB3;A2AEB5	Mortality factor 4-like protein 2	Morf4l2
28.2244	28.0255	28	28.14	27.7505	28.1276	28.0566	28.0816	1.06688	Q8BIQ5;A2AEK1;Q8BIQ5-2	Cleavage stimulation factor subunit 2	Cstf2
NaN	NaN	NaN	NaN	NaN	NaN	NaN	25.9163	NaN	Q99LI2;A2AEM2	Chloride channel CLIC-like protein 1	Clcc1
NaN	NaN	NaN	NaN	NaN	NaN	NaN	26.034	NaN	A2AER4;Q9R0M8	UDP-galactose translocator	Slc35a2
26.6039	26.6808	26.6428	26.7563	26.6535	26.5192	26.5539	26.4498	1.09191	Q91VJ5;A2AER8	Polyglutamine-binding protein 1	Pqbp1
NaN	NaN	NaN	NaN	NaN	NaN	NaN	25.9704	NaN	Q64092;A2AEW0;A2AEW1;Q64092-3;Q64092-2;Q64092-4;A2AEW2	Transcription factor E3	Tfe3
33.4931	33.5428	33.4269	33.4063	33.5906	34.0895	33.4338	33.9391	0.814522	A2AEX8;A2AEX6;P97447;A2AEY1	Four and a half LIM domains protein 1	Fhl1
NaN	NaN	NaN	NaN	NaN	NaN	NaN	25.485	NaN	A2AEY2		Fhl1
26.9816	26.7915	26.8338	26.5439	26.5966	26.9862	26.637	26.7356	1.03444	O35638;A2AFF6	Cohesin subunit SA-2	Stag2
25.9641	26.1456	26.2552	25.9545	26.2493	NaN	NaN	NaN	0.889182	Q9R0M6;A2AFP5;A2AFP4	Ras-related protein Rab-9A	Rab9a;Rab9
31.1698	31.3331	31.3318	31.2708	31.4057	31.3506	31.3882	31.3579	0.933534	Q7TMY8;A2AFQ0;Q7TMY8-3;Q7TMY8-4;Q7TMY8-2	E3 ubiquitin-protein ligase HUWE1	Huwe1
27.1822	27.4245	27.4168	27.3947	27.4464	27.2036	27.15	27.2883	1.05883	Q8BX17;A2AFQ9;E9PUU4	Gem-associated protein 5	Gemin5
25.6571	25.6703	25.8757	NaN	NaN	25.7232	25.5399	25.584	1.08573	Q64430;A2AG68	Copper-transporting ATPase 1	Atp7a
NaN	NaN	NaN	NaN	NaN	NaN	NaN	NaN	NaN	Q8CGF6;A2AGC6	WD repeat-containing protein 47	Wdr47
32.2188	32.174	32.216	32.2927	32.6586	32.8209	32.8113	32.7229	0.693491	Q5FWK3;A2AH25	Rho GTPase-activating protein 1	Arhgap1
31.543	31.6008	31.615	31.5461	31.5836	31.5206	31.5212	31.4647	1.03792	O08810;A2AH85;G3UZ34	116 kDa U5 small nuclear ribonucleoprotein component	Eftud2
NaN	NaN	NaN	NaN	NaN	NaN	24.2616	NaN	NaN	A2AHC3;A2AHC4;A2AHC3-2	Calmodulin-regulated spectrin-associated protein 1	Camsap1
NaN	NaN	25.6264	25.4547	NaN	NaN	NaN	NaN	NaN	Q3TPQ7;A2AHM2;A2ARW1;L7N1Z0;F6R9A8;Q6PEE4;F7CEW8;A2BE23;A2ART4;A2ARR7;L7N248;A2ARL5;L7N208;A2BG91;Q60980;E9PXJ4;Q3US17;Q7TSH9;Q9EQB9;E9QAH2;O35738;Q6NVD6;Q9Z0Z7;Q8BGS5;Q640N4;Q6NXM6;G3X9T2;Q99JB0;Q9Z1D9;Q8BMU0;E9PZP6;Q3UZY6;Q07230;Q6P560;O88245;F7AIG4;F6SU29;A2ARW5;D3Z5P9;E9Q1C9;F6ZZH7;L7N452;E9QA51;B2KF19;A2ARV7;G3UY53;L7N201;Q3TQC3;Q14DI0;E9Q6S4;L7N246;A2AW66;A2ARR6;E9PXW0;A2BFU4;Q7TPX5;L7N212;…	Krueppel-like factor 3;Zinc finger protein 48;Zinc finger protein 184;Zinc finger protein 287;Krueppel-like factor 12;Krueppel-like factor 5;Krueppel-like factor 7;Zinc finger protein 394;Zinc finger protein 76;Zinc finger and SCAN domain-containing protein 2;Zinc finger protein 182;Zinc finger protein 120;Zinc finger protein 431;Zinc finger and SCAN domain-containing protein 20	AW146154;Zfp931;Gm14410;Gm6871;Zfp958;Zfp933;Gm4631;Gm14305;Gm14434;Gm14412;Gm14419;Gm10324;Gm14295;Klf3;Zfp712;Znf48;Zfp184;Znf287;Zfp605;Klf12;Gm5595;Klf5;Zscan22;Zfp248;Zfp663;Zfp619;Klf7;Znf394;Znf76;Zfp97;Zfp956;Zscan2;Znf182;Gm10139;Gm10772;Zfp125;Gm14393;Zfp629;Gm10323;EU599041;Zfp640;Gm14399;Zfp523;Gm14401;Gm2381;Zfp934;Zfp935;Gm17067;Gm14322;Gm14418;Zfp263;Gm14403;AI987944;Zfp120;Gm14406…
27.0437	NaN	26.9594	26.7964	27.2474	27.1899	27.6736	27.1734	0.764237	Q64373;A2AHX9;Q9QWX2;Q64373-3;Q64373-4;Q64373-2	Bcl-2-like protein 1	Bcl2l1
30.6444	30.6576	30.9813	30.9011	30.8605	30.4409	30.7126	30.6264	1.09885	Q80U87;A2AI52	Ubiquitin carboxyl-terminal hydrolase 8;Ubiquitin carboxyl-terminal hydrolase	Usp8
NaN	NaN	NaN	NaN	NaN	NaN	NaN	27.7568	NaN	Q923J1;A2AI57	Transient receptor potential cation channel subfamily M member 7	Trpm7
26.5905	26.7374	26.4355	26.6266	26.5638	26.7636	26.8534	26.5681	0.939702	A2AIH8;Q9D711	Pirin	Pir
27.159	NaN	27.146	27.4186	27.123	27.1799	27.1653	NaN	1.06079	A2AIV2;E9PZY8	Protein virilizer homolog	Kiaa1429;1110037F02Rik
28.7543	28.6339	28.8529	28.8235	28.5345	28.3741	28.2376	28.4777	1.28358	A2AIX1;E9QAT4;F7BPW6		Sec16a
25.4696	24.969	25.186	25.2428	24.8612	24.9936	NaN	25.0107	1.19888	A2AJ15;A2AJ14	Endoplasmic reticulum mannosyl-oligosaccharide 1,2-alpha-mannosidase	Man1b1
30.429	30.5177	30.3883	30.4197	30.3451	30.4456	30.425	30.3563	1.03217	A2AJ72;Q3TIX6		Fubp3
NaN	NaN	NaN	NaN	23.1922	NaN	NaN	NaN	NaN	Q80UU2;A2AJG0	Ribonuclease P protein subunit p38	Rpp38
26.9129	26.6834	27.0389	26.9802	26.6991	27.4525	27.0371	26.8514	0.929048	O70311;A2AJH3;Q8CFK1	Glycylpeptide N-tetradecanoyltransferase 2;Glycylpeptide N-tetradecanoyltransferase	Nmt2
30.4476	30.519	30.4709	30.4974	30.5196	30.5871	30.6396	30.565	0.936857	A2AJI0;A2AJI0-2;F6WF36	MAP7 domain-containing protein 1	Map7d1
NaN	25.1712	NaN	NaN	NaN	25.1919	NaN	24.7445	1.15109	Q3UV70;A2AJP9;A8Y5Q0;A2AJQ0	[Pyruvate dehydrogenase [acetyl-transferring]]-phosphatase 1, mitochondrial	Pdp1
NaN	24.7143	24.52	24.605	NaN	NaN	NaN	NaN	NaN	O35206;A2AJY2;A2AJY7;A2AJY5	Collagen alpha-1(XV) chain;Restin	Col15a1
NaN	NaN	NaN	NaN	NaN	22.975	NaN	NaN	NaN	A2AKG8;E9PYJ6	Focadhesin	Focad
25.364	NaN	NaN	25.5703	25.6136	26.1153	26.0202	NaN	0.73244	Q9D1G5;A2AKH7;Q8JZX5	Leucine-rich repeat-containing protein 57	Lrrc57
NaN	NaN	NaN	NaN	NaN	NaN	NaN	25.1673	NaN	A2AKQ3;V9GX08;Q8BX24;A2AKQ0		Slc35d1
32.461	32.5244	32.5251	32.4773	32.403	32.3888	32.564	32.36	1.04826	A2AKU9;A2AKV2;A2AKV3;A2AKV1	ATP synthase subunit gamma	Atp5c1
NaN	NaN	NaN	NaN	NaN	NaN	NaN	24.3198	NaN	Q8K1E6;A2AKV7;A2AKV6	Alpha-ketoglutarate-dependent dioxygenase alkB homolog 3	Alkbh3
25.1892	25.1752	25.2596	NaN	NaN	NaN	NaN	24.689	1.43296	Q5HZI9;G3UYJ3;A2AKV9;A2AKW0	Solute carrier family 25 member 51	Slc25a51
34.0547	34.0096	34.0664	33.9945	33.9059	34.0255	34.0223	34.0951	1.01333	Q8BG05;A2AL12	Heterogeneous nuclear ribonucleoprotein A3	Hnrnpa3
29.5336	29.5544	29.4596	29.5423	29.6121	29.626	29.6654	30.0037	0.867945	Q8C0I1;A2AL50;H3BKN2;A2AL49	Alkyldihydroxyacetonephosphate synthase, peroxisomal	Agps
31.4849	31.5034	31.4253	31.4922	31.6119	31.6581	31.5245	31.5935	0.919837	Q8BSY0;A2AL85;Q8CBM2	Aspartyl/asparaginyl beta-hydroxylase	Asph
NaN	NaN	NaN	NaN	25.1121	NaN	NaN	NaN	NaN	P09925;V9GXE6;A2ALA6	Surfeit locus protein 1	Surf1
NaN	NaN	NaN	NaN	NaN	NaN	NaN	22.2482	NaN	Q3V0C5;A2ALR8;A2ALR9;Q3V0C5-4;Q3V0C5-3;Q3V0C5-5;Q3V0C5-2	Ubiquitin carboxyl-terminal hydrolase 48	Usp48
27.4975	27.5662	27.7312	27.5933	27.083	27.2697	27.2675	26.4852	1.48524	A2ALW5;A2ALW5-2	DnaJ homolog subfamily C member 25	Dnajc25
NaN	NaN	NaN	NaN	NaN	NaN	NaN	NaN	NaN	A2AMH3;A2AMH5;A2AMH4;Q6X893;Q6X893-2	Choline transporter-like protein 1	Slc44a1
29.7831	29.7697	29.7472	29.8101	29.7725	29.8092	29.6315	29.8774	1.00338	Q80XI3;A2AMI2;Q80XI3-3;Z4YKC4;Q80XI3-2;Q80XI3-4;A2AMI7	Eukaryotic translation initiation factor 4 gamma 3	Eif4g3
26.39	26.2788	26.6963	26.3927	26.2422	26.3829	26.4815	26.717	0.988662	Q99L43;A2AMQ5;F6S4G2	Phosphatidate cytidylyltransferase 2;Phosphatidate cytidylyltransferase	Cds2
28.8008	28.4253	28.6904	28.713	28.6738	28.9729	28.8899	28.7536	0.89182	Q91VX2;A2AMY5	Ubiquitin-associated protein 2	Ubap2
31.1341	31.1775	31.2694	31.2114	31.2072	31.4067	31.4136	31.377	0.899363	A2AN08;A2AN08-5;A2AN08-3	E3 ubiquitin-protein ligase UBR4	Ubr4
25.9877	26.4882	NaN	NaN	26.1673	26.4339	26.2265	26.0109	1.01981	A2ANY6;J3QMC5	Midasin	Mdn1
28.3997	28.4694	27.8108	28.1214	27.6519	NaN	NaN	NaN	1.46249	O54879;A2AP78;G5E920	High mobility group protein B3	Hmgb3;Gm6104
30.3824	30.299	30.3376	30.3172	30.3063	NaN	29.7132	NaN	1.25206	Q8BYK8;A2AP88	Zinc finger CCCH domain-containing protein 6	Zc3h6
29.2605	28.8375	28.7803	28.9477	28.8674	28.9539	29.0866	29.313	0.933858	A2APB8	Targeting protein for Xklp2	Tpx2
NaN	NaN	NaN	NaN	NaN	NaN	NaN	26.0282	NaN	A2API8;O54931-2;O54931;O54931-5;O54931-4	A-kinase anchor protein 2	Akap2
31.9484	31.8848	31.8252	31.7856	31.891	32.0255	31.6312	32.0674	0.970786	P15379;P15379-2;Q3U8S1;A2APM5;A2APM3;A2APM4;E9QKM8;Q80X37;A2APM1;A2APM2;P15379-3;P15379-6;P15379-11;P15379-5;P15379-10;P15379-9;P15379-4;P15379-8;P15379-7	CD44 antigen	Cd44
NaN	NaN	NaN	NaN	NaN	NaN	NaN	26.8616	NaN	P21460;A2APX3	Cystatin-C	Cst3
NaN	NaN	NaN	22.799	NaN	NaN	NaN	NaN	NaN	A2APY7;A2APY7-2	NADH dehydrogenase [ubiquinone] 1 alpha subcomplex assembly factor 5	Ndufaf5
27.3115	27.4633	27.5931	27.4692	27.2307	27.5538	27.5084	27.3388	1.03623	A2APZ3;Q8R2U4	N-terminal Xaa-Pro-Lys N-methyltransferase 1;N-terminal Xaa-Pro-Lys N-methyltransferase 1, N-terminally processed	Ntmt1
NaN	25.7262	25.5642	25.6052	NaN	25.3708	NaN	25.5774	1.11556	A2AQ19	RNA polymerase-associated protein RTF1 homolog	Rtf1
27.9164	27.9664	28.0624	28.0174	28.3164	28.1708	28.2819	28.2247	0.836362	Q80TY0;A2AQ43;A2AQ44;A2AQ42;A2AQ45;A2AQ41;Q80TY0-2;Q80TY0-3;Q80TY0-5;Q80TY0-4;F6VVN1;A2AQ39	Formin-binding protein 1	Fnbp1
32.7787	32.6163	32.8218	32.646	32.9457	33.4791	33.3633	33.3466	0.674563	A2AQ53;Q61554	Fibrillin-1	Fbn1
26.9515	26.5161	26.6851	26.3367	25.9684	26.5787	25.8321	25.9365	1.45743	Q8CFQ3;A2AQA7	Intron-binding protein aquarius	Aqr
27.3606	27.6002	27.5508	27.4875	NaN	27.7495	26.8332	27.3126	1.14977	A2AR02	Peptidyl-prolyl cis-trans isomerase G	Ppig
26.5723	26.6865	26.6375	26.4295	26.4549	26.3688	26.5099	26.4051	1.10709	Q8BKH7;A2AR12;Q8BKH7-2;A2AR15;Q8BKH7-3	Target of rapamycin complex 2 subunit MAPKAP1	Mapkap1
NaN	NaN	NaN	NaN	NaN	NaN	NaN	NaN	NaN	Q3UDF0;A2AR26		Slc2a6
26.7209	27.0544	26.8176	26.771	NaN	NaN	NaN	NaN	NaN	A2ARA8;G3UYV5;G3UYN5	Integrin alpha-8;Integrin alpha-8 heavy chain;Integrin alpha-8 light chain	Itga8
NaN	NaN	NaN	NaN	NaN	NaN	26.348	NaN	NaN	Q9WUR9;A2ARF6;A2ARF5	Adenylate kinase 4, mitochondrial	Ak4
26.6409	26.916	26.8051	26.997	26.9533	27.0425	27.0223	27.1246	0.873013	Q8C0L0;A2ARI0	Thioredoxin-related transmembrane protein 4	Tmx4
NaN	NaN	NaN	26.319	26.4263	NaN	NaN	NaN	0.928324	A2ARP1;A2ARP1-3;A2ARP1-2;Q6ZQB6;F6RMX0;F6Q5C6;F7AST3;E9Q9J4;A2ARP1-7;Q6ZQB6-2;Q6ZQB6-3	Inositol hexakisphosphate and diphosphoinositol-pentakisphosphate kinase 1;Inositol hexakisphosphate and diphosphoinositol-pentakisphosphate kinase 2	Ppip5k1;Ppip5k2
30.158	30.0797	30.1026	30.181	30.2256	30.089	30.343	30.1309	0.954753	Q9QYR6;A2ARP8;Q9QYR6-2	Microtubule-associated protein 1A;MAP1A heavy chain;MAP1 light chain LC2	Map1a
29.4553	29.1436	29.702	29.0988	29.0917	28.74	28.9996	28.278	1.4872	P84102;A2ARQ2;D6RCY2;D6RIP7;A2ARQ4	Small EDRK-rich factor 2	Serf2
31.3274	31.4809	31.3276	31.3665	31.1377	31.0605	31.2723	31.2454	1.14601	P28660;A2AS98;P28660-2	Nck-associated protein 1	Nckap1
26.5119	26.6132	26.6799	26.4848	26.4451	26.2004	26.2265	26.2161	1.23151	A2AT37		Upf2
31.6628	31.4918	31.6305	31.6759	31.6286	31.7338	31.5972	31.727	0.961661	Q99JX3;A2ATI9;A2ATI8;A2ATI6;Q99JX3-2	Golgi reassembly-stacking protein 2	Gorasp2
31.1705	31.2451	31.253	31.2156	31.19	30.8097	31.1891	30.9438	1.1391	Q64012;Q64012-2;A2AU61;A2AU62;A2AU60	RNA-binding protein Raly	Raly
25.9826	NaN	26.0442	25.8128	NaN	NaN	NaN	26.0135	0.954643	P70399;A2AU89;A2AU91;P70399-3;P70399-2;A2AU90	Tumor suppressor p53-binding protein 1	Tp53bp1;Trp53bp1
31.19	31.0967	31.1682	31.1848	31.1748	30.9007	31.1334	31.0496	1.06829	Q9CYZ2;A2AUD5;Q3TAI4;V9GWU5;Q3TUJ9;Q8BKP1;F6VQ81	Tumor protein D54	Tpd52l2
28.9574	28.974	28.805	28.8968	28.9114	28.9245	29.0801	29.046	0.944616	P60904;A2AUE1;G5E8T0	DnaJ homolog subfamily C member 5	Dnajc5
27.9879	27.8457	27.8694	28.0792	28.0918	27.8877	28.0136	27.8953	0.981765	A2AUK7;A2AUK8;Q9Z2H5-3;Q9Z2H5-2;Q9Z2H5;A2AUK5;A2AUK6	Band 4.1-like protein 1	Epb4.1l1;Epb41l1
NaN	NaN	NaN	NaN	NaN	NaN	NaN	25.4919	NaN	Q3UHC7;F6RK07;A2AUX5;A2AUX3;B7ZD29;Q3UHC7-2;Q3UHC7-4;Q3UHC7-3;F6QQP6	Disabled homolog 2-interacting protein	Dab2ip
34.8097	34.818	34.8155	34.7751	34.9056	34.8895	34.9124	34.8812	0.937831	Q99PL5;A2AVJ7	Ribosome-binding protein 1	Rrbp1
NaN	NaN	NaN	NaN	NaN	NaN	NaN	23.5861	NaN	Q4VGL6;P0C090;H7BX02;A2AVP4	Roquin-1;Roquin-2	Rc3h1;Rc3h2
30.2824	30.3927	30.1521	30.2332	30.0677	30.3375	30.611	30.5026	0.923638	Q08943;A2AW05;Q08943-2	FACT complex subunit SSRP1	Ssrp1
28.7613	28.6075	28.8141	28.9371	28.2906	28.2573	28.1455	28.5257	1.39014	Q60767;A2AW86	Lymphocyte antigen 75	Ly75
28.935	28.8967	28.8817	28.9614	29.0999	28.7927	28.9963	28.7819	1.00069	A2AWA9;A2AWA9-2	Rab GTPase-activating protein 1	Rabgap1
26.7891	26.5795	26.5989	26.874	26.6295	26.7924	NaN	26.8889	0.959336	P59326;A2AWN8	YTH domain-containing family protein 1	Ythdf1
28.1125	28.1348	28.0199	28.0605	27.8593	27.8865	28.0745	28.2849	1.03931	P25976;A2AWT6;A2AWT7;A2AWT5;P25976-2	Nucleolar transcription factor 1	Ubtf
NaN	NaN	NaN	NaN	NaN	NaN	NaN	24.4983	NaN	P35991;A2BDW0	Tyrosine-protein kinase BTK	Btk
27.8873	27.8839	27.8676	28.019	27.7828	NaN	NaN	NaN	1.09555	A2BDX0;Q9Z103	Activity-dependent neuroprotector homeobox protein	Adnp
NaN	NaN	NaN	NaN	NaN	24.9608	24.9376	24.9919	NaN	A2BDX3	Adenylyltransferase and sulfurtransferase MOCS3;Molybdopterin-synthase adenylyltransferase;Molybdopterin-synthase sulfurtransferase	Mocs3
NaN	27.0695	27.2557	27.4317	26.9189	27.3341	27.05	26.9389	1.14221	A2BE28;A2BE28-2	Ribosomal biogenesis protein LAS1L	Las1l
NaN	NaN	NaN	NaN	NaN	NaN	24.3231	NaN	NaN	A2BE45;Q9R0M3-2;Q9R0M3	Sushi-repeat-containing protein SRPX	Srpx
32.7264	32.7879	32.7111	32.768	32.7006	32.6568	32.572	32.5167	1.09948	Q9EQU5;A2BE93;A2BE92;Q9EQU5-3	Protein SET	Set
27.1456	26.9278	26.9879	26.7918	27.1431	28.0147	27.936	27.9714	0.573146	A2BGI8;Q9D868-2;Q9D868;A2BGI9	Peptidyl-prolyl cis-trans isomerase;Peptidyl-prolyl cis-trans isomerase H	Ppih
27.5814	27.5636	27.5148	27.5976	27.28	27.9087	28.1481	27.6537	0.880701	A2BGN7;Q9D8X0	Protein MANBAL	Manbal
NaN	NaN	NaN	NaN	NaN	NaN	NaN	23.5211	NaN	A2BH06		Rpl11
NaN	26.4941	NaN	NaN	26.1851	26.1796	NaN	26.4805	1.15859	A2BH40;E9QAQ7;A2BH40-4;A2BH40-2;A2BH40-3	AT-rich interactive domain-containing protein 1A	Arid1a
NaN	NaN	NaN	NaN	NaN	NaN	NaN	24.1858	NaN	Q9DC63;A2BHN6;Q9DC63-3;Q9DC63-2	F-box only protein 3	Fbxo3
NaN	NaN	NaN	NaN	NaN	NaN	NaN	26.9113	NaN	A2BI50;A2BI49;A2BI46;A2BI45		Xlr5b;Xlr5a
27.5045	27.3035	27.2518	27.383	27.4348	27.014	27.1092	27.1767	1.13055	P35283;A2CG35	Ras-related protein Rab-12	Rab12
25.1612	24.7743	24.877	24.6042	24.4661	24.6302	24.3666	24.4952	1.28757	A2CG49;F6QYT9;A2CG49-2;A2CG49-7;B1B1A7;A2CG49-9;A2CG49-8	Kalirin	Kalrn
NaN	NaN	NaN	24.0607	NaN	NaN	NaN	NaN	NaN	Q9Z148;A2CG76;Q9Z148-2;Q9Z148-3;A2CG77	Histone-lysine N-methyltransferase EHMT2	Ehmt2
NaN	NaN	NaN	NaN	NaN	25.752	NaN	NaN	NaN	A2CI98	Dystrotelin	Dytn
NaN	NaN	NaN	NaN	26.067	NaN	NaN	NaN	NaN	E9Q2S0;A2RS43		Pcdh7
26.5653	26.6508	26.6012	26.3877	26.7629	NaN	NaN	NaN	0.863549	A2RSJ4	UHRF1-binding protein 1-like	Uhrf1bp1l
NaN	NaN	NaN	NaN	NaN	NaN	NaN	25.3278	NaN	A2RSX9;E9QAY5		Arfip1
26.0337	26.2629	25.9775	NaN	25.9033	27.4595	26.5894	26.9919	0.639644	A2RSY6;A2RSY6-2;A2RSY6-3	TRMT1-like protein	Trmt1l
26.1814	26.1447	26.1034	26.247	26.2309	NaN	26.1714	26.0279	1.01799	A2RTH5		Lcmt1
NaN	NaN	NaN	NaN	26.3349	NaN	NaN	26.067	NaN	P54763;A3KG01;A3KG02;A3KG00;P54763-2	Ephrin type-B receptor 2	Ephb2
25.9601	25.5277	25.9049	25.959	26.0484	26.74	26.4377	25.8735	0.738682	Q6ZQ88;A3KG93;G8JL40;F6Z4I3	Lysine-specific histone demethylase 1A	Kdm1a
28.0305	27.8346	28.0621	27.9306	27.7859	28.5777	28.1539	28.2833	0.849243	A3KGB4	TBC1 domain family member 8B	Tbc1d8b
NaN	NaN	27.9077	27.8812	26.0503	28.215	NaN	NaN	1.6956	A3KGF7;E9PYI3	1-phosphatidylinositol 4,5-bisphosphate phosphodiesterase beta-2;Phosphoinositide phospholipase C	Plcb2
NaN	NaN	NaN	NaN	25.6619	NaN	NaN	NaN	NaN	A3KGF9	Uncharacterized protein C15orf52 homolog
29.6074	29.526	29.6918	29.7671	29.5441	29.5305	29.1186	29.3691	1.19541	Q9D898;A3KGQ6	Actin-related protein 2/3 complex subunit 5-like protein;Actin-related protein 2/3 complex subunit 5	Arpc5l
29.0297	30.355	30.3371	30.24	30.3788	30.792	30.7197	30.8809	0.614549	Q9D8V0-4;A3KGR9	Minor histocompatibility antigen H13	Hm13;H13
NaN	25.902	25.9436	NaN	NaN	26.0495	25.8671	NaN	0.975694	A3KGW5	Probable inactive glycosyltransferase 25 family member 3	Cercam
NaN	NaN	NaN	NaN	NaN	NaN	NaN	23.4966	NaN	A3KMP2;A3KMP2-2	Tetratricopeptide repeat protein 38	Ttc38
27.2195	27.2255	NaN	NaN	27.2284	NaN	NaN	NaN	0.995919	Q8K1L5;G3UZ30;A5A4Y9	Protein phosphatase 1 regulatory subunit 11	Ppp1r11
27.277	26.9751	27.2747	27.2312	27.2373	27.618	27.305	26.8942	0.949918	A6H5Z3;A6H5Z3-2	Exocyst complex component 6B	Exoc6b
NaN	NaN	NaN	NaN	25.5782	NaN	NaN	NaN	NaN	A6H630;A6H630-3;A6H630-4;A6H630-2	UPF0364 protein C6orf211 homolog
27.7779	27.8379	27.783	27.7466	27.731	27.6581	27.529	NaN	1.10725	Q8BG95;A6H644;F6UIT9	Protein phosphatase 1 regulatory subunit 12B;Protein phosphatase 1 regulatory subunit 12	Ppp1r12b
25.9299	25.9062	25.8634	25.7532	25.7442	NaN	25.8859	25.7141	1.05832	A6H8H2;A6H8H2-2;E9Q449	DENN domain-containing protein 4C	Dennd4c
NaN	NaN	NaN	NaN	NaN	NaN	24.4475	NaN	NaN	Q91Y86;A6P3E4;Q7TSJ7;G3X8U9;D3Z1Z4	Mitogen-activated protein kinase 8	Mapk8
32.0879	32.0912	32.0904	32.0324	31.9167	31.9333	32.1983	31.8541	1.07168	A6PW84;Q3V1T4;A2A7Q5;Q3V1T4-3;Q3V1T4-2	Prolyl 3-hydroxylase 1	Lepre1
NaN	NaN	NaN	NaN	NaN	NaN	NaN	24.6757	NaN	Q9CWU6;D6RJ83;A6PWX5;F6V305;A6PWX8;A6PWX9	Ubiquinol-cytochrome-c reductase complex assembly factor 1	Uqcc1
25.8985	25.8519	25.8966	26.4967	25.9945	25.8862	25.8856	25.9436	1.07807	A6X919;A6X919-2	Probable C-mannosyltransferase DPY19L1	Dpy19l1
NaN	NaN	NaN	NaN	NaN	NaN	NaN	27.8911	NaN	Q9CPQ9;A6ZI46		Aldoart1
24.2279	NaN	24.2018	24.1841	24.0123	23.8912	24.4915	23.9585	1.08389	A8C756	Thyroid adenoma-associated protein homolog	Thada
NaN	NaN	NaN	NaN	NaN	NaN	NaN	26.1926	NaN	Q9JL15;A8DIL0	Galectin-8;Galectin	Lgals8
26.407	26.2074	26.251	26.2354	26.0198	26.9839	25.9584	27.318	0.815171	Q9CWS4;A8Y5J3	Integrator complex subunit 11	Cpsf3l
NaN	NaN	NaN	NaN	NaN	NaN	NaN	24.9462	NaN	A8Y5P1;Q8K211	High affinity copper uptake protein 1	Slc31a1
NaN	NaN	NaN	NaN	NaN	NaN	NaN	23.3088	NaN	Q5SS80;B0QZT2;Q5SS80-2	Dehydrogenase/reductase SDR family member 13	Dhrs13
28.4351	28.4237	28.1985	28.4511	28.3603	28.4188	28.4909	28.5259	0.951401	P61022;B0R091	Calcineurin B homologous protein 1	Chp1
NaN	NaN	NaN	25.8987	NaN	NaN	NaN	NaN	NaN	B1APX2;Q3UE31	Uncharacterized protein KIAA0930 homolog	5031439G07Rik
29.0689	29.1845	29.0576	29.0598	29.3304	29.441	29.3899	29.3344	0.822892	Q9D7X3;B1AQF4;Q3V2Y9;H3BKD1;H3BKL8	Dual specificity protein phosphatase 3	Dusp3
29.6457	29.774	29.883	29.842	29.8215	30.0221	29.9111	29.9376	0.909471	Q8CHH9;B1AQZ0;B7ZC46;B1AQY9;Q8CHH9-2	Septin-8	2015-09-08
27.1016	27.115	27.3203	27.0703	27.1144	27.4913	27.488	26.8648	0.94094	P28741;Q3TET1;Q3UI47;B1AQZ2	Kinesin-like protein KIF3A	Kif3a
NaN	28.422	28.4388	NaN	NaN	NaN	NaN	30.9726	0.171681	B1AR13;Z4YKM2;B2RWE3	CDGSH iron-sulfur domain-containing protein 3, mitochondrial	Cisd3
31.4286	31.3715	31.3893	31.4559	31.3913	31.2492	31.338	31.2288	1.07885	Q9QXZ0;E9QA63;B1ARU4;E9PVY8;Q9QXZ0-2;Q9QXZ0-4;E9QNP1	Microtubule-actin cross-linking factor 1	Macf1
NaN	NaN	NaN	NaN	NaN	NaN	NaN	24.0857	NaN	Q9D032;Q9CYZ8;Q9CYZ8-2;D6RG78;B1AS34;Q3U4B1;B1AS37;Q9D032-2	Single-stranded DNA-binding protein 3;Single-stranded DNA-binding protein 2	Ssbp3;Ssbp2;Ssbp4
NaN	NaN	NaN	NaN	NaN	21.3219	NaN	NaN	NaN	Q2VPQ9;Q2VPQ9-2;V9GXH6;B1ASC8;V9GX42	Chromatin modification-related protein MEAF6	Meaf6
27.0047	26.7791	27.1697	26.9778	26.4847	27.0674	27.0096	26.8708	1.09028	P52332;B1ASP2	Tyrosine-protein kinase JAK1;Tyrosine-protein kinase	Jak1
26.8657	26.4387	26.9652	26.8129	26.6933	26.6116	26.8083	26.859	1.0193	Q9DCZ4;Q9D186;B1ASQ2	Apolipoprotein O	Apoo
NaN	NaN	NaN	NaN	NaN	NaN	NaN	25.8118	NaN	Q5NCF2;B1ASW5	Trafficking protein particle complex subunit 1	Trappc1
NaN	NaN	NaN	NaN	NaN	NaN	NaN	24.9621	NaN	Q920Q6;B1AT10;B1AT13;Q920Q6-3;Q920Q6-2	RNA-binding protein Musashi homolog 2	Msi2
29.4842	29.4571	29.585	29.5425	29.4921	29.3366	29.2898	29.2487	1.12928	Q9D0M1;B1AT82;B1AT84	Phosphoribosyl pyrophosphate synthase-associated protein 1	Prpsap1
30.2597	30.1986	30.2126	30.1861	30.0661	29.8893	30.2632	29.9699	1.12282	Q60631;B1AT92;Q60631-2	Growth factor receptor-bound protein 2	Grb2
29.3446	29.3026	29.3551	29.4071	29.4943	29.2784	29.2103	29.1551	1.04814	P47740;B1AV77;B1ATI0	Fatty aldehyde dehydrogenase;Aldehyde dehydrogenase	Aldh3a2
27.5712	27.2092	27.2768	27.258	27.1199	27.2626	27.3796	27.3476	1.03625	Q80Y81;B1ATP7;Q80Y81-2	Zinc phosphodiesterase ELAC protein 2	Elac2
27.179	27.1357	27.3223	27.2284	27.6017	27.3122	27.5251	27.293	0.860561	Q9WVD4;B1ATV0	H(+)/Cl(-) exchange transporter 5	Clcn5
30.2613	30.4218	30.2429	30.1822	30.2605	30.4541	30.3211	30.3509	0.952902	Q99LI8;B1ATZ0;B1ATZ1;Q3UMA3;B1ATY9	Hepatocyte growth factor-regulated tyrosine kinase substrate	Hgs
31.0145	30.9974	31.0093	31.0441	31.1989	31.2629	31.2159	31.1605	0.874648	Q9Z0X1;B1AU25	Apoptosis-inducing factor 1, mitochondrial	Aifm1
27.1536	27.2987	27.1069	27.2533	27.3541	26.6745	27.0288	26.669	1.20708	Q9CWP6;B1AU74;Q9CWP6-2;Q9CWP6-3;Q9CWP6-4	Motile sperm domain-containing protein 2	Mospd2
29.7069	29.8242	29.6713	29.5932	29.4775	29.5597	29.7121	29.3215	1.13383	Q99MD9;B1AU76;B1AU75;Q99MD9-2	Nuclear autoantigenic sperm protein	Nasp
28.5134	28.595	28.3843	28.6343	28.7997	28.5678	28.7653	28.7661	0.8748	Q3UKV0;B1AUN3;B1AUN2		Eif2b3
30.0194	30.1317	30.2427	30.1064	30.1213	30.1851	30.1859	30.2355	0.961328	Q61191;B1AUX2	Host cell factor 1;HCF N-terminal chain 1;HCF N-terminal chain 2;HCF N-terminal chain 3;HCF N-terminal chain 4;HCF N-terminal chain 5;HCF N-terminal chain 6;HCF C-terminal chain 1;HCF C-terminal chain 2;HCF C-terminal chain 3;HCF C-terminal chain 4;HCF C-terminal chain 5;HCF C-terminal chain 6	Hcfc1
NaN	NaN	NaN	NaN	NaN	NaN	NaN	24.6916	NaN	Q9QY36;B1AUY7;B1AUY8	N-alpha-acetyltransferase 10	Naa10
26.041	NaN	NaN	NaN	NaN	NaN	NaN	25.9438	1.0697	O70583;B1AV01;O70583-3;O70583-2;B1AUZ9	E3 ubiquitin-protein ligase Midline-1	Mid1
NaN	NaN	NaN	NaN	NaN	NaN	26.8749	29.8459	NaN	B1AVH7	TBC1 domain family member 2A	Tbc1d2
NaN	NaN	NaN	NaN	NaN	NaN	NaN	25.964	NaN	B1AVZ0	Uracil phosphoribosyltransferase homolog	Uprt
32.0672	32.0161	32.0361	32.1779	32.2306	32.0919	32.4761	32.1068	0.899986	B1AWE0;Q6PFA2;O08585;B1AWE1;B1AWD8;B1AWD9	Clathrin light chain A	Clta
26.2129	26.4496	26.3096	26.3011	26.2927	26.6182	26.5519	26.1707	0.939474	Q6VVW5;B1AWI7;Q6VVW5-2;F6YT88;Q6VVW5-3	Atrial natriuretic peptide receptor 2;Guanylate cyclase	Npr2
NaN	NaN	NaN	NaN	23.9774	NaN	NaN	NaN	NaN	Q60954;P97367;V9GXB5;Q148B2;H3BLB6;Q3TYM2;B1AWK4;P97368-2;Q60954-3;P97368;P97367-3;P97367-2;Q60954-2;P97367-4	Homeobox protein Meis1;Homeobox protein Meis2;Homeobox protein Meis3	Meis1;Meis2;Meis3
26.7686	26.6944	26.9456	26.7326	26.9972	26.4811	26.379	26.3326	1.17921	Q2TPA8;B1AX78;B1AX77	Hydroxysteroid dehydrogenase-like protein 2	Hsdl2
27.9604	28.1526	28.0345	28.1356	27.9415	28.0565	28.0582	28.1113	1.02023	B1AY13;E9PV45	Ubiquitin carboxyl-terminal hydrolase 24;Ubiquitin carboxyl-terminal hydrolase	Usp24
28.5306	28.2975	28.6922	28.6506	28.3664	28.1778	28.1172	27.9126	1.3188	Q9DC11;B1AY85;B1AY86	Plexin domain-containing protein 2	Plxdc2
NaN	NaN	NaN	NaN	NaN	NaN	NaN	29.4469	NaN	Q9Z0T9;B1AYG7;B1AYG6	Integrin beta-6;Integrin beta	Itgb6
25.6027	25.473	25.6974	25.228	25.4119	25.5045	25.4789	25.2321	1.0669	Q8C5N3;B1AYU4;B1AYU7;Q8C5N3-2;A2AK44;A2AK42	Pre-mRNA-splicing factor CWC22 homolog	Cwc22;Gm13695;Gm13697
26.0086	25.7947	25.638	25.9825	25.6982	NaN	NaN	NaN	1.11555	Q3UMF0;Q3UMF0-2;B1AZ15;B1AZ14;Q3UMF0-3;Q3UMF0-4;B1AZ26	Cordon-bleu protein-like 1	Cobll1
25.9783	26.2378	26.3186	26.1305	26.3409	26.3462	26.4745	26.489	0.843027	Q8BKX1;Q8BKX1-2;B1AZ46;Q8BKX1-3;Q8BKX1-4	Brain-specific angiogenesis inhibitor 1-associated protein 2	Baiap2
28.6515	28.5856	28.8375	28.6861	28.5147	28.7098	28.7479	28.7229	1.0114	B1AZI6	THO complex subunit 2	Thoc2
27.5553	27.5549	27.4291	27.4455	27.5066	27.4823	27.4421	27.4853	1.01194	B1AZP2;B1AZP2-2;I1E4X0;F6YMR0;E9PUF2;B7ZNS2;B1AZP2-3;H3BJW9	Disks large-associated protein 4	Dlgap4
NaN	NaN	NaN	25.8321	NaN	NaN	NaN	NaN	NaN	Q9DB50;B1B0F6;Q3TIV9;Q8BW87	AP-1 complex subunit sigma-2	Ap1s2
NaN	28.2781	NaN	28.8148	29.6745	29.6363	29.4839	29.3245	0.505804	Q6PDN3;B1B1A8;Q6PDN3-2;Q6PDN3-3	Myosin light chain kinase, smooth muscle;Myosin light chain kinase, smooth muscle, deglutamylated form	Mylk
24.574	NaN	NaN	NaN	NaN	NaN	NaN	NaN	NaN	Q9JIP4;B1PL19	Pannexin-1	Panx1
NaN	NaN	NaN	NaN	NaN	NaN	25.2339	NaN	NaN	Q01063;B1PSD9;B2KF57;B2KF84;F6QFD1;E9PVU7;Q01063-2;Q01063-3;A6XDB1;A6XDB0	cAMP-specific 3,5-cyclic phosphodiesterase 4D	Pde4d
27.3562	27.2266	27.4762	27.4052	27.4826	27.9293	27.6968	27.7046	0.791535	B2KGA7;Q505B7;Q505B7-2	Protein archease	Zbtb8os
27.2209	27.1241	27.0657	26.9183	27.0686	27.47	27.3606	27.1298	0.885768	B2KGF0;Q8VEE0;M0QWJ2;M0QWQ0	Ribulose-phosphate 3-epimerase	Rpe
24.8505	NaN	NaN	NaN	NaN	NaN	NaN	NaN	NaN	Q8BQZ5;B2LVG5;B2LVG6;E0CXT7;M0QWM8;Q8BQZ5-3;Q8BQZ5-2	Cleavage and polyadenylation specificity factor subunit 4	Cpsf4
26.5275	27.0223	26.7839	26.2721	26.7645	NaN	26.9337	26.8067	0.880554	B2M1R6;P61979-3;H3BKD0;D3Z5X4	Heterogeneous nuclear ribonucleoprotein K	Hnrnpk;Gm7964
NaN	28.0578	28.1496	NaN	28.1698	28.2463	28.3441	28.0678	0.930901	Q9D1L0;B2RPU8;D3Z5B1	Coiled-coil-helix-coiled-coil-helix domain-containing protein 2, mitochondrial	Chchd2;Zbed5
32.3266	32.3184	32.3121	32.3587	32.1479	32.1897	32.0203	32.1696	1.14637	B2RQC6;E9QAI5;G3UWN2;B2RQC6-2	CAD protein;Glutamine-dependent carbamoyl-phosphate synthase;Aspartate carbamoyltransferase;Dihydroorotase	Cad
NaN	NaN	NaN	23.5385	NaN	NaN	NaN	NaN	NaN	Q3UH60;B2RQC7;D3Z5G8;Q3UH60-2	Disco-interacting protein 2 homolog B	Dip2b
30.4579	30.2079	30.22	30.3122	30.2936	30.3507	30.2462	30.2736	1.00589	B2RQS1;Q9ERG2	Striatin-3	Strn3
27.8935	28.0341	28.0712	28.0501	27.7436	27.6833	27.456	28.1185	1.19904	B2RQY6		BC035947
NaN	NaN	NaN	NaN	23.1603	NaN	NaN	NaN	NaN	B2RR83	Probable ATP-dependent RNA helicase YTHDC2	Ythdc2
27.5017	27.3933	27.618	27.461	27.3993	27.3689	26.9779	27.0418	1.22818	Q9JMH9;Q9JMH9-6;E9Q405;K3W4L0;B2RRE2;E9QAX2;Q9JMH9-5;Q9JMH9-7;Q9JMH9-2;Q9JMH9-1;Q9JMH9-4;E9QA74	Unconventional myosin-XVIIIa	Myo18a
31.5877	31.3886	31.2065	31.4743	31.4961	31.7812	31.4504	31.5632	0.895987	B2RRE7	OTU domain-containing protein 4	Otud4
26.9067	26.4117	26.6991	NaN	26.4353	27.4519	27.1157	26.8583	0.816316	Q8CHG3;E0CYI9;E9PWI6;B2RSU7	GRIP and coiled-coil domain-containing protein 2	Gcc2
NaN	NaN	NaN	NaN	NaN	NaN	NaN	23.4422	NaN	Q8C0D4;B2RUJ8;S4R2V0;S4R1B0;S4R203;S4R248;S4R221	Rho GTPase-activating protein 12	Arhgap12
NaN	NaN	NaN	NaN	NaN	27.5552	NaN	28.1837	NaN	B2RW38		Ccdc147
26.5217	27.1367	26.7626	26.6911	26.7859	26.5916	26.505	26.4019	1.15423	B2RWS6;P45481;F8VPR5	Histone acetyltransferase p300;CREB-binding protein	Ep300;Crebbp
27.8836	27.6553	27.5243	27.8184	27.6437	27.5085	27.7186	27.6469	1.06509	B2RXC1	Trafficking protein particle complex subunit 11	Trappc11
NaN	NaN	NaN	NaN	23.7799	NaN	NaN	NaN	NaN	B2RXC6	DNA-directed RNA polymerase	Polr3a
26.5176	26.4236	26.6595	26.5695	26.6952	26.3368	26.5862	26.1743	1.06764	Q8BVU0;B7ZWM8;B2RXP1;E9QAU9	Leucine-rich repeat and calponin homology domain-containing protein 3	Lrch3
28.1601	28.3572	28.1161	28.2665	28.0184	28.0918	28.2451	28.1173	1.07686	B2RXW8;B2RXQ2		Ppfia1
26.1031	26.3188	NaN	NaN	NaN	NaN	NaN	NaN	NaN	Q3UTJ2-2;Q3UTJ2-5;Q3UTJ2;B2RXQ9;D3Z080;E9Q0B0;B7ZWM6;B9EKP8;Q3UTJ2-4;E9Q8K9;Z4YJR7;Q3UTJ2-3	Sorbin and SH3 domain-containing protein 2	Sorbs2
27.6574	27.764	27.6943	27.5409	27.8872	27.5301	28.1222	27.8374	0.882657	B2RXR6;E9QNQ2;J3QK13	Serine/threonine-protein phosphatase 6 regulatory ankyrin repeat subunit B	Ankrd44
31.0892	31.1043	31.1589	31.1616	30.7986	30.8672	30.8429	30.9781	1.19483	B2RXS4	Plexin-B2	Plxnb2
27.4433	27.2664	27.2122	27.4109	27.3019	27.1961	27.1183	27.2336	1.08728	B2RY04	Dedicator of cytokinesis protein 5	Dock5
29.9562	29.9906	30.1064	30.0806	30.0271	29.9687	30.0418	29.9802	1.0203	B2RY56;S4R2B0	RNA-binding protein 25	Rbm25
38.0924	38.1049	38.1053	38.1086	38.1029	38.1911	38.1468	38.1665	0.966589	Q8BTM8;B7FAU9;B7FAV1	Filamin-A	Flna
27.6761	27.6429	27.6295	27.6936	27.8225	27.0567	27.5783	27.6936	1.08881	Q91W39;B7ZC24	Nuclear receptor coactivator 5	Ncoa5
NaN	NaN	NaN	NaN	NaN	NaN	24.6381	NaN	NaN	B7ZCA9;Q5SSK3	Transcription elongation factor, mitochondrial	Tefm
29.9331	29.8104	29.9228	30.0781	29.9581	30.0902	29.9775	30.0938	0.937051	Q8CBW3;Q8CBW3-4;B7ZCU4;B7ZCU3;B7ZCU0;Q8CBW3-2;Q8CBW3-3;B7ZCU2;B7ZCU5;J3QNK8;Q8CBW3-5	Abl interactor 1	Abi1
NaN	NaN	NaN	NaN	NaN	NaN	22.9808	NaN	NaN	B7ZMP1	Probable Xaa-Pro aminopeptidase 3	Xpnpep3
29.3654	29.9432	29.9371	30.0873	31.0871	31.4074	31.222	31.5917	0.355076	B7ZNL3		Tpm1
NaN	26.5588	NaN	NaN	NaN	27.1708	26.9888	26.8649	0.732364	Q3V4B5;B7ZNP3	COMM domain-containing protein 6	Commd6
27.803	27.7439	27.8771	27.6453	27.5646	27.4908	27.6034	27.6253	1.14576	Q80TH2;Q80TH2-2;B7ZNX6;Q80TH2-1	Protein LAP2	Erbb2ip
25.5823	NaN	NaN	25.5388	NaN	NaN	NaN	25.2701	1.22302	Q65Z40;B7ZP47;F6YCH1	Wings apart-like protein homolog	Wapal
29.717	29.8372	29.8757	29.7886	29.8437	29.7759	29.9147	29.8841	0.965953	Q6ZQ08;B7ZWL1;Q6ZQ08-2;Q6ZQ08-4	CCR4-NOT transcription complex subunit 1	Cnot1
26.2866	26.201	26.2636	26.4009	26.3089	NaN	NaN	NaN	0.985635	Q6QD59;B8JJI4	Vesicle transport protein SEC20	Bnip1
NaN	NaN	NaN	NaN	NaN	NaN	22.8313	NaN	NaN	P43135;Q60632;B8JJI9;F7CII1;D3YYP4;Q32NY6	COUP transcription factor 2;COUP transcription factor 1	Nr2f2;Nr2f1
NaN	NaN	NaN	NaN	NaN	NaN	NaN	25.1046	NaN	P97801;B8JJX7	Survival motor neuron protein	Smn1
30.5805	30.6815	30.6502	30.6512	30.562	30.6709	30.6003	30.6041	1.02209	B9EHJ3;P39447	Tight junction protein ZO-1	Tjp1
30.3467	30.3813	30.423	30.453	30.2769	30.3504	30.3418	30.3745	1.04616	B9EJ54		Nup205
25.7976	26.3268	25.9903	25.9465	26.102	26.2094	26.2085	25.6522	0.980966	B9EJ80		Pdzd8
27.352	27.1635	27.5947	27.3855	27.3302	27.1601	27.079	27.0399	1.16605	B9EJ86;G3X9N6	Oxysterol-binding protein	Osbpl8
26.0942	25.7854	25.677	25.8375	25.7134	25.9517	25.9857	25.9587	0.963362	B9EJR8		Heatr2
NaN	NaN	NaN	NaN	NaN	NaN	NaN	20.4584	NaN	Q8C176;B9EJX5	Transcription initiation factor TFIID subunit 2	Taf2
NaN	NaN	30.2243	NaN	28.7121	NaN	NaN	NaN	2.85245	B9EKI3;D6RJK7	TATA element modulatory factor	Tmf1
28.8221	28.9628	28.9044	28.9408	28.9428	28.9236	29.1257	28.8946	0.956509	Q80TL7;B9EKJ3;Q80TL7-2	Protein MON2 homolog	Mon2
NaN	NaN	NaN	NaN	NaN	NaN	NaN	24.8999	NaN	Q6ZPY7;B9EKS2	Lysine-specific demethylase 3B	Kdm3b
NaN	NaN	NaN	NaN	23.313	NaN	NaN	NaN	NaN	Q9D0N7;D3YTP6;D3Z616	Chromatin assembly factor 1 subunit B	Chaf1b
NaN	NaN	NaN	NaN	NaN	NaN	NaN	25.6558	NaN	D3YTR3;E9PUA0;Q3UE17;Q05A36;Q69Z36;G3UYU0;F8WJD6;Q3UE17-2	RNA-binding protein MEX3D;RNA-binding E3 ubiquitin-protein ligase MEX3C;RNA-binding protein MEX3B	Mex3d;Mex3c;Mex3b;Mex3a
26.7756	26.6698	26.941	26.6031	NaN	26.4558	26.4299	25.8773	1.40741	Q9Z2D8;F6WZH1;D3YTR5;D3YTR4;Q9Z2D8-2	Methyl-CpG-binding domain protein 3	Mbd3
29.919	29.9146	29.9987	30.026	29.7629	29.9553	29.9603	30.0389	1.02472	Q9R0P6;D3YWT0;D3Z569;D3YTS1	Signal peptidase complex catalytic subunit SEC11A	Sec11a
28.3108	28.2188	28.3638	28.2046	28.2918	28.1933	28.1467	28.34	1.02211	Q9D7B6;D3YTT4	Isobutyryl-CoA dehydrogenase, mitochondrial	Acad8
NaN	NaN	NaN	NaN	26.3752	NaN	NaN	NaN	NaN	Q9DBS9;F8WH20;D3Z194;D3YTT6	Oxysterol-binding protein-related protein 3;Oxysterol-binding protein	Osbpl3
NaN	25.9271	NaN	NaN	NaN	NaN	NaN	NaN	NaN	Q8CD15;D3YTU3;Q8CCK9	Bifunctional lysine-specific demethylase and histidyl-hydroxylase MINA	Mina
NaN	NaN	NaN	NaN	NaN	NaN	NaN	21.282	NaN	D3YTZ7;Q9CR30	Josephin-2	Josd2
28.0081	28.215	28.2795	28.2728	27.5514	NaN	NaN	27.4822	1.59887	Q8K2T1;D3YU12;G5E8S7;Q8K2T1-2	NmrA-like family domain-containing protein 1	Nmral1
30.2556	30.0324	30.2133	30.173	29.9995	30.2149	30.4175	30.0282	1.00246	Q8VCM8;D3YU17	Nicalin	Ncln
NaN	NaN	NaN	26.1154	NaN	NaN	NaN	NaN	NaN	Q9WU40;E9QP59;D3YU56;Q9WU40-2	Inner nuclear membrane protein Man1	Lemd3
NaN	NaN	NaN	NaN	NaN	NaN	25.9619	NaN	NaN	Q9WVM3;D3YU58	Anaphase-promoting complex subunit 7	Anapc7
27.7184	27.9044	28.0544	27.7977	27.8424	26.8787	27.0515	27.3079	1.51425	Q91VS7;D3YU60;E9QJW0	Microsomal glutathione S-transferase 1	Mgst1
27.7497	27.2484	27.0268	27.2148	28.1304	27.1508	NaN	27.5181	0.817992	D3YUB7;K7N6H3;B8JJZ4		Gm3604;Zfp934;Zfp808
27.9552	27.9089	NaN	28.0047	28.4686	NaN	28.8557	NaN	0.613067	D3YUC9		Msrb3
NaN	NaN	NaN	NaN	NaN	NaN	NaN	NaN	NaN	Q8CB44;D6RET7;D3YUE7	GRAM domain-containing protein 4	Gramd4
NaN	NaN	NaN	NaN	NaN	NaN	NaN	23.0994	NaN	E9Q226;D3YUJ3		Ccnyl1
NaN	NaN	NaN	NaN	NaN	NaN	25.946	NaN	NaN	Q7TN99;Q7TN98;Q812E0;E9Q5X2;Q5SU47;F6T0J8;D3YUJ4;D3Z1R6;D3Z5R9;Q5SU48;E9Q969;Q7TN99-4;Q7TN99-3;Q7TN98-4;Q7TN98-5;Q7TN99-2;Q7TN98-3;Q7TN98-2;Q7TN99-5	Cytoplasmic polyadenylation element-binding protein 3;Cytoplasmic polyadenylation element-binding protein 4;Cytoplasmic polyadenylation element-binding protein 2	Cpeb3;Cpeb4;Cpeb2
30.8142	30.7714	30.8006	30.7907	30.8155	30.8854	30.6851	30.7048	1.01503	Q91YT0;D3YUM1;D3Z1U9	NADH dehydrogenase [ubiquinone] flavoprotein 1, mitochondrial	Ndufv1
NaN	NaN	NaN	NaN	NaN	NaN	24.5385	NaN	NaN	Q0P5W1;D3Z5P1;F8WI64;D3YUP0;Q0P5W1-3;Q8CIG5;F6ZLN8;Q0P5W1-2	Vacuolar protein sorting-associated protein 8 homolog	Vps8
29.7128	29.6758	29.7159	29.6736	29.6048	29.7307	29.7109	29.4976	1.0414	Q9WVG6;D3YUP1;Q9WVG6-2	Histone-arginine methyltransferase CARM1	Carm1
NaN	NaN	NaN	NaN	NaN	NaN	NaN	23.7627	NaN	E9PW37;D3YUS5;E9PYD8;F6SEU4;J3QQ18	Ras/Rap GTPase-activating protein SynGAP	Rasal2;Syngap1
NaN	23.0561	NaN	NaN	NaN	NaN	NaN	NaN	NaN	Q61124;D3YUU4;D3Z448;Q6PAH4	Battenin	Cln3
NaN	NaN	NaN	NaN	NaN	NaN	NaN	24.7422	NaN	Q8VBX6;D3YUX2;Q8VBX6-2;Q8VBX6-4;Q8VBX6-3	Multiple PDZ domain protein	Mpdz
27.175	27.1314	27.1875	26.9465	27.3796	NaN	27.6451	NaN	0.756677	P70182;D3YUY3;F8WI18;P70182-3;P70182-2	Phosphatidylinositol 4-phosphate 5-kinase type-1 alpha	Pip5k1a
27.9403	27.8673	27.9758	27.9133	27.6046	28.3782	27.9492	27.906	0.975812	P23249;D3YVL0;E9PW39	Putative helicase MOV-10	Mov10
26.3506	26.0512	26.4658	26.3063	26.202	25.851	25.4334	25.6709	1.41829	Q9QY73;D3YVM2	Transmembrane protein 59	Tmem59
NaN	NaN	NaN	NaN	NaN	NaN	NaN	24.9422	NaN	O55102;D3YVM8	Biogenesis of lysosome-related organelles complex 1 subunit 1	Bloc1s1
NaN	NaN	NaN	NaN	22.5896	NaN	NaN	NaN	NaN	Q8BGG7;D3YVT5	Ubiquitin-associated and SH3 domain-containing protein B	Ubash3b
24.5718	24.4664	24.6322	24.1177	24.2768	24.8088	24.7235	24.3493	0.937847	P62069;Q9D9M2;D3YVU0;D3YVJ5;Q9D9M2-2	Ubiquitin carboxyl-terminal hydrolase 46;Ubiquitin carboxyl-terminal hydrolase 12	Usp46;Usp12
NaN	NaN	NaN	NaN	NaN	NaN	NaN	26.8554	NaN	D3YVV7;G3UYX3		Nova2
NaN	NaN	NaN	NaN	NaN	NaN	NaN	23.242	NaN	Q91YE8;E9Q1U2;D3YVV9	Synaptopodin-2	Synpo2
30.1778	30.4275	30.3297	30.2646	30.6959	30.6625	30.8191	30.5212	0.771226	D3YVW2;Q8BXA1	Golgi integral membrane protein 4	Golim4
NaN	NaN	NaN	NaN	NaN	NaN	NaN	25.961	NaN	D3YVZ9;P58059	28S ribosomal protein S21, mitochondrial	Mrps21
NaN	NaN	NaN	NaN	NaN	NaN	NaN	24.3735	NaN	D6RFN5;D3YW25;O70131	Ninjurin-1	Ninj1
NaN	NaN	NaN	NaN	NaN	NaN	25.3524	NaN	NaN	D3YWL1;D3YW33;P35276;P63011	Ras-related protein Rab-3D;Ras-related protein Rab-3A	Rab3d;Rab3a
32.8134	32.7949	32.8103	32.7897	32.9202	33.0938	33.0288	33.0428	0.858967	D3YW48;O88456	Calpain small subunit 1	Capns1
26.5677	27.2661	NaN	NaN	NaN	NaN	NaN	NaN	NaN	Q9Z1M4;D6RH86;E9PUN3;D3YWB8;Q8BSK8;Q80X26;Q8BSK8-2	Ribosomal protein S6 kinase beta-2;Ribosomal protein S6 kinase beta-1	Rps6kb2;Rps6kb1
NaN	NaN	NaN	NaN	NaN	NaN	25.6251	25.3436	NaN	D3YWG7;Q8K0V2	DCN1-like protein;DCN1-like protein 3	Dcun1d3
NaN	NaN	NaN	NaN	NaN	NaN	NaN	26.9978	NaN	Q9DBU0;D6RGM8;D3YWH4;D3Z6X7;D3YYW1;D3Z279	Transmembrane 9 superfamily member 1	Tm9sf1
NaN	NaN	27.0467	26.9783	26.5098	26.8327	26.1814	26.9304	1.31853	Q8K2I1;D3YWJ4	Protein farnesyltransferase subunit beta	Fntb
28.1992	27.8387	28.3041	27.9938	27.8909	27.7719	27.7091	27.7404	1.23617	D3YWJ5;D3Z325;D3Z312;Q921Z5;D3Z205;J3QNA5;D3Z0Q1;J3QM73;Q921Z5-2	Tumor necrosis factor alpha-induced protein 8	Tnfaip8
27.6128	27.7405	27.5508	27.8546	27.4671	27.8627	27.8299	27.7708	0.970668	Q80W47;D3YWK1	WD repeat domain phosphoinositide-interacting protein 2	Wipi2
24.2959	24.1939	24.3878	24.2794	24.2353	24.3432	24.7154	24.3414	0.920459	Q8R2K1;D3YWS7;F6SJM7;Q8R2K1-5;Q8R2K1-4;Q8R2K1-2;F6X9P4;Q8R2K1-3	Fucose mutarotase	Fuom
NaN	NaN	NaN	NaN	NaN	NaN	22.7389	NaN	NaN	D3YWS8		Leng8
26.8776	27.1504	27.0015	27.2163	27.3322	27.0621	27.314	27.1854	0.893801	D3Z3N4;D3YWT1		Hnrnph3
NaN	NaN	27.6517	NaN	27.6287	27.6705	27.91	28.1414	0.87907	D3YWX2;F6YTL8;Q9R0I7;E9Q803	YLP motif-containing protein 1	Ylpm1
NaN	NaN	NaN	NaN	NaN	NaN	25.6685	NaN	NaN	Q8R0P4;D3YWY5;D3Z442;D3YZD8;D3YY39;D3Z1Q3;Q8R0P4-2	Mth938 domain-containing protein	Aamdc
28.8625	28.7981	28.8974	28.8163	28.9912	29.1719	29.6575	28.9153	0.789822	O70252;D3YX62	Heme oxygenase 2	Hmox2
29.2089	29.362	29.2794	29.3132	29.2068	29.443	29.8451	29.154	0.919327	D3YXK2;S4R1M2	Scaffold attachment factor B1	Safb
26.2815	25.9655	25.9698	26.1825	NaN	NaN	NaN	25.7829	1.24567	D3YXL1;Q9CQA9;D3Z2W9	Cancer-related nucleoside-triphosphatase homolog	Ntpcr
NaN	NaN	NaN	26.2705	NaN	NaN	NaN	NaN	NaN	P61025;D3YXP1;Q3UNC9	Cyclin-dependent kinases regulatory subunit 1;Cyclin-dependent kinases regulatory subunit	Cks1b;Cks1brt
26.3744	26.4672	26.5943	26.6742	26.5735	26.6651	26.5633	26.504	0.96664	Q9D1G2;D3YXP6;Q9D1G2-2	Phosphomevalonate kinase	Pmvk
NaN	NaN	NaN	NaN	NaN	NaN	NaN	25.5742	NaN	Q9D945;D3YXW1;Q9D945-2	Protein LLP homolog	Llph
26.4608	26.9217	26.9197	26.7462	26.8989	26.5591	NaN	26.5943	1.05555	Q91YS4;O88448;D3YXZ3	Kinesin light chain 2	Klc2
26.4586	26.4926	26.3679	26.2065	26.137	26.3739	26.3138	26.2765	1.07631	P52912;D3YY02;D3Z4H6	Nucleolysin TIA-1	Tia1
27.2775	27.3264	27.3594	27.4521	27.1057	27.1956	27.2244	26.9874	1.16924	Q9D6N5;D3YYC2;F6T9K1;G3UXH5;D3YY09	Dr1-associated corepressor	Drap1
NaN	NaN	NaN	NaN	NaN	NaN	NaN	23.3553	NaN	P42337;D3YY41	Phosphatidylinositol 4,5-bisphosphate 3-kinase catalytic subunit alpha isoform	Pik3ca
NaN	NaN	24.1745	NaN	24.2676	NaN	24.5189	NaN	0.85931	P97770;D3YYB2;P97770-3;P97770-2	THUMP domain-containing protein 3	Thumpd3
NaN	NaN	NaN	NaN	NaN	24.3592	NaN	NaN	NaN	Q8BSQ9;F8VQD1;D6RIL0;D6RI94;D3Z3R4;F6THL5;D3YYF2;E9Q7L3;D3Z1W6;E9Q7L2;D3Z1N4;E9Q4Y5;Q8BSQ9-2	Protein polybromo-1	Pbrm1
NaN	25.962	26.0851	25.894	26.1559	26.4318	25.7192	25.9541	0.942861	D3Z3Z8;D3YYI3;P60898	DNA-directed RNA polymerase subunit;DNA-directed RNA polymerase II subunit RPB9	Polr2i
30.8062	30.817	30.8364	30.6636	30.7758	30.8082	31.067	30.7261	0.956956	O09106;D3YYI8	Histone deacetylase 1;Histone deacetylase	Hdac1;Gm10093
26.5325	26.5242	26.6634	26.5336	26.4527	26.2486	26.8776	26.7028	0.99516	Q8R001;D3YYK8;E9Q6X0;Q8R001-2;Q3TG90	Microtubule-associated protein RP/EB family member 2	Mapre2
29.7454	29.7018	29.5784	29.6969	29.5479	29.2802	29.2847	29.3153	1.25145	Q3UU96;H7BX44;D3YYN8;E9PVY0;Q3UU96-2;F6Q5A5;F6S5Z6;F6YZJ7	Serine/threonine-protein kinase MRCK alpha	Cdc42bpa
27.6125	27.4062	27.616	27.4581	28.4886	28.2395	28.4427	28.3637	0.55079	O35678;E9Q3B9;D3YYS6;Q3UFN1	Monoglyceride lipase	Mgll
28.6696	28.8758	28.5903	28.9008	28.2158	28.3075	28.121	28.2753	1.44315	P15116;D3YYT0	Cadherin-2	Cdh2
26.7743	27.0086	26.8517	26.7919	26.1836	27.0783	26.7685	26.9552	1.0794	Q922P9;D3YYT1	Putative oxidoreductase GLYR1	Glyr1
29.3052	29.2883	29.1571	29.3858	29.1231	29.1844	29.468	29.4139	0.990858	D3YYU8;F7AD47	Obscurin-like protein 1	Obsl1
26.8335	26.8679	26.9506	27.0561	26.8303	27.0611	26.8364	27.0388	0.989914	D3YYW8;Q91V81-2;Q91V81	RNA-binding protein 42	Rbm42
NaN	NaN	NaN	NaN	NaN	NaN	NaN	26.5562	NaN	D3YYZ2		Gm5239
28.4131	28.538	28.4785	28.4369	28.3105	28.7376	28.2935	28.5156	1.00161	Q9CY66;D3YZ09;Q9CY66-3;Q9CY66-2	H/ACA ribonucleoprotein complex subunit 1	Gar1
NaN	NaN	NaN	NaN	NaN	NaN	24.1011	NaN	NaN	Q9CWR2;D3YZ17	Histone-lysine N-methyltransferase SMYD3	Smyd3
NaN	NaN	26.0793	NaN	26.2825	NaN	NaN	NaN	0.868622	D3YZ20;Q6PI63;O08740;D3YZ19	DNA-directed RNA polymerase II subunit RPB11	Polr2j
NaN	NaN	NaN	NaN	NaN	NaN	NaN	23.1778	NaN	P39688;D3YZ57;P39688-2	Tyrosine-protein kinase Fyn	Fyn
NaN	NaN	NaN	24.9391	NaN	NaN	NaN	25.6662	0.604117	D3YZ61;Q9ES30	Complement C1q tumor necrosis factor-related protein 3	C1qtnf3
30.0927	30.0149	30.1409	30.1724	30.1478	30.1645	30.259	30.2264	0.936792	Q99104;D3YZ62;D3Z4J3	Unconventional myosin-Va	Myo5a
30.1737	30.1418	30.1342	30.2792	30.1353	30.1585	30.1436	30.3183	0.995367	Q64213;Q64213-2;E9Q4Q2;D3YZC9;D3YZD0;Q64213-3;D3YVH4	Splicing factor 1	Sf1
NaN	NaN	NaN	NaN	NaN	NaN	NaN	25.7134	NaN	D3YZN8		Unc45a
29.2938	29.1704	29.0382	28.9168	29.5488	29.4078	29.6076	29.3083	0.777371	D3YZP9	Coiled-coil domain-containing protein 6	Ccdc6
NaN	NaN	NaN	NaN	NaN	NaN	NaN	25.345	NaN	P97473;D3Z282;D3YZS5;Q3UNH9	RISC-loading complex subunit TARBP2	Tarbp2
30.969	30.9635	30.9509	30.8826	31.0515	30.9996	31.1182	31.0181	0.929579	D3YZZ5;E9Q7G1		Tmed7
NaN	NaN	NaN	NaN	NaN	NaN	NaN	23.4395	NaN	D3Z016;P0C7N9	Proteasome assembly chaperone 4	Psmg4
25.2571	24.9637	25.0401	NaN	25.3963	25.3545	25.2352	25.2571	0.856302	Q6EDY6;F7AI27;D3Z030;Q6EDY6-3	Leucine-rich repeat-containing protein 16A	Lrrc16a
24.9964	25.4749	25.2482	NaN	25.214	NaN	NaN	NaN	1.01807	P41216;D3Z041	Long-chain-fatty-acid--CoA ligase 1	Acsl1
29.0635	29.0493	29.2681	29.198	29.1975	29.2144	29.184	29.1758	0.967142	Q6NS79;D3Z074;O08808;E9PXV7;E9PV41	Protein diaphanous homolog 1	Diap1;Diaph1
NaN	NaN	NaN	NaN	NaN	NaN	23.7137	NaN	NaN	Q8K400;D3Z2Q2;D3Z079	Syntaxin-binding protein 5	Stxbp5
NaN	NaN	NaN	NaN	NaN	NaN	25.9038	NaN	NaN	Q8BJZ3;D3Z0A5;D3Z225;Q3U717;Q8BJZ3-2	Protein lifeguard 3	Tmbim1
NaN	NaN	NaN	NaN	NaN	NaN	NaN	24.2563	NaN	D3Z0B7;D3Z0T3;Q9DCK3	Tetraspanin-4	Tspan4
28.4773	28.6268	28.6138	28.6158	28.3693	28.5947	28.917	28.5173	0.988868	Q9QZ73;D3Z0B8;D3Z2L7;Q3UT23;D3Z2N3;D3YUG2	DCN1-like protein 1;DCN1-like protein	Dcun1d1
29.8283	29.7308	29.7353	29.7026	29.702	29.7092	29.7916	29.7103	1.01464	O88545;D3Z0F5;F6QK86	COP9 signalosome complex subunit 6	Cops6
NaN	NaN	NaN	NaN	23.8329	NaN	NaN	NaN	NaN	Q99MD6;D3Z0H7;G3X8P6	Thioredoxin reductase 3	Txnrd3
NaN	NaN	NaN	NaN	26.2991	NaN	NaN	NaN	NaN	Q9JLT4;J3QMN4;D3Z0K8;J3QMQ8;Q9JLT4-2;Q9JLT4-4;Q9JLT4-3	Thioredoxin reductase 2, mitochondrial	Txnrd2
26.2824	NaN	NaN	NaN	26.3068	NaN	NaN	26.4787	0.926363	Q9Z210;D3Z0M4;E9PXK7;D6RFQ2	Peroxisomal membrane protein 11B	Pex11b
29.3198	29.2548	29.3448	29.2954	29.1195	29.1243	28.7645	29.2397	1.18239	D3Z0M9		Ddx23
28.4543	28.3076	28.1324	28.3259	28.4614	29.102	28.6956	29.0887	0.691655	Q9Z1E4;D3Z0Q6	Glycogen [starch] synthase, muscle	Gys1
28.6607	28.5626	28.703	28.7555	28.7772	28.6619	28.7879	28.7665	0.947419	Q9ES28;Q9ES28-3;D3Z0V2;Q9ES28-8;Q9ES28-4;Q9ES28-2;Q9ES28-7;Q9ES28-6;Q9ES28-5	Rho guanine nucleotide exchange factor 7	Arhgef7
NaN	NaN	NaN	NaN	NaN	NaN	NaN	24.3629	NaN	P12849;D3Z0V6	cAMP-dependent protein kinase type I-beta regulatory subunit	Prkar1b
26.9783	27.2381	27.2829	27.5342	27.1845	26.9715	27.2673	26.6923	1.17241	Q9D666;D3Z0V9;Q9D666-2;Q9D666-4;Q9D666-3	SUN domain-containing protein 1	Sun1
29.6228	29.5295	29.4287	29.3688	29.6468	29.6828	29.5655	29.5874	0.911823	Q6PDH0;E9PWB1;D3Z4N0;D3Z0X5;Q6PDH0-2;F6RUK9;E9Q307;F6RYD0	Pleckstrin homology-like domain family B member 1	Phldb1
30.3588	30.2408	30.1649	30.1551	30.164	30.0404	29.8791	30.339	1.08996	Q62393;D3Z637;D3Z125;E9PUA7;D3Z7X7;F8WHQ1;Q62393-2;Q62393-3;D3Z2U2	Tumor protein D52	Tpd52
26.0961	26.3661	26.4136	26.4679	26.3615	26.1893	26.1093	26.5361	1.02589	D3Z131;Q5U4D9;D3YUL7;D3Z132	THO complex subunit 6 homolog	Thoc6
NaN	26.8968	NaN	NaN	NaN	26.7087	26.3278	NaN	1.30003	Q80X71;D3Z191;D3Z6E0;D3Z0M2	Transmembrane protein 106B	Tmem106b
25.8667	25.825	25.8381	26.0353	25.9407	25.8209	26.1055	26.0285	0.944338	Q9CQE3;D3Z198	28S ribosomal protein S17, mitochondrial	Mrps17
NaN	NaN	25.5794	NaN	NaN	NaN	NaN	NaN	NaN	O35598;D3Z1E6;E9PYF2	Disintegrin and metalloproteinase domain-containing protein 10	Adam10
26.0158	25.8248	26.0973	25.7833	25.8599	26.0816	25.9191	25.7395	1.02121	Q9JLQ2;E9PVA6;D3Z1I2;Q80XR8;J3QK07;F7BIK4;F6WV69	ARF GTPase-activating protein GIT2	Git2
NaN	NaN	NaN	NaN	NaN	NaN	NaN	26.8367	NaN	Q9DBY1;E9QQ99;D3Z1Y1;D3YZH4	E3 ubiquitin-protein ligase synoviolin	Syvn1
NaN	NaN	NaN	NaN	NaN	NaN	NaN	25.0289	NaN	D3Z285		Nfu1
26.5385	26.5148	26.2896	26.4109	26.4774	26.8464	26.3429	26.132	0.99225	O54916;D3Z2E3;E9Q632;O54916-3;F6R6F1;O54916-4	RalBP1-associated Eps domain-containing protein 1	Reps1
27.925	27.8731	28.0222	27.8459	27.9061	27.9943	27.831	27.8295	1.01841	Q99PU8;D3Z2J3;Q99PU8-2;Q99PU8-3	Putative ATP-dependent RNA helicase DHX30	Dhx30
NaN	NaN	NaN	NaN	NaN	NaN	NaN	24.8401	NaN	Q64362;D3Z2J4;D3Z632	AKT-interacting protein	Aktip
25.7824	25.5813	25.9341	25.9557	25.7665	26.2362	25.9148	26.1017	0.87574	Q9D710;D3Z2J6;D3YYX0	Thioredoxin-related transmembrane protein 2	Tmx2
27.3457	27.0235	27.0959	27.1586	26.8734	27.3654	27.5895	27.1427	0.941593	D3Z2R5		Sepn1
NaN	NaN	NaN	24.1708	NaN	NaN	NaN	NaN	NaN	Q9WUU8;D3Z410;D3Z3B6;D3Z2W0;E9QM75;Q9WUU8-2;Q9WUU8-3	TNFAIP3-interacting protein 1	Tnip1
NaN	NaN	NaN	NaN	24.0817	NaN	NaN	NaN	NaN	D3Z2Y6;Q9D708		S100a16
29.8322	29.9104	29.9276	29.8793	29.6288	29.9335	29.7837	29.7404	1.08356	Q922J3;D3Z2Z1;F8WIA1;D3Z3M7;Q922J3-2;F6RCU2;Q8C0S5	CAP-Gly domain-containing linker protein 1	Clip1
28.4896	28.4777	28.3538	28.499	28.5313	28.7008	28.5871	28.5976	0.901766	Q9DCL8;D3Z3A0	Protein phosphatase inhibitor 2	Ppp1r2
NaN	NaN	NaN	NaN	25.6417	NaN	NaN	NaN	NaN	D3Z3C1;Q9WUD8	Fas apoptotic inhibitory molecule 1	Faim
26.3661	26.1627	26.6672	26.377	26.0598	26.5829	26.4366	26.2926	1.03546	Q80YV2;D3Z3D0;H3BKM2;Q80YV2-2	Nuclear-interacting partner of ALK	Zc3hc1
27.0451	27.0751	27.0128	26.8703	26.7563	26.9007	26.9994	27.0301	1.05643	Q9D824;D3Z619;D3Z3F1;D3Z4V2;Q9D824-4;Q9D824-3;Q9D824-2	Pre-mRNA 3-end-processing factor FIP1	Fip1l1
26.4494	27.359	27.1569	27.0175	26.4955	26.9728	27.267	27.0583	1.03333	P47802;G3UXX9;D3Z3F4;F7C846;G3XA75;G3XA66	Metaxin-1	Mtx1
28.9939	29.1318	29.1556	29.0995	29.1682	29.1602	29.0682	29.3631	0.936451	D3Z3J6		Paip1
29.5588	29.5596	29.7344	29.4775	30.1055	30.0214	30.3467	30.1838	0.668141	D3Z3Q3;Q921U8-2;Q921U8	Smoothelin	Smtn
25.7186	25.8004	NaN	NaN	NaN	NaN	NaN	NaN	NaN	Q99N95;F6W7C7;D3Z456	39S ribosomal protein L3, mitochondrial	Mrpl3
28.9994	28.718	28.8747	28.8834	28.9797	28.8736	29.1893	28.9774	0.90996	Q9CWZ7;D3Z4B2	Gamma-soluble NSF attachment protein	Napg
27.8551	NaN	NaN	27.8357	NaN	NaN	NaN	NaN	NaN	D3Z4D6;D3Z4C9;Q9CQY6	Ubiquinol-cytochrome-c reductase complex assembly factor 2	Uqcc2
NaN	NaN	NaN	NaN	NaN	NaN	NaN	24.8791	NaN	Q91V88;D3Z4D3;Q91V88-2;Q91V88-3;Q91V88-4;D3YTX1	Nephronectin	Npnt
NaN	NaN	NaN	24.1483	NaN	NaN	NaN	NaN	NaN	Q62176;G3UWQ8;G3UXN1;D3Z4I3	RNA-binding protein 38;RNA-binding protein 24	Rbm38;Rbm24
NaN	NaN	NaN	NaN	26.2407	NaN	NaN	NaN	NaN	Q05BC3;D6RII3;D3Z4J9;Q05BC3-2;Q05BC3-3	Echinoderm microtubule-associated protein-like 1	Eml1
NaN	NaN	NaN	NaN	NaN	26.1134	26.1132	NaN	NaN	P59481;D3Z4P2	VIP36-like protein	Lman2l
26.6756	26.5638	26.6625	26.7345	26.5876	26.6023	NaN	26.4386	1.08393	D3Z4S3	Putative peptidyl-tRNA hydrolase PTRHD1	Ptrhd1
26.1605	26.6192	26.3191	26.2208	NaN	26.3697	NaN	26.0012	1.10531	Q9R020;D3Z4U0;D3Z4T9	Zinc finger Ran-binding domain-containing protein 2	Zranb2
28.8993	28.3632	28.4813	28.6391	28.5014	28.3259	28.4171	28.1866	1.17934	Q922V4;D3Z4V1;F8WI31	Pleiotropic regulator 1	Plrg1
NaN	NaN	NaN	NaN	NaN	NaN	NaN	22.9561	NaN	O70258;F6WKE4;F6R6P2;D3Z572;F8WGM3;F6ULV5;E9PX46;O70258-2	Epsilon-sarcoglycan	Sgce
26.3298	NaN	26.275	NaN	NaN	26.4261	26.3597	NaN	0.939197	Q8VDV3;D3Z585;Q8VDV3-2	Guanine nucleotide exchange factor for Rab-3A	Rab3il1
NaN	NaN	NaN	NaN	NaN	NaN	22.5202	NaN	NaN	D6RFV4;D3Z5H3;Q9D8V7	Signal peptidase complex catalytic subunit SEC11C	Sec11c
25.1824	25.1471	25.1569	25.4832	25.1536	NaN	NaN	NaN	1.06349	D3Z5I1;Q3UPF5;G3X9X5;Q3UPF5-2	Zinc finger CCCH-type antiviral protein 1	Zc3hav1
26.1499	26.3491	26.366	26.1287	26.68	25.9257	25.9042	27.1641	0.888796	Q61103;D3Z5N6;F8WIP7	Zinc finger protein ubi-d4	Dpf2
NaN	NaN	NaN	NaN	NaN	NaN	NaN	22.3248	NaN	Q8C4V1;D3Z5T4;G3X9N1;Q8C4V1-3;Q8C4V1-2	Rho GTPase-activating protein 24	Arhgap24
30.8326	30.8163	30.901	30.6242	30.6637	30.5096	30.1385	30.2782	1.31588	Q9QZ88;D3Z645;Q9QZ88-2;D3YW98	Vacuolar protein sorting-associated protein 29	Vps29
NaN	26.6565	26.7138	26.4179	NaN	NaN	NaN	26.7553	0.895501	Q8CHC4;D3Z656;E9Q7S0;F7BQW7;F6VSS8;F7CD11	Synaptojanin-1	Synj1
34.7336	34.7593	34.7465	34.7125	34.917	34.75	34.7619	34.7904	0.95472	P97351;D3Z6C3;D3Z7W7	40S ribosomal protein S3a	Rps3a
26.1315	25.916	25.9759	26.4284	26.2339	26.3267	26.5049	25.9976	0.899487	Q6TYB5;D3Z6D5	Fasciculation and elongation protein zeta-2	Fez2
28.2034	28.6204	28.4618	28.3903	28.4405	29.0947	28.8866	28.9739	0.742288	Q6PER3;D3Z6G3;D3YUY6	Microtubule-associated protein RP/EB family member 3	Mapre3
28.6486	28.4429	28.5519	28.7022	28.4621	28.5023	28.2239	27.9454	1.23369	D3Z6H3;Q9WUB4;D3Z4E5	Dynactin subunit 6	Dctn6
28.0119	27.6761	27.9237	27.9685	27.9761	27.8199	27.514	27.55	1.13292	D3Z6I4;Q921W4;D3YU21;D3YZD6;Q921W4-2;F7BGV1	Quinone oxidoreductase-like protein 1	Cryzl1
25.8727	25.3894	25.5317	25.1121	25.7919	25.5008	25.6644	25.7542	0.869736	D3Z6J0;Q6SKR2		N6amt1
NaN	NaN	26.9247	26.1146	26.7115	NaN	25.6471	NaN	1.26606	P58462;H3BJR8;H3BJ24;H3BL33;H3BJM1;E2S038;H3BLF2;D3Z6Q4;D3Z6Q3;P58462-3;P58462-4;P58462-2;D3Z0J5	Forkhead box protein P1	Foxp1
26.0544	26.0378	26.2072	26.0457	26.4297	NaN	27.4305	25.8637	0.712836	D3Z6Q9;S4R1B8;S4R270;S4R2J8	Bridging integrator 2	Bin2
26.362	26.3561	26.3972	26.3442	26.4115	26.3713	NaN	26.3442	0.992548	Q9JJR8;D3Z6W5	Transmembrane protein 9B	Tmem9b
NaN	24.2861	24.5071	24.5265	NaN	24.6806	NaN	24.721	0.834567	Q3UHH8;D3Z6W7;Q3UHH8-2	Glucoside xylosyltransferase 1	Gxylt1
NaN	NaN	NaN	NaN	NaN	NaN	NaN	22.8896	NaN	Q9D6K7;D3Z767	Tetratricopeptide repeat protein 33	Ttc33
28.24	28.0058	27.9838	28.1274	28.2359	28.5585	28.5824	28.5812	0.757727	Q61749;Q61749-2;D3Z780	Translation initiation factor eIF-2B subunit delta	Eif2b4
31.0534	30.9302	31.0588	30.9478	30.9525	31.3923	31.9215	31.0868	0.789644	P61957;H7BWX9;D3Z794;G3UZX6	Small ubiquitin-related modifier 2	Sumo2;Sumo3
25.8429	25.6269	25.8225	25.7048	25.6331	25.7161	24.7315	26.1868	1.13477	Q9Z2Q5;D3Z7C0	39S ribosomal protein L40, mitochondrial	Mrpl40
25.5931	25.5548	25.6691	25.728	25.6152	25.6766	25.4756	25.532	1.04348	Q9Z120;D3Z7D2	tRNA (guanine-N(7)-)-methyltransferase	Mettl1
27.0983	27.4014	27.162	26.8361	27.5984	NaN	NaN	NaN	0.719991	Q8BWT5;F8WI56;D3Z7D3	Disco-interacting protein 2 homolog A	Dip2a
27.5717	27.4187	27.5528	27.5669	27.6736	27.5987	27.9348	27.555	0.893166	Q2NL51;D3Z7E5	Glycogen synthase kinase-3 alpha	Gsk3a
27.3548	27.1341	27.3558	27.3169	27.5787	27.4358	27.2063	27.5184	0.904756	Q8K3W0;D3Z7P0;Q8K3W0-1;E9Q8Q1;E9Q0U3;Q8K3W0-4;Q8K3W0-6;Q8K3W0-5	BRCA1-A complex subunit BRE	Bre
31.4491	31.5113	31.3754	31.4315	31.2681	31.5661	31.3697	31.415	1.02605	D3Z7P3;D3Z7P4	Glutaminase kidney isoform, mitochondrial	Gls
27.5352	27.6615	27.782	27.663	27.4435	27.6211	27.8301	27.6477	1.01736	D3Z7P3-2	Glutaminase kidney isoform, mitochondrial	Gls
NaN	NaN	NaN	NaN	NaN	26.7791	NaN	NaN	NaN	Q3TBD2;G3X9Q3;D3Z7R7;Q3TBD2-3;Q3TBD2-2;Q3TBD2-4	Minor histocompatibility protein HA-1	Hmha1
28.3568	28.4083	28.3006	28.2627	28.5449	28.2744	28.3153	28.5807	0.935153	Q3URD3;F8WIH0;D3Z7V3;H7BX64;Q3URD3-2;F6UV57;F6YCM8;Q3URD3-4;Q3URD3-3;Q3URD3-5;D3YV81	Sarcolemmal membrane-associated protein	Slmap
31.5368	31.6571	31.7059	31.5021	31.6821	31.4605	31.5393	31.3066	1.07427	D5MCW4;Q9CQ89	Protein CutA	Cuta
NaN	NaN	NaN	NaN	NaN	NaN	NaN	23.949	NaN	O08736;D6RCG7	Caspase-12	Casp12
NaN	NaN	NaN	27.4958	27.6959	NaN	NaN	NaN	0.87049	Q91W34;D6RDS0;Q91W34-2	UPF0420 protein C16orf58 homolog	BC017158
NaN	NaN	NaN	24.9631	NaN	NaN	NaN	NaN	NaN	P52431;D6RFB8	DNA polymerase delta catalytic subunit;DNA polymerase	Pold1
NaN	NaN	NaN	NaN	NaN	NaN	NaN	25.0385	NaN	Q9QYI4;D6RHR9;Q8C4C9	DnaJ homolog subfamily B member 12	Dnajb12
NaN	NaN	NaN	24.9064	NaN	27.7823	27.7268	NaN	0.138874	D6RI20;Q9CR20;J3QMQ2	Immediate early response 3-interacting protein 1	Hdhd2;Ier3ip1;Gm10784
27.4684	27.7933	27.4578	27.817	27.8049	28.3501	28.576	28.2365	0.656219	Q9R0P4;D6RI64	Small acidic protein	Smap;1110004F10Rik
NaN	NaN	NaN	NaN	NaN	NaN	NaN	24.7363	NaN	O35984;P41778-2;P41778;G3UXL9;H3BJM6;D9J2V6;Q3UR63;V9GXB8	Pre-B-cell leukemia transcription factor 2;Pre-B-cell leukemia transcription factor 1	Pbx2;Pbx1
27.8838	27.8047	27.8463	27.7985	27.576	27.6023	27.7833	27.7899	1.10608	E0CX20		Bud31
NaN	NaN	NaN	NaN	NaN	25.962	NaN	NaN	NaN	E0CZ04;E0CX39;Q923B0-2;Q923B0	Gamma-glutamylaminecyclotransferase	Ggact
NaN	27.0889	NaN	27.1395	NaN	27.0287	27.324	27.0801	0.979375	Q9D2C7;E0CX98;E0CZE8;E0CXR0	Bax inhibitor 1	Tmbim6
28.8455	28.7588	28.7929	28.9917	28.2971	28.2329	29.0573	28.7022	1.20987	Q6PEB6;E0CXA9;E0CYJ0;G8JL35	MOB-like protein phocein	Mob4
27.0665	27.9144	27.5476	27.3974	27.3093	27.4942	NaN	NaN	1.05682	Q61301;Q61301-3;E0CXB9;Q61301-2	Catenin alpha-2	Ctnna2
27.0719	26.9763	27.1159	27.1203	26.9788	26.2741	NaN	27.0001	1.24842	Q8CIF6;E0CXC7;Q8CIF6-2	SID1 transmembrane family member 2	Sidt2
NaN	NaN	NaN	NaN	NaN	21.4893	NaN	NaN	NaN	E0CXC8;F6YTG0;Q3TLP5-2;Q3TLP5	Enoyl-CoA hydratase domain-containing protein 2, mitochondrial	Echdc2
25.1517	24.7776	25.1752	24.8351	NaN	NaN	NaN	NaN	NaN	Q5SUQ9;E0CXE7;Q5SUQ9-3;Q5SUQ9-2	CST complex subunit CTC1	Ctc1
28.5259	28.5051	28.546	28.5511	28.2729	28.5821	28.6409	28.2299	1.0722	Q9DB43;E0CZD9;E0CXM9;E0CX79;E0CXR3	Zinc finger protein-like 1	Zfpl1
NaN	NaN	NaN	NaN	NaN	NaN	NaN	23.0258	NaN	Q91ZZ2;E0CXV1;Q3UGX8;Q3UHC1		Rapgef1
NaN	NaN	NaN	NaN	25.6861	NaN	NaN	NaN	NaN	P62482;Q3UPV6;E0CXZ9	Voltage-gated potassium channel subunit beta-2	Kcnab2
27.7421	27.491	27.6611	27.7222	27.5502	27.1209	27.1952	NaN	1.28818	Q9CR64;E0CY07;Q9CR64-2	Protein kish-A;Protein kish	Tmem167a;Tmem167
NaN	NaN	NaN	NaN	NaN	NaN	NaN	25.8066	NaN	E0CY96;G3X8S8		Tsen15
26.8452	27.0318	26.7686	26.8969	27.1566	27.6775	27.6599	NaN	0.654119	Q6PCP5;F7CTF8;E0CYB9;Q6PCP5-3;Q6PCP5-4;E0CYI3	Mitochondrial fission factor	Mff
26.666	26.2165	26.2673	26.27	25.8817	NaN	NaN	NaN	1.38823	P50096;E0CYE2;F7DEU6;E0CXK0	Inosine-5-monophosphate dehydrogenase 1;Inosine-5-monophosphate dehydrogenase	Impdh1
27.3854	26.9888	27.1297	27.1329	27.4126	27.4058	27.7	27.1765	0.832473	Q8C6G8;E0CYH4	WD repeat-containing protein 26	Wdr26
30.7517	30.8869	30.9344	30.9487	30.7576	30.6142	30.8948	30.6541	1.10976	E0CYM1;E0CYH7;Q6P6L0;Q6P6L0-3	Filamin A-interacting protein 1-like	Filip1l
28.4284	28.0795	28.2961	28.1837	28.354	28.0067	28.0112	28.0414	1.10466	Q6P6I8;E0CYM8;P97797;P97797-2;E9QPT7	Tyrosine-protein phosphatase non-receptor type substrate 1	Sirpa
NaN	NaN	NaN	NaN	NaN	NaN	NaN	25.6476	NaN	E0CYQ0;E0CZ97;F6SYN4;E0CYD2		Kctd17
29.71	29.9303	29.8106	29.9464	30.2013	29.9073	30.0563	29.9254	0.886843	P23506;F7D432;E9PWE0;E0CYV0;P23506-2	Protein-L-isoaspartate(D-aspartate) O-methyltransferase;Protein-L-isoaspartate O-methyltransferase	Pcmt1
27.9312	27.5254	27.5305	27.874	27.4346	28.5136	28.1642	28.2992	0.764387	Q9EPV8;E0CYW1;E0CZB3;E0CY91;E0CY38;E9QJZ1;G3UWR6	Ubiquitin-like protein 5	Ubl5;Gm16381
NaN	NaN	NaN	NaN	NaN	NaN	23.0685	NaN	NaN	E0CYX9;Q3TC33	Coiled-coil domain-containing protein 127	Ccdc127
27.9088	27.9562	28.0503	27.8396	27.8869	28.1672	28.2235	28.0019	0.913103	G3XA21;E0CZ22		Mroh1
31.2038	31.2237	31.2785	31.1484	30.9408	31.1513	30.8812	31.1267	1.13966	P84244;P02301;E0CZ27;F8WI35	Histone H3.3;Histone H3.3C;Histone H3	H3f3a;H3f3c
26.5273	26.6899	26.8236	26.5	26.8379	26.2799	26.7169	26.6182	1.01535	P48453;G3X8U7;E0CZ78;P48453-2;E9Q6P2	Serine/threonine-protein phosphatase 2B catalytic subunit beta isoform;Serine/threonine-protein phosphatase	Ppp3cb
26.7778	26.6525	26.9833	26.8911	26.4764	26.711	26.6357	26.5246	1.18038	E0CZ81;Q8CIV8	Tubulin-specific chaperone E	Tbce
30.1615	30.1173	30.0831	30.1581	29.9068	30.141	29.9943	29.9375	1.09817	Q8VBW6;E0CZE0	NEDD8-activating enzyme E1 regulatory subunit	Nae1
28.774	28.4812	28.817	28.6846	28.0205	28.4855	28.603	28.1082	1.30577	E2JF22;E9PUQ9;F7AC58	Piezo-type mechanosensitive ion channel component 1	Piezo1
NaN	NaN	NaN	NaN	26.4472	NaN	NaN	NaN	NaN	Q6P4S6;F6U8X4;F6S7W6;E9PU87;Q6P4S6-2;F6U6U5	Serine/threonine-protein kinase SIK3	Sik3
28.4203	28.6462	28.6908	28.6204	28.3664	28.3782	28.5184	28.1469	1.18259	Q571H0;E9PU96	Nucleolar pre-ribosomal-associated protein 1	Urb1
25.5556	25.5008	25.6205	25.2518	25.4867	NaN	NaN	25.9813	0.839833	Q5BLK4;E9PUA2	Terminal uridylyltransferase 7	Zcchc6
27.8601	27.7453	27.661	27.7498	27.6229	27.8206	27.8758	27.7969	0.982821	Q2YDW2;E9PUB7;D3YX87;Q2YDW2-2	Protein misato homolog 1	Msto1
NaN	NaN	NaN	NaN	26.1451	25.7755	26.0794	NaN	NaN	Q9CZW4;E9PUC2	Long-chain-fatty-acid--CoA ligase 3	Acsl3
NaN	NaN	NaN	NaN	NaN	NaN	NaN	26.3554	NaN	Q6NSW3;Q6NSW3-2;Q6NSW3-4;E9PUC4;Q6NSW3-3	A-kinase anchor protein SPHKAP	Sphkap
31.8081	31.7035	31.6921	31.7622	31.8328	31.8103	31.7274	31.7443	0.974528	E9PUD2;Q8K1M6-3;Q8K1M6;Q8K1M6-2;Q8K1M6-4	Dynamin-1-like protein	Dnm1l
26.7	26.4521	26.8862	26.8742	26.8978	26.6695	NaN	26.6828	0.984929	Q5SSL4;E9PUE7;Q5SSL4-4;Q5SSL4-2;Q5SSL4-3	Active breakpoint cluster region-related protein	Abr
27.2883	27.4693	27.4363	27.6324	27.3045	27.5159	26.9987	27.563	1.08001	Q6NZN0;E9PUF4;E9Q640;Q6NZN0-5;Q6NZN0-3;Q6NZN0-4;Q6NZN0-2;E9PYZ7	RNA-binding protein 26	Rbm26
29.6913	29.8277	29.6619	29.6193	29.8889	29.4324	30.017	29.6388	0.969811	Q61210;E9PUF7;Q61210-5;Q61210-3;Q61210-4;Q61210-2;F6ZN61	Rho guanine nucleotide exchange factor 1	Arhgef1
NaN	NaN	26.2405	26.1809	NaN	26.4169	26.3847	26.1269	0.933809	Q61211;E9PUG7;Q61211-2;Q8C8I3	Eukaryotic translation initiation factor 2D	Eif2d
26.9367	26.8943	26.7478	26.8769	26.3827	26.6269	26.446	26.6239	1.26931	Q8K012;E9PUK3;E9PUI5;Q8K012-2	Formin-binding protein 1-like	Fnbp1l
31.0687	31.0637	31.1269	31.0316	30.7586	30.9473	31.1148	30.8142	1.12039	E9PUM4;Q71LX4	Talin-2	Tln2
27.382	NaN	NaN	NaN	27.1913	27.3063	NaN	27.2614	1.09354	Q9Z138;E9PUN5	Tyrosine-protein kinase transmembrane receptor ROR2;Tyrosine-protein kinase transmembrane receptor	Ror2
NaN	NaN	NaN	NaN	NaN	NaN	NaN	21.3071	NaN	Q9CQ33;E9PUQ1	Leucine-zipper-like transcriptional regulator 1	Lztr1
28.991	28.9358	29.0541	29.0052	29.1011	29.1355	29.0411	29.152	0.92601	Q921M4;E9PUQ5;Z4YJU8;Q921M4-2	Golgin subfamily A member 2	Golga2
26.7117	26.1131	26.2532	26.2755	26.415	NaN	NaN	NaN	0.948273	Q3UYU2;E9PUQ7;Q8BNV1;F6ZHN3	tRNA (uracil-5-)-methyltransferase homolog A	Trmt2a
NaN	NaN	NaN	NaN	NaN	NaN	NaN	23.923	NaN	E9PUR0;E9Q1M6		Ankhd1
26.5629	26.5551	26.8669	26.456	26.7397	26.879	27.3246	27.2835	0.733834	P06537;E9PUR6;E9PYV1;P06537-2;P06537-3;P06537-4;E9Q310;E9Q8A6	Glucocorticoid receptor	Nr3c1
NaN	NaN	NaN	NaN	NaN	NaN	NaN	24.3156	NaN	Q571J5;E9PUT0;F6UQD0;Q7M6W8;E9PVW1;Q8C827;Q7TMC9;Q8K3B4;Q6DFU8;Q80ZX2;Q07231;O88253;Q9CZ29;D3YV88;B8JJY3;F2Z422;F8VPP0;Q6PEP4;Q9Z117;G3UVW7;Q3U4L8;B1B1D3;E9Q0Q3;J3JS23;Q8C827-2;Q8C827-3	Zinc finger protein 354C;Zinc finger protein 62;Zinc finger and SCAN domain-containing protein 21	Znf354c;3110052M02Rik;Zfp273;Zkscan7;Zfp62;Zfp85;Zfp946;Zfp948;Zfp790;Zscan21;Gm10226;Zfp773;Zfp708;Zfp677;Zfp53;Zfp40;Zfp51;2610021A01Rik
NaN	26.6682	26.3211	26.2678	NaN	26.5399	26.3832	26.3341	0.999977	E9PV03		Nbeal1
29.8102	29.8267	29.9324	29.8291	29.7048	29.7569	29.8437	29.7934	1.05329	Q9D5V5;E9PV12;G3X914;E9Q6Z0	Cullin-5	Cul5
25.655	25.6769	25.871	NaN	NaN	25.7162	NaN	25.2197	1.20276	Q68FL4;F8WGT1;E9PV16;H3BKT5;F8WI65;Q68FL4-2	Putative adenosylhomocysteinase 3;Adenosylhomocysteinase	Ahcyl2
31.7527	31.5246	31.7669	32.1511	31.7005	31.5667	31.7804	32.1094	1.00666	O35143;E9PV44	ATPase inhibitor, mitochondrial	Atpif1
NaN	NaN	23.4525	23.8408	23.7071	24.0257	24.0512	23.5804	0.873906	E9PV60;E9Q2M9		Wdfy4
NaN	NaN	NaN	NaN	NaN	NaN	NaN	24.4605	NaN	E9PV91;Q3TNX8;Q8BNJ2	A disintegrin and metalloproteinase with thrombospondin motifs 4	Adamts4
32.4149	32.4307	32.4009	32.411	32.376	32.4876	32.4644	32.3508	0.996316	E9PVA8		Gcn1l1
NaN	NaN	NaN	NaN	NaN	NaN	NaN	NaN	NaN	E9PVB5;E9PVB5-2;A2AGG1;A2AFY7	Tetratricopeptide repeat protein 17	Ttc17
33.0495	33.1918	33.1251	33.1193	33.2192	33.3205	33.3412	33.265	0.891898	E9PVC5		Eif4g1
NaN	NaN	NaN	NaN	NaN	NaN	NaN	27.9442	NaN	Q6NZJ6;E9PVC6;E9Q9E1;Q6NZJ6-2	Eukaryotic translation initiation factor 4 gamma 1	Eif4g1
26.5746	26.8697	26.9981	27.051	26.7895	26.4902	26.528	26.7497	1.17609	Q9D6K5;E9Q2H0;E9PVN6;Q9D6K5-2;Q9D6K5-4;Q9D6K5-3	Synaptojanin-2-binding protein	Synj2bp;Gm20498
NaN	NaN	NaN	NaN	25.1232	NaN	NaN	NaN	NaN	Q64331;E9PVU0;E9Q3L1;E9Q175;E9Q174;V9GXM4;V9GX76	Unconventional myosin-VI	Myo6
25.3357	25.3513	25.4115	25.5746	24.921	NaN	NaN	NaN	1.41154	E9PVX6		Mki67
30.3773	30.5505	30.3876	30.607	30.7738	30.5618	30.6046	30.4256	0.926042	E9QAH1;E9PVZ8		Golgb1
28.2882	28.9713	28.4406	28.2038	28.7388	28.5644	28.2698	28.7007	0.937929	Q9CY57;E9PW20;Q9CY57-5;Q9CY57-4;Q9CY57-3;Q9CY57-2;D3YZA1;D3Z7T7	Chromatin target of PRMT1 protein	Chtop
32.3468	32.3574	32.3023	32.3251	32.2925	32.5046	32.5898	32.4973	0.908684	P28656;J3QP68;E9PW66	Nucleosome assembly protein 1-like 1	Nap1l1
28.6687	28.5028	28.6656	28.4406	28.4456	28.8847	29.1623	28.8451	0.832199	Q8BK63;Q8BK63-2;H7BXB1;E9Q4G7;E9PWB2;E9Q2U6;E9Q3W1	Casein kinase I isoform alpha	Csnk1a1
27.3948	27.0824	27.075	27.0603	27.466	27.253	27.9041	27.3496	0.790014	Q61183;E9PWC8;E9PZR3;E9QAN2;Q61183-4;Q61183-3;Q61183-2	Poly(A) polymerase alpha	Papola
NaN	NaN	NaN	NaN	NaN	NaN	NaN	25.3364	NaN	H3BKS8;E9PWD4;Q3TX08;D6RFC0;D6RG86;H3BKV3;G3V019;H3BK68;D3Z413;H3BL70;H3BKB8	tRNA (guanine(26)-N(2))-dimethyltransferase	Trmt1
34.3423	34.204	34.2212	34.2748	34.354	34.4656	34.4322	34.4151	0.897417	E9PWE8;Q62188;Q3TT92	Dihydropyrimidinase-related protein 3	Dpysl3
27.5033	27.193	27.2362	27.3404	26.8257	27.0095	27.2381	27.1072	1.2084	P48025;E9PWE9	Tyrosine-protein kinase SYK;Tyrosine-protein kinase	Syk
27.1629	27.409	27.2024	27.1873	27.1916	27.1243	27.4361	27.2294	0.996575	E9PWG2;E9PY51		Trappc8
30.7253	30.6027	30.7483	30.6538	30.4951	31.1472	NaN	31.1034	0.851036	P05977;P09542;E9PWG4;P05977-2	Myosin light chain 1/3, skeletal muscle isoform;Myosin light chain 3	Myl1;Myl3
27.6536	27.6742	27.852	27.8081	27.4443	27.9606	27.7257	27.6863	1.03008	E9PWG6		Ncapg
31.422	31.3081	31.3651	31.3627	31.8477	31.6537	31.8343	31.7565	0.753367	E9PWQ3;J3QQ16;D3YWD1		Col6a3
NaN	25.0907	25.3439	25.2558	25.1512	24.8451	NaN	24.6219	1.28112	E9PZA7;E9QLK7;E9PWT1;F7CGG2		Trrap
NaN	NaN	21.6114	NaN	NaN	NaN	NaN	NaN	NaN	O35231;E9PWU7;O35231-2	Kinesin-like protein KIFC3	Kifc3
NaN	NaN	NaN	NaN	NaN	NaN	NaN	25.0381	NaN	P18653;E9PWV3;Q505N6;F6RQA2;F6Q8A4;G3UZI3	Ribosomal protein S6 kinase alpha-1;Ribosomal protein S6 kinase	Rps6ka1
NaN	NaN	NaN	25.9259	NaN	25.8888	25.9334	NaN	1.01031	E9Q4Y2;E9PWW9		Rsf1
31.2523	31.2281	31.2102	31.2145	31.2277	31.4276	31.3457	31.398	0.917974	Q8C0C7;E9PWY9	Phenylalanine--tRNA ligase alpha subunit	Farsa
29.8457	29.8669	29.8282	29.7821	29.9939	29.9959	30.2115	30.0107	0.857213	E9PZW8;E9QKV6;E9PWZ6;Q9QY06;Q9QY06-3;Q9QY06-2	Unconventional myosin-IXb	Myo9b
30.4147	30.3854	30.3201	30.2402	30.3304	30.1454	30.1408	30.3546	1.06977	Q8BPM2;E9PX30;Q8BPM2-2;E9Q1T3	Mitogen-activated protein kinase kinase kinase kinase 5;Mitogen-activated protein kinase kinase kinase kinase	Map4k5
28.7215	28.6989	28.77	28.6562	28.9314	28.797	28.8208	28.698	0.932936	Q8K2V1;E9PX53;E9QPR5;Q8K2V1-2	Serine/threonine-protein phosphatase 4 regulatory subunit 1	Ppp4r1
NaN	NaN	NaN	26.7554	NaN	27.134	27.3656	26.8687	0.775196	Q8C2B3;E9PX62;E9PXW8;Q8C2B3-5;Q8C2B3-2;Q8C2B3-3;E9PXW1;Q8C2B3-6;Q8C2B3-4;E9PZG4	Histone deacetylase 7	Hdac7
25.8316	26.0939	26.0433	26.2289	NaN	NaN	NaN	25.2776	1.70743	E9Q585;E9Q1Q0;E9PX68		Slc4a1ap
34.717	34.7445	34.7554	34.7601	34.281	34.2073	34.3406	34.2423	1.39132	Q60847;E9PX70;Q60847-2;Q60847-5;J3KMS9;Q60847-4;Q60847-3	Collagen alpha-1(XII) chain	Col12a1
28.1919	27.9893	NaN	NaN	27.9472	28.2884	28.4681	28.1465	0.918945	Q8K1A6;E9PX94	Coiled-coil and C2 domain-containing protein 1A	Cc2d1a
NaN	NaN	NaN	NaN	NaN	NaN	23.4944	NaN	NaN	Q8K1N1;E9PXB0;E9QAC9	Calcium-independent phospholipase A2-gamma	Pnpla8
29.0779	29.4556	29.3522	29.2244	29.8172	29.6367	29.4444	29.5178	0.797469	Q8CFI0;Q8CFI0-3;E9PXB7	E3 ubiquitin-protein ligase NEDD4-like	Nedd4l
29.9299	30.002	30.1732	29.96	29.751	30.0956	29.699	30.0788	1.07936	E9Q9X1;E9PXE5;E9QL23;S4R1P5;Q91ZU6;Q91ZU6-3;Q91ZU6-4;Q91ZU6-2	Dystonin	Dst
27.1822	27.1243	27.0459	27.1313	26.8073	27.0207	NaN	NaN	1.15423	Q8CCB4;E9PXG9;Q8CCB4-2;E9PYD3	Vacuolar protein sorting-associated protein 53 homolog	Vps53
NaN	NaN	NaN	NaN	NaN	NaN	NaN	25.0994	NaN	E9PXM9		Fbxw24
30.0116	30.0322	29.9975	29.9255	30.1257	29.9735	30.0642	30.0314	0.961261	Q9ESD7;E9QL12;E9PXU9;Q9ESD7-2;E9Q423;Q9ESD7-3	Dysferlin	Dysf
32.9463	32.9873	32.9449	33.0403	32.9155	33.0522	33.1296	33.0171	0.966673	Q91W90;E9PXX7	Thioredoxin domain-containing protein 5	Txndc5
26.8851	27.2837	27.2867	27.2244	27.1368	27.2084	26.4951	27.1265	1.13153	Q9WU42;E9Q9V3;E9PY55;E9Q701;F8VQL9;Q9WU42-2;F6Z4B2	Nuclear receptor corepressor 2	Ncor2
NaN	NaN	NaN	NaN	NaN	NaN	NaN	25.2772	NaN	Q99L28;E9PY85;G3UZF1	Probable ribosome biogenesis protein RLP24	Rsl24d1;Gm20509
NaN	NaN	NaN	26.3549	26.4847	NaN	NaN	NaN	0.913958	Q8R311;H3BK44;E9PY90;H3BK48;E9Q3S2;H3BKH2;H3BJS0;H3BJS5;H3BJ71;H3BKL6;H3BL19;H3BJI6	cTAGE family member 5	Ctage5
29.8829	29.9731	29.8803	30.0495	30.4015	30.1613	30.4485	30.2763	0.770865	E9PYB0		Ahnak2
NaN	NaN	NaN	NaN	NaN	26.1892	26.3597	26.0557	NaN	F6TFN2;E9PYI7;F6VG99;E9PYF4		Lmo7
NaN	NaN	NaN	NaN	NaN	NaN	23.3126	NaN	NaN	Q9ERD8;E9PYG5;A6PW97	Gamma-parvin	Parvg
29.2517	29.1308	29.1943	29.2825	29.1634	29.4785	29.3985	29.3584	0.910749	E9PYG6		Rasa1
29.6495	29.4926	29.3231	29.6204	29.9376	29.8882	29.8758	29.7695	0.786558	G3XA35;E9PYH0;Q62059;Q62059-2;E9QMK3;E9QMK2;Q62059-4;Q62059-3	Versican core protein	Vcan
NaN	NaN	NaN	NaN	23.5502	NaN	NaN	NaN	NaN	Q6ZPQ6;E9PYJ7;Q6ZPQ6-2	Membrane-associated phosphatidylinositol transfer protein 2	Pitpnm2
NaN	NaN	NaN	NaN	NaN	NaN	NaN	23.8452	NaN	Q8VCW4;E9Q8P6;E9PYK0;Q8VCW4-2	Protein unc-93 homolog B1	Unc93b1
33.553	33.6016	33.662	33.6269	33.6092	33.7454	33.672	33.699	0.952291	Q9CXW4;E9PYL9;D3Z3K1;D3YW69	60S ribosomal protein L11	Rpl11;Gm10036
26.3104	26.4644	NaN	26.425	26.369	26.4369	26.4893	26.4926	0.967936	P97393;E9PYT0	Rho GTPase-activating protein 5	Arhgap5
NaN	NaN	NaN	NaN	NaN	NaN	NaN	29.0943	NaN	Q9CUN6;E9Q4K9;E9PYU8	E3 ubiquitin-protein ligase SMURF1;E3 ubiquitin-protein ligase	Smurf1
NaN	NaN	25.8724	NaN	NaN	NaN	NaN	NaN	NaN	Q05512;Q05512-3;E9Q9N6;E9PYX3;Q3T9A3;F6ZS70;E9QMP6;Q05512-4;Q05512-2	Serine/threonine-protein kinase MARK2	Mark2
26.7136	26.6217	26.4633	26.7486	26.2038	26.6338	26.5039	26.4854	1.13294	Q9QZQ1;Q9QZQ1-2;E9PYX7;E9Q852;E9Q9C3	Afadin	Mllt4
33.5727	33.4577	33.5489	33.5071	33.6389	33.647	33.7611	33.6762	0.895522	E9PZ00;Q8BFQ1;K3W4L3;J3QPG5;Q61207	Sulfated glycoprotein 1	Psap
36.2693	36.2204	36.2991	36.2312	36.0576	36.1215	36.1427	36.0378	1.12124	E9PZ16;B1B0C7;Q05793	Basement membrane-specific heparan sulfate proteoglycan core protein;Endorepellin;LG3 peptide	Hspg2
27.7727	28.0165	27.7935	27.7619	27.8593	27.7503	27.5901	27.6505	1.08945	Q91W59;E9PZ21;Q91W59-2;Q91W59-3;Q8BWL5;G3UZJ9;Q8BWL5-4;Q8BWL5-6;Q8BWL5-3;Q8BWL5-2;Q8BWL5-5	RNA-binding motif, single-stranded-interacting protein 1;RNA-binding motif, single-stranded-interacting protein 3	Rbms1;Rbms3
27.1619	27.0142	27.238	27.17	27.1144	27.224	27.3887	27.1367	0.952688	Q3UFP5;E9PZ73;Q3USK5;P30051;E9Q387;E9PVS2;Q6PAQ8;E9QAK6	Transcriptional enhancer factor TEF-1	Tead1
26.7584	26.8887	26.6752	26.8102	26.7567	26.9606	27.0297	26.8053	0.929837	Q91W89;E9PZ88;F8WIE1;E9PYM7	Alpha-mannosidase 2C1	Man2c1
NaN	NaN	NaN	NaN	NaN	NaN	NaN	24.9685	NaN	P19182;E9PZB9;E9Q949	Interferon-related developmental regulator 1	Ifrd1
35.3014	35.3075	35.3211	35.3699	35.3084	35.2342	35.2474	35.325	1.03256	E9PZF0;Q01768	Nucleoside diphosphate kinase;Nucleoside diphosphate kinase B	Gm20390;Nme2
27.3244	27.4672	27.4281	27.5323	27.5287	27.5469	28.0601	27.6092	0.841932	E9PZJ8	Activating signal cointegrator 1 complex subunit 3	Ascc3
NaN	NaN	NaN	NaN	NaN	NaN	NaN	NaN	NaN	E9PZM7		Scaf11
NaN	NaN	NaN	NaN	NaN	NaN	NaN	23.0625	NaN	E9PZP8		Herc1
NaN	NaN	NaN	NaN	NaN	NaN	NaN	29.3449	NaN	E9Q557;E9PZW0	Desmoplakin	Dsp
NaN	NaN	NaN	NaN	NaN	NaN	NaN	24.9507	NaN	Q8C5L3;E9Q8D5;E9Q027;Q8C5L3-3;Q8C5L3-2	CCR4-NOT transcription complex subunit 2	Cnot2
30.6291	30.737	30.7611	30.6085	30.4524	30.6081	30.5431	30.4762	1.12037	E9Q035;P47758	Signal recognition particle receptor subunit beta	Gm20425;Srprb
NaN	NaN	NaN	NaN	NaN	NaN	NaN	24.4502	NaN	Q4KMM3;Q4KMM3-4;E9Q0A7;Q4KMM3-3;Q4KMM3-2	Oxidation resistance protein 1	Oxr1
27.6608	27.8049	27.6545	27.3674	27.504	27.6153	27.999	27.7034	0.943749	Q9Z0R4;E9Q3I8;E9Q3I9;E9Q3I4;E9Q3I5;E9Q0N0;Q9Z0R4-2;Q6NZJ5	Intersectin-1	Itsn1
30.4511	30.6631	30.617	30.5621	30.8305	30.7451	30.8687	30.7369	0.857391	E9Q0S6		Tns1
NaN	NaN	NaN	NaN	NaN	25.987	25.7247	25.7976	NaN	E9Q0T0;G5E8W7;O35448;F6SPQ1	Lysosomal thioesterase PPT2	Ppt2
26.4778	26.5616	26.6461	26.4075	26.5613	26.5273	26.2036	26.7353	1.01141	P46062;E9Q0Y4	Signal-induced proliferation-associated protein 1	Sipa1
27.416	27.5639	27.6723	27.819	28.0821	27.7808	28.3088	28.1106	0.730636	E9Q137;Q3TXY2		Tex264
26.1969	NaN	NaN	26.4637	26.2838	26.5072	26.5043	26.387	0.939344	Q8C5Q4;E9Q179	G-rich sequence factor 1	Grsf1
NaN	NaN	NaN	23.5662	NaN	NaN	NaN	NaN	NaN	E9Q186;Q9CTH6	rRNA-processing protein FCF1 homolog	Fcf1
30.8094	30.8237	30.8907	30.8121	31.9914	32.0591	32.1177	32.0514	0.429008	E9Q1D6;Q0VD84;E9QNQ3;O08999	Latent-transforming growth factor beta-binding protein 2	Ltbp2
33.4004	33.4364	33.4389	33.3441	33.3318	33.3723	33.4205	33.3054	1.03344	E9Q1G8;E9Q9F5		2015-09-07
27.3208	27.2374	27.2621	27.1201	26.9508	27.3324	27.1307	27.1219	1.07263	Q9QYC0;Q9QYC0-2;E9Q1K3;F8WHZ9;F8WGR0	Alpha-adducin	Add1
28.0263	28.1591	28.0684	28.4417	28.415	27.7551	28.7914	28.2023	0.922055	E9Q1P8	Interferon regulatory factor 2-binding protein 2	Irf2bp2
32.769	32.7512	32.6804	32.7191	32.5813	32.7557	32.7418	32.7581	1.01445	Q01405;E9Q1S3	Protein transport protein Sec23A	Sec23a
31.3529	31.2912	31.3569	31.3395	31.4035	31.3691	31.4507	31.3109	0.966991	Q6PHZ2;E9Q1T1;Q6PHZ2-5;E9Q1V9;Q6PHZ2-2;Q6PHZ2-4;E9PXV3;E9Q1W0;Q8CCM0	Calcium/calmodulin-dependent protein kinase type II subunit delta	Camk2d
NaN	26.2749	26.0767	NaN	NaN	25.9394	26.0474	26.051	1.11977	Q6PEE2;E9Q1U6;Q6PEE2-2	CBP80/20-dependent translation initiation factor	Ctif
26.8863	26.8334	NaN	26.8191	26.5922	26.8616	26.6381	26.7268	1.10312	Q6ZPR5;E9Q1V5;E9Q914;Q6ZPR5-3;Q6ZPR5-2;Q6ZPR5-4;E9Q9L1;Q6ZPR5-5;E9Q0L7	Sphingomyelin phosphodiesterase 4	Smpd4
27.2273	26.2638	26.4232	26.9695	26.5812	NaN	26.2079	NaN	1.25388	E9Q414;E9Q1Y3	Apolipoprotein B-100;Apolipoprotein B-48	Apob
27.0491	27.1226	27.25	27.5531	26.0805	25.9684	27.1439	25.8476	1.97739	E9Q467;E9Q236		Abcc4
26.099	26.0074	26.0209	25.9449	25.5921	25.9748	25.9092	25.8637	1.13532	Q9EPL9;Q8C178;E9Q296	Peroxisomal acyl-coenzyme A oxidase 3;Acyl-coenzyme A oxidase	Acox3
26.4446	26.9084	26.9182	26.6269	26.5852	27.0692	27.0228	26.6621	0.926395	Q9QVP9;E9Q2A6;Q3UDE9	Protein-tyrosine kinase 2-beta	Ptk2b
NaN	NaN	NaN	NaN	NaN	NaN	NaN	23.7358	NaN	Q8BMQ2;E9Q2B0;Q8BMQ2-2	General transcription factor 3C polypeptide 4	Gtf3c4
NaN	NaN	NaN	NaN	NaN	NaN	26.4095	NaN	NaN	Q9CR29;E9Q2S9;Q9CR29-2	Coiled-coil domain-containing protein 43	Ccdc43
29.3692	29.4326	29.5051	29.5128	29.0015	29.4003	29.4579	29.2047	1.13984	Q8CG47;E9Q2X6	Structural maintenance of chromosomes protein 4;Structural maintenance of chromosomes protein	Smc4
NaN	27.125	27.3108	NaN	NaN	26.6828	26.5664	26.84	1.43545	O88522;Q8VC91;E9Q2Y3;Q7TSS3;A3KG44;A3KG40;A3KG41;A3KG38	NF-kappa-B essential modulator	Ikbkg
28.9854	29.1308	29.1963	29.1983	28.7739	29.0638	29.0625	28.997	1.11219	E9Q317;O55128;D3YY55	Histone deacetylase complex subunit SAP18	Gm10094;Sap18
NaN	27.0538	NaN	NaN	27.8772	NaN	NaN	NaN	0.565109	Q8K2A7;E9Q361;E9Q360	Integrator complex subunit 10	Ints10
NaN	NaN	NaN	NaN	NaN	NaN	NaN	25.6796	NaN	Q99LJ7;F6X7I4;F6ZTZ2;E9Q3B1;E9Q213;E9PY30;E9Q5U1;E9PZR2;E9QA84;E9QAL7;E9QA48;E9Q7J4;Q99LJ7-2	RCC1 and BTB domain-containing protein 2	Rcbtb2
NaN	NaN	NaN	NaN	NaN	NaN	NaN	25.2455	NaN	P62876;E9Q3B5	DNA-directed RNA polymerases I, II, and III subunit RPABC5	Polr2l;Gm10774
30.3108	30.4039	30.3279	30.3042	29.8999	29.6118	29.7336	29.7061	1.51451	E9Q3E2;Q8CC35;Q8CC35-2;Q8CC35-3	Synaptopodin	Synpo
28.2415	28.0598	28.1691	28.0135	28.0785	27.9669	28.2583	27.7833	1.0712	E9Q3G8		Nup153
27.0568	27.122	26.9308	27.0185	26.8491	27.2216	27.2415	26.758	1.01008	E9Q3L2		Pi4ka
28.5306	28.4824	28.483	28.4525	28.3477	28.6759	28.7044	28.7933	0.905508	Q62432;E9Q3M0;Q62432-2;E9Q5P9;E9PXA8	Mothers against decapentaplegic homolog 2	Smad2
NaN	NaN	NaN	NaN	24.0047	NaN	NaN	NaN	NaN	Q9Z129;F6S4D9;E9Q3N0;Q9Z129-2	ATP-dependent DNA helicase Q1	Recql
29.7801	29.8243	29.8896	29.9184	29.2068	29.5487	29.6704	29.25	1.35109	Q61490;E9Q3Q6;E9Q4G8;F6QH25	CD166 antigen	Alcam
27.977	28.1985	27.9541	27.9175	28.0006	28.0181	28.188	28.0378	0.966372	P62257;E9Q3U1;D3Z2I4;J3KMU3	Ubiquitin-conjugating enzyme E2 H	Ube2h
32.5867	32.5608	32.5334	32.5228	32.6973	32.7215	32.729	32.607	0.90892	E9Q3X0		Mvp
28.6083	28.5553	28.6675	28.3607	28.7631	28.6286	28.6318	28.5882	0.929821	Q8K4L3;E9Q983;E9Q3Z5;Q8K4L2	Supervillin	Svil
26.8083	27.143	27.0374	26.8651	26.8066	27.1143	27.1029	27.2454	0.930546	E9Q411		Nbas
26.2511	26.3618	26.4723	26.3404	26.8779	26.5025	26.403	26.5367	0.856411	E9Q421;Q8BXX3;Q8BL63;Q9CXY9	GPI-anchor transamidase	Pigk
NaN	25.315	NaN	25.2896	NaN	NaN	NaN	NaN	NaN	Q9QZR0;E9Q446;D3YXC4;F6Z123	E3 ubiquitin-protein ligase RNF25	Rnf25
31.7171	31.7136	31.9103	31.7179	31.1096	31.0773	31.0757	31.3949	1.51608	E9Q450		Tpm1
27.3427	27.3176	27.3968	27.218	27.2768	27.1423	27.3402	26.9493	1.10315	Q6P2K6;E9Q481	Serine/threonine-protein phosphatase 4 regulatory subunit 3A	Smek1
27.3998	27.1978	NaN	26.6604	NaN	26.2904	26.9411	27.2474	1.19723	E9Q4K7		Kif13b
NaN	26.7222	26.5902	NaN	NaN	NaN	26.6566	NaN	0.999723	Q91VN4;E9Q4M4	MICOS complex subunit Mic25	Chchd6
NaN	NaN	NaN	NaN	NaN	27.3343	27.9243	26.9942	NaN	E9Q4P1;D3YWG9;D3Z057;Q9DAD3		Wdfy1
NaN	NaN	NaN	NaN	NaN	NaN	NaN	26.1277	NaN	Q61043;E9Q4S3;Q61043-2	Ninein	Nin
27.3496	27.5427	27.6345	27.5399	27.6389	27.9181	27.7835	27.8681	0.820471	O70566;Q6W4W7;E9Q4U7	Protein diaphanous homolog 2	Diaph2;Diap2
28.424	28.5978	28.386	28.5951	28.293	28.228	28.5163	28.178	1.14623	E9Q4X2		Uggt2
28.6277	28.4271	28.6902	28.5231	28.6985	28.5376	28.2591	28.7411	1.00553	E9Q512;H3BJG4		Trip11
28.1139	27.9739	28.3782	28.2536	28.1724	28.4798	28.1592	27.9304	0.99616	F7A6H4;E9Q555	E3 ubiquitin-protein ligase RNF213	Rnf213
31.9656	31.9955	31.9674	31.9731	32.1207	32.1124	31.9996	32.0049	0.943438	E9Q586;E9Q3M3;O08788;O08788-2;D3YX34	Dynactin subunit 1	Dctn1
NaN	NaN	NaN	NaN	NaN	NaN	NaN	23.6127	NaN	Q5DW34;E9Q5A3;Z4YJZ7;Q5DW34-2;Q5DW34-3	Histone-lysine N-methyltransferase EHMT1	Ehmt1
29.2949	29.552	29.4898	29.3441	29.3772	29.5252	29.5361	29.5176	0.953414	E9Q5C9		Nolc1
27.2223	NaN	NaN	27.6974	NaN	28.1019	27.9498	NaN	0.675487	P69566;E9Q5D6;P69566-2	Ran-binding protein 9	Ranbp9
NaN	NaN	NaN	NaN	NaN	NaN	NaN	26.752	NaN	F8VQB6;E9Q5G1;F8VQB6-2;D3YXW4;F6UVU0	Unconventional myosin-X	Myo10
NaN	NaN	NaN	NaN	NaN	NaN	NaN	24.2629	NaN	E9Q5G3	Kinesin-like protein KIF23	Kif23
34.0542	34.1456	34.2043	34.124	33.9942	34.2682	34.2267	34.2097	0.970853	Q8K0Z5;E9Q5J9		Tpm3
27.0096	27.0431	26.8789	26.7872	26.6877	NaN	NaN	NaN	1.18263	E9Q5K9;E9Q5K9-3;E9Q5K9-2;D6RG95	YTH domain-containing protein 1	Ythdc1
27.0917	26.737	27.1027	27.1866	27.2465	27.7819	27.8395	27.5343	0.673127	Q5SSH7;E9Q5W5;Q5SSH7-2	Zinc finger ZZ-type and EF-hand domain-containing protein 1	Zzef1
NaN	NaN	NaN	NaN	NaN	26.3798	26.4895	26.0456	NaN	Q924C6;E9Q600	Lysyl oxidase homolog 4	Loxl4
26.2034	26.0444	26.2903	26.6913	25.9293	26.1166	26.2423	25.9822	1.18079	Q60680;E9Q605;E9QNL4;Q60680-2;Q60680-3	Inhibitor of nuclear factor kappa-B kinase subunit alpha	Chuk
37.3134	37.2601	37.2639	37.3183	37.3885	37.3768	37.4809	37.3711	0.923126	E9Q616		Ahnak
30.0492	30.119	30.0384	30.1523	30.3877	30.3655	30.4713	30.2635	0.822293	E9Q634	Unconventional myosin-Ie	Myo1e
NaN	NaN	NaN	NaN	NaN	NaN	NaN	22.6382	NaN	Q8BN58;F6XG99;E9Q642;Q8BN58-2;Q8BN58-3	Rho GTPase-activating protein 28	Arhgap28
NaN	NaN	NaN	NaN	NaN	NaN	24.3078	NaN	NaN	E9Q649	Beta-1,3-galactosyl-O-glycosyl-glycoprotein beta-1,6-N-acetylglucosaminyltransferase 4	Gcnt4
NaN	NaN	NaN	NaN	25.5823	NaN	25.6422	NaN	NaN	E9Q6C7;Q8JZZ7;Q8JZZ7-2	Latrophilin-2	Lphn2
28.4659	28.4693	28.408	28.3489	28.4379	28.1943	28.2316	28.2733	1.10095	Q3UIX4;E9Q6E5;D3Z4B0		Srsf11
28.2926	28.2474	28.2663	NaN	NaN	NaN	NaN	26.5387	3.31743	Q61730;Q61730-2;G3UY13;E9Q6I2;Q3UVZ1	Interleukin-1 receptor accessory protein	Il1rap
25.9571	26.345	26.2395	26.25	26.2049	25.7349	NaN	25.7698	1.22663	E9Q6J5		Bod1l
29.9948	30.1143	30.0194	30.0017	29.8345	30.0444	30.0321	29.8572	1.06474	Q80TV8;J3QP81;E9Q6L0;E9QNY9;E9QKH0;Q80TV8-2	CLIP-associating protein 1	Clasp1
26.359	26.2966	25.9874	26.2636	26.6838	26.8073	27.0142	26.9565	0.642247	Q60949;E9Q6L4;F6QUA9;Q60949-2	TBC1 domain family member 1	Tbc1d1
NaN	26.2912	26.5353	NaN	26.3368	NaN	NaN	NaN	1.05442	Q80U78;E9Q6M7;Q3TTW5;Q80U78-2;Q80U78-3	Pumilio homolog 1	Pum1
28.1604	28.299	28.076	28.1413	28.4016	28.3283	27.9935	NaN	0.951346	E9Q6P4;G5E8P0		Tubgcp6
31.8215	31.854	31.7402	31.8008	31.9655	31.9844	32.0427	31.9875	0.876059	E9Q6R7		Utrn
28.5861	28.4423	28.5324	28.6456	28.5708	28.7919	28.7506	29.0314	0.849935	Q3UWL8;E9Q6U4;Q6P0X1	Prefoldin subunit 4	Pfdn4
NaN	NaN	NaN	NaN	NaN	NaN	25.2498	NaN	NaN	Q9CVD2;F6T5L3;E9Q717;Q5M8S1	Ataxin-3	Atxn3
32.6289	32.5527	32.6173	32.6199	32.2999	32.2309	32.3923	32.3635	1.21676	E9Q718;Q9R0B9	Procollagen-lysine,2-oxoglutarate 5-dioxygenase 2	Plod2
NaN	NaN	NaN	NaN	NaN	NaN	NaN	22.5875	NaN	E9Q777;E9Q774		Akap11
NaN	24.9858	24.9312	24.9362	NaN	NaN	NaN	NaN	NaN	Q924K8;Q3U3A7;E9Q794;Q3UII8;Q924K8-2	Metastasis-associated protein MTA3	Mta3
30.8775	30.8391	30.833	30.908	30.8728	30.8714	31.044	30.9226	0.957072	Q5UE59;E9Q7C9;Q7TNF4;Q8CD76;O88447	Kinesin light chain 1	Klc1
NaN	24.2466	NaN	NaN	NaN	NaN	NaN	NaN	NaN	E9Q7D5;S4R1F1		Arhgef5
30.7959	30.7089	30.7555	30.8642	30.5372	30.5957	30.7288	30.3966	1.16195	E9Q7G0		Numa1
28.4643	28.3134	28.2123	28.1783	28.1772	28.5245	27.9967	28.1302	1.06063	Q3UQ84;E9Q7H6;Q922A3;Q3TP97	Threonine--tRNA ligase, mitochondrial	Tars2
NaN	NaN	NaN	NaN	NaN	NaN	NaN	25.8422	NaN	E9Q7L0		Ogdhl
NaN	NaN	NaN	NaN	NaN	NaN	NaN	23.6009	NaN	E9Q7L1;G3UX45		Urb2
29.0853	29.3716	29.3237	29.3659	29.396	29.1054	29.3831	29.2613	1.00012	E9Q7M2		Tsc22d2
30.3566	30.3669	30.3726	30.3252	30.5229	30.0083	30.3458	30.2716	1.04839	O35609;E9Q855;Q3UXS0	Secretory carrier-associated membrane protein 3	Scamp3
25.4067	NaN	NaN	NaN	NaN	NaN	NaN	NaN	NaN	Q8BKC8;Q8BKC8-2;E9Q8A3;Q8BKC8-3;D6RI80	Phosphatidylinositol 4-kinase beta	Pi4kb
26.7589	26.7054	26.5048	26.8316	26.8847	26.8006	NaN	26.508	0.978793	E9Q8I7		Nfxl1
25.9274	26.1588	25.9327	25.943	25.9087	26.611	26.5043	26.5462	0.756769	P97360;E9Q8J8;E9QAJ7	Transcription factor ETV6	Etv6
27.3264	26.8817	27.2041	27.4852	26.8806	26.4387	26.2148	26.765	1.56871	Q6ZPZ3;E9Q8K8;Q6ZPZ3-2	Zinc finger CCCH domain-containing protein 4	Zc3h4
26.3264	26.4078	27.054	NaN	26.204	26.5016	26.4139	26.1984	1.20296	Q8BRT1;E9Q8N5;Q08EB6;F7DCH5	CLIP-associating protein 2	Clasp2
NaN	NaN	NaN	NaN	NaN	NaN	NaN	25.7727	NaN	Q8CI51-3;F8WJI6;E9Q8P5	PDZ and LIM domain protein 5	Pdlim5
31.2984	31.3249	31.2606	31.3142	31.3003	31.4467	31.6266	31.4205	0.901875	E9Q912;E9Q6Q4		Rap1gds1
27.9694	27.6819	27.7622	26.9654	28.2143	27.9565	27.9367	28.0404	0.735986	Q8BK08;E9Q933;Z4YN74	Transmembrane protein 11, mitochondrial	Tmem11
NaN	NaN	NaN	NaN	NaN	NaN	NaN	25.0758	NaN	O88622;E9Q954;G3X8U8;O88622-2	Poly(ADP-ribose) glycohydrolase	Parg
27.1636	27.097	27.1604	27.24	27.2919	27.5962	27.7176	27.5445	0.77255	O35071;E9Q9B0	Kinesin-like protein KIF1C	Kif1c
NaN	NaN	NaN	NaN	NaN	NaN	NaN	23.0385	NaN	E9Q9B7		Kidins220
29.5347	29.7782	29.7491	29.8163	29.6111	29.4544	29.428	29.6605	1.13373	E9Q9C5;P63082;D3Z3B2	V-type proton ATPase 16 kDa proteolipid subunit	Atp6v0c
28.9145	28.8193	28.7752	28.6501	28.9205	28.9395	28.6346	28.8639	0.966037	P33173;Q6TA13;E9QAN4;G3UW47;E9Q9G6	Kinesin-like protein KIF1A	Kif1a
29.6316	29.7049	29.917	29.8853	29.6721	29.6975	29.883	29.5513	1.05975	Q811D0;Q811D0-2;Q811D0-3;H7BWY4;E9Q9H0;D3Z3B8;S4R2T8	Disks large homolog 1	Dlg1
27.538	27.1606	27.4615	27.3399	27.3591	27.7325	27.3739	27.4101	0.936986	P54103;E9Q9H2;E9Q9H3;Q3TRX6	DnaJ homolog subfamily C member 2;DnaJ homolog subfamily C member 2, N-terminally processed	Dnajc2
NaN	28.7275	28.5785	NaN	NaN	NaN	NaN	28.5458	1.07714	Q6ZQA0;E9Q9L6;Q6ZQA0-2;F6VTL9	Neurobeachin-like protein 2	Nbeal2
28.771	28.7048	28.698	28.7224	28.74	28.6447	28.6476	28.584	1.0497	Q3V1L4;G3X9J6;E9Q9M1	Cytosolic purine 5-nucleotidase	Nt5c2
27.7734	27.7709	27.7907	27.6709	27.5673	27.8113	27.999	27.935	0.948241	Q3UJD6;E9Q9M5;J3KMM1;Q3UJD6-2	Ubiquitin carboxyl-terminal hydrolase 19;Ubiquitin carboxyl-terminal hydrolase	Usp19
36.1705	36.2097	36.2302	36.2385	36.1704	36.2024	36.271	36.2012	1.00068	E9QA15;D3Z6I7		Cald1
31.9008	31.9788	31.9529	31.7451	32.1532	32.1244	32.491	32.1343	0.794806	E9QA16;E9Q0M9;Q8VCQ8;S4R1T7		Cald1
NaN	NaN	NaN	NaN	NaN	NaN	NaN	21.5976	NaN	Q9CYC3;F6VN87;E9QA83;F6V6S1	Transmembrane protein 39A	Tmem39a
NaN	NaN	NaN	NaN	NaN	26.0218	26.0119	26.068	NaN	E9QAB6		Ptar1
27.8812	28.1394	27.8047	27.9451	27.8681	28.0164	27.8268	27.8848	1.03066	E9QAE3		Btaf1
26.6088	NaN	NaN	NaN	NaN	26.8148	26.5141	26.2467	1.05966	Q0VGY8;E9QAF9	Protein TANC1	Tanc1
29.495	29.5273	29.5755	29.4723	29.4516	29.2589	29.55	29.3929	1.07488	Q9WV60;E9QAQ5	Glycogen synthase kinase-3 beta	Gsk3b
31.0212	31.1738	31.158	31.1412	31.0572	30.9984	30.9079	30.9742	1.10124	Q6PDQ2;E9QAS5;E9QAS4	Chromodomain-helicase-DNA-binding protein 4	Chd4
29.7723	29.6675	29.7705	29.9141	29.6158	29.7159	29.6076	29.6667	1.09399	P35922;E9QAT0;Q6AXB7;P35922-3;P35922-2;E9QAS8;P35922-5;P35922-4;P35922-6	Fragile X mental retardation protein 1 homolog	Fmr1
33.7358	33.7929	33.8354	33.9198	33.687	34.0205	33.6083	33.9754	0.998736	Q9CZM2;E9QAZ2	60S ribosomal protein L15;Ribosomal protein L15	Rpl15;Gm10020
28.1756	27.7411	27.915	27.996	27.7041	28.0332	29.9955	28.257	0.687521	P13595-2;E9QB01;E9Q589;P13595-3;P13595-4	Neural cell adhesion molecule 1	Ncam1
31.8796	31.9612	31.9224	31.9199	31.8745	31.8797	31.7471	31.8614	1.05709	Q68FL6;E9QB02	Methionine--tRNA ligase, cytoplasmic	Mars
NaN	NaN	NaN	NaN	NaN	NaN	NaN	23.6191	NaN	E9QJS0;G5E8U8;G5E8U5;Q80ZK0	28S ribosomal protein S10, mitochondrial	Mrps10
27.5162	27.3554	27.4032	27.4622	27.7489	27.975	27.9036	27.5848	0.774413	Q9DC42;E9QMJ5;E9QJS7;Q9Z0M6;Q9Z0M6-2;Q9Z0M6-3	CD97 antigen	Cd97
NaN	NaN	NaN	21.1486	NaN	NaN	NaN	NaN	NaN	Q8CG79;E9QJU8;Q62415	Apoptosis-stimulating of p53 protein 2;Apoptosis-stimulating of p53 protein 1	Tp53bp2;Trp53bp2;Ppp1r13b
NaN	NaN	25.3366	NaN	NaN	NaN	NaN	25.9578	0.65013	Q8K2Z2;E9QJV4	Pre-mRNA-processing factor 39	Prpf39
24.3667	NaN	24.0837	NaN	NaN	24.3371	24.5449	NaN	0.861069	Q9WVL2;Q9QXJ2;E9QJX9	Signal transducer and activator of transcription 2;Signal transducer and activator of transcription	Stat2
28.2082	28.1805	27.9123	27.849	28.7431	28.2779	28.1442	28.3183	0.793678	E9QK48;Q7TNG5;Q7TNG5-2;D3YWS2;D6RGM3	Echinoderm microtubule-associated protein-like 2	Eml2
26.8103	27.2293	27.1794	26.9677	26.7332	27.0032	26.7778	26.9972	1.12414	Q5XG71;E9QK83	Small subunit processome component 20 homolog	Utp20
24.6356	24.6238	24.6905	24.2492	24.4354	24.614	24.6048	24.181	1.06509	Q5PSV9;E9QK89	Mediator of DNA damage checkpoint protein 1	Mdc1
29.2007	29.3091	29.2961	29.3933	29.5336	29.5547	29.443	29.5955	0.851513	Q8BMG7;E9QKE4	Rab3 GTPase-activating protein non-catalytic subunit	Rab3gap2
28.0536	27.6792	27.7688	28.0403	27.6649	27.8759	27.6246	28.3322	1.00771	Q99NH0;E9QKG6;Q99NH0-2;E9Q804;Q99NH0-3	Ankyrin repeat domain-containing protein 17	Ankrd17
30.6964	30.7248	30.789	30.7637	30.762	30.6105	30.5776	30.7311	1.05203	Q03173-3;Q03173-4;E9QKR1;Q03173-6;Q03173;J3QNM3;E9QKQ9;E9QLZ9;Q03173-5	Protein enabled homolog	Enah
29.8748	29.7672	30.025	30.0276	29.932	30.0021	30.1964	30.1117	0.909471	E9QKT1;O08759	Ubiquitin-protein ligase E3A	Ube3a
31.1506	31.1858	31.1938	31.2333	31.3396	31.4849	31.596	31.4679	0.822892	Q91YE6;E9QKZ2;E0CXB2	Importin-9	Ipo9
30.8048	30.9801	30.881	30.8117	30.9935	30.9575	31.1809	30.7346	0.934829	P98078;E9QL31;P98078-2;E9PX84;Q3TRE6;P98078-3;F6TQN9;Q9DCE6;E0CXT5	Disabled homolog 2	Dab2
26.5902	26.4592	25.9012	26.7918	26.7681	26.7087	26.5476	26.5055	0.872438	E9QL65;Q8CI04	Conserved oligomeric Golgi complex subunit 3	Cog3
NaN	NaN	NaN	NaN	NaN	24.6452	24.766	NaN	NaN	Q91YX5;E9QL80;D3YVK0	Acyl-CoA:lysophosphatidylglycerol acyltransferase 1	Lpgat1
31.051	30.9705	31.0475	31.0645	30.9242	31.2713	31.2465	31.1576	0.922407	E9QLA5;Q0GNC1;Q0GNC1-3	Inverted formin-2	Inf2
25.6936	NaN	25.6634	25.7263	NaN	NaN	NaN	NaN	NaN	Q3UFF7;E9QLB2	Lysophospholipase-like protein 1	Lyplal1
NaN	NaN	NaN	NaN	NaN	NaN	25.8159	25.9671	NaN	E9QLB8;Q566J8	AarF domain-containing protein kinase 4	Adck4
NaN	NaN	NaN	NaN	NaN	NaN	NaN	25.1393	NaN	Q8BZ98;E9QLL2;Q8BZ98-2	Dynamin-3	Dnm3
25.7573	25.5692	25.9839	25.508	25.8138	25.9093	25.5849	25.8788	0.938156	Q6PF93;E9QLS6;Q6PF93-2;D3YZ98;E9Q824	Phosphatidylinositol 3-kinase catalytic subunit type 3;Phosphatidylinositol 3-kinase	Pik3c3
NaN	NaN	NaN	NaN	NaN	26.433	26.1133	26.0416	NaN	E9QLW5;P09535;D3Z4N4;J3QJZ9	Insulin-like growth factor II;Insulin-like growth factor II;Preptin	Igf2
26.8733	26.7046	26.8075	26.9331	NaN	NaN	NaN	NaN	NaN	Q91WX5;E9QM21;O08734	Bcl-2 homologous antagonist/killer	Bak1
27.398	27.2481	27.0092	27.2438	NaN	NaN	NaN	NaN	NaN	P55012;E9QM38	Solute carrier family 12 member 2	Slc12a2
28.6419	28.5285	28.8745	28.7216	28.6217	28.5922	29.2232	29.103	0.874542	O70305;O70305-2;E9QM77;O70305-3;F6U2C2	Ataxin-2	Atxn2
NaN	NaN	NaN	NaN	NaN	NaN	NaN	24.8863	NaN	Q8CES0;E9QMB7	N-alpha-acetyltransferase 30	Naa30
NaN	NaN	NaN	NaN	NaN	NaN	24.0202	NaN	NaN	E9QME5;Q99PP7-2;Q99PP7;E9QP19	E3 ubiquitin-protein ligase TRIM33	Trim33
26.0536	26.1119	26.0998	26.2847	26.0345	26.5345	26.166	26.1603	0.941919	E9QMF4;E0CXW7		Osgep
NaN	NaN	NaN	NaN	NaN	NaN	NaN	24.6158	NaN	Q99J72;Q99J72-3;H3BKS1;H3BJJ6;H3BJD1;Q3TI69;H3BJQ3;H3BKE5;E9QMH1;H3BJ44;H3BJL0;Q99J72-4;Q99J72-2	DNA dC->dU-editing enzyme APOBEC-3	Apobec3
31.2898	31.3458	31.356	31.246	31.4931	31.372	31.5393	31.3238	0.918499	E9QMH7;Q9DBZ1	Inhibitor of nuclear factor kappa-B kinase-interacting protein	Ikbip
28.2648	28.1421	28.1914	27.9829	28.1954	28.2309	28.1046	28.2434	0.967092	Q9QWY8;H3BKD4;H3BKE6;E9QMI7;E9QMJ1;H3BL41;H3BJY2;E9QN63;Q9QWY8-2;Q9QWY8-4;Q9QWY8-3	Arf-GAP with SH3 domain, ANK repeat and PH domain-containing protein 1	Asap1
29.7585	29.6911	29.6961	29.6599	29.1686	29.1507	29.2823	29.2494	1.40313	Q8BH86;E9QMK9;Q8BH86-2	UPF0317 protein C14orf159 homolog, mitochondrial	9030617O03Rik
27.2041	27.3371	26.9326	27.1758	26.8515	27.3266	27.2781	27.2583	0.988817	Q61464;E9QML5;Q61464-4;E9QKZ7;Q61464-7;Q61464-2;Q61464-5	Zinc finger protein 638	Znf638;Zfml
27.3991	27.3912	27.2573	27.5223	27.3818	27.7025	27.5396	27.447	0.916845	Q8CHY6;E9QMN5	Transcriptional repressor p66 alpha	Gatad2a
27.9251	27.9201	27.8783	27.7833	27.9913	28.1045	28.1612	28.0975	0.863384	Q99KW3;E9QMQ3;Q99KW3-1;Q99KW3-4;Q99KW3-2;G5E8W1	TRIO and F-actin-binding protein	Triobp
30.9577	31.1853	31.0631	31.2195	31.0066	31.2024	31.1464	31.2403	0.970954	Q4KML4;E9QMV2	Costars family protein ABRACL	Abracl
30.6686	30.7522	30.8144	30.8731	30.4169	30.3764	30.343	30.3733	1.31921	P05622;E9QPE2;E9QN12	Platelet-derived growth factor receptor beta;Tyrosine-protein kinase receptor	Pdgfrb
29.8611	29.7709	29.8641	29.8471	29.7106	29.7963	29.8482	29.7917	1.03462	E9QN31;Q922K7	Probable 28S rRNA (cytosine-C(5))-methyltransferase	Nop2
26.6225	26.0243	NaN	26.3772	26.8038	NaN	26.9411	NaN	0.692019	Q91WK0;E9QN52;Q91WK0-2	Leucine-rich repeat flightless-interacting protein 2	Lrrfip2
31.1527	31.13	31.1096	31.206	31.1675	31.2101	31.2938	31.2655	0.943013	P02469;E9QN70	Laminin subunit beta-1	Lamb1
28.3668	28.3249	28.2289	28.294	28.2649	28.2427	28.2265	28.3076	1.03041	E9QN99;Q8VCR7	Alpha/beta hydrolase domain-containing protein 14B	Abhd14b
30.1464	30.0962	30.1734	30.2289	30.7697	30.8588	30.9271	30.9345	0.61077	E9QNA7;Q62417-2;Q62417;E9Q6A3;Q62417-5;Q62417-4;E9PYX6;Q62417-6;Q62417-3	Sorbin and SH3 domain-containing protein 1	Sorbs1
NaN	NaN	25.5402	NaN	25.6455	25.8552	25.6588	NaN	0.882927	Q5XG73;E9QNH7;Q5XG73-2;Q5XG73-3	Acyl-CoA-binding domain-containing protein 5	Acbd5
32.9655	33.0002	33.0287	32.9302	32.7854	32.8727	32.941	32.9469	1.06781	E9QNN1;O70133;O70133-2;O70133-3	ATP-dependent RNA helicase A	Dhx9
29.1536	NaN	29.3781	NaN	29.0484	29.4262	NaN	29.9977	0.855644	P62984;E9QNP0;E9Q9J0;J3QK04;E9Q4P0	Ubiquitin-60S ribosomal protein L40;Ubiquitin;60S ribosomal protein L40	Uba52;Kxd1;Gm7808
27.777	27.9352	27.9519	27.912	27.5783	28.0009	28.2258	28.0843	0.947173	E9QNR6;Q8VD62	UPF0696 protein C11orf68 homolog	AI837181;Bles03
24.69	24.5854	24.8798	24.9798	24.6923	24.8373	24.7103	24.5797	1.05618	Q80YQ2;F8WJB0;E9QNV2;Q80YQ2-2;H3BK33	Mediator of RNA polymerase II transcription subunit 23	Med23
26.9989	26.9473	27.0529	26.7532	26.854	NaN	NaN	NaN	1.06001	E9QNW6;Q8VDG7	Platelet-activating factor acetylhydrolase 2, cytoplasmic	Pafah2
27.7297	27.6602	27.6132	27.7435	27.2404	26.8557	26.682	27.2197	1.61016	Q60751;E9QNX9	Insulin-like growth factor 1 receptor;Insulin-like growth factor 1 receptor alpha chain;Insulin-like growth factor 1 receptor beta chain;Tyrosine-protein kinase receptor	Igf1r
26.8997	26.9477	27.1562	26.8234	27.2966	27.3423	27.7577	27.6398	0.681908	Q9JLC8;E9QNY8;Q9JLC8-3;Q9JLC8-2	Sacsin	Sacs
28.1535	28.0912	28.2135	28.0671	28.0694	28.2918	28.6483	27.6966	0.969155	E9QP00;Q6PFR5	Transformer-2 protein homolog alpha	Tra2a
29.1273	NaN	28.4969	28.889	29.7827	NaN	NaN	NaN	0.519442	Q6ZWQ0;E9QP46	Nesprin-2	Syne2
29.0428	28.845	29.08	28.9504	29.2579	29.3746	29.1524	29.3838	0.805175	E9QP49;Q99MS7;Q99MS7-2;G5E8Y6;Q99MS7-4;Q99MS7-5;Q99MS7-3	EH domain-binding protein 1-like protein 1	Ehbp1l1
31.1642	31.0241	31.0034	31.1676	30.628	31.3457	30.8759	31.225	1.05057	Q99JW4;E9QP62;Q9D7B2	LIM and senescent cell antigen-like-containing domain protein 1	Lims1
29.3277	29.5281	29.0364	29.4353	29.5134	29.0814	29.2082	29.2952	1.04053	E9QP99;P55937;P55937-1	Golgin subfamily A member 3	Golga3
NaN	28.0744	28.0769	28.1602	NaN	27.6907	27.7509	27.8379	1.26927	E9QPA6		Cct6a
27.6165	27.6215	27.616	27.4095	27.1346	27.1551	27.1006	27.1182	1.35543	Q05920;G5E8R3;E9QPD7	Pyruvate carboxylase, mitochondrial;Pyruvate carboxylase	Pc;Pcx
31.4376	31.4008	31.4281	31.584	33.6908	33.5397	33.6999	33.5379	0.224619	E9QPE7		Myh11
28.7249	29.1751	28.8811	28.016	28.2731	29.818	29.9662	28.622	0.721689	Q6A026;E9QPI5	Sister chromatid cohesion protein PDS5 homolog A	Pds5a
NaN	25.4548	NaN	NaN	NaN	NaN	NaN	NaN	NaN	Q8R1U2;E9QPK1	Cell growth regulator with EF hand domain protein 1	Cgref1
NaN	NaN	NaN	NaN	NaN	NaN	23.703	NaN	NaN	Q8VE91;E9QPM1;Q8VE91-3;Q8VE91-2	Protein FAM134B	Fam134b
26.1712	25.8004	25.8265	26.3045	NaN	NaN	NaN	NaN	NaN	E9QPQ8;Q8JZS9	39S ribosomal protein L48, mitochondrial	Mrpl48
NaN	26.6323	26.6054	26.4228	NaN	NaN	NaN	NaN	NaN	E9QPX1;P39061-2;P39061-1;P39061	Collagen alpha-1(XVIII) chain;Endostatin	Col18a1
27.9725	28.042	28.034	27.8417	27.7907	28.0409	28.1436	28.0339	0.979607	Q9CXZ1;E9QPX3	NADH dehydrogenase [ubiquinone] iron-sulfur protein 4, mitochondrial	Ndufs4
25.4775	NaN	NaN	NaN	NaN	NaN	NaN	NaN	NaN	Q70FJ1;E9QQ10;Q70FJ1-3;Q70FJ1-2	A-kinase anchor protein 9	Akap9
NaN	NaN	NaN	NaN	NaN	NaN	NaN	25.3401	NaN	Q62407;E9QQ25;Q62407-2;Q62407-4;Q62407-3	Striated muscle-specific serine/threonine-protein kinase	Speg
26.4612	26.4557	26.0936	26.3099	27.4839	27.388	27.1951	27.4113	0.486504	G5E867;F2Z3U3;F2Z4B7		Raph1
NaN	NaN	NaN	NaN	NaN	22.3468	NaN	NaN	NaN	Q9EP53;Q9EP53-2;F2Z3W0;F2Z3X2;Q9EP53-4;Q9EP53-3	Hamartin	Tsc1
26.6816	26.4845	26.4408	26.6393	26.9373	26.4491	NaN	26.0518	1.05859	Q9Z2A0;F2Z400;Q3TRL2;F2Z3X6;F2Z4A5	3-phosphoinositide-dependent protein kinase 1	Pdpk1
NaN	NaN	NaN	NaN	NaN	NaN	NaN	28.2261	NaN	P97318-2;P97318;P97318-3;F6VRL0;F2Z465;P97318-4;P97318-5;P97318-6;P97318-8	Disabled homolog 1	Dab1
NaN	NaN	NaN	NaN	NaN	NaN	NaN	23.4865	NaN	Q9R1C6;F2Z490	Diacylglycerol kinase epsilon	Dgke
32.1587	32.2279	32.1623	32.2581	31.7527	31.9581	31.9379	31.8637	1.25149	F2Z4A3		Fat1
NaN	NaN	25.7085	NaN	NaN	25.5349	25.2998	25.4949	1.20189	Q9Z2V5;F6Q3W9;B1AUA8	Histone deacetylase 6	Hdac6
NaN	NaN	NaN	NaN	NaN	NaN	NaN	23.3801	NaN	Q5U430;F6QC57;Q5U430-3	E3 ubiquitin-protein ligase UBR3	Ubr3
26.7507	26.9385	NaN	26.8711	26.4923	NaN	NaN	NaN	1.28443	Q9CWX9;F6QKD2	Probable ATP-dependent RNA helicase DDX47	Ddx47
33.0089	32.6748	32.879	32.9031	32.8148	32.5199	32.6977	32.938	1.08964	P47915;F6QL70;D3Z1N9;W4VSN7	60S ribosomal protein L29	Rpl29;Gm17669;Gm10709;Gm3550
NaN	NaN	NaN	NaN	NaN	NaN	NaN	23.2457	NaN	Q91WC9;F6QP10	Sn1-specific diacylglycerol lipase beta	Daglb
NaN	25.2858	NaN	25.5653	NaN	NaN	NaN	NaN	NaN	F6ZTK6;F6QRT3;G3UW79;Q924M1;F7BAT9;Q9D0T2	Dual specificity protein phosphatase 12	Dusp12
27.2933	26.4204	26.7466	26.6934	26.3983	26.8815	26.9023	26.5731	1.07149	Q3UQN2;F6RG68;J3QPQ1;Q3UQN2-2;Q3UQN2-3	FCH domain only protein 2	Fcho2
NaN	NaN	NaN	NaN	NaN	NaN	NaN	23.478	NaN	Q9JJK2;F6RJV6	LanC-like protein 2	Lancl2
27.8887	27.9826	28.0293	27.9282	28.2062	28.1376	27.9159	28.3679	0.870732	Q9CQE7;F6RK81;F6UIS1;Q9CQE7-2	Endoplasmic reticulum-Golgi intermediate compartment protein 3	Ergic3
NaN	26.6652	NaN	NaN	NaN	NaN	NaN	NaN	NaN	Q8CIV2;F6RN19;Q8CIV2-2	Membralin	Tmem259
30.4797	30.5161	30.4491	30.5293	30.4712	30.6166	30.74	30.6096	0.92287	F6RPJ9;Q9JHR7	Insulin-degrading enzyme	Ide
NaN	NaN	NaN	NaN	NaN	NaN	NaN	23.7263	NaN	Q922X9;F6RXJ8	Protein arginine N-methyltransferase 7	Prmt7
23.444	NaN	NaN	NaN	NaN	NaN	NaN	NaN	NaN	F6RXX6;Q9CWR1-3;Q9CWR1;Q9CWR1-2	WD repeat-containing protein 73	Wdr73
NaN	NaN	NaN	NaN	NaN	NaN	NaN	24.3571	NaN	Q6PGD0;G3UXG8;F6RYG0	All-trans retinoic acid-induced differentiation factor	Atraid
NaN	NaN	NaN	NaN	NaN	NaN	NaN	26.081	NaN	Q8N9S3;F6S1R2;Q8N9S3-2;Q8N9S3-3;A2AF81	Activator of 90 kDa heat shock protein ATPase homolog 2	Ahsa2
27.0841	26.9248	27.3186	27.3205	26.7645	26.7135	27.5598	27.1843	1.07659	Q9JJZ4;F6SPK0;B1AWT7	Ubiquitin-conjugating enzyme E2 J1	Ube2j1
28.0861	28.1372	28.1736	28.1282	28.2321	28.2245	28.1979	28.2707	0.933017	Q91VA6;F6SQH7	Polymerase delta-interacting protein 2	Poldip2
NaN	NaN	NaN	NaN	NaN	NaN	NaN	24.2766	NaN	Q9CXS4;F6SS03	Centromere protein V	Cenpv
NaN	NaN	NaN	NaN	NaN	NaN	18.9015	NaN	NaN	F6T2Z7;F6RGN9		Cald1
28.96	28.8982	28.9047	28.8843	28.6776	29.1406	29.2585	28.8138	0.958716	Q60739;F6TCF9;Q60739-2	BAG family molecular chaperone regulator 1	Bag1
NaN	NaN	NaN	NaN	NaN	26.4599	NaN	26.1208	NaN	Q8R143;F6TFF2;E0CXB5	Pituitary tumor-transforming gene 1 protein-interacting protein	Pttg1ip
NaN	NaN	NaN	NaN	NaN	NaN	NaN	25.3634	NaN	Q7TQK4;F6TGV1	Exosome complex component RRP40	Exosc3
26.3242	25.9446	26.1864	26.2162	25.8782	26.1551	26.0861	26.0691	1.08728	Q8BX90;F6TLV3;E0CXY0	Fibronectin type-III domain-containing protein 3A	Fndc3a
26.5848	26.602	26.8695	26.3999	26.6648	26.8997	26.8971	26.827	0.865677	P08103;F6UND7;P08103-2	Tyrosine-protein kinase HCK	Hck
31.3525	31.2074	31.2636	31.462	31.34	31.4449	31.761	31.4589	0.88281	Q9R0Q3;F6V6T4;Q8BPI2	Transmembrane emp24 domain-containing protein 2	Tmed2
29.6029	29.4788	29.5016	29.7143	29.7752	29.4462	29.613	29.9146	0.924759	Q9Z130;F6VQH5	Heterogeneous nuclear ribonucleoprotein D-like	Hnrnpdl
32.7659	32.7217	32.7887	32.6998	32.7061	32.9834	33.0243	32.8713	0.899846	P68254;F6YY69;F6VW30;P68254-2	14-3-3 protein theta	Ywhaq
28.3615	28.398	28.4437	28.2716	28.5599	28.4387	28.6987	28.4144	0.895506	P42567;F6W2Q5;H3BK65;Q5JC28	Epidermal growth factor receptor substrate 15	Eps15
25.5418	25.697	25.5498	25.3698	24.8706	25.7178	25.5871	25.5495	1.07799	Q6ZQ93;F6WJB7;F7BSN3;F6SZG2;Q6ZQ93-4;Q6ZQ93-3;Q6ZQ93-2;Z4YLQ1	Ubiquitin carboxyl-terminal hydrolase 34;Ubiquitin carboxyl-terminal hydrolase	Usp34
28.5801	28.4227	28.6429	28.4061	28.6654	28.7214	29.2464	28.5307	0.824719	F6WR04;O70370	Cathepsin S	Ctss
26.9748	26.918	27.0392	26.9552	26.6618	27.2246	27.2201	27.3141	0.911712	Q8BVI5;F7CJY7;F6X4N5;B7ZCB8	Syntaxin-16	Stx16
26.4903	26.6009	26.492	26.9426	26.7938	26.4882	27.2454	26.2427	0.95855	Q8BRN9;F6XC25	Coiled-coil and C2 domain-containing protein 1B	Cc2d1b
NaN	NaN	NaN	NaN	NaN	25.3761	NaN	NaN	NaN	Q56A08;F6XU64	G patch domain and KOW motifs-containing protein	Gpkow
27.7714	28.1791	27.8226	27.7697	28.1186	27.8748	28.1261	27.9425	0.913958	Q3UMT1;F6XWD4	Protein phosphatase 1 regulatory subunit 12C	Ppp1r12c
33.7391	33.7717	33.6737	33.8066	33.7844	33.8915	33.7746	33.9415	0.932887	P62270;F6YVP7;S4R1N6	40S ribosomal protein S18	Rps18;Gm10260
30.6869	30.593	30.6219	30.6327	30.5863	30.5094	30.5275	30.2071	1.12979	Q9CR21;F6ZFT1;F8WJ64	Acyl carrier protein, mitochondrial;Acyl carrier protein	Ndufab1
26.2204	26.615	26.501	26.2931	26.3859	26.6092	NaN	26.5053	0.937728	Q9D6Y9;F6ZHD8;G3UW30	1,4-alpha-glucan-branching enzyme	Gbe1
31.272	31.4298	31.4623	31.4287	31.544	31.9694	31.9298	31.9429	0.732893	F7AA26		Palm2Akap2
27.209	27.0417	27.1958	27.0736	26.7363	27.0309	26.9198	26.7756	1.20112	F7AC41;Q91VU7		Pus7
27.3746	27.4592	27.5018	27.7097	27.3793	NaN	NaN	NaN	1.09583	F7ACR9;F6Q750		Macf1
NaN	NaN	NaN	NaN	NaN	NaN	NaN	25.215	NaN	Q8K2Y9;F7AVU1;Q8K2Y9-2;E0CZ84;E0CXR5	Malcavernin	Ccm2
NaN	NaN	NaN	NaN	NaN	NaN	21.1087	NaN	NaN	Q9WV89;F7AX23;Q9WV89-4;Q9WV89-2	Syntaxin-binding protein 4	Stxbp4
27.2754	27.0887	27.1171	27.3132	27.1614	27.3567	27.6836	27.0844	0.918324	F7B6A4;F7C1U0		Kctd17
NaN	NaN	NaN	NaN	NaN	NaN	NaN	24.8273	NaN	Q8C033;F7BCP8;F7BQE4;Q8C033-2	Rho guanine nucleotide exchange factor 10	Arhgef10
28.1366	28.0781	28.2127	28.1368	28.0342	NaN	NaN	NaN	1.07687	F7BE84		Ankrd50
NaN	NaN	NaN	NaN	NaN	NaN	23.6897	NaN	NaN	F7BJB9		Morc3
25.7019	NaN	25.5187	NaN	NaN	25.8928	NaN	25.8791	0.826078	Q5M8N0;F7C0H6	CB1 cannabinoid receptor-interacting protein 1	Cnrip1
NaN	NaN	25.4798	NaN	NaN	25.8239	25.8498	NaN	0.780759	Q8R1G6;F7C957	PDZ and LIM domain protein 2	Pdlim2
26.5779	26.6929	26.7955	26.9633	26.775	27.5429	27.4551	27.2927	0.702697	Q9ESK9;F7CC56;F7CCJ3	RB1-inducible coiled-coil protein 1	Rb1cc1
25.7235	25.5929	25.6499	25.6925	25.6095	25.5665	NaN	25.7008	1.02747	Q8BIE6;H3BKK8;F7CDA2;H3BK97;H3BL79;H3BIZ7;Q8BIE6-2;Q920B0;D3Z6Q1;Q6ZQ04;Q920B0-2	FERM domain-containing protein 4A;FERM domain-containing protein 4B	Frmd4a;Frmd4b
NaN	NaN	NaN	NaN	NaN	27.0599	26.7477	27.5426	NaN	F7CVJ5		Ahnak2
26.1474	26.2175	26.0875	26.2033	26.268	26.19	26.251	26.086	0.97615	Q9CQN7;F7CXS7	39S ribosomal protein L41, mitochondrial	Mrpl41;Gm6434
NaN	NaN	NaN	NaN	NaN	NaN	NaN	25.2971	NaN	Q78HU7;F7D1I5;G3UXY6	Glycophorin-C	Gypc
33.5289	33.5051	33.5339	33.5689	33.976	33.9078	34.0941	33.889	0.740964	F7DBB3;Q3URZ6		Ahnak2
28.8778	28.9529	28.7461	28.7934	28.7401	28.8026	28.6946	28.6687	1.08376	F8VPK0		Ttc37
31.5019	31.5426	31.5161	31.5941	31.9619	32.1169	32.1103	32.1394	0.686128	F8VPK5;P70336;P70336-2	Rho-associated protein kinase;Rho-associated protein kinase 2	Rock2
27.0903	27.481	27.4967	27.4281	27.2712	27.1981	27.4888	27.382	1.0274	Q61194;F8VPL2;Q61194-2	Phosphatidylinositol 4-phosphate 3-kinase C2 domain-containing subunit alpha	Pik3c2a
29.6392	29.4411	29.4879	29.6618	29.3934	29.5358	29.6528	29.5882	1.01042	F8VPL5;E9PVG7;P97820;P83510;E0CZF8;E0CZD7;E0CXD6;E0CY98;E9PUL9;B9EKN8;B2RQ80;P83510-2	Mitogen-activated protein kinase kinase kinase kinase 4;Traf2 and NCK-interacting protein kinase	Map4k4;Tnik
28.6901	28.7865	28.7439	28.8072	28.6904	28.7295	28.8279	28.742	1.00659	Q99MI1;V9GXP8;F8VPM7;V9GXF0;Q99MI1-2;V9GXH3;V9GWT6;V9GX53	ELKS/Rab6-interacting/CAST family member 1	Erc1
28.5928	28.4924	28.4677	28.4266	28.7494	28.9882	29.0423	28.9804	0.734482	F8VPN4;F6XXE6		Agl
26.5533	26.3935	NaN	26.1505	26.3729	NaN	NaN	NaN	0.995068	F8VPP8		Zc3h7b
31.9097	31.8687	31.9026	31.9825	32.3429	32.6335	32.4995	32.4816	0.671985	Q8BVA4;F8VPR1	Leiomodin-1	Lmod1
32.0065	32.0286	32.0175	32.1297	31.6105	31.7154	31.5227	31.7061	1.32583	F8VPU2	FERM, RhoGEF and pleckstrin domain-containing protein 1	Farp1
29.5764	29.407	29.519	29.4131	29.028	29.0985	28.9307	29.1854	1.33628	Q6A4J8;F8VPX1;E9PXY8;Q6A4J8-3;Q6A4J8-2	Ubiquitin carboxyl-terminal hydrolase 7;Ubiquitin carboxyl-terminal hydrolase	Usp7
25.9013	26.0151	NaN	25.9325	26.4234	26.6153	26.4407	26.9937	0.629099	F8VQ05		Fryl
NaN	NaN	NaN	NaN	NaN	NaN	NaN	26.1732	NaN	F8VQ06;Q61810-2;Q61810	Latent-transforming growth factor beta-binding protein 3	Ltbp3
29.3152	29.4514	29.6426	29.4834	29.6062	29.6008	29.6367	29.5277	0.920379	Q8VI36;Q8VI36-2;F8VQ28	Paxillin	Pxn
NaN	NaN	NaN	NaN	NaN	NaN	23.1043	NaN	NaN	F8VQ29		Iqgap3
NaN	NaN	NaN	NaN	NaN	NaN	NaN	23.9174	NaN	Q01341;F8VQ52	Adenylate cyclase type 6	Adcy6
25.2301	25.0392	25.18	NaN	25.549	NaN	25.2321	24.5115	1.03687	Q8R418;F8VQ54;Q8R418-2	Endoribonuclease Dicer	Dicer1
27.2656	27.5595	27.278	27.4065	27.5011	27.4148	27.9392	27.788	0.821667	F8VQ87;P97789;P97789-2;P97789-3	5-3 exoribonuclease 1	Xrn1
NaN	NaN	NaN	NaN	NaN	25.8611	26.0479	25.6295	NaN	Q8VDD9;F8VQ93	PH-interacting protein	Phip
26.5469	26.7674	26.6528	26.6281	26.9269	27.1519	26.8251	26.6768	0.843012	Q6Y685;F8VQ95;Q6Y685-2	Transforming acidic coiled-coil-containing protein 1	Tacc1
31.2024	31.0097	31.0686	31.1089	30.9875	31.1531	31.1073	31.0066	1.02369	F8VQC1;E9Q740	Signal recognition particle subunit SRP72	Srp72
32.0769	32.098	32.0304	32.0529	32.0969	32.0673	32.1586	31.9776	0.992714	F8VQC7;Q61595;Q61595-5;Q61595-6;Q61595-9;Q61595-15;Q61595-3;Q61595-10;Q61595-7;Q61595-11;Q61595-2;Q61595-12;Q61595-16;Q61595-14;Q61595-4;Q61595-8;Q61595-13	Kinectin	Ktn1
27.0023	27.192	26.9606	27.0236	26.7158	27.046	26.8202	26.8112	1.14578	Q8BTY2;Q8BTY2-2;F8VQC9	Sodium bicarbonate cotransporter 3	Slc4a7
NaN	25.0197	NaN	25.4157	24.956	NaN	NaN	NaN	1.19889	Q8VHH5;F8VQE9	Arf-GAP with GTPase, ANK repeat and PH domain-containing protein 3	Agap3
27.9827	27.6939	28.0437	27.75	27.9455	28.4601	27.454	27.9017	0.950824	P02468;F8VQJ3	Laminin subunit gamma-1	Lamc1
NaN	26.3166	26.4755	NaN	NaN	NaN	NaN	NaN	NaN	Q8R4H2;F8VQN6	Rho guanine nucleotide exchange factor 12	Arhgef12
NaN	NaN	NaN	NaN	25.8946	NaN	26.0194	NaN	NaN	Q64324;F8WGM5	Syntaxin-binding protein 2	Stxbp2
NaN	NaN	NaN	24.1224	NaN	NaN	NaN	NaN	NaN	Q922M3;F8WGQ9;S4R2A3	BTB/POZ domain-containing adapter for CUL3-mediated RhoA degradation protein 3	Kctd10
28.9711	NaN	28.748	28.7082	NaN	NaN	NaN	NaN	NaN	Q497V5;F8WGW3;Q497V5-2	S1 RNA-binding domain-containing protein 1	Srbd1
29.371	29.3464	29.3219	29.3928	29.4804	29.4487	29.6147	29.3432	0.924199	F8WH23;Q61581;E9Q5D9	Insulin-like growth factor-binding protein 7	Igfbp7
28.723	28.3998	28.6023	28.6626	28.817	28.7975	28.7255	28.8444	0.871049	Q09014;S4R293;F8WH69	Neutrophil cytosol factor 1	Ncf1
NaN	NaN	NaN	NaN	NaN	NaN	NaN	NaN	NaN	F8WH78;Q9ER63	Tumor necrosis factor receptor superfamily member 23	Tnfrsf23
32.1181	32.19	32.2241	32.2298	32.0301	32.1141	32.12	32.0209	1.08615	Q61543;F8WHM5	Golgi apparatus protein 1	Glg1
NaN	NaN	NaN	NaN	NaN	NaN	26.9942	NaN	NaN	F8WHT3;Q7TPM1;F7AYW2	Protein PRRC2B	Prrc2b
29.109	29.1156	29.1717	29.1329	29.1109	28.968	29.0479	29.0732	1.0587	Q4VA53;F8WHU5;Q4VA53-3;Q4VA53-2	Sister chromatid cohesion protein PDS5 homolog B	Pds5b
28.6264	28.5016	28.6378	28.6718	28.6404	28.2218	28.7235	28.6655	1.03283	Q62384;F8WHU9;F8WIG4	Zinc finger protein ZPR1	Zpr1
26.215	NaN	NaN	NaN	NaN	26.5248	NaN	NaN	0.806754	F8WHV1;Q9D187	Mitotic spindle-associated MMXD complex subunit MIP18	Fam96b
NaN	NaN	NaN	NaN	NaN	NaN	NaN	24.6178	NaN	Q3TWL2;F8WHW3	Type 1 phosphatidylinositol 4,5-bisphosphate 4-phosphatase	Tmem55b
29.5422	29.4024	29.3669	29.433	29.2626	28.9335	29.1178	28.9027	1.30312	Q8K4B0;F8WHY8;E9PX23	Metastasis-associated protein MTA1	Mta1
27.7089	27.7262	28.2752	28.1606	27.1358	27.2134	26.9728	27.1273	1.80926	Q61508;F8WI14;Q61508-2	Extracellular matrix protein 1	Ecm1
30.9943	31.0088	31.0658	30.9805	30.9642	30.9454	31.1163	30.9711	1.00912	Q8K019;F8WI22;Q8K019-2;Q8K019-3	Bcl-2-associated transcription factor 1	Bclaf1
30.372	30.3965	30.382	30.3762	30.3998	30.2929	30.276	30.4291	1.02259	F8WI30;Q9CY18;F6RSR4;F7D3B8	Sorting nexin-7	Snx7
37.1606	37.098	37.1426	37.1171	37.1449	37.1061	37.1565	37.0615	1.00858	F8WID5		Tpm1
31.0678	31.0501	31.079	31.0013	31.068	30.9256	30.9382	30.898	1.06592	F8WIE5;Q69ZR2	E3 ubiquitin-protein ligase HECTD1	Hectd1
24.6383	24.4778	24.6342	NaN	25.0033	25.0759	25.8058	NaN	0.610657	P10923;F8WIP8	Osteopontin	Spp1
29.1669	29.0705	29.0527	28.9579	29.2483	29.0438	29.2616	29.1435	0.925112	F8WIT2	Annexin	Anxa6
27.8267	27.674	27.8069	27.9144	27.9182	NaN	27.8416	NaN	0.949737	Q9D1K7;H7BXB9;F8WIU1;Q6IR22	UPF0687 protein C20orf27 homolog	1700037H04Rik
NaN	27.664	27.1982	27.404	27.6873	28.0427	26.5607	27.4543	0.990217	Q64523;Q6GSS7;F8WIX8	Histone H2A type 2-C;Histone H2A type 2-A;Histone H2A	Hist2h2ac;Hist2h2aa1;Hist1h2al
33.1704	33.0687	33.0967	33.0398	33.009	33.1469	33.0044	33.392	0.969844	P62245;F8WJ41;D3Z712;D3YVB4	40S ribosomal protein S15a	Rps15a
NaN	NaN	NaN	NaN	NaN	NaN	25.3211	NaN	NaN	Q3UMY5;F8WJ93;Q3UMY5-4;Q3UMY5-2;Q3UMY5-3	Echinoderm microtubule-associated protein-like 4	Eml4
26.0162	25.8756	25.7498	26.1102	26.146	NaN	25.5188	NaN	1.0759	Q9ESV0;F8WJA0	ATP-dependent RNA helicase DDX24	Ddx24
28.6021	28.3725	28.5696	28.4675	28.6394	28.1249	28.5089	28.5335	1.03616	Q80X82;F8WJD4	Symplekin	Sympk
30.4542	30.5503	30.516	30.5252	30.5597	30.5861	30.3088	30.3351	1.04536	P62996;F8WJG3	Transformer-2 protein homolog beta	Tra2b
29.459	29.5358	29.5423	29.4564	29.3903	29.5358	29.4271	29.4355	1.03613	G3UVU2;Q62203;D3YW09	Splicing factor 3A subunit 2	Sf3a2
26.1937	NaN	NaN	NaN	26.1215	NaN	26.2309	NaN	1.0122	Q99K43;G3XA79;G3UY19;G3UW86;G3UWQ7;G3UXT4	Protein regulator of cytokinesis 1	Prc1
NaN	NaN	NaN	NaN	NaN	27.247	28.5909	27.0624	NaN	Q9Z172;G3UZ60;G3UWI9;G3UWX9;G3UZA7;Q9Z172-2	Small ubiquitin-related modifier 3	Sumo3
NaN	NaN	NaN	NaN	NaN	NaN	21.9405	NaN	NaN	P35601;Q5U4B1;G3UWX1;G3X8Z6;G3UXL4;P35601-2	Replication factor C subunit 1	Rfc1
NaN	NaN	NaN	NaN	NaN	NaN	NaN	24.045	NaN	O88379;G3UWZ0	Bromodomain adjacent to zinc finger domain protein 1A	Baz1a
28.7656	28.7502	28.7569	28.7525	28.5792	28.8848	28.8956	28.7111	0.992146	G8JL74;G3UXA6;Q8BHD7;Q8BHD7-2;G3UZ01	Polypyrimidine tract-binding protein 3	Ptbp3
27.5215	27.5689	27.3406	27.194	27.2584	27.5319	NaN	27.4001	1.00657	Q8BWW9;G3UXH4;Q8BWW9-2;G3UZM9;Q8BWW9-3	Serine/threonine-protein kinase N2	Pkn2
31.069	30.9648	31.0793	31.0306	30.7382	30.8687	30.7131	30.7687	1.2006	Q9D7G0;G3UXL2	Ribose-phosphate pyrophosphokinase 1	Prps1;Prps1l3
NaN	29.2168	28.4783	28.5396	NaN	NaN	NaN	NaN	NaN	P28700;P28704;Q8VCR0;Q6LC96;G3UXP8;Q3TWJ1;P28704-2;P28705;E9Q9V9	Retinoic acid receptor RXR-alpha;Retinoic acid receptor RXR-beta;Retinoic acid receptor RXR-gamma	Rxra;Rxrb;Rxrg
26.9628	26.619	26.8129	26.971	27.5245	28.0053	28.2901	28.0208	0.460493	G3UY21;G3UXV6;G3UZ88;G3UYX7;Q9R1B9;G3X909	Slit homolog 2 protein;Slit homolog 2 protein N-product;Slit homolog 2 protein C-product	Slit2
30.153	30.1171	30.182	30.132	30.1385	30.2515	30.3431	30.1366	0.951714	G3UXW9;Q99LD4;Q3MIA8;B1ATU4;Q99LD4-2	COP9 signalosome complex subunit 1	Gps1
31.5543	31.6409	31.5712	31.5299	31.5686	31.4576	31.5159	31.3374	1.0749	P97371;G3UXZ5;G3UXY0;G3UWN9;G3X9K9	Proteasome activator complex subunit 1	Psme1
29.8322	29.8119	29.9665	29.797	29.6527	29.8557	30.0697	30.0512	0.962311	Q8CCS6;G3UY42;Q8CCS6-2;D3YUB9;D3Z5F7;D3Z055;G3UWS5	Polyadenylate-binding protein 2	Pabpn1;Gm20521
27.0183	NaN	27.4616	26.9342	26.4484	25.9364	NaN	NaN	1.92603	P24860;Q68EM3;G3UY65	G2/mitotic-specific cyclin-B1	Ccnb1
29.503	29.312	29.2879	29.4268	28.9782	28.9397	29.1681	29.1246	1.25682	Q9ESZ8;Q3UHU8;G3UYD0;Q9ESZ8-5;Q9ESZ8-4;Q9ESZ8-3;Q9ESZ8-6;Q9ESZ8-2	General transcription factor II-I	Gtf2i
28.8541	28.8251	28.7545	28.9709	28.9792	29.1055	29.1683	29.109	0.847127	Q6Y7W8;G3UYG6;G3UWR2;G3UYR9;G3UZX7	PERQ amino acid-rich with GYF domain-containing protein 2	Gigyf2
25.4511	NaN	25.2222	NaN	25.288	NaN	NaN	NaN	1.0343	Q8R1F9;G3UYU5	Ribonuclease P protein subunit p40	Rpp40
32.0899	32.2315	32.1413	32.1522	32.4867	32.3512	32.0334	31.9751	0.960678	P62858;G3UYV7	40S ribosomal protein S28	Rps28
25.6241	25.5626	25.4988	25.7677	24.9468	25.8537	25.637	25.1826	1.15531	Q6VNB8;G3UYW1	WD repeat and FYVE domain-containing protein 3	Wdfy3
NaN	NaN	NaN	NaN	NaN	26.3752	NaN	NaN	NaN	Q8R366;G3UYZ1	Immunoglobulin superfamily member 8	Igsf8
27.2469	27.2591	27.2645	27.2167	27.0119	27.2377	27.0191	27.586	1.02323	P50431;G3UZ26;G3UYY1	Serine hydroxymethyltransferase, cytosolic;Serine hydroxymethyltransferase	Shmt1
27.0206	26.6982	NaN	NaN	27.1275	27.0346	27.2332	NaN	0.82796	P63013;V9GXM0;G3UZ44;P63013-2;Q9CY80	Paired mesoderm homeobox protein 1	Prrx1;Prrx2
27.6935	28.0108	27.766	28.0259	27.7074	27.3059	27.8033	27.7904	1.16659	G3UZ63;G3X961;Q921I2;G3UZG5	Kelch domain-containing protein 4	Klhdc4
28.486	29.0763	28.7687	28.6648	NaN	NaN	28.8685	28.9229	0.903283	G3UZA0;Q8BGA5	KRR1 small subunit processome component homolog	Krr1
29.5008	30.274	NaN	NaN	30.2093	30.0828	29.4014	29.7507	1.01843	G3UZM1;Q69ZK6	Probable JmjC domain-containing histone demethylation protein 2C	Jmjd1c
NaN	NaN	NaN	NaN	NaN	NaN	27.2253	NaN	NaN	P97493;G3UZY2	Thioredoxin, mitochondrial	Txn2
NaN	NaN	NaN	NaN	NaN	NaN	25.9948	NaN	NaN	P40201;G3V014;Q8C7Q2	Chromodomain-helicase-DNA-binding protein 1	Chd1
31.5639	31.7966	31.853	31.746	32.0285	31.4951	31.949	31.8037	0.946582	G3X8R0		Reep5
28.7438	28.5277	28.546	28.2861	28.7093	28.7395	28.7275	28.6503	0.882244	Q80VJ2;G3X8R2	Steroid receptor RNA activator 1	Sra1
26.2266	NaN	26.1367	NaN	26.1681	26.5475	26.1646	26.3989	0.908699	Q3UA37;G3X8R5	Glutamine-rich protein 1	Qrich1
NaN	NaN	NaN	26.485	NaN	NaN	NaN	NaN	NaN	P59759;Q5DTZ3;G3X8R8	MKL/myocardin-like protein 2	Mkl2
NaN	25.7655	25.6797	NaN	NaN	25.911	25.8517	25.123	1.06735	Q9CQV7;G3X8S1;Q9CQV7-3;Q9CQV7-2;D3Z5K6	Mitochondrial import inner membrane translocase subunit TIM14	Dnajc19
27.0576	27.8703	27.2797	27.407	27.1217	27.7715	NaN	27.7099	0.913378	Q0P678;H3BIW0;G3X8T2;H3BJN4;H3BJJ9	Zinc finger CCCH domain-containing protein 18	Zc3h18
31.3586	31.1411	31.249	31.3246	31.4621	31.666	31.5607	31.3288	0.849052	G3X8T3;P16675	Carboxypeptidase;Lysosomal protective protein;Lysosomal protective protein 32 kDa chain;Lysosomal protective protein 20 kDa chain	Ctsa
29.6203	29.7745	29.7999	29.8628	29.9184	29.8137	30.0246	29.6891	0.934927	G3X8U3		2210016F16Rik
NaN	25.8801	26.0968	26.3855	25.769	25.9953	NaN	26.0958	1.12306	O70458;G3X8V6;O70458-2	Oncostatin-M-specific receptor subunit beta	Osmr
NaN	NaN	NaN	NaN	NaN	NaN	NaN	24.5406	NaN	G3X8X0;Q05BH3		Dhx16
NaN	NaN	NaN	NaN	NaN	25.8183	NaN	NaN	NaN	Q62230;G3X8X6	Sialoadhesin	Siglec1
27.8533	27.9107	27.7144	27.7742	27.6794	28.3096	27.697	27.8212	0.95684	Q920Q4;G3X8X7;Q920Q4-2	Vacuolar protein sorting-associated protein 16 homolog	Vps16
31.5775	31.4521	31.5034	31.5396	31.6159	31.4972	31.4667	31.5839	0.984338	Q80UM3;G3X8Y3	N-alpha-acetyltransferase 15, NatA auxiliary subunit	Naa15
25.0711	25.0151	25.2786	25.1489	24.6068	25.3979	24.929	24.9607	1.11329	Q9DBR3;G3X920;Q9DBR3-3;Q9DBR3-2	Armadillo repeat-containing protein 8	Armc8
30.2914	30.2358	30.1903	30.3435	30.3412	30.3361	30.3833	30.4145	0.930756	G3X922		Dnajc13
28.3711	28.5247	28.3266	28.415	28.2088	28.2327	28.1591	28.3695	1.12259	G3X926;Q9JJ80;S4R1Y5;S4R2H5;S4R2R2	Ribosome production factor 2 homolog	Rpf2
31.9911	31.976	31.9638	31.9026	31.8599	31.7475	31.8134	31.9183	1.08945	G3X928;Q6NZC7	SEC23-interacting protein	Sec23ip
30.55	30.4874	30.4957	30.5655	30.3811	30.3805	30.4215	30.3385	1.10516	Q920B9;G3X956	FACT complex subunit SPT16	Supt16h;Supt16
25.4052	25.6183	25.4384	25.4921	25.526	25.4852	25.3511	25.2002	1.0702	Q9DBZ9;G3X960	Rho GTPase-activating protein SYDE1	Syde1
30.8103	30.7318	30.7837	30.7036	30.7732	31.0373	31.0556	30.8802	0.883177	G3X972		Sec24c
29.2731	29.269	29.2615	29.2377	29.6983	29.5621	29.6021	29.3668	0.813943	G3X973;Q8R4Y4;Q8R4Y4-2	Stabilin-1	Stab1
28.2295	28.533	28.5495	28.8259	28.0624	28.5929	28.4634	28.4889	1.09625	G3X9B1		Heatr1
NaN	NaN	NaN	NaN	NaN	NaN	NaN	23.1943	NaN	Q9R1S3;G3X9F1;Q9R1S3-2;Q9R1S3-3	GPI ethanolamine phosphate transferase 1	Pign
NaN	24.2636	NaN	24.4003	NaN	NaN	NaN	25.529	0.436166	Q3TCR7;G3X9G4		Dnm2
26.5833	26.769	27.4115	26.8484	26.4837	26.9998	26.5293	26.2243	1.26907	P42859;G3X9H5;P42859-2	Huntingtin	Htt
NaN	NaN	NaN	NaN	26.7483	NaN	NaN	NaN	NaN	G3X9J0;S4R2N4;S4R1S0		Sipa1l3
28.3544	28.4878	28.4194	28.5149	28.4393	28.3381	28.2879	28.4827	1.04039	Q148V7;G3X9J4;E9QM90;Q148V7-2;Q148V7-3	LisH domain and HEAT repeat-containing protein KIAA1468	Kiaa1468;2310035C23Rik
NaN	26.1562	25.7264	25.599	NaN	26.0155	26.4168	26.183	0.769557	G3X9K3;D3YYK9	Brefeldin A-inhibited guanine nucleotide-exchange protein 1	Arfgef1
NaN	NaN	NaN	NaN	NaN	NaN	NaN	23.7471	NaN	Q8R3Q2;G3X9K4	Serine/threonine-protein phosphatase 6 regulatory subunit 2	Ppp6r2
27.1811	27.3833	27.3567	27.2965	27.0698	27.0672	27.2541	27.2395	1.10707	Q9ER88;G3X9M0;Q9ER88-2;G3UWZ6	28S ribosomal protein S29, mitochondrial	Dap3
27.9576	28.4143	28.2562	28.3657	28.1159	28.6267	28.1217	28.2595	0.977725	Q9JKP5;G3X9Q0	Muscleblind-like protein 1	Mbnl1
NaN	NaN	NaN	NaN	NaN	25.0483	NaN	NaN	NaN	Q61738;G3X9Q1;Q61738-4;Q61738-2;Q61738-5;Q61738-3;Q61738-6	Integrin alpha-7;Integrin alpha-7 heavy chain;Integrin alpha-7 light chain	Itga7
28.3313	28.4501	28.3758	28.3311	28.464	28.4404	28.519	28.6522	0.903236	Q8BWW4;G3X9Q6;E9Q066	La-related protein 4	Larp4
26.1577	26.0193	26.1792	26.2299	27.2701	27.3224	27.1227	27.2823	0.465596	P06802;G3X9S2;P06802-2	Ectonucleotide pyrophosphatase/phosphodiesterase family member 1;Alkaline phosphodiesterase I;Nucleotide pyrophosphatase	Enpp1
31.0688	31.0547	31.0952	31.1239	31.1041	31.0919	30.9732	30.9004	1.04844	P97372;G3X9V0	Proteasome activator complex subunit 2	Psme2
28.5582	28.5037	28.6549	28.7425	28.6653	28.8834	29.0999	28.8327	0.837697	G5E8G0;G3X9W0;F6ZV59;Q60668-4;Q60668-2;E9Q5B6;F6SHF3	Heterogeneous nuclear ribonucleoprotein D0	Hnrnpd
27.2952	27.2767	27.4742	27.5198	27.423	27.6508	27.5367	27.3057	0.941103	G3X9Y5;E9Q735		Ube4a
25.6069	25.4823	25.501	25.4409	25.317	NaN	NaN	NaN	1.14138	Q8R060;H3BKB9;G3X9Z0;H3BJF6;H3BIZ1;D3Z6K4;H3BKZ0;H3BJ52	Protein zwilch homolog	Zwilch
31.3619	31.338	31.3526	31.3767	31.5625	31.4388	31.5839	31.5376	0.88675	G3XA17;F7CBP1		Eif4g2
NaN	NaN	NaN	NaN	NaN	NaN	NaN	23.3983	NaN	H3BL13;G3XA18;Q9D7V9	N-acylethanolamine-hydrolyzing acid amidase;N-acylethanolamine-hydrolyzing acid amidase subunit alpha;N-acylethanolamine-hydrolyzing acid amidase subunit beta	Naaa
24.6529	NaN	NaN	24.8715	26.5136	26.4263	25.842	NaN	0.353938	G3XA59		Lrrc32
26.8461	26.2322	26.2407	26.4794	26.2835	NaN	26.8694	26.0388	1.03696	G5E814;Q9D8B4	NADH dehydrogenase [ubiquinone] 1 alpha subcomplex subunit 11	Ndufa11
26.0768	25.4927	25.8648	25.9083	25.9528	25.6859	25.3912	25.6897	1.114	Q9CWR0;G5E825;Q9CWR0-2	Rho guanine nucleotide exchange factor 25	Arhgef25
30.7905	30.655	30.6051	30.6446	30.922	30.7198	30.7909	30.7677	0.916178	G5E829	Calcium-transporting ATPase	Atp2b1
NaN	NaN	NaN	25.2588	NaN	NaN	NaN	NaN	NaN	Q9ER64;G5E833	Oxysterol-binding protein-related protein 5;Oxysterol-binding protein	Osbpl5
31.3955	31.2929	31.3472	31.5073	31.0809	31.2907	31.4344	31.3776	1.06424	P56395;G5E850	Cytochrome b5	Cyb5a
31.8102	31.7859	31.8136	31.8068	31.7309	31.8307	31.8418	31.8167	0.999376	Q99NB9;G5E866	Splicing factor 3B subunit 1	Sf3b1
29.3802	29.4422	29.5008	29.4283	29.4255	29.4481	29.5932	29.4566	0.970651	G5E870	E3 ubiquitin-protein ligase TRIP12	Trip12
26.796	26.3843	26.3234	25.789	NaN	26.5626	NaN	NaN	0.847083	Q3TUH1;G5E881;D6RGT1;G3UWL8;Q3TUH1-2	Phosphatidate cytidylyltransferase, mitochondrial	Tamm41
27.4432	27.5279	27.2857	27.3707	27.4358	27.6045	27.5807	27.5252	0.914037	G5E884;O88643	Serine/threonine-protein kinase PAK 1	Pak1
29.116	29.0843	29.2225	29.1879	29.1198	28.854	28.8763	28.9533	1.15015	G5E895;D3Z494		Akr1b10
30.578	30.6347	30.6313	30.6613	30.5345	30.6865	30.7067	30.6057	0.995142	G5E896;Q3UJB9;Q3UJB9-2;D6RE33	Enhancer of mRNA-decapping protein 4	Edc4
28.8807	29.0602	29.0109	29.054	28.9023	28.9602	29.374	28.9719	0.965501	G5E897		Kdelc2
32.9167	32.8852	32.8675	32.9117	33.2108	33.2691	33.1341	33.2507	0.80057	G5E899;P22777	Plasminogen activator inhibitor 1	Serpine1
27.2256	27.4607	27.4443	27.3851	27.5701	27.4612	27.6371	27.5318	0.88815	Q8CI95;G5E8A0	Oxysterol-binding protein-related protein 11;Oxysterol-binding protein	Osbpl11
NaN	NaN	NaN	NaN	25.0292	NaN	NaN	24.7627	NaN	Q80XS6;G5E8A7	Protein Smaug homolog 2	Samd4b
NaN	NaN	26.1618	NaN	NaN	NaN	NaN	NaN	NaN	Q8BHL4;G5E8C3	Retinoic acid-induced protein 3	Gprc5a
29.547	29.4695	29.5065	29.533	29.5721	29.4016	29.6193	29.3679	1.01662	Q8BRH0;G5E8C4;Q8BRH0-2	Transmembrane and TPR repeat-containing protein 3	Tmtc3
29.1615	29.1318	29.3299	28.9173	29.2543	29.8048	29.5352	29.4151	0.775272	G5E8D6;Q9WVJ9;F6Z1C2;E9Q3F3;E9Q3N9	EGF-containing fibulin-like extracellular matrix protein 2	Efemp2
NaN	NaN	25.3178	25.1664	NaN	NaN	NaN	NaN	NaN	Q9QZB0;G5E8E0;F8WH97	Regulator of G-protein signaling 17	Rgs17
27.64	27.8661	27.7826	27.4642	28.4447	28.6989	29.0729	28.6729	0.488312	G5E8E1		Lrrfip1
29.7701	29.5754	29.8484	29.7542	29.5168	29.3556	28.9632	29.2447	1.38218	O70309;Q6PE70;G5E8F8;O70309-2	Integrin beta-5;Integrin beta	Itgb5
28.0761	28.1026	27.8408	27.8808	27.7871	28.266	28.6466	28.8067	0.757058	Q8CGZ0;G5E8I8	Calcium homeostasis endoplasmic reticulum protein	Cherp
NaN	NaN	NaN	NaN	NaN	NaN	NaN	23.8404	NaN	O35516;G5E8J0;O35516-2	Neurogenic locus notch homolog protein 2;Notch 2 extracellular truncation;Notch 2 intracellular domain	Notch2
28.5695	28.6119	28.6873	28.6674	28.5177	28.4395	29.0185	28.737	0.969861	Q8K1X1;G5E8J3	WD repeat-containing protein 11	Wdr11
26.6693	26.8038	26.7515	26.6112	26.7277	NaN	NaN	27.3614	0.792454	Q8CFE4;G5E8J9;Q80UY7	SCY1-like protein 2	Scyl2
34.9736	34.8931	34.9787	34.948	35.157	35.2228	35.1917	35.1747	0.847802	P06151;G5E8N5;D3Z736;D3YZQ9	L-lactate dehydrogenase A chain;L-lactate dehydrogenase	Ldha
27.4147	27.5347	27.7373	27.5809	27.113	27.5968	27.5272	27.3306	1.12896	Q9JLV6;G5E8N7;Q9JLV6-2;E9Q9A5	Bifunctional polynucleotide phosphatase/kinase;Polynucleotide 3-phosphatase;Polynucleotide 5-hydroxyl-kinase	Pnkp
NaN	27.8085	27.5899	NaN	28.113	27.7625	NaN	27.5455	0.928002	G5E8R1;G5E8R0;E9Q455		Tpm1
28.0132	27.7005	27.7178	27.952	27.8374	27.7216	27.6863	27.7013	1.07865	Q922D4;G5E8R4;Q922D4-2;Q922D4-3;Q922D4-4	Serine/threonine-protein phosphatase 6 regulatory subunit 3	Ppp6r3
26.7811	26.8748	26.6921	27.0387	26.6887	26.6619	26.0851	26.758	1.22965	G5E8R8;Q6P5G6	UBX domain-containing protein 7	Ubxn7
27.62	27.6219	27.5543	27.7879	27.5606	27.1354	27.2264	27.254	1.27626	Q99KB8;G5E8T9;Q99KB8-2;E9Q2H8;E9PYA3;D3YWI0	Hydroxyacylglutathione hydrolase, mitochondrial	Hagh
26.2924	26.6935	25.9295	26.403	26.3281	27.1446	27.25	26.4684	0.722878	O54940;Q91VL0;G5E8U9;F6VF29	BCL2/adenovirus E1B 19 kDa protein-interacting protein 2	Bnip2
26.7124	27.0206	26.8787	27.0129	26.8813	26.7487	26.8104	26.8168	1.06574	Q9JJT9;G5E8V8;F6RPD4	Phosphorylated adapter RNA export protein	Phax
30.2956	30.1496	30.3003	30.1901	30.3789	30.5262	30.4075	30.5305	0.854484	G5E8V9;E9Q3G5		Arfip1
29.6949	29.7303	29.8257	29.9777	29.5362	29.9355	29.9636	29.8405	0.991854	G5E911;E9Q0W5;G3X9I1;Q91VU0	Protein FAM3C	Fam3c
33.1467	33.1838	33.2452	33.2413	33.0721	33.2124	33.3834	33.1432	1.00102	G5E924;Q8R081;G3UY38	Heterogeneous nuclear ribonucleoprotein L	Hnrnpl
29.285	28.9839	29.0248	29.0782	29.0795	29.0592	28.986	29.0775	1.02984	H3BIX4;Z4YLB7;P97300-3;P97300-1;P97300	Neuroplastin	Nptn
NaN	NaN	NaN	NaN	NaN	25.6917	NaN	NaN	NaN	Q80XR2;Q8BMS7;H3BLI6;H3BL44;H3BIX7;Q3UZR5	Calcium-transporting ATPase type 2C member 1;Calcium-transporting ATPase	Atp2c1
29.5292	29.6239	29.8088	29.7681	29.4848	29.521	29.4268	29.5828	1.13182	Q6NVF9;H3BJ30;H3BJW3	Cleavage and polyadenylation specificity factor subunit 6	Cpsf6
NaN	NaN	NaN	NaN	NaN	NaN	NaN	23.9863	NaN	Q80YT7-2;H3BJ38		Pde4dip
30.7569	30.7122	30.8236	30.8316	30.7823	30.6409	30.6971	30.6992	1.05424	Q60875;H3BJU7;H3BJX8;H3BJ45;H3BJ40;H3BKH9;Q60875-5;Q60875-4;Q60875-3;Q60875-2	Rho guanine nucleotide exchange factor 2	Arhgef2
30.2408	30.1789	30.3117	30.4586	29.6064	29.6417	29.6982	29.5919	1.58332	H3BJ97;Q99JR5	Tubulointerstitial nephritis antigen-like	Tinagl1
NaN	NaN	NaN	NaN	NaN	NaN	NaN	23.038	NaN	Q811I0;H3BKR0;H3BLD0;H3BJP9;V9GX21;H3BLL2	ATP synthase mitochondrial F1 complex assembly factor 1	Atpaf1
27.3011	27.0239	27.3179	NaN	27.3551	27.2013	27.6247	27.1785	0.916623	P53564;H3BK24;H3BLS0;P53564-2;P53564-3;H3BKT0;E9QKE9;H3BJQ9;P70403;H3BJ26;H3BJN3;H3BKF6;P53564-4	Homeobox protein cut-like 1;Homeobox protein cut-like;One cut domain family member;Protein CASP	Cux1
NaN	NaN	NaN	NaN	NaN	NaN	NaN	24.7504	NaN	Q9JHJ3;H3BK59;H9H9R4	Lysosomal protein NCU-G1	0610031J06Rik
NaN	NaN	NaN	NaN	24.9909	NaN	NaN	NaN	NaN	H3BK73;P0C7W3;Q8R1J9	Prosalusin;Salusin-beta;Torsin-2A	Tor2a
34.0103	34.0207	34.0266	33.9716	34.0075	34.1422	33.8593	34.2008	0.969189	Q9R0P3;H3BKH6;H3BLJ9;H3BJL6;H3BJP2;H3BK43	S-formylglutathione hydrolase	Esd
NaN	NaN	NaN	NaN	27.009	NaN	NaN	NaN	NaN	Q8R554;H3BKW8;B2RUR8	OTU domain-containing protein 7A;OTU domain-containing protein 7B	Otud7a;Otud7b
NaN	NaN	NaN	NaN	NaN	NaN	24.0429	NaN	NaN	Q8C1M2;H3BL05;H3BLD9	Zinc finger protein 428	Znf428;Zfp428
27.4071	27.5667	27.5466	27.1538	27.3277	27.4911	27.1733	27.1169	1.1029	H3BL08;Q8C172	Ceramide synthase 6	Cers6
30.364	30.224	30.3946	30.5227	30.2937	30.2846	30.4883	30.3507	1.01537	O08784;H3BL37;Q05CS0;H3BIX0	Treacle protein	Tcof1
NaN	NaN	NaN	NaN	NaN	NaN	NaN	23.9498	NaN	Q8BL99;H7BWZ9;Q8BL99-5;Q8BL99-6	Protein dopey-1	Dopey1
NaN	NaN	NaN	NaN	NaN	NaN	NaN	23.5578	NaN	Q8C1B1;H7BX08;Q8C1B1-2	Calmodulin-regulated spectrin-associated protein 2	Camsap2
26.2109	26.0559	26.1431	25.9971	25.9662	25.8024	25.6288	25.85	1.22256	H7BX14;Q8BMZ5-2;Q8BMZ5;D3YZ84;D3YY06;D3YWG5;D6RH65	tRNA-splicing endonuclease subunit Sen34	Tsen34
NaN	NaN	NaN	NaN	NaN	NaN	NaN	27.85	NaN	Q6P902;H7BX21	Thioredoxin domain-containing protein 2	Txndc2
28.5615	28.8232	28.7165	28.7575	28.851	28.6393	28.9321	29.1385	0.88543	H7BX23;Q6W3F0;F6R2A2;Q6W3F0-3;Q6W3F0-2	Prolyl 4-hydroxylase subunit alpha-3	P4ha3
29.4254	29.4938	29.4802	29.624	29.3864	29.838	29.8126	29.6793	0.886858	Q6A065;H7BX26	Centrosomal protein of 170 kDa	Cep170
29.2366	28.8196	28.9845	28.9694	28.6587	28.9842	28.7293	28.6801	1.18054	H7BX38;P40224;P40224-1	Stromal cell-derived factor 1	Cxcl12
NaN	25.4482	NaN	NaN	25.8236	NaN	NaN	NaN	0.770892	P47934;H7BX88;F7BF80;B7ZDD7	Carnitine O-acetyltransferase	Crat
32.0601	32.0191	31.996	31.9434	31.8726	31.8997	31.8057	31.6075	1.15531	Q6PDM2;H7BX95;Q6PDM2-3;Q6PDM2-2	Serine/arginine-rich splicing factor 1	Srsf1
29.687	29.7114	29.7922	29.7677	29.7924	29.8611	29.7583	29.787	0.959181	O88738;S4R1L5;H9KUX8;S4R2P8;O88738-3;O88738-2	Baculoviral IAP repeat-containing protein 6	Birc6
29.3984	29.4051	29.346	29.4259	29.252	29.3058	29.4206	29.2551	1.06104	H9KV00;Q9QX47;Q9QX47-3;H9KV01;H9KV15;Q9QX47-4;Q9QX47-2	Protein SON	Son
NaN	NaN	NaN	NaN	NaN	NaN	NaN	25.8763	NaN	Q99JN2;H9KV05;Q99JN2-2	Kelch-like protein 22	Klhl22
27.7084	27.5429	27.5912	27.754	27.8386	27.5001	27.6195	27.8029	0.97188	Q9JI46;I1E4X7;H3BLR8;B2KF67	Diphosphoinositol polyphosphate phosphohydrolase 1	Nudt3
27.4807	27.5016	27.2617	27.2907	27.2615	27.7636	27.706	27.767	0.846247	Q9CR70;J3JS94	EKC/KEOPS complex subunit Lage3	Lage3
NaN	NaN	NaN	NaN	NaN	NaN	NaN	25.4821	NaN	J3KMG3		Mia3
NaN	NaN	NaN	NaN	NaN	25.6039	NaN	NaN	NaN	Q9CYI0;J3KMQ6;B1AQG3	Protein Njmu-R1	5730455P16Rik
28.8183	28.6418	28.6275	28.7331	28.5327	28.5699	28.9998	28.869	0.974224	Q99M28;J3QK23;Q99M28-2	RNA-binding protein with serine-rich domain 1	Rnps1;Gm9825
27.9861	28.4013	28.0628	27.9792	27.9074	27.7071	27.757	27.5453	1.29967	J3QK52;Q9WV70;Q8BHX6	Nucleolar complex protein 2 homolog	Noc2l
NaN	NaN	NaN	23.7211	NaN	NaN	NaN	NaN	NaN	Q80UU1;J3QM81	Ankyrin repeat and zinc finger domain-containing protein 1	Ankzf1
NaN	NaN	NaN	NaN	24.6571	NaN	NaN	NaN	NaN	J3QMK2		Bbip1
28.8946	28.6607	28.7792	28.6289	29.1092	28.6972	28.7922	28.5759	0.96408	Q9CZ42;J3QMM7;K3W4M4;Q9CZ42-3;J3QN06;Q9CZ42-2	ATP-dependent (S)-NAD(P)H-hydrate dehydratase	Carkd
27.2452	NaN	NaN	27.253	27.2488	27.063	27.0127	26.8686	1.14936	P28650;J3QN31;P28650-2	Adenylosuccinate synthetase isozyme 1	Adssl1
28.7929	28.8094	28.7584	28.923	28.8562	28.8467	28.7015	28.9813	0.98248	Q3TJ22;J3QN89		Aamp
26.8215	26.9392	26.8163	27.0054	26.8009	NaN	NaN	27.3278	0.889613	Q5I012;Q5I012-3;J3QNE8;Q5I012-4;Q5I012-2	Putative sodium-coupled neutral amino acid transporter 10	Slc38a10
NaN	NaN	NaN	NaN	24.3698	NaN	NaN	NaN	NaN	Q8BIH0;J3QNK5;Q8BIH0-2	Histone deacetylase complex subunit SAP130	Sap130
NaN	NaN	NaN	NaN	NaN	NaN	24.0875	NaN	NaN	J3QNT2;Q99PM3	Transcription initiation factor IIA subunit 1;Transcription initiation factor IIA alpha chain;Transcription initiation factor IIA beta chain	Gm5435;Gtf2a1
29.3295	28.9526	29.3083	29.3785	29.7928	29.7495	29.8178	29.6996	0.696068	Q9Z2A5;Q4FCQ7;J3QNU1;Q9Z2A5-2	Arginyl-tRNA--protein transferase 1	Ate1
26.3961	26.363	26.8708	26.5719	26.4514	26.5249	26.3303	26.7331	1.02849	Q3TIR1;J3QNW4;Q3TIR1-3;Q3TIR1-2	Trafficking protein particle complex subunit 13	Trappc13
31.2163	31.2031	31.2114	31.2695	31.1727	31.1027	31.4531	31.0072	1.02893	J3QNY1;Q8BG05-2;E9Q7H5;B2RXM2	Heterogeneous nuclear ribonucleoprotein A3	Gm9242;Hnrnpa3;Gm8991;Gm6793
26.3473	26.2902	26.317	NaN	26.2983	26.0869	26.0733	26.2546	1.10182	Q9CQL7;J3QP80	MORF4 family-associated protein 1	Mrfap1;Gm5814
25.2674	25.1932	NaN	NaN	NaN	25.4348	25.8202	25.2854	0.821785	Q6P4S8;K3W4P2	Integrator complex subunit 1	Ints1
NaN	NaN	NaN	NaN	NaN	NaN	NaN	25.0309	NaN	Q6PGA0;Q8CFE3;K3W4P9;Q6PGA0-2	REST corepressor 3;REST corepressor 1	Rcor3;Rcor1
28.4638	28.7377	28.7117	28.3286	28.4465	28.6749	27.8594	28.7975	1.08363	P18572;K3W4Q8;P18572-2;J3QP71	Basigin	Bsg
26.985	26.7618	26.8433	26.9564	26.8649	26.8032	27.0913	26.6402	1.02578	Q8BH60;K3W4Q9;Q8BH60-2	Golgi-associated PDZ and coiled-coil motif-containing protein	Gopc
31.6603	32.0806	31.789	31.7363	31.9705	31.8817	31.7757	31.7562	0.979777	Q6URW6;K3W4R2;Q6URW6-2;Q6URW6-3	Myosin-14	Myh14
30.7795	30.7151	30.79	30.7322	30.6652	30.6406	30.6818	30.7188	1.05526	K3W4R5;A2AGT5;Z4YL78;A2AGT5-3;A2AGT5-2	Cytoskeleton-associated protein 5	Ckap5
29.2575	28.7174	28.9306	29.1247	29.2642	29.1507	29.2965	29.2028	0.857971	Q9R062;K3W4S6;V9GX26	Glycogenin-1	Gyg1;Gyg
28.9138	29.1785	28.8802	28.9482	29.2677	29.0274	29.2012	29.2169	0.871683	Q9Z1G4;K3W4T3;Q9Z1G4-3;Q9Z1G4-2	V-type proton ATPase 116 kDa subunit a isoform 1	Atp6v0a1
NaN	NaN	NaN	NaN	NaN	NaN	NaN	22.7062	NaN	Q6ZQK0;Q80W41;K4DI67	Condensin-2 complex subunit D3	Ncapd3
NaN	NaN	NaN	NaN	NaN	23.71	NaN	NaN	NaN	Q5ND34;K4DI77;Q5ND34-3;Q5ND34-2;F6XD87	WD repeat-containing protein 81	Wdr81
27.6962	27.8801	27.6806	27.711	28.5004	28.7237	28.3747	28.3352	0.598107	Q80SU7;L7N451	Interferon-induced very large GTPase 1	Gvin1
NaN	NaN	NaN	NaN	NaN	NaN	NaN	27.4436	NaN	Q9CQV6;M0QWC2	Microtubule-associated proteins 1A/1B light chain 3B	Map1lc3b
30.6881	30.7474	30.674	30.704	30.7302	30.8011	30.9769	30.7239	0.930031	O08528;E9Q5B5	Hexokinase-2	Hk2
33.2331	33.2771	33.2851	33.3509	33.3371	33.401	33.4896	33.4774	0.907692	O08529	Calpain-2 catalytic subunit	Capn2
27.6129	27.6863	27.1052	27.401	27.49	26.8888	26.6491	27.0372	1.35198	O08532;O08532-3;O08532-2;E9Q1X8;O08532-4;O08532-5	Voltage-dependent calcium channel subunit alpha-2/delta-1;Voltage-dependent calcium channel subunit alpha-2-1;Voltage-dependent calcium channel subunit delta-1	Cacna2d1
30.6546	30.6395	30.645	30.5979	30.8293	31.0095	30.8625	30.8625	0.837	O08539;O08539-2;Q6P1B9	Myc box-dependent-interacting protein 1	Bin1
31.3434	31.2471	31.2367	31.2976	31.3372	31.3514	31.209	31.4468	0.962661	O08547;E9Q6R3	Vesicle-trafficking protein SEC22b	Sec22b
33.5437	33.4801	33.5063	33.5307	33.4057	33.5237	33.5654	33.4314	1.0236	O08553	Dihydropyrimidinase-related protein 2	Dpysl2
29.904	29.9993	29.9825	30.0436	30.0346	30.1253	30.2119	30.0621	0.916289	O08579;I7HJS1;Q3THM8;B7FAU5	Emerin	Emd
28.1561	28.0175	27.922	28.076	27.9439	27.7709	28.1419	28.0801	1.04153	O08582	GTP-binding protein 1	Gtpbp1
30.7049	30.8401	30.8531	30.6878	30.7928	31.2888	31.3992	30.8891	0.800515	O08583;O08583-2;Q9JJW6;G3X9I4;Q9JJW6-2	THO complex subunit 4;Aly/REF export factor 2	Alyref;Alyref2
NaN	NaN	NaN	NaN	NaN	NaN	NaN	26.5052	NaN	O08586	Phosphatidylinositol 3,4,5-trisphosphate 3-phosphatase and dual-specificity protein phosphatase PTEN	Pten
29.234	29.3001	29.2851	29.3535	29.5639	29.6671	29.7258	29.6191	0.784149	O08599;O08599-2;Z4YL99	Syntaxin-binding protein 1	Stxbp1
NaN	NaN	NaN	NaN	NaN	NaN	NaN	26.6353	NaN	O08600	Endonuclease G, mitochondrial	Endog
NaN	NaN	NaN	NaN	NaN	NaN	28.036	NaN	NaN	O08638;O08638-2	Myosin-11	Myh11
29.4768	29.3693	29.4428	29.4807	28.9859	28.9368	29.206	28.8662	1.36006	O08663;Q3TMN1;Q3UI33	Methionine aminopeptidase 2	Metap2
27.4617	27.631	27.5249	27.5443	27.5319	27.3298	27.332	27.2623	1.13012	O08738	Caspase-6;Caspase-6 subunit p18;Caspase-6 subunit p11	Casp6
NaN	NaN	NaN	25.7307	NaN	NaN	NaN	NaN	NaN	O08739	AMP deaminase 3	Ampd3
31.9755	32.1778	32.1604	32.0833	32.1186	31.941	31.9364	32.0067	1.07072	O08749	Dihydrolipoyl dehydrogenase, mitochondrial	Dld
32.8829	32.898	32.911	32.8642	32.824	32.7383	32.8101	32.9752	1.03679	O08795-2;O08795	Glucosidase 2 subunit beta	Prkcsh
NaN	NaN	24.8018	NaN	NaN	NaN	NaN	NaN	NaN	O08796;Q3UWZ1	Eukaryotic elongation factor 2 kinase	Eef2k
29.3842	29.4406	29.4303	29.4654	28.9074	28.6352	28.8308	28.7722	1.56236	O08797		Serpinb9
NaN	NaN	NaN	NaN	NaN	NaN	24.3528	NaN	NaN	O08800	Serpin B8	Serpinb8
26.9431	27.6162	27.2046	27.6476	24.9204	NaN	25.4696	24.8049	4.88348	O08804;F7B9A0		Serpinb6b
32.1547	32.3322	32.2289	32.1325	32.1929	32.1815	32.2029	32.0761	1.03435	O08807;B1AZS9	Peroxiredoxin-4	Prdx4
27.6794	28.0348	27.9509	28.1134	27.6856	27.8034	27.7928	28.0333	1.08361	O08848	60 kDa SS-A/Ro ribonucleoprotein	Trove2
26.611	26.9101	26.5576	26.6561	26.6378	26.6947	26.8021	26.6738	0.987327	O08912	Polypeptide N-acetylgalactosaminyltransferase 1;Polypeptide N-acetylgalactosaminyltransferase 1 soluble form	Galnt1
29.0604	29.1716	29.1275	29.1813	29.3395	29.2689	29.3479	29.1977	0.899191	O08915;D3YW40	AH receptor-interacting protein	Aip
29.9686	29.911	29.9647	29.8984	30.0423	29.9207	30.0901	30.0197	0.944403	O08917;G3UYU4	Flotillin-1	Flot1
NaN	NaN	NaN	NaN	NaN	26.9179	27.2647	NaN	NaN	O08919	Numb-like protein	Numbl
NaN	28.2367	28.0648	27.8388	28.4041	28.4445	28.2396	28.036	0.850107	O08992;Q3TMX0;H3BLG5;A2AKJ9;A2AKJ6	Syntenin-1	Sdcbp
31.8746	31.856	31.7906	31.8157	31.7812	31.1446	31.2291	31.6015	1.31506	O08997	Copper transport protein ATOX1	Atox1
28.3729	27.9781	28.3705	28.219	28.4462	28.2042	28.4332	28.2291	0.937539	O09005	Sphingolipid delta(4)-desaturase DES1	Degs1
27.7128	27.9059	27.7524	27.8247	28.0698	28.1935	28.2444	28.0793	0.785781	O09012-2;O09012;D3Z600	Peroxisomal targeting signal 1 receptor	Pex5
29.7306	29.6265	29.7348	29.7908	29.8225	29.6303	29.6767	29.4031	1.06255	O09044;Q9D3L3;B0R030;B0R029;E9Q8A1	Synaptosomal-associated protein 23;Synaptosomal-associated protein	Snap23
31.9324	32.0442	32.0848	31.944	31.9926	32.2078	32.1427	32.1734	0.915242	O09061	Proteasome subunit beta type-1	Psmb1
29.5717	29.6831	29.5105	29.7183	29.362	29.5141	29.4199	29.2181	1.18294	O09110;O09110-2	Dual specificity mitogen-activated protein kinase kinase 3	Map2k3
NaN	NaN	NaN	NaN	NaN	NaN	NaN	28.6701	NaN	O09111	NADH dehydrogenase [ubiquinone] 1 beta subcomplex subunit 11, mitochondrial	Ndufb11
29.1756	29.1159	29.1797	29.263	29.1793	29.3859	28.8782	29.3635	0.987481	O09117-2;D6RFU9;O09117	Synaptophysin-like protein 1	Sypl1;Sypl
33.4199	33.47	33.4715	33.4876	33.6494	33.896	33.8819	33.8392	0.782208	O09131	Glutathione S-transferase omega-1	Gsto1
29.1446	29.0069	29.1586	29.2509	29.2936	28.8734	29.1504	28.7996	1.07998	O09159	Lysosomal alpha-mannosidase	Man2b1
NaN	NaN	NaN	NaN	23.8484	NaN	NaN	NaN	NaN	O09164	Extracellular superoxide dismutase [Cu-Zn]	Sod3
30.0413	30.3719	30.3576	30.7113	30.5769	30.9384	31.1159	30.9186	0.69886	O09172;H3BJA3;F6VNW5	Glutamate--cysteine ligase regulatory subunit	Gclm
NaN	NaN	NaN	NaN	NaN	NaN	NaN	25.5492	NaN	O09174	Alpha-methylacyl-CoA racemase	Amacr
30.6057	30.4785	30.6394	30.5345	30.6402	30.633	30.6777	30.6237	0.946632	O35074;Q8BXC0	Prostacyclin synthase	Ptgis
27.8972	27.8978	27.9396	27.7738	27.871	27.7565	27.8942	28.051	0.98892	O35075	Down syndrome critical region protein 3 homolog	Dscr3
26.5988	26.4599	26.5699	26.4914	26.8474	26.7189	26.8029	26.7659	0.838699	O35083;G3UWV6	1-acyl-sn-glycerol-3-phosphate acyltransferase alpha	Agpat1
NaN	NaN	NaN	NaN	NaN	NaN	NaN	26.9742	NaN	O35098;Q3TMU8;O35098-2	Dihydropyrimidinase-related protein 4	Dpysl4
28.2135	28.1834	28.3644	28.3592	28.326	28.571	28.4178	28.2957	0.918594	O35114	Lysosome membrane protein 2	Scarb2
28.3268	28.0226	28.2192	28.0726	28.0377	28.1198	28.1983	28.2387	1.00813	O35127	Protein C10	Grcc10
32.7192	32.6445	32.5942	32.6261	32.6303	32.5884	32.5063	32.5214	1.06025	O35129;F6QPR1	Prohibitin-2	Phb2
26.3648	26.7165	26.6019	26.4613	26.4594	26.2708	26.2762	26.6787	1.08286	O35130	Ribosomal RNA small subunit methyltransferase NEP1	Emg1
28.7532	28.4848	NaN	27.1125	NaN	NaN	29.6324	NaN	0.349759	O35134	DNA-directed RNA polymerase I subunit RPA1	Polr1a
29.7041	29.7864	29.6376	29.7592	29.6719	29.7668	29.8878	29.781	0.962561	O35215;G3UYJ7;G3UZN1	D-dopachrome decarboxylase	Ddt;Gm20441
26.5774	25.427	26.3364	26.2314	25.4974	26.5922	27.2227	26.1071	0.863459	O35218	Cleavage and polyadenylation specificity factor subunit 2	Cpsf2
31.1181	31.1625	31.1672	31.2648	31.2404	31.2528	31.2874	31.1753	0.958716	O35226;O35226-4	26S proteasome non-ATPase regulatory subunit 4	Psmd4
NaN	NaN	NaN	NaN	NaN	NaN	NaN	25.551	NaN	O35226-2;O35226-3;O35226-5	26S proteasome non-ATPase regulatory subunit 4	Psmd4
27.0756	26.9964	27.2365	27.1939	27.299	27.2401	27.4455	NaN	0.868983	O35239	Tyrosine-protein phosphatase non-receptor type 9	Ptpn9
NaN	NaN	NaN	NaN	26.638	26.3163	NaN	26.3401	NaN	O35245;O35245-5;O35245-3;O35245-2;O35245-4	Polycystin-2	Pkd2
32.0045	31.8551	31.9258	31.8771	31.7593	31.8547	32.0487	31.7828	1.03832	O35286	Putative pre-mRNA-splicing factor ATP-dependent RNA helicase DHX15	Dhx15
29.5408	29.7548	29.5633	29.4617	29.6377	29.7363	29.781	29.7422	0.904912	O35295	Transcriptional activator protein Pur-beta	Purb
29.0355	29.1806	29.1751	29.0031	28.6793	28.9893	29.0463	28.6768	1.18974	O35316	Sodium- and chloride-dependent taurine transporter	Slc6a6
28.4901	28.6244	28.5465	28.3888	28.3787	28.6262	28.9205	28.6829	0.907755	O35326;Q9D8S5	Serine/arginine-rich splicing factor 5	Srsf5
30.078	30.1141	30.2003	30.1208	29.9969	30.0504	30.5345	29.9638	0.994401	O35343	Importin subunit alpha-3	Kpna4
31.1323	31.3491	31.2779	31.2252	31.2235	31.4782	31.4411	31.1619	0.946025	O35344	Importin subunit alpha-4	Kpna3
29.5182	29.5057	29.4904	29.5718	29.3956	29.7072	29.8195	29.4618	0.949671	O35345;Q4FJZ2	Importin subunit alpha-7;Importin subunit alpha	Kpna6
30.9618	30.9304	30.9395	30.9036	30.9161	30.8144	30.7747	30.8775	1.06301	O35350	Calpain-1 catalytic subunit	Capn1
NaN	25.5237	25.8136	25.5625	26.0402	26.4614	25.794	26.5117	0.67429	O35375;O35375-5;O35375-6;O35375-2;O35375-3;O35375-4	Neuropilin-2	Nrp2
30.5677	30.6002	30.5649	30.5316	30.6368	30.6097	30.4909	30.4165	1.01933	O35379	Multidrug resistance-associated protein 1	Abcc1
32.3049	32.3237	32.3259	32.4902	32.3796	32.1717	32.4227	32.3	1.03002	O35381;D3Z7M9;D3YYE1;F6UFG6	Acidic leucine-rich nuclear phosphoprotein 32 family member A	Anp32a
29.6454	29.7605	29.8101	29.7009	29.6848	29.7823	29.6031	29.7843	1.01087	O35382;Q8C391	Exocyst complex component 4	Exoc4
23.7894	23.5122	24.0541	23.9678	23.7562	24.1469	24.0911	23.4481	0.979624	O35387	HCLS1-associated protein X-1	Hax1
28.646	28.3764	28.5962	28.5825	28.9309	28.6619	28.3476	28.7336	0.92132	O35405	Phospholipase D3	Pld3
28.1449	28.0729	27.9325	27.8876	28.046	27.9955	28.007	27.6978	1.05183	O35459;F7B227	Delta(3,5)-Delta(2,4)-dienoyl-CoA isomerase, mitochondrial	Ech1
28.7728	28.7267	28.8308	28.8564	28.8323	28.6545	28.6844	28.8007	1.03792	O35465;O35465-2	Peptidyl-prolyl cis-trans isomerase FKBP8	Fkbp8
NaN	NaN	NaN	NaN	27.9972	28.2332	28.1465	28.0547	NaN	Q8C8K0;Q8C4U8;O35474	EGF-like repeat and discoidin I-like domain-containing protein 3	Edil3
NaN	NaN	NaN	NaN	NaN	NaN	NaN	25.2276	NaN	O35492	Dual specificity protein kinase CLK3	Clk3
29.675	29.4508	29.7125	29.5944	29.3745	29.4608	29.8917	29.4747	1.04084	O35551;O35551-2;O35551-3;O35551-5;J3QJV7;O35551-6	Rab GTPase-binding effector protein 1	Rabep1
27.4932	27.6221	28.0155	27.7744	27.3684	NaN	28.1245	NaN	0.98613	O35566	CD151 antigen	Cd151
31.2406	31.3716	31.3494	31.2708	31.4204	31.5378	31.5275	31.5122	0.875771	O35593	26S proteasome non-ATPase regulatory subunit 14	Psmd14
NaN	NaN	NaN	NaN	NaN	NaN	NaN	26.4071	NaN	O35601;O35601-2	FYN-binding protein	Fyb
26.9229	27.1891	26.9859	27.1522	27.1865	27.0773	26.9662	26.7041	1.05629	O35604	Niemann-Pick C1 protein	Npc1
NaN	NaN	NaN	NaN	NaN	NaN	NaN	23.7631	NaN	O35621;Q91W01	Phosphomannomutase 1;Phosphomannomutase	Pmm1
NaN	27.4796	NaN	27.8407	NaN	27.2316	27.3425	NaN	1.29513	O35623	BET1 homolog	Bet1
33.8339	33.8543	33.8001	33.8755	33.7926	33.7801	33.8137	33.8078	1.02983	O35639	Annexin A3	Anxa3
28.0739	28.1228	28.0477	28.2513	28.4837	28.3825	28.3092	28.1478	0.866412	O35640;Q921D0	Annexin A8;Annexin	Anxa8
30.7017	30.7421	30.7832	30.7208	30.8632	30.6097	30.7544	30.676	1.00774	O35643;Q5SVG5;Q5SVG4	AP-1 complex subunit beta-1	Ap1b1
31.3045	31.2215	31.3037	31.4554	31.0909	31.1375	31.2059	31.2347	1.11267	O35682	Myeloid-associated differentiation marker	Myadm
NaN	NaN	NaN	NaN	NaN	NaN	NaN	25.9497	NaN	O35683	NADH dehydrogenase [ubiquinone] 1 alpha subcomplex subunit 1	Ndufa1
31.7313	31.887	31.8358	31.8976	31.8568	31.4266	31.5706	31.5337	1.18181	O35685	Nuclear migration protein nudC	Nudc
30.0875	30.0034	30.1946	29.9862	29.9679	29.9411	30.0532	30.0367	1.04841	O35691;Q3TUQ5	Pinin	Pnn
27.9886	27.6087	27.428	27.6283	27.8468	27.7683	27.9009	27.8368	0.88589	O35704	Serine palmitoyltransferase 1	Sptlc1
33.0107	32.9697	33.0025	33.0046	32.9344	32.9895	33.0805	33.0335	0.991304	O35737;Q8C2Q7	Heterogeneous nuclear ribonucleoprotein H;Heterogeneous nuclear ribonucleoprotein H, N-terminally processed	Hnrnph1
30.4909	30.3898	30.4178	30.4056	30.3551	30.6013	30.4172	30.518	0.968031	O35841	Apoptosis inhibitor 5	Api5
28.5481	28.3401	28.7774	28.6198	28.6817	28.4406	28.2915	28.727	1.02537	O35855;O88374;D3Z7C8	Branched-chain-amino-acid aminotransferase, mitochondrial;Branched-chain-amino-acid aminotransferase	Bcat2
29.3492	29.4889	29.2159	29.3279	29.3734	29.3349	29.3763	29.1216	1.03091	O35857	Mitochondrial import inner membrane translocase subunit TIM44	Timm44
29.5229	29.5292	29.5576	29.6046	29.7074	29.6876	29.8941	29.7222	0.871003	O35864	COP9 signalosome complex subunit 5	Cops5
NaN	NaN	NaN	NaN	NaN	NaN	25.7533	25.7119	NaN	O35874;Q5SSP3	Neutral amino acid transporter A	Slc1a4
31.2137	31.0953	30.9999	31.0639	31.5405	30.7353	32.2071	30.7865	0.856099	O35887;G3V004;G3UWV3	Calumenin	Calu
28.6797	28.7348	28.6921	28.7547	28.3983	28.6136	28.9372	28.5399	1.06664	O35900;O35901	U6 snRNA-associated Sm-like protein LSm2	Lsm2
NaN	NaN	NaN	NaN	25.4368	NaN	NaN	NaN	NaN	O35955	Proteasome subunit beta type-10	Psmb10
NaN	NaN	NaN	NaN	NaN	NaN	24.6568	NaN	NaN	O35963	Ras-related protein Rab-33B	Rab33b
27.7153	28.0428	27.8669	28.0053	27.7171	27.6625	27.2081	27.5993	1.28416	O35969;O35969-2	Guanidinoacetate N-methyltransferase	Gamt
26.7783	26.7804	26.6447	26.7945	26.5235	27.227	27.0178	NaN	0.886817	O35988	Syndecan-4	Sdc4
27.6395	27.9844	28.0741	27.7433	27.6169	27.8957	27.7759	27.6103	1.09857	O54692	Centromere/kinetochore protein zw10 homolog	Zw10
33.9488	33.8331	33.9623	33.9425	33.7242	33.7344	33.5803	33.7402	1.17032	O54724	Polymerase I and transcript release factor	Ptrf
32.9406	32.9165	32.8793	32.9626	32.866	33.0543	33.0393	32.9999	0.955862	O54734	Dolichyl-diphosphooligosaccharide--protein glycosyltransferase 48 kDa subunit	Ddost
30.9825	30.9526	30.9573	30.9604	31.0058	31.0716	31.3312	31.119	0.889644	O54774	AP-3 complex subunit delta-1	Ap3d1
NaN	NaN	NaN	25.0044	NaN	NaN	24.8004	25.9119	0.783633	O54781	SRSF protein kinase 2;SRSF protein kinase 2 N-terminal;SRSF protein kinase 2 C-terminal	Srpk2
29.7423	29.6896	29.6817	29.7138	29.7836	29.6208	29.5737	29.738	1.01947	O54782	Epididymis-specific alpha-mannosidase	Man2b2
28.8777	29.0529	28.9911	28.948	29.0615	28.8748	28.7428	29.1123	1.01366	O54784	Death-associated protein kinase 3	Dapk3
27.47	27.5716	27.4241	27.3319	27.7369	27.2922	27.6266	27.5931	0.924791	O54825	Bystin	Bysl
28.8128	28.8047	28.6205	28.8677	28.9261	29.1294	29.1278	29.1049	0.814719	O54833	Casein kinase II subunit alpha	Csnk2a2
26.6068	NaN	26.5362	26.5051	NaN	NaN	NaN	NaN	NaN	O54890	Integrin beta-3	Itgb3
NaN	NaN	NaN	NaN	NaN	NaN	NaN	27.4332	NaN	O54931-3	A-kinase anchor protein 2	Akap2
28.4913	28.6402	28.7641	28.5799	28.4237	28.052	28.8159	28.4116	1.1432	O54941	SWI/SNF-related matrix-associated actin-dependent regulator of chromatin subfamily E member 1	Smarce1
27.9666	27.8545	27.8751	27.6161	27.7786	27.5573	27.8697	27.306	1.14884	O54946;O54946-2;G3X8S5;Q9QYI8	DnaJ homolog subfamily B member 6;DnaJ homolog subfamily B member 7	Dnajb6;Dnajb7
29.0449	29.1682	29.0449	29.1562	29.1803	29.3153	29.2279	29.1721	0.919964	O54950	5-AMP-activated protein kinase subunit gamma-1	Prkag1
30.8015	30.8217	30.6924	30.8858	30.7856	30.8389	30.8403	30.7023	1.00596	O54962	Barrier-to-autointegration factor;Barrier-to-autointegration factor, N-terminally processed	Banf1
29.7922	29.6422	29.7281	29.7869	29.7303	29.7899	29.9287	29.8716	0.937717	O54984	ATPase Asna1	Asna1
29.3666	29.6499	29.7089	29.6413	29.4084	29.662	29.6839	29.6642	0.991064	O54988-2;O54988	STE20-like serine/threonine-protein kinase	Slk
30.489	30.6125	30.6398	30.5813	30.4757	30.5697	30.8975	30.3142	1.01141	O54998;H3BJI5	Peptidyl-prolyl cis-trans isomerase FKBP7;Peptidyl-prolyl cis-trans isomerase	Fkbp7
28.9564	29.0907	28.9718	29.0091	29.0297	29.0143	29.1856	29.1309	0.944011	O55013	Trafficking protein particle complex subunit 3	Trappc3
31.5111	31.2826	31.2285	31.3409	31.5032	31.1988	31.4604	31.222	0.996316	O55022	Membrane-associated progesterone receptor component 1	Pgrmc1
24.5274	24.583	24.9476	25.2044	24.6112	25.1774	24.7674	24.7762	0.987977	O55028;D3Z7R0	[3-methyl-2-oxobutanoate dehydrogenase [lipoamide]] kinase, mitochondrial	Bckdk
33.0473	33.1325	33.1783	33.1527	33.1021	33.1445	33.1237	33.1131	1.00476	O55029	Coatomer subunit beta	Copb2
26.164	NaN	NaN	NaN	NaN	26.3034	26.5276	26.4142	0.840275	O55057;M0QWG6	Retinal rod rhodopsin-sensitive cGMP 3,5-cyclic phosphodiesterase subunit delta	Pde6d
25.0571	NaN	NaN	NaN	NaN	NaN	24.8769	NaN	1.13304	O55060;D3Z217;D3YWK6;D3Z380	Thiopurine S-methyltransferase	Tpmt
30.0802	29.7978	29.7998	29.9365	30.0898	29.979	30.2065	30.1557	0.868035	O55091	Protein IMPACT	Impact
26.0459	26.007	26.0626	25.9868	26.2135	26.5045	26.3988	26.1135	0.82245	O55098	Serine/threonine-protein kinase 10	Stk10
28.5894	28.6582	28.64	28.6094	28.9108	28.368	28.616	28.8406	0.95953	O55106;F8WH41	Striatin	Strn
27.2806	27.2972	27.4309	27.1066	26.937	27.0957	26.6295	27.0161	1.28276	O55125;Q5SVG6	Protein NipSnap homolog 1	Nipsnap1
28.9768	29.0844	29.0853	29.0205	29.3264	29.2998	29.1889	29.5957	0.806111	O55126;Q7TMG8	Protein NipSnap homolog 2	Gbas
NaN	NaN	NaN	NaN	NaN	NaN	NaN	25.6207	NaN	O55131	Septin-7	2015-09-07
31.008	30.6748	30.8036	30.9389	30.62	30.8084	30.6256	30.7151	1.12043	O55135	Eukaryotic translation initiation factor 6	Eif6
33.2177	33.0959	33.1919	33.2847	33.0639	33.1949	33.1354	33.091	1.05427	O55142	60S ribosomal protein L35a	Rpl35a
32.9251	32.9528	32.9421	32.9543	33.0412	33.0137	33.0075	33.0202	0.947978	O55143;J3KMM5;O55143-2	Sarcoplasmic/endoplasmic reticulum calcium ATPase 2;Calcium-transporting ATPase	Atp2a2
30.0264	30.0473	30.0237	30.0343	29.6323	29.7235	29.996	29.8484	1.17517	O55201;O55201-2	Transcription elongation factor SPT5	Supt5h
32.6016	32.593	32.5482	32.6403	32.8278	32.8779	32.8662	32.82	0.839615	O55222	Integrin-linked protein kinase	Ilk
26.1724	NaN	26.0399	NaN	NaN	NaN	NaN	NaN	NaN	O55229;F6RRT7	Choline/ethanolamine kinase	Chkb
32.2654	32.1693	32.1882	32.1672	32.2266	32.2835	32.4255	32.3122	0.92375	O55234	Proteasome subunit beta type-5	Psmb5
NaN	NaN	NaN	NaN	NaN	NaN	24.0543	NaN	NaN	O55239	Nicotinamide N-methyltransferase	Nnmt
NaN	25.3462	25.6092	NaN	25.4686	25.9575	25.8396	25.615	0.845294	O55242;O55242-2	Sigma non-opioid intracellular receptor 1	Sigmar1
28.7349	28.4859	28.2448	28.4469	28.8009	28.6316	29.2465	28.7954	0.762878	O70145	Neutrophil cytosol factor 2	Ncf2
28.2215	28.1229	28.1668	28.0604	27.7351	28.1758	28.0132	28.0646	1.10629	O70152;A2BDX2	Dolichol-phosphate mannosyltransferase subunit 1	Dpm1
25.9714	NaN	26.0637	NaN	NaN	26.2679	25.9663	25.9464	0.97087	O70172;F6RJE8	Phosphatidylinositol 5-phosphate 4-kinase type-2 alpha	Pip4k2a
31.5395	31.6508	31.4982	31.5544	31.5631	31.4985	31.5738	31.4779	1.02271	O70194	Eukaryotic translation initiation factor 3 subunit D	Eif3d
NaN	NaN	NaN	NaN	NaN	NaN	26.4364	NaN	NaN	O70200;G3UYJ2	Allograft inflammatory factor 1	Aif1
33.5406	33.4214	33.4467	33.4993	33.6486	33.5575	33.5906	33.5224	0.93124	O70251	Elongation factor 1-beta	Eef1b
28.086	28.0722	28.0561	27.9611	27.6974	28.0472	27.9688	28.0601	1.07213	O70274	Protein tyrosine phosphatase type IVA 2	Ptp4a2
NaN	NaN	NaN	NaN	NaN	NaN	NaN	NaN	NaN	O70293;O70293-2;Q9EP84	G protein-coupled receptor kinase 6	Grk6
30.8999	30.8782	30.9595	30.9767	31.0614	31.0725	31.2067	31.0108	0.895475	O70310	Glycylpeptide N-tetradecanoyltransferase 1	Nmt1
32.1147	32.1755	32.1158	32.1625	32.4374	32.4086	32.6362	32.4223	0.793334	O70318	Band 4.1-like protein 2	Epb41l2
30.1407	30.2284	30.1765	30.1879	29.9314	29.7104	29.9151	29.8934	1.24902	O70325;Q76LV0;O70325-2;Q91XR9;S4R1E5	Phospholipid hydroperoxide glutathione peroxidase, mitochondrial;Glutathione peroxidase;Phospholipid hydroperoxide glutathione peroxidase, nuclear	Gpx4
27.8278	28.056	27.9101	27.8434	NaN	27.1085	NaN	26.4543	2.18544	O70326	Gremlin-1	Grem1
28.9742	28.738	28.7655	28.8723	28.8588	28.7492	28.7213	28.7737	1.04373	O70378;M0QWY0;M0QWP2	ER membrane protein complex subunit 8	Emc8
32.8674	33.0363	32.9211	33.0449	33.0661	32.9628	32.8861	33.1206	0.971661	O70400;S4R1V0	PDZ and LIM domain protein 1	Pdlim1
29.0891	29.2148	29.3559	29.2887	29.3519	29.1288	29.0492	29.2145	1.036	O70404	Vesicle-associated membrane protein 8	Vamp8
NaN	NaN	NaN	NaN	NaN	24.2337	NaN	NaN	NaN	O70421	Frizzled-1	Fzd1
31.5459	31.493	31.4449	31.4543	30.7369	31.6028	30.6317	31.5003	1.28931	O70433	Four and a half LIM domains protein 2	Fhl2
32.7619	32.509	32.6718	32.7215	32.6832	32.5432	32.5839	32.6402	1.03773	O70435;E0CX62	Proteasome subunit alpha type-3	Psma3
28.6856	28.7509	28.8648	28.9416	28.7011	28.4394	28.3289	28.4747	1.2524	O70439;Q8BH40	Syntaxin-7	Stx7
32.451	32.5625	32.4604	32.5385	31.6711	31.9328	32.014	32.0067	1.51252	O70456	14-3-3 protein sigma	Sfn
NaN	NaN	NaN	22.486	NaN	NaN	NaN	NaN	NaN	O70472	Transmembrane protein 131	Tmem131
31.7274	31.6734	31.7049	31.7197	31.8327	31.9374	31.8584	31.8711	0.889736	O70475;D3Z3F7	UDP-glucose 6-dehydrogenase	Ugdh
NaN	NaN	25.2	NaN	NaN	NaN	NaN	25.3415	0.906576	O70481	E3 ubiquitin-protein ligase UBR1	Ubr1
30.9001	30.6422	30.7587	30.74	30.7346	30.8609	30.7411	31.1471	0.926155	O70492;Q78ZM0;D3Z789;D3Z6Z0	Sorting nexin-3	Snx3
NaN	NaN	NaN	NaN	NaN	NaN	NaN	24.6968	NaN	O70494;O70494-3;O70494-2	Transcription factor Sp3	Sp3
31.9646	31.7524	31.8131	31.8493	31.969	32.0446	32.2309	32.0756	0.849582	O70503;O70503-2	Estradiol 17-beta-dehydrogenase 12	Hsd17b12
27.9372	27.9705	27.9531	27.8723	27.7637	28.1322	28.0579	28.2955	0.914433	O70551	SRSF protein kinase 1	Srpk1
26.9657	27.0239	26.9671	26.9425	26.9091	26.4187	26.3352	26.6718	1.31139	O70572	Sphingomyelin phosphodiesterase 2	Smpd2
25.2838	25.56	25.0984	25.5783	25.4512	26.4171	26.2439	26.1538	0.621413	O70579	Peroxisomal membrane protein PMP34	Slc25a17
27.1522	27.2407	NaN	NaN	27.3072	27.2959	27.3486	26.114	1.1329	O70589;O70589-3;O70589-4;O70589-5;O70589-2	Peripheral plasma membrane protein CASK	Cask
29.3642	29.6434	29.3725	29.4209	29.7144	30.1618	29.9473	29.8138	0.727453	O70591;F8WJ30	Prefoldin subunit 2	Pfdn2
33.0181	33.0248	33.0427	33.0342	32.8931	32.8573	32.8547	32.8339	1.12521	O88207	Collagen alpha-1(V) chain	Col5a1
28.7104	28.4885	28.7413	28.8881	28.1492	28.0998	28.2335	28.3312	1.4178	O88271	Craniofacial development protein 1	Cfdp1
27.1161	26.9944	27.3192	27.1502	NaN	27.0146	NaN	27.0086	1.09686	O88291	DBIRD complex subunit ZNF326	Znf326
28.5337	28.5836	28.4983	28.4488	28.0922	27.9553	28.2752	28.4956	1.24102	O88322	Nidogen-2	Nid2
27.8365	27.8778	27.8942	27.8206	28.3886	28.3183	28.3166	28.034	0.754138	O88325		Naglu
34.7277	34.806	34.8126	34.7805	34.9792	35.0836	34.9973	34.9735	0.854587	O88342	WD repeat-containing protein 1	Wdr1
26.5185	26.2621	26.6521	25.996	26.1852	26.3996	26.0229	25.7341	1.20725	O88351;Q5D0E0;Q3U141	Inhibitor of nuclear factor kappa-B kinase subunit beta	Ikbkb
28.4199	29.0648	28.7066	28.4653	28.9135	28.6969	28.7769	29.375	0.825634	O88384;Q91XH6	Vesicle transport through interaction with t-SNAREs homolog 1B	Vti1b
27.3564	27.1506	27.3188	27.2547	26.7756	26.7844	27.0069	26.8794	1.32735	O88413	Tubby-related protein 3	Tulp3
28.3085	28.1717	28.2629	28.415	27.8713	28.0001	28.0045	28.0146	1.24565	O88428	Bifunctional 3-phosphoadenosine 5-phosphosulfate synthase 2;Sulfate adenylyltransferase;Adenylyl-sulfate kinase	Papss2
31.9547	32.0248	31.8289	31.981	31.9659	32.1504	32.3555	32.2552	0.850038	O88441	Metaxin-2	Mtx2
30.695	30.5894	30.5559	30.6855	30.6129	30.5604	30.5597	30.7191	1.01285	O88477	Insulin-like growth factor 2 mRNA-binding protein 1	Igf2bp1
31.5649	31.5831	31.5673	31.5591	31.6468	31.6093	31.5931	31.6183	0.967092	O88487;Q3TPJ8;A2BFF8;A2BFF9;A2BFF5	Cytoplasmic dynein 1 intermediate chain 2	Dync1i2
26.4375	26.9484	26.9214	26.6745	26.4104	26.9008	26.5899	NaN	1.08054	O88520	Leucine-rich repeat protein SHOC-2	Shoc2
28.4432	28.3819	28.5423	28.2764	28.4906	29.236	29.2605	28.7882	0.691176	O88531;B1B0P8;B1B0P9	Palmitoyl-protein thioesterase 1	Ppt1
28.5514	28.5515	28.6371	28.6898	28.4544	28.7001	28.8179	28.8451	0.935024	O88532	Zinc finger RNA-binding protein	Zfr
30.2555	30.3107	30.382	30.3178	30.3066	30.4991	30.4408	30.6153	0.901907	O88543	COP9 signalosome complex subunit 3	Cops3
31.0007	31.0989	31.0447	31.0607	31.0391	31.305	31.0496	31.4048	0.902266	O88544;F6QTS1;D3YV99;D3Z1R9	COP9 signalosome complex subunit 4	Cops4
34.4767	34.5275	34.5447	34.4819	34.492	34.6071	34.5728	34.4802	0.9792	O88569;O88569-3;O88569-2	Heterogeneous nuclear ribonucleoproteins A2/B1	Hnrnpa2b1
30.6298	30.7534	30.5736	30.5984	30.5419	30.5783	30.6608	30.4612	1.05574	O88587;O88587-2	Catechol O-methyltransferase	Comt
26.6741	26.8085	26.6617	NaN	26.547	26.6425	26.9933	26.9479	0.95402	O88630	Golgi SNAP receptor complex member 1	Gosr1
33.5983	33.6601	33.6436	33.6315	33.5085	33.3798	33.7109	33.4616	1.08536	O88653	Ragulator complex protein LAMTOR3	Lamtor3
26.3603	26.2623	26.1561	NaN	25.9585	26.231	26.5859	26.607	0.94211	O88662	Epithelial membrane protein 2	Emp2
26.7985	26.5564	26.6866	26.286	27.195	27.373	26.8658	27.2628	0.663296	O88668;K4DI63;J3QP41	Protein CREG1	Creg1
32.0396	31.9246	32.0034	32.0472	32.0129	32.2321	32.1771	32.1439	0.908904	O88685;A2AGN7;B7ZCF1	26S protease regulatory subunit 6A	Psmc3
27.7751	27.8284	27.833	27.9362	27.8577	27.6158	27.8102	27.7776	1.05544	O88696	ATP-dependent Clp protease proteolytic subunit, mitochondrial	Clpp
29.7569	29.6354	29.6324	29.6389	29.6785	29.5061	29.4134	29.2386	1.15409	O88712;O88712-2;O88712-3	C-terminal-binding protein 1	Ctbp1
27.4855	27.7165	27.3681	27.6986	28.4298	28.3248	27.8937	28.3821	0.619671	O88736;Q8C5N9	3-keto-steroid reductase	Hsd17b7
27.5508	27.4354	27.3125	27.336	27.187	27.4633	27.5517	27.2588	1.03059	O88746;Q3UDC3	Target of Myb protein 1	Tom1
27.7979	27.7217	27.9627	27.6697	27.6608	27.5836	27.6478	28.0146	1.04341	O88796	Ribonuclease P protein subunit p30	Rpp30
31.1603	30.9422	31.1317	31.1877	30.9941	31.3025	31.5532	31.3193	0.878552	O88811;O88811-2	Signal transducing adapter molecule 2	Stam2
NaN	NaN	NaN	NaN	24.462	NaN	NaN	NaN	NaN	O88839;O88839-4;O88839-3;O88839-2	Disintegrin and metalloproteinase domain-containing protein 15	Adam15
NaN	NaN	25.2993	NaN	NaN	NaN	NaN	NaN	NaN	O88842;Q3TNB8;O88842-2	FYVE, RhoGEF and PH domain-containing protein 3	Fgd3
32.5015	32.4933	32.4523	32.4762	32.6873	32.761	32.8935	32.6843	0.826049	O88844	Isocitrate dehydrogenase [NADP] cytoplasmic	Idh1
25.2808	25.3172	NaN	NaN	25.2482	25.1216	25.2635	25.3827	1.03168	O88848;O88848-2;D3Z067	ADP-ribosylation factor-like protein 6	Arl6
28.3756	27.8511	28.0793	28.3035	27.995	28.2514	27.7169	27.8471	1.14852	O88851	Putative hydrolase RBBP9	Rbbp9
NaN	NaN	NaN	NaN	NaN	NaN	NaN	24.972	NaN	O88874;Q3U3M5	Cyclin-K	Ccnk
27.5252	27.2398	27.5992	27.6153	26.9104	27.3667	27.5499	27.3148	1.15623	O88879;G3XA09;O88879-2	Apoptotic protease-activating factor 1	Apaf1
NaN	NaN	NaN	NaN	NaN	25.2885	NaN	NaN	NaN	O88895;Q3UM33;O88895-2	Histone deacetylase 3;Histone deacetylase	Hdac3
28.7798	28.6815	28.4746	28.711	28.5433	28.4982	28.2029	28.4656	1.17627	O88952	Protein lin-7 homolog C	Lin7c
28.946	28.7668	28.9437	28.8348	28.959	28.961	28.9447	28.8592	0.960495	O88958	Glucosamine-6-phosphate isomerase 1	Gnpda1
25.3231	25.2194	NaN	NaN	25.1896	NaN	NaN	NaN	1.05823	O88967	ATP-dependent zinc metalloprotease YME1L1	Yme1l1
27.0366	27.1451	26.8924	26.8495	27.2302	26.7834	26.9683	27.1558	0.963579	O88983	Syntaxin-8	Stx8
NaN	NaN	NaN	NaN	NaN	NaN	24.9658	NaN	NaN	O88986;E9PWY6	2-amino-3-ketobutyrate coenzyme A ligase, mitochondrial	Gcat
NaN	26.6186	NaN	NaN	NaN	NaN	NaN	NaN	NaN	O89001	Carboxypeptidase D	Cpd
NaN	NaN	NaN	NaN	NaN	NaN	NaN	22.9855	NaN	O89016	ATP-binding cassette sub-family D member 4	Abcd4
29.6378	29.4252	29.2734	29.4094	29.6253	29.4144	29.815	29.3741	0.919709	O89017	Legumain	Lgmn
30.9786	30.853	30.9295	30.8955	31.0737	31.3166	31.6865	31.2066	0.754347	O89023	Tripeptidyl-peptidase 1	Tpp1
26.199	NaN	NaN	26.3267	26.4329	26.4414	26.7239	26.6029	0.819363	O89032;O89032-3;O89032-2	SH3 and PX domain-containing protein 2A	Sh3pxd2a
NaN	NaN	NaN	NaN	NaN	NaN	25.5701	NaN	NaN	O89050	Muskelin	Mkln1
27.7309	27.3348	27.8856	27.8921	27.6915	27.7897	27.6064	27.6474	1.01896	O89051	Integral membrane protein 2B;BRI2, membrane form;BRI2 intracellular domain;BRI2C, soluble form;Bri23 peptide	Itm2b
31.8168	31.8093	31.8796	31.8055	31.8211	32.065	32.0757	32.1474	0.870852	O89053;G3UYK8	Coronin-1A;Coronin	Coro1a
31.3732	31.3883	31.3759	31.3198	31.1981	31.346	31.3351	31.4566	1.02126	O89079;D3Z315;F6YFR7	Coatomer subunit epsilon	Cope
32.3488	32.447	32.5454	32.4173	32.4072	32.4642	32.3941	32.5	0.998788	O89086;Q8BG13	Putative RNA-binding protein 3	Rbm3
29.7596	29.7965	29.8636	29.6683	29.8003	29.7188	29.9461	29.6016	1.00368	O89110	Caspase-8;Caspase-8 subunit p18;Caspase-8 subunit p10	Casp8
27.6888	27.334	27.7459	27.531	27.4558	27.4758	26.931	26.901	1.30498	O89112;B2KGR2	LanC-like protein 1	Lancl1
28.7962	28.776	28.6888	28.8112	28.7604	28.7049	28.8116	28.7815	1.00239	P00375	Dihydrofolate reductase	Dhfr
31.8495	31.6992	31.8936	31.8841	31.9713	31.7591	31.6576	31.9118	1.00462	P00405;Q7JCZ1	Cytochrome c oxidase subunit 2	Mtco2;mt-Co2
NaN	NaN	NaN	NaN	NaN	NaN	26.8943	NaN	NaN	Q7JCX7;P00416	Cytochrome c oxidase subunit 3	mt-Co3
31.3188	31.3909	31.3339	31.2476	31.4575	31.6062	31.5738	31.4746	0.867403	P00493	Hypoxanthine-guanine phosphoribosyltransferase	Hprt1
32.1147	31.5299	31.688	31.9786	32.6052	32.4027	32.5391	32.6436	0.607161	P01831	Thy-1 membrane glycoprotein	Thy1
29.1537	29.1225	29.317	29.3064	29.0638	29.1471	29.6039	29.1174	0.994367	P01887	Beta-2-microglobulin	B2m
28.2883	28.215	28.0251	27.8826	27.9979	28.3005	28.8861	28.6449	0.782086	P01899;P01897;E9PWT4;E9QJR9;P79568;P14430;P14429	H-2 class I histocompatibility antigen, D-B alpha chain;H-2 class I histocompatibility antigen, L-D alpha chain;H-2 class I histocompatibility antigen, Q8 alpha chain;H-2 class I histocompatibility antigen, Q7 alpha chain	H2-D1;H2-L;H2-Q7;H2-Q6;H2-Q8
NaN	NaN	NaN	26.038	26.8001	NaN	NaN	NaN	0.589637	P01901;Q3TH01;G3UXW2;P14428;P03991	H-2 class I histocompatibility antigen, K-B alpha chain;H-2 class I histocompatibility antigen, K-Q alpha chain;H-2 class I histocompatibility antigen, K-W28 alpha chain	H2-K1
28.8981	29.0294	28.9062	28.9425	29.6968	29.0366	NaN	NaN	0.746053	P01942;Q91VB8	Hemoglobin subunit alpha	Hba;Hba-a2
29.8765	30.0781	29.9673	29.9765	30.2647	30.2814	30.2463	30.3505	0.806013	P02463	Collagen alpha-1(IV) chain;Arresten	Col4a1
NaN	NaN	NaN	NaN	NaN	NaN	NaN	24.4187	NaN	P02802	Metallothionein-1	Mt1
NaN	NaN	NaN	NaN	25.1185	NaN	NaN	NaN	NaN	P03888	NADH-ubiquinone oxidoreductase chain 1	Mtnd1
26.4079	26.6415	NaN	26.7357	25.884	26.7888	NaN	26.8309	1.06718	Q9MD59;P03893	NADH-ubiquinone oxidoreductase chain 2	mt-Nd2;Mtnd2
27.0868	27.3432	27.374	27.6373	26.7593	27.7208	28.0022	27.2085	0.957686	Q7JCY6;P03911	NADH-ubiquinone oxidoreductase chain 4	mt-Nd4;Mtnd4
29.1642	28.9941	29.1268	29.0281	28.8478	29.071	28.8952	28.8354	1.1219	P03921;Q9MD82	NADH-ubiquinone oxidoreductase chain 5	Mtnd5;mt-Nd5
NaN	NaN	NaN	NaN	NaN	NaN	NaN	27.5147	NaN	P03930;Q7JCZ0	ATP synthase protein 8	Mtatp8;mt-Atp8
30.3905	30.3255	30.2784	30.4627	29.5431	29.4308	29.2909	29.2707	1.97301	P03958	Adenosine deaminase	Ada
NaN	NaN	NaN	NaN	NaN	NaN	NaN	26.146	NaN	P04117	Fatty acid-binding protein, adipocyte	Fabp4
25.5527	25.6589	25.6948	NaN	24.9078	NaN	NaN	NaN	1.65596	P04184	Thymidine kinase, cytosolic	Tk1
NaN	NaN	NaN	NaN	NaN	NaN	23.2042	NaN	NaN	P04202	Transforming growth factor beta-1;Latency-associated peptide	Tgfb1
NaN	NaN	NaN	NaN	NaN	25.9151	25.5297	25.5135	NaN	P04627;Q8CAD1;B1AUP0;B1AUN8;E9Q0P8	Serine/threonine-protein kinase A-Raf	Araf
27.2507	27.2363	27.2197	NaN	27.258	27.092	27.2696	27.1692	1.02695	P04925	Major prion protein	Prnp
35.4103	35.4372	35.4161	35.4063	35.6717	35.6528	35.6984	35.7248	0.829636	P05064;A6ZI44;D3YWI1	Fructose-bisphosphate aldolase A	Aldoa
30.5817	30.4936	30.5075	30.599	30.4319	30.6375	30.5483	30.7626	0.966187	P05132;P05132-2	cAMP-dependent protein kinase catalytic subunit alpha	Prkaca
31.1382	31.1805	31.1881	31.1672	31.2648	31.2494	31.376	31.2294	0.925689	P05201	Aspartate aminotransferase, cytoplasmic	Got1
33.4426	33.4324	33.4116	33.3915	33.2745	33.344	33.5227	33.4455	1.01596	P05202	Aspartate aminotransferase, mitochondrial	Got2
36.3236	36.2914	36.2733	36.321	36.2277	36.0571	36.1893	36.0945	1.11742	P05213	Tubulin alpha-1B chain	Tuba1b
29.9083	29.9593	30.1146	29.8467	29.9413	30.0033	30.1199	29.8928	0.977996	P05480;Q80XU2	Neuronal proto-oncogene tyrosine-protein kinase Src	Src
33.9634	34.0848	34.0113	34.03	34.3957	34.4548	34.524	34.3952	0.747399	P06745	Glucose-6-phosphate isomerase	Gpi
30.2581	30.1606	30.1357	30.1069	29.7432	29.721	29.7427	30.0316	1.27961	P06797	Cathepsin L1;Cathepsin L1 heavy chain;Cathepsin L1 light chain	Ctsl
27.3275	27.0464	27.3065	27.1126	27.1702	27.3485	27.3696	27.0731	0.97124	P06800;S4R1M0;S4R2V1;S4R2V2;S4R1S4;P06800-3;P06800-2	Receptor-type tyrosine-protein phosphatase C	Ptprc
31.4366	31.5087	31.5106	31.5542	31.6134	31.5625	31.6754	31.5526	0.934036	P06801	NADP-dependent malic enzyme	Me1
24.7813	24.755	24.9816	24.4338	NaN	24.7363	NaN	24.2501	1.18487	P06837	Neuromodulin	Gap43
28.2431	27.892	27.7554	28.4065	27.5893	27.8919	27.8781	27.4598	1.29188	P06869	Urokinase-type plasminogen activator;Urokinase-type plasminogen activator long chain A;Urokinase-type plasminogen activator short chain A;Urokinase-type plasminogen activator chain B	Plau
33.0804	33.0488	33.243	33.2359	33.129	33.1709	32.874	33.2039	1.04071	P07091;D3YUT9	Protein S100-A4;Protein S100	S100a4
31.8085	31.6804	31.755	31.6644	31.5716	31.572	31.6194	31.7454	1.07175	Q5NCU4;P07214	SPARC	Sparc
36.1842	36.1942	36.1518	36.1353	36.1856	36.1027	36.1048	36.0773	1.03439	P07356;B0V2N5;B0V2N7;B0V2N8	Annexin A2;Annexin	Anxa2
26.6162	26.792	26.7016	26.7401	26.3738	26.2155	26.3853	NaN	1.30822	P07607;D6RCW9	Thymidylate synthase	Tyms
30.6928	30.5645	30.6816	30.5649	30.748	30.9534	31.0258	30.9285	0.819051	P07742	Ribonucleoside-diphosphate reductase large subunit	Rrm1
34.8201	34.7371	34.7898	34.7913	34.6936	34.6597	34.5466	34.6283	1.11151	P07901	Heat shock protein HSP 90-alpha	Hsp90aa1
NaN	NaN	NaN	NaN	NaN	NaN	NaN	24.0727	NaN	P07903	DNA excision repair protein ERCC-1	Ercc1
34.5255	34.5392	34.5301	34.638	34.3864	34.5152	34.5429	34.5303	1.04572	P08003	Protein disulfide-isomerase A4	Pdia4
31.8904	31.8202	31.9393	31.8371	31.8118	31.9218	31.7221	31.8437	1.03304	P08030	Adenine phosphoribosyltransferase	Aprt
30.0951	30.0589	30.0956	29.9037	28.6992	28.9833	28.8884	29.0026	2.21138	P08074;F6YNX9	Carbonyl reductase [NADPH] 2	Cbr2
36.0422	36.1069	36.0781	36.0757	36.0823	36.0941	36.1344	36.0688	0.986797	P08113	Endoplasmin	Hsp90b1
32.0905	31.968	32.0688	32.0044	31.5613	31.4267	31.6271	31.3342	1.45963	P08121	Collagen alpha-1(III) chain	Col3a1
27.8444	27.7705	27.8237	28.0008	28.3613	28.3508	28.5411	28.6169	0.656253	P08122	Collagen alpha-2(IV) chain;Canstatin	Col4a2
32.7108	32.7118	32.7812	32.6307	32.7095	32.7692	32.921	32.825	0.934619	P08207	Protein S100-A10	S100a10
28.9186	28.6542	28.5792	28.6854	29.5687	29.5282	29.6196	29.3686	0.569621	P08226;G3UZT1;G3UWN5	Apolipoprotein E	Apoe
33.5049	33.5641	33.5985	33.6162	33.4793	33.3105	33.3672	33.3599	1.14211	P08228	Superoxide dismutase [Cu-Zn]	Sod1
34.5172	34.5906	34.6091	34.5208	34.4902	34.5037	34.4791	34.4503	1.05599	P08249	Malate dehydrogenase, mitochondrial	Mdh2
NaN	NaN	NaN	NaN	NaN	NaN	NaN	24.3764	NaN	P08556;Q9D091	GTPase NRas	Nras
33.3825	33.4639	33.5097	33.4625	33.1797	33.4401	33.4619	33.3812	1.06358	P08752	Guanine nucleotide-binding protein G(i) subunit alpha-2	Gnai2
27.7619	27.7507	27.9297	27.9125	27.955	27.9187	27.9958	27.5975	0.980745	P08775	DNA-directed RNA polymerase II subunit RPB1	Polr2a
29.2631	29.4164	29.4214	29.1425	30.1031	29.8489	29.9235	30.1857	0.613676	P08905;P17897	Lysozyme C-2;Lysozyme C-1	Lyz2;Lyz1
NaN	NaN	NaN	NaN	24.9961	NaN	NaN	NaN	NaN	P09041	Phosphoglycerate kinase 2	Pgk2
33.7863	33.8015	33.8926	33.813	33.5437	33.7979	33.6716	33.7345	1.09918	P09055;P09055-2	Integrin beta-1	Itgb1
36.2101	36.1649	36.1972	36.2131	36.1839	36.0267	36.0541	36.0167	1.09124	P09103	Protein disulfide-isomerase	P4hb
34.9216	35.0095	34.977	34.9407	34.8753	34.957	35.0201	34.9253	1.0124	P09405	Nucleolin	Ncl
35.3029	35.2791	35.2579	35.3205	35.2723	35.3221	35.2963	35.2343	1.00615	P09411;S4R2M7	Phosphoglycerate kinase 1;Phosphoglycerate kinase	Pgk1
29.47	29.0633	29.1983	29.1018	30.05	29.6295	29.7273	29.774	0.665795	P09528	Ferritin heavy chain;Ferritin heavy chain, N-terminally processed	Fth1
31.5257	31.5821	31.6015	31.5632	31.1491	31.9135	31.7679	31.5364	0.983775	P09602;A3KGL9;F6W687;Q5XK38;B7ZCQ3;E9Q2Z4;J3QM43	Non-histone chromosomal protein HMG-17	Hmgn2;Gm16494;Gm6594
30.2784	30.382	30.0935	30.1499	30.6032	29.9121	30.1989	29.9668	1.03936	P09671	Superoxide dismutase [Mn], mitochondrial	Sod2
31.7264	31.4084	31.6933	31.7684	31.4698	32.1042	31.897	32.0075	0.858268	Q3THW5;P0C0S6;Q8R029;Q3UA95	Histone H2A.V;Histone H2A.Z;Histone H2A	H2afv;H2afz
26.3836	26.4392	26.3598	26.3672	27.821	27.8083	27.5416	27.5486	0.408264	P0C605-2;P0C605	cGMP-dependent protein kinase 1	Prkg1
NaN	NaN	NaN	NaN	NaN	NaN	NaN	NaN	NaN	P0DJF2	Protein PET117 homolog, mitochondrial	Pet117
35.662	35.7009	35.6246	35.6711	36.1298	36.0757	35.9882	36.0878	0.754857	P10107	Annexin A1	Anxa1
36.8076	36.8681	36.8869	36.9226	36.7896	36.9311	36.8438	36.8782	1.00739	P10126;D3YZ68	Elongation factor 1-alpha 1	Eef1a1
NaN	NaN	NaN	NaN	NaN	25.8278	NaN	26.1343	NaN	P10287	Cadherin-3	Cdh3
28.9359	28.8139	28.7037	28.6844	28.539	28.8	28.8499	28.5445	1.07261	P10404;P11370	MLV-related proviral Env polyprotein;Surface protein;Transmembrane protein;Retrovirus-related Env polyprotein from Fv-4 locus	Fv4
32.1862	32.1499	32.1586	32.1323	32.4727	32.4047	32.3567	32.3504	0.847112	P10493	Nidogen-1	Nid1
28.3367	28.1952	28.1029	28.1715	28.2021	28.3448	28.3656	28.1017	0.964615	P10518	Delta-aminolevulinic acid dehydratase	Alad
33.3378	33.2658	33.3969	33.3418	33.5878	33.4678	33.6534	33.4247	0.871849	P10605	Cathepsin B;Cathepsin B light chain;Cathepsin B heavy chain	Ctsb
30.7045	30.5882	30.7679	30.7325	30.7701	30.818	30.8805	30.8061	0.919933	P10630;P10630-2;Q8BTU6;E9Q561	Eukaryotic initiation factor 4A-II	Eif4a2
33.4282	33.3128	33.4572	33.5509	33.1635	33.3178	33.1004	33.5274	1.11729	P10639	Thioredoxin	Txn
30.6564	30.5079	30.6694	30.708	30.5383	30.7111	30.6168	30.4948	1.03181	P10649;A2AE89;F6WHQ7	Glutathione S-transferase Mu 1	Gstm1
30.0354	29.8817	29.958	29.9816	29.7938	29.8639	30.0284	29.9067	1.04679	P10711;E9PYD5;P10711-2	Transcription elongation factor A protein 1	Tcea1
30.6327	30.5894	30.5715	30.5736	30.926	30.6023	30.7593	30.4226	0.942295	P10833	Ras-related protein R-Ras	Rras
31.971	31.9939	32.0173	32.0231	31.7315	32.051	32.1893	31.981	1.00914	P10852;P10852-2	4F2 cell-surface antigen heavy chain	Slc3a2
36.1092	35.9656	36.0829	36.0196	36.0441	36.0296	35.9547	35.9692	1.03163	P10853;Q8CBB6;Q8CGP1;Q64475;Q8CGP2;Q8CGP2-2;Q9D2U9;P70696;Q8CGP0;Q64524	Histone H2B type 1-F/J/L;Histone H2B;Histone H2B type 1-K;Histone H2B type 1-B;Histone H2B type 1-P;Histone H2B type 3-A;Histone H2B type 1-A;Histone H2B type 3-B;Histone H2B type 2-E	Hist1h2bf;Hist1h2br;Hist1h2bk;Hist1h2bb;Hist1h2bp;Hist3h2ba;Hist1h2ba;Hist3h2bb;Hist2h2be
31.0374	31.1595	31.1953	30.9944	31.2573	31.1911	31.2307	31.234	0.912803	P10922	Histone H1.0;Histone H1.0, N-terminally processed	H1f0
28.5328	28.7911	28.7967	28.6071	28.992	29.2833	29.3389	29.2603	0.689346	P11031	Activated RNA polymerase II transcriptional coactivator p15	Sub1
35.8977	35.8851	35.9093	35.8756	35.8454	35.7624	35.9289	35.7961	1.04154	P11087;P11087-2	Collagen alpha-1(I) chain	Col1a1
NaN	NaN	NaN	NaN	23.7575	NaN	NaN	NaN	NaN	P11152	Lipoprotein lipase	Lpl
28.9913	28.8771	28.9168	29.0498	28.7676	28.8176	28.5779	28.6882	1.18585	P11157	Ribonucleoside-diphosphate reductase subunit M2	Rrm2
38.7435	38.7161	38.7548	38.7589	38.6719	38.5919	38.6513	38.6232	1.07829	P11276	Fibronectin;Anastellin	Fn1
31.0867	31.0554	31.0598	31.1272	30.6764	30.8215	30.8131	30.8194	1.23087	P11352	Glutathione peroxidase 1	Gpx1
NaN	NaN	NaN	NaN	25.9346	26.5799	27.0296	NaN	NaN	P11404	Fatty acid-binding protein, heart	Fabp3
30.5355	30.328	30.4031	30.4357	30.4599	30.8857	30.9297	30.5199	0.827468	P11438	Lysosome-associated membrane glycoprotein 1	Lamp1
31.4019	31.4671	31.4261	31.3964	30.7636	31.0345	30.7573	31.0172	1.44365	P11440;D3Z2T9	Cyclin-dependent kinase 1	Cdk1
36.4126	36.3858	36.4288	36.4165	36.4243	36.4565	36.195	36.4652	1.01796	P11499	Heat shock protein HSP 90-beta	Hsp90ab1
26.5218	26.7279	NaN	26.6903	NaN	26.7919	NaN	26.4415	1.02099	P11531;A2A9Z1;A2A9Z2	Dystrophin	Dmd
32.9574	32.9247	32.9	32.9004	33.1381	33.3412	33.1949	33.3883	0.787308	P11688	Integrin alpha-5;Integrin alpha-5 heavy chain;Integrin alpha-5 light chain	Itga5
29.7467	29.5889	29.7241	29.7428	30.017	30.032	30.1371	30.1168	0.771052	P11835;Q542I8;M0QWA7	Integrin beta-2;Integrin beta	Itgb2
NaN	NaN	NaN	NaN	NaN	NaN	26.2182	NaN	NaN	P11862;D3Z503;D3YWD9	Growth arrest-specific protein 2	Gas2
NaN	NaN	NaN	NaN	25.1266	NaN	NaN	NaN	NaN	P11881;P11881-2;P11881-8;P11881-7;P11881-6;P11881-5;P11881-4;P11881-3	Inositol 1,4,5-trisphosphate receptor type 1	Itpr1
NaN	NaN	NaN	NaN	NaN	25.4173	NaN	NaN	NaN	P11930	Nucleoside diphosphate-linked moiety X motif 19, mitochondrial	Nudt19
34.0102	34.051	34.028	34.0381	34.1031	34.1493	34.1133	34.1756	0.930772	P11983;P11983-2	T-complex protein 1 subunit alpha	Tcp1
28.8061	28.8705	28.7619	28.8622	28.6173	28.7569	28.5701	28.8537	1.09102	P12023;P12023-3;P12023-2	Amyloid beta A4 protein;N-APP;Soluble APP-alpha;Soluble APP-beta;C99;Beta-amyloid protein 42;Beta-amyloid protein 40;C83;P3(42);P3(40);C80;Gamma-secretase C-terminal fragment 59;Gamma-secretase C-terminal fragment 57;Gamma-secretase C-terminal fragment 50;C31	App
NaN	27.7454	27.5159	27.4946	27.1588	27.8233	28.8432	28.3307	0.730168	P12032	Metalloproteinase inhibitor 1	Timp1
30.9321	30.8985	30.8887	30.8989	31.1115	31.0194	31.3953	31.1266	0.83587	P12265	Beta-glucuronidase	Gusb
31.5307	31.5867	31.6157	31.5986	32.0207	31.8888	32.0335	31.8175	0.780678	P12382	ATP-dependent 6-phosphofructokinase, liver type	Pfkl
28.0477	28.1541	28.2618	28.0542	28.1874	27.9679	27.9739	27.9214	1.08433	P12388	Plasminogen activator inhibitor 2, macrophage	Serpinb2
NaN	NaN	NaN	NaN	NaN	24.7985	NaN	NaN	NaN	P12400	Protein CTLA-2-beta	Ctla2b
NaN	NaN	NaN	NaN	NaN	NaN	NaN	24.4854	NaN	P12658	Calbindin	Calb1
32.1455	31.8807	32.1733	32.1678	31.8589	31.8463	31.7375	31.9745	1.17897	P12787	Cytochrome c oxidase subunit 5A, mitochondrial	Cox5a
29.196	29.4823	29.3558	29.416	29.5002	29.4361	29.3656	29.3284	0.969256	P12815-2;P12815	Programmed cell death protein 6	Pdcd6
34.207	34.324	34.3652	34.2473	34.2947	34.3468	34.1381	34.2909	1.01273	P12970;L7N202;D3YXT4;F6YI27;F6ZVW4	60S ribosomal protein L7a	Rpl7a
NaN	NaN	NaN	NaN	NaN	NaN	NaN	25.8261	NaN	P13516;P13011;Q99PL7;Q6T707	Acyl-CoA desaturase 1;Acyl-CoA desaturase 2	Scd1;Scd2;Scd3;Scd4
35.8941	35.8827	35.8879	35.9651	35.6431	35.6469	35.6442	35.6607	1.19642	P13020-2;P13020	Gelsolin	Gsn
30.6289	30.74	30.7133	30.7991	30.4025	30.8382	30.6474	30.6467	1.06188	P13439	Uridine 5-monophosphate synthase;Orotate phosphoribosyltransferase;Orotidine 5-phosphate decarboxylase	Umps
32.7781	32.8533	32.7611	32.8079	33.3278	33.2295	33.3864	33.1575	0.719367	P13595	Neural cell adhesion molecule 1	Ncam1
NaN	NaN	NaN	NaN	NaN	NaN	25.5714	NaN	NaN	P13597;P13597-2	Intercellular adhesion molecule 1	Icam1
28.4793	28.638	28.5453	28.6329	28.3495	28.5297	28.7554	28.5008	1.02813	P13864;J3QNW0;P13864-2	DNA (cytosine-5)-methyltransferase 1;Cytosine-specific methyltransferase	Dnmt1
35.6797	35.5147	35.6175	35.6134	35.559	35.9645	35.5884	35.722	0.931644	P14069	Protein S100-A6	S100a6
28.4998	28.9858	28.7808	29.0076	27.8371	27.8314	27.9749	27.8741	1.91736	P14094	Sodium/potassium-transporting ATPase subunit beta-1	Atp1b1
28.5746	28.395	28.5215	28.3467	28.8686	28.5696	28.9369	28.7256	0.803447	P14106	Complement C1q subcomponent subunit B	C1qb
32.4249	32.554	32.6501	32.686	32.5501	32.5959	32.6642	32.5566	0.991064	P14115	60S ribosomal protein L27a	Rpl27a
34.3053	34.369	34.3907	34.3168	34.3586	34.4048	34.377	34.475	0.960329	P14131	40S ribosomal protein S16	Rps16
34.1319	34.1102	34.2614	34.2498	34.2173	34.0998	34.1692	34.2661	1.00016	P14148;F6XI62	60S ribosomal protein L7	Rpl7
32.5072	32.5927	32.485	32.5373	32.6713	32.505	32.6585	32.4705	0.968769	P14152	Malate dehydrogenase, cytoplasmic	Mdh1
34.0561	34.006	34.0431	33.977	34.085	34.1168	33.9415	34.2253	0.951582	P14206	40S ribosomal protein SA	Rpsa
35.4292	35.505	35.3672	35.4639	35.483	35.5217	35.5538	35.4663	0.956028	P14211	Calreticulin	Calr
30.8163	30.9443	30.8799	30.9438	30.914	31.0896	31.179	30.9997	0.901563	P14576;E9PXC0	Signal recognition particle 54 kDa protein	Srp54;Srp54c
33.4736	33.5333	33.5088	33.5095	34.1336	33.8807	33.9037	33.9835	0.722428	P14602;P14602-2;P14602-3;D3YZ06	Heat shock protein beta-1	Hspb1
32.4822	32.4159	32.4246	32.4914	32.5094	32.6475	32.5615	32.6122	0.914386	P14685	26S proteasome non-ATPase regulatory subunit 3	Psmd3
32.839	32.8072	32.8866	32.8866	32.5552	32.5554	32.6759	32.6438	1.18696	P14733	Lamin-B1	Lmnb1
35.722	35.6926	35.7082	35.7296	35.7893	35.7183	35.7236	35.7039	0.985771	P14824	Annexin A6	Anxa6
33.7081	33.6984	33.6228	33.6171	33.7207	33.7535	33.8281	33.6871	0.942295	P14869;E9Q070;S4R1N1;D3YVM5	60S acidic ribosomal protein P0	Rplp0;Gm8730
32.59	32.6789	32.5746	32.6309	32.901	32.904	32.9706	32.9738	0.801764	P14873	Microtubule-associated protein 1B;MAP1B heavy chain;MAP1 light chain LC1	Map1b
30.5833	30.3866	30.4567	30.4664	30.6081	30.5844	30.4108	30.2724	1.003	P14901;H3BKP1	Heme oxygenase 1	Hmox1
28.3047	28.6299	28.8406	28.7749	27.2605	27.2284	27.1308	27.1178	2.73805	P15306	Thrombomodulin	Thbd
30.4574	30.1947	30.2703	30.5	30.2344	30.5288	29.8311	30.52	1.05484	P15532;Q5NC80	Nucleoside diphosphate kinase A;Nucleoside diphosphate kinase	Nme1
25.7085	26.5067	26.1515	26.2215	26.7748	26.3568	26.2262	26.5425	0.796626	P15535-2;P15535;B1AXY5	Beta-1,4-galactosyltransferase 1;Lactose synthase A protein;N-acetyllactosamine synthase;Beta-N-acetylglucosaminylglycopeptide beta-1,4-galactosyltransferase;Beta-N-acetylglucosaminyl-glycolipid beta-1,4-galactosyltransferase;Processed beta-1,4-galactosyltransferase 1	B4galt1
30.7708	30.7333	30.9311	30.8397	31.1841	31.2034	31.3491	31.2027	0.749448	P15626;D3YX76	Glutathione S-transferase Mu 2	Gstm2
25.71	25.7524	25.6974	25.6113	26.1221	26.0307	26.0146	26.3669	0.736726	P15655;Q925A1;Q925A2	Fibroblast growth factor 2;Fibroblast growth factor	Fgf2
34.8499	34.8116	34.9019	34.7561	34.9665	34.6585	34.4131	34.7634	1.09391	P15864	Histone H1.2	Hist1h1c
25.7269	26.3499	25.7108	25.8952	26.2303	26.4258	26.2322	26.2806	0.772965	P15920	V-type proton ATPase 116 kDa subunit a isoform 2	Atp6v0a2
35.8848	35.8867	35.8773	35.9538	36.0114	36.0859	36.1347	36.1434	0.874664	P16045	Galectin-1	Lgals1
31.5925	31.3565	31.487	31.6002	32.0384	32.0554	32.3301	31.9601	0.665749	P16110;Q8C253	Galectin-3;Galectin	Lgals3
31.3977	31.2477	31.3427	31.3886	30.8483	30.8054	30.9096	30.683	1.44653	P16125;D3Z7F0	L-lactate dehydrogenase B chain;L-lactate dehydrogenase	Ldhb
28.771	28.7454	28.7209	28.4937	28.8072	28.8929	29.0529	28.7494	0.874876	P16254	Signal recognition particle 14 kDa protein;Signal recognition particle 14 kDa protein, N-terminally processed	Srp14
NaN	NaN	25.797	NaN	25.7608	NaN	26.0032	NaN	0.942785	P16330;P16330-2	2,3-cyclic-nucleotide 3-phosphodiesterase	Cnp
27.6315	27.6013	27.4504	27.7142	27.8206	27.1659	27.6258	27.3043	1.08689	P16332	Methylmalonyl-CoA mutase, mitochondrial	Mut
32.9457	32.9483	32.9861	33.0641	33.0856	33.0316	33.0921	33.1292	0.933955	P16460;J3QNG0	Argininosuccinate synthase	Ass1;Gm5424
34.4226	34.503	34.4524	34.4692	34.4972	34.521	34.6383	34.5316	0.942638	P16546;P16546-2;A3KGU7;A3KGU5;E9Q447	Spectrin alpha chain, non-erythrocytic 1	Sptan1
NaN	NaN	NaN	NaN	NaN	NaN	24.7784	NaN	NaN	P16627	Heat shock 70 kDa protein 1-like	Hspa1l
36.3212	36.3706	36.3887	36.3959	36.5439	36.3917	36.3887	36.4377	0.951714	P16858;S4R257;D3YYI5	Glyceraldehyde-3-phosphate dehydrogenase	Gapdh;Gm7293
31.5064	31.2647	31.5258	31.5049	31.4767	31.7705	32.1882	31.5512	0.814395	P17047;P17047-3;P17047-2	Lysosome-associated membrane glycoprotein 2	Lamp2
32.3351	32.4515	32.4634	32.3006	32.2381	32.2493	32.0364	32.3886	1.11694	P17095	High mobility group protein HMG-I/HMG-Y	Hmga1
29.6567	29.67	NaN	29.7132	29.3274	28.9926	28.819	29.1958	1.5118	P17095-1	High mobility group protein HMG-I/HMG-Y	Hmga1
28.1544	28.1591	28.0975	28.1308	28.4111	28.1449	28.5882	28.1009	0.885261	P17125;Q91YU7	Transforming growth factor beta-3;Latency-associated peptide	Tgfb3
29.0963	29.1611	29.0542	29.0497	29.5522	29.8027	29.5269	29.5971	0.692843	P17156	Heat shock-related 70 kDa protein 2	Hspa2
36.2099	36.1889	36.1645	36.2127	36.3983	36.2029	36.1251	36.2316	0.968971	P17182;Q6PHC1	Alpha-enolase	Eno1
32.449	32.5216	32.4927	32.4505	32.4946	32.4996	32.492	32.5287	0.982633	P17426;P17426-2	AP-2 complex subunit alpha-1	Ap2a1
31.9705	31.7874	31.8908	31.9361	31.7694	31.7514	31.7417	31.6335	1.12678	P17427	AP-2 complex subunit alpha-2	Ap2a2
27.8072	27.9652	27.8033	28.0595	28.1327	27.7387	27.704	27.8077	1.04465	P17439	Glucosylceramidase	Gba
29.5176	29.5696	29.5485	29.4429	29.6408	28.5949	29.5534	29.142	1.21999	P17665;J3QNB4	Cytochrome c oxidase subunit 7C, mitochondrial	Cox7c
32.0852	32.0822	32.1355	32.094	32.1053	32.1548	32.1973	32.1662	0.961477	P17710-3;P17710;G3UVV4;P17710-4;P17710-2	Hexokinase-1	Hk1
35.7242	35.6965	35.7275	35.6758	35.5872	35.5235	35.4489	35.5518	1.13143	P17742	Peptidyl-prolyl cis-trans isomerase A;Peptidyl-prolyl cis-trans isomerase A, N-terminally processed	Ppia
34.0146	34.0193	34.0367	34.0505	34.2102	34.1696	34.1493	34.3052	0.883744	P17751;H7BXC3	Triosephosphate isomerase	Tpi1
26.188	26.0478	25.259	NaN	26.6927	27.5531	27.5076	27.0381	0.387891	P17809	Solute carrier family 2, facilitated glucose transporter member 1	Slc2a1
32.0388	32.1218	32.0284	31.9834	32.5852	32.6089	32.8168	32.6955	0.644611	P17879;Q61696	Heat shock 70 kDa protein 1B;Heat shock 70 kDa protein 1A	Hspa1b;Hspa1a
32.136	32.089	32.106	32.1044	31.8347	31.8582	31.9158	31.8981	1.17458	P17918	Proliferating cell nuclear antigen	Pcna
26.768	26.7672	26.8153	26.875	26.8065	26.6561	26.7238	26.646	1.07049	P18052;Q91V35;P18052-2	Receptor-type tyrosine-protein phosphatase alpha;Receptor-type tyrosine-protein phosphatase	Ptpra
27.9959	28.8328	28.421	28.4387	28.3446	28.5969	28.9191	28.8306	0.840489	P18155	Bifunctional methylenetetrahydrofolate dehydrogenase/cyclohydrolase, mitochondrial;NAD-dependent methylenetetrahydrofolate dehydrogenase;Methenyltetrahydrofolate cyclohydrolase	Mthfd2
33.4728	33.3877	33.471	33.4406	33.4645	33.5429	33.5773	33.7429	0.908227	P18242;F6Y6L6;F8WIR1	Cathepsin D	Ctsd
31.0494	30.9354	30.9293	31.0449	29.9862	30.2396	30.071	30.2239	1.8145	P18406	Protein CYR61	Cyr61
NaN	31.3165	31.3733	NaN	27.939	28.0339	NaN	27.9778	10.2769	P18608;D3Z607	Non-histone chromosomal protein HMG-14	Hmgn1
29.6218	29.6698	29.6151	29.7083	30.1605	29.9807	30.2073	30.0633	0.732449	P18654;B1AXN9	Ribosomal protein S6 kinase alpha-3	Rps6ka3
35.9743	35.9346	35.946	35.9919	35.8711	35.956	35.7435	35.9642	1.05555	P18760;F8WGL3	Cofilin-1	Cfl1
27.1392	27.4185	27.2653	27.3168	27.2323	NaN	26.976	NaN	1.13351	P18828;P18828-2	Syndecan-1	Sdc1
34.4081	34.4021	34.3955	34.4467	34.4056	34.55	34.4679	34.5357	0.948224	P19096	Fatty acid synthase;[Acyl-carrier-protein] S-acetyltransferase;[Acyl-carrier-protein] S-malonyltransferase;3-oxoacyl-[acyl-carrier-protein] synthase;3-oxoacyl-[acyl-carrier-protein] reductase;3-hydroxyacyl-[acyl-carrier-protein] dehydratase;Enoyl-[acyl-carrier-protein] reductase;Oleoyl-[acyl-carrier-protein] hydrolase	Fasn
32.3391	32.3869	32.3064	32.3801	32.3289	32.1819	32.054	32.1109	1.13619	P19157;P46425	Glutathione S-transferase P 1;Glutathione S-transferase P 2	Gstp1;Gstp2
33.1104	33.1833	33.0656	33.0681	33.2868	33.076	33.3057	33.1879	0.928356	P19253;E9Q5A0;S4R281	60S ribosomal protein L13a	Rpl13a
36.2909	36.3229	36.3269	36.3058	36.2098	36.2946	36.3137	36.1824	1.04355	P19324	Serpin H1	Serpinh1
31.2381	30.7889	30.9111	31.1671	30.8952	30.6895	30.8473	30.6841	1.18696	P19536;Q9D881	Cytochrome c oxidase subunit 5B, mitochondrial	Cox5b
31.7366	31.7709	31.8379	31.751	31.7452	31.8281	31.7842	31.6738	1.01134	P19783	Cytochrome c oxidase subunit 4 isoform 1, mitochondrial	Cox4i1
26.9946	27.1158	27.1754	NaN	27.742	NaN	27.5575	NaN	0.680901	P19788	Matrix Gla protein	Mgp
29.1577	29.2143	29.3001	29.2633	29.6616	29.4604	29.5586	29.3934	0.820941	P19973;A2A6J7	Lymphocyte-specific protein 1	Lsp1
NaN	NaN	NaN	NaN	NaN	NaN	NaN	24.9888	NaN	P19973-2;A2A6J4	Lymphocyte-specific protein 1	Lsp1
36.514	36.4959	36.532	36.4959	36.5039	36.4064	36.592	36.4373	1.01716	P20029	78 kDa glucose-regulated protein	Hspa5
30.8169	30.8247	30.7894	30.7714	31.2572	30.8983	30.9988	30.9295	0.858357	P20060	Beta-hexosaminidase subunit beta	Hexb
35.0177	34.8859	34.8775	34.9	35.2368	34.9866	34.4892	34.9906	0.996178	P20065-2;P20065	Thymosin beta-4;Hematopoietic system regulatory peptide	Tmsb4x
30.642	30.7161	30.7996	30.7446	30.7409	30.4951	30.684	30.7054	1.04915	P20108	Thioredoxin-dependent peroxide reductase, mitochondrial	Prdx3
37.8439	37.7632	37.7709	37.7827	37.8188	37.8114	37.881	37.8348	0.9684	P20152	Vimentin	Vim
28.9986	28.6507	28.7481	28.9252	28.8531	28.8946	28.5586	28.2456	1.14288	P20352	Tissue factor	F3
28.012	27.8072	27.9756	28.3381	28.3592	27.8054	28.2174	27.89	0.976184	P20491	High affinity immunoglobulin epsilon receptor subunit gamma	Fcer1g
NaN	NaN	NaN	NaN	NaN	NaN	NaN	24.9482	NaN	P20664;J3QN19	DNA primase small subunit;DNA primase	Prim1
31.9662	31.8265	31.9253	32.0379	31.3068	31.7739	32.1826	32.1602	1.05929	P21107	Tropomyosin alpha-3 chain	Tpm3
33.2047	33.1387	33.0536	33.0446	33.0963	32.9609	33.15	33.0071	1.04017	P21107-2;D3Z2H9	Tropomyosin alpha-3 chain	Tpm3;Tpm3-rs7
29.4526	29.4262	29.5132	29.6204	29.6399	29.6534	29.8457	29.4688	0.901969	P21126	Ubiquitin-like protein 4A	Ubl4a
30.2782	30.2782	30.2608	30.223	30.0828	30.0821	30.115	29.9803	1.14472	P21278	Guanine nucleotide-binding protein subunit alpha-11	Gna11
31.0987	31.0514	31.0583	31.132	30.667	30.6493	30.8514	30.6254	1.30751	P21279	Guanine nucleotide-binding protein G(q) subunit alpha	Gnaq
NaN	NaN	NaN	NaN	NaN	NaN	NaN	27.0953	NaN	P21300	Aldose reductase-related protein 1	Akr1b7
28.9408	28.8593	27.9842	28.7969	30.2639	30.7896	30.7169	30.0926	0.283133	P21550;Q5SX59	Beta-enolase;Enolase	Eno3
28.8618	28.9921	28.8755	28.8859	29.108	28.5596	28.5893	28.666	1.12748	P21619;P21619-2	Lamin-B2	Lmnb2
30.9978	31.1828	31.0473	31.0657	31.0599	30.9715	31.2815	31.0364	0.990394	P21956-2;P21956	Lactadherin	Mfge8
24.6301	NaN	NaN	24.9641	NaN	NaN	NaN	NaN	NaN	P21958;Q3TBA3;F6QHF1	Antigen peptide transporter 1	Tap1
31.4931	31.61	31.5747	31.5003	31.8347	31.8256	31.7132	31.8139	0.839542	P21981	Protein-glutamine gamma-glutamyltransferase 2	Tgm2
NaN	NaN	NaN	NaN	NaN	NaN	NaN	26.1081	NaN	P21995	Embigin	Emb
28.2683	28.035	28.0331	28.3076	28.3724	28.4694	28.3569	28.2667	0.867328	P22315;Q544X6	Ferrochelatase, mitochondrial;Ferrochelatase	Fech
27.3371	27.227	27.1932	27.2703	27.4745	27.3601	27.3187	27.2847	0.931353	P22366;P22366-2	Myeloid differentiation primary response protein MyD88	Myd88
27.4514	27.0427	26.9106	27.2332	27.4369	27.0663	27.7584	27.2638	0.85745	P22437	Prostaglandin G/H synthase 1	Ptgs1
28.5477	28.3175	28.4882	28.3904	28.2855	28.3846	28.4883	28.4583	1.02227	P22682	E3 ubiquitin-protein ligase CBL	Cbl
26.6058	26.905	26.9691	26.6481	26.5217	NaN	26.155	26.3659	1.35141	P22725-2;P22725	Protein Wnt-5a	Wnt5a
30.9688	30.911	30.9795	30.9935	30.9167	30.9966	31.1334	30.9748	0.97119	P22892;Q8CBB7	AP-1 complex subunit gamma-1	Ap1g1
28.4039	28.6479	28.5357	28.4945	28.6274	28.6564	28.8021	28.558	0.90722	P22907;P22907-2	Porphobilinogen deaminase	Hmbs
28.1626	28.2973	28.4191	27.6559	30.4772	30.4127	30.9721	29.7232	0.2084	P22935	Cellular retinoic acid-binding protein 2	Crabp2
33.8257	33.8092	33.8595	33.9029	33.8856	33.8748	33.9902	33.9508	0.948668	P23116	Eukaryotic translation initiation factor 3 subunit A	Eif3a
31.294	31.4209	31.4467	31.5363	31.2414	30.9656	31.3039	31.1044	1.20635	P23198;Q9DCC5	Chromobox protein homolog 3	Cbx3
NaN	NaN	NaN	NaN	27.5424	NaN	NaN	NaN	NaN	P23242	Gap junction alpha-1 protein	Gja1
26.9407	26.5612	27.064	27.1567	26.8899	26.5953	26.9682	26.8118	1.08249	P23475	X-ray repair cross-complementing protein 6	Xrcc6
32.1622	32.0558	32.0773	32.1162	32.1197	32.2825	32.2353	32.2107	0.927118	P23492;Q543K9;Q9D8C9	Purine nucleoside phosphorylase	Pnp;Pnp2
30.246	30.2934	30.5531	30.2969	30.1084	30.2488	29.8399	30.3289	1.16139	P23591	GDP-L-fucose synthase	Tsta3
29.0716	29.226	29.2145	29.1643	29.222	29.1356	29.4134	29.3628	0.923798	P23780	Beta-galactosidase	Glb1
31.5018	31.5038	31.5882	31.6284	32.0562	32.0703	31.9986	32.094	0.707487	P23927	Alpha-crystallin B chain	Cryab
NaN	NaN	26.6975	26.6308	26.8218	26.62	27.231	26.6782	0.886627	P23949	Zinc finger protein 36, C3H1 type-like 2	Zfp36l2
NaN	NaN	NaN	NaN	NaN	NaN	NaN	22.0385	NaN	P23950	Zinc finger protein 36, C3H1 type-like 1	Zfp36l1
32.4872	32.442	32.3897	32.502	32.1778	32.1407	32.4173	32.2257	1.16058	P24270	Catalase	Cat
30.1521	30.3792	30.0996	30.0946	30.4227	30.1163	29.9858	30.2544	0.990738	P24288;Q8CBC8;E9Q4K3	Branched-chain-amino-acid aminotransferase, cytosolic;Branched-chain-amino-acid aminotransferase	Bcat1
33.5638	33.6399	33.5457	33.5906	33.5945	33.5916	33.7597	33.5343	0.976015	P24369	Peptidyl-prolyl cis-trans isomerase B	Ppib
27.9334	NaN	27.8375	NaN	27.9701	27.5013	NaN	27.7482	1.10618	P24472	Glutathione S-transferase A4	Gsta4
32.0271	31.9807	31.9759	31.9973	31.8958	32.0794	32.051	32.1089	0.97365	P24527	Leukotriene A-4 hydrolase	Lta4h
31.6284	31.8162	31.7083	31.7089	31.5205	31.7107	31.4194	31.6276	1.10642	P24547	Inosine-5-monophosphate dehydrogenase 2	Impdh2
28.0992	28.049	28.199	28.2505	28.0882	28.1162	28.2117	28.0786	1.01801	P24638;B7ZCF5;B7ZCF4	Lysosomal acid phosphatase	Acp2
30.5211	30.496	30.6272	30.582	30.7485	30.8491	30.6545	30.7712	0.871003	P24668	Cation-dependent mannose-6-phosphate receptor	M6pr
28.5689	28.6765	28.4964	28.7626	28.3327	28.804	28.8702	28.6266	0.977877	P24788;A2A9P6;P24788-2	Cyclin-dependent kinase 11B	Cdk11b
29.8761	29.8512	29.8997	29.8825	29.4331	29.6724	29.69	29.2153	1.29655	P25085-2;A2AIU1;Q3TBV5;P25085	Interleukin-1 receptor antagonist protein	Il1rn
30.5586	30.5023	30.5188	30.5937	30.1858	30.1487	30.2434	30.232	1.26652	P25206	DNA replication licensing factor MCM3	Mcm3
27.372	27.444	27.6073	27.3417	26.8829	27.0621	27.2243	27.2971	1.25236	P25322	G1/S-specific cyclin-D1	Ccnd1
34.4211	34.5022	34.5093	34.5157	34.4947	34.5012	34.6625	34.4428	0.973852	P25444;D3YVC1;D3YWJ3;J3QMG5;L7N240;E9Q1N8;F6YTZ4;L7N453;J3QM94;D3Z536	40S ribosomal protein S2	Rps2;Gm5786;Gm18025;Gm6576;Gm8225
NaN	NaN	NaN	NaN	NaN	27.0914	NaN	27.0227	NaN	Q6PI17;P25785;B1AQJ3	Metalloproteinase inhibitor 2	Timp2
27.8622	27.9571	28.0979	27.8399	27.5538	27.922	27.5007	27.7881	1.18766	P25799;P25799-2;P25799-3;P25799-4	Nuclear factor NF-kappa-B p105 subunit;Nuclear factor NF-kappa-B p50 subunit	Nfkb1
NaN	29.2594	28.9295	28.868	NaN	NaN	NaN	29.4023	0.766664	P25911-2;P25911	Tyrosine-protein kinase Lyn	Lyn
36.2894	36.2707	36.3127	36.3105	36.3646	36.4028	36.4302	36.384	0.933308	P26039	Talin-1	Tln1
30.8336	30.8613	30.9451	30.8837	31.0076	30.8869	30.6689	30.9221	1.00664	P26040	Ezrin	Ezr
36.3816	36.474	36.4658	36.4112	36.5574	36.462	36.4358	36.5184	0.959098	P26041	Moesin	Msn
31.8618	31.9254	31.9179	31.9398	31.7568	31.8882	31.9901	31.7594	1.04435	P26043;Q7TSG6	Radixin	Rdx
25.1427	25.4393	NaN	NaN	25.4756	NaN	NaN	25.1443	0.986951	P26151	High affinity immunoglobulin gamma Fc receptor I	Fcgr1
NaN	NaN	NaN	NaN	NaN	25.5147	NaN	NaN	NaN	P26187	Methylated-DNA--protein-cysteine methyltransferase	Mgmt
32.8901	32.9149	32.8564	32.9296	32.8155	32.6833	32.9621	32.6822	1.08071	P26231	Catenin alpha-1	Ctnna1
32.7977	32.8991	32.7961	32.9088	32.894	32.8695	32.9359	32.8949	0.967176	P26350	Prothymosin alpha;Prothymosin alpha, N-terminally processed;Thymosin alpha	Ptma
31.1984	31.2178	31.2351	31.2514	31.0591	31.1311	31.2168	31.1444	1.06277	P26369;Q3KQM4	Splicing factor U2AF 65 kDa subunit	U2af2
33.3407	33.2684	33.3497	33.284	33.3334	33.3006	33.3649	33.4329	0.967779	P26443	Glutamate dehydrogenase 1, mitochondrial	Glud1
NaN	NaN	NaN	NaN	NaN	NaN	NaN	23.9902	NaN	P26450	Phosphatidylinositol 3-kinase regulatory subunit alpha	Pik3r1
31.8063	31.7462	31.7642	31.7957	31.7367	31.8019	31.8085	31.8222	0.990188	P26516	26S proteasome non-ATPase regulatory subunit 7	Psmd7
32.1047	32.1809	32.257	32.2275	32.1948	32.2012	32.1362	32.2367	1.00021	P26638;Q8C483;A2AFS0	Serine--tRNA ligase, cytoplasmic	Sars
31.9498	32.0178	31.9184	32.0535	32.2208	32.0654	32.3521	32.0032	0.885461	P26645	Myristoylated alanine-rich C-kinase substrate	Marcks
32.1042	32.2025	32.3808	32.171	31.8773	32.3318	32.2287	32.0997	1.0572	P26883;F6X9I3	Peptidyl-prolyl cis-trans isomerase FKBP1A;Peptidyl-prolyl cis-trans isomerase	Fkbp1a
30.8744	30.8156	30.9215	30.9186	31.8366	31.8089	31.8901	31.7421	0.522354	P27046	Alpha-mannosidase 2	Man2a1
30.6836	30.9068	30.7459	30.9792	30.7776	30.8014	30.7313	30.7505	1.04512	P27048;P63163	Small nuclear ribonucleoprotein-associated protein B;Small nuclear ribonucleoprotein-associated protein N	Snrpb;Snrpn
25.8894	NaN	25.8014	25.5714	25.4309	NaN	NaN	NaN	1.25107	P27090	Transforming growth factor beta-2;Latency-associated peptide	Tgfb2
34.0886	34.1382	34.0754	34.1617	34.2864	34.3409	34.4118	34.3308	0.854706	P27546;P27546-2;P27546-3;E9QPW8	Microtubule-associated protein 4	Map4
27.1802	NaN	26.9967	27.0609	26.6367	27.545	27.1742	26.859	1.01786	P27601	Guanine nucleotide-binding protein subunit alpha-13	Gna13
31.0174	31.0888	31.0919	31.0784	31.0844	31.1535	31.1285	31.1982	0.951302	P27612	Phospholipase A-2-activating protein	Plaa
25.97	26.0321	26.026	25.9983	25.7651	25.8573	26.0169	25.7258	1.12142	P27641	X-ray repair cross-complementing protein 5	Xrcc5
34.7073	34.7738	34.7326	34.6956	34.7945	34.7601	34.8179	34.8149	0.952952	P27659	60S ribosomal protein L3	Rpl3
31.1898	31.0182	31.1781	30.9632	31.0647	30.8468	29.9835	30.7529	1.3429	P27661	Histone H2AX	H2afx
36.0134	35.981	36.0035	35.989	36.0153	35.882	35.896	35.9588	1.04153	P27773	Protein disulfide-isomerase A3	Pdia3
28.0887	28.251	28.0098	27.8847	28.2177	27.4514	27.7507	28.0292	1.14576	P27808	Alpha-1,3-mannosyl-glycoprotein 2-beta-N-acetylglucosaminyltransferase	Mgat1
27.9037	27.9944	27.9715	28.2046	28.3105	28.0479	28.1937	28.0019	0.92022	P27870;Q8VDU4;E9PXI0	Proto-oncogene vav	Vav1
27.2924	26.984	27.3988	27.1375	27.8377	NaN	27.0571	NaN	0.844269	P28063;G3UZW8	Proteasome subunit beta type-8;Proteasome subunit beta type	Psmb8
30.0941	30.1783	30.1305	30.0695	30.4315	30.4845	30.4495	30.3043	0.812618	P28271	Cytoplasmic aconitate hydratase	Aco1
31.0789	30.9445	31.0296	30.9426	31.2709	30.9963	31.226	31.0119	0.915496	P28301	Protein-lysine 6-oxidase	Lox
30.6763	30.7634	30.7334	30.6848	30.6214	30.6342	30.5859	30.4629	1.10066	P28352;F6QA74;D3Z124	DNA-(apurinic or apyrimidinic site) lyase;DNA-(apurinic or apyrimidinic site) lyase, mitochondrial	Apex1
31.9457	31.9526	31.9509	31.9521	31.7947	31.8711	31.8667	31.8062	1.08346	P28474	Alcohol dehydrogenase class-3	Adh5
29.8196	29.7666	29.7977	30.7535	NaN	27.6182	NaN	NaN	5.33745	P28481;P28481-7;P28481-6;P28481-2;P28481-5;P28481-4;P28481-1	Collagen alpha-1(II) chain;Collagen alpha-1(II) chain;Chondrocalcin	Col2a1
31.3082	31.2798	31.351	31.3079	31.6322	31.5724	31.4855	31.4215	0.860845	P28653	Biglycan	Bgn
30.9725	30.9	30.9309	30.8693	31.0633	31.14	31.2283	31.2448	0.840357	P28658	Ataxin-10	Atxn10
29.2798	29.3676	29.238	29.2162	29.4341	29.5889	29.4733	29.6735	0.831017	P28659;P28659-4;P28659-2;P28659-3	CUGBP Elav-like family member 1	Celf1
30.3598	30.5694	30.3821	30.4787	30.277	30.1701	30.4182	29.6803	1.24065	P28667	MARCKS-related protein	Marcksl1
29.5266	29.6712	29.6684	29.621	29.46	29.5562	29.5394	29.7447	1.03292	P28740-2;P28740-1;P28740;E0CZ72;F8VQ42	Kinesin-like protein KIF2A	Kif2a
29.9011	29.5735	29.9655	29.6163	27.8778	29.5385	28.6878	29.3211	1.87618	P28798;Q3U9N4;H3BJE0	Granulins;Acrogranin;Granulin-1;Granulin-2;Granulin-3;Granulin-4;Granulin-5;Granulin-6;Granulin-7	Grn
30.0443	29.9886	29.9534	30.1072	29.8625	29.8608	29.9404	29.8943	1.09724	P28867;P28867-2;Q1MX43;Q1MX42;Q1MX41;Q1MX40	Protein kinase C delta type;Protein kinase C delta type regulatory subunit;Protein kinase C delta type catalytic subunit	Prkcd
30.1503	30.1764	30.3515	30.2177	29.7151	30.4927	29.7324	30.049	1.17014	P29268;H3BJW0	Connective tissue growth factor	Ctgf
33.946	33.8764	33.8936	33.8349	33.9386	33.9833	33.943	33.9317	0.958317	P29341	Polyadenylate-binding protein 1	Pabpc1
30.9147	30.8319	30.9527	30.9551	31.3568	31.3231	31.4666	31.0777	0.761835	P29351;P29351-2;P29351-3	Tyrosine-protein phosphatase non-receptor type 6	Ptpn6
28.1126	28.145	28.1111	28.0679	27.6087	27.8203	27.795	27.8283	1.2711	P29387	Guanine nucleotide-binding protein subunit beta-4	Gnb4
30.3677	30.1538	30.1059	30.2556	30.6137	30.2635	30.5383	30.4887	0.837813	P29416	Beta-hexosaminidase subunit alpha	Hexa
28.7275	28.674	28.6819	28.7928	29.6456	29.6418	29.5855	29.8072	0.517283	P29533;Q3UPN1;P29533-2	Vascular cell adhesion protein 1	Vcam1
30.6548	30.3922	30.7229	30.5814	30.25	30.8296	30.3384	30.2867	1.11857	P29595	NEDD8	Nedd8
32.7104	32.6918	32.6722	32.7429	32.8131	32.8299	32.858	32.8689	0.908684	P29758	Ornithine aminotransferase, mitochondrial	Oat
27.9821	27.9742	28.0804	28.0705	28.1289	28.0358	28.3947	28.0964	0.909314	P30204;P30204-2	Macrophage scavenger receptor types I and II	Msr1
NaN	NaN	NaN	NaN	NaN	NaN	NaN	24.4653	NaN	Q6P8J7;P30275	Creatine kinase S-type, mitochondrial;Creatine kinase U-type, mitochondrial	Ckmt2;Ckmt1
NaN	NaN	NaN	26.3239	NaN	NaN	NaN	NaN	NaN	P30276	G2/mitotic-specific cyclin-B2	Ccnb2
28.3882	28.3786	28.3573	28.4455	27.9599	28.0514	28.3726	27.8937	1.25093	P30280	G1/S-specific cyclin-D2	Ccnd2
30.3246	30.3202	30.392	30.4103	30.1498	30.355	30.4664	30.461	1.00259	P30285;E9Q9E4;E9PZX7	Cyclin-dependent kinase 4	Cdk4
28.2328	28.0862	28.272	28.1044	28.5739	28.1424	28.2684	NaN	0.898516	P30355	Arachidonate 5-lipoxygenase-activating protein	Alox5ap
31.9468	32.0148	31.9116	31.9982	31.8079	31.546	31.7521	31.7346	1.19557	P30412	Peptidyl-prolyl cis-trans isomerase C	Ppic
32.106	32.1713	32.0713	32.1949	32.0172	32.1835	32.1115	32.1509	1.01403	P30416;F6S2D5;D6RDE2	Peptidyl-prolyl cis-trans isomerase FKBP4;Peptidyl-prolyl cis-trans isomerase FKBP4, N-terminally processed;Peptidyl-prolyl cis-trans isomerase	Fkbp4
NaN	NaN	NaN	NaN	NaN	NaN	24.6792	NaN	NaN	P30561;Q3U5D9	Aryl hydrocarbon receptor	Ahr
NaN	NaN	NaN	NaN	NaN	NaN	NaN	25.9566	NaN	P30677	Guanine nucleotide-binding protein subunit alpha-14	Gna14
31.0447	30.7382	30.9165	31.0561	30.8413	31.2089	31.1075	31.3126	0.883499	P30681	High mobility group protein B2	Hmgb2
33.5929	33.6187	33.6334	33.6213	33.6099	33.5593	33.5192	33.6573	1.02112	P30999;G3X9V2;E9Q8Z8;E9Q8Z6;D3Z2H2;E9Q8Z4;E9Q8Z9;E9Q904;D3Z7H6;E9Q901;E9Q905;E9Q986;E9Q907;D3Z2H7	Catenin delta-1	Ctnnd1
NaN	NaN	NaN	NaN	NaN	NaN	NaN	25.494	NaN	P30999-3;P30999-2;E9Q8Z5;E9Q903;E9Q906	Catenin delta-1	Ctnnd1
24.4184	NaN	NaN	24.4584	32.0525	32.1374	31.2	32.1731	0.00570978	P31001	Desmin	Des
30.6369	30.6845	30.6432	30.6522	30.7086	30.889	30.6621	30.8183	0.92319	P31230;Q3UZG4	Aminoacyl tRNA synthase complex-interacting multifunctional protein 1;Endothelial monocyte-activating polypeptide 2	Aimp1
30.2871	30.3182	30.462	30.4743	30.191	30.2002	30.1536	30.2299	1.14213	P31324;H3BK84	cAMP-dependent protein kinase type II-beta regulatory subunit	Prkar2b
30.3953	30.4518	30.4373	30.4263	30.4088	30.3965	30.4498	30.3719	1.01461	P31750;D3Z783	RAC-alpha serine/threonine-protein kinase	Akt1
30.8059	30.5009	30.8351	30.7984	30.6489	30.7917	30.8943	30.9427	0.943226	P31786;F6WUQ1;Q4VWZ5;D3Z563	Acyl-CoA-binding protein	Dbi
31.8566	32.0377	31.9324	31.9917	32.0201	32.1341	32.0582	32.2334	0.896981	P31938	Dual specificity mitogen-activated protein kinase kinase 1	Map2k1
NaN	NaN	NaN	NaN	NaN	NaN	27.9605	28.2435	NaN	P31996;P31996-2	Macrosialin	Cd68
30.3151	30.3974	30.3969	30.3271	30.438	30.4107	30.5892	30.2672	0.954522	P32020;P32020-2	Non-specific lipid-transfer protein	Scp2
32.4775	32.4513	32.4675	32.4543	32.2616	32.4172	32.4837	32.4249	1.04667	P32067	Lupus La protein homolog	Ssb
30.0496	29.9012	29.9917	29.8988	29.8939	30.0833	30.1699	29.9719	0.953018	P32233	Developmentally-regulated GTP-binding protein 1	Drg1
29.7237	30.0825	30.0899	29.9917	NaN	29.1801	28.9289	28.9708	1.92566	P32261	Antithrombin-III	Serpinc1
NaN	NaN	NaN	25.7388	NaN	NaN	NaN	NaN	NaN	P32507;P32507-2	Nectin-2	Pvrl2
30.0092	29.9829	30.0326	29.9573	30.0296	29.8885	29.6875	29.5682	1.15033	P32883;P32883-2;C0H5X4	GTPase KRas;GTPase KRas, N-terminally processed	Kras;Hras
31.2501	31.246	31.2316	31.2193	31.2541	31.3208	31.3044	31.2494	0.969004	P32921;P32921-2	Tryptophan--tRNA ligase, cytoplasmic;T1-TrpRS;T2-TrpRS	Wars
NaN	NaN	NaN	NaN	NaN	NaN	NaN	25.6634	NaN	P33174	Chromosome-associated kinesin KIF4	Kif4
NaN	NaN	NaN	NaN	NaN	NaN	NaN	24.8927	NaN	P33215;P33215-2	Protein NEDD1	Nedd1
25.1372	25.2489	25.2348	25.1403	24.6814	NaN	NaN	24.7774	1.3764	P33434-2;P33434	72 kDa type IV collagenase;PEX	Mmp2
26.2063	26.0929	26.1274	26.3002	25.8374	26.1578	26.1072	25.7728	1.15902	P33610	DNA primase large subunit	Prim2
32.2892	32.5059	32.5243	32.4335	32.486	32.4628	32.3926	32.5994	0.967964	P34022;H7BX22	Ran-specific GTPase-activating protein	Ranbp1
29.0951	28.9249	29.0937	28.9731	28.9811	28.9048	28.9149	29.0595	1.04003	P34152;P34152-3;P34152-4;P34152-2;P34152-6;P34152-5	Focal adhesion kinase 1	Ptk2
32.9833	32.7193	32.8918	32.9639	32.938	33.0615	33.504	33.0443	0.842428	P34884	Macrophage migration inhibitory factor	Mif
27.0588	27.0638	27.2484	26.8329	26.2476	26.7343	26.8634	26.8081	1.30824	P34914;P34914-2	Bifunctional epoxide hydrolase 2;Cytosolic epoxide hydrolase 2;Lipid-phosphate phosphatase	Ephx2
29.5919	29.5991	29.519	29.5297	29.7875	29.7067	29.544	29.7773	0.905038	P35123	Ubiquitin carboxyl-terminal hydrolase 4	Usp4
30.867	30.9181	30.9399	30.8737	30.9188	30.7878	30.9178	30.8376	1.02397	P35235	Tyrosine-protein phosphatase non-receptor type 11	Ptpn11
31.37	31.0975	31.2633	31.2816	31.3507	31.4135	31.6326	31.4887	0.859593	P35278;Q8C266	Ras-related protein Rab-5C	Rab5c
31.9905	32.1611	32.137	32.0882	32.0905	31.9897	32.1773	31.9422	1.03116	P35279;P61294	Ras-related protein Rab-6A;Ras-related protein Rab-6B	Rab6a;Rab6b
NaN	NaN	NaN	NaN	NaN	24.4959	NaN	NaN	NaN	P35279-2;D3YV69	Ras-related protein Rab-6A	Rab6a
30.3253	30.2437	30.2923	30.3209	30.33	30.5251	30.5754	30.49	0.879908	P35282	Ras-related protein Rab-21	Rab21
26.212	26.0452	26.3619	26.2759	26.2946	25.5925	25.0328	26.0869	1.38708	P35285;A2ARZ7	Ras-related protein Rab-22A	Rab22a
31.1199	30.9549	30.9487	31.1027	31.2029	31.0865	31.1097	31.2335	0.915988	P35293	Ras-related protein Rab-18	Rab18
36.4527	36.4093	36.4405	36.4108	36.1812	36.1691	36.2063	36.1799	1.18444	P35441;Q80YQ1	Thrombospondin-1	Thbs1
29.4202	29.4248	29.5924	29.503	28.726	28.8829	28.5914	28.844	1.65178	P35456;P35456-2	Urokinase plasminogen activator surface receptor	Plaur
31.4236	31.3828	31.3609	31.448	31.1559	31.1634	31.3438	31.2009	1.13905	P35486	Pyruvate dehydrogenase E1 component subunit alpha, somatic form, mitochondrial	Pdha1
28.6599	28.7261	28.7194	28.7362	28.7086	28.7205	28.9586	28.585	0.977538	P35505	Fumarylacetoacetase	Fah
32.2802	32.3058	32.4041	32.3056	32.1789	32.0158	31.8559	32.0798	1.22376	P35550	rRNA 2-O-methyltransferase fibrillarin	Fbl
34.355	34.4299	34.3719	34.4925	34.4157	34.3617	34.5716	34.4895	0.967746	P35564	Calnexin	Canx
30.2099	30.0956	30.2114	30.2106	30.3052	30.527	30.5504	30.3853	0.83503	P35585	AP-1 complex subunit mu-1	Ap1m1
35.4719	35.5016	35.4833	35.4609	35.4581	35.3661	35.3754	35.4505	1.04746	P35700;B1AXW5;B1AXW6;B1AXW4	Peroxiredoxin-1	Prdx1
NaN	NaN	26.2609	26.3974	NaN	NaN	NaN	NaN	NaN	P35762	CD81 antigen	Cd81
29.5739	29.6972	29.4758	29.4999	29.3837	29.2054	29.4077	29.2761	1.18384	P35821	Tyrosine-protein phosphatase non-receptor type 1	Ptpn1
27.3241	27.0412	27.4345	27.2503	27.0758	27.0468	27.2187	26.6589	1.19953	P35831	Tyrosine-protein phosphatase non-receptor type 12	Ptpn12
NaN	26.9833	26.2305	NaN	27.9075	26.9132	27.343	27.101	0.611627	P35951	Low-density lipoprotein receptor	Ldlr
33.1236	33.0756	33.0851	32.9843	32.9651	33.4102	33.1684	33.3205	0.901938	P35979	60S ribosomal protein L12	Rpl12
33.1929	33.4554	33.4584	33.3979	33.4675	33.6833	33.8316	33.5816	0.832285	P35980;G3UZK4;G3UZJ6	60S ribosomal protein L18	Rpl18
NaN	22.6479	NaN	NaN	NaN	NaN	23.0146	NaN	0.775554	P36371	Antigen peptide transporter 2	Tap2
28.3393	27.9059	28.0834	28.544	27.7851	27.6015	28.1711	27.6633	1.33136	P36552	Oxygen-dependent coproporphyrinogen-III oxidase, mitochondrial	Cpox
27.2569	27.3565	27.393	27.6242	27.5489	27.5843	27.5823	28.1617	0.80572	P36916	Guanine nucleotide-binding protein-like 1	Gnl1
31.9605	32.006	32.0031	32.072	31.7966	31.9359	31.8851	31.9589	1.08393	P37040;Q05DV1	NADPH--cytochrome P450 reductase	Por
36.2047	36.2033	36.1286	36.2167	36.488	36.5113	36.4588	36.436	0.820628	P37804	Transgelin	Tagln
35.4489	35.3569	35.4676	35.4543	35.4875	35.7744	35.5778	35.7179	0.866052	P37889-2;P37889	Fibulin-2	Fbln2
27.1934	27.1245	27.0597	27.5038	26.8012	27.332	27.1209	27.3088	1.05674	P37913;Q3U4X8	DNA ligase 1;DNA ligase	Lig1
27.1426	27.0888	27.2705	27.2596	27.3654	27.1461	26.9957	27.3311	0.98678	P38060	Hydroxymethylglutaryl-CoA lyase, mitochondrial	Hmgcl
NaN	NaN	NaN	NaN	NaN	NaN	NaN	24.6714	NaN	P38585	Tubulin--tyrosine ligase	Ttl
34.3221	34.3665	34.377	34.4079	34.4668	34.5111	34.6169	34.5813	0.885369	P38647	Stress-70 protein, mitochondrial	Hspa9
NaN	NaN	NaN	NaN	26.3897	NaN	NaN	NaN	NaN	P39053;P39053-4;P39053-3;P39053-6;P39053-5;P39053-2	Dynamin-1	Dnm1
31.8513	31.8741	31.8929	31.9287	32.0029	32.0854	32.1053	32.0149	0.891697	P39054-2;P39054;Q3T9X3;F8WIV5;G3UZZ3	Dynamin-2	Dnm2
NaN	26.7515	26.9197	26.7419	26.7062	26.7672	27.3388	26.2836	1.02131	P39098;P39098-2	Mannosyl-oligosaccharide 1,2-alpha-mannosidase IB	Man1a2
NaN	28.0495	28.2439	28.2253	28.0336	28.1339	27.9486	27.8456	1.13483	P39689	Cyclin-dependent kinase inhibitor 1	Cdkn1a
28.915	28.478	28.4452	28.0761	28.2395	27.7803	27.8815	28.0717	1.3999	P39876	Metalloproteinase inhibitor 3	Timp3
35.124	35.1845	35.1806	35.1476	35.3421	35.4148	35.364	35.3684	0.862652	P40124	Adenylyl cyclase-associated protein 1	Cap1
34.6309	34.6082	34.6196	34.6458	34.7358	34.6207	34.5513	34.6632	0.988543	P40142	Transketolase	Tkt
27.9029	28.299	28.0258	28.0337	27.9947	28.9987	28.9855	28.496	0.681424	P40240	CD9 antigen	Cd9
30.2693	30.34	30.2847	30.2392	30.2028	30.3486	30.3302	30.1411	1.01933	P40336;P40336-2	Vacuolar protein sorting-associated protein 26A	Vps26a
27.3769	27.4171	27.2795	27.3957	27.5886	27.1864	27.2018	27.0497	1.07973	P40630;P40630-2;D3Z0F3	Transcription factor A, mitochondrial	Tfam
33.2828	33.1814	33.1892	33.2022	33.3052	33.4761	33.5724	33.5208	0.838147	P41105	60S ribosomal protein L28	Rpl28
29.4826	29.6191	29.6281	29.5892	29.7459	29.6394	29.8656	29.6761	0.900002	P41241	Tyrosine-protein kinase CSK	Csk
29.4205	NaN	NaN	29.3767	29.5679	NaN	30.1453	NaN	0.727995	P41731	CD63 antigen	Cd63
29.9933	30.2367	30.4047	30.312	30.0825	29.7865	29.7701	29.9194	1.27196	P42125	Enoyl-CoA delta isomerase 1, mitochondrial	Eci1
NaN	NaN	NaN	NaN	NaN	NaN	NaN	24.3454	NaN	P42128	Forkhead box protein K1	Foxk1
33.0395	32.9337	33.003	33.0625	32.9672	32.8585	32.8253	32.8599	1.09577	P42208;E9Q3V6;F6WYM0;D3YYB1;D3Z3C0	Septin-2	2015-09-02
28.5997	28.8794	28.771	28.2936	29.3423	28.5426	29.2639	28.8803	0.773059	P42225;Q8C3V4	Signal transducer and activator of transcription 1;Signal transducer and activator of transcription	Stat1
30.657	30.5108	30.6614	30.5972	30.8591	30.7731	30.8131	30.7378	0.877107	P42227;P42227-2;P42227-3;B7ZC18	Signal transducer and activator of transcription 3;Signal transducer and activator of transcription	Stat3
29.6861	29.5922	29.7641	29.5893	29.6741	29.337	29.9306	29.5048	1.03261	P42669	Transcriptional activator protein Pur-alpha	Pura
NaN	NaN	NaN	NaN	NaN	NaN	NaN	22.6803	NaN	P42867	UDP-N-acetylglucosamine--dolichyl-phosphate N-acetylglucosaminephosphotransferase	Dpagt1
34.2474	34.3205	34.2476	34.2917	34.3281	34.4469	34.415	34.4786	0.907299	P42932;H3BL49	T-complex protein 1 subunit theta	Cct8
29.2101	29.3998	29.4424	29.4548	29.7198	29.9071	29.5855	29.7219	0.780895	Q9DCW5;P43024	Cytochrome c oxidase subunit 6A, mitochondrial;Cytochrome c oxidase subunit 6A1, mitochondrial	Cox6a1
26.2509	26.4001	26.4123	26.4255	26.1435	26.2262	26.3666	26.2619	1.08873	P43247	DNA mismatch repair protein Msh2	Msh2
31.8422	31.5204	31.746	31.5073	30.3206	31.2886	31.1961	30.7775	1.69147	P43274	Histone H1.4	Hist1h1e
30.9898	30.9396	31.0132	31.1273	30.5812	30.6832	30.3227	30.8936	1.31704	P43275	Histone H1.1	Hist1h1a
33.5273	33.5264	33.6604	33.5273	33.5805	33.6217	33.2306	33.4539	1.06339	P43276	Histone H1.5	Hist1h1b
33.1359	32.9532	33.1265	32.8398	32.8774	32.8529	32.3705	32.7806	1.22561	P43277	Histone H1.3	Hist1h1d
25.7237	25.685	25.8564	26.0357	25.6471	25.0728	25.3875	25.1431	1.42659	P43346	Deoxycytidine kinase	Dck
31.941	31.92	31.9308	31.9957	31.7714	31.7332	31.8538	31.7336	1.12808	P43406;A2AKI5	Integrin alpha-V;Integrin alpha-V heavy chain;Integrin alpha-V light chain	Itgav
27.6937	27.6842	27.519	27.4508	27.5441	27.5484	27.7945	27.4361	1.00427	P43407	Syndecan-2	Sdc2
28.9827	29.1131	28.9243	28.0162	28.3931	28.5114	28.6183	28.9745	1.0979	P43883;B1AXR5	Perilipin-2	Plin2
32.9754	33.0355	33.0392	33.0571	32.7867	32.5975	32.6867	32.5855	1.28583	P45376	Aldose reductase	Akr1b1
31.2978	31.3155	31.3615	31.2643	31.2689	31.0645	31.3082	31.1419	1.08215	P45377	Aldose reductase-related protein 2	Akr1b8
30.872	30.9629	31.015	31.031	31.2019	31.029	31.3908	30.9895	0.881129	P45591	Cofilin-2	Cfl2
25.2187	25.0967	25.5808	25.0434	25.4475	26.0339	26.1575	26.0719	0.618652	P45700;D3Z799	Mannosyl-oligosaccharide 1,2-alpha-mannosidase IA	Man1a1;Man1a
28.5061	28.6853	28.6174	28.7534	28.4004	28.8939	28.9049	28.6491	0.951632	P45878	Peptidyl-prolyl cis-trans isomerase FKBP2	Fkbp2
30.6146	30.5018	30.6059	30.5937	30.6835	30.5806	30.9492	30.6165	0.914814	P45952	Medium-chain specific acyl-CoA dehydrogenase, mitochondrial	Acadm
31.885	31.8566	31.9428	31.9209	31.7545	31.8525	31.8227	31.7925	1.06864	P46061	Ran GTPase-activating protein 1	Rangap1
26.0636	26.1749	26.0763	NaN	NaN	NaN	NaN	NaN	NaN	P46414	Cyclin-dependent kinase inhibitor 1B	Cdkn1b
31.3956	31.2845	31.242	31.3511	31.421	31.5276	31.5114	31.5097	0.886305	P46460	Vesicle-fusing ATPase	Nsf
30.5595	30.4207	30.5108	30.4219	30.5427	30.5001	30.5345	30.5416	0.964933	P46467	Vacuolar protein sorting-associated protein 4B	Vps4b
32.661	32.4795	32.5817	32.5679	32.6096	32.636	32.7319	32.526	0.963696	P46471;Q8BVQ9	26S protease regulatory subunit 7	Psmc2
33.1271	33.061	33.0892	33.0495	33.1705	33.1498	33.2087	33.1808	0.935786	P46638;G3UZD3;G3UZL4	Ras-related protein Rab-11B	Rab11b
30.7166	30.826	30.7915	30.7227	30.8183	30.6198	30.3227	30.6212	1.12405	P46664	Adenylosuccinate synthetase isozyme 2	Adss
30.6022	30.6473	30.5864	30.5481	30.1099	30.2326	30.4101	30.1552	1.2915	P46735;Q7TQD7;E9QNH6;E9Q580;P46735-2	Unconventional myosin-Ib	Myo1b
27.0906	27.501	27.8171	27.92	27.4258	27.4917	27.4487	27.676	1.0509	P46737;A3KGA8;P46737-2	Lys-63-specific deubiquitinase BRCC36	Brcc3
33.2557	33.3492	33.3605	33.3945	33.8099	33.6735	33.6458	33.6667	0.779705	P46935	E3 ubiquitin-protein ligase NEDD4	Nedd4
29.523	29.4704	29.3765	29.3628	29.6291	29.7808	29.8095	29.7767	0.803378	P46938;P46938-2;G3UYW7;G3UYV4;G3UYA6;G3UY62	Yorkie homolog	Yap1
32.2147	32.1804	32.1938	32.1176	32.1289	31.9962	32.1967	32.0804	1.05415	P46978	Dolichyl-diphosphooligosaccharide--protein glycosyltransferase subunit STT3A	Stt3a
27.2695	27.4942	27.6818	27.5838	27.3669	27.0403	27.4677	27.5734	1.10592	P47199;D3YUG9;V9GXY8	Quinone oxidoreductase	Cryz
32.5924	32.7203	32.659	32.6826	32.6092	32.6483	32.5733	32.5968	1.04007	P47713;Q9DBX5	Cytosolic phospholipase A2;Phospholipase A2;Lysophospholipase	Pla2g4a
33.1943	33.1287	33.1387	33.1495	33.0535	33.0088	33.0317	33.0533	1.08371	P47738	Aldehyde dehydrogenase, mitochondrial	Aldh2
31.9715	32.2079	32.0272	32.1557	32.1825	32.0291	32.2037	32.1269	0.969307	P47754;D6RCW7	F-actin-capping protein subunit alpha-2	Capza2
32.8492	32.9666	32.9417	32.9246	32.9614	33.1247	33.2433	33.2236	0.85992	P47757-2;A2AMW0;P47757-4;P47757;F7CAZ6	F-actin-capping protein subunit beta	Capzb
29.7035	29.8582	29.7336	29.7329	29.6106	29.2168	29.2699	29.2516	1.33777	P47791;P47791-2	Glutathione reductase, mitochondrial	Gsr
29.5284	29.4645	29.478	29.4788	29.5374	29.5085	29.4101	29.4629	1.00535	P47809;B1ATL6	Dual specificity mitogen-activated protein kinase kinase 4	Map2k4
29.6884	29.6937	29.6576	29.5404	29.6942	29.6198	29.5595	29.7384	0.994505	P47811;P47811-3;B2KF35;P47811-2;B2KF34;P47811-4	Mitogen-activated protein kinase 14	Mapk14
31.9021	31.8563	31.8296	31.8497	31.7229	31.8235	31.927	31.776	1.03317	P47856;P47856-2	Glutamine--fructose-6-phosphate aminotransferase [isomerizing] 1	Gfpt1
29.0294	28.9708	28.9857	28.977	29.0198	29.0153	29.273	29.0173	0.939116	P47857	ATP-dependent 6-phosphofructokinase, muscle type	Pfkm
29.2677	29.2351	29.4345	29.4845	NaN	NaN	NaN	NaN	NaN	P47877;D3YU40	Insulin-like growth factor-binding protein 2	Igfbp2
34.6113	34.5601	34.5271	34.6158	34.5766	34.4728	34.5471	34.5656	1.02673	P47911;E9PUX4	60S ribosomal protein L6	Rpl6;Gm5428
NaN	NaN	NaN	NaN	25.3926	NaN	NaN	NaN	NaN	P47930;P47930-2	Fos-related antigen 2	Fosl2
29.5121	29.5552	29.7021	29.5968	29.6518	29.4237	29.5353	29.5539	1.03553	P47941	Crk-like protein	Crkl
32.7388	32.8779	32.9602	32.7772	32.8202	32.424	32.2946	32.6367	1.22659	P47955	60S acidic ribosomal protein P1	Rplp1
33.9918	33.9261	33.8994	33.9375	33.9266	33.9648	33.9988	33.9215	0.990188	P47962;D3YYV8	60S ribosomal protein L5	Rpl5
34.1078	34.0449	33.9603	34.1365	34.0849	33.7698	33.9208	33.9444	1.09612	P47963	60S ribosomal protein L13	Rpl13
NaN	NaN	NaN	25.0857	NaN	NaN	NaN	NaN	NaN	P47968	Ribose-5-phosphate isomerase	Rpia
30.3227	30.1984	30.1871	30.2125	30.2458	30.4657	30.4024	30.1563	0.941234	P48024;Q9CXU9	Eukaryotic translation initiation factor 1;Eukaryotic translation initiation factor 1b	Eif1;Eif1b
35.8021	35.7663	35.8649	35.7653	35.7049	35.6891	35.5627	35.716	1.09541	P48036	Annexin A5	Anxa5
NaN	NaN	NaN	NaN	NaN	NaN	NaN	23.084	NaN	P48410	ATP-binding cassette sub-family D member 1	Abcd1
31.228	31.1824	31.2052	31.2551	31.2447	31.2101	31.2944	31.2418	0.979369	P48428	Tubulin-specific chaperone A	Tbca
36.2391	36.1834	36.2201	36.2551	36.2667	36.2953	36.2449	36.2716	0.969155	P48678;P48678-2;P48678-3	Prelamin-A/C;Lamin-A/C	Lmna
27.6816	27.8278	27.7334	27.9447	27.6009	27.9062	28.1478	27.8593	0.94496	P48722;P48722-2;E0CY23	Heat shock 70 kDa protein 4L	Hspa4l
31.1763	31.1002	31.145	31.121	31.1356	30.9101	31.063	30.7077	1.13408	P48758	Carbonyl reductase [NADPH] 1	Cbr1
NaN	NaN	NaN	NaN	NaN	NaN	24.1846	NaN	NaN	P48760;P48760-4;P48760-2;P48760-5;P48760-3	Folylpolyglutamate synthase, mitochondrial	Fpgs
29.8647	29.6148	29.7476	29.7984	29.5491	29.5319	29.7115	29.5013	1.13518	P48771	Cytochrome c oxidase subunit 7A2, mitochondrial	Cox7a2
29.6954	29.6473	29.7223	29.6338	29.3202	29.505	29.2074	29.3297	1.26061	P48774;E9PVM7;E9PV63	Glutathione S-transferase Mu 5	Gstm5
34.7539	34.6697	34.7955	34.7599	34.5719	34.4585	34.4252	34.6127	1.17095	P48962	ADP/ATP translocase 1	Slc25a4
26.7255	26.6963	26.8635	26.7303	26.9125	NaN	26.9208	26.7253	0.933702	P49070	Calcium signal-modulating cyclophilin ligand	Camlg
29.2743	29.352	29.3736	29.4839	29.4384	29.3693	29.2263	29.3109	1.02436	P49138	MAP kinase-activated protein kinase 2	Mapkapk2
NaN	NaN	NaN	NaN	22.66	NaN	NaN	NaN	NaN	P49282;P49282-2;P49282-3;P49282-4	Natural resistance-associated macrophage protein 2	Slc11a2
34.1146	34.0373	34.1703	34.1205	34.0808	33.9538	33.8614	33.9371	1.11142	P49312;Q5EBP8;J3QK72;P49312-2	Heterogeneous nuclear ribonucleoprotein A1;Heterogeneous nuclear ribonucleoprotein A1, N-terminally processed	Hnrnpa1
27.387	27.489	27.4974	27.5172	27.3669	27.144	27.2976	NaN	1.15121	P49442;E0CYQ4;E0CX64;H3BK26	Inositol polyphosphate 1-phosphatase	Inpp1
27.9545	28.2517	28.2785	28.1784	28.2675	27.7766	28.5997	28.1908	0.970719	P49443	Protein phosphatase 1A	Ppm1a
27.4319	27.8654	27.7126	27.7006	27.7676	27.3989	27.4994	27.317	1.13438	P49586;Q811Q9;Q811Q9-2	Choline-phosphate cytidylyltransferase A;Choline-phosphate cytidylyltransferase B	Pcyt1a;Pcyt1b
28.7522	28.8784	28.7477	28.7988	28.8375	28.8545	28.8578	28.8514	0.961911	P49615	Cyclin-dependent-like kinase 5	Cdk5
30.148	30.3996	30.2682	30.438	30.5382	30.4274	30.2878	30.3699	0.937977	P49710	Hematopoietic lineage cell-specific protein	Hcls1
31.5742	31.5382	31.5098	31.5613	31.1419	31.2186	31.3008	31.1583	1.26661	P49717	DNA replication licensing factor MCM4	Mcm4
31.9604	31.8953	31.9746	31.9656	31.9651	31.7355	31.7421	31.8961	1.08243	P49722	Proteasome subunit alpha type-2	Psma2
32.439	32.24	32.3867	32.511	31.8716	32.1562	32.3197	32.1824	1.19889	P49817;H3BKG0;D3Z148;H3BLK5;P49817-2	Caveolin-1;Caveolin	Cav1
NaN	NaN	NaN	24.8873	NaN	NaN	NaN	NaN	NaN	P49919;P49919-2	Cyclin-dependent kinase inhibitor 1C	Cdkn1c
27.4071	27.4952	27.663	27.2657	27.5326	26.9844	27.3069	27.0807	1.17414	P49935	Pro-cathepsin H;Cathepsin H mini chain;Cathepsin H;Cathepsin H heavy chain;Cathepsin H light chain	Ctsh
28.7509	28.3583	28.7053	28.7493	28.4184	28.4245	27.8409	28.064	1.36983	P49962;D3YZX8	Signal recognition particle 9 kDa protein	Srp9
33.0309	32.9408	33.0218	33.0932	33.5177	33.3851	33.4782	33.4275	0.74203	P50247	Adenosylhomocysteinase	Ahcy
NaN	NaN	NaN	NaN	NaN	NaN	NaN	24.393	NaN	P50295	Arylamine N-acetyltransferase 2	Nat2
32.0243	31.8375	31.8045	31.8412	31.9148	31.9382	31.8603	31.928	0.977081	P50396	Rab GDP dissociation inhibitor alpha	Gdi1
27.0199	26.8837	27.4088	27.3876	27.0219	27.1453	27.1571	27.4352	0.989742	P50427	Steryl-sulfatase	Sts
NaN	26.9094	NaN	26.4901	NaN	NaN	26.8595	26.7648	0.925048	P50428	Arylsulfatase A	Arsa
27.6485	27.4394	27.7371	27.7062	27.7536	27.2808	27.8206	27.4326	1.04312	P50429;P50429-2	Arylsulfatase B	Arsb
32.1884	32.0664	32.1143	32.0466	32.2059	32.1462	32.3568	32.2523	0.909802	P50516;P50516-2	V-type proton ATPase catalytic subunit A	Atp6v1a
29.6697	29.5203	29.5587	29.575	29.6692	29.6897	29.639	29.5117	0.968299	P50518	V-type proton ATPase subunit E 1	Atp6v1e1
33.8437	33.87	33.8933	33.8112	33.9554	33.9292	33.7677	33.8344	0.9882	P50543	Protein S100-A11	S100a11
31.254	31.1842	31.21	31.2715	31.3553	31.4306	31.6	31.3436	0.869073	P50544;B1AR28	Very long-chain specific acyl-CoA dehydrogenase, mitochondrial	Acadvl
32.6544	32.7113	32.706	32.6061	32.6382	32.763	32.8315	32.6868	0.958982	P50580;D3YVH7	Proliferation-associated protein 2G4	Pa2g4
28.7815	28.788	28.9812	28.6804	28.6206	29.1782	29.159	29.164	0.856975	P50637	Translocator protein	Tspo
32.5985	32.6449	32.5694	32.5988	32.8132	32.8222	32.9038	32.8177	0.848905	P51125;P51125-3;P51125-2;Q8CE80;P51125-6;P51125-7;P51125-5;P51125-4	Calpastatin	Cast
32.5491	32.4342	32.5313	32.5161	32.6527	32.5499	32.5757	32.5576	0.948487	P51150	Ras-related protein Rab-7a	Rab7a
NaN	NaN	NaN	NaN	24.726	NaN	NaN	NaN	NaN	P51163;Q3TPL3	Uroporphyrinogen-III synthase	Uros
31.3735	31.2313	31.2694	31.327	31.3459	31.2698	31.3401	31.3945	0.974494	P51174	Long-chain specific acyl-CoA dehydrogenase, mitochondrial	Acadl
26.4572	26.7799	26.6967	26.8669	26.8655	26.8881	26.8792	26.6827	0.914655	P51175	Protoporphyrinogen oxidase	Ppox
32.8819	32.7503	32.6969	32.8068	32.7197	32.8365	32.8185	32.6494	1.01956	P51410;D3Z629	60S ribosomal protein L9	Rpl9
29.76	29.7439	29.8957	29.7387	29.8506	30.0436	30.1255	29.9874	0.860233	P51432	1-phosphatidylinositol 4,5-bisphosphate phosphodiesterase beta-3	Plcb3
27.9672	28.1355	28.311	28.1694	27.7177	27.7085	27.5304	27.5941	1.42218	P51480;P51480-2	Cyclin-dependent kinase inhibitor 2A, isoforms 1/2	Cdkn2a
26.889	27.5023	27.1992	27.117	27.5223	27.6087	27.2665	27.2035	0.856559	P51569;Q8BGZ6	Alpha-galactosidase A	Gla
32.2168	32.2875	32.2974	32.3485	32.2761	32.1492	32.2863	32.285	1.02697	P51655	Glypican-4;Secreted glypican-4	Gpc4
31.7151	31.709	31.6525	31.7386	31.7739	31.8128	31.8367	31.8743	0.919789	P51660	Peroxisomal multifunctional enzyme type 2;(3R)-hydroxyacyl-CoA dehydrogenase;Enoyl-CoA hydratase 2	Hsd17b4
29.5315	29.3389	29.5386	29.5187	29.3333	29.6017	29.4585	29.751	0.963128	P51807	Dynein light chain Tctex-type 1	Dynlt1
30.2915	30.1396	30.2126	30.1803	30.4092	30.3441	30.4031	30.3817	0.883606	P51855;Q3UEE2	Glutathione synthetase	Gss
31.5921	31.4336	31.5343	31.6196	31.582	31.6089	32.0075	31.6907	0.884311	P51859;E0CXA0	Hepatoma-derived growth factor	Hdgf
29.976	29.9379	30.0152	29.8596	30.1274	30.2375	30.3598	30.1427	0.829506	P51863	V-type proton ATPase subunit d 1	Atp6v0d1
32.6404	32.5739	32.5938	32.5837	32.5089	32.2248	32.4309	32.2747	1.17946	P51881	ADP/ATP translocase 2;ADP/ATP translocase 2, N-terminally processed	Slc25a5
NaN	NaN	24.6982	NaN	NaN	NaN	NaN	NaN	NaN	P51943;D6RIK7	Cyclin-A2	Ccna2
NaN	NaN	NaN	NaN	NaN	NaN	NaN	NaN	NaN	P51949	CDK-activating kinase assembly factor MAT1	Mnat1
25.2747	25.2657	25.1406	25.4724	26.0217	26.1963	25.4477	25.8573	0.663239	P52019;Q3TSS7	Squalene monooxygenase	Sqle
30.9826	30.9194	30.958	31.0234	30.6551	30.8379	30.665	30.783	1.1774	P52293	Importin subunit alpha-1	Kpna2
26.3419	26.376	26.3376	26.2924	26.33	26.3591	26.004	26.3187	1.05997	P52432;D3Z3D6;G3UXX5;D3Z7Q8	DNA-directed RNA polymerases I and III subunit RPAC1	Polr1c
27.6629	27.5919	27.5316	27.4369	27.4477	27.2405	27.8068	27.6588	1.01212	P52479;P52479-2	Ubiquitin carboxyl-terminal hydrolase 10	Usp10
36.5044	36.4991	36.4704	36.4934	36.6695	36.7401	36.6807	36.6552	0.873845	P52480	Pyruvate kinase PKM	Pkm
30.6987	30.8553	30.8095	30.5996	31.6392	31.5318	31.5314	31.3521	0.58526	P52480-2	Pyruvate kinase PKM	Pkm
27.2148	27.4458	27.3257	27.362	26.9903	26.5968	26.9872	26.7675	1.41581	P52482;P52483;Q91W82;H3BL23;H3BL69;D3YXD1	Ubiquitin-conjugating enzyme E2 E1;Ubiquitin-conjugating enzyme E2 E3;Ubiquitin-conjugating enzyme E2 E2	Ube2e1;Ube2e3;Ube2e2
29.3979	29.5665	29.5378	29.5249	29.3856	28.9569	29.2732	29.0329	1.26982	P52503	NADH dehydrogenase [ubiquinone] iron-sulfur protein 6, mitochondrial	Ndufs6
28.1453	28.0331	28.2737	28.1833	28.4203	28.3775	28.4065	28.2795	0.86328	P52633	Signal transducer and transcription activator 6	Stat6
NaN	27.0881	NaN	27.4583	NaN	NaN	27.3984	27.4269	0.907865	P52760	Ribonuclease UK114	Hrsp12
25.7509	26.2586	26.1182	25.819	25.5066	25.8787	NaN	25.8183	1.19097	P52795	Ephrin-B1	Efnb1
25.8429	25.8772	25.6238	25.9358	NaN	25.4959	25.25	25.6678	1.27341	P52800	Ephrin-B2	Efnb2
29.1519	29.2254	29.1658	29.1018	29.1946	29.2573	29.1435	29.3408	0.950774	P52825	Carnitine O-palmitoyltransferase 2, mitochondrial	Cpt2
28.2245	28.4519	28.215	28.4269	28.5582	28.711	28.511	28.6194	0.829133	P52875;D3YV67	Transmembrane protein 165	Tmem165
32.0456	32.2341	32.0328	32.0421	32.4665	32.446	32.3353	32.4666	0.790069	P52927;Q6NSP9	High mobility group protein HMGI-C	Hmga2
28.0624	27.6453	28.0104	27.8353	27.8654	28.0779	28.5615	27.8862	0.864897	P53395	Lipoamide acyltransferase component of branched-chain alpha-keto acid dehydrogenase complex, mitochondrial	Dbt
NaN	26.3664	25.8153	25.4709	NaN	NaN	NaN	25.5837	1.23157	P53569;P53569-2	CCAAT/enhancer-binding protein zeta	Cebpz
26.4648	26.39	26.5553	26.5929	26.1902	27.0412	26.7833	26.5713	0.903909	Q3TVF4;P53612	Geranylgeranyl transferase type-2 subunit beta	Rabggtb
29.787	29.6874	29.7976	29.4567	29.7681	30.2041	29.0206	29.7271	1.00153	P53690	Matrix metalloproteinase-14	Mmp14
25.4124	NaN	NaN	NaN	NaN	NaN	NaN	NaN	NaN	P53702	Cytochrome c-type heme lyase	Hccs
24.6998	NaN	24.6888	24.4925	24.9873	25.8009	24.6589	25.534	0.651464	P53798	Squalene synthase	Fdft1
31.8382	31.8982	31.9001	31.9104	31.9305	31.9265	32.0695	31.9871	0.938433	P53810;J3QQ30;J3QPW1	Phosphatidylinositol transfer protein alpha isoform	Pitpna
30.3748	30.3491	30.4067	30.4485	30.355	30.5665	30.4201	30.3576	0.979403	P53811	Phosphatidylinositol transfer protein beta isoform	Pitpnb
NaN	NaN	NaN	NaN	NaN	24.2179	NaN	NaN	NaN	P53986	Monocarboxylate transporter 1	Slc16a1
32.1035	32.0425	32.0682	32.0205	32.2682	32.1373	32.1907	32.2842	0.894141	P53994	Ras-related protein Rab-2A	Rab2a
28.8954	29.0102	29.0569	28.9436	28.9374	28.9572	28.8254	28.905	1.04992	P53995;A2ATQ5	Anaphase-promoting complex subunit 1	Anapc1
30.8702	31.1628	31.0625	31.018	30.1859	31.0125	30.8559	30.7178	1.26168	P53996	Cellular nucleic acid-binding protein	Cnbp
NaN	NaN	NaN	NaN	NaN	NaN	NaN	27.1321	NaN	P53996-2;P53996-3;D3YYF6	Cellular nucleic acid-binding protein	Cnbp
32.5428	32.5695	32.6628	32.6462	32.2779	32.2937	32.2013	32.3118	1.26063	P54071	Isocitrate dehydrogenase [NADP], mitochondrial	Idh2
29.2273	29.0713	29.2849	29.1066	29.7036	29.4806	29.3587	29.5498	0.784231	P54116	Erythrocyte band 7 integral membrane protein	Stom
31.9342	31.9662	31.9686	31.922	31.6235	31.3331	31.5875	31.3863	1.38046	P54227;D3Z1Z8;D3Z5N2	Stathmin	Stmn1
27.2082	27.188	27.4619	27.1038	27.4424	27.4676	27.3162	27.2112	0.920905	P54276	DNA mismatch repair protein Msh6	Msh6
NaN	NaN	NaN	NaN	NaN	NaN	NaN	25.6095	NaN	P54320	Elastin	Eln
28.0778	28.2249	28.0918	28.2886	28.2675	28.0865	28.7184	28.2831	0.890014	P54726;Q3TN85;Q8CAP3	UV excision repair protein RAD23 homolog A	Rad23a
31.7587	31.7103	31.7735	31.711	31.7944	32.1814	31.9214	31.8862	0.866052	P54728	UV excision repair protein RAD23 homolog B	Rad23b
28.7855	29.1135	29.015	29.0375	29.0521	29.2555	29.2528	29.14	0.878293	P54729	NEDD8 ultimate buster 1	Nub1
28.829	28.6646	28.7167	28.8688	28.7326	29.0103	28.8243	28.9104	0.933276	P54731	FAS-associated factor 1	Faf1
32.4845	32.33	32.3655	32.399	32.4302	32.5234	32.5733	32.5472	0.917783	P54775	26S protease regulatory subunit 6B	Psmc4
26.76	26.4353	26.7285	26.6664	26.7178	NaN	NaN	NaN	0.952473	P54818	Galactocerebrosidase	Galc
30.4822	30.4847	30.7045	30.5523	30.4954	30.5384	30.6409	30.4441	1.01834	P54822;E9Q242;E9Q3T7	Adenylosuccinate lyase	Adsl
31.0151	30.9672	30.9607	30.9646	30.981	30.8865	30.9188	30.8373	1.05044	P54823	Probable ATP-dependent RNA helicase DDX6	Ddx6
30.5608	30.5057	30.5848	30.4897	30.7821	30.5665	30.6837	30.4771	0.938156	P54923	[Protein ADP-ribosylarginine] hydrolase	Adprh
NaN	NaN	NaN	NaN	27.1124	NaN	NaN	NaN	NaN	Q99PM0;P55002	Microfibrillar-associated protein 2	Mfap2
29.0265	28.9782	29.1574	29.0138	29.1581	28.8056	28.9074	29.2191	1.01496	P55096	ATP-binding cassette sub-family D member 3	Abcd3
30.166	29.9749	30.2921	30.2677	30.246	30.0943	30.1036	30.0406	1.03818	P55258	Ras-related protein Rab-8A	Rab8a
31.2443	31.3176	31.225	31.2382	31.5127	31.8378	31.8142	31.7405	0.721952	P55264	Adenosine kinase	Adk
25.5035	25.5705	25.6014	25.4903	25.8405	26.2371	NaN	26.3487	0.659445	P55264-2	Adenosine kinase	Adk
NaN	NaN	NaN	NaN	26.4624	26.4711	26.824	26.1944	NaN	P55271	Cyclin-dependent kinase 4 inhibitor B	Cdkn2b
30.3959	30.3543	30.4174	30.3905	30.4951	30.4155	30.5126	30.438	0.948832	P55288	Cadherin-11	Cdh11
31.3548	31.4244	31.3133	31.3591	31.56	31.5298	31.6127	31.4033	0.892825	P55302	Alpha-2-macroglobulin receptor-associated protein	Lrpap1
NaN	NaN	NaN	NaN	NaN	NaN	NaN	28.7838	NaN	P55821	Stathmin-2	Stmn2
29.305	29.1856	29.2708	29.3346	29.3355	28.7251	29.0163	29.1336	1.16584	P56135;F8WHP8	ATP synthase subunit f, mitochondrial	Atp5j2
26.2415	26.4549	26.2761	26.2703	25.9578	26.3997	26.3336	26.3151	1.04185	P56183;P56183-2;P56183-3	Ribosomal RNA processing protein 1 homolog A	Rrp1
29.5009	29.235	29.3778	29.6525	29.4738	29.3935	29.273	29.3415	1.05052	P56212;E9Q827;P56212-2	cAMP-regulated phosphoprotein 19	Arpp19
NaN	NaN	NaN	NaN	NaN	27.3983	27.1308	27.4426	NaN	P56213	FAD-linked sulfhydryl oxidase ALR	Gfer
25.9813	NaN	25.939	NaN	NaN	NaN	NaN	NaN	NaN	P56375	Acylphosphatase-2	Acyp2
27.3448	27.5025	27.3696	27.3787	27.5798	27.2099	27.6351	27.8085	0.895382	P56376;E9QJT5	Acylphosphatase-1;Acylphosphatase	Acyp1
NaN	26.9533	NaN	28.7757	28.4964	NaN	NaN	28.6556	0.610685	P56379	6.8 kDa mitochondrial proteolipid	Mp68
27.6581	27.9902	27.8368	27.6651	27.6556	27.5756	27.7207	27.5879	1.11157	P56380	Bis(5-nucleosyl)-tetraphosphatase [asymmetrical]	Nudt2
29.4613	29.3225	29.2378	29.2529	28.9417	28.3292	28.44	28.9728	1.56667	P56382	ATP synthase subunit epsilon, mitochondrial	Atp5e
27.9933	27.8819	27.7111	27.7229	27.6623	27.4994	27.5113	27.4651	1.22499	P56387	Dynein light chain Tctex-type 3	Dynlt3
NaN	NaN	NaN	NaN	NaN	25.8389	NaN	NaN	NaN	P56390	Cyclin-dependent kinases regulatory subunit 2	Cks2
30.0152	30.02	30.021	30.0709	29.815	29.8815	29.9975	29.9365	1.08987	P56391	Cytochrome c oxidase subunit 6B1	Cox6b1
29.9728	NaN	NaN	29.7925	NaN	NaN	NaN	NaN	NaN	P56393	Cytochrome c oxidase subunit 7B, mitochondrial	Cox7b
27.2968	27.5868	27.4701	27.5631	27.3555	27.7358	27.8364	27.315	0.945091	P56394	Cytochrome c oxidase copper chaperone	Cox17
32.1661	32.196	32.1152	32.2121	32.1313	32.2926	32.3907	32.3232	0.92524	P56399;Q3U4W8	Ubiquitin carboxyl-terminal hydrolase 5;Ubiquitin carboxyl-terminal hydrolase	Usp5
35.02	34.9212	34.9325	34.9598	34.9137	34.8882	34.8328	34.9145	1.0505	P56480	ATP synthase subunit beta, mitochondrial	Atp5b
29.7923	29.9441	29.7836	29.7007	29.9552	29.7169	29.7852	29.6905	1.01271	P56546;Q91YZ2;P56546-2;E9PWQ9	C-terminal-binding protein 2	Ctbp2
27.6147	27.8449	27.7409	27.7405	27.798	27.804	28.0745	27.7349	0.92172	P56695;Q3UN10	Wolframin	Wfs1
30.4814	30.3533	30.3891	30.4374	30.2642	30.1678	30.2569	30.2458	1.13416	P56812;D3Z7Q5	Programmed cell death protein 5	Pdcd5
NaN	NaN	NaN	NaN	NaN	NaN	NaN	26.6481	NaN	P56873;E0CYU9	Sjoegren syndrome/scleroderma autoantigen 1 homolog	Sssca1
32.0788	32.0154	32.0425	32.1035	32.0498	32.0172	31.948	32.0031	1.03924	P56959;Q8CFQ9;G3UXT7	RNA-binding protein FUS	Fus
26.8126	26.6389	26.7538	26.8899	27.1625	27.0099	27.0871	NaN	0.805134	P56960;F6VYQ6;Q8K366	Exosome component 10	Exosc10
29.6914	29.7326	29.7418	29.7482	29.4865	29.7572	29.9492	29.6492	1.01254	P57716	Nicastrin	Ncstn
NaN	NaN	NaN	NaN	NaN	NaN	NaN	24.4831	NaN	P57722;P57722-2;E9Q7D8	Poly(rC)-binding protein 3	Pcbp3
26.5865	26.2758	26.3486	26.4108	26.3068	26.7383	26.5243	26.4408	0.934894	P57724	Poly(rC)-binding protein 4	Pcbp4
28.2452	28.3725	28.4093	28.2646	28.7927	28.3673	28.2654	28.4538	0.903189	P57746	V-type proton ATPase subunit D	Atp6v1d
31.4934	31.4178	31.4334	31.421	31.5032	31.4186	31.6477	31.6773	0.919996	P57759	Endoplasmic reticulum resident protein 29	Erp29
NaN	NaN	NaN	NaN	NaN	NaN	NaN	26.5567	NaN	P57776;P57776-3;P57776-2	Elongation factor 1-delta	Eef1d
35.3512	35.4496	35.3775	35.3975	35.3642	35.4653	35.4861	35.511	0.957471	P57780;E9Q2W9	Alpha-actinin-4	Actn4
30.1879	30.0229	30.1995	30.2432	29.9204	30.1927	30.0902	30.1617	1.05126	P57784;G5E883	U2 small nuclear ribonucleoprotein A	Snrpa1
NaN	NaN	NaN	NaN	NaN	NaN	NaN	27.0068	NaN	P57787;B1ATM1;B1ATM2	Monocarboxylate transporter 4	Slc16a3
30.8846	31.0465	30.8469	30.7913	31.076	30.8929	30.859	30.7279	1.00234	P58021;E9PZ69	Transmembrane 9 superfamily member 2	Tm9sf2
30.2266	30.0901	30.1545	30.0951	30.3581	30.4803	30.5704	30.2711	0.824505	P58022-2;P58022	Lysyl oxidase homolog 2	Loxl2
29.4233	29.3841	29.3288	29.4025	30.1408	30.1815	30.3345	30.2932	0.553699	P58044;G3XA48	Isopentenyl-diphosphate Delta-isomerase 1	Idi1
27.5846	27.9241	27.7752	27.5522	27.7985	27.7133	28.0189	27.9896	0.888196	P58064	28S ribosomal protein S6, mitochondrial	Mrps6
NaN	NaN	NaN	NaN	NaN	NaN	NaN	22.6379	NaN	P58069	Ras GTPase-activating protein 2	Rasa2
36.3969	36.3906	36.4413	36.4137	36.4419	36.5039	36.3602	36.476	0.976116	P58252	Elongation factor 2	Eef2
28.0925	28.2751	28.2665	28.0173	28.1504	28.154	28.5304	28.1229	0.948306	P58281;P58281-2;H7BX01;E0CXD1	Dynamin-like 120 kDa protein, mitochondrial;Dynamin-like 120 kDa protein, form S1	Opa1
NaN	NaN	NaN	NaN	NaN	21.024	NaN	NaN	NaN	P58334	Krueppel-like factor 16	Klf16
30.7466	30.6748	30.5932	30.6235	30.6598	30.5135	30.4151	30.6337	1.07475	P58389;A2AWE9	Serine/threonine-protein phosphatase 2A activator	Ppp2r4
27.6167	27.3752	27.5131	27.5012	27.4991	27.2323	27.1332	27.1134	1.19503	P58404;P58404-2	Striatin-4	Strn4
NaN	NaN	NaN	NaN	NaN	26.1765	26.0192	26.2777	NaN	P58468	Protein FAM207A	Fam207a
27.7733	27.8653	27.8981	27.9071	27.5927	27.8677	27.7506	27.8244	1.07333	P58742	Aladin	Aaas
27.7286	27.5984	27.5236	27.6855	27.4256	27.5493	27.5097	27.4605	1.10784	P58771;Q8BSH3;E9Q452;E9Q454;S4R2U0	Tropomyosin alpha-1 chain	Tpm1
NaN	NaN	NaN	NaN	NaN	NaN	NaN	25.6471	NaN	P58771-2	Tropomyosin alpha-1 chain	Tpm1
30.2944	30.4732	30.4023	30.4916	29.7449	29.9925	30.3051	30.2013	1.27848	P58774	Tropomyosin beta chain	Tpm2
34.6037	34.5233	34.5546	34.4495	35.0242	34.9308	35.1031	35.0065	0.715302	P58774-2	Tropomyosin beta chain	Tpm2
28.2046	28.4383	28.2163	28.4857	27.8964	28.1146	28.0945	28.2327	1.19059	P58801;V9GXY4	Receptor-interacting serine/threonine-protein kinase 2	Ripk2
26.1222	26.0852	26.0746	26.1766	26.0436	NaN	NaN	NaN	1.05048	P58854;E9Q0R3	Gamma-tubulin complex component 3	Tubgcp3
31.6734	31.713	31.6425	31.7116	31.8288	31.8097	31.8477	31.8522	0.901578	P58871;Z4YJL4	182 kDa tankyrase-1-binding protein	Tnks1bp1
25.9578	25.6504	25.8054	25.709	25.8446	NaN	26.1246	25.9447	0.876211	P59016	Vacuolar protein sorting-associated protein 33B	Vps33b
28.4967	28.2241	28.4719	28.4143	28.2122	27.7572	28.1564	27.9633	1.30087	P59017	Bcl-2-like protein 13	Bcl2l13
27.154	27.0938	27.1262	27.0639	NaN	26.9199	26.6834	27.0649	1.16479	P59024;D3YWB6	Peptidyl-prolyl cis-trans isomerase FKBP14	Fkbp14
26.5555	26.4621	26.3494	26.1829	26.2629	26.5228	26.5533	26.2996	0.984747	P59108	Copine-2	Cpne2
NaN	25.4649	25.5278	NaN	25.5432	NaN	25.341	NaN	1.03832	P59222	Scavenger receptor class F member 2	Scarf2
27.295	27.2505	27.4033	27.5245	27.1478	27.5472	27.9783	27.6866	0.857584	P59235	Nucleoporin Nup43	Nup43
NaN	NaN	NaN	NaN	NaN	NaN	20.2646	NaN	NaN	P59266	Fat storage-inducing transmembrane protein 2	Fitm2
31.0645	31.1305	31.1888	31.1261	31.0335	31.2394	31.1949	31.1466	0.982055	P59325	Eukaryotic translation initiation factor 5	Eif5
NaN	NaN	NaN	NaN	24.8891	NaN	NaN	NaN	NaN	P59672;Q3UHP6;P59672-2	Ankyrin repeat and SAM domain-containing protein 1A	Anks1a;Anks1
29.2219	29.0202	29.2924	28.9966	28.8146	28.9205	28.7301	29.0732	1.1877	P59708	Splicing factor 3B subunit 6	Sf3b6
32.4201	32.5399	32.4971	32.3701	32.6872	32.8483	32.8189	32.7598	0.800099	P59999	Actin-related protein 2/3 complex subunit 4	Arpc4
28.5397	29.0522	28.6106	28.5485	28.3849	28.5683	28.8448	28.4099	1.09868	P60060;G3UWH0	Protein transport protein Sec61 subunit gamma	Sec61g
31.1236	31.1416	31.0735	30.9911	30.9646	31.0148	31.1	31.1102	1.02459	P60122	RuvB-like 1	Ruvbl1
31.4994	31.562	31.5828	31.5704	31.6252	31.911	31.8576	31.7434	0.852251	P60229	Eukaryotic translation initiation factor 3 subunit E	Eif3e
32.1518	32.0362	32.2339	32.1304	31.973	31.9573	31.8954	31.9269	1.14864	P60335	Poly(rC)-binding protein 1	Pcbp1
NaN	26.0662	25.9958	25.5574	NaN	26.4714	NaN	27.0777	0.535361	P60603	Reactive oxygen species modulator 1	Romo1
26.0857	NaN	25.8864	NaN	25.7925	NaN	25.7945	NaN	1.14278	P60605;G3UZX2	Ubiquitin-conjugating enzyme E2 G2	Ube2g2
29.9503	29.8976	30.0491	30.0387	29.9971	29.7957	30.0394	29.7992	1.05415	P60670;P60670-2	Nuclear protein localization protein 4 homolog	Nploc4
32.0633	31.8097	31.7839	31.7754	31.2666	31.5298	31.5778	31.7047	1.26431	P60710;E9Q1F2;E9Q5F4	Actin, cytoplasmic 1;Actin, cytoplasmic 1, N-terminally processed	Actb
26.2593	26.4261	26.6625	26.5398	25.7909	25.534	25.8102	25.792	1.67035	P60762;P60762-2	Mortality factor 4-like protein 1	Morf4l1
32.3779	32.3139	32.4274	32.3021	32.4075	32.3333	32.494	32.3233	0.976573	P60766;P60766-1	Cell division control protein 42 homolog	Cdc42
26.5296	26.752	26.9525	26.3964	26.5721	26.5818	26.2621	26.6987	1.0935	P60824;D3YU80;K4DI65	Cold-inducible RNA-binding protein	Cirbp
27.5445	27.5546	27.4843	27.6904	27.5207	27.8266	27.1382	27.5678	1.03895	P60840;P60840-2;P60840-3	Alpha-endosulfine	Ensa
35.0393	35.1174	35.0808	35.1038	34.9951	35.0757	34.9628	35.0563	1.04453	P60843	Eukaryotic initiation factor 4A-I	Eif4a1
32.7343	32.8031	32.817	32.6418	32.7932	33.0226	32.9515	33.3213	0.827539	P60867	40S ribosomal protein S20	Rps20
27.3969	27.2566	27.4755	27.5486	27.4273	27.4057	27.724	27.5303	0.931466	P61021	Ras-related protein Rab-5B	Rab5b
31.2123	31.3393	31.4108	31.3441	31.2011	31.3764	31.2718	31.4513	1.00102	P61027	Ras-related protein Rab-10	Rab10
28.2903	28.2522	28.5142	28.555	28.4952	28.7076	29.1228	28.8268	0.765686	P61028	Ras-related protein Rab-8B	Rab8b
30.0851	30.2381	29.8533	29.8414	30.0541	30.0024	30.054	30.2115	0.948668	P61079;P62838	Ubiquitin-conjugating enzyme E2 D3;Ubiquitin-conjugating enzyme E2 D2	Ube2d3;Ube2d2
31.0731	31.059	31.019	31.1383	30.9222	31.0491	30.6312	30.7971	1.16671	P61082;F7CDT0;F6WMC0	NEDD8-conjugating enzyme Ubc12	Ube2m
30.6948	30.5922	30.5705	30.617	30.5917	30.6214	30.7226	30.7109	0.970618	P61087;D3Z4U3	Ubiquitin-conjugating enzyme E2 K	Ube2k
32.5031	32.6014	32.5872	32.6215	32.6249	32.8892	32.6574	32.8122	0.890307	P61089	Ubiquitin-conjugating enzyme E2 N	Ube2n
33.0179	33.0503	33.0694	33.159	32.9591	33.3246	33.0501	33.342	0.936402	P61161	Actin-related protein 2	Actr2
30.7259	30.8301	30.6844	30.8243	30.7007	30.6976	30.4683	30.5439	1.12004	P61164	Alpha-centractin	Actr1a
NaN	NaN	NaN	NaN	NaN	NaN	NaN	27.0358	NaN	P61166	Transmembrane protein 258	Tmem258
30.8236	30.8324	30.7813	30.8569	30.9025	30.7656	30.9006	30.9955	0.95429	P61202;P61202-2;A2AQE4	COP9 signalosome complex subunit 2	Cops2
30.0291	29.9137	29.9044	29.9171	29.9044	29.9344	30.14	29.9047	0.979556	P61211;F8WIB1	ADP-ribosylation factor-like protein 1	Arl1
NaN	NaN	NaN	NaN	NaN	NaN	NaN	26.0379	NaN	P61219	DNA-directed RNA polymerases I, II, and III subunit RPABC2	Polr2f
31.7424	31.7995	31.7541	31.7975	31.5179	31.5876	31.6345	31.6257	1.13442	P61222	ATP-binding cassette sub-family E member 1	Abce1
27.3503	27.4201	27.481	27.4571	26.8441	26.9764	NaN	27.3647	1.28823	P61226	Ras-related protein Rap-2b	Rap2b
33.7145	33.6361	33.5271	33.636	33.6311	33.5101	33.3453	33.5814	1.08031	P61255;B1ARA3;B1ARA5	60S ribosomal protein L26	Rpl26
29.0238	29.0646	29.0238	29.1308	28.9513	29.0145	29.1736	28.949	1.02715	P61290;A2A4J1;A2A4J3	Proteasome activator complex subunit 3	Psme3
29.9324	29.5416	29.5716	29.5813	29.6975	29.7773	29.7007	29.7287	0.953084	P61327	Protein mago nashi homolog	Magoh
33.5262	33.7248	33.6221	33.5251	33.6242	33.9269	33.6906	33.8255	0.890539	P61358	60S ribosomal protein L27	Rpl27
NaN	NaN	22.5798	22.6797	22.1796	22.6321	NaN	22.3555	1.18155	P61406	Telomerase-binding protein EST1A	Smg6
NaN	NaN	NaN	NaN	NaN	NaN	NaN	20.5969	NaN	P61458	Pterin-4-alpha-carbinolamine dehydratase	Pcbd1
32.6012	32.5163	32.5245	32.6263	32.1472	32.4206	32.6917	32.5364	1.0853	P61514	60S ribosomal protein L37a	Rpl37a
26.8688	26.9997	26.953	26.9251	26.6102	27.0297	26.7239	26.8365	1.09929	P61588;E9Q8D7	Rho-related GTP-binding protein RhoE	Rnd3
26.8121	26.7608	26.6078	26.6453	26.7533	26.8735	26.8247	NaN	0.92616	Q9DB82;P61600;E9PXA4	N-alpha-acetyltransferase 20	Naa20
31.5656	31.8279	31.6964	31.7713	31.7144	31.6979	31.9028	31.4306	1.02022	P61620	Protein transport protein Sec61 subunit alpha isoform 1	Sec61a1
32.3492	32.4795	32.3301	32.4177	32.2412	32.2773	32.4263	32.1412	1.08871	P61622	Integrin alpha-11	Itga11
32.2243	31.9171	32.072	32.0111	31.7785	32.1554	32.0833	31.975	1.04108	P61750;E9Q798	ADP-ribosylation factor 4	Arf4
29.6539	29.7541	29.7651	29.6502	29.869	29.6916	29.8751	29.7368	0.941283	P61759;Q3TIR6	Prefoldin subunit 3	Vbp1
28.9048	29.0959	29.0379	28.7532	28.8009	28.9254	28.9528	28.7777	1.05977	P61804	Dolichyl-diphosphooligosaccharide--protein glycosyltransferase subunit DAD1	Dad1
26.3663	26.1827	NaN	26.3973	26.1422	NaN	NaN	NaN	1.12758	P61922;P61922-2	4-aminobutyrate aminotransferase, mitochondrial	Abat
29.8309	29.8922	29.8524	29.9309	30.0431	29.9845	29.8418	29.8849	0.957952	P61924	Coatomer subunit zeta-1	Copz1
29.0984	28.9872	29.0062	29.1595	29.1046	29.1	28.4336	29.2581	1.06345	P61961	Ubiquitin-fold modifier 1	Ufm1
25.6941	25.6097	25.6181	25.7182	25.4477	NaN	NaN	NaN	1.15855	P61963	DDB1- and CUL4-associated factor 7	Dcaf7
27.7634	28.0146	28.0328	28.2513	27.9477	28.1102	28.0974	28.1089	0.965585	P61965;F6Q3W0	WD repeat-containing protein 5	Wdr5
26.5833	26.3133	26.4533	26.3696	26.3981	26.5724	26.8633	26.657	0.874891	P61967;D3Z0D6;D3YXN0	AP-1 complex subunit sigma-1A	Ap1s1
30.9565	30.9249	30.8605	30.9445	30.6651	31.1861	31.0078	31.0589	0.960678	P61971	Nuclear transport factor 2	Nutf2
34.6544	34.6427	34.7231	34.639	34.6572	34.5674	34.6483	34.6238	1.02856	P61979;P61979-2;H3BLL4;D3YWG1;H3BK96	Heterogeneous nuclear ribonucleoprotein K	Hnrnpk;Gm7964
34.3461	34.2559	34.3621	34.2676	34.2791	34.2488	34.4089	34.2619	1.00573	P61982	14-3-3 protein gamma;14-3-3 protein gamma, N-terminally processed	Ywhag
29.0166	29.083	29.115	29.1651	29.1761	29.4844	29.2453	29.2223	0.87837	P62071	Ras-related protein R-Ras2	Rras2
NaN	NaN	NaN	NaN	NaN	NaN	NaN	27.1103	NaN	P62073	Mitochondrial import inner membrane translocase subunit Tim10	Timm10
28.7307	28.7916	28.6192	28.8301	28.9845	28.1798	28.468	28.3718	1.18253	P62075	Mitochondrial import inner membrane translocase subunit Tim13	Timm13
28.4211	28.3053	28.3444	28.5122	28.1793	27.9657	28.1717	27.7182	1.30769	P62077	Mitochondrial import inner membrane translocase subunit Tim8 B	Timm8b
33.9639	33.7863	33.9351	34.0209	33.9062	33.6986	33.5086	33.758	1.15565	P62082;J3QJZ3;F6SVV1	40S ribosomal protein S7	Rps7;Gm9493
32.5747	32.6355	32.6458	32.5892	32.4969	32.7776	32.7462	32.7994	0.9371	P62137	Serine/threonine-protein phosphatase PP1-alpha catalytic subunit	Ppp1ca
29.9603	29.874	29.9826	30.054	29.9333	29.9262	29.9687	30.0941	0.991133	P62141	Serine/threonine-protein phosphatase PP1-beta catalytic subunit	Ppp1cb
32.2933	32.2228	32.2626	32.2284	32.3329	32.3919	32.4217	32.3145	0.924359	P62192	26S protease regulatory subunit 4	Psmc1
31.9968	32.1375	32.0311	32.0097	32.1259	32.1579	32.3027	32.2154	0.897075	P62196;Q8K1K2	26S protease regulatory subunit 8	Psmc5
33.9804	34.1208	34.1334	34.1011	34.1203	34.157	34.2019	34.3487	0.918244	P62204;Q3UKW2	Calmodulin	Calm1
33.7878	33.7938	33.7558	33.7285	33.8023	33.9783	34.0541	33.9538	0.882305	P62242	40S ribosomal protein S8	Rps8
NaN	NaN	NaN	NaN	NaN	25.9245	25.5691	25.7329	NaN	P62254;D6RES1	Ubiquitin-conjugating enzyme E2 G1;Ubiquitin-conjugating enzyme E2 G1, N-terminally processed	Ube2g1
35.0375	34.9073	34.9608	35.0376	34.8922	35.0146	34.9032	34.9716	1.0284	P62259;D6REF3	14-3-3 protein epsilon	Ywhae
33.1218	33.0702	33.0999	33.1086	33.2467	32.9673	33.2139	32.8677	1.01834	P62264;D3YVF4;D3Z7I1	40S ribosomal protein S14	Rps14
32.9588	32.8824	33.0247	32.9552	33.0641	32.8398	32.9764	32.8861	1.00952	P62267	40S ribosomal protein S23	Rps23
31.0503	31.5563	31.4139	31.141	30.9285	31.2193	31.7841	31.1378	1.01603	P62274	40S ribosomal protein S29	Rps29
33.7665	33.9017	33.9091	33.8163	33.8444	33.8061	33.6715	33.7858	1.05077	P62281	40S ribosomal protein S11	Rps11
33.5463	33.424	33.47	33.4365	33.5737	33.3998	33.6402	33.5202	0.956426	P62301	40S ribosomal protein S13	Rps13
29.6215	29.7335	29.5658	29.616	29.4191	29.6028	29.6275	29.7637	1.02167	P62305;E9Q4F4	Small nuclear ribonucleoprotein E	Snrpe
28.53	28.3683	28.7473	28.4218	28.6669	28.5754	27.8714	28.5818	1.06657	P62307	Small nuclear ribonucleoprotein F	Snrpf
29.9265	29.8642	29.9606	29.9887	29.746	30.1136	30.1953	30.0002	0.946861	P62309	Small nuclear ribonucleoprotein G	Snrpg
27.7725	27.4322	27.6705	27.75	27.3744	NaN	NaN	NaN	1.2158	P62311	U6 snRNA-associated Sm-like protein LSm3	Lsm3
28.4094	NaN	28.4221	28.3717	28.1937	27.8837	27.9803	28.2655	1.24856	P62313	U6 snRNA-associated Sm-like protein LSm6	Lsm6
31.3006	31.1954	31.2489	31.3876	31.1624	31.236	31.3779	30.9138	1.07968	P62315	Small nuclear ribonucleoprotein Sm D1	Snrpd1
31.3034	31.3419	31.43	31.4781	31.1974	31.2736	31.2285	31.5725	1.04997	P62317;D3Z5N9	Small nuclear ribonucleoprotein Sm D2	Snrpd2;Gm5449
30.8206	30.7111	30.9682	30.7229	30.9217	30.498	30.5671	30.353	1.16534	P62320	Small nuclear ribonucleoprotein Sm D3	Snrpd3
26.2103	NaN	26.1306	26.2712	NaN	NaN	NaN	NaN	NaN	P62322	U6 snRNA-associated Sm-like protein LSm5	Lsm5
29.0168	28.6774	28.852	28.9279	28.6223	28.6003	28.891	28.5865	1.14353	P62331	ADP-ribosylation factor 6	Arf6
31.9996	31.9768	31.982	32.0379	32.0735	32.2233	32.191	32.0883	0.904411	P62334	26S protease regulatory subunit 10B	Psmc6
24.4344	NaN	24.4663	NaN	NaN	NaN	NaN	NaN	NaN	P62340	TATA box-binding protein-like protein 1	Tbpl1
NaN	NaN	NaN	NaN	NaN	25.2607	NaN	25.7283	NaN	P62488	DNA-directed RNA polymerase II subunit RPB7	Polr2g
NaN	NaN	NaN	NaN	NaN	NaN	NaN	24.729	NaN	P62492;G3UY29;E9Q3P9;F8WGS1	Ras-related protein Rab-11A	Rab11a;Rab11b
NaN	NaN	27.253	NaN	NaN	NaN	NaN	NaN	NaN	P62500-2;P62500;H3BLI9;D3YW86;D3Z0V7;E9QLZ1;P62500-3	TSC22 domain family protein 1	Tsc22d1
29.928	29.9295	29.7864	29.7871	29.8428	29.9632	30.1241	29.9413	0.926524	P62627;A2AVR9	Dynein light chain roadblock-type 1	Dynlrb1
34.5021	34.5335	34.5918	34.4942	34.5354	34.3841	34.6726	34.4698	1.0104	P62702	40S ribosomal protein S4, X isoform	Rps4x
NaN	NaN	NaN	NaN	NaN	NaN	NaN	25.6946	NaN	P62715	Serine/threonine-protein phosphatase 2A catalytic subunit beta isoform	Ppp2cb
33.622	33.5671	33.5676	33.6332	33.5676	33.4548	33.4966	33.6959	1.03079	P62717	60S ribosomal protein L18a	Rpl18a
36.1687	36.196	36.2804	36.236	36.4288	36.1976	36.3292	36.2868	0.939311	P62737	Actin, aortic smooth muscle	Acta2
29.3825	29.3158	29.361	29.4401	29.3653	29.2246	29.3954	29.3342	1.03167	P62743	AP-2 complex subunit sigma	Ap2s1
27.1568	27.098	27.044	26.96	27.5041	26.9959	NaN	26.2708	1.10275	P62746	Rho-related GTP-binding protein RhoB	Rhob
30.2562	30.2368	30.2869	30.2462	30.0994	29.8434	29.9171	29.6596	1.29832	P62748;P84075;A2A7R5;E9PV73	Hippocalcin-like protein 1;Neuron-specific calcium-binding protein hippocalcin	Hpcal1;Hpca
33.6429	33.6159	33.753	33.6585	33.5965	33.618	33.0003	33.7079	1.13832	P62751;D3YU45;D3Z1D6;D3YU46	60S ribosomal protein L23a	Rpl23a
33.5426	33.6371	33.699	33.7251	33.6751	33.8652	33.6074	33.8209	0.938742	P62754	40S ribosomal protein S6	Rps6
32.1334	31.9256	32.0762	32.0341	32.2723	32.3197	32.337	32.091	0.862936	P62774	Myotrophin	Mtpn
35.9785	35.8955	35.9713	35.9328	35.8958	35.6146	35.5776	35.6781	1.19168	P62806	Histone H4	Hist1h4a
31.3435	31.4169	31.3721	31.3635	31.4786	31.1487	31.4023	31.135	1.05911	P62814	V-type proton ATPase subunit B, brain isoform	Atp6v1b2
33.5561	33.441	33.5971	33.5782	33.5405	33.5874	33.5907	33.5475	0.983894	P62821	Ras-related protein Rab-1A	Rab1A
33.6518	33.7064	33.6174	33.6003	33.6597	33.7893	33.9166	33.7345	0.913167	P62827	GTP-binding nuclear protein Ran	Ran
33.32	33.1195	33.1225	33.2735	33.2723	32.9931	33.0188	33.0626	1.08837	P62830	60S ribosomal protein L23	Rpl23
32.1345	32.0728	31.9541	31.9931	32.2416	31.9284	31.9051	32.1984	0.97959	P62835	Ras-related protein Rap-1A	Rap1a
32.8378	32.3689	32.7623	32.6937	32.6365	32.7442	32.8116	33.0224	0.908778	P62843;D3YTQ9	40S ribosomal protein S15	Rps15
31.4303	31.3412	31.5375	31.5931	31.0325	31.21	31.005	30.775	1.38501	P62849;P62849-2;P62849-3	40S ribosomal protein S24	Rps24
33.0088	32.9912	33.0507	33.0126	32.9539	33.107	32.9676	32.705	1.05881	P62852	40S ribosomal protein S25	Rps25
33.2194	33.172	33.2501	33.2229	33.0656	32.9474	33.2351	33.2964	1.057	P62855	40S ribosomal protein S26	Rps26
31.3488	31.457	31.3763	31.2337	31.5008	30.0297	31.4909	30.8432	1.3084	P62862;Q642K5	40S ribosomal protein S30	Fau
31.9608	31.9078	31.9231	31.9786	31.849	31.9127	31.8916	31.8629	1.04502	P62869	Transcription elongation factor B polypeptide 2	Tceb2
31.5282	31.2681	31.3723	31.3612	31.1079	30.8093	30.7222	30.747	1.4498	P62874;H3BKR2;H3BLF7	Guanine nucleotide-binding protein G(I)/G(S)/G(T) subunit beta-1	Gnb1
27.9299	27.8621	27.9375	27.991	27.8955	27.5575	27.6392	27.8385	1.14667	P62878	E3 ubiquitin-protein ligase RBX1;E3 ubiquitin-protein ligase RBX1, N-terminally processed	Rbx1
32.8548	33.0121	33.1169	32.9807	32.7423	32.7837	32.8128	32.9444	1.12531	P62880;E9QKR0;D3YZX3;D3Z1M1;D3Z1T4	Guanine nucleotide-binding protein G(I)/G(S)/G(T) subunit beta-2	Gnb2
32.786	32.8175	32.8533	32.8649	32.8023	32.7931	32.7284	32.7882	1.03701	P62889	60S ribosomal protein L30	Rpl30
NaN	NaN	NaN	NaN	26.5111	NaN	NaN	NaN	NaN	P62892	60S ribosomal protein L39	Rpl39
33.1286	33.3501	33.2814	33.2463	33.3983	32.9559	33.017	32.9362	1.12877	P62900	60S ribosomal protein L31	Rpl31
34.7159	34.6179	34.6501	34.6879	34.6887	34.7162	34.6657	34.7377	0.976624	P62908;D3YV43	40S ribosomal protein S3	Rps3
33.6869	33.5811	33.5598	33.5525	33.5386	33.5693	33.6623	33.4981	1.0196	P62911	60S ribosomal protein L32	Rpl32
26.6657	26.6348	26.4355	26.812	26.3253	26.7325	26.1121	26.6671	1.13112	P62915	Transcription initiation factor IIB	Gtf2b
34.2323	34.2871	34.3267	34.332	34.1702	34.2182	34.1559	34.3014	1.05929	P62918	60S ribosomal protein L8	Rpl8
33.0439	32.9578	33.0517	33.0306	33.0851	32.9874	33.186	32.9357	0.981085	P62960;A2BGG7	Nuclease-sensitive element-binding protein 1	Ybx1
34.555	34.624	34.5836	34.5869	34.7957	34.5256	34.5126	34.5893	0.98731	P62962;Q5SX49	Profilin-1;Profilin	Pfn1
29.8216	29.725	29.7934	29.7986	30.4608	29.9805	30.3112	30.4113	0.704026	P62965	Cellular retinoic acid-binding protein 1	Crabp1
34.8142	34.6049	34.7158	34.5916	34.5886	34.6144	34.5458	34.6008	1.06749	P62983	Ubiquitin-40S ribosomal protein S27a;Ubiquitin;40S ribosomal protein S27a	Rps27a
32.4451	32.4877	32.5233	32.3881	32.444	32.3353	32.2833	32.4649	1.05641	P63001;Q3TLP8;P60764	Ras-related C3 botulinum toxin substrate 1;Ras-related C3 botulinum toxin substrate 3	Rac1;Rac3
NaN	NaN	NaN	NaN	NaN	NaN	NaN	23.9068	NaN	P63002;P63002-2	Amino-terminal enhancer of split	Aes
31.7768	31.6735	31.6895	31.8052	31.7615	31.8176	31.9645	31.88	0.920411	P63005;P63005-2	Platelet-activating factor acetylhydrolase IB subunit alpha	Pafah1b1
36.3157	36.4013	36.4108	36.3686	36.3754	36.502	36.4533	36.4262	0.955862	P63017;Q504P4	Heat shock cognate 71 kDa protein	Hspa8
29.2374	29.1776	29.1965	29.2067	29.4013	29.4511	29.5948	29.4097	0.835276	P63024;P63044;B0QZN5	Vesicle-associated membrane protein 3;Vesicle-associated membrane protein 2	Vamp3;Vamp2
33.6771	33.4973	33.572	33.6763	33.44	33.621	33.5816	33.3952	1.06897	P63028;D3YU75	Translationally-controlled tumor protein	Tpt1
31.2118	31.1681	31.2376	31.2842	31.0901	31.427	31.5095	31.1944	0.946172	P63037;B1AXY1;B1AXY0	DnaJ homolog subfamily A member 1	Dnaja1
34.7792	34.7785	34.8237	34.7817	34.7112	34.7896	34.8154	34.8197	1.00472	P63038	60 kDa heat shock protein, mitochondrial	Hspd1
NaN	NaN	NaN	NaN	NaN	NaN	NaN	24.3282	NaN	P63040;P84086	Complexin-1;Complexin-2	Cplx1;Cplx2
30.3089	30.2808	30.3175	30.2418	30.5325	30.3002	30.6157	30.5806	0.858565	P63073	Eukaryotic translation initiation factor 4E	Eif4e
32.511	32.4686	32.5111	32.5755	32.5861	32.3652	32.2424	32.4752	1.07127	P63085	Mitogen-activated protein kinase 1	Mapk1
29.3902	29.5027	29.6579	29.7217	29.5844	29.5037	29.8229	29.5954	0.960279	P63087;P63087-2	Serine/threonine-protein phosphatase PP1-gamma catalytic subunit	Ppp1cc
28.6747	28.3495	28.772	28.6339	29.945	29.8847	30.4716	30.3311	0.341374	P63089	Pleiotrophin	Ptn
30.7461	30.6424	30.6682	30.6315	30.5294	30.491	30.8021	30.5754	1.05159	P63094;Z4YKV1;P63094-2;Q6R0H7;Q6R0H7-4;P63094-3	Guanine nucleotide-binding protein G(s) subunit alpha isoforms short;Guanine nucleotide-binding protein G(s) subunit alpha isoforms XLas	Gnas
34.7094	34.7689	34.8386	34.783	34.7701	34.8674	34.7621	34.8447	0.975288	P63101	14-3-3 protein zeta/delta	Ywhaz
NaN	NaN	NaN	NaN	NaN	NaN	NaN	25.6018	NaN	P63147	Ubiquitin-conjugating enzyme E2 B	Ube2b
26.8066	NaN	26.389	NaN	NaN	NaN	NaN	26.6861	0.94063	P63154	Crooked neck-like protein 1	Crnkl1
33.2864	33.3272	33.3847	33.2358	33.1239	33.167	33.1313	32.9176	1.16762	P63158;D3YZ18;D3YVC6	High mobility group protein B1	Hmgb1
28.4305	28.5614	28.5258	28.3179	28.5001	28.3749	28.4688	28.0941	1.07135	P63166	Small ubiquitin-related modifier 1	Sumo1
29.5133	29.4422	29.4753	29.4868	29.3128	29.3149	28.9859	29.3737	1.17493	P63168;Q80ZS7	Dynein light chain 1, cytoplasmic	Dynll1;BC048507
27.6688	27.7221	27.6446	27.7927	27.6574	28.0546	28.4225	NaN	0.791256	P63213	Guanine nucleotide-binding protein G(I)/G(S)/G(O) subunit gamma-2	Gng2
33.9862	33.9592	33.932	34.0659	33.9451	33.9085	33.9894	33.9703	1.02278	P63242;J3QPS8	Eukaryotic translation initiation factor 5A-1	Eif5a
28.4592	28.3459	28.5544	28.5421	29.1094	29.199	29.0498	28.5811	0.702502	P63254	Cysteine-rich protein 1	Crip1
38.1983	38.1805	38.1874	38.1461	38.2674	38.1388	38.1585	38.2151	0.988371	P63260	Actin, cytoplasmic 2;Actin, cytoplasmic 2, N-terminally processed	Actg1
NaN	NaN	NaN	NaN	NaN	NaN	NaN	24.4992	NaN	P63268;D3YZY0	Actin, gamma-enteric smooth muscle	Actg2
33.2932	33.1999	33.0922	33.0871	33.329	33.0989	33.3532	33.3311	0.92662	P63276	40S ribosomal protein S17	Rps17
30.662	30.7192	30.8099	30.8141	30.6588	30.7099	30.844	30.7434	1.00854	P63280;G3UYP0;Q8CFZ0	SUMO-conjugating enzyme UBC9	Ube2i
28.213	28.7044	28.4439	28.4513	28.5797	28.4663	29.1241	28.4188	0.874133	P63321	Ras-related protein Ral-A	Rala
34.0555	34.0419	34.088	33.9211	33.9853	34.1881	34.121	34.166	0.940516	P63325;Q3UW83	40S ribosomal protein S10	Rps10
30.2238	30.2719	30.1354	30.2538	30.266	30.3224	30.3672	30.2853	0.940174	P63328;P63328-2	Serine/threonine-protein phosphatase 2B catalytic subunit alpha isoform	Ppp3ca
31.5651	31.7462	31.6764	31.6628	31.5833	31.4953	31.4185	31.4326	1.13304	P63330	Serine/threonine-protein phosphatase 2A catalytic subunit alpha isoform	Ppp2ca
32.5616	32.5	32.5176	32.5065	32.3947	32.1756	32.0048	32.2948	1.23452	P67778;Q5SQG5	Prohibitin	Phb
29.7975	29.9468	30.0243	29.9328	29.7152	29.9119	29.9231	30.1158	1.00615	P67871;G3UXG7;G3UZJ5;G3UZA4;G3UZX4	Casein kinase II subunit beta	Csnk2b
32.0787	32.3075	32.2307	32.1997	32.3189	32.0554	32.2358	32.1343	1.01259	P67984	60S ribosomal protein L22	Rpl22
31.8291	31.6878	31.7076	31.7785	31.7843	31.6372	31.4639	31.6142	1.09115	P68037;D3YZS3	Ubiquitin-conjugating enzyme E2 L3	Ube2l3
33.9252	34.0545	33.9923	34.045	33.9784	33.9288	33.8429	34.0049	1.04645	P68040	Guanine nucleotide-binding protein subunit beta-2-like 1;Guanine nucleotide-binding protein subunit beta-2-like 1, N-terminally processed	Gnb2l1
NaN	NaN	NaN	NaN	26.7362	26.6899	26.8126	26.64	NaN	P68134	Actin, alpha skeletal muscle	Acta1
28.7528	28.8603	28.7717	28.7893	28.9027	29.1397	29.1585	29.1901	0.809877	P68181;P68181-2;P68181-3;P68181-4	cAMP-dependent protein kinase catalytic subunit beta	Prkacb
27.6026	27.8754	27.7576	27.5469	27.8637	27.5198	27.9611	27.9436	0.916099	P68368	Tubulin alpha-4A chain	Tuba4a
31.7953	31.9279	31.9035	31.9972	31.8863	31.7557	31.9301	31.598	1.08181	P68369;P05214	Tubulin alpha-1A chain;Tubulin alpha-3 chain	Tuba1a;Tuba3a
35.9499	35.9927	35.9861	36.0513	35.9105	35.8283	35.8219	35.8368	1.10621	P68372;Q9D6F9	Tubulin beta-4B chain;Tubulin beta-4A chain	Tubb4b;Tubb4a
28.7331	28.8788	28.5818	NaN	28.7944	28.719	28.707	NaN	0.99385	P68373	Tubulin alpha-1C chain	Tuba1c
29.8358	29.9967	29.892	29.7601	30.0037	30.1022	29.8087	29.8688	0.94954	P68433	Histone H3.1	Hist1h3a
32.373	32.4283	32.3574	32.4269	32.4339	32.5015	32.4033	32.5851	0.943079	P68510	14-3-3 protein eta	Ywhah
30.5029	30.5074	30.4745	30.5894	30.5381	30.5544	30.8088	30.5223	0.94125	P70122;F6TN03	Ribosome maturation protein SBDS	Sbds
25.8855	NaN	NaN	25.2408	NaN	NaN	25.4925	NaN	1.05019	P70158	Acid sphingomyelinase-like phosphodiesterase 3a	Smpdl3a
33.946	33.9595	33.9307	34.0001	33.955	34.1158	34.1671	34.0129	0.930692	P70168	Importin subunit beta-1	Kpnb1
26.707	26.7925	27.0622	26.5714	26.6959	27.086	26.6081	26.7674	0.995798	P70180	Atrial natriuretic peptide receptor 3	Npr3
NaN	NaN	NaN	NaN	NaN	26.0054	NaN	NaN	NaN	P70188;P70188-2	Kinesin-associated protein 3	Kifap3
31.6937	31.455	31.4811	31.5301	31.7084	31.9816	32.081	31.9406	0.764228	P70195	Proteasome subunit beta type-7	Psmb7
29.6045	29.7845	29.7795	29.7611	30.1064	30.2317	30.202	29.9843	0.758541	P70202	Latexin	Lxn
28.6294	28.4068	28.4446	28.5171	27.9093	28.1383	28.3362	27.9924	1.32448	P70206	Plexin-A1	Plxna1
29.5096	29.591	29.546	29.662	28.9994	29.214	29.2551	29.0717	1.35858	P70227	Inositol 1,4,5-trisphosphate receptor type 3	Itpr3
26.8013	27.213	27.3065	27.361	27.3156	26.975	27.4692	26.6661	1.04534	P70245;A2AC29	3-beta-hydroxysteroid-Delta(8),Delta(7)-isomerase	Ebp
[truncated: 3,007 more rows]
