# Supplementary material for: Phosphoproteomics reveals that Parkinson's disease kinase LRRK2 regulates a subset of Rab GTPases
Source: eLife. 2016 Jan 29;5:e12813. doi: 10.7554/eLife.12813 (PMC4769169; doi:10.7554/eLife.12813)
Supplement: Supplementary file 3. — (B) Significantly modulated sites of PS2. DOI: http://dx.doi.org/10.7554/eLife.12813.021 [file elife-12813-supp3.xlsx]

## Sheet: TableS3A
Gene names	Protein names	Protein IDs (Uniprot)	Amino acid	Position	Cluster
Hist1h1a	Histone H1.1	P43275	S	106	Cluster 1
Ccdc61	Coiled-coil domain-containing protein 61	Q3UJV1	S	332	Cluster 1
Ccdc61	Coiled-coil domain-containing protein 61	Q3UJV1	S	330	Cluster 1
Col1a1	Collagen alpha-1(I) chain	P11087	S	260	Cluster 1
Lrpap1	Alpha-2-macroglobulin receptor-associated protein	P55302	S	313	Cluster 1
Whsc1l1	Histone-lysine N-methyltransferase NSD3;Histone-lysine N-methyltransferase	Q6P2L6	S	457	Cluster 1
Phldb1	Pleckstrin homology-like domain family B member 1	Q6PDH0	S	520	Cluster 1
Zfp36	Tristetraprolin	P22893	S	85	Cluster 1
Tcf20	Transcription factor 20	Q9EPQ8	S	1550	Cluster 1
Map7d1	MAP7 domain-containing protein 1	A2AJI0	S	454	Cluster 1
Glrx3	Glutaredoxin-3	Q9CQM9	S	120	Cluster 1
Wnk1	Serine/threonine-protein kinase WNK1	P83741	S	1256	Cluster 1
Rapgef6		Q5NCJ1	S	1506	Cluster 1
Hspb1	Heat shock protein beta-1	P14602	S	203	Cluster 1
Nova1	RNA-binding protein Nova-1	Q9JKN6	S	154	Cluster 1
Psip1	PC4 and SFRS1-interacting protein	Q99JF8	S	345	Cluster 1
Esyt1	Extended synaptotagmin-1	Q3U7R1	S	951	Cluster 1
Nolc1		E9Q5C9	S	626	Cluster 1
Nolc1		E9Q5C9	S	625	Cluster 1
Lmnb1	Lamin-B1	P14733	S	17	Cluster 1
	Uncharacterized protein C1orf21 homolog	Q8K207	S	115	Cluster 1
Ints10	Integrator complex subunit 10	Q8K2A7	S	231	Cluster 1
Kdm5c	Lysine-specific demethylase 5C	P41230	S	317	Cluster 1
Sac3d1	SAC3 domain-containing protein 1	G5E8Q7	S	236	Cluster 1
Rbl1	Retinoblastoma-like protein 1	Q64701	S	983	Cluster 1
Vcp	Transitional endoplasmic reticulum ATPase	Q01853	S	282	Cluster 1
Mum1l1	PWWP domain-containing protein MUM1L1	Q4VA55	S	128	Cluster 1
Dab2ip	Disabled homolog 2-interacting protein	Q3UHC7	S	895	Cluster 1
Trio	Triple functional domain protein	Q0KL02	S	1786	Cluster 2
Trio	Triple functional domain protein	Q0KL02	S	1785	Cluster 2
Cobl	Protein cordon-bleu	Q5NBX1	S	235	Cluster 2
Pak3	Serine/threonine-protein kinase PAK 3	Q61036	S	154	Cluster 2
Trio	Triple functional domain protein	Q0KL02	S	2674	Cluster 2
Tmem184b	Transmembrane protein 184B	Q8BG09	S	388	Cluster 2
Rfx5	DNA-binding protein Rfx5	Q9JL61	S	10	Cluster 2
Cap1	Adenylyl cyclase-associated protein 1	P40124	S	307	Cluster 2
Sdpr	Serum deprivation-response protein	Q63918	S	241	Cluster 2
Sorbs1		E9QNA7	S	164	Cluster 2
Epb41l2	Band 4.1-like protein 2	O70318	S	492	Cluster 2
Pdlim5	PDZ and LIM domain protein 5	Q8CI51	S	134	Cluster 2
Ppp1r18	Phostensin	Q8BQ30	S	134	Cluster 2
Depdc1b	DEP domain-containing protein 1B	Q8BH88	S	160	Cluster 2
Clasp1		A0A087WS18	S	676	Cluster 2
Clasp1		A0A087WS18	S	672	Cluster 2
Lima1	LIM domain and actin-binding protein 1	Q9ERG0	S	602	Cluster 2
Flnb	Filamin-B	Q80X90	S	1916	Cluster 2
Wnk4	Serine/threonine-protein kinase WNK4	Q80UE6	S	1196	Cluster 2
Numb	Protein numb homolog	Q9QZS3	S	194	Cluster 2
Sirpa	Tyrosine-protein phosphatase non-receptor type substrate 1	P97797	S	409	Cluster 2
Errfi1	ERBB receptor feedback inhibitor 1	Q99JZ7	S	72	Cluster 2
Macf1	Microtubule-actin cross-linking factor 1	E9QA63	S	4124	Cluster 2
Elf4	ETS-related transcription factor Elf-4	Q9Z2U4	S	187	Cluster 2
Trpm7	Transient receptor potential cation channel subfamily M member 7	Q923J1	S	1403	Cluster 2
Maged1	Melanoma-associated antigen D1	Q9QYH6	S	319	Cluster 2
Med26	Mediator of RNA polymerase II transcription subunit 26	Q7TN02	S	361	Cluster 2
Bclaf1	Bcl-2-associated transcription factor 1	Q8K019	S	314	Cluster 2
Fbxo38	F-box only protein 38	Q8BMI0	S	624	Cluster 2
Tspyl1	Testis-specific Y-encoded-like protein 1	O88852	S	51	Cluster 2
Parp3		Q3ULW8	S	14	Cluster 2
Ahnak		E9Q616	T	159	Cluster 3
Ccs	Copper chaperone for superoxide dismutase	Q9WU84	S	267	Cluster 3
Arhgef7	Rho guanine nucleotide exchange factor 7	Q9ES28	S	776	Cluster 3
Hmga1	High mobility group protein HMG-I/HMG-Y	P17095	S	102	Cluster 3
Synpo		E9Q3E2	S	1091	Cluster 3
Ccdc88a	Girdin	Q5SNZ0	S	1809	Cluster 3
Rpl24;Gm17430	60S ribosomal protein L24	Q8BP67	S	64	Cluster 3
Cic	Protein capicua homolog	Q924A2	T	2300	Cluster 4
Ncor2	Nuclear receptor corepressor 2	F8VQL9	S	1784	Cluster 4
Phldb1	Pleckstrin homology-like domain family B member 1	Q6PDH0	S	656	Cluster 4
Tbc1d10b	TBC1 domain family member 10B	Q8BHL3	S	673	Cluster 4
Lrrk1	Leucine-rich repeat serine/threonine-protein kinase 1	Q3UHC2	T	672	Cluster 4
Psip1	PC4 and SFRS1-interacting protein	Q99JF8	S	171	Cluster 4
Phldb1	Pleckstrin homology-like domain family B member 1	Q6PDH0	T	550	Cluster 4
Ssb	Lupus La protein homolog	P32067	S	219	Cluster 4
Kank1		E9Q238	S	1350	Cluster 4
Snx7		F8WI30	S	10	Cluster 4
Osbpl5	Oxysterol-binding protein-related protein 5;Oxysterol-binding protein	Q9ER64	S	12	Cluster 4
Rab23	Ras-related protein Rab-23	Q9D4I9	S	208	Cluster 4
Mex3c	RNA-binding E3 ubiquitin-protein ligase MEX3C	Q05A36	S	222	Cluster 4
Plekhg2	Pleckstrin homology domain-containing family G member 2	Q6KAU7	S	446	Cluster 4
Plekhg2	Pleckstrin homology domain-containing family G member 2	Q6KAU7	S	442	Cluster 4
Clip2	CAP-Gly domain-containing linker protein 2	Q9Z0H8	S	974	Cluster 4
Trappc12	Trafficking protein particle complex subunit 12	Q8K2L8	S	309	Cluster 4
Dlc1	Rho GTPase-activating protein 7	E9QKB1	S	818	Cluster 4
Casc5	Protein CASC5	A3KGI3	S	60	Cluster 4
Phka2	Phosphorylase b kinase regulatory subunit alpha, liver isoform	Q8BWJ3	S	729	Cluster 4
Ubap2l	Ubiquitin-associated protein 2-like	Q80X50-4	S	624	Cluster 4
Dlg5		E9Q9I2	S	949	Cluster 4
Dvl2	Segment polarity protein dishevelled homolog DVL-2	Q60838	S	620	Cluster 4
Dvl2	Segment polarity protein dishevelled homolog DVL-2	Q60838	S	618	Cluster 4
Dvl2	Segment polarity protein dishevelled homolog DVL-2	Q60838	S	616	Cluster 4
Mapre2	Microtubule-associated protein RP/EB family member 2	Q8R001	S	199	Cluster 4
Plekhg5	Pleckstrin homology domain-containing family G member 5	Q66T02	S	259	Cluster 4
Map1a	Microtubule-associated protein 1A;MAP1A heavy chain;MAP1 light chain LC2	Q9QYR6	S	527	Cluster 5
Map1a	Microtubule-associated protein 1A;MAP1A heavy chain;MAP1 light chain LC2	Q9QYR6	S	526	Cluster 5
Tjp1	Tight junction protein ZO-1	B9EHJ3	S	280	Cluster 5
Tjp1	Tight junction protein ZO-1	B9EHJ3	S	277	Cluster 5
Kiaa0907	UPF0469 protein KIAA0907	Q3TCX3	S	570	Cluster 5
Kiaa0907	UPF0469 protein KIAA0907	Q3TCX3	S	569	Cluster 5
Hnrnpm	Heterogeneous nuclear ribonucleoprotein M	Q9D0E1	S	700	Cluster 5
Dock7	Dedicator of cytokinesis protein 7	Q8R1A4	S	900	Cluster 5
Lrrk2	Leucine-rich repeat serine/threonine-protein kinase 2	Q5S006	S	935	Cluster 5
Epb4.1l1		A2AUK8	S	638	Cluster 5
Epb4.1l1		A2AUK8	S	636	Cluster 5
Ctnna2;Ctnna1	Catenin alpha-2;Catenin alpha-1	P26231	T	658	Cluster 5
Huwe1	E3 ubiquitin-protein ligase HUWE1	Q7TMY8	S	2362	Cluster 5
Aldh18a1	Delta-1-pyrroline-5-carboxylate synthase;Glutamate 5-kinase;Gamma-glutamyl phosphate reductase	Q9Z110	S	79	Cluster 5
Zcchc6	Terminal uridylyltransferase 7	Q5BLK4	T	865	Cluster 5
Sobp	Sine oculis-binding protein homolog	Q0P5V2	S	627	Cluster 5
Hadha	Trifunctional enzyme subunit alpha, mitochondrial;Long-chain enoyl-CoA hydratase;Long chain 3-hydroxyacyl-CoA dehydrogenase	Q8BMS1	S	231	Cluster 5
Trpm7	Transient receptor potential cation channel subfamily M member 7	Q923J1	S	1300	Cluster 5
Eif4g1	Eukaryotic translation initiation factor 4 gamma 1	Q6NZJ6	S	1211	Cluster 5
Arl6ip4	ADP-ribosylation factor-like protein 6-interacting protein 4	Q9JM93	S	140	Cluster 5
Rab10	Ras-related protein Rab-10	P61027	T	73	Cluster 5
Vprbp	Protein VPRBP	Q80TR8	S	999	Cluster 5
Nes	Nestin	Q6P5H2	S	623	Cluster 5
Hdgfrp2	Hepatoma-derived growth factor-related protein 2	Q3UMU9-2	S	619	Cluster 5
Hdgfrp2	Hepatoma-derived growth factor-related protein 2	Q3UMU9-3	S	629	Cluster 5
Cfap97	Cilia- and flagella-associated protein 97	Q6ZPR1	S	8	Cluster 5
Farp1	FERM, RhoGEF and pleckstrin domain-containing protein 1	F8VPU2	T	419	Cluster 5
Nup98	Nuclear pore complex protein Nup98-Nup96;Nuclear pore complex protein Nup98;Nuclear pore complex protein Nup96	Q6PFD9	T	1771	Cluster 5
Srrm2	Serine/arginine repetitive matrix protein 2	Q8BTI8	S	1340	Cluster 5
Rock1	Rho-associated protein kinase 1	P70335	S	1105	Cluster 5
Fam65a	Protein FAM65A	Q68FE6	S	347	Cluster 5
Nktr	NK-tumor recognition protein;Putative peptidyl-prolyl cis-trans isomerase	P30415	S	1148	Cluster 5
Rab12	Ras-related protein Rab-12	P35283	S	105	Cluster 5
Ctnnd1	Catenin delta-1	P30999	S	352	Cluster 5
Ctnnd1	Catenin delta-1	P30999	S	349	Cluster 5
Ctnnd1	Catenin delta-1	P30999	S	346	Cluster 5
Dst	Dystonin	Q91ZU6	S	7336	Cluster 5
Dst	Dystonin	Q91ZU6	S	7333	Cluster 5
Irx1	Iroquois-class homeodomain protein IRX-1	P81068	S	241	Cluster 5
Cast	Calpastatin	P51125	S	324	Cluster 5
Ahnak		E9Q616	S	5519	Cluster 5
Ahnak		E9Q616	S	5525	Cluster 5
Evl	Ena/VASP-like protein	P70429	S	367	Cluster 5
Dkc1	H/ACA ribonucleoprotein complex subunit 4	Q9ESX5	S	451	Cluster 5
Dkc1	H/ACA ribonucleoprotein complex subunit 4	Q9ESX5	S	453	Cluster 5
Dkc1	H/ACA ribonucleoprotein complex subunit 4	Q9ESX5	S	455	Cluster 5
Nbr1	Next to BRCA1 gene 1 protein	P97432	S	657	Cluster 5
Actr2	Actin-related protein 2	P61161	T	117	Cluster 6
Pitx2	Pituitary homeobox 2	Q8BS64	S	64	Cluster 6
Pitx2	Pituitary homeobox 2	Q8BS64	S	60	Cluster 6
Etv6	Transcription factor ETV6	P97360	S	22	Cluster 6
Fam171a1		A2ATK9	S	360	Cluster 6
Fam171a1		A2ATK9	S	358	Cluster 6
Nup35	Nucleoporin NUP53	Q8R4R6	S	258	Cluster 6
Grb10	Growth factor receptor-bound protein 10	Q60760	S	96	Cluster 6
Stx8	Syntaxin-8	O88983	S	96	Cluster 6
Grb10	Growth factor receptor-bound protein 10	Q60760	S	104	Cluster 6
Chm		Q3UR39	S	165	Cluster 6
Cep170	Centrosomal protein of 170 kDa	Q6A065	S	1200	Cluster 6
Pola2	DNA polymerase alpha subunit B	P33611	S	126	Cluster 6
Cep170	Centrosomal protein of 170 kDa	Q6A065	S	1195	Cluster 6
Polr2a	DNA-directed RNA polymerase II subunit RPB1	P08775	S	1878	Cluster 6
Sipa1l1	Signal-induced proliferation-associated 1-like protein 1	Q8C0T5	S	1626	Cluster 6
Paxbp1	PAX3- and PAX7-binding protein 1	P58501	S	297	Cluster 6
Brwd1	Bromodomain and WD repeat-containing protein 1	Q921C3	S	697	Cluster 6
Mllt1		Q9ERL0	S	349	Cluster 6
Mllt1		Q9ERL0	S	347	Cluster 6
Map1b	Microtubule-associated protein 1B;MAP1B heavy chain;MAP1 light chain LC1	P14873	T	1784	Cluster 6
Snapc1	snRNA-activating protein complex subunit 1	Q8K0S9	S	311	Cluster 6
Ahnak2		F7DBB3	T	612	Cluster 6
Macf1	Microtubule-actin cross-linking factor 1	E9QA63	S	3085	Cluster 6
Macf1	Microtubule-actin cross-linking factor 1	E9QA63	S	3082	Cluster 6
Ap3d1	AP-3 complex subunit delta-1	O54774	S	784	Cluster 6
Lrch1	Leucine-rich repeat and calponin homology domain-containing protein 1	P62046	S	518	Cluster 6
Wdr81	WD repeat-containing protein 81	Q5ND34	S	1570	Cluster 6
Tjap1	Tight junction-associated protein 1	Q9DCD5	S	473	Cluster 6
Uckl1	Uridine-cytidine kinase-like 1	Q91YL3	S	539	Cluster 6
Pja2	E3 ubiquitin-protein ligase Praja-2	Q80U04	S	305	Cluster 6
Cxadr	Coxsackievirus and adenovirus receptor homolog	P97792	S	332	Cluster 6
Wdr81	WD repeat-containing protein 81	Q5ND34	S	829	Cluster 6
Nek1	Serine/threonine-protein kinase Nek1	P51954	S	1071	Cluster 6
Srek1ip1	Protein SREK1IP1	Q4V9W2	S	96	Cluster 6
Lin37	Protein lin-37 homolog	Q9D8N6	S	138	Cluster 6
Lin37	Protein lin-37 homolog	Q9D8N6	S	135	Cluster 6
Ercc5	DNA repair protein complementing XP-G cells homolog	P35689	S	705	Cluster 6
Plec	Plectin	Q9QXS1	S	4629	Cluster 6
Flna	Filamin-A	Q8BTM8	S	1518	Cluster 6
Prkd3;Prkd1	Serine/threonine-protein kinase D3;Serine/threonine-protein kinase;Protein kinase C;Serine/threonine-protein kinase D1	Q8K1Y2	S	734	Cluster 6
Smad2;Smad3;Smad9	Mothers against decapentaplegic homolog 2;Mothers against decapentaplegic homolog;Mothers against decapentaplegic homolog 3;Mothers against decapentaplegic homolog 9	Q9JIW5	T	136	Cluster 6
Ahnak		E9Q616	S	3022	Cluster 6
Srrm2	Serine/arginine repetitive matrix protein 2	Q8BTI8	S	1984	Cluster 6
Srrm2	Serine/arginine repetitive matrix protein 2	Q8BTI8	S	1982	Cluster 6
Srrm2	Serine/arginine repetitive matrix protein 2	Q8BTI8	T	1986	Cluster 6
Trip10	Cdc42-interacting protein 4	Q8CJ53	S	299	Cluster 6
Trip10	Cdc42-interacting protein 4	Q8CJ53	S	296	Cluster 6
Ftsj3	pre-rRNA processing protein FTSJ3	Q9DBE9	S	335	Cluster 6
Ccdc12	Coiled-coil domain-containing protein 12	Q8R344	S	165	Cluster 6
Dclk1	Serine/threonine-protein kinase DCLK1	Q80VB6	S	352	Cluster 6
Trim28	Transcription intermediary factor 1-beta	Q62318	S	26	Cluster 6
Trim28	Transcription intermediary factor 1-beta	Q62318	S	23	Cluster 6
G3bp1	Ras GTPase-activating protein-binding protein 1	P97855	S	149	Cluster 6
Rrp8	Ribosomal RNA-processing protein 8	Q9DB85	S	64	Cluster 6
Rrp8	Ribosomal RNA-processing protein 8	Q9DB85	S	62	Cluster 6
Zfp318		B0V2M3	S	205	Cluster 6
Zswim8	Zinc finger SWIM domain-containing protein 8	Q3UHH1	S	1158	Cluster 6
Dgkh	Diacylglycerol kinase	D3YXJ0	S	53	Cluster 6
Bmp2k	BMP-2-inducible protein kinase	Q91Z96	S	908	Cluster 6
Scarf2	Scavenger receptor class F member 2	P59222	S	692	Cluster 6
Phldb2	Pleckstrin homology-like domain family B member 2	Q8K1N2	T	546	Cluster 6
Spen	Msx2-interacting protein	A2ADB1	S	1373	Cluster 6
Ncoa5	Nuclear receptor coactivator 5	Q91W39	S	377	Cluster 6
Rabgef1	Rab5 GDP/GTP exchange factor	Q9JM13	S	390	Cluster 6
Clk1	Dual specificity protein kinase CLK1	P22518	S	139	Cluster 6
Jmjd1c	Probable JmjC domain-containing histone demethylation protein 2C	Q69ZK6	S	320	Cluster 6
Rprd2	Regulation of nuclear pre-mRNA domain-containing protein 2	Q6NXI6	S	504	Cluster 6
Usp34	Ubiquitin carboxyl-terminal hydrolase 34;Ubiquitin carboxyl-terminal hydrolase	Q6ZQ93	S	3396	Cluster 6
Usp34	Ubiquitin carboxyl-terminal hydrolase 34;Ubiquitin carboxyl-terminal hydrolase	Q6ZQ93	S	3395	Cluster 6
Kdm5c	Lysine-specific demethylase 5C	P41230	S	897	Cluster 6
2015-09-05	Septin-5	Q9Z2Q6	S	225	Cluster 6
Srsf11		E9Q6E5	S	14	Cluster 6
Srsf11		E9Q6E5	S	3	Cluster 6
Tkt	Transketolase	P40142	T	287	Cluster 6
Gatad2b	Transcriptional repressor p66-beta	Q8VHR5	S	123	Cluster 6
Arhgap17	Rho GTPase-activating protein 17	Q3UIA2	T	734	Cluster 6
Specc1	Cytospin-B	Q5SXY1	S	55	Cluster 6
Stk3	Serine/threonine-protein kinase 3;Serine/threonine-protein kinase 3 36kDa subunit;Serine/threonine-protein kinase 3 20kDa subunit	Q9JI10	S	316	Cluster 6
Kmt2d	Histone-lysine N-methyltransferase 2D;Histone-lysine N-methyltransferase	Q6PDK2	S	727	Cluster 6
Msh4	MutS protein homolog 4	Q99MT2	S	856	Cluster 6
Cdc42ep1	Cdc42 effector protein 1	Q91W92	T	34	Cluster 6
Kmt2a	Histone-lysine N-methyltransferase 2A;MLL cleavage product N320;MLL cleavage product C180	P55200	S	1860	Cluster 6
Camlg	Calcium signal-modulating cyclophilin ligand	P49070	S	53	Cluster 6
Tnrc18	Trinucleotide repeat-containing gene 18 protein	Q80WC3	S	917	Cluster 6
Tnrc18	Trinucleotide repeat-containing gene 18 protein	Q80WC3	S	921	Cluster 6
Fam102b	Protein FAM102B	Q8BQS4	S	329	Cluster 6
Wbp11	WW domain-binding protein 11	Q923D5	S	237	Cluster 6
Rictor	Rapamycin-insensitive companion of mTOR	Q6QI06	S	1468	Cluster 6
Sptbn1	Spectrin beta chain, non-erythrocytic 1	Q62261	S	2337	Cluster 6
Socs6	Suppressor of cytokine signaling 6	Q9JLY0	S	159	Cluster 6
Ywhaz	14-3-3 protein zeta/delta	P63101	S	64	Cluster 6
Zfhx3	Zinc finger homeobox protein 3	E9QMD3	S	2795	Cluster 6
RBM8;Rbm8a	RNA-binding protein 8A	A0A023T672	S	56	Cluster 6

## Sheet: TableS3B
Log2 wild type_1	Log2 wild type_2	Log2 wild type_3	Log2 wild type_4	Log2 A2016T_1	Log2 A2016T_2	Log2 A2016T_3	Log2 A2016T_4	t-test difference (wt-A2016T)	Gene names	Protein names	Protein	Amino acid	Position
-3.11863	-3.04673	-4.9201	-4.09422	-1.3886	-1.54725	-1.3993	-2.3985	-2.11151	Abcf1	ATP-binding cassette sub-family F member 1	Q6P542	S	103
-3.73537	-3.7074	-3.46742	-4.52418	-1.3886	-1.54725	-1.3993	-2.3985	-2.17518	Abcf1	ATP-binding cassette sub-family F member 1	Q6P542	S	107
-0.0320988	-0.4233	-0.2157	0.477701	0.999201	1.36665	1.5641	1.4732	-1.39914	Ahctf1	Protein ELYS	Q8CJF7	S	1381
1.4339	1.208	0.793001	0.774401	-0.474499	-0.326849	0.0314999	-0.2861	1.31631	Ahnak2		F7DBB3	S	909
-1.1308	-1.3839	-1.3127	-0.9123	0.0244007	-0.268549	0.0310993	-0.309101	-1.05439	Aif1l	Allograft inflammatory factor 1-like	Q9EQX4	S	134
1.714	1.12	1.7956	2.0031	2.935	3.02065	3.3691	3.3841	-1.51904	Akap12	A-kinase anchor protein 12	Q9WTQ5	S	652
0.737301	0.6098	0.8538	1.2603	1.7988	2.80165	2.3053	2.3197	-1.44106	Akap12	A-kinase anchor protein 12	Q9WTQ5	S	1292
1.8639	1.2663	1.769	2.2617	2.9014	3.51725	3.4035	3.613	-1.56856	Akap12	A-kinase anchor protein 12	Q9WTQ5	S	498
-2.0776	-2.5472	-2.1846	-1.5304	-0.5432	-0.935848	-0.614901	-0.636	-1.40246	Akap12	A-kinase anchor protein 12	Q9WTQ5	S	682
-2.0776	-2.5472	-2.1846	-1.5304	-0.5432	-0.935848	-0.614901	-0.636	-1.40246	Akap12	A-kinase anchor protein 12	Q9WTQ5	S	684
-2.9094	-2.87963	-3.66715	-3.37653	-0.00469971	0.189451	0.123499	0.0578003	-3.29969	Akap5	A-kinase anchor protein 5	D3YVF0	S	242
-3.17513	-3.38481	-3.43881	-2.7378	-0.520199	-0.29945	0.040699	-0.5511	-2.85162	Ano1	Anoctamin-1;Anoctamin	Q8BHY3	S	94
-2.262	-2.5432	-2.6687	-1.5601	0.924301	0.759352	0.833799	1.1483	-3.17494	Ano1	Anoctamin	F6R6E1	S	142
-0.203798	0.0280991	-0.121399	-0.404999	-0.935299	-1.34005	-1.1316	-1.3879	1.02319	Apbb2	Amyloid beta A4 precursor protein-binding family B member 2	Q9DBR4	S	123
-3.9895	-3.85999	-3.62867	-3.27811	-2.9017	-2.24895	-2.1564	-2.1834	-1.31645	Arap1	Arf-GAP with Rho-GAP domain, ANK repeat and PH domain-containing protein 1	Q4LDD4	S	183
3.6412	3.6198	3.5331	2.9384	2.2021	2.13895	2.4114	2.2633	1.17919	Arhgap1	Rho GTPase-activating protein 1	Q5FWK3	S	51
0.863602	0.808599	0.448999	0.4065	-0.172899	-0.497349	-0.510601	-0.4776	1.04654	Bag3	BAG family molecular chaperone regulator 3	Q9JLV1	S	270
0.863602	0.808599	0.448999	0.4065	-0.172899	-0.497349	-0.510601	-0.4776	1.04654	Bag3	BAG family molecular chaperone regulator 3	Q9JLV1	S	274
-4.29055	-4.47756	-3.48836	-3.445	-0.926699	-1.39065	-0.509701	-0.738001	-3.0341	Brca1	Breast cancer type 1 susceptibility protein homolog	P48754	T	1199
-0.964399	-1.2038	-1.1597	-1.455	-3.5767	-4.86479	-3.44272	-3.42265	2.63099	Brwd1	Bromodomain and WD repeat-containing protein 1	Q921C3	S	697
-4.376	-3.29486	-2.5725	-3.04945	-0.9028	-0.95175	-1.0856	-1.3546	-2.24951	Ccdc85a	Coiled-coil domain-containing protein 85A	Q5SP85	S	342
-4.10034	1.036	-3.12432	-3.42438	1.979	2.56235	2.1332	1.9818	-4.56735	Ccnk	Cyclin-K	O88874	S	325
-3.19808	1.036	-3.70141	-3.63367	1.979	2.56235	2.1332	1.9818	-4.53838	Ccnk	Cyclin-K	O88874	S	329
1.013	0.506399	0.730801	1.6212	2.4624	2.63445	2.5862	2.2934	-1.52626	Cdc20	Cell division cycle protein 20 homolog	Q9JJ66	T	70
-4.11518	-4.28154	-3.45905	-3.57411	-1.8949	-1.96065	-1.8493	-1.2144	-2.12766	Cdca3	Cell division cycle-associated protein 3	Q99M54	S	197
-3.76188	-3.98343	-3.21388	-4.35099	-1.8949	-1.96065	-1.8493	-1.2144	-2.09773	Cdca3	Cell division cycle-associated protein 3	Q99M54	S	207
2.2326	1.9899	1.8042	1.5036	0.442202	0.681751	0.752899	0.663099	1.24759	Cdk14	Cyclin-dependent kinase 14	O35495	S	24
-2.6089	-4.08112	-3.21764	-2.9576	-0.855099	-0.87225	-0.673	-0.7817	-2.4208	Cenpf		E9Q3P4	S	247
-4.43672	-4.6809	-3.59973	-3.24201	-2.3509	-1.04065	-1.2839	-0.7243	-2.6399	Cep152	Centrosomal protein of 152 kDa	A2AUM9	S	1561
-3.627	-3.62406	-3.17917	-4.11513	0.8281	0.974152	0.7467	-0.3904	-4.17598	Champ1	Chromosome alignment-maintaining phosphoprotein 1	Q8K327	S	448
0.0618	-0.0900002	1.283	-0.3498	-2.2596	-2.44705	-3.9857	-3.44402	3.26034	Chd1	Chromodomain-helicase-DNA-binding protein 1	P40201	S	1228
1.8399	-4.21502	-4.32087	-3.84647	3.1865	2.98565	3.0939	3.2839	-5.7731	Ckap4	Cytoskeleton-associated protein 4	Q8BMK4	S	19
-3.14283	-4.61272	-3.86043	-4.99533	-2.156	-1.71625	-1.9116	-2.0935	-2.18349	Dcaf6	DDB1- and CUL4-associated factor 6	Q9DC22	S	336
-0.8235	-0.6248	-0.3416	-0.607899	1.3476	0.387651	1.1739	1.0289	-1.58396	Dclk1	Serine/threonine-protein kinase DCLK1	Q80VB6	S	352
-3.16906	-3.66346	-4.23124	-4.2054	-1.3921	-2.00365	-1.4001	-1.6075	-2.21645	Dclk1	Serine/threonine-protein kinase DCLK1	Q80VB6	S	358
-3.93093	-3.95191	-3.26528	-3.19332	1.6506	1.47455	1.8115	1.4565	-5.18365	Ddx21	Nucleolar RNA helicase 2	Q9JIK5	S	244
0.932901	0.7901	0.98	1.2024	2.0596	1.90075	1.9759	2.2504	-1.07031	Dpysl2	Dihydropyrimidinase-related protein 2	O08553	T	514
-3.36182	-3.70022	-3.7009	-3.73463	-0.129999	-0.474049	0.0461998	-2.1785	-2.94031	Dstn	Destrin	Q9R0P5	S	24
-0.0665989	-0.791	-0.2129	0.341501	1.2104	1.17035	1.1453	1.5134	-1.44211	Ecm1	Extracellular matrix protein 1	Q61508	S	556
-1.6539	-2.1586	-2.1588	-1.214	-0.421799	-0.598949	-0.0647011	-0.0363998	-1.51586	Ect2	Protein ECT2	Q07139	T	359
-0.951799	-0.5434	-0.321199	-0.6061	-1.3768	-1.81155	-2.1341	-2.0994	1.24984	Exoc2	Exocyst complex component 2	Q9D4H1	S	426
-0.310499	0.1395	-0.9111	-0.4986	-2.0859	-1.51565	-1.7616	-1.6861	1.36714	F2r	Proteinase-activated receptor 1	P30558	S	423
-3.2024	-1.159	-3.00097	-4.16468	-0.2048	-0.31885	-0.0846004	-0.288801	-2.6575	Fam101b	Filamin-interacting protein FAM101B	Q5SVD0	S	84
-1.034	-0.5737	-0.878901	-1.3038	0.968801	0.804352	0.9345	0.598299	-1.77409	Fam110c	Protein FAM110C	Q8VE94	S	350
-3.1931	-2.6611	-3.2389	-3.5213	-0.5919	-0.58285	-1.4361	-1.4493	-2.13856	Fam110c	Protein FAM110C	Q8VE94	S	99
-3.73816	-3.06519	-3.13727	-3.33218	-0.393999	-0.589048	-1.1343	-0.928301	-2.55679	Fam92a1;Fam92a	Protein FAM92A1	Q8BP22	S	310
-4.11271	-3.17295	-2.91251	-3.41615	-0.393999	-0.589048	-1.1343	-0.928301	-2.64217	Fam92a1;Fam92a	Protein FAM92A1	Q8BP22	S	312
-4.42886	-3.80466	-3.10081	-3.59111	-1.7012	-2.00995	-1.7534	-1.4706	-1.99757	Fkbp15	FK506-binding protein 15;Peptidyl-prolyl cis-trans isomerase	Q6P9Q6	S	386
-4.8131	-3.44922	-3.41881	-1.4097	-0.6141	-0.445148	-0.5947	-0.5557	-2.7203	Flna	Filamin-A	Q8BTM8	S	860
-2.5429	-2.4587	-2.8088	-1.3366	0.827301	0.774752	0.3342	1.0295	-3.02819	Foxf1	Forkhead box protein F1	Q61080	S	334
0.795301	0.9013	0.9632	0.8053	-0.0222988	-0.195148	-0.1066	0.216099	0.893262	Gigyf1	PERQ amino acid-rich with GYF domain-containing protein 1	Q99MR1	S	413
-2.8866	-2.3705	-2.1224	-1.6374	-0.3801	-0.137449	-0.6084	-0.529301	-1.84041	Gpr126	G-protein coupled receptor 126	Q6F3F9	S	1159
-4.76168	-4.00214	-3.84369	-2.969	-0.9039	-0.993549	-1.417	-0.547201	-2.92871	Gprc5c		I7HPW4	S	434
0.268301	0.9737	1.5127	0.4023	-0.972799	-1.38745	-1.8453	-1.3304	2.17324	Grb14	Growth factor receptor-bound protein 14	Q9JLM9	S	86
-0.286299	-0.2735	-0.659399	0.192701	1.07	0.969051	1.1907	1.9633	-1.55489	Gtse1	G2 and S phase-expressed protein 1	Q8R080	S	434
-0.0928993	-0.2293	-0.7127	-0.9025	0.705502	0.99785	1.052	0.7043	-1.34926	Hecw1	E3 ubiquitin-protein ligase HECW1	Q8K4P8	S	68
-0.4783	-0.6784	-1.2716	-1.1991	0.4447	0.972551	0.741199	0.833599	-1.65486	Hecw1	E3 ubiquitin-protein ligase HECW1	Q8K4P8	S	1073
-0.494799	-0.334301	-0.344799	-0.617699	-1.4352	-1.38015	-1.3854	-1.1415	0.887663	Hic1	Hypermethylated in cancer 1 protein	Q9R1Y5	S	366
0.198	0.379	0.0550995	0.343401	-4.16136	-3.81716	-3.65568	-0.5744	3.29603	Hic1	Hypermethylated in cancer 1 protein	Q9R1Y5	S	313
-4.05006	-2.5294	-3.49614	-4.31184	0.6383	0.668152	0.982	1.1386	-4.45362	Hnrnpd	Heterogeneous nuclear ribonucleoprotein D0	Q60668	S	82
2.2996	1.7579	2.3959	2.446	3.2242	3.23955	3.4964	3.5077	-1.14211	Hp1bp3	Heterochromatin protein 1-binding protein 3	Q3TEA8	T	51
-0.2887	0.0235996	-0.3267	0.0790005	-3.13597	-4.04652	-3.21491	-3.00991	3.22363	Hsp90ab1	Heat shock protein HSP 90-beta	P11499	S	445
-0.759399	-1.0426	-0.6784	-1.2731	-2.1968	-1.92975	-2.1187	-1.9896	1.12034	Hsp90ab1	Heat shock protein HSP 90-beta	P11499	S	452
1.5742	1.4417	1.3656	1.3794	0.337101	0.43045	0.2927	0.452099	1.06214	Hspb6	Heat shock protein beta-6	Q5EBG6	S	157
0.884901	1.0993	0.438301	0.9179	-0.187599	-0.217449	-0.512001	-0.151501	1.10224	Itgb1	Integrin beta-1	P09055	T	777
-1.7405	-3.03686	-3.76888	-3.71677	-1.3173	-1.16505	-0.7376	-0.7484	-2.07367	Jcad	Junctional protein associated with coronary artery disease	Q5DTX6	S	954
1.5373	1.3594	1.3904	1.5634	0.1511	0.55805	0.7402	0.3391	1.01551	Jup	Junction plakoglobin	Q02257	S	182
-1.4666	-1.1594	-1.4534	-1.5464	-2.3212	-2.34395	-2.3306	-2.8047	1.04366	Kiaa1211;C530008M17Rik	Uncharacterized protein KIAA1211	Q5PR69	S	552
-4.26935	-4.10069	-3.53584	-3.49173	0.0328007	0.20685	-0.5567	-0.0629005	-3.75442	Kif11	Kinesin-like protein KIF11	Q6P9P6	T	925
-0.4802	-0.33	-0.4212	-0.659399	-3.32027	-2.92749	-3.48071	-4.42466	3.06558	Kif21b	Kinesin-like protein KIF21B;Kinesin-like protein	Q9QXL1	S	1150
-1.1562	-1.6892	-1.5658	-2.78215	0.4494	0.44095	0.449999	0.431	-2.24117	Kif4	Chromosome-associated kinesin KIF4	P33174	S	788
-0.1511	-0.7509	-0.648699	-0.243999	0.7969	1.50265	1.4942	1.8543	-1.86069	Limd1	LIM domain-containing protein 1	Q9QXD8	S	139
-0.176399	-0.753601	-0.2609	-1.4753	-3.31285	-4.40022	-4.20415	-1.8814	2.7831	Lmna	Prelamin-A/C;Lamin-A/C	P48678	S	617
-3.1765	-4.9407	-4.20881	-3.00844	1.9782	1.40495	1.5056	-2.7786	-4.36115	Lmna	Prelamin-A/C;Lamin-A/C	P48678	S	424
0.3971	0.808599	1.4179	0.0566998	-3.73808	-4.12975	-3.33672	-2.06766	3.98813	Lmna	Prelamin-A/C;Lamin-A/C	P48678	S	107
-4.0043	-2.4777	-3.30937	-4.0958	-2.0573	-1.49855	-1.3027	-1.7421	-1.82163	Lrrk2	Leucine-rich repeat serine/threonine-protein kinase 2	Q5S006	S	935
-3.75368	-4.02292	-3.87565	-2.50425	-0.474199	-0.533049	-0.0400009	-0.124599	-3.24616	Lysmd2	LysM and putative peptidoglycan-binding domain-containing protein 2	Q9D7V2	S	33
-1.5496	-3.93179	-3.16329	-3.16847	-0.818199	-0.953548	-0.645201	-0.8685	-2.13193	Maged2		Q9ER67	S	194
-3.75871	-3.42711	-3.4966	-3.62693	-1.2362	-1.31935	-1.4309	-1.4127	-2.22755	Map2	Microtubule-associated protein 2;Microtubule-associated protein	P20357	S	1537
-4.43566	-3.8262	-2.89083	-3.52271	-1.1891	-1.10585	-1.9729	-1.8095	-2.14951	Mecom	MDS1 and EVI1 complex locus protein EVI1	P14404	S	436
-0.781799	-0.798401	-0.636799	0.655701	-2.43725	-3.13372	-4.04517	-4.1478	3.05066	Mllt1		Q9ERL0	S	284
1.0763	0.499399	0.9953	1.0948	1.9132	2.09975	2.3192	2.4711	-1.28436	Mllt4	Afadin	Q9QZQ1	S	1275
-3.41796	-4.26923	-3.54082	-3.83904	-0.114698	-0.242249	-0.606001	-0.915701	-3.2971	Mpzl1	Myelin protein zero-like protein 1	Q3TEW6	S	210
-0.676199	-0.753	-0.3463	-0.6721	-3.64169	-3.55773	-2.73296	-3.86605	2.83771	Mrvi1	Protein MRVI1	Q9WUX5	S	370
2.2677	1.6121	1.8724	2.1076	-0.455999	0.249451	0.3841	0.4708	1.80286	Mrvi1	Protein MRVI1	Q9WUX5	S	264
2.3929	1.8879	1.735	2.39	3.3176	3.14825	3.5415	3.4654	-1.26674	Msh6	DNA mismatch repair protein Msh6	P54276	S	63
-3.40006	-3.88849	-3.90074	-3.1355	1.0618	1.02065	0.941799	0.8358	-4.54621	Mta3	Metastasis-associated protein MTA3	Q924K8	S	427
-2.42087	-3.61217	2.8948	-3.49382	3.0873	3.39225	3.9753	4.0036	-5.27263	Myo18a	Unconventional myosin-XVIIIa	Q9JMH9	S	140
-0.845499	-0.6439	-0.8731	-1.0411	-2.0762	-2.03065	-1.6129	-2.1642	1.12009	Nacad	NAC-alpha domain-containing protein 1	Q5SWP3	S	1125
3.7569	3.8131	3.3421	3.2922	2.2092	2.33265	2.6955	2.3401	1.15671	Nedd4l	E3 ubiquitin-protein ligase NEDD4-like	E9PXB7	S	449
-1.4031	-1.8908	-0.596199	-0.821299	-3.2624	-3.99467	-3.78687	-3.19859	2.38278	Nefm	Neurofilament medium polypeptide	P08553	S	715
-3.49362	-3.35763	-4.20194	-3.20094	-1.3532	-1.52995	-1.3566	-1.8396	-2.0437	Nkx3-2	Homeobox protein Nkx-3.2	P97503	S	73
0.814201	0.5728	0.448999	0.409401	-1.5371	-1.14685	-0.742599	-0.9554	1.65684	Npy1r	Neuropeptide Y receptor type 1	Q04573	S	367
0.776501	0.8034	1.5016	1.9054	2.6309	2.84995	2.5721	2.6979	-1.44099	Numa1		E9Q7G0	S	2059
-3.1162	-4.06608	-4.22559	-2.09694	-1.3581	-0.705448	-0.3055	-0.603201	-2.63314	Nup153		E9Q3G8	S	193
-1.1461	-0.6744	0.000600815	-0.6812	-3.37338	-2.60724	-4.57003	-3.70669	2.93906	Osbp	Oxysterol-binding protein 1	Q3B7Z2	S	377
-1.1461	-0.6744	0.000600815	-0.6812	-3.1475	-4.26857	-3.76273	-3.46128	3.03475	Osbp	Oxysterol-binding protein 1	Q3B7Z2	S	380
-3.75602	-3.52725	-3.57276	-3.86047	-0.9228	-0.695648	-0.823	-1.2282	-2.76171	P2ry14	P2Y purinoceptor 14	Q9ESG6	T	337
0.2029	2.3147	1.7699	1.5547	-1.3359	-0.977049	-0.8654	-0.187401	2.30199	Palld	Palladin	Q9ET54-4	S	723
0.708101	0.452499	0.2694	0.585001	-3.128	-3.07283	-3.04183	-4.6445	3.97554	Palld	Palladin	Q9ET54-4	S	737
-3.46276	-4.05758	-3.78647	-2.97488	0.6397	0.69985	0.946699	0.949999	-4.37948	Palld	Palladin	Q9ET54-4	S	740
-0.7281	-0.562201	-1.0365	-1.0563	1.1089	1.47915	1.6477	1.5096	-2.28211	Palmd	Palmdelphin	Q9JHU2	S	370
-4.03841	-3.43917	-2.92984	-3.72113	-0.201	-0.748949	-0.336201	-0.3097	-3.13318	Palmd	Palmdelphin	Q9JHU2	S	385
0.811602	-0.253	1.5637	0.6954	2.9984	2.96115	2.8873	3.3445	-2.34341	Palmd	Palmdelphin	Q9JHU2	S	278
-0.813999	-3.06993	-1.2543	-4.3216	0.397001	0.92955	1.2015	1.0337	-3.2554	Palmd	Palmdelphin	Q9JHU2	S	370
-0.813999	-3.60449	-1.2543	-3.87836	0.397001	0.92955	1.2015	1.0337	-3.27822	Palmd	Palmdelphin	Q9JHU2	S	375
-3.0217	-2.92603	-4.60794	-2.34748	-1.1615	-0.657349	-0.852301	-1.0724	-2.2899	Pcdh1		F7BJK1	S	1012
-0.259298	-0.193399	-0.4575	-0.4352	-1.0025	-1.39425	-1.4142	-1.4627	0.982063	Pdzrn3	E3 ubiquitin-protein ligase PDZRN3	Q69ZS0	S	775
0.936701	0.789499	1.9006	1.1057	-3.03424	-2.97759	-4.1485	-2.94386	4.45917	Peak1	Pseudopodium-enriched atypical kinase 1	Q69Z38	S	565
0.936701	0.789499	1.9006	1.1057	-3.51106	-4.96901	-4.2186	-4.50274	5.48348	Peak1	Pseudopodium-enriched atypical kinase 1	Q69Z38	S	569
2.5223	2.9472	3.1733	2.8996	-2.6848	0.239351	0.4839	0.809	3.17374	Pgm5	Phosphoglucomutase-like protein 5	Q8BZF8	S	122
-3.37527	-3.48365	-4.49163	-4.1284	0.999001	0.224751	-0.0834007	-0.215601	-4.10093	Phactr2	Phosphatase and actin regulator	B1AVN8	S	518
-1.2746	-1.4258	-1.8449	-1.0675	-4.09052	-2.95565	-2.9973	-2.7784	1.80227	Phldb1	Pleckstrin homology-like domain family B member 1	Q6PDH0	S	640
-1.0489	-0.5924	-0.5096	-0.574699	-2.1524	-2.49735	-1.7458	-2.0114	1.42034	Picalm	Phosphatidylinositol-binding clathrin assembly protein	Q7M6Y3	S	474
0.744902	-0.7048	0.152	-0.6399	-1.5717	-2.43375	-3.45698	-2.1768	2.29786	Piezo2	Piezo-type mechanosensitive ion channel component 2;Piezo-type mechanosensitive ion channel component	Q8CD54	S	856
-3.79493	-4.13689	-3.35007	-3.14063	-2.8885	0.630751	1.2719	1.0894	-3.63152	Pik3r4	Phosphoinositide 3-kinase regulatory subunit 4	Q8VD65	S	813
-3.2874	-4.0139	-4.77534	-3.83288	-0.864599	-0.485149	-0.667601	-0.694201	-3.29949	Plekhg1		F7C583	S	499
1.6313	1.5021	1.1421	0.728001	-3.30216	-4.21277	-4.2602	-2.68123	4.86497	Polr2a	DNA-directed RNA polymerase II subunit RPB1	P08775	S	1878
-1.7019	-1.9916	-1.7347	-1.2506	-2.97926	-3.09398	-3.8462	-3.35894	1.64989	Polr3c	DNA-directed RNA polymerase III subunit RPC3	Q9D483	S	205
3.146	3.1135	2.7989	3.1992	1.9953	2.23175	1.8491	1.9208	1.06516	Ppp1r13l	RelA-associated inhibitor	Q5I1X5	S	394
-3.26119	-5.30006	-4.80582	-3.06267	-1.5079	-1.39285	-1.405	-1.8955	-2.55712	Pqbp1	Polyglutamine-binding protein 1	Q91VJ5	S	245
-0.744799	-1.4907	-2.2982	-0.299299	1.2213	1.17425	0.6432	0.7838	-2.16389	Prpf40a	Pre-mRNA-processing factor 40 homolog A	Q9R1C7	S	881
-0.744799	-1.4907	-2.2982	-0.299299	1.2213	1.17425	0.6432	0.7838	-2.16389	Prpf40a	Pre-mRNA-processing factor 40 homolog A	Q9R1C7	S	884
-1.873	-1.5436	-1.3963	-1.0716	-2.94854	-4.09871	-3.05172	-3.13033	1.8362	Prpf4b	Serine/threonine-protein kinase PRP4 homolog	Q61136	S	180
0.756102	0.543699	0.3743	0.333601	-1.2701	-1.12085	-1.323	-0.6856	1.60181	Prrx1	Paired mesoderm homeobox protein 1	P63013	S	21
1.8928	2.3131	2.1688	1.7235	-0.535599	0.205751	-0.378401	-0.360401	2.29171	Prune2	Protein prune homolog 2	Q52KR3	S	2638
2.9394	2.9729	3.4764	3.8222	1.6527	2.25045	2.0031	1.7027	1.40049	Prune2	Protein prune homolog 2	Q52KR3	S	1876
-2.70044	-3.1844	-3.31945	-4.65045	-1.2172	-1.56675	-0.971901	-1.6134	-2.12137	Psen1	Presenilin-1;Presenilin-1 NTF subunit;Presenilin-1 CTF subunit;Presenilin-1 CTF12	P49769	S	371
-3.33087	-3.22523	-4.05828	-3.13887	-0.993198	-2.35995	-1.5825	-1.1246	-1.92325	Ptrf	Polymerase I and transcript release factor	O54724	S	14
-3.3645	-3.20018	-3.30936	-4.85439	-0.993198	-2.35995	-1.5825	-1.1246	-2.16705	Ptrf	Polymerase I and transcript release factor	O54724	S	20
-0.707998	0.0825005	-1.0803	-0.519499	1.229	0.516251	1.2728	1.0317	-1.56876	Rab10	Ras-related protein Rab-10	P61027	T	73
-2.6896	-3.179	-3.5094	-4.00264	-1.4439	-1.49275	-1.1115	-1.2771	-2.01385	Rab13	Ras-related protein Rab-13	Q9DD03	S	178
1.5938	1.2663	1.4973	1.3655	0.449501	0.160151	0.116301	0.335499	1.16536	Rbpms2	RNA-binding protein with multiple splicing 2	Q8VC52	S	18
-3.0164	-3.897	-3.26061	-3.3521	-1.7312	-1.57305	-2.0922	-1.0143	-1.77884	Rictor	Rapamycin-insensitive companion of mTOR	Q6QI06	S	1187
-0.359299	-0.0125999	1.0165	-0.6068	-3.98005	-2.38069	-4.02614	-4.36332	3.697	Rplp2	60S acidic ribosomal protein P2	P99027	S	79
-2.6972	-3.22572	-3.69632	-3.6495	-0.755499	-0.886648	-0.9723	-1.306	-2.33707	Rps6kc1	Ribosomal protein S6 kinase delta-1	Q8BLK9	S	634
-2.4667	-1.6029	-2.52573	-1.8562	-0.8673	-0.573648	-0.2973	-0.3433	-1.5925	Rspo3	R-spondin-3	Q2TJ95	S	243
-3.84755	-4.43387	-3.0249	-1.8713	-0.0877991	-0.664749	-0.7232	0.6117	-3.07839	Sec16b	Protein transport protein Sec16B	Q91XT4	S	53
1.553	1.494	1.196	2.3554	-3.80233	0.854752	-3.64683	-4.04551	4.30958	Setd1b	Histone-lysine N-methyltransferase SETD1B	Q8CFT2	T	1914
-2.9836	-3.6916	-3.4175	-3.024	-2.2358	-2.11035	-2.0118	-1.63	-1.28219	Setd2	Histone-lysine N-methyltransferase SETD2	E9Q5F9	T	2029
-0.402899	-0.5382	-0.5917	-1.3796	-2.99305	-4.23898	-3.30681	-3.56134	2.79695	Sf3b1	Splicing factor 3B subunit 1	Q99NB9	S	129
-0.402899	-0.5382	-0.5917	-1.3796	-2.50897	-2.64261	-3.94365	-3.00683	2.29742	Sf3b1	Splicing factor 3B subunit 1	Q99NB9	T	142
0.245901	-0.112	0.289	1.0731	1.6052	1.91345	1.8649	1.7082	-1.39894	Sh3bp5l	SH3 domain-binding protein 5-like	Q99LH9	S	377
5.2924	5.6573	5.4326	5.2919	4.4123	4.19305	4.4052	4.3861	1.06939	Sh3kbp1	SH3 domain-containing kinase-binding protein 1	Q8R550-3	S	550
-0.1334	-0.3594	-0.4067	-0.640099	-4.08469	-3.11934	-3.50227	-3.04019	3.05172	Sh3pxd2a	SH3 and PX domain-containing protein 2A	O89032	S	643
-2.0984	-1.1549	-2.2724	-1.693	-0.6721	-0.0175495	-0.288101	0.2822	-1.63079	Shroom1	Protein Shroom1	Q5SX79	S	224
-1.1715	-1.3792	-0.665199	-0.855	-3.63872	-3.19998	-4.15153	-2.0521	2.24286	Shroom4	Protein Shroom4	Q1W617	T	478
0.8328	0.5364	0.477501	0.512901	-0.4305	-0.727348	-0.6078	-0.206301	1.08289	Shroom4	Protein Shroom4	Q1W617	T	583
0.151001	0.149599	0.454401	0.0785007	-1.0472	-0.956249	-0.8032	-0.746601	1.09669	Sipa1l2	Signal-induced proliferation-associated 1-like protein 2	Q80TE4	S	1478
1.8265	1.7771	1.5403	1.6559	0.872501	0.79565	0.612801	0.4151	1.02594	Sipa1l3		G3X9J0	S	1358
-1.9708	-3.66843	-3.88866	-3.5771	-1.2724	-1.06675	-1.5434	-0.997101	-2.05633	Skap2	Src kinase-associated phosphoprotein 2	Q3UND0	S	47
-0.757898	-1.4222	-1.05	-0.8393	0.400501	-0.00194931	0.3438	0.4277	-1.30986	Slain2	SLAIN motif-containing protein 2	Q8CI08-2	S	354
-0.757898	-1.4222	-1.05	-0.8393	0.400501	-0.00194931	0.3438	0.4277	-1.30986	Slain2	SLAIN motif-containing protein 2	Q8CI08-2	S	358
-3.6194	-4.82217	-4.39243	-4.06879	-1.8165	-1.91545	-1.9635	-2.1677	-2.25991	Slc12a2	Solute carrier family 12 member 2	P55012	S	933
1.651	1.9564	2.0832	1.9046	0.9895	0.966652	1.0558	0.6835	0.974937	Sorbs1		E9QNA7	S	346
-3.91314	-3.97147	-4.85688	-3.42548	-0.6019	-0.392149	-0.4562	-0.475	-3.56043	Sorbs2		D3Z080	S	422
-0.0338001	0.593399	0.9242	-0.122599	2.108	2.44355	2.9473	3.1851	-2.33069	Sorbs2		D3Z080	S	403
-1.6817	-1.6692	-1.3856	-1.6827	0.653101	0.42135	0.451399	0.420099	-2.09129	Sorbs2		D3Z080	S	330
-1.6817	-1.6692	-1.3856	-1.6827	0.653101	0.42135	0.451399	0.420099	-2.09129	Sorbs2		D3Z080	S	332
-4.04591	-2.97785	-3.68576	-2.9766	-0.8829	-0.955349	-0.951799	-0.866501	-2.50739	Sorbs2		D3Z080	S	442
-3.62397	-4.02412	-3.12218	-2.9766	-0.8829	-0.955349	-0.951799	-0.866501	-2.52258	Sorbs2		D3Z080	S	445
-4.277	-3.67255	-3.94005	-2.9766	-0.8829	-0.955349	-0.951799	-0.866501	-2.80241	Sorbs2		Q3UTJ2-2	S	493
-4.34559	-3.95364	-3.03114	-2.9766	-0.8829	-0.955349	-0.951799	-0.866501	-2.66261	Sorbs2		Q3UTJ2-2	S	496
-1.1381	-0.4266	-1.386	-1.778	-3.52262	-2.98915	-2.2699	-2.9989	1.76297	Spag9	C-Jun-amino-terminal kinase-interacting protein 4	Q58A65-2	S	203
0.8925	0.894899	0.8484	0.694	-1.1734	-1.38255	-0.672001	-1.1353	1.92326	Spata13	Spermatogenesis-associated protein 13	E9Q3I3	S	670
-2.9433	-2.6492	-1.8529	-2.2944	-4.69025	-4.14549	-4.85722	-3.7675	1.93016	Spata13		E9Q3I3	S	226
0.196301	-0.6485	-0.2514	-0.374399	-1.6652	-1.43265	-1.8379	-2.0992	1.48924	Spp1	Osteopontin	P10923	S	283
0.196301	-0.6485	-0.2514	-0.374399	-1.6652	-1.43265	-1.8379	-2.0992	1.48924	Spp1	Osteopontin	P10923	S	290
-3.33943	-1.8964	-4.14711	-2.60524	-1.2868	-0.851648	-0.7229	-0.6126	-2.12856	Srrm2	Serine/arginine repetitive matrix protein 2	Q8BTI8	S	1378
-3.00785	-3.62674	-4.37886	-3.73845	-1.8596	-2.55595	-1.4719	-1.4682	-1.84906	Srrm2	Serine/arginine repetitive matrix protein 2	Q8BTI8	S	851
-3.26367	-3.13805	-4.0968	-3.37627	-0.5611	-0.00364876	0.1548	-0.3578	-3.27676	Srsf11		F6RDI8	S	348
-1.8179	-2.4912	-2.986	-1.8456	-0.652399	-0.985048	-0.5714	-0.566601	-1.59131	Srsf11		F6RDI8	S	383
-1.8179	-2.4912	-2.986	-1.8456	-0.652399	-0.985048	-0.5714	-0.566601	-1.59131	Srsf11		F6RDI8	S	385
-1.8179	-2.4912	-2.986	-1.8456	-0.652399	-0.985048	-0.5714	-0.566601	-1.59131	Srsf11		F6RDI8	S	387
1.2613	0.860199	1.0508	1.3909	2.2217	2.02765	2.3431	2.5448	-1.14351	Ssh1	Protein phosphatase Slingshot homolog 1	Q76I79	S	929
-0.7008	-0.3272	-1.4269	-0.711699	-4.85166	-2.54058	-3.62671	-2.8732	2.68139	Stk24;Stk25	Serine/threonine-protein kinase 24;Serine/threonine-protein kinase 24 35 kDa subunit;Serine/threonine-protein kinase 24 12 kDa subunit;Serine/threonine-protein kinase 25	Q99KH8	T	178
-3.97993	-3.87923	-3.72872	-3.6816	-2.5371	-2.74075	-2.2916	-2.2833	-1.35418	Ston1	Stonin-1	Q8CDJ8	S	189
-4.04283	-3.9064	-3.05475	-2.85679	-1.1519	-0.780449	-0.5753	-1.0723	-2.57021	Susd5		G3UW60	S	321
-0.0352993	0.227699	0.419201	0.0573997	-0.774799	-1.25615	-1.0841	-0.893499	1.16939	Svil	Supervillin	Q8K4L3	S	510
0.00330162	0.517099	0.146801	-0.375	-1.9846	-1.29605	-1.4089	-1.1035	1.52131	Sync	Syncoilin	Q9EPM5	S	3
-2.115	-2.5199	-2.3883	-1.5544	-0.8722	-0.444948	-0.4394	-0.2796	-1.63536	Synpo		E9Q3E2	S	1007
0.678902	-0.2146	-0.034399	0.7661	1.5503	2.09635	2.1064	1.7176	-1.56866	Synpo		E9Q3E2	S	1002
0.678902	-0.2146	-0.034399	0.7661	1.5503	2.09635	2.1064	1.7176	-1.56866	Synpo		E9Q3E2	S	1007
-3.79517	-0.1266	-3.69569	-2.68019	0.877701	0.704351	0.8221	0.7316	-3.35835	Synpo		E9Q3E2	S	988
-4.04218	-0.1266	-3.46901	-3.18533	0.877701	0.704351	0.8221	0.7316	-3.48972	Synpo		E9Q3E2	S	975
1.3503	0.744299	0.756701	1.3691	2.1375	2.09955	2.7782	2.8794	-1.41856	Synpo		E9Q3E2	S	824
1.3503	0.744299	0.756701	1.3691	2.1375	2.09955	2.7782	2.8794	-1.41856	Synpo		E9Q3E2	S	828
1.0888	1.1695	0.8368	1.053	-0.470098	-0.49885	-0.5755	-0.130199	1.45569	Tbc1d1	TBC1 domain family member 1	Q60949	S	660
-0.308199	-0.244301	0.205601	-0.2621	-4.41768	-2.77644	-2.75567	-3.89688	3.30942	Tbc1d10b	TBC1 domain family member 10B	Q8BHL3	S	129
-4.36143	-3.9557	-3.6191	-2.49739	0.666801	0.662352	0.3384	0.636299	-4.18437	Tbx3	T-box transcription factor TBX3	P70324	S	438
-1.2847	-1.6752	-1.116	-1.0568	-2.1124	-2.75725	-2.5481	-2.6483	1.23334	Tcf20	Transcription factor 20	Q9EPQ8	S	1819
0.850801	0.9231	1.5251	1.8905	-2.85023	-2.96044	-2.94981	-3.39786	4.33696	Tdp1	Tyrosyl-DNA phosphodiesterase 1	Q8BJ37	S	61
-0.823099	-1.312	-1.3929	-2.1271	-2.96081	-3.39763	-2.96753	-2.78864	1.61488	Thsd1	Thrombospondin type-1 domain-containing protein 1	Q9JM61	S	670
-3.41843	-4.69266	-4.70619	-3.87397	-1.475	-1.60895	-1.8135	-1.4362	-2.5894	Tln1	Talin-1	P26039	S	979
0.4981	0.419199	0.224201	0.5408	-2.40895	-4.22746	-3.5387	-3.89969	3.93927	Tns1		A0A087WQS0	T	1539
0.937302	0.7878	0.813601	0.426701	-0.7992	-0.245749	-0.4662	-0.399	1.21889	Tpm1		B7ZNL3	S	87
2.8497	2.2395	1.6542	2.2523	0.4708	1.05205	0.594099	0.7575	1.53031	Trip10	Cdc42-interacting protein 4	Q8CJ53	S	482
1.9202	1.628	1.4082	3.1258	4.3367	4.33165	3.9646	3.6628	-2.05339	Trp53i11	Tumor protein p53-inducible protein 11	Q4QQM4	S	14
-3.33943	-3.37792	-3.31311	-3.49363	-0.285999	-0.74255	-0.277901	0.264799	-3.12061	Usp34	Ubiquitin carboxyl-terminal hydrolase 34;Ubiquitin carboxyl-terminal hydrolase	Q6ZQ93	S	2525
0.4566	0.0844994	0.1453	0.133301	1.3672	1.31675	1.3736	2.0106	-1.31211	Vim	Vimentin	P20152	S	7
-2.259	-4.02544	-4.09426	-2.9226	-0.5569	-0.18565	0.1015	0.00589943	-3.16654	Vmp1	Vacuole membrane protein 1	Q99KU0	S	23
-3.4071	-3.1854	-2.9814	-3.09836	-0.9184	-1.00505	-1.13	-1.0081	-2.15268	Wiz	Protein Wiz	O88286	T	1049
-3.60343	-3.1921	-3.202	-1.0858	-0.4112	-0.776449	-0.201401	-0.151501	-2.38569	Wrnip1	ATPase WRNIP1	Q91XU0	S	65
-1.8352	-3.4572	-2.4925	-2.0399	-0.3748	-0.64255	-0.4212	-0.4235	-1.99069	Wwc1	Protein KIBRA	Q5SXA9	S	939
