# Supplementary figures and images for: Phosphoproteomics reveals that Parkinson's disease kinase LRRK2 regulates a subset of Rab GTPases
Source: eLife journal article supplement (doi:10.7554/elife.12813), 2016-01-28

A

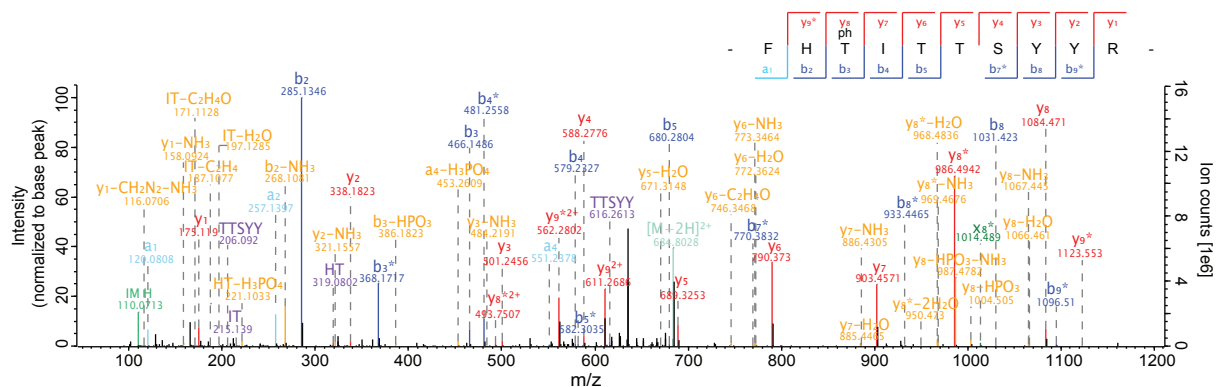

Synthetic peptide

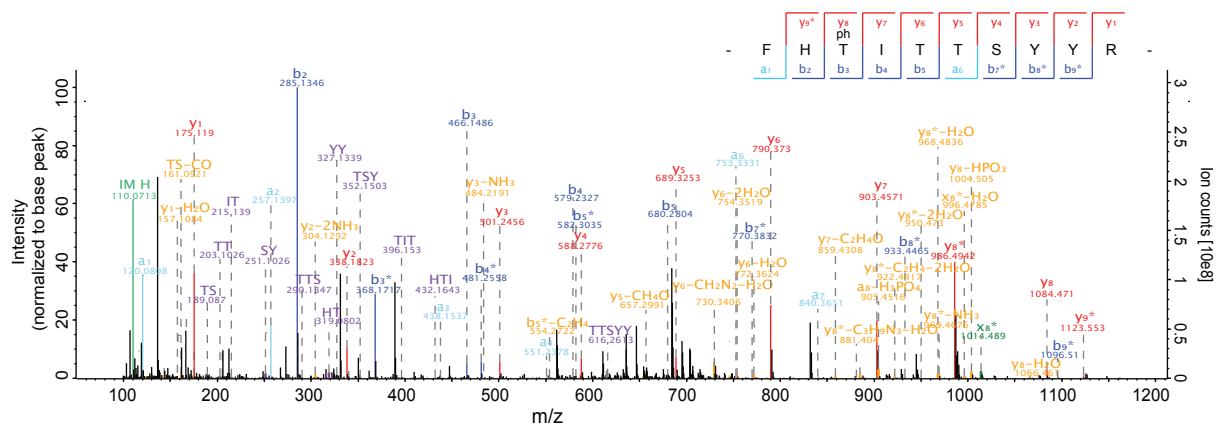

B

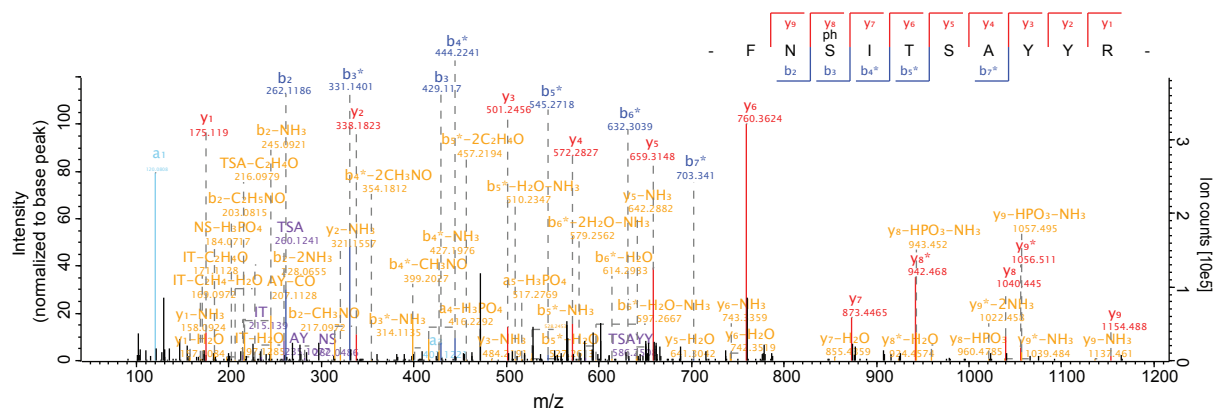

Synthetic peptide

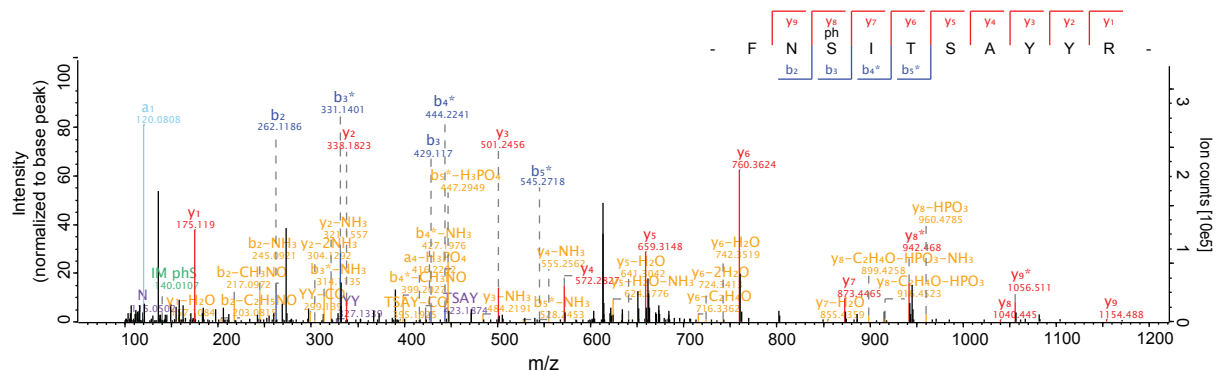

Supplement: supp [file elife-12813-supp-v1.zip]

A

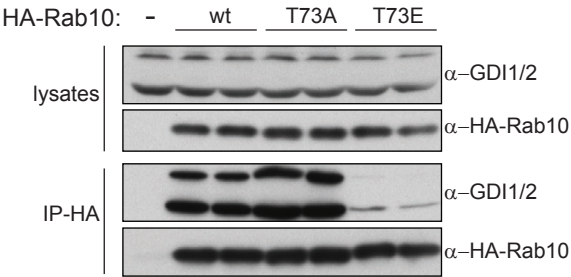

B

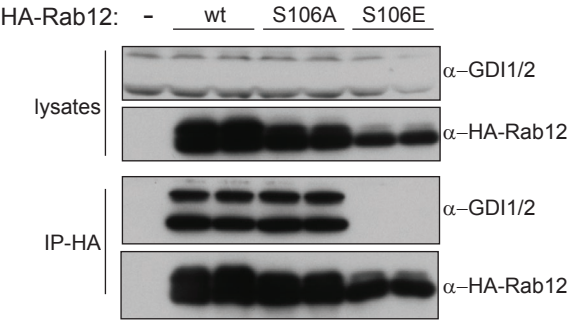

Supplement: supp [file elife-12813-supp-v1.zip]

Figure1-figure supplement 1

A

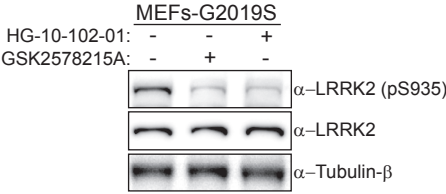

B

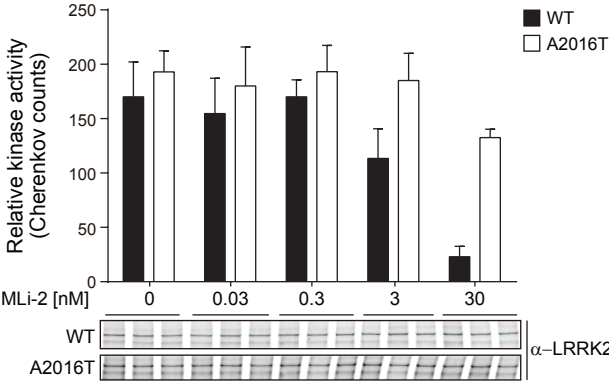

C

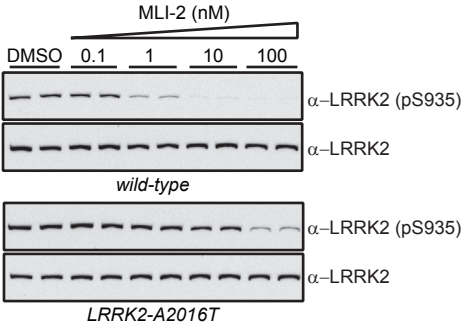

D

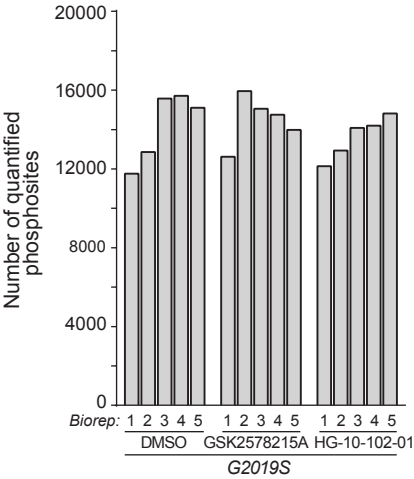

E

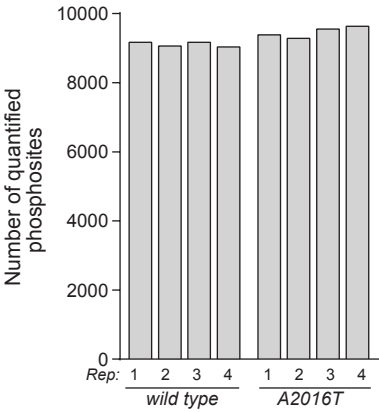

F

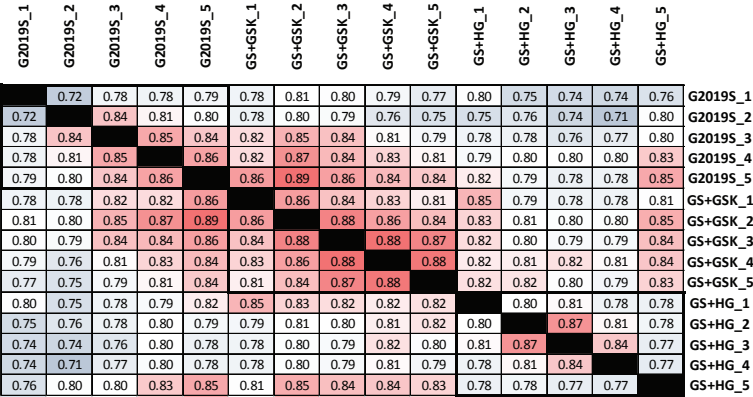

G

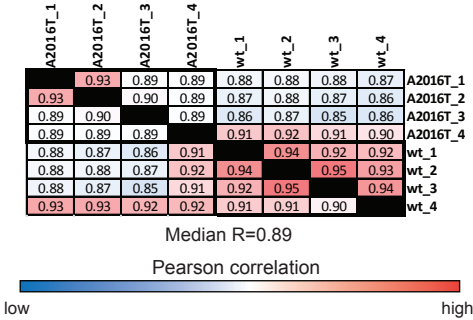

Supplement: supp [file elife-12813-supp-v1.zip]

A

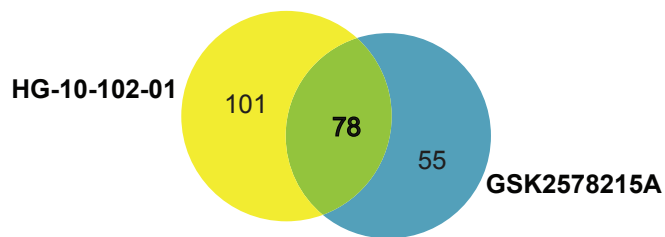

B

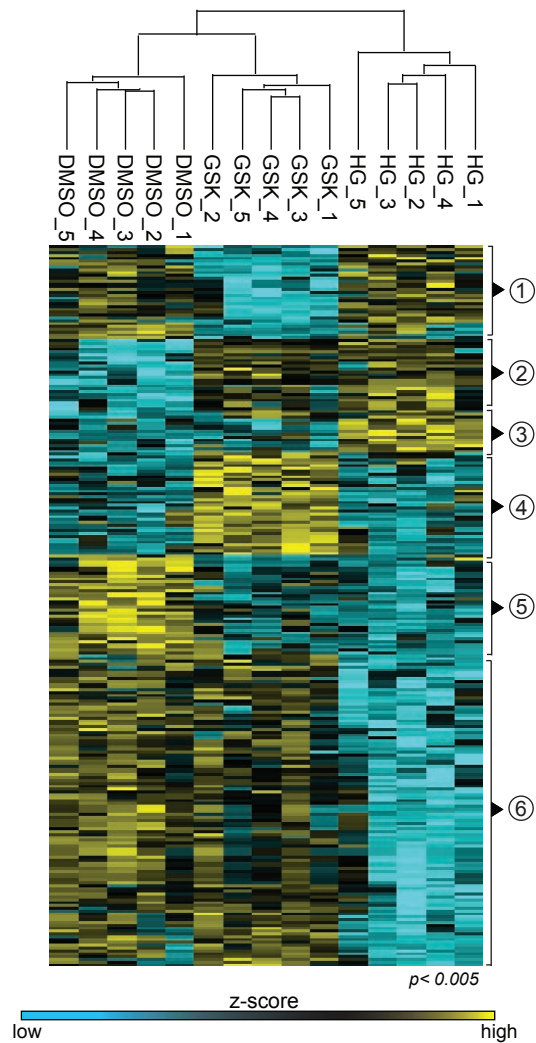

C

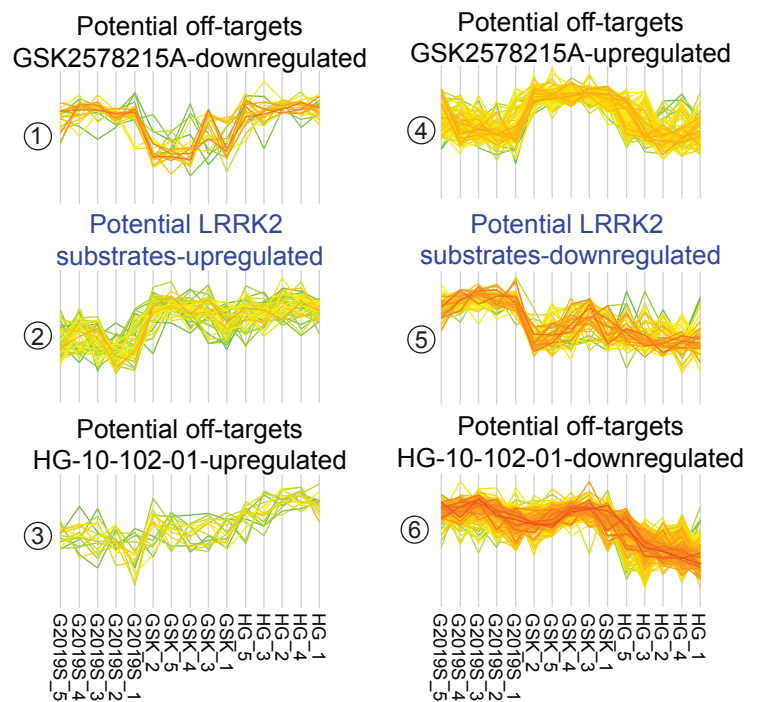

D

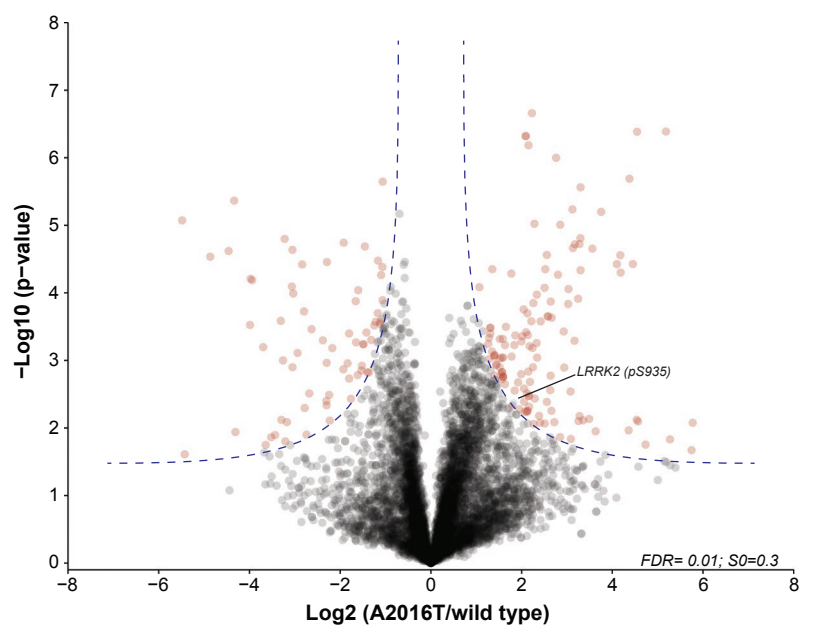

Supplement: supp [file elife-12813-supp-v1.zip]

Figure 5-figure supplement 2

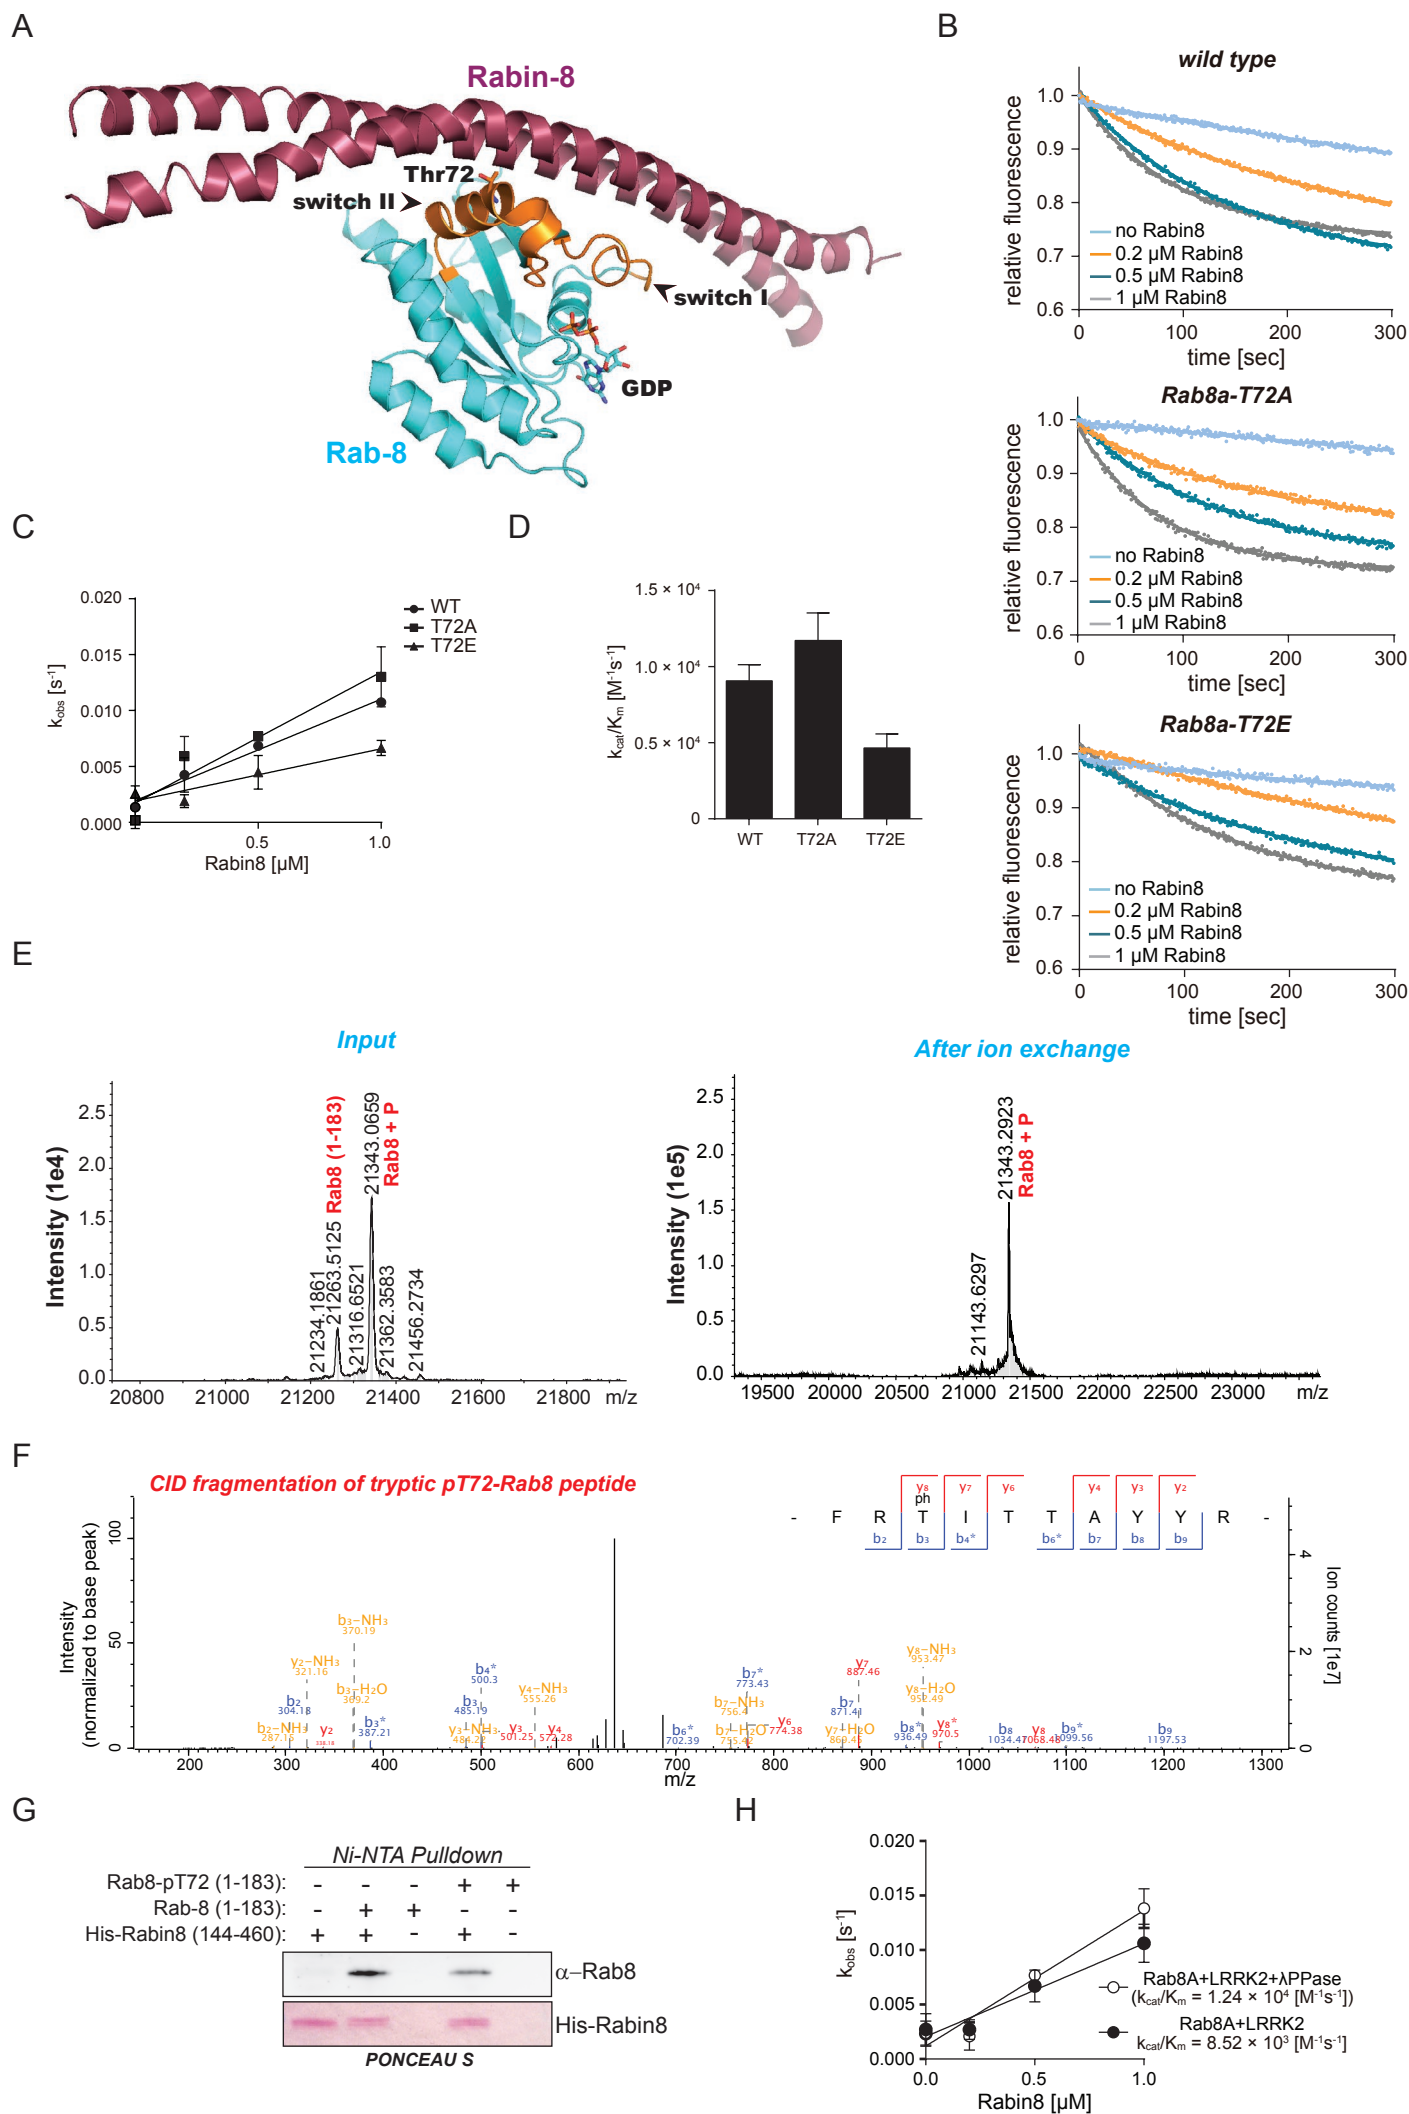

Supplement: supp [file elife-12813-supp-v1.zip]

A

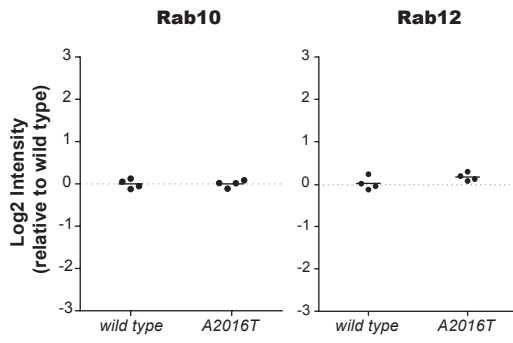

B

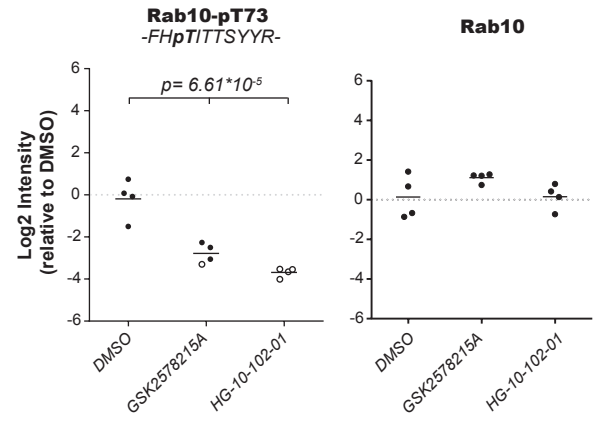

C

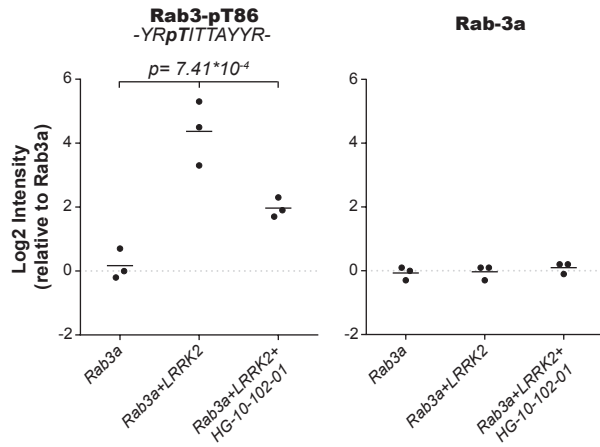

D

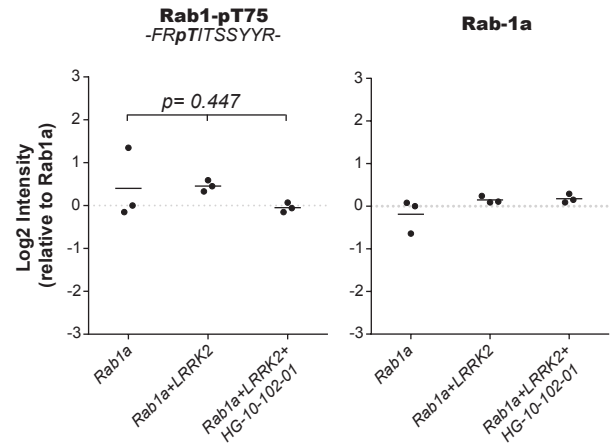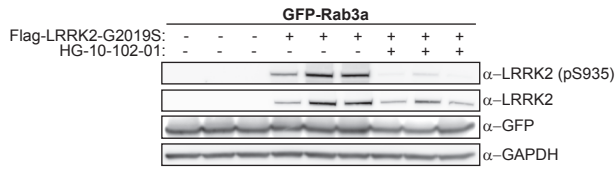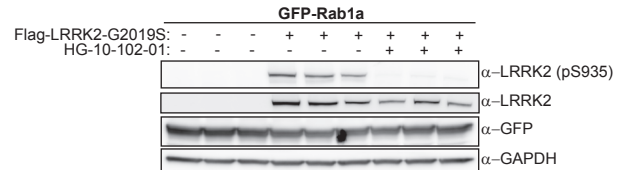

E

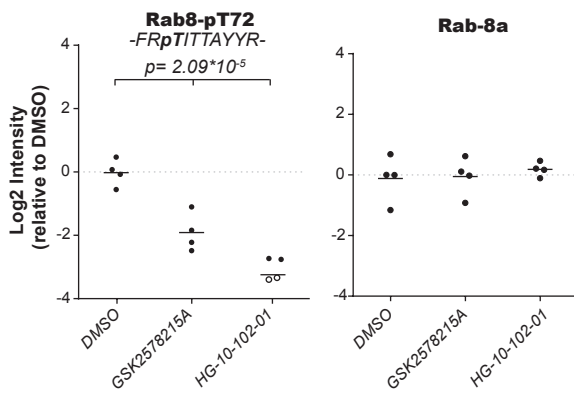

F

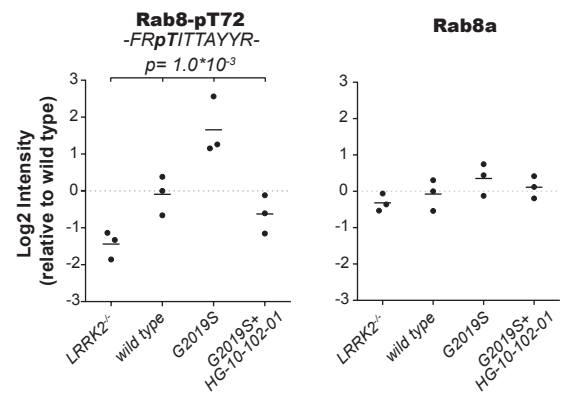

G

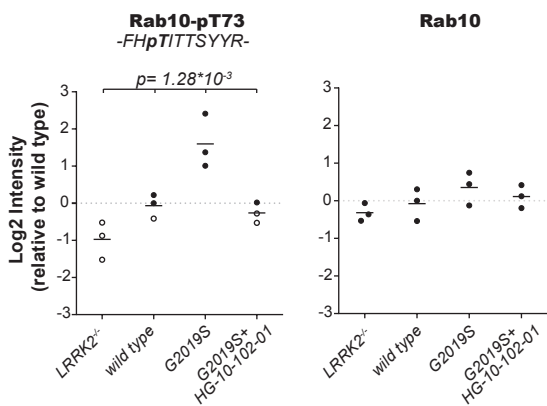

H

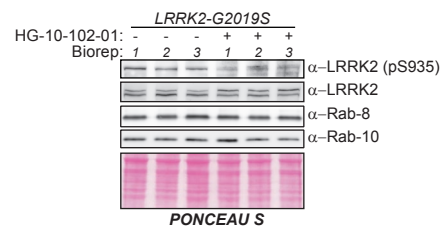

I

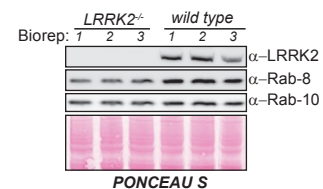

Supplement: supp [file elife-12813-supp-v1.zip]

Figure 5-figure supplement 1

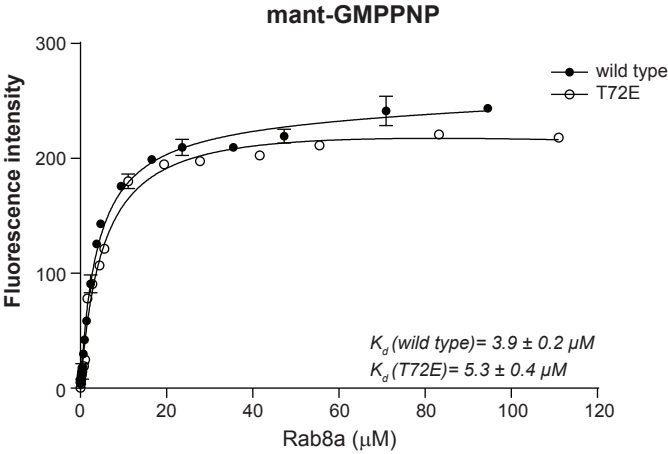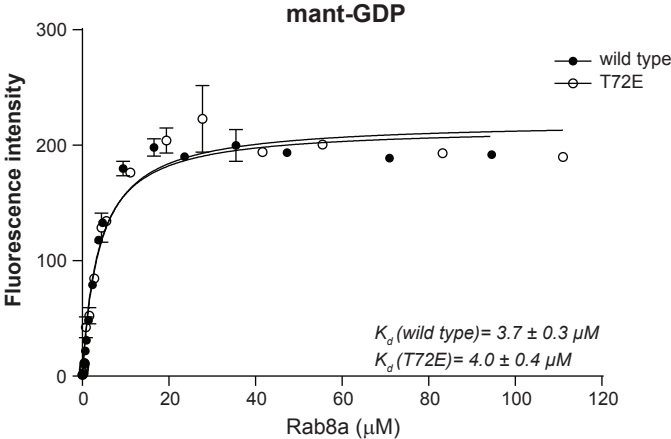

Supplement: supp [file elife-12813-supp-v1.zip]

A

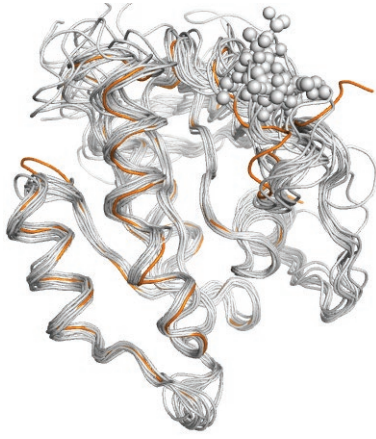

B

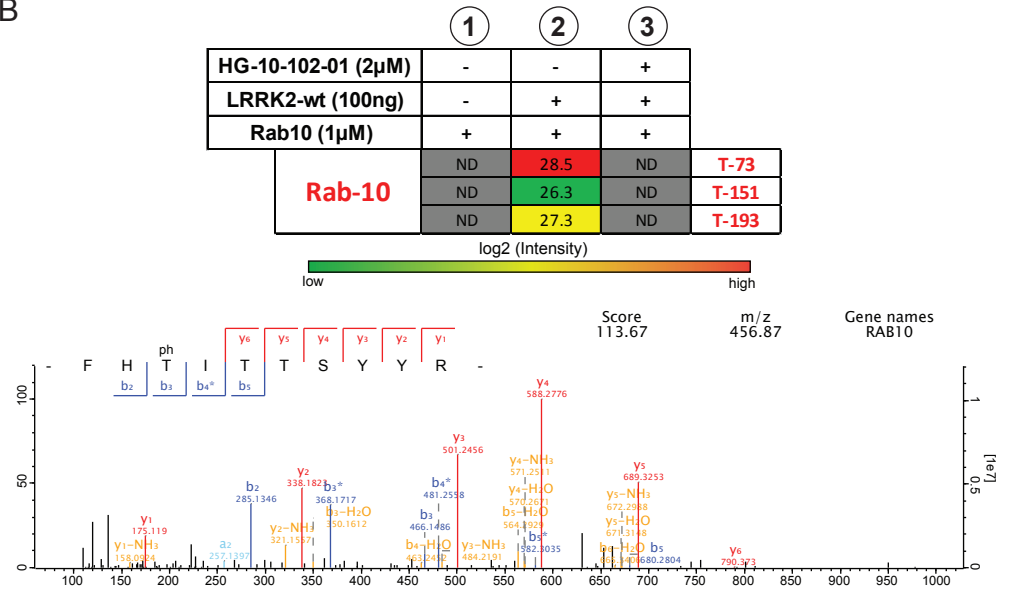

C

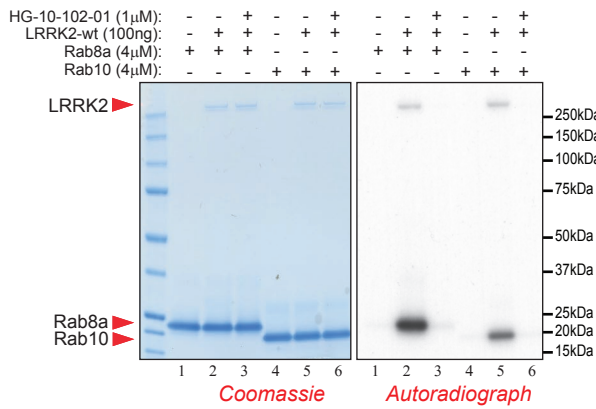

D

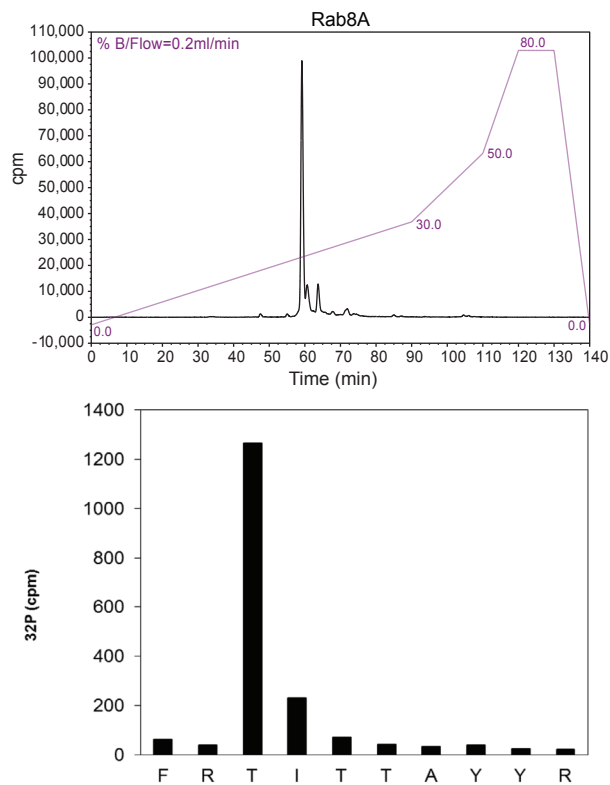

E

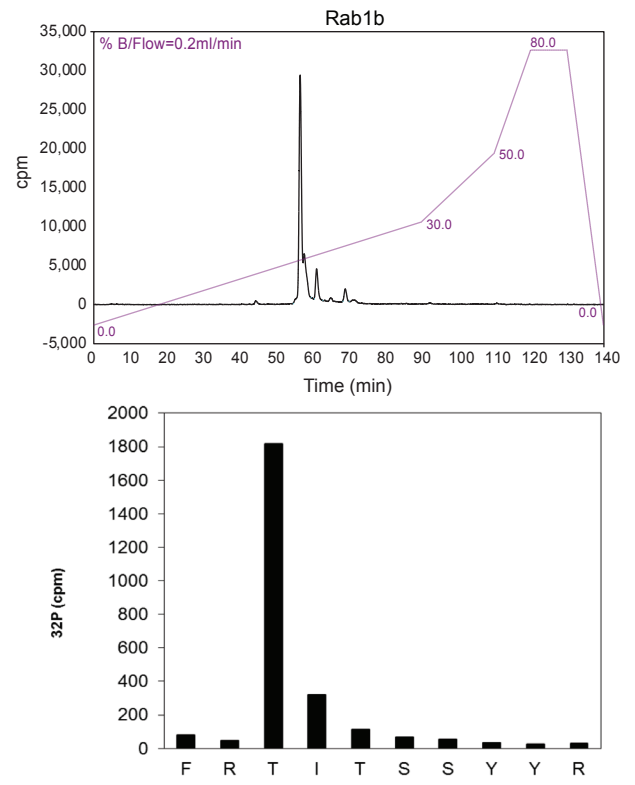

Supplement: supp [file elife-12813-supp-v1.zip]

A

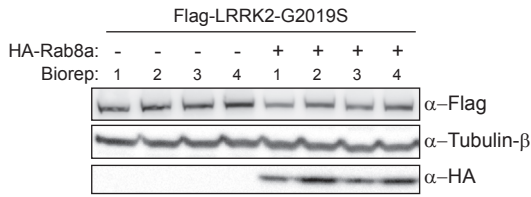

B

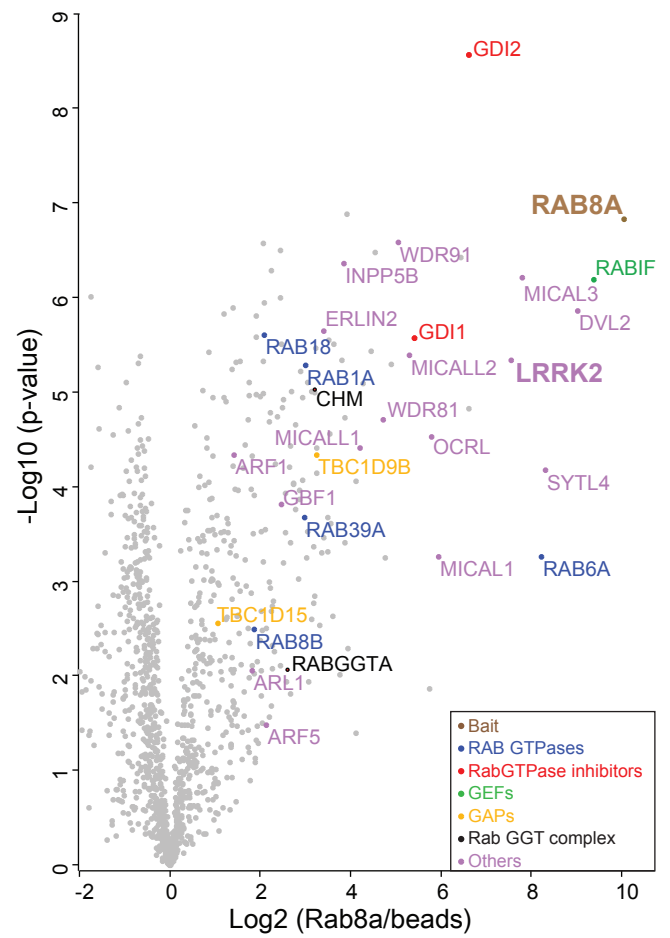

C

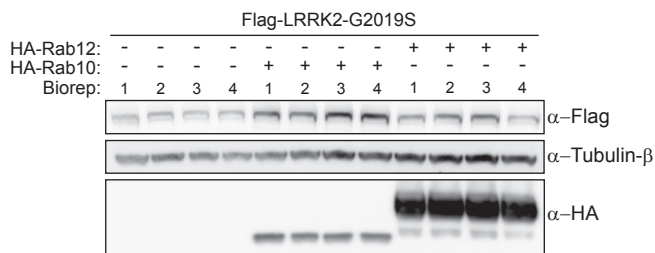

E

D

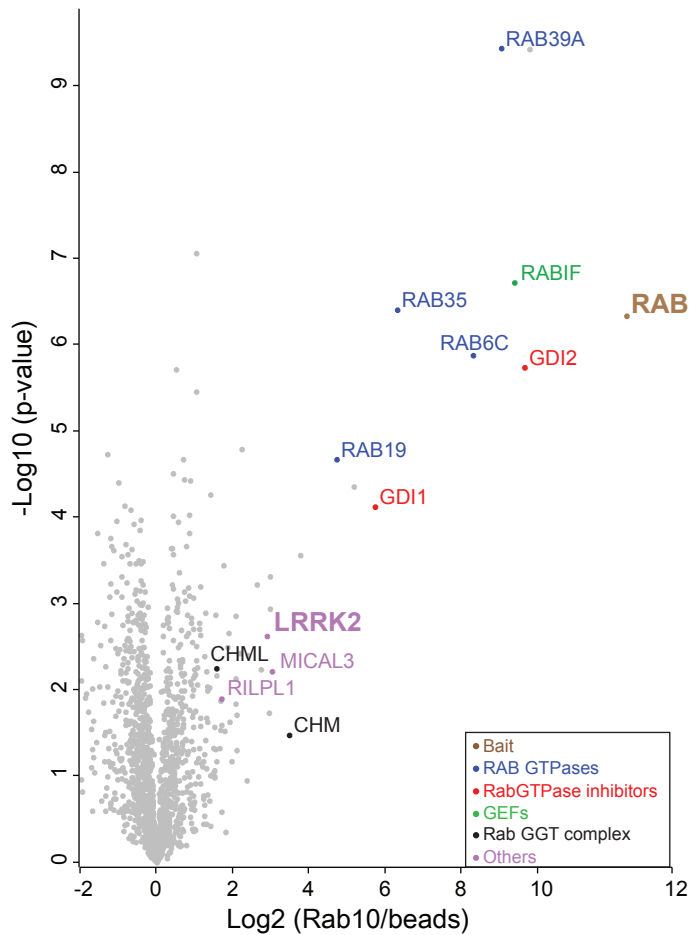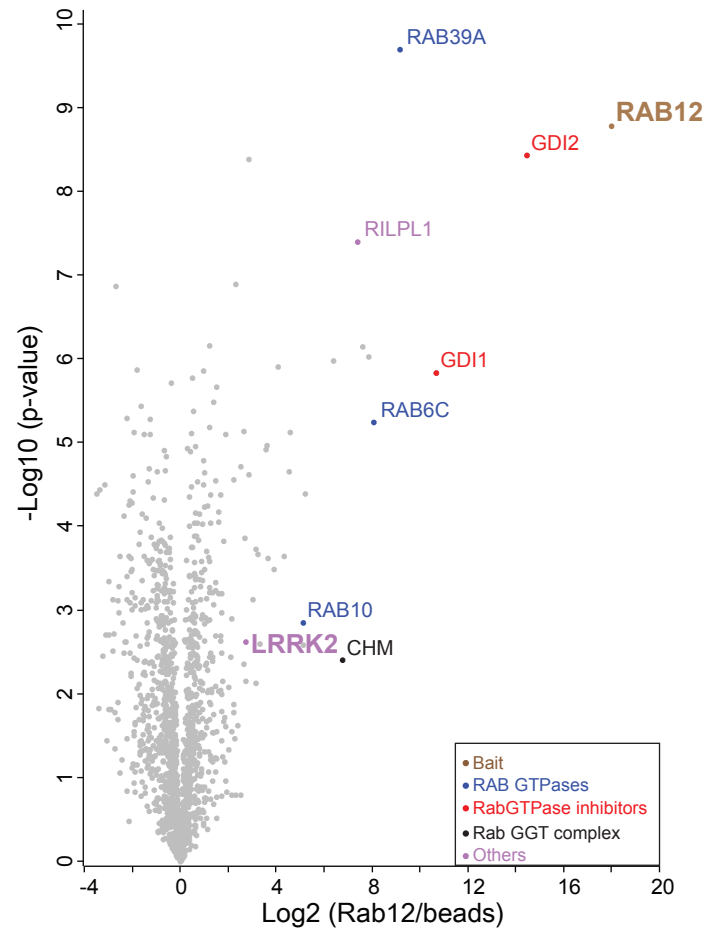

Supplement: supp [file elife-12813-supp-v1.zip]
